# Supplementary material for: Integrated multi-omics reveals the ITGB2-IL2RB-NK axis in promoting papillary thyroid carcinoma progression and immune microenvironment crosstalk
Source: Research Square preprint supplement (doi:10.21203/rs.3.rs-7218110/v1), 2025-08-21
Supplement: Supplementary file 1 [file 23cbf5b5c4bf26d5df035452.xlsx]

## Sheet: Sheet1
Table S3. Causal associations between proteins and papillary thyroid carcinoma identified by deCODE pQTL-based Mendelian randomization.
id	nsnp	method	b	se	or	or_lci95	or_uci95	pvalue
10011_65_OCRL_OCRL	43	Inverse variance weighted	-0.236864	0.090573	0.789098	0.660745	0.942385	0.00891818
10024_44_HOGA1_HOGA1	10	Inverse variance weighted	-0.397527	0.191346	0.67198	0.461827	0.977763	0.0377531
10035_6_DUSP4_DUS4	7	Inverse variance weighted	-0.66932	0.30889	0.512057	0.279502	0.938104	0.0302461
10037_98_SIGLEC12_SIG12	175	Inverse variance weighted	0.0528336	0.0268737	1.05425	1.00016	1.11127	0.0492994
10074_128_BRD2_BRD2	5	Inverse variance weighted	-0.529986	0.260576	0.588613	0.353202	0.980928	0.0419617
10440_26_CLMP_ACAM	20	Inverse variance weighted	0.252448	0.121475	1.28717	1.01446	1.6332	0.0376915
10499_1_TMEM106A_T106A	12	Inverse variance weighted	0.378372	0.185106	1.45991	1.01569	2.09841	0.0409451
10539_30_CD99L2_C99L2	15	Inverse variance weighted	-0.421505	0.176029	0.656059	0.464627	0.926364	0.0166422
10574_10_AXL_AXL	148	Inverse variance weighted	-0.105831	0.0405406	0.899576	0.830862	0.973973	0.00904085
10606_34_TOR1AIP1_TOIP1	28	Inverse variance weighted	-0.255485	0.122671	0.774541	0.609011	0.985062	0.0372795
10630_5_HTATIP2_HTAI2	135	Inverse variance weighted	-0.0981166	0.0353743	0.906543	0.845819	0.971627	0.00554283
10731_10_HS3ST5_HS3S5	40	Inverse variance weighted	-0.228692	0.10218	0.795574	0.651183	0.971981	0.0252131
10752_8_CDYL2_CDYL2	16	Inverse variance weighted	-0.309939	0.131603	0.733492	0.566725	0.949332	0.0185176
10753_31_ADAM7_ADAM7	31	Inverse variance weighted	-0.167116	0.0844768	0.846101	0.716992	0.998459	0.0479002
10772_21_CSGALNACT2_CGAT2	19	Inverse variance weighted	-0.384457	0.133922	0.68082	0.523644	0.885174	0.00409481
10785_8_LRRC52_LRC52	15	Inverse variance weighted	0.357712	0.160048	1.43005	1.045	1.95699	0.0254153
10815_2_HABP4_HABP4	52	Inverse variance weighted	-0.369551	0.1786	0.691044	0.486943	0.980694	0.0385316
10816_150_PILRA_PILRA_isoform_FDF03_M14	533	Inverse variance weighted	-0.0503676	0.0154447	0.95088	0.922526	0.980105	0.00110963
10851_77_EBI3_IL27B	314	Inverse variance weighted	0.0481619	0.0228499	1.04934	1.00338	1.0974	0.0350521
10910_6_CEACAM4_CEAM4	11	Inverse variance weighted	-0.511103	0.218914	0.599834	0.39056	0.921244	0.0195582
10916_44_PLA2R1_PLA2R	463	Inverse variance weighted	-0.0561399	0.0202982	0.945407	0.908533	0.983778	0.00567913
10924_258_CYB5D2_NEUFC	34	Inverse variance weighted	-0.161845	0.0770651	0.850573	0.731329	0.989261	0.0357198
10940_25_SRL_SRCA	17	Inverse variance weighted	-0.265252	0.129265	0.767013	0.595347	0.988179	0.0401701
11071_1_IL5_IL_5	4	Inverse variance weighted	-0.711554	0.354369	0.490881	0.245093	0.983153	0.0446492
11112_18_TMEM167A_KISHA	3	Inverse variance weighted	-1.02955	0.511541	0.357166	0.13105	0.973427	0.0441516
11130_158_CACNB4_CACB4	10	Inverse variance weighted	-0.691682	0.183133	0.500733	0.34972	0.716956	0.00015877
11144_10_DEFB116_DB116	7	Inverse variance weighted	-0.534013	0.22887	0.586247	0.374337	0.918119	0.0196343
11145_72_KIAA1549L_K154L	49	Inverse variance weighted	-0.12799	0.0615745	0.879862	0.779832	0.992722	0.0376516
11168_3_MEGF10_MEG10	15	Inverse variance weighted	-0.404582	0.173564	0.667256	0.474845	0.937632	0.0197518
11185_145_GCH1_GCH1	21	Inverse variance weighted	-0.368607	0.175373	0.691697	0.490496	0.97543	0.0355665
11187_11_CLEC12A_CL12A	451	Inverse variance weighted	-0.0372623	0.0178142	0.963423	0.930365	0.997656	0.0364638
11196_31_COL6A3_Collagen_alpha_3_VI_	4	Inverse variance weighted	1.04223	0.3582	2.83554	1.40517	5.72192	0.00361846
11247_20_NAGS_NAGS	10	Inverse variance weighted	-0.454305	0.225626	0.634889	0.407982	0.987995	0.0440589
11275_94_LRP1B_LRP1B	21	Inverse variance weighted	-0.227723	0.105558	0.796345	0.647513	0.979386	0.0309804
11302_237_TNR_TENR	34	Inverse variance weighted	-0.259603	0.10846	0.771358	0.623639	0.954068	0.0166871
11308_8_CREB3L4_CR3L4	110	Inverse variance weighted	-0.0823278	0.0411145	0.92097	0.849666	0.998258	0.0452412
11327_56_CLK2_CLK2	73	Inverse variance weighted	-0.129043	0.0641728	0.878936	0.775055	0.996741	0.0443391
11358_15_GRB10_GRB10	7	Inverse variance weighted	-0.48913	0.218441	0.61316	0.399607	0.940837	0.0251441
11425_31_RUFY1_RUFY1	11	Inverse variance weighted	-0.548779	0.213489	0.577655	0.380139	0.877797	0.0101544
11441_11_PYGL_PYGL	26	Inverse variance weighted	-0.433585	0.179344	0.648181	0.456074	0.921207	0.0156227
11444_49_POLR3F_RPC6	3	Inverse variance weighted	-0.84755	0.389236	0.428464	0.199797	0.918836	0.0294454
11464_9_RELB_RELB	50	Inverse variance weighted	-0.173613	0.0827897	0.840622	0.714708	0.988719	0.0359903
11465_4_GPR135_GP135	14	Inverse variance weighted	-0.374775	0.17897	0.687444	0.484055	0.976293	0.0362546
11480_1_ALDH3A1_Aldehyde_dehydrogenase__class_3	4	Inverse variance weighted	-0.564229	0.258338	0.568798	0.342812	0.943757	0.0289569
11510_31_APOL1_Apo_L1	204	Inverse variance weighted	-0.0656373	0.0293251	0.93647	0.884162	0.991873	0.025204
11530_37_HMBS_HEM3	7	Inverse variance weighted	-0.649201	0.300674	0.522463	0.289812	0.941878	0.0308386
11537_12_TFR2_TFR2	15	Inverse variance weighted	-0.327726	0.16675	0.72056	0.519673	0.999103	0.0493704
11539_4_ATP5J2_ATPK	14	Inverse variance weighted	-0.430175	0.181995	0.650395	0.45526	0.92917	0.0180955
11540_37_FOXO3_FOXO3A	6	Inverse variance weighted	1.11035	0.468673	3.03544	1.21137	7.60613	0.0178293
11587_5_MGA_MGAP	10	Inverse variance weighted	-0.378805	0.167498	0.684679	0.493072	0.950746	0.0237253
11645_9_P4HA1_P4HA1	3	Inverse variance weighted	-1.04021	0.407949	0.35338	0.158851	0.786132	0.0107768
11692_21_SHC4_SHC4	7	Inverse variance weighted	-1.07515	0.313607	0.341248	0.184554	0.630984	0.000607336
11988_24_PTPRH_PTPRH	12	Inverse variance weighted	-0.473391	0.195128	0.622886	0.424925	0.913072	0.0152638
12332_7_EEF2K_EF2K	94	Inverse variance weighted	-0.111665	0.049742	0.894344	0.811266	0.98593	0.0247761
12357_41_SNAP29_SNP29	5	Inverse variance weighted	-0.849551	0.299677	0.427607	0.237659	0.769369	0.00458411
12391_27_PDZD7_PDZD7	15	Inverse variance weighted	-0.392123	0.168807	0.675621	0.485301	0.940578	0.0201842
12401_3_STAMBPL1_STALP	7	Inverse variance weighted	-0.527878	0.218274	0.589855	0.384544	0.904783	0.0155883
12436_84_GSTO1_GST_omega_1	340	Inverse variance weighted	-0.0831631	0.0260172	0.920201	0.874453	0.968343	0.00139122
12455_48_MYNN_MYNN	19	Inverse variance weighted	-0.358313	0.181525	0.698854	0.489632	0.997479	0.0483924
12475_48_CLIC5_CLIC5	60	Inverse variance weighted	-0.137838	0.0684639	0.87124	0.761834	0.996358	0.0440834
12497_29_NUDT16L1_SDOS	10	Inverse variance weighted	-0.380712	0.182314	0.683375	0.478047	0.976894	0.0367776
12511_83_SLC41A2_S41A2	22	Inverse variance weighted	-0.326236	0.141761	0.721635	0.546573	0.952767	0.021374
12527_50_THRA_THA	10	Inverse variance weighted	-0.460211	0.211846	0.631151	0.416683	0.956005	0.0298267
12560_9_NT5C_NT5C	36	Inverse variance weighted	-0.185497	0.0575167	0.830692	0.742131	0.92982	0.00125934
12585_39_ERCC1_ERCC1	13	Inverse variance weighted	-0.427023	0.179764	0.652448	0.458699	0.928034	0.0175266
12612_37_PSMB1_PSB1	25	Inverse variance weighted	-0.189963	0.0845005	0.826989	0.700764	0.975951	0.0245714
12632_14_NAT1_ARY1	44	Inverse variance weighted	0.180664	0.0788073	1.19801	1.02655	1.39812	0.0218781
12671_35_SULT1B1_ST1B1	72	Inverse variance weighted	-0.143059	0.0568911	0.866703	0.775254	0.968941	0.0119167
12685_57_HOMER2_HOME2	59	Inverse variance weighted	-0.137482	0.0549538	0.87155	0.782555	0.970666	0.0123572
12700_9_ACLY_ACLY	4	Inverse variance weighted	-0.883402	0.367888	0.413374	0.200997	0.850151	0.0163379
12716_3_ZNF175_ZN175	20	Inverse variance weighted	-0.317788	0.136123	0.727757	0.557335	0.95029	0.0195657
12750_9_ITGB2_LFA_1_beta_2	13	Inverse variance weighted	-0.374615	0.184646	0.687554	0.478777	0.987372	0.042476
12779_30_PRDM4_PRDM4	4	Inverse variance weighted	-0.611732	0.218519	0.54241	0.353444	0.832406	0.00511899
12781_2_TARBP2_TRBP2	3	Inverse variance weighted	-1.04794	0.526555	0.35066	0.124932	0.984237	0.0465717
12794_6_NLRP4_NALP4	9	Inverse variance weighted	-0.598121	0.263592	0.549844	0.327994	0.92175	0.0232611
12827_37_RGS3_RGS3	20	Inverse variance weighted	-0.35856	0.165121	0.698682	0.505505	0.96568	0.0298936
12862_14_NEDD9_CASL	9	Inverse variance weighted	-0.558331	0.241335	0.572163	0.356526	0.918224	0.0206947
12892_10_SYTL1_SYTL1	15	Inverse variance weighted	-0.657938	0.230635	0.517918	0.329565	0.813919	0.00433457
12895_28_DGKB_DGKB	21	Inverse variance weighted	-0.304146	0.14641	0.737753	0.553713	0.982964	0.037768
12936_38_RLBP1_RLBP1	13	Inverse variance weighted	-0.446507	0.169961	0.639859	0.458576	0.892808	0.00861116
12945_33_RAB18_RAB18	17	Inverse variance weighted	-0.302401	0.146991	0.739042	0.554048	0.985803	0.0396599
12954_71_PPARA_PPARa	4	Inverse variance weighted	-0.670272	0.258733	0.51157	0.308082	0.849459	0.00958106
13025_4_FRS2_FRS2	13	Inverse variance weighted	-0.403686	0.172004	0.667854	0.476726	0.935608	0.0189273
13056_18_SLC6A16_S6A16	9	Inverse variance weighted	-0.756233	0.323567	0.469432	0.24897	0.885112	0.0194301
13094_75_RSPO3_RSPO3	27	Inverse variance weighted	0.19525	0.0971258	1.21561	1.00489	1.47052	0.0444022
13111_79_BCL6_BCL6	23	Inverse variance weighted	-0.303377	0.13922	0.73832	0.562003	0.969954	0.0293226
13118_5_SMOC1_SMOC1	26	Inverse variance weighted	0.23124	0.104359	1.26016	1.02706	1.54617	0.026704
13236_25_WNT3A_WNT3A	45	Inverse variance weighted	-0.230592	0.0908441	0.794064	0.664549	0.948819	0.0111385
13378_80_C5orf63_YD286	22	Inverse variance weighted	-0.286723	0.142681	0.75072	0.567578	0.992956	0.0444794
13386_248_RNF34_RNF34	11	Inverse variance weighted	-0.466784	0.230413	0.627016	0.39916	0.98494	0.0427792
13388_57_PCSK1_NEC1	302	Inverse variance weighted	0.115145	0.0262269	1.12204	1.06582	1.18122	1.13E-05
13430_50_SLC14A1_UT1	10	Inverse variance weighted	-0.434122	0.216768	0.647833	0.423591	0.990786	0.045209
13438_115_CHRD_CHRD	29	Inverse variance weighted	0.599055	0.141426	1.8204	1.37969	2.40188	2.28E-05
13453_2_MRPL33_RM33	83	Inverse variance weighted	-0.107433	0.0518395	0.898136	0.811364	0.994189	0.0382262
13485_20_TMEM87B_TM87B	10	Inverse variance weighted	-0.412709	0.188982	0.661855	0.456981	0.958578	0.028973
13509_5_SCAMP5_SCAM5	10	Inverse variance weighted	-0.772201	0.298461	0.461995	0.257385	0.829262	0.00967367
13557_3_PVRL3_Nectin_3	17	Inverse variance weighted	-0.405968	0.176575	0.666332	0.471397	0.941876	0.0214976
13565_2_RBL2_p130	151	Inverse variance weighted	-0.0945989	0.0407346	0.909738	0.839928	0.985349	0.0202156
13603_7_RFESD_RFESD	13	Inverse variance weighted	0.536266	0.210233	1.70961	1.13225	2.58138	0.0107472
13605_16_ANXA10_ANX10	13	Inverse variance weighted	-0.409662	0.170789	0.663875	0.475016	0.927821	0.0164558
13610_9_MAGEA10_MAGE_10	47	Inverse variance weighted	-0.147578	0.0713534	0.862795	0.750188	0.992304	0.0386144
13645_14_DHX38_PRP16	26	Inverse variance weighted	-0.252427	0.121711	0.776913	0.612027	0.986222	0.0380804
13672_3_HSPA6_HSP76	27	Inverse variance weighted	-0.271159	0.131998	0.762495	0.588678	0.987634	0.0399497
13676_46_INHBB_Inhibin_bB_chain	40	Inverse variance weighted	-0.163482	0.0706984	0.849182	0.739301	0.975395	0.0207567
13713_164_SEC22A_SC22A	3	Inverse variance weighted	-0.931656	0.453468	0.393901	0.161952	0.958047	0.039926
13719_19_PAK4_PAK4	4	Inverse variance weighted	0.971531	0.393814	2.64199	1.22098	5.71678	0.0136257
13933_276_NAB1_NAB1	4	Inverse variance weighted	-0.782556	0.375254	0.457236	0.219138	0.954033	0.0370329
13942_140_SPSB1_SPSB1	6	Inverse variance weighted	-0.646916	0.243087	0.523658	0.325183	0.843272	0.00778504
13950_9_COL4A3BP_C43BP	4	Inverse variance weighted	-1.28452	0.419771	0.276782	0.121569	0.630166	0.00221294
13954_9_GNPNAT1_GNA1	3	Inverse variance weighted	-0.898768	0.399981	0.407071	0.185866	0.891539	0.0246382
13977_28_BARD1_BARD1	12	Inverse variance weighted	-0.46435	0.22107	0.628544	0.407527	0.969425	0.0356881
14131_37_EFNB2_EFNB2	17	Inverse variance weighted	0.32331	0.143059	1.38169	1.04385	1.82888	0.0238229
14135_3_RXFP1_RXFP1	9	Inverse variance weighted	-0.489462	0.204154	0.612956	0.410819	0.914552	0.0165065
14250_115_BLMH_BLMH	4	Inverse variance weighted	-0.781752	0.330561	0.457604	0.239392	0.87472	0.0180338
14254_27_PTPN4_PTN4	53	Inverse variance weighted	-0.126746	0.0550934	0.880957	0.790785	0.981412	0.021416
14331_262_DYNLT1_DYLT1	14	Inverse variance weighted	-0.341666	0.173751	0.710585	0.505494	0.998887	0.0492513
14624_51_CTCF_CTCF	6	Inverse variance weighted	-0.733802	0.360104	0.48008	0.237021	0.972391	0.041575
14631_22_DUSP16_DUS16	14	Inverse variance weighted	-0.357337	0.171694	0.699537	0.499645	0.979399	0.0374118
14689_3_SEC13_SEC13	41	Inverse variance weighted	-0.259067	0.0919831	0.771771	0.644453	0.924243	0.0048555
14747_9_CRLF1_CRLF1	31	Inverse variance weighted	0.190529	0.0915139	1.20989	1.01122	1.44758	0.0373455
15297_3_S100A3_S100A3	10	Inverse variance weighted	-0.530758	0.264044	0.588159	0.350539	0.986855	0.044419
15305_7_SCGN_Secretagogin	12	Inverse variance weighted	-0.372615	0.180487	0.688931	0.483662	0.981316	0.0389704
15306_20_IGJ_IgJ	11	Inverse variance weighted	-0.419785	0.207403	0.657188	0.437668	0.986813	0.0429696
15313_28_MAD2L1_MD2L1	15	Inverse variance weighted	-0.357915	0.18095	0.699132	0.490379	0.996751	0.0479307
15329_167_ROBLD3_MAPIP	8	Inverse variance weighted	-0.591617	0.268298	0.553431	0.327102	0.936363	0.027449
15331_47_RBBP4_RBBP4	4	Inverse variance weighted	-1.00221	0.35645	0.367066	0.182527	0.738176	0.0049287
15447_45_SORD_Sorbitol_dehydrogenase	46	Inverse variance weighted	-0.219927	0.0875884	0.802577	0.675974	0.952892	0.0120419
15462_28_CD8A_CD8A	143	Inverse variance weighted	0.148642	0.0423177	1.16026	1.06791	1.2606	0.000443873
15466_30_COL9A1_CO9A1	10	Inverse variance weighted	-0.482562	0.229847	0.6172	0.393348	0.968446	0.0357731
15560_52_TCN2_Apo_TC_II	602	Inverse variance weighted	-0.0519198	0.0181743	0.949405	0.916181	0.983834	0.00427977
15573_110_NCAN_CSPG3	28	Inverse variance weighted	-0.378161	0.106451	0.68512	0.556102	0.844072	0.00038166
15574_37_CCNA2_Cyclin_A	3	Inverse variance weighted	-0.728084	0.318663	0.482833	0.25855	0.901673	0.0223242
15584_9_CFHR2_FHR2	590	Inverse variance weighted	-0.033763	0.0171349	0.966801	0.93487	0.999821	0.0487899
15585_304_FBLN5_fibulin_5	14	Inverse variance weighted	-0.452193	0.174403	0.636231	0.452023	0.895509	0.00951967
15626_223_HSPG2_Perlecan	41	Inverse variance weighted	0.196239	0.081473	1.21682	1.03723	1.4275	0.0160123
15634_139_SLIT1_SLIT1	6	Inverse variance weighted	-0.824569	0.30453	0.438424	0.241364	0.79637	0.0067755
15636_49_SORCS1_SORC1	10	Inverse variance weighted	0.849614	0.242691	2.33874	1.45345	3.76327	0.000463863
15637_38_SORCS3_SORC3	4	Inverse variance weighted	-0.736163	0.349546	0.478948	0.241407	0.950228	0.0351994
15666_21_BMP2_BMP_2	4	Inverse variance weighted	-0.739879	0.368845	0.477172	0.231583	0.9832	0.0448632
15692_300_NODAL_NODAL	8	Inverse variance weighted	-0.593878	0.288042	0.552182	0.313976	0.97111	0.0392292
16060_99_NID2_NID2	167	Inverse variance weighted	-0.0787721	0.0344534	0.924251	0.863898	0.98882	0.0222346
16323_8_NRXN3_NRX3A	36	Inverse variance weighted	0.256057	0.100106	1.29183	1.06168	1.57187	0.0105321
16583_8_NUDT2_AP4A	47	Inverse variance weighted	-0.207012	0.0672167	0.81301	0.712656	0.927495	0.00207155
16591_71_CHIA_CHIA	17	Inverse variance weighted	-0.377297	0.185074	0.685712	0.477094	0.985554	0.0414875
16594_44_FAIM_FAIM1	74	Inverse variance weighted	0.106983	0.0537982	1.11292	1.00154	1.23668	0.0467453
16607_78_GSN_Gelsolin	51	Inverse variance weighted	0.157113	0.0787559	1.17013	1.00276	1.36544	0.0460499
16621_77_APOA1BP_AIBP	3	Inverse variance weighted	-0.471593	0.164018	0.624007	0.452454	0.860607	0.00403712
16763_11_LECT2_LECT2	244	Inverse variance weighted	-0.0683122	0.026708	0.933969	0.886335	0.984162	0.0105353
16773_29_SCUBE3_SCUB3	22	Inverse variance weighted	-0.272963	0.135962	0.761121	0.58307	0.993544	0.0446815
16809_1_NME4_NDKM	15	Inverse variance weighted	0.655986	0.188874	1.92704	1.33082	2.79039	0.000514423
16845_15_MPZL1_MPZL1	6	Inverse variance weighted	-0.661961	0.298405	0.515839	0.287413	0.92581	0.0265324
16877_19_MSRB2_MSRB2	13	Inverse variance weighted	-0.421136	0.192223	0.656301	0.450276	0.956592	0.0284613
16900_29_MDGA1_MDGA1	483	Inverse variance weighted	-0.0356158	0.0160318	0.965011	0.935159	0.995815	0.0263123
16915_153_SEMA4A_SEM4A	85	Inverse variance weighted	0.184468	0.0595198	1.20258	1.07016	1.35138	0.00193994
17152_10_KIR2DS4_KI2S4	12	Inverse variance weighted	-0.471552	0.17851	0.624033	0.439802	0.885438	0.00825145
17172_19_STATH_STAT	25	Inverse variance weighted	0.347234	0.130875	1.41515	1.09496	1.82896	0.00797382
17224_12_OGN_MIME	85	Inverse variance weighted	-0.172159	0.0610016	0.841845	0.746976	0.948763	0.00476939
17231_1_LCP1_L_plastin	19	Inverse variance weighted	0.274412	0.100517	1.31576	1.08047	1.60228	0.00633356
17320_19_AASDHPPT_ADPPT	5	Inverse variance weighted	-1.13291	0.448231	0.322093	0.133795	0.775396	0.0114871
17331_138_KREMEN1_KREM1	80	Inverse variance weighted	0.177681	0.0687311	1.19444	1.0439	1.36669	0.00973322
17383_4_STARD5_STAR5	28	Inverse variance weighted	0.246163	0.120905	1.27911	1.00923	1.62115	0.0417499
17397_8_HSD17B11_DHB11	3	Inverse variance weighted	-0.851014	0.385781	0.426982	0.200459	0.90948	0.0273876
17400_71_ACOT8_ACOT8	11	Inverse variance weighted	-0.399066	0.201748	0.670946	0.451811	0.996366	0.0479235
17427_26_NLGN3_NLGN3	3	Inverse variance weighted	-1.04357	0.48837	0.352194	0.13523	0.917257	0.0326103
17691_1_TPP1_TPP1	35	Inverse variance weighted	0.279812	0.0915933	1.32288	1.10549	1.58302	0.00225105
17712_7_IDI1_IDI1	5	Inverse variance weighted	-0.793232	0.2963	0.45238	0.253098	0.808572	0.0074256
17750_8_RRM2_RIR2	52	Inverse variance weighted	-0.232574	0.0866103	0.792491	0.66876	0.939115	0.00724668
17796_15_IMPA1_IMPA1	23	Inverse variance weighted	0.23887	0.103918	1.26981	1.03582	1.55667	0.0215255
17799_9_PGLS_6PGL	18	Inverse variance weighted	-0.453778	0.148068	0.635224	0.475214	0.849112	0.00217918
17828_3_S100A14_S100A14	6	Inverse variance weighted	-0.752282	0.267852	0.47129	0.278797	0.796688	0.00497617
17857_6_ACADL_ACADL	8	Inverse variance weighted	-0.72782	0.246702	0.482961	0.297793	0.783265	0.00317572
18177_49_NAE1_ULA1	17	Inverse variance weighted	-0.309619	0.155189	0.733726	0.541296	0.994566	0.0460305
18198_51_HBQ1_HBAT	19	Inverse variance weighted	0.363555	0.181871	1.43843	1.00711	2.05448	0.0456113
18214_2_GCLM_GSH0	7	Inverse variance weighted	-0.567937	0.232037	0.566693	0.359612	0.893022	0.0143807
18231_147_PRND_PRND	20	Inverse variance weighted	0.404877	0.169426	1.49912	1.07552	2.08956	0.0168622
18275_5_CRIP1_CRIP1	89	Inverse variance weighted	-0.114045	0.0468986	0.892218	0.813861	0.978119	0.0150267
18276_34_TCL1B_TCL1B	8	Inverse variance weighted	-0.602424	0.251848	0.547483	0.33419	0.896907	0.016756
18307_71_PPA2_PPase_2	5	Inverse variance weighted	-0.695181	0.325628	0.498984	0.263577	0.944641	0.0327696
18319_7_PDHX_ODPX	3	Inverse variance weighted	0.593444	0.288583	1.81021	1.02821	3.18696	0.0397431
18343_10_DECR2_DECR2	118	Inverse variance weighted	0.155022	0.0448919	1.16768	1.06933	1.27508	0.000553929
18396_10_AES_AES	14	Inverse variance weighted	-0.398337	0.200569	0.671436	0.453186	0.994792	0.0470296
18401_18_ALKBH3_ALKB3	36	Inverse variance weighted	-0.20756	0.0802634	0.812565	0.694283	0.950998	0.00971014
18434_141_TBPL1_TBPL1	26	Inverse variance weighted	0.648561	0.144168	1.91279	1.44194	2.53738	6.84E-06
18830_1_ITLN1_Omentin	35	Inverse variance weighted	-0.258541	0.115523	0.772177	0.615718	0.968394	0.0252208
18837_9_SGTB_SGTB	10	Inverse variance weighted	-0.474229	0.206232	0.622365	0.415429	0.93238	0.0214768
18859_7_EIF4EBP3_4EBP3	4	Inverse variance weighted	-0.747992	0.377395	0.473316	0.225895	0.991737	0.0474809
18875_125_COL2A1_Chondrocalcin	298	Inverse variance weighted	0.0718992	0.0283005	1.07455	1.01657	1.13584	0.0110673
18878_15_GREM1_GREM1	118	Inverse variance weighted	0.128329	0.0366907	1.13693	1.05804	1.2217	0.000469467
18896_23_HS6ST3_H6ST3	12	Inverse variance weighted	0.523109	0.262905	1.68727	1.00785	2.8247	0.0466208
18910_45_LIN7A_LIN7A	8	Inverse variance weighted	0.401506	0.203378	1.49407	1.00289	2.22582	0.0483601
18930_28_SLIT2_SLIT2	24	Inverse variance weighted	0.302459	0.142418	1.35318	1.02359	1.78889	0.0336919
18943_4_PTGR2_PTGR2	30	Inverse variance weighted	-0.304229	0.109305	0.737692	0.595433	0.913938	0.00538058
18947_3_LRRC3B_LRC3B	10	Inverse variance weighted	-0.517825	0.237178	0.595815	0.374301	0.948422	0.0290157
19109_32_TCEAL8_TCAL8	13	Inverse variance weighted	-0.593906	0.245687	0.552166	0.341143	0.893723	0.015635
19117_3_PPP1R14A_PP14A	17	Inverse variance weighted	0.255049	0.126417	1.29052	1.0073	1.65339	0.0436418
19141_22_DAP_DAP1	311	Inverse variance weighted	0.0568014	0.018017	1.05845	1.02172	1.09649	0.00161795
19195_85_RPS5_RS5	5	Inverse variance weighted	-0.510165	0.220372	0.600397	0.38981	0.924747	0.0206122
19196_73_HOPX_HOP	8	Inverse variance weighted	-0.525311	0.22544	0.591372	0.380156	0.919939	0.019798
19229_92_HOMER1_HOME1	65	Inverse variance weighted	-0.115695	0.0528585	0.890747	0.803083	0.98798	0.0286135
19238_12_GLUL_GLNA	4	Inverse variance weighted	1.53317	0.540355	4.63282	1.60652	13.36	0.0045492
19251_56_SRGN_Platelet_proteoglycan	29	Inverse variance weighted	0.27103	0.0910817	1.31131	1.09692	1.56761	0.00292341
19261_12_SDCBP2_SDCB2	10	Inverse variance weighted	-0.522161	0.175366	0.593237	0.420682	0.836571	0.00290561
19277_4_TSTD1_KAT	27	Inverse variance weighted	0.176346	0.0735135	1.19285	1.03279	1.37772	0.0164478
19361_78_MATN3_MATN3	296	Inverse variance weighted	-0.0522868	0.0239709	0.949057	0.905498	0.99471	0.0291642
19372_7_MDGA2_MDGA2	288	Inverse variance weighted	0.080474	0.0254276	1.0838	1.03111	1.13918	0.00155174
19553_14_STX1A_STX1a	40	Inverse variance weighted	-0.22952	0.0981211	0.794915	0.655841	0.963481	0.0193275
19555_1_SUMO2_SUMO2	3	Inverse variance weighted	-0.790633	0.351435	0.453558	0.227764	0.903192	0.0244664
19612_3_CD81_CD81	9	Inverse variance weighted	-0.501896	0.240552	0.605382	0.377804	0.970044	0.0369395
19614_8_TCN1_Holo_TC_I	138	Inverse variance weighted	0.088991	0.0443096	1.09307	1.00215	1.19224	0.0446017
19637_9_CRH_CRH	7	Inverse variance weighted	0.509288	0.25682	1.66411	1.00594	2.7529	0.0473614
2211_9_TIMP1_TIMP_1	5	Inverse variance weighted	-0.679882	0.254218	0.506677	0.307848	0.833924	0.00748632
2247_20_PROK1_EG_VEGF	5	Inverse variance weighted	-0.666654	0.294152	0.513424	0.288462	0.913825	0.0234294
2431_17_CTSG_Cathepsin_G	11	Inverse variance weighted	-0.655273	0.222849	0.5193	0.335525	0.803732	0.0032775
2505_49_GFRA3_GFRa_3	14	Inverse variance weighted	-0.439507	0.212574	0.644354	0.424793	0.977398	0.0386829
2516_57_CCL21_6Ckine	107	Inverse variance weighted	-0.130167	0.0440001	0.877948	0.805407	0.957024	0.00309297
2524_56_HMGB1_HMG_1	19	Inverse variance weighted	-0.409431	0.206319	0.664028	0.443164	0.994966	0.0472047
2567_5_CFI_Factor_I	19	Inverse variance weighted	-0.418019	0.139354	0.65835	0.500999	0.865121	0.00270245
2590_69_ROR1_ROR1	45	Inverse variance weighted	0.139678	0.0693677	1.1499	1.00372	1.31737	0.0440526
2632_5_IL12RB1_IL_12_Rb1	16	Inverse variance weighted	-0.383062	0.187583	0.681771	0.472024	0.984719	0.0411427
2645_54_PRKCZ_PKC_Z	3	Inverse variance weighted	-0.810282	0.380959	0.444733	0.210776	0.938378	0.0334239
2743_5_SHH_Sonic_Hedgehog	15	Inverse variance weighted	0.648905	0.172599	1.91345	1.36426	2.68371	0.000170178
2754_50_C3_C3	14	Inverse variance weighted	-0.432549	0.190488	0.648853	0.446684	0.942525	0.0231625
2828_82_SPINT1_HAI_1	84	Inverse variance weighted	-0.130658	0.0523789	0.877518	0.7919	0.972393	0.0126142
2833_20_KLK4_Kallikrein_4	5	Inverse variance weighted	-0.587481	0.257185	0.555725	0.335691	0.919985	0.0223556
2890_59_CCL28_CCL28	49	Inverse variance weighted	0.16384	0.0783859	1.17803	1.01026	1.37366	0.0366028
2950_57_IGFBP4_IGFBP_4	4	Inverse variance weighted	-0.798267	0.371228	0.450108	0.217431	0.931779	0.0315283
2977_7_EDAR_EDAR	81	Inverse variance weighted	0.143731	0.056242	1.15457	1.03406	1.28913	0.0106013
2997_8_JAM2_JAM_B	11	Inverse variance weighted	-0.428011	0.201951	0.651804	0.438746	0.968326	0.0340587
3054_3_HP_Haptoglobin__Mixed_Type	440	Inverse variance weighted	-0.0519834	0.0198377	0.949345	0.913141	0.986984	0.00878166
3057_55_WISP1_WISP_1	27	Inverse variance weighted	-0.176891	0.0875975	0.837871	0.705688	0.994813	0.0434493
3073_51_IL18BP_IL_18_BPa	13	Inverse variance weighted	0.337545	0.157864	1.4015	1.02853	1.90972	0.0325002
3074_6_LBP_LBP	179	Inverse variance weighted	0.0764381	0.0304106	1.07944	1.01698	1.14573	0.0119527
3166_92_CD33_Siglec_3	262	Inverse variance weighted	0.0429102	0.0206866	1.04384	1.00237	1.08704	0.0380516
3181_50_CTSS_Cathepsin_S	63	Inverse variance weighted	0.121759	0.0619506	1.12948	1.00034	1.2753	0.0493662
3184_25_F7_Coagulation_Factor_VII	131	Inverse variance weighted	-0.152368	0.0324903	0.858672	0.805695	0.915132	2.74E-06
3189_61_TMPRSS15_Enterokinase	12	Inverse variance weighted	-0.570725	0.194591	0.565116	0.385921	0.827516	0.00335762
3220_40_RET_RET	84	Inverse variance weighted	-0.108367	0.0439978	0.897298	0.823162	0.978112	0.0137778
3283_21_TGFBI_BGH3	120	Inverse variance weighted	0.125948	0.0491772	1.13422	1.03	1.24899	0.0104341
3302_58_CST7_CYTF	286	Inverse variance weighted	0.0529354	0.0266922	1.05436	1.00062	1.11099	0.0473471
3316_58_SERPIND1_Heparin_cofactor_II	46	Inverse variance weighted	-0.373667	0.0734997	0.688206	0.595874	0.794845	3.70E-07
3322_52_LRIG3_LRIG3	191	Inverse variance weighted	0.0826217	0.0345169	1.08613	1.01508	1.16215	0.0166811
3327_27_NTN4_NET4	29	Inverse variance weighted	-0.201931	0.0826985	0.817151	0.694877	0.960941	0.0146152
3329_14_PGLYRP1_PGRP_S	51	Inverse variance weighted	0.191311	0.090046	1.21084	1.01493	1.44456	0.0336207
3340_53_THBS4_TSP4	24	Inverse variance weighted	-0.201512	0.0860883	0.817494	0.690565	0.967752	0.0192444
3356_50_CA7_Carbonic_anhydrase_VII	3	Inverse variance weighted	-0.956145	0.35724	0.384372	0.190837	0.774178	0.00744013
3364_76_CTSV_Cathepsin_V	49	Inverse variance weighted	0.283057	0.0949331	1.32718	1.10185	1.5986	0.00286698
3366_51_ECM1_ECM1	201	Inverse variance weighted	-0.163111	0.0334024	0.849497	0.795663	0.906973	1.04E-06
3378_49_KLK7_Kallikrein_7	34	Inverse variance weighted	-0.182768	0.0700017	0.832962	0.72617	0.955458	0.00903035
3432_21_EPHA3_EPHA3	3	Inverse variance weighted	-0.97558	0.42277	0.376974	0.164605	0.863336	0.0210218
3448_13_INSR_IR	129	Inverse variance weighted	0.108244	0.0386247	1.11432	1.03308	1.20195	0.00507145
3449_58_SERPINA4_Kallistatin	123	Inverse variance weighted	0.090691	0.0458764	1.09493	1.00077	1.19795	0.0480579
3485_28_B2M_b2_Microglobulin	57	Inverse variance weighted	-0.301003	0.0762689	0.740076	0.637316	0.859404	7.93E-05
3499_77_IL17B_IL_17B	10	Inverse variance weighted	-0.43408	0.220855	0.647861	0.420229	0.998797	0.0493621
3580_25_SERPINA1_a1_Antitrypsin	133	Inverse variance weighted	0.089673	0.0345493	1.09382	1.0222	1.17045	0.00944517
3592_4_CAMK1_CAMK1	285	Inverse variance weighted	-0.0536442	0.0271092	0.947769	0.898725	0.99949	0.0478365
3603_60_CLEC7A_CLC7A	3	Inverse variance weighted	-0.604292	0.254904	0.546461	0.331574	0.900613	0.0177562
3620_67_IL22RA1_IL22RA1	15	Inverse variance weighted	-0.4003	0.161362	0.670119	0.488425	0.919403	0.0131102
3651_50_KDR_VEGF_sR2	90	Inverse variance weighted	0.120395	0.0432027	1.12794	1.03636	1.22761	0.00532396
3710_49_PLG_Angiostatin	81	Inverse variance weighted	0.172214	0.0553158	1.18793	1.06587	1.32397	0.0018501
3803_10_CST5_CYTD	253	Inverse variance weighted	-0.0627991	0.0271794	0.939132	0.890412	0.990518	0.0208581
3864_5_RPS7_RS7	5	Inverse variance weighted	-0.390738	0.194357	0.676557	0.462236	0.99025	0.0443878
3894_15_NAGK_NAGK	27	Inverse variance weighted	-0.235405	0.11035	0.790251	0.636551	0.981062	0.0329032
4124_24_HSPA1A_HSP_70	27	Inverse variance weighted	-0.321567	0.146325	0.725012	0.54424	0.965827	0.0279758
4128_27_CCL24_Eotaxin_2	18	Inverse variance weighted	-0.389111	0.183634	0.677659	0.472824	0.971233	0.0340946
4151_6_PLG_Plasminogen	49	Inverse variance weighted	0.190631	0.0667513	1.21001	1.06162	1.37914	0.00429227
4156_74_TGFB2_TGF_b2	3	Inverse variance weighted	-0.703643	0.293982	0.494779	0.278079	0.880348	0.016689
4162_54_TF_Transferrin	10	Inverse variance weighted	0.419716	0.156005	1.52153	1.12069	2.06573	0.00713642
4232_19_IGF1R_IGF_I_sR	41	Inverse variance weighted	0.228138	0.0941424	1.25626	1.04458	1.51083	0.0153792
4420_7_ADAM12_ADAM12	3	Inverse variance weighted	-0.737189	0.354282	0.478457	0.238931	0.958107	0.0374527
4430_44_COLEC11_Collectin_Kidney_1	197	Inverse variance weighted	-0.0649238	0.0261476	0.937139	0.890321	0.986418	0.0130289
4435_66_ENPP7_ENPP7	205	Inverse variance weighted	0.0751887	0.0247482	1.07809	1.02704	1.13167	0.00238039
4437_56_ENTPD5_ENTP5	116	Inverse variance weighted	0.149988	0.042547	1.16182	1.06886	1.26286	0.000423121
4453_83_LRRTM3_LRRT3	4	Inverse variance weighted	-0.755357	0.291957	0.469843	0.265115	0.832667	0.00967542
4496_60_MMP12_MMP_12	136	Inverse variance weighted	-0.11456	0.0367328	0.891759	0.829812	0.95833	0.00181631
4542_24_CLU_Clusterin	12	Inverse variance weighted	-0.366924	0.149571	0.692862	0.516808	0.92889	0.0141602
4551_72_ADGRG5_GP114	14	Inverse variance weighted	-0.303274	0.151311	0.738397	0.548898	0.993319	0.0450374
4553_65_HDGFRP2_HDGR2	5	Inverse variance weighted	-0.589918	0.28149	0.554373	0.319295	0.962524	0.0361094
4557_61_KIRREL3_KIRR3	3	Inverse variance weighted	-0.927409	0.43765	0.395577	0.167763	0.932753	0.034085
4588_1_PPY_PH	46	Inverse variance weighted	-0.267118	0.0923817	0.765582	0.638785	0.917548	0.00383451
4703_87_LTA_TNF_b	3	Inverse variance weighted	-0.823517	0.40706	0.438885	0.197631	0.974648	0.0430645
4842_62_GPC3_Glypican_3	27	Inverse variance weighted	0.33045	0.116485	1.39159	1.10754	1.7485	0.00455603
4862_63_BMPR2_BMP_RII	12	Inverse variance weighted	-0.416184	0.194728	0.659559	0.450295	0.966073	0.0325774
4886_3_CCL7_MCP_3	103	Inverse variance weighted	0.122131	0.0389022	1.1299	1.04695	1.21943	0.00169272
4891_50_GCG_Glucagon	6	Inverse variance weighted	0.729253	0.271192	2.07353	1.21862	3.52821	0.00716523
4931_59_F3_TF	13	Inverse variance weighted	-0.347664	0.170664	0.706336	0.505521	0.986923	0.0416369
4971_1_CTSZ_CATZ	74	Inverse variance weighted	0.141386	0.0505661	1.15187	1.04318	1.27188	0.00517286
4982_54_PI3_Elafin	33	Inverse variance weighted	-0.163328	0.0790169	0.849313	0.727457	0.991581	0.0387344
5005_4_MAPK12_MK12	23	Inverse variance weighted	-0.257155	0.114527	0.773248	0.617777	0.967846	0.0247444
5008_51_SOD2_Mn_SOD	82	Inverse variance weighted	0.106647	0.0514262	1.11254	1.00587	1.23053	0.0380985
5021_13_PPA1_PPase	22	Inverse variance weighted	0.205855	0.0891857	1.22857	1.03154	1.46325	0.0209903
5036_50_TNFAIP6_TSG_6	222	Inverse variance weighted	0.0763622	0.0306714	1.07935	1.01638	1.14623	0.0127857
5070_76_TNFRSF6B_DcR3	5	Inverse variance weighted	-0.942219	0.322778	0.389762	0.207036	0.73376	0.00351053
5092_51_JAG1_JAG1	16	Inverse variance weighted	0.261243	0.114553	1.29854	1.0374	1.62542	0.0225755
5102_55_MICB_MICB	346	Inverse variance weighted	0.0550299	0.0149567	1.05657	1.02605	1.088	0.000233889
5111_15_NRXN3_NRX3B	40	Inverse variance weighted	0.277201	0.0983249	1.31943	1.08816	1.59986	0.00481383
5114_65_PRLR_Prolactin_Receptor	12	Inverse variance weighted	-0.360949	0.183759	0.697014	0.486209	0.999218	0.0495
5134_52_HAVCR2_TIMD3	121	Inverse variance weighted	-0.0904316	0.0399176	0.913537	0.844787	0.987881	0.0234848
5261_13_ABL2_ABL2	10	Inverse variance weighted	-0.480943	0.209284	0.6182	0.410188	0.931699	0.0215597
5262_57_BCAR3_BCAR3	5	Inverse variance weighted	-0.602244	0.268622	0.547581	0.323439	0.927053	0.0249629
5315_22_TNNT2_Troponin_T	14	Inverse variance weighted	-0.472326	0.179785	0.62355	0.438364	0.886968	0.00860993
5337_64_CD86_B7_2	10	Inverse variance weighted	0.562248	0.225844	1.75461	1.12704	2.73164	0.0127907
5347_59_CCNB1_Cyclin_B1	9	Inverse variance weighted	-0.548982	0.260154	0.577537	0.346843	0.961673	0.0348392
5349_69_DLL1_DLL1	14	Inverse variance weighted	0.467634	0.160782	1.59621	1.16474	2.18752	0.00363165
5486_73_ICAM2_sICAM_2	14	Inverse variance weighted	0.408171	0.141315	1.50406	1.14019	1.98407	0.00387229
5491_12_SPOCK2_Testican_2	47	Inverse variance weighted	0.205713	0.0939679	1.2284	1.02177	1.47682	0.0285836
5526_53_TNFRSF18_GITR	16	Inverse variance weighted	-0.381263	0.15347	0.682998	0.505572	0.922691	0.0129814
5602_62_RNASE10_RNS10	9	Inverse variance weighted	-0.495927	0.21432	0.609006	0.400119	0.926945	0.0206698
5614_44_CRH_CRH	3	Inverse variance weighted	-0.88719	0.391595	0.411811	0.191146	0.887219	0.0234771
5618_50_FAM3B_FAM3B	24	Inverse variance weighted	-0.24266	0.103692	0.784538	0.64025	0.961343	0.0192733
5639_49_NETO1_NETO1	11	Inverse variance weighted	-0.42503	0.199145	0.65375	0.442483	0.965889	0.03282
5646_20_RNASE6_RNAS6	201	Inverse variance weighted	-0.060333	0.0281914	0.941451	0.890842	0.994935	0.0323449
5660_51_SOD3_SOD3	182	Inverse variance weighted	-0.0535002	0.0260725	0.947906	0.900683	0.997605	0.0401713
5677_15_C2orf66_CB066	12	Inverse variance weighted	0.309285	0.152133	1.36245	1.01117	1.83577	0.042054
5689_1_DEFB112_DB112	53	Inverse variance weighted	0.152623	0.0679495	1.16489	1.01963	1.33083	0.0246965
5701_81_CLEC3B_Tetranectin	21	Inverse variance weighted	0.422472	0.13106	1.52573	1.18009	1.97259	0.00126633
5708_1_LEAP2_LEAP2	50	Inverse variance weighted	-0.241684	0.0761353	0.785305	0.676442	0.911687	0.0015015
5714_88_IFNA6_IFNA6	8	Inverse variance weighted	-0.552665	0.24816	0.575414	0.353788	0.935876	0.0259436
5748_20_ASAH1_Acid_ceramidase	5	Inverse variance weighted	0.583534	0.285629	1.79236	1.02398	3.13731	0.0410544
5754_76_INSL6_INSL6	7	Inverse variance weighted	-0.729417	0.338808	0.48219	0.24821	0.936737	0.0313273
5763_67_DEFB104A_HBD_4	42	Inverse variance weighted	0.354435	0.135724	1.42538	1.09244	1.85977	0.00901613
5810_25_TDGF1_Cripto	642	Inverse variance weighted	0.0576116	0.0158255	1.0593	1.02695	1.09268	0.000272196
5822_22_GDNF_GDNF	3	Inverse variance weighted	-0.790647	0.367884	0.453551	0.220535	0.932772	0.0316205
5843_60_EHMT2_NG36	33	Inverse variance weighted	0.171315	0.087183	1.18686	1.00044	1.40803	0.0494135
5879_51_DCTN2_Dynactin_subunit_2	7	Inverse variance weighted	-0.433795	0.194669	0.648045	0.442487	0.949097	0.0258555
5954_62_PTH_PTH	16	Inverse variance weighted	-0.282657	0.135105	0.753778	0.578415	0.982307	0.0364268
6069_71_SUMF2_SUMF2	17	Inverse variance weighted	-0.49311	0.207949	0.610724	0.406289	0.918025	0.0177253
6079_59_ACPL2_ACPL2	21	Inverse variance weighted	-0.327999	0.135446	0.720364	0.552406	0.939389	0.0154511
6119_14_MAMDC2_MAMC2	6	Inverse variance weighted	-0.892482	0.417637	0.409638	0.180676	0.928751	0.0325994
6245_4_PVRL2_Nectin_2	23	Inverse variance weighted	-0.353969	0.165852	0.701897	0.507104	0.971515	0.0328229
6273_58_LEPRE1_P3H1	14	Inverse variance weighted	-0.416919	0.188648	0.659075	0.455359	0.953927	0.0271027
6276_16_FURIN_Furin	12	Inverse variance weighted	-0.581931	0.249264	0.558818	0.342841	0.910854	0.0195647
6281_51_ST3GAL2_SIA4B	3	Inverse variance weighted	0.854651	0.425461	2.35055	1.02096	5.41166	0.0445622
6359_50_POMGNT2_AGO61	105	Inverse variance weighted	0.15128	0.0501079	1.16332	1.0545	1.28337	0.00253539
6360_7_DEFB128_DB128	19	Inverse variance weighted	-0.386649	0.184068	0.679329	0.473586	0.974456	0.035678
6364_7_TAPBPL_TPSNR	522	Inverse variance weighted	-0.0515627	0.0159573	0.949744	0.920499	0.979918	0.00123232
6366_38_TXNDC15_TXD15	173	Inverse variance weighted	-0.146715	0.0311389	0.86354	0.812412	0.917885	2.46E-06
6373_54_SEMG2_SEMG2	94	Inverse variance weighted	-0.126801	0.0451006	0.880909	0.806382	0.962324	0.00493094
6380_23_ICT1_ICT1	72	Inverse variance weighted	0.196316	0.0681254	1.21691	1.0648	1.39075	0.00395558
6384_19_WFDC3_WFDC3	4	Inverse variance weighted	0.597871	0.305019	1.81824	1.00003	3.3059	0.0499826
6399_52_DEFB107A_D107A	7	Inverse variance weighted	-0.863507	0.340795	0.421681	0.216219	0.822383	0.0112832
6402_8_PILRA_PILRA_isoform_FDF03_deltaTM	545	Inverse variance weighted	-0.0544331	0.0152994	0.947022	0.919045	0.97585	0.000373905
6411_58_DEFB135_DB135	26	Inverse variance weighted	-0.303631	0.144617	0.738133	0.555948	0.980022	0.0357689
6451_64_ASPN_ASPN	121	Inverse variance weighted	0.133749	0.0480981	1.14311	1.04027	1.25611	0.00542339
6471_53_CFHR4_FHR4	674	Inverse variance weighted	-0.0325113	0.0148434	0.968011	0.940255	0.996588	0.0285035
6496_60_DLK1_DLK1	86	Inverse variance weighted	-0.120666	0.0463264	0.88633	0.809397	0.970576	0.00919587
6510_56_RNF128_RN128	22	Inverse variance weighted	-0.355486	0.162183	0.700833	0.50999	0.963091	0.0283879
6511_17_FAM19A4_F19A4	4	Inverse variance weighted	-0.68966	0.322892	0.501746	0.266461	0.94479	0.0326887
6543_182_PRLH_PRRP	10	Inverse variance weighted	-0.509767	0.248237	0.600635	0.369239	0.977045	0.0400193
6597_24_FAM174A_TM157	50	Inverse variance weighted	-0.189649	0.0642589	0.82725	0.729354	0.938285	0.00316414
6600_70_RELL2_RELL2	10	Inverse variance weighted	-0.431535	0.19686	0.649511	0.441586	0.955339	0.0283732
6603_18_KAL1_KALM	75	Inverse variance weighted	0.121203	0.0481295	1.12885	1.02723	1.24053	0.0117935
6604_59_NDNF_CD031	12	Inverse variance weighted	-0.505369	0.210676	0.603283	0.3992	0.911699	0.0164488
6626_81_CHST12_CHSTC	29	Inverse variance weighted	-0.209261	0.0892047	0.811184	0.681062	0.966166	0.0189839
6649_51_NTN1_NET1	56	Inverse variance weighted	0.117292	0.0591672	1.12445	1.00132	1.26271	0.0474369
6896_3_C1orf162_CA162	35	Inverse variance weighted	-0.253702	0.095546	0.775923	0.64341	0.935726	0.00792403
6904_14_LRRTM2_LRRT2	6	Inverse variance weighted	0.53423	0.255468	1.70613	1.03408	2.81496	0.0365118
6921_24_B4GALT3_B4GT3	8	Inverse variance weighted	-0.637568	0.223589	0.528576	0.341024	0.819276	0.00435108
6986_17_HS3ST3B1_HS3SB	24	Inverse variance weighted	-0.332991	0.146924	0.716777	0.537427	0.95598	0.0234265
7003_4_GALNT10_GLT10	3	Inverse variance weighted	-1.14747	0.515453	0.317438	0.115584	0.87181	0.0260046
7009_8_CD72_CD72	19	Inverse variance weighted	-0.487314	0.159684	0.614274	0.449197	0.840016	0.00227513
7049_2_ADAM23_ADAM_23	249	Inverse variance weighted	-0.0726879	0.0283668	0.929891	0.879601	0.983056	0.0103942
7121_2_SYT7_SYT7	8	Inverse variance weighted	-0.749125	0.31087	0.47278	0.257064	0.869515	0.0159625
7132_55_C1QL4_C1QL4	8	Inverse variance weighted	-0.892846	0.342288	0.409489	0.209354	0.800947	0.00909501
7146_16_PDIA4_PDIA4	10	Inverse variance weighted	-0.647053	0.221992	0.523587	0.338864	0.809007	0.00355974
7156_2_FUT10_FUT10	349	Inverse variance weighted	-0.0875272	0.0259773	0.916194	0.870713	0.96405	0.000753398
7161_25_H6PD_G6PE	342	Inverse variance weighted	0.0756368	0.0224378	1.07857	1.03217	1.12706	0.000749095
7173_141_TMEM132C_T132C	70	Inverse variance weighted	0.147696	0.0627545	1.15916	1.02501	1.31088	0.0185946
7184_13_CEACAM7_CEAM7	53	Inverse variance weighted	0.1726	0.0760767	1.18839	1.02377	1.37948	0.0232828
7244_16_IGFLR1_TM149	80	Inverse variance weighted	-0.150718	0.053223	0.86009	0.774889	0.954659	0.00462838
7249_307_BCL2L10_B2L10	13	Inverse variance weighted	-0.428219	0.206064	0.651669	0.435133	0.97596	0.0377013
7638_30_LMAN2_Lectin__mannose_binding_2	22	Inverse variance weighted	-0.24868	0.114127	0.779829	0.623524	0.975318	0.0293331
7738_299_STX2_STX2	52	Inverse variance weighted	-0.198132	0.0736756	0.820262	0.709968	0.94769	0.00716146
7747_47_NDUFB11_NDUBB	24	Inverse variance weighted	-0.377205	0.15911	0.685775	0.502047	0.93674	0.0177536
7757_5_HLA_DQA2_DQA2	100	Inverse variance weighted	-0.149485	0.0544565	0.861151	0.773972	0.95815	0.00605034
7765_15_ITM2A_ITM2A	19	Inverse variance weighted	-0.396445	0.164002	0.672707	0.487781	0.927742	0.0156352
7785_1_EFNB3_Ephrin_B3	12	Inverse variance weighted	-0.540492	0.208314	0.582462	0.387211	0.876168	0.00946992
7789_182_PRDX4_PRDX4	9	Inverse variance weighted	-0.486292	0.222679	0.614902	0.397427	0.951381	0.0289754
7790_21_LIF_LIF	3	Inverse variance weighted	-0.652852	0.30986	0.520559	0.283604	0.955494	0.0351238
7796_10_CD79A_CD79A	7	Inverse variance weighted	-0.480958	0.242003	0.618191	0.384703	0.993389	0.0468772
7809_22_SPATA9_SPAT9	14	Inverse variance weighted	0.311712	0.146665	1.36576	1.02454	1.82062	0.033559
7818_101_GBP6_GBP6	50	Inverse variance weighted	-0.165375	0.0788908	0.847576	0.726148	0.989309	0.0360602
7826_1_DCLK3_DCLK3	3	Inverse variance weighted	1.08502	0.502205	2.95951	1.10595	7.91963	0.0307326
7842_52_SERF1A_SERF1	13	Inverse variance weighted	-0.50958	0.215836	0.600748	0.393522	0.917098	0.0182278
7863_50_PGRMC1_PGRC1	3	Inverse variance weighted	0.907626	0.433052	2.47843	1.06061	5.79159	0.0360924
7894_155_FGF3_FGF_3	3	Inverse variance weighted	-0.614049	0.296441	0.541155	0.302682	0.967514	0.0383209
7895_108_MRAP_MRAP	13	Inverse variance weighted	-0.436811	0.216084	0.646094	0.42302	0.986801	0.043229
7898_29_MDM1_MDM1	9	Inverse variance weighted	-0.557099	0.235659	0.572869	0.360959	0.909185	0.0180787
7905_30_HP_HPT	397	Inverse variance weighted	-0.069507	0.0212301	0.932854	0.894833	0.97249	0.00106043
7939_1_PQLC2L_CC055	4	Inverse variance weighted	-1.03055	0.369751	0.356811	0.172862	0.736506	0.00531749
7959_34_CDH7_CADH7	116	Inverse variance weighted	-0.122868	0.0525749	0.88438	0.797786	0.980374	0.0194385
7991_54_IQCF1_IQCF1	21	Inverse variance weighted	-0.365824	0.173345	0.693625	0.493822	0.974269	0.0348257
7993_23_ASTL_ASTL	3	Inverse variance weighted	-0.753739	0.318426	0.470604	0.252119	0.878425	0.0179291
8007_19_CTSB_Cathepsin_B	271	Inverse variance weighted	-0.329191	0.0295778	0.719505	0.67898	0.76245	9.00E-29
8008_28_HRK_HRK	12	Inverse variance weighted	-0.487941	0.226022	0.613889	0.394181	0.956056	0.0308638
8009_121_SURF1_SURF1	83	Inverse variance weighted	-0.183126	0.0562694	0.832663	0.745713	0.929751	0.00113611
8018_43_VSIG2_VSIG2	37	Inverse variance weighted	-0.153888	0.0659187	0.857368	0.753453	0.975615	0.0195687
8042_88_SPINK9_ISK9	13	Inverse variance weighted	0.549832	0.174772	1.73296	1.23033	2.44094	0.00165517
8064_125_PVR_Poliovirus_receptor	6	Inverse variance weighted	-0.706097	0.338149	0.493567	0.254394	0.9576	0.0367865
8068_43_KIAA1161_K1161	11	Inverse variance weighted	-0.393099	0.163798	0.674962	0.489611	0.93048	0.0163996
8069_85_CD3E_CD3E	79	Inverse variance weighted	-0.166604	0.0610046	0.846535	0.751132	0.954054	0.0063141
8097_77_LIPN_LIPN	357	Inverse variance weighted	-0.0545346	0.0218741	0.946926	0.907186	0.988406	0.012663
8099_42_SPON2_SPON2	36	Inverse variance weighted	-0.214675	0.075626	0.806804	0.695655	0.935712	0.00453073
8106_15_SSR1_SSRA	9	Inverse variance weighted	-0.737556	0.270832	0.478282	0.281285	0.813243	0.00646334
8220_15_C10orf35_CJ035	29	Inverse variance weighted	0.230518	0.0866238	1.25925	1.06262	1.49227	0.00778777
8250_2_PTPRJ_PTPRJ	30	Inverse variance weighted	-0.224364	0.111064	0.799024	0.642718	0.993345	0.0433704
8253_2_POMGNT1_PMGT1	4	Inverse variance weighted	-0.628674	0.310693	0.533299	0.29007	0.980477	0.043026
8275_31_PEAR1_PEAR1	57	Inverse variance weighted	0.164715	0.0592125	1.17906	1.04986	1.32415	0.00540643
8289_8_GPNMB_GPNMB	46	Inverse variance weighted	0.252866	0.0817573	1.28771	1.09705	1.51151	0.00198223
8296_117_KDELC2_KDEL2	30	Inverse variance weighted	-0.189693	0.0927246	0.827213	0.689745	0.992079	0.0407792
8345_27_GPX7_GPX7	107	Inverse variance weighted	0.0959507	0.0400251	1.1007	1.01766	1.19053	0.0165179
8346_9_DPP7_DPP2	82	Inverse variance weighted	-0.118521	0.0417944	0.888233	0.818373	0.964058	0.00457102
8363_18_KIAA1324L_K132L	14	Inverse variance weighted	-0.409961	0.170171	0.663676	0.475449	0.926422	0.0159914
8376_25_LHB_LSHB	29	Inverse variance weighted	0.159926	0.0803204	1.17342	1.0025	1.37349	0.0464697
8427_118_RSPO3_RSPO3	34	Inverse variance weighted	0.192196	0.0861515	1.21191	1.02361	1.43484	0.0256874
8468_19_KLK3_PSA	3	Inverse variance weighted	0.929425	0.443679	2.53305	1.06164	6.04382	0.0361876
8476_11_CHGA_CgA	26	Inverse variance weighted	0.192725	0.0963956	1.21255	1.0038	1.46471	0.0455749
8479_4_MMP10_MMP_10	156	Inverse variance weighted	0.081599	0.0396822	1.08502	1.00383	1.17278	0.0397521
8686_342_C11orf73_HIKES	3	Inverse variance weighted	-0.721736	0.315335	0.485908	0.2619	0.901515	0.0220917
8773_172_EMILIN3_EMIL3	48	Inverse variance weighted	0.162564	0.070712	1.17652	1.02426	1.35142	0.0215076
8780_2_PCDH10_PCD10	294	Inverse variance weighted	0.0654225	0.0190967	1.06761	1.02839	1.10833	0.000612878
8815_1_OLFML1_OLFL1	9	Inverse variance weighted	-0.49815	0.22011	0.607654	0.394725	0.935444	0.0236242
8828_21_ESRP1_ESRP1	6	Inverse variance weighted	-0.704191	0.320038	0.494508	0.26409	0.925968	0.0277833
8842_16_GRAMD1C_GRM1C	105	Inverse variance weighted	0.141424	0.0462207	1.15191	1.05215	1.26114	0.00221523
8864_59_CENPW_CENPW	5	Inverse variance weighted	-0.752866	0.312472	0.471015	0.255301	0.868993	0.0159794
8877_22_EVA1C_F176C	7	Inverse variance weighted	-0.386758	0.178794	0.679256	0.478454	0.964331	0.03053
8903_1_COX6C_COX6C	68	Inverse variance weighted	-0.149471	0.0677438	0.861163	0.754086	0.983445	0.0273548
8932_1_ENTPD6_ENTP6	18	Inverse variance weighted	-0.590265	0.219989	0.554181	0.360075	0.852922	0.00729302
8945_7_FAM175B_F175B	3	Inverse variance weighted	0.738031	0.34379	2.09181	1.06631	4.10358	0.0318134
8958_51_CHL1_CHL1	59	Inverse variance weighted	0.170068	0.0646034	1.18539	1.0444	1.3454	0.00847609
8974_172_COL15A1_COFA1	28	Inverse variance weighted	0.274845	0.0958078	1.31633	1.09096	1.58824	0.00412147
9005_16_PLXNA1_PLXA1	36	Inverse variance weighted	0.226184	0.0706704	1.25381	1.09163	1.44008	0.00137166
9017_58_LCT_LPH	312	Inverse variance weighted	0.0528324	0.015841	1.05425	1.02202	1.0875	0.000852453
9028_5_MTPAP_PAPD1	12	Inverse variance weighted	-0.530263	0.224539	0.58845	0.378947	0.913778	0.0181979
9039_47_TOR1AIP1_TOIP1	104	Inverse variance weighted	-0.165248	0.0586821	0.847684	0.755584	0.95101	0.00486278
9060_27_IGSF9B_TUTLB	6	Inverse variance weighted	-0.556939	0.256797	0.57296	0.346365	0.947795	0.0300986
9076_25_PENK_PENK	185	Inverse variance weighted	-0.0847449	0.0314235	0.918747	0.863868	0.977111	0.0069995
9092_33_ANGPTL1_ANGL1	27	Inverse variance weighted	-0.294243	0.124847	0.745095	0.583365	0.951663	0.0184313
9095_5_MTFR1_MTFR1	8	Inverse variance weighted	-0.297139	0.124646	0.742941	0.581907	0.948538	0.0171316
9100_32_C5orf46_CE046	12	Inverse variance weighted	0.468561	0.165553	1.59769	1.15497	2.21012	0.00465086
9128_34_FLRT3_FLRT3	15	Inverse variance weighted	-0.375591	0.173189	0.686883	0.489172	0.964504	0.0301067
9172_69_MMP8_MMP_8	54	Inverse variance weighted	-0.285786	0.073478	0.751423	0.650637	0.867822	0.00010049
9177_6_FAM3B_FAM3B	89	Inverse variance weighted	-0.113441	0.0530997	0.892757	0.804515	0.990679	0.0326493
9185_15_TFF1_TFF1	69	Inverse variance weighted	0.110422	0.0559343	1.11675	1.00079	1.24614	0.0483656
9215_117_USP25_UBP25	82	Inverse variance weighted	0.265511	0.0567862	1.3041	1.16674	1.45763	2.93E-06
9221_6_ITPRIPL1_IPIL1	18	Inverse variance weighted	-0.333605	0.109378	0.716337	0.578113	0.887609	0.00228828
9237_54_ACP2_Lysosomal_acid_phosphatase	56	Inverse variance weighted	0.164976	0.0682622	1.17936	1.03167	1.3482	0.0156578
9256_78_NPTX1_NPTX1	115	Inverse variance weighted	0.136607	0.0500752	1.14638	1.03921	1.2646	0.00637143
9276_7_CPA2_CBPA2	16	Inverse variance weighted	-0.459353	0.198805	0.631693	0.427838	0.932679	0.020857
9288_7_FKBP7_FKBP7	63	Inverse variance weighted	0.161496	0.0606623	1.17527	1.04352	1.32365	0.00776272
9290_8_RMDN3_RMD3	3	Inverse variance weighted	-0.748779	0.356259	0.472944	0.235264	0.950743	0.0355723
9294_45_MFAP2_MFAP2	29	Inverse variance weighted	0.261103	0.103611	1.29836	1.05974	1.59071	0.0117343
9306_7_DEFB118_DB118	3	Inverse variance weighted	-0.622078	0.290042	0.536828	0.304051	0.947816	0.0319702
9321_400_NMB_NMB	24	Inverse variance weighted	0.304277	0.123688	1.35564	1.0638	1.72755	0.0138925
9337_43_TAC1_TKN1	30	Inverse variance weighted	0.256043	0.0919357	1.29181	1.0788	1.54688	0.00535234
9343_16_IL2RB_IL_2_sRb	36	Inverse variance weighted	0.25498	0.100948	1.29044	1.05879	1.57277	0.0115414
9369_174_LRRC4C_NGL1	20	Inverse variance weighted	-0.300066	0.126648	0.740769	0.577934	0.949484	0.017822
9444_70_DGCR6_DGCR6	13	Inverse variance weighted	-0.388771	0.187161	0.677889	0.469725	0.978304	0.0377835
9470_15_METTL24_MET24	15	Inverse variance weighted	0.306352	0.132069	1.35846	1.04864	1.75981	0.020361
9487_60_GHRH_Growth_hormone_releasing_factor	15	Inverse variance weighted	-0.388537	0.182807	0.678048	0.473863	0.970217	0.0335535
9522_3_AIFM1_AIF	14	Inverse variance weighted	-0.45197	0.183772	0.636373	0.443897	0.912308	0.0139166
9526_3_CLPSL1_COLL1	124	Inverse variance weighted	0.114557	0.0361656	1.12138	1.04464	1.20375	0.00153717
9578_263_MANSC4_MANS4	96	Inverse variance weighted	0.0960328	0.0456407	1.1008	1.0066	1.20381	0.0353695
9583_17_RNF24_RNF24	42	Inverse variance weighted	0.200995	0.0723101	1.22262	1.06106	1.40878	0.00544225
9772_153_NLGN2_NLGN2	17	Inverse variance weighted	0.360089	0.167889	1.43346	1.03151	1.99203	0.0319686
9783_75_DNAJC11_DJC11	7	Inverse variance weighted	-0.624264	0.279937	0.535655	0.309456	0.927198	0.0257463
9816_37_ISOC1_ISOC1	25	Inverse variance weighted	-0.284673	0.106074	0.75226	0.611049	0.926105	0.00728084
9842_2_CTNNB1_b_Catenin	182	Inverse variance weighted	-0.0792022	0.0315168	0.923853	0.868511	0.982722	0.0119703
9870_17_WARS_SYWC	20	Inverse variance weighted	-0.215757	0.100262	0.805931	0.662145	0.98094	0.0314021
9896_21_FOXG1_FOXGB	20	Inverse variance weighted	-0.359545	0.169687	0.697994	0.500508	0.973403	0.034102
9931_20_KRT1_Keratin_1	14	Inverse variance weighted	-0.682915	0.213418	0.505142	0.332467	0.767501	0.0013748
9942_2_NXT1_NXT1	24	Inverse variance weighted	0.249616	0.0987329	1.28353	1.0577	1.55758	0.011465
9955_40_RNF148_RN148	3	Inverse variance weighted	-0.814416	0.359689	0.442898	0.218842	0.896348	0.0235603
9956_7_ADAM15_ADA15	10	Inverse variance weighted	-0.527408	0.235277	0.590133	0.372116	0.935882	0.0249841
9959_60_TMEM59L_TM59L	17	Inverse variance weighted	-0.302982	0.150958	0.738612	0.549438	0.992921	0.0447429
9969_8_SLC22A16_S22AG	89	Inverse variance weighted	-0.152105	0.0581804	0.858898	0.766333	0.962644	0.00893934
9986_14_NPW_Neuropeptide_W	68	Inverse variance weighted	-0.233026	0.058144	0.792133	0.706813	0.887751	6.13E-05
