# Supplementary material for: Integrated multi-omics reveals the ITGB2-IL2RB-NK axis in promoting papillary thyroid carcinoma progression and immune microenvironment crosstalk
Source: Research Square preprint supplement (doi:10.21203/rs.3.rs-7218110/v1), 2025-08-21
Supplement: Supplementary file 2 [file ce75911018f96480dcc3652e.xlsx]

## Sheet: Sheet1
TableS6 Two-Step Mediation Analysis of Causal Effects Between Upstream and Downstream PTC-Associated Proteins in papillary thyroid carcinoma.
id2	id	nsnp.x	method.x	b.x	se.x	or.x	or_lci95.x	or_uci95.x	pvalue.x	nsnp.y	method.y	b.y	se.y	or.y	or_lci95.y	or_uci95.y	pvalue.y	nsnp	method	b	se	or	or_lci95	or_uci95	pvalue	beta_all	beta1	beta2	beta12	beta_dir	lci	uci	beta12_p	lci_p	uci_p
8064_125_PVR_Poliovirus_receptor	ITIH4_Q14624_OID30762_v1_Inflammation_II	43	Inverse variance weighted	-0.161842	0.0737425	0.850576	0.736109	0.982842	0.0281859	43	Inverse variance weighted	0.226735	0.0275875	1.2545	1.18847	1.3242	2.06e-16	6	Inverse variance weighted	-0.706097	0.238847956802017	0.493567	0.254394	0.9576	0.0367865	-0.161842	0.226735	-0.706097	-0.160097	-0.00174478	-0.628239	0.308044927656197	0.989219214163437	3.88180846306262	-1.90337
12560_9_NT5C_NT5C	NT5C_Q8TCD5_OID30294_v1_Cardiometabolic_II	35	Inverse variance weighted	-0.189963	0.0722144	0.826989	0.717844	0.952731	0.00852475	29	Inverse variance weighted	0.85889	0.0675894	2.36054	2.06765	2.69491	5.37e-37	36	Inverse variance weighted	-0.185497	0.0590241102942411	0.830692	0.742131	0.92982	0.00125934	-0.189963	0.85889	-0.185497	-0.159321	-0.0306423	-0.275008	-0.0436339	0.838693939722716	1.44769147703131	0.229696402414126
17224_12_OGN_MIME	OGN_P20774_OID21123_v1_Neurology	87	Inverse variance weighted	-0.147658	0.0452421	0.862726	0.789518	0.942722	0.00109951	82	Inverse variance weighted	0.682983	0.0190865	1.97978	1.90708	2.05524	1.99e-280	85	Inverse variance weighted	-0.172159	0.0167398719944019	0.841845	0.746976	0.948763	0.00476939	-0.147658	0.682983	-0.172159	-0.117582	-0.0300765	-0.150392	-0.0847718	0.796310273942483	1.01851325956517	0.574107288319793
8064_125_PVR_Poliovirus_receptor	PI16_Q6UXB8_OID30676_v1_Inflammation_II	76	Inverse variance weighted	-0.111142	0.055674	0.894812	0.802308	0.997981	0.0459018	76	Inverse variance weighted	0.115005	0.0196289	1.12188	1.07954	1.16588	4.66e-09	6	Inverse variance weighted	-0.706097	0.238776709126693	0.493567	0.254394	0.9576	0.0367865	-0.111142	0.115005	-0.706097	-0.0812048	-0.029937	-0.549207	0.386797552258172	0.730641559594222	4.94150073042261	-3.48022
8932_1_ENTPD6_ENTP6	ENTPD6_O75354_OID20100_v1_Cardiometabolic	105	Inverse variance weighted	-0.148172	0.0388169	0.862283	0.799113	0.930447	0.000134981	111	Inverse variance weighted	0.158145	0.0109133	1.17134	1.14655	1.19666	1.38e-47	18	Inverse variance weighted	-0.590265	0.129862986138033	0.554181	0.360075	0.852922	0.00729302	-0.148172	0.158145	-0.590265	-0.0933476	-0.054824	-0.347879	0.161183861715771	0.629996439296289	2.34781161864028	-1.08782
5337_64_CD86_B7_2	MSR1_P21757_OID21063_v1_Neurology	90	Inverse variance weighted	0.134499	0.0622835	1.14396	1.0125	1.2925	0.0308138	96	Inverse variance weighted	0.149384	0.0261634	1.16112	1.10308	1.22221	1.13e-08	10	Inverse variance weighted	0.562248	0.127040293771029	1.75461	1.12704	2.73164	0.0127907	0.134499	0.149384	0.562248	0.0839911036973206	0.0505081253026794	-0.165008	0.332990079488538	0.624472752162175	-1.22683	2.47577686477696
9343_16_IL2RB_IL_2_sRb	ITGB2_P05107_OID20315_v1_Cardiometabolic	53	Inverse variance weighted	0.214538	0.0900278	1.23929	1.03882	1.47845	0.0171713	52	Inverse variance weighted	0.524528	0.0790887	1.68966	1.44703	1.97297	3.31e-11	36	Inverse variance weighted	0.25498	0.0488207760258009	1.29044	1.05879	1.57277	0.0115414	0.214538	0.524528	0.25498	0.133744150918767	0.0807938590812327	0.0380554299081976	0.229432871929337	0.623405385920972	0.177383158854683	1.06942761298726
12781_2_TARBP2_TRBP2	PDLIM7_Q9NR12_OID20729_v1_Inflammation	6	Inverse variance weighted	-0.666372	0.299942	0.513569	0.285287	0.924516	0.0263059	6	Inverse variance weighted	0.389306	0.189976	1.47596	1.0171	2.14183	0.0404385	3	Inverse variance weighted	-1.04794	0.556731245530122	0.35066	0.124932	0.984237	0.0465717	-0.666372	0.389306	-1.04794	-0.407969	-0.258403	-1.49916	0.683224702398902	0.612223870378815	2.24973874194676	-1.02529
19361_78_MATN3_MATN3	MATN3_O15232_OID20979_v1_Neurology	89	Inverse variance weighted	-0.0841588	0.0386753	0.919285	0.852176	0.99168	0.0295529	82	Inverse variance weighted	0.984875	0.0425263	2.67748	2.46335	2.91021	1.17e-118	296	Inverse variance weighted	-0.0522868	0.0419018703968798	0.949057	0.905498	0.99471	0.0291642	-0.0841588	0.984875	-0.0522868	-0.051496	-0.0326628	-0.133624	0.0306317093127998	0.611890469910611	1.58775613747558	-0.363975
6119_14_MAMDC2_MAMC2	TSC1_Q92574_OID30478_v1_Inflammation_II	7	Inverse variance weighted	-0.535904	0.247104	0.58514	0.360513	0.949728	0.0301026	8	Inverse variance weighted	0.362014	0.0702404	1.43622	1.2515	1.6482	2.55e-07	6	Inverse variance weighted	-0.892482	0.373599916415043	0.409638	0.180676	0.928751	0.0325994	-0.535904	0.362014	-0.892482	-0.323091	-0.212813	-1.05535	0.409164576005292	0.602890061762844	1.96928346425544	-0.763503
3432_21_EPHA3_EPHA3	TSC1_Q92574_OID30478_v1_Inflammation_II	7	Inverse variance weighted	-0.535904	0.247104	0.58514	0.360513	0.949728	0.0301026	8	Inverse variance weighted	0.318586	0.0664333	1.37518	1.20729	1.56642	1.62e-06	3	Inverse variance weighted	-0.97558	0.412988334730055	0.376974	0.164605	0.863336	0.0210218	-0.535904	0.318586	-0.97558	-0.310806	-0.225098	-1.12026	0.498651015070237	0.579965924763233	2.09041737586754	-0.930486
11358_15_GRB10_GRB10	PDLIM7_Q9NR12_OID20729_v1_Inflammation	6	Inverse variance weighted	-0.666372	0.299942	0.513569	0.285287	0.924516	0.0263059	6	Inverse variance weighted	0.764966	0.330941	2.14892	1.12336	4.11077	0.0208058	7	Inverse variance weighted	-0.48913	0.274782096108753	0.61316	0.399607	0.940837	0.0251441	-0.666372	0.764966	-0.48913	-0.374168	-0.292204	-0.912741	0.164405306284251	0.561500007261573	1.36971720798693	-0.246717
13056_18_SLC6A16_S6A16	TSC1_Q92574_OID30478_v1_Inflammation_II	7	Inverse variance weighted	-0.535904	0.247104	0.58514	0.360513	0.949728	0.0301026	8	Inverse variance weighted	0.39467	0.0641402	1.48389	1.3086	1.68267	7.59e-10	9	Inverse variance weighted	-0.756233	0.245997937994499	0.469432	0.24897	0.885112	0.0194301	-0.535904	0.39467	-0.756233	-0.298462	-0.237442	-0.780618	0.183693682890233	0.55693224157169	1.45663790191517	-0.342773
17427_26_NLGN3_NLGN3	TSC1_Q92574_OID30478_v1_Inflammation_II	7	Inverse variance weighted	-0.535904	0.247104	0.58514	0.360513	0.949728	0.0301026	8	Inverse variance weighted	0.285373	0.0862934	1.33026	1.12326	1.5754	0.000942991	3	Inverse variance weighted	-1.04357	0.510243291009072	0.352194	0.13523	0.917257	0.0326103	-0.535904	0.285373	-1.04357	-0.297807	-0.238097	-1.29788	0.702269851596955	0.555709491475918	2.42185837392473	-1.31044
5070_76_TNFRSF6B_DcR3	LTB_Q06643_OID31383_v1_Oncology_II	65	Inverse variance weighted	0.203691	0.0727948	1.22592	1.06291	1.41392	0.00513951	77	Inverse variance weighted	-0.118117	0.018656	0.888592	0.856687	0.921686	2.43e-10	5	Inverse variance weighted	-0.942219	0.304135982757148	0.389762	0.207036	0.73376	0.00351053	0.203691	-0.118117	-0.942219	0.11129175717917	0.0923996598208296	-0.484815	0.707398283383181	0.546374308835852	-2.38014	3.47289195490835
7939_1_PQLC2L_CC055	ITIH4_Q14624_OID30762_v1_Inflammation_II	43	Inverse variance weighted	-0.161842	0.0737425	0.850576	0.736109	0.982842	0.0281859	43	Inverse variance weighted	0.0848529	0.0189989	1.08856	1.04877	1.12986	7.96e-06	4	Inverse variance weighted	-1.03055	0.38105071069689	0.356811	0.172862	0.736506	0.00531749	-0.161842	0.0848529	-1.03055	-0.0874451	-0.0743967	-0.834305	0.659414268796038	0.54031218853385	5.15506043174724	-4.07444
7939_1_PQLC2L_CC055	TSC1_Q92574_OID30478_v1_Inflammation_II	7	Inverse variance weighted	-0.535904	0.247104	0.58514	0.360513	0.949728	0.0301026	8	Inverse variance weighted	0.275625	0.0731112	1.31735	1.14148	1.52032	0.000163286	4	Inverse variance weighted	-1.03055	0.381579766790567	0.356811	0.172862	0.736506	0.00531749	-0.535904	0.275625	-1.03055	-0.284045	-0.251859	-1.03194	0.463851118653534	0.530029944808722	1.92560861856856	-0.865549
7003_4_GALNT10_GLT10	TSC1_Q92574_OID30478_v1_Inflammation_II	7	Inverse variance weighted	-0.535904	0.247104	0.58514	0.360513	0.949728	0.0301026	8	Inverse variance weighted	0.242968	0.0612972	1.27503	1.13069	1.43779	7.38e-05	3	Inverse variance weighted	-1.14747	0.591656364029536	0.317438	0.115584	0.87181	0.0260046	-0.535904	0.242968	-1.14747	-0.278799	-0.257105	-1.43845	0.880847674782975	0.520240086002767	2.68414675951122	-1.64367
17712_7_IDI1_IDI1	SLMAP_Q14BN4_OID31441_v1_Oncology_II	4	Inverse variance weighted	-1.26651	0.364859	0.281812	0.137843	0.576148	0.00051806	4	Inverse variance weighted	0.824899	0.348362	2.28165	1.1527	4.51627	0.0178875	5	Inverse variance weighted	-0.793232	0.371239312301716	0.45238	0.253098	0.808572	0.0074256	-1.26651	0.824899	-0.793232	-0.654336	-0.612179	-1.38197	0.0732928397994476	0.516643132447944	1.09115596800494	-0.0578697
7003_4_GALNT10_GLT10	KDM3A_Q9Y4C1_OID30426_v1_Inflammation_II	15	Inverse variance weighted	-0.482031	0.205717	0.617528	0.412617	0.9242	0.0191202	18	Inverse variance weighted	0.216788	0.0481327	1.24208	1.13026	1.36496	6.67e-06	3	Inverse variance weighted	-1.14747	0.591560922932148	0.317438	0.115584	0.87181	0.0260046	-0.482031	0.216788	-1.14747	-0.248759	-0.233272	-1.40822	0.910700844713993	0.516063608200438	2.92142725060614	-1.8893
5337_64_CD86_B7_2	ITGB2_P05107_OID20315_v1_Cardiometabolic	53	Inverse variance weighted	0.214538	0.0900278	1.23929	1.03882	1.47845	0.0171713	52	Inverse variance weighted	0.196412	0.0371538	1.21703	1.13155	1.30896	1.25e-07	10	Inverse variance weighted	0.562248	0.127189676120942	1.75461	1.12704	2.73164	0.0127907	0.214538	0.196412	0.562248	0.110432456657197	0.104105553342803	-0.138859	0.359724221854243	0.514745413445371	-0.647248	1.67673887650138
13565_2_RBL2_p130	ITIH4_Q14624_OID30762_v1_Inflammation_II	43	Inverse variance weighted	-0.161842	0.0737425	0.850576	0.736109	0.982842	0.0281859	43	Inverse variance weighted	0.879291	0.0977937	2.40919	1.98897	2.9182	2.44e-19	151	Inverse variance weighted	-0.0945989	0.0860754836012027	0.909738	0.839928	0.985349	0.0202156	-0.161842	0.879291	-0.0945989	-0.08318	-0.0786619	-0.251888	0.0855279896150994	0.513958276201476	1.5563830128092	-0.528466
17857_6_ACADL_ACADL	TSC1_Q92574_OID30478_v1_Inflammation_II	7	Inverse variance weighted	-0.535904	0.247104	0.58514	0.360513	0.949728	0.0301026	8	Inverse variance weighted	0.377157	0.091534	1.45813	1.21866	1.74467	3.78e-05	8	Inverse variance weighted	-0.72782	0.182843398928144	0.482961	0.297793	0.783265	0.00317572	-0.535904	0.377157	-0.72782	-0.274502	-0.261402	-0.632875	0.0838709715634011	0.512222404624641	1.18094850173433	-0.156504
17427_26_NLGN3_NLGN3	KDM3A_Q9Y4C1_OID30426_v1_Inflammation_II	15	Inverse variance weighted	-0.482031	0.205717	0.617528	0.412617	0.9242	0.0191202	18	Inverse variance weighted	0.234088	0.0525485	1.26376	1.14007	1.40086	8.4e-06	3	Inverse variance weighted	-1.04357	0.509797116765814	0.352194	0.13523	0.917257	0.0326103	-0.482031	0.234088	-1.04357	-0.244288	-0.237743	-1.24349	0.754914477515019	0.506788904796536	2.57969027832488	-1.56611
13056_18_SLC6A16_S6A16	KDM3A_Q9Y4C1_OID30426_v1_Inflammation_II	15	Inverse variance weighted	-0.482031	0.205717	0.617528	0.412617	0.9242	0.0191202	18	Inverse variance weighted	0.3082	0.0567187	1.36097	1.21778	1.521	5.52e-08	9	Inverse variance weighted	-0.756233	0.245315613226159	0.469432	0.24897	0.885112	0.0194301	-0.482031	0.3082	-0.756233	-0.233071	-0.24896	-0.713889	0.247747772562189	0.483518521411313	1.48100370695043	-0.513967
3432_21_EPHA3_EPHA3	KDM3A_Q9Y4C1_OID30426_v1_Inflammation_II	15	Inverse variance weighted	-0.482031	0.205717	0.617528	0.412617	0.9242	0.0191202	18	Inverse variance weighted	0.238429	0.0509003	1.26925	1.14874	1.40241	2.81e-06	3	Inverse variance weighted	-0.97558	0.412624168488112	0.376974	0.164605	0.863336	0.0210218	-0.482031	0.238429	-0.97558	-0.232606	-0.249424	-1.04135	0.576136905276166	0.482555171390355	2.16033870032881	-1.19523
8064_125_PVR_Poliovirus_receptor	MME_P08473_OID21307_v1_Oncology	89	Inverse variance weighted	-0.142375	0.0482966	0.867296	0.788962	0.953406	0.00319901	84	Inverse variance weighted	0.0963098	0.0190318	1.1011	1.06078	1.14295	4.18e-07	6	Inverse variance weighted	-0.706097	0.23877307338949	0.493567	0.254394	0.9576	0.0367865	-0.142375	0.0963098	-0.706097	-0.0680041	-0.0743714	-0.535999	0.399991156435882	0.477639086135522	3.76468969287085	-2.80941
6119_14_MAMDC2_MAMC2	KDM3A_Q9Y4C1_OID30426_v1_Inflammation_II	15	Inverse variance weighted	-0.482031	0.205717	0.617528	0.412617	0.9242	0.0191202	18	Inverse variance weighted	0.250837	0.0521524	1.2851	1.16023	1.42341	1.51e-06	6	Inverse variance weighted	-0.892482	0.372963061585701	0.409638	0.180676	0.928751	0.0325994	-0.482031	0.250837	-0.892482	-0.223867	-0.258164	-0.954875	0.507140287807665	0.464425309776476	1.98094162030611	-1.05209
3181_50_CTSS_Cathepsin_S	CTSS_P25774_OID21056_v1_Neurology	78	Inverse variance weighted	0.114795	0.0524997	1.12164	1.01197	1.24321	0.0287721	73	Inverse variance weighted	0.430952	0.065081	1.53872	1.35445	1.74807	3.55e-11	63	Inverse variance weighted	0.121759	0.0290434278888746	1.12948	1.00034	1.2753	0.0493662	0.114795	0.430952	0.121759	0.0524721539821494	0.0623233310178506	-0.00445296	0.109397272644344	0.457092489152769	-0.0387904	0.952975394845395
5070_76_TNFRSF6B_DcR3	KDM3A_Q9Y4C1_OID30426_v1_Inflammation_II	15	Inverse variance weighted	-0.482031	0.205717	0.617528	0.412617	0.9242	0.0191202	18	Inverse variance weighted	0.233436	0.0488273	1.26293	1.14767	1.38977	1.75e-06	5	Inverse variance weighted	-0.942219	0.304341512483565	0.389762	0.207036	0.73376	0.00351053	-0.482031	0.233436	-0.942219	-0.219948	-0.262083	-0.816458	0.376561086196984	0.456295052401013	1.6937872203661	-0.781197
15666_21_BMP2_BMP_2	TSC1_Q92574_OID30478_v1_Inflammation_II	7	Inverse variance weighted	-0.535904	0.247104	0.58514	0.360513	0.949728	0.0301026	8	Inverse variance weighted	0.330116	0.0785749	1.39113	1.19257	1.62275	2.65e-05	4	Inverse variance weighted	-0.739879	0.274130718687927	0.477172	0.231583	0.9832	0.0448632	-0.535904	0.330116	-0.739879	-0.244246	-0.291658	-0.781542	0.293050417315319	0.455763984867198	1.45836165413331	-0.546834
3432_21_EPHA3_EPHA3	LTB_Q06643_OID31383_v1_Oncology_II	65	Inverse variance weighted	0.203691	0.0727948	1.22592	1.06291	1.41392	0.00513951	77	Inverse variance weighted	-0.0948585	0.0188504	0.909502	0.876512	0.943733	4.85e-07	3	Inverse variance weighted	-0.97558	0.412449532714322	0.376974	0.164605	0.863336	0.0210218	0.203691	-0.0948585	-0.97558	0.0925420373412772	0.111149379658723	-0.715859	0.900943121461349	0.454324677515878	-3.51443	4.4230784719876
5070_76_TNFRSF6B_DcR3	ITIH4_Q14624_OID30762_v1_Inflammation_II	43	Inverse variance weighted	-0.161842	0.0737425	0.850576	0.736109	0.982842	0.0281859	43	Inverse variance weighted	0.0775791	0.0217541	1.08067	1.03556	1.12774	0.000362212	5	Inverse variance weighted	-0.942219	0.304132682310785	0.389762	0.207036	0.73376	0.00351053	-0.161842	0.0775791	-0.942219	-0.0730965	-0.0887453	-0.669197	0.523003538763288	0.451653997812376	4.13487967355162	-3.23157
7003_4_GALNT10_GLT10	ITIH4_Q14624_OID30762_v1_Inflammation_II	43	Inverse variance weighted	-0.161842	0.0737425	0.850576	0.736109	0.982842	0.0281859	43	Inverse variance weighted	0.0634738	0.0159463	1.06553	1.03274	1.09936	6.88e-05	3	Inverse variance weighted	-1.14747	0.591469753386293	0.317438	0.115584	0.87181	0.0260046	-0.161842	0.0634738	-1.14747	-0.0728345	-0.0890074	-1.23212	1.08644626220036	0.450034737225112	7.61308135734922	-6.71301
5070_76_TNFRSF6B_DcR3	TSC1_Q92574_OID30478_v1_Inflammation_II	7	Inverse variance weighted	-0.535904	0.247104	0.58514	0.360513	0.949728	0.0301026	8	Inverse variance weighted	0.253513	0.0516733	1.28854	1.16443	1.42589	9.29e-07	5	Inverse variance weighted	-0.942219	0.304409997741332	0.389762	0.207036	0.73376	0.00351053	-0.535904	0.253513	-0.942219	-0.238865	-0.297039	-0.835509	0.357778525453473	0.445723529637997	1.55906374812043	-0.667617
9783_75_DNAJC11_DJC11	TSC1_Q92574_OID30478_v1_Inflammation_II	7	Inverse variance weighted	-0.535904	0.247104	0.58514	0.360513	0.949728	0.0301026	8	Inverse variance weighted	0.381515	0.0725135	1.4645	1.27047	1.68816	1.43e-07	7	Inverse variance weighted	-0.624264	0.176930883681755	0.535655	0.309456	0.927198	0.0257463	-0.535904	0.381515	-0.624264	-0.238166	-0.297738	-0.58495	0.108618612277678	0.444418911196295	1.09152074804831	-0.202683
2516_57_CCL21_6Ckine	CCL21_O00585_OID20686_v1_Inflammation	52	Inverse variance weighted	-0.245225	0.0979352	0.782528	0.645856	0.948122	0.0122814	50	Inverse variance weighted	0.797992	0.0952285	2.22108	1.84291	2.67685	5.3e-17	107	Inverse variance weighted	-0.130167	0.0762071460490601	0.877948	0.805407	0.957024	0.00309297	-0.245225	0.797992	-0.130167	-0.103873	-0.141353	-0.253239	0.0454934361917892	0.423580415432632	1.03267784069408	-0.185517
7939_1_PQLC2L_CC055	KDM3A_Q9Y4C1_OID30426_v1_Inflammation_II	15	Inverse variance weighted	-0.482031	0.205717	0.617528	0.412617	0.9242	0.0191202	18	Inverse variance weighted	0.197326	0.0440653	1.21814	1.11735	1.32803	7.53e-06	4	Inverse variance weighted	-1.03055	0.381146497400026	0.356811	0.172862	0.736506	0.00531749	-0.482031	0.197326	-1.03055	-0.203355	-0.278676	-0.950402	0.543692545340219	0.421870513515778	1.97166173828446	-1.12792
8932_1_ENTPD6_ENTP6	TSC1_Q92574_OID30478_v1_Inflammation_II	7	Inverse variance weighted	-0.535904	0.247104	0.58514	0.360513	0.949728	0.0301026	8	Inverse variance weighted	0.379294	0.0949776	1.46125	1.21305	1.76024	6.51e-05	18	Inverse variance weighted	-0.590265	0.134755975615165	0.554181	0.360075	0.852922	0.00729302	-0.535904	0.379294	-0.590265	-0.223884	-0.31202	-0.488005	0.0402380611823899	0.417768119517944	0.91062068167553	-0.0750844
17857_6_ACADL_ACADL	KDM3A_Q9Y4C1_OID30426_v1_Inflammation_II	15	Inverse variance weighted	-0.482031	0.205717	0.617528	0.412617	0.9242	0.0191202	18	Inverse variance weighted	0.271136	0.0572311	1.31145	1.1723	1.46713	2.16e-06	8	Inverse variance weighted	-0.72782	0.180223990374001	0.482961	0.297793	0.783265	0.00317572	-0.482031	0.271136	-0.72782	-0.197339	-0.284692	-0.550578	0.155900517221436	0.409389806053491	1.14220398821106	-0.323424
7003_4_GALNT10_GLT10	LTB_Q06643_OID31383_v1_Oncology_II	65	Inverse variance weighted	0.203691	0.0727948	1.22592	1.06291	1.41392	0.00513951	77	Inverse variance weighted	-0.0723084	0.0180444	0.930244	0.897919	0.963733	6.14e-05	3	Inverse variance weighted	-1.14747	0.591470326455015	0.317438	0.115584	0.87181	0.0260046	0.203691	-0.0723084	-1.14747	0.0829719100549348	0.120719506945065	-1.07631	1.24225374990676	0.407341218775727	-5.28402	6.09870444323515
7121_2_SYT7_SYT7	TSC1_Q92574_OID30478_v1_Inflammation_II	7	Inverse variance weighted	-0.535904	0.247104	0.58514	0.360513	0.949728	0.0301026	8	Inverse variance weighted	0.289972	0.0819115	1.33639	1.13817	1.56913	0.000400033	8	Inverse variance weighted	-0.749125	0.234088725084673	0.47278	0.257064	0.869515	0.0159625	-0.535904	0.289972	-0.749125	-0.217225	-0.318679	-0.676039	0.241588705352979	0.405343405612266	1.26149265913153	-0.450806
6604_59_NDNF_CD031	TSC1_Q92574_OID30478_v1_Inflammation_II	7	Inverse variance weighted	-0.535904	0.247104	0.58514	0.360513	0.949728	0.0301026	8	Inverse variance weighted	0.428081	0.0869582	1.53431	1.29388	1.81942	8.53e-07	12	Inverse variance weighted	-0.505369	0.112789002236524	0.603283	0.3992	0.911699	0.0164488	-0.535904	0.428081	-0.505369	-0.216339	-0.319565	-0.437406	0.00472724390833956	0.403690133457489	0.816201329949563	-0.00882106
5337_64_CD86_B7_2	CEACAM6_P40199_OID30362_v1_Cardiometabolic_II	57	Inverse variance weighted	0.192627	0.0816074	1.21243	1.03322	1.42273	0.0182548	60	Inverse variance weighted	0.137103	0.033292	1.14695	1.0745	1.22428	3.82e-05	10	Inverse variance weighted	0.562248	0.127062169266718	1.75461	1.12704	2.73164	0.0127907	0.192627	0.137103	0.562248	0.0770860761611784	0.115540933838822	-0.171956	0.326127927923946	0.400183111190785	-0.892688	1.69305399032018
12781_2_TARBP2_TRBP2	SLMAP_Q14BN4_OID31441_v1_Oncology_II	4	Inverse variance weighted	-1.26651	0.364859	0.281812	0.137843	0.576148	0.00051806	4	Inverse variance weighted	0.483366	0.171773	1.62152	1.158	2.27059	0.00489315	3	Inverse variance weighted	-1.04794	0.558008622750477	0.35066	0.124932	0.984237	0.0465717	-1.26651	0.483366	-1.04794	-0.506537	-0.759978	-1.60023	0.587159557370293	0.399945830261679	1.26349423555849	-0.463603
13942_140_SPSB1_SPSB1	TSC1_Q92574_OID30478_v1_Inflammation_II	7	Inverse variance weighted	-0.535904	0.247104	0.58514	0.360513	0.949728	0.0301026	8	Inverse variance weighted	0.326837	0.0741595	1.38658	1.199	1.6035	1.05e-05	6	Inverse variance weighted	-0.646916	0.159113762384957	0.523658	0.325183	0.843272	0.00778504	-0.535904	0.326837	-0.646916	-0.211436	-0.324468	-0.523299	0.100427009647166	0.39454066849939	0.976478687262353	-0.187397
7121_2_SYT7_SYT7	ITIH4_Q14624_OID30762_v1_Inflammation_II	43	Inverse variance weighted	-0.161842	0.0737425	0.850576	0.736109	0.982842	0.0281859	43	Inverse variance weighted	0.0821558	0.018631	1.08562	1.0467	1.126	1.04e-05	8	Inverse variance weighted	-0.749125	0.232885628149447	0.47278	0.257064	0.869515	0.0159625	-0.161842	0.0821558	-0.749125	-0.061545	-0.100297	-0.518001	0.394910855683539	0.380278497121582	3.20066043895502	-2.4401
17427_26_NLGN3_NLGN3	LTB_Q06643_OID31383_v1_Oncology_II	65	Inverse variance weighted	0.203691	0.0727948	1.22592	1.06291	1.41392	0.00513951	77	Inverse variance weighted	-0.0739132	0.0194475	0.928752	0.894017	0.964837	0.000144319	3	Inverse variance weighted	-1.04357	0.509650716173966	0.352194	0.13523	0.917257	0.0326103	0.203691	-0.0739132	-1.04357	0.0771337179796797	0.12655769902032	-0.921782	1.07604912168065	0.378679274344091	-4.52538	5.28274159770146
8064_125_PVR_Poliovirus_receptor	TSC1_Q92574_OID30478_v1_Inflammation_II	7	Inverse variance weighted	-0.535904	0.247104	0.58514	0.360513	0.949728	0.0301026	8	Inverse variance weighted	0.28732	0.0744177	1.33285	1.15196	1.54215	0.000112968	6	Inverse variance weighted	-0.706097	0.239721498133582	0.493567	0.254394	0.9576	0.0367865	-0.535904	0.28732	-0.706097	-0.202876	-0.333028	-0.67273	0.266978496028887	0.378567056424767	1.2553174492741	-0.498183
11358_15_GRB10_GRB10	SLMAP_Q14BN4_OID31441_v1_Oncology_II	4	Inverse variance weighted	-1.26651	0.364859	0.281812	0.137843	0.576148	0.00051806	4	Inverse variance weighted	0.978753	0.401769	2.66114	1.2108	5.8487	0.0148463	7	Inverse variance weighted	-0.48913	0.407489871041344	0.61316	0.399607	0.940837	0.0251441	-1.26651	0.978753	-0.48913	-0.478737	-0.787778	-1.27742	0.319942924249899	0.377995736521559	1.00860826465396	-0.252617
13565_2_RBL2_p130	PI16_Q6UXB8_OID30676_v1_Inflammation_II	76	Inverse variance weighted	-0.111142	0.055674	0.894812	0.802308	0.997981	0.0459018	76	Inverse variance weighted	0.444025	0.0741333	1.55897	1.34814	1.80277	2.1e-09	151	Inverse variance weighted	-0.0945989	0.0331418170434961	0.909738	0.839928	0.985349	0.0202156	-0.111142	0.444025	-0.0945989	-0.0420043	-0.0691375	-0.106962	0.0229536975374569	0.377934084655367	0.962394456631913	-0.206526
8064_125_PVR_Poliovirus_receptor	ADAM23_O75077_OID20651_v1_Inflammation	108	Inverse variance weighted	-0.0661019	0.0288822	0.936035	0.884519	0.990552	0.0220985	104	Inverse variance weighted	0.034723	0.00656949	1.03533	1.02209	1.04875	1.25e-07	6	Inverse variance weighted	-0.706097	0.238766146916661	0.493567	0.254394	0.9576	0.0367865	-0.0661019	0.034723	-0.706097	-0.0245178	-0.0415841	-0.492499	0.443463837185167	0.370909185207496	7.45061	-6.70879
6119_14_MAMDC2_MAMC2	ITIH4_Q14624_OID30762_v1_Inflammation_II	43	Inverse variance weighted	-0.161842	0.0737425	0.850576	0.736109	0.982842	0.0281859	43	Inverse variance weighted	0.066536	0.0216289	1.0688	1.02444	1.11508	0.00209618	6	Inverse variance weighted	-0.892482	0.37273634695878	0.409638	0.180676	0.928751	0.0325994	-0.161842	0.066536	-0.892482	-0.0593822	-0.10246	-0.789945	0.671181039763504	0.366914986919046	4.88097139469743	-4.14714
9783_75_DNAJC11_DJC11	KDM3A_Q9Y4C1_OID30426_v1_Inflammation_II	15	Inverse variance weighted	-0.482031	0.205717	0.617528	0.412617	0.9242	0.0191202	18	Inverse variance weighted	0.283053	0.0518218	1.32718	1.19899	1.46906	4.71e-08	7	Inverse variance weighted	-0.624264	0.17536917149117	0.535655	0.309456	0.927198	0.0257463	-0.482031	0.283053	-0.624264	-0.1767	-0.305331	-0.520423	0.167023767401408	0.366573674109231	1.07964753134245	-0.3465
7121_2_SYT7_SYT7	KDM3A_Q9Y4C1_OID30426_v1_Inflammation_II	15	Inverse variance weighted	-0.482031	0.205717	0.617528	0.412617	0.9242	0.0191202	18	Inverse variance weighted	0.234978	0.0515829	1.26488	1.14325	1.39945	5.23e-06	8	Inverse variance weighted	-0.749125	0.233195814576729	0.47278	0.257064	0.869515	0.0159625	-0.482031	0.234978	-0.749125	-0.176028	-0.306003	-0.633092	0.281035786706957	0.365179989660065	1.31338449776681	-0.583025
2833_20_KLK4_Kallikrein_4	TSC1_Q92574_OID30478_v1_Inflammation_II	7	Inverse variance weighted	-0.535904	0.247104	0.58514	0.360513	0.949728	0.0301026	8	Inverse variance weighted	0.333007	0.0620768	1.39516	1.23533	1.57567	8.12e-08	5	Inverse variance weighted	-0.587481	0.152499240781346	0.555725	0.335691	0.919985	0.0223556	-0.535904	0.333007	-0.587481	-0.195635	-0.340269	-0.494534	0.103263152322753	0.365056652959529	0.922802913955132	-0.19269
8253_2_POMGNT1_PMGT1	TSC1_Q92574_OID30478_v1_Inflammation_II	7	Inverse variance weighted	-0.535904	0.247104	0.58514	0.360513	0.949728	0.0301026	8	Inverse variance weighted	0.309873	0.0854935	1.36325	1.15293	1.61194	0.000289497	4	Inverse variance weighted	-0.628674	0.197112894776664	0.533299	0.29007	0.980477	0.043026	-0.535904	0.309873	-0.628674	-0.194809	-0.341095	-0.58115	0.19153213062101	0.363514928504273	1.08442986219457	-0.3574
17857_6_ACADL_ACADL	ITIH4_Q14624_OID30762_v1_Inflammation_II	43	Inverse variance weighted	-0.161842	0.0737425	0.850576	0.736109	0.982842	0.0281859	43	Inverse variance weighted	0.0795374	0.0204833	1.08279	1.04018	1.12714	0.000103157	8	Inverse variance weighted	-0.72782	0.179562106569482	0.482961	0.297793	0.783265	0.00317572	-0.161842	0.0795374	-0.72782	-0.0578889	-0.103953	-0.409831	0.294052815953456	0.357688156201434	2.53229088643583	-1.81691
12781_2_TARBP2_TRBP2	TSC1_Q92574_OID30478_v1_Inflammation_II	7	Inverse variance weighted	-0.535904	0.247104	0.58514	0.360513	0.949728	0.0301026	8	Inverse variance weighted	0.181422	0.0657362	1.19892	1.05399	1.36379	0.0057827	3	Inverse variance weighted	-1.04794	0.551925727533418	0.35066	0.124932	0.984237	0.0465717	-0.535904	0.181422	-1.04794	-0.190119	-0.345785	-1.27189	0.891655302877525	0.354763325387192	2.37336033152191	-1.66383
6119_14_MAMDC2_MAMC2	LTB_Q06643_OID31383_v1_Oncology_II	65	Inverse variance weighted	0.203691	0.0727948	1.22592	1.06291	1.41392	0.00513951	77	Inverse variance weighted	-0.0809488	0.0173453	0.922241	0.891415	0.954133	3.06e-06	6	Inverse variance weighted	-0.892482	0.372736213405315	0.409638	0.180676	0.928751	0.0325994	0.203691	-0.0809488	-0.892482	0.0722453539714498	0.13144606302855	-0.658318	0.802808332245867	0.354680403501979	-3.23194	3.94129681097887
16845_15_MPZL1_MPZL1	LTB_Q06643_OID31383_v1_Oncology_II	65	Inverse variance weighted	0.203691	0.0727948	1.22592	1.06291	1.41392	0.00513951	77	Inverse variance weighted	-0.108013	0.0193926	0.897616	0.864139	0.932391	2.55e-08	6	Inverse variance weighted	-0.661961	0.197543851019802	0.515839	0.287413	0.92581	0.0265324	0.203691	-0.108013	-0.661961	0.0715001413430023	0.132191275656998	-0.315686	0.458686089341814	0.351021866292001	-1.54982	2.25186753618496
7003_4_GALNT10_GLT10	ADAM23_O75077_OID20651_v1_Inflammation	108	Inverse variance weighted	-0.0661019	0.0288822	0.936035	0.884519	0.990552	0.0220985	104	Inverse variance weighted	0.0199115	0.00675588	1.02011	1.00669	1.03371	0.00320579	3	Inverse variance weighted	-1.14747	0.591468902628326	0.317438	0.115584	0.87181	0.0260046	-0.0661019	0.0199115	-1.14747	-0.0228479	-0.043254	-1.18213	1.13643114433276	0.345646592960933	17.8833970698082	-17.1921
5315_22_TNNT2_Troponin_T	TSC1_Q92574_OID30478_v1_Inflammation_II	7	Inverse variance weighted	-0.535904	0.247104	0.58514	0.360513	0.949728	0.0301026	8	Inverse variance weighted	0.38971	0.0924507	1.47655	1.23184	1.76988	2.49e-05	14	Inverse variance weighted	-0.472326	0.0922442808882018	0.62355	0.438364	0.886968	0.00860993	-0.535904	0.38971	-0.472326	-0.18407	-0.351834	-0.364869	-0.0032711	0.343475424942791	0.68084695872892	0.00610389115666304
5070_76_TNFRSF6B_DcR3	ADAM23_O75077_OID20651_v1_Inflammation	108	Inverse variance weighted	-0.0661019	0.0288822	0.936035	0.884519	0.990552	0.0220985	104	Inverse variance weighted	0.024003	0.00682146	1.02429	1.01069	1.03808	0.000433583	5	Inverse variance weighted	-0.942219	0.304128043859351	0.389762	0.207036	0.73376	0.00351053	-0.0661019	0.024003	-0.942219	-0.0226161	-0.0434858	-0.618707	0.573474838730096	0.342140226269843	9.35989538214591	-8.67561
6119_14_MAMDC2_MAMC2	ADAM23_O75077_OID20651_v1_Inflammation	108	Inverse variance weighted	-0.0661019	0.0288822	0.936035	0.884519	0.990552	0.0220985	104	Inverse variance weighted	0.0250549	0.00606262	1.02537	1.01326	1.03763	3.59e-05	6	Inverse variance weighted	-0.892482	0.372733599786681	0.409638	0.180676	0.928751	0.0325994	-0.0661019	0.0250549	-0.892482	-0.022361	-0.0437409	-0.752919	0.708196812258207	0.338281277919942	11.3902720729518	-10.7137
3432_21_EPHA3_EPHA3	ADAM23_O75077_OID20651_v1_Inflammation	108	Inverse variance weighted	-0.0661019	0.0288822	0.936035	0.884519	0.990552	0.0220985	104	Inverse variance weighted	0.0228297	0.0062226	1.02309	1.01069	1.03565	0.000243661	3	Inverse variance weighted	-0.97558	0.412445681074484	0.376974	0.164605	0.863336	0.0210218	-0.0661019	0.0228297	-0.97558	-0.0222722	-0.0438298	-0.830666	0.786121362178204	0.336936829974648	12.5664376672875	-11.8926
13056_18_SLC6A16_S6A16	LTB_Q06643_OID31383_v1_Oncology_II	65	Inverse variance weighted	0.203691	0.0727948	1.22592	1.06291	1.41392	0.00513951	77	Inverse variance weighted	-0.0906995	0.0195536	0.913292	0.878952	0.948973	3.51e-06	9	Inverse variance weighted	-0.756233	0.244698429158517	0.469432	0.24897	0.885112	0.0194301	0.203691	-0.0906995	-0.756233	0.0685899002429021	0.135101516757098	-0.411019	0.548198821393595	0.3367343663916	-2.01785	2.69132018161371
15666_21_BMP2_BMP_2	KDM3A_Q9Y4C1_OID30426_v1_Inflammation_II	15	Inverse variance weighted	-0.482031	0.205717	0.617528	0.412617	0.9242	0.0191202	18	Inverse variance weighted	0.218626	0.0500953	1.24437	1.12799	1.37275	1.28e-05	4	Inverse variance weighted	-0.739879	0.273120446606787	0.477172	0.231583	0.9832	0.0448632	-0.482031	0.218626	-0.739879	-0.161757	-0.320274	-0.697073	0.373558940524885	0.335574258144774	1.44611751209958	-0.774969
5315_22_TNNT2_Troponin_T	KDM3A_Q9Y4C1_OID30426_v1_Inflammation_II	15	Inverse variance weighted	-0.482031	0.205717	0.617528	0.412617	0.9242	0.0191202	18	Inverse variance weighted	0.340705	0.0573289	1.40594	1.25651	1.57313	2.8e-09	14	Inverse variance weighted	-0.472326	0.0871345644345468	0.62355	0.438364	0.886968	0.00860993	-0.482031	0.340705	-0.472326	-0.160924	-0.321107	-0.331707	0.00986004560467096	0.333845252233126	0.688145722671327	-0.0204552
12781_2_TARBP2_TRBP2	ITIH4_Q14624_OID30762_v1_Inflammation_II	43	Inverse variance weighted	-0.161842	0.0737425	0.850576	0.736109	0.982842	0.0281859	43	Inverse variance weighted	0.0510926	0.0207225	1.05242	1.01053	1.09605	0.01368	3	Inverse variance weighted	-1.04794	0.551797879819032	0.35066	0.124932	0.984237	0.0465717	-0.161842	0.0510926	-1.04794	-0.0535419	-0.1083	-1.13507	1.02798196705732	0.330828382077856	7.01342527803093	-6.35177
17712_7_IDI1_IDI1	ADAM23_O75077_OID20651_v1_Inflammation	108	Inverse variance weighted	-0.0661019	0.0288822	0.936035	0.884519	0.990552	0.0220985	104	Inverse variance weighted	0.0272252	0.00695958	1.0276	1.01368	1.04171	9.16e-05	5	Inverse variance weighted	-0.793232	0.23503452755348	0.45238	0.253098	0.808572	0.0074256	-0.0661019	0.0272252	-0.793232	-0.0215959	-0.044506	-0.482264	0.439071749534662	0.326706443070535	7.29575735911982	-6.64234
3432_21_EPHA3_EPHA3	ITIH4_Q14624_OID30762_v1_Inflammation_II	43	Inverse variance weighted	-0.161842	0.0737425	0.850576	0.736109	0.982842	0.0281859	43	Inverse variance weighted	0.0541274	0.0165137	1.05562	1.022	1.09035	0.00104644	3	Inverse variance weighted	-0.97558	0.412446625163828	0.376974	0.164605	0.863336	0.0210218	-0.161842	0.0541274	-0.97558	-0.0528056	-0.109036	-0.861201	0.755589766836971	0.326279132895052	5.32125036759796	-4.66869
7765_15_ITM2A_ITM2A	TSC1_Q92574_OID30478_v1_Inflammation_II	7	Inverse variance weighted	-0.535904	0.247104	0.58514	0.360513	0.949728	0.0301026	8	Inverse variance weighted	0.439603	0.106505	1.55209	1.25967	1.91239	3.67e-05	19	Inverse variance weighted	-0.396445	0.0801213214520001	0.672707	0.487781	0.927742	0.0156352	-0.535904	0.439603	-0.396445	-0.174279	-0.361625	-0.331317	-0.0172409	0.325205075315597	0.618238451986323	0.0321716986448705
9060_27_IGSF9B_TUTLB	TSC1_Q92574_OID30478_v1_Inflammation_II	7	Inverse variance weighted	-0.535904	0.247104	0.58514	0.360513	0.949728	0.0301026	8	Inverse variance weighted	0.312614	0.0661271	1.36699	1.20082	1.55616	2.27e-06	6	Inverse variance weighted	-0.556939	0.144506424574094	0.57296	0.346365	0.947795	0.0300986	-0.535904	0.312614	-0.556939	-0.174107	-0.361797	-0.457339	0.109125892164387	0.324884056170961	0.853397625045744	-0.20363
8815_1_OLFML1_OLFL1	TSC1_Q92574_OID30478_v1_Inflammation_II	7	Inverse variance weighted	-0.535904	0.247104	0.58514	0.360513	0.949728	0.0301026	8	Inverse variance weighted	0.34836	0.088442	1.41674	1.19126	1.6849	8.19e-05	9	Inverse variance weighted	-0.49815	0.113893987662099	0.607654	0.394725	0.935444	0.0236242	-0.535904	0.34836	-0.49815	-0.173535	-0.362369	-0.396767	0.0496969885222617	0.323817684971489	0.740370222826391	-0.0927349
14135_3_RXFP1_RXFP1	TSC1_Q92574_OID30478_v1_Inflammation_II	7	Inverse variance weighted	-0.535904	0.247104	0.58514	0.360513	0.949728	0.0301026	8	Inverse variance weighted	0.354045	0.0709866	1.42482	1.23975	1.63751	6.12e-07	9	Inverse variance weighted	-0.489462	0.103037565787004	0.612956	0.410819	0.914552	0.0165065	-0.535904	0.354045	-0.489462	-0.173292	-0.362613	-0.375245	0.0286620360894997	0.323363061766995	0.700209639922678	-0.0534835
13942_140_SPSB1_SPSB1	KDM3A_Q9Y4C1_OID30426_v1_Inflammation_II	15	Inverse variance weighted	-0.482031	0.205717	0.617528	0.412617	0.9242	0.0191202	18	Inverse variance weighted	0.23936	0.0443646	1.27044	1.16463	1.38585	6.84e-08	6	Inverse variance weighted	-0.646916	0.157614947972061	0.523658	0.325183	0.843272	0.00778504	-0.482031	0.23936	-0.646916	-0.154846	-0.327185	-0.463771	0.154079699804802	0.321235887407443	0.962118762957266	-0.319647
13430_50_SLC14A1_UT1	TSC1_Q92574_OID30478_v1_Inflammation_II	7	Inverse variance weighted	-0.535904	0.247104	0.58514	0.360513	0.949728	0.0301026	8	Inverse variance weighted	0.3965	0.085543	1.48661	1.25714	1.75798	3.57e-06	10	Inverse variance weighted	-0.434122	0.100029657499036	0.647833	0.423591	0.990786	0.045209	-0.535904	0.3965	-0.434122	-0.172129	-0.363775	-0.368188	0.0239286897200878	0.321194476268536	0.687040018665377	-0.0446511
12781_2_TARBP2_TRBP2	KDM3A_Q9Y4C1_OID30426_v1_Inflammation_II	15	Inverse variance weighted	-0.482031	0.205717	0.617528	0.412617	0.9242	0.0191202	18	Inverse variance weighted	0.146672	0.0379472	1.15797	1.07497	1.24738	0.000111016	3	Inverse variance weighted	-1.04794	0.551824933577654	0.35066	0.124932	0.984237	0.0465717	-0.482031	0.146672	-1.04794	-0.153703	-0.328328	-1.23528	0.927873680929875	0.318865895094272	2.56265783730287	-1.92493
2997_8_JAM2_JAM_B	TSC1_Q92574_OID30478_v1_Inflammation_II	7	Inverse variance weighted	-0.535904	0.247104	0.58514	0.360513	0.949728	0.0301026	8	Inverse variance weighted	0.396868	0.0797698	1.48716	1.27191	1.73884	6.52e-07	11	Inverse variance weighted	-0.428011	0.0920524330410107	0.651804	0.438746	0.968326	0.0340587	-0.535904	0.396868	-0.428011	-0.169864	-0.36604	-0.350287	0.0105588719881342	0.316966962099148	0.653636837182566	-0.0197029
17427_26_NLGN3_NLGN3	ITIH4_Q14624_OID30762_v1_Inflammation_II	43	Inverse variance weighted	-0.161842	0.0737425	0.850576	0.736109	0.982842	0.0281859	43	Inverse variance weighted	0.0491318	0.0192266	1.05036	1.01151	1.0907	0.0106063	3	Inverse variance weighted	-1.04357	0.509649564539922	0.352194	0.13523	0.917257	0.0326103	-0.161842	0.0491318	-1.04357	-0.0512726	-0.110569	-1.05019	0.947640577628618	0.316806616271552	6.48896262226287	-5.85535
7939_1_PQLC2L_CC055	ADAM23_O75077_OID20651_v1_Inflammation	108	Inverse variance weighted	-0.0661019	0.0288822	0.936035	0.884519	0.990552	0.0220985	104	Inverse variance weighted	0.0201632	0.0060733	1.02037	1.00829	1.03259	0.000900253	4	Inverse variance weighted	-1.03055	0.381047320189375	0.356811	0.172862	0.736506	0.00531749	-0.0661019	0.0201632	-1.03055	-0.0207792	-0.0453227	-0.767632	0.726073554745147	0.314350802043641	11.6128532113105	-10.9842
6604_59_NDNF_CD031	KDM3A_Q9Y4C1_OID30426_v1_Inflammation_II	15	Inverse variance weighted	-0.482031	0.205717	0.617528	0.412617	0.9242	0.0191202	18	Inverse variance weighted	0.299496	0.0575062	1.34918	1.20537	1.51015	1.91e-07	12	Inverse variance weighted	-0.505369	0.107853009859301	0.603283	0.3992	0.911699	0.0164488	-0.482031	0.299496	-0.505369	-0.151356	-0.330675	-0.362748	0.0600360080539693	0.313996294407608	0.752540658280917	-0.124548
12781_2_TARBP2_TRBP2	ADAM23_O75077_OID20651_v1_Inflammation	108	Inverse variance weighted	-0.0661019	0.0288822	0.936035	0.884519	0.990552	0.0220985	104	Inverse variance weighted	0.0193935	0.00623973	1.01958	1.00719	1.03213	0.00188313	3	Inverse variance weighted	-1.04794	0.551796877323152	0.35066	0.124932	0.984237	0.0465717	-0.0661019	0.0193935	-1.04794	-0.0203232	-0.0457787	-1.10185	1.06119869166895	0.307452289655383	16.6688804313442	-16.054
8932_1_ENTPD6_ENTP6	KDM3A_Q9Y4C1_OID30426_v1_Inflammation_II	15	Inverse variance weighted	-0.482031	0.205717	0.617528	0.412617	0.9242	0.0191202	18	Inverse variance weighted	0.24902	0.0655366	1.28277	1.12814	1.45859	0.000144861	18	Inverse variance weighted	-0.590265	0.130873056767367	0.554181	0.360075	0.852922	0.00729302	-0.482031	0.24902	-0.590265	-0.146988	-0.335043	-0.403499	0.109523257991669	0.304934720299358	0.837081588551558	-0.227212
7939_1_PQLC2L_CC055	LTB_Q06643_OID31383_v1_Oncology_II	65	Inverse variance weighted	0.203691	0.0727948	1.22592	1.06291	1.41392	0.00513951	77	Inverse variance weighted	-0.059819	0.0173437	0.941935	0.910453	0.974505	0.000562579	4	Inverse variance weighted	-1.03055	0.381048712888808	0.356811	0.172862	0.736506	0.00531749	0.203691	-0.059819	-1.03055	0.0616464977334766	0.142044919266523	-0.685209	0.808501974995541	0.302646516193054	-3.36396	3.96924910682683
7009_8_CD72_CD72	TSC1_Q92574_OID30478_v1_Inflammation_II	7	Inverse variance weighted	-0.535904	0.247104	0.58514	0.360513	0.949728	0.0301026	8	Inverse variance weighted	0.331373	0.0499409	1.39288	1.263	1.53612	3.24e-11	19	Inverse variance weighted	-0.487314	0.0795564393040703	0.614274	0.449197	0.840016	0.00227513	-0.535904	0.331373	-0.487314	-0.161483	-0.374421	-0.317414	-0.00555229	0.301327998989737	0.592295392221485	0.0103606057579894
8253_2_POMGNT1_PMGT1	ITIH4_Q14624_OID30762_v1_Inflammation_II	43	Inverse variance weighted	-0.161842	0.0737425	0.850576	0.736109	0.982842	0.0281859	43	Inverse variance weighted	0.0764568	0.0182278	1.07946	1.04157	1.11872	2.73e-05	4	Inverse variance weighted	-0.628674	0.195329468996469	0.533299	0.29007	0.980477	0.043026	-0.161842	0.0764568	-0.628674	-0.0480664	-0.113775	-0.430912	0.334779354400622	0.296996140568443	2.66255090426571	-2.06856
15666_21_BMP2_BMP_2	LTB_Q06643_OID31383_v1_Oncology_II	65	Inverse variance weighted	0.203691	0.0727948	1.22592	1.06291	1.41392	0.00513951	77	Inverse variance weighted	-0.0815865	0.0187104	0.921653	0.888466	0.95608	1.3e-05	4	Inverse variance weighted	-0.739879	0.272905036277772	0.477172	0.231583	0.9832	0.0448632	0.203691	-0.0815865	-0.739879	0.0603641367200924	0.143327280279908	-0.47453	0.595258007824526	0.29635090967084	-2.32965	2.92235194094862
6986_17_HS3ST3B1_HS3SB	TSC1_Q92574_OID30478_v1_Inflammation_II	7	Inverse variance weighted	-0.535904	0.247104	0.58514	0.360513	0.949728	0.0301026	8	Inverse variance weighted	0.47295	0.0985439	1.60472	1.32287	1.94662	1.59e-06	24	Inverse variance weighted	-0.332991	0.0675703905190798	0.716777	0.537427	0.95598	0.0234265	-0.535904	0.47295	-0.332991	-0.157488	-0.378416	-0.289926	-0.02505	0.293873364671769	0.54100333379775	0.0467433955457878
5315_22_TNNT2_Troponin_T	BTN2A1_Q7KYR7_OID20713_v1_Inflammation	133	Inverse variance weighted	-0.145131	0.0390027	0.864909	0.801255	0.93362	0.000198394	143	Inverse variance weighted	0.0902977	0.0118689	1.0945	1.06933	1.12026	2.79e-14	14	Inverse variance weighted	-0.472326	0.0849239178979251	0.62355	0.438364	0.886968	0.00860993	-0.145131	0.0902977	-0.472326	-0.0426499	-0.102481	-0.209101	0.123800976390469	0.293871512931542	1.44077147235605	-0.853028
8253_2_POMGNT1_PMGT1	KDM3A_Q9Y4C1_OID30426_v1_Inflammation_II	15	Inverse variance weighted	-0.482031	0.205717	0.617528	0.412617	0.9242	0.0191202	18	Inverse variance weighted	0.222114	0.0462352	1.24871	1.14053	1.36716	1.56e-06	4	Inverse variance weighted	-0.628674	0.195594277222838	0.533299	0.29007	0.980477	0.043026	-0.482031	0.222114	-0.628674	-0.139637	-0.342394	-0.523002	0.243727689546025	0.289684991118903	1.0849967584386	-0.505627
8932_1_ENTPD6_ENTP6	ITIH4_Q14624_OID30762_v1_Inflammation_II	43	Inverse variance weighted	-0.161842	0.0737425	0.850576	0.736109	0.982842	0.0281859	43	Inverse variance weighted	0.078438	0.020691	1.0816	1.03861	1.12636	0.000150094	18	Inverse variance weighted	-0.590265	0.129861659039442	0.554181	0.360075	0.852922	0.00729302	-0.161842	0.078438	-0.590265	-0.0462992	-0.115543	-0.300828	0.208229684427352	0.286076606822982	1.85877768332023	-1.28662
14135_3_RXFP1_RXFP1	ITIH4_Q14624_OID30762_v1_Inflammation_II	43	Inverse variance weighted	-0.161842	0.0737425	0.850576	0.736109	0.982842	0.0281859	43	Inverse variance weighted	0.0934663	0.0220926	1.09797	1.05144	1.14656	2.33e-05	9	Inverse variance weighted	-0.489462	0.0999468085974405	0.612956	0.410819	0.914552	0.0165065	-0.161842	0.0934663	-0.489462	-0.0457482	-0.116094	-0.241644	0.150147531939741	0.282672330495743	1.4930869720176	-0.927742
13565_2_RBL2_p130	MME_P08473_OID21307_v1_Oncology	89	Inverse variance weighted	-0.142375	0.0482966	0.867296	0.788962	0.953406	0.00319901	84	Inverse variance weighted	0.422883	0.0660824	1.52636	1.34093	1.73743	1.56e-10	151	Inverse variance weighted	-0.0945989	0.0282095390781931	0.909738	0.839928	0.985349	0.0202156	-0.142375	0.422883	-0.0945989	-0.0400042	-0.102371	-0.0952949	0.0152864740072544	0.280977021610163	0.669321407459076	-0.107367
9343_16_IL2RB_IL_2_sRb	IL15_P40933_OID20562_v1_Inflammation	87	Inverse variance weighted	-0.176418	0.067878	0.838268	0.733844	0.95755	0.00934837	87	Inverse variance weighted	-0.194022	0.0568867	0.823639	0.73674	0.920789	0.000648011	36	Inverse variance weighted	0.25498	0.0280062448398269	1.29044	1.05879	1.57277	0.0115414	-0.176418	-0.194022	0.25498	-0.0494718	-0.126946	-0.104364	0.00542041285086572	0.280423913169287	0.591572654462498	-0.0307248
8363_18_KIAA1324L_K132L	TSC1_Q92574_OID30478_v1_Inflammation_II	7	Inverse variance weighted	-0.535904	0.247104	0.58514	0.360513	0.949728	0.0301026	8	Inverse variance weighted	0.366197	0.0888462	1.44224	1.21174	1.71658	3.76e-05	14	Inverse variance weighted	-0.409961	0.0769769944555409	0.663676	0.475449	0.926422	0.0159914	-0.535904	0.366197	-0.409961	-0.150126	-0.385778	-0.301001	0.000748485829644652	0.280136728459921	0.56167013557908	-0.00139668
15585_304_FBLN5_fibulin_5	BTN2A1_Q7KYR7_OID20713_v1_Inflammation	133	Inverse variance weighted	-0.145131	0.0390027	0.864909	0.801255	0.93362	0.000198394	143	Inverse variance weighted	0.0898604	0.0106097	1.09402	1.07151	1.11701	2.46e-17	14	Inverse variance weighted	-0.452193	0.078869574494001	0.636231	0.452023	0.895509	0.00951967	-0.145131	0.0898604	-0.452193	-0.0406343	-0.104497	-0.195219	0.113950107663521	0.279983076715536	1.34511895393356	-0.785153
9783_75_DNAJC11_DJC11	LTB_Q06643_OID31383_v1_Oncology_II	65	Inverse variance weighted	0.203691	0.0727948	1.22592	1.06291	1.41392	0.00513951	77	Inverse variance weighted	-0.0908955	0.0193612	0.913113	0.879112	0.94843	2.67e-06	7	Inverse variance weighted	-0.624264	0.174763510069208	0.535655	0.309456	0.927198	0.0257463	0.203691	-0.0908955	-0.624264	0.0567427892248747	0.146948627775125	-0.285794	0.399279268960522	0.278572313259889	-1.40307	1.96021646292795
2833_20_KLK4_Kallikrein_4	KDM3A_Q9Y4C1_OID30426_v1_Inflammation_II	15	Inverse variance weighted	-0.482031	0.205717	0.617528	0.412617	0.9242	0.0191202	18	Inverse variance weighted	0.2277	0.0503614	1.25571	1.13768	1.38598	6.15e-06	5	Inverse variance weighted	-0.587481	0.15152618477826	0.555725	0.335691	0.919985	0.0223556	-0.482031	0.2277	-0.587481	-0.133769	-0.348261	-0.430761	0.163222001776915	0.277511965704753	0.893637138293072	-0.338613
9931_20_KRT1_Keratin_1	ADAM23_O75077_OID20651_v1_Inflammation	108	Inverse variance weighted	-0.0661019	0.0288822	0.936035	0.884519	0.990552	0.0220985	104	Inverse variance weighted	0.0268519	0.00707639	1.02722	1.01307	1.04156	0.000147898	14	Inverse variance weighted	-0.682915	0.14574675929355	0.505142	0.332467	0.767501	0.0013748	-0.0661019	0.0268519	-0.682915	-0.0183375	-0.0477644	-0.304001	0.267326105862991	0.277413140839404	4.59897643172575	-4.04415
16845_15_MPZL1_MPZL1	TSC1_Q92574_OID30478_v1_Inflammation_II	7	Inverse variance weighted	-0.535904	0.247104	0.58514	0.360513	0.949728	0.0301026	8	Inverse variance weighted	0.223834	0.0778636	1.25086	1.07382	1.4571	0.00404428	6	Inverse variance weighted	-0.661961	0.198300120399176	0.515839	0.287413	0.92581	0.0265324	-0.535904	0.223834	-0.661961	-0.148169	-0.387735	-0.536837	0.240499136769378	0.276484350982977	1.00174140892597	-0.448773
10024_44_HOGA1_HOGA1	TSC1_Q92574_OID30478_v1_Inflammation_II	7	Inverse variance weighted	-0.535904	0.247104	0.58514	0.360513	0.949728	0.0301026	8	Inverse variance weighted	0.370957	0.0912838	1.44912	1.21172	1.73303	4.83e-05	10	Inverse variance weighted	-0.397527	0.0832620769822086	0.67198	0.461827	0.977763	0.0377531	-0.535904	0.370957	-0.397527	-0.147465	-0.388439	-0.310659	0.0157285131706633	0.275170792289647	0.579691076335779	-0.0293495
8064_125_PVR_Poliovirus_receptor	KDM3A_Q9Y4C1_OID30426_v1_Inflammation_II	15	Inverse variance weighted	-0.482031	0.205717	0.617528	0.412617	0.9242	0.0191202	18	Inverse variance weighted	0.1873	0.0530953	1.20599	1.0868	1.33826	0.000419306	6	Inverse variance weighted	-0.706097	0.238973051514404	0.493567	0.254394	0.9576	0.0367865	-0.482031	0.1873	-0.706097	-0.132252	-0.349779	-0.600639	0.336134891188743	0.274364800531819	1.24606030533011	-0.697331
13942_140_SPSB1_SPSB1	ADAM23_O75077_OID20651_v1_Inflammation	108	Inverse variance weighted	-0.0661019	0.0288822	0.936035	0.884519	0.990552	0.0220985	104	Inverse variance weighted	0.0280035	0.00653264	1.0284	1.01532	1.04165	1.81e-05	6	Inverse variance weighted	-0.646916	0.157256923155379	0.523658	0.325183	0.843272	0.00778504	-0.0661019	0.0280035	-0.646916	-0.0181159	-0.047986	-0.326339	0.290107653901783	0.274060335713675	4.93691355893518	-4.38879
9931_20_KRT1_Keratin_1	ITIH4_Q14624_OID30762_v1_Inflammation_II	43	Inverse variance weighted	-0.161842	0.0737425	0.850576	0.736109	0.982842	0.0281859	43	Inverse variance weighted	0.0644781	0.0198898	1.0666	1.02582	1.109	0.0011879	14	Inverse variance weighted	-0.682915	0.145752277608367	0.505142	0.332467	0.767501	0.0013748	-0.161842	0.0644781	-0.682915	-0.0440331	-0.117809	-0.329708	0.241641409822958	0.272074585710938	2.03722040005006	-1.49307
17857_6_ACADL_ACADL	LTB_Q06643_OID31383_v1_Oncology_II	65	Inverse variance weighted	0.203691	0.0727948	1.22592	1.06291	1.41392	0.00513951	77	Inverse variance weighted	-0.0760345	0.0168299	0.926784	0.896711	0.957866	6.25e-06	8	Inverse variance weighted	-0.72782	0.179559275397558	0.482961	0.297793	0.783265	0.00317572	0.203691	-0.0760345	-0.72782	0.0553394072719488	0.148352009728051	-0.296597	0.407275587051162	0.271682568107172	-1.45611	1.99947348322076
13672_3_HSPA6_HSP76	TSC1_Q92574_OID30478_v1_Inflammation_II	7	Inverse variance weighted	-0.535904	0.247104	0.58514	0.360513	0.949728	0.0301026	8	Inverse variance weighted	0.536428	0.102332	1.70989	1.39914	2.08965	1.59e-07	27	Inverse variance weighted	-0.271159	0.0655316955036152	0.762495	0.588678	0.987634	0.0399497	-0.535904	0.536428	-0.271159	-0.145457	-0.390447	-0.2739	-0.0170153	0.271424318009428	0.511098023639539	0.0317506123793161
16845_15_MPZL1_MPZL1	KDM3A_Q9Y4C1_OID30426_v1_Inflammation_II	15	Inverse variance weighted	-0.482031	0.205717	0.617528	0.412617	0.9242	0.0191202	18	Inverse variance weighted	0.197278	0.0533667	1.21808	1.09711	1.3524	0.00021846	6	Inverse variance weighted	-0.661961	0.197813109816722	0.515839	0.287413	0.92581	0.0265324	-0.482031	0.197278	-0.661961	-0.130591	-0.35144	-0.518304	0.257123111154899	0.270917498772955	1.07525132796831	-0.533416
9783_75_DNAJC11_DJC11	ITIH4_Q14624_OID30762_v1_Inflammation_II	43	Inverse variance weighted	-0.161842	0.0737425	0.850576	0.736109	0.982842	0.0281859	43	Inverse variance weighted	0.0702017	0.0201294	1.07272	1.03123	1.11589	0.000487507	7	Inverse variance weighted	-0.624264	0.174760362500285	0.535655	0.309456	0.927198	0.0257463	-0.161842	0.0702017	-0.624264	-0.0438244	-0.118017	-0.386355	0.298705898497469	0.27078541182698	2.38723619696419	-1.84567
8815_1_OLFML1_OLFL1	KDM3A_Q9Y4C1_OID30426_v1_Inflammation_II	15	Inverse variance weighted	-0.482031	0.205717	0.617528	0.412617	0.9242	0.0191202	18	Inverse variance weighted	0.26076	0.0519984	1.29792	1.17215	1.43717	5.31e-07	9	Inverse variance weighted	-0.49815	0.11048283399753	0.607654	0.394725	0.935444	0.0236242	-0.482031	0.26076	-0.49815	-0.129897	-0.352133	-0.346444	0.0866488790460056	0.26947960628151	0.718717177097334	-0.179758
9060_27_IGSF9B_TUTLB	KDM3A_Q9Y4C1_OID30426_v1_Inflammation_II	15	Inverse variance weighted	-0.482031	0.205717	0.617528	0.412617	0.9242	0.0191202	18	Inverse variance weighted	0.225393	0.0412513	1.25281	1.15551	1.35832	4.66e-08	6	Inverse variance weighted	-0.556939	0.143322061784545	0.57296	0.346365	0.947795	0.0300986	-0.482031	0.225393	-0.556939	-0.12553	-0.356501	-0.406441	0.155381406131719	0.260418690584948	0.843184832172551	-0.322347
8815_1_OLFML1_OLFL1	ITIH4_Q14624_OID30762_v1_Inflammation_II	43	Inverse variance weighted	-0.161842	0.0737425	0.850576	0.736109	0.982842	0.0281859	43	Inverse variance weighted	0.0845037	0.0207002	1.08818	1.04491	1.13323	4.46e-05	9	Inverse variance weighted	-0.49815	0.109661603970786	0.607654	0.394725	0.935444	0.0236242	-0.161842	0.0845037	-0.49815	-0.0420955	-0.119746	-0.257032	0.172841241607382	0.260102700107284	1.58816922791045	-1.06796
12716_3_ZNF175_ZN175	TSC1_Q92574_OID30478_v1_Inflammation_II	7	Inverse variance weighted	-0.535904	0.247104	0.58514	0.360513	0.949728	0.0301026	8	Inverse variance weighted	0.434405	0.0966289	1.54404	1.27764	1.866	6.94e-06	20	Inverse variance weighted	-0.317788	0.0602765433763137	0.727757	0.557335	0.95029	0.0195657	-0.535904	0.434405	-0.317788	-0.138049	-0.397855	-0.256191	-0.0199069	0.257600020359458	0.47805368636873	0.037146354350187
17712_7_IDI1_IDI1	LTB_Q06643_OID31383_v1_Oncology_II	65	Inverse variance weighted	0.203691	0.0727948	1.22592	1.06291	1.41392	0.00513951	77	Inverse variance weighted	-0.0660969	0.0159463	0.93604	0.907237	0.965758	3.4e-05	5	Inverse variance weighted	-0.793232	0.235036814488673	0.45238	0.253098	0.808572	0.0074256	0.203691	-0.0660969	-0.793232	0.0524302385795439	0.151261178420456	-0.408242	0.513102394977342	0.257400333071196	-2.00422	2.51901824109428
7765_15_ITM2A_ITM2A	KDM3A_Q9Y4C1_OID30426_v1_Inflammation_II	15	Inverse variance weighted	-0.482031	0.205717	0.617528	0.412617	0.9242	0.0191202	18	Inverse variance weighted	0.312482	0.0626564	1.36681	1.20886	1.54541	6.13e-07	19	Inverse variance weighted	-0.396445	0.0679017504136696	0.672707	0.487781	0.927742	0.0156352	-0.482031	0.312482	-0.396445	-0.123882	-0.358149	-0.256969	0.00920545638727485	0.257000111369471	0.533097458860224	-0.0190972
10011_65_OCRL_OCRL	TSC1_Q92574_OID30478_v1_Inflammation_II	7	Inverse variance weighted	-0.535904	0.247104	0.58514	0.360513	0.949728	0.0301026	8	Inverse variance weighted	0.576609	0.113416	1.77999	1.4252	2.2231	3.69e-07	43	Inverse variance weighted	-0.236864	0.0688254420170605	0.789098	0.660745	0.942385	0.00891818	-0.535904	0.576609	-0.236864	-0.136578	-0.399326	-0.271476	-0.00168009	0.254855212523624	0.506575370274605	0.00313505477264326
13430_50_SLC14A1_UT1	KDM3A_Q9Y4C1_OID30426_v1_Inflammation_II	15	Inverse variance weighted	-0.482031	0.205717	0.617528	0.412617	0.9242	0.0191202	18	Inverse variance weighted	0.282686	0.0547465	1.32669	1.1917	1.47696	2.42e-07	10	Inverse variance weighted	-0.434122	0.0953678347687791	0.647833	0.423591	0.990786	0.045209	-0.482031	0.282686	-0.434122	-0.12272	-0.359311	-0.309641	0.0642007098359448	0.254590041173845	0.642368059489784	-0.133188
15666_21_BMP2_BMP_2	ITIH4_Q14624_OID30762_v1_Inflammation_II	43	Inverse variance weighted	-0.161842	0.0737425	0.850576	0.736109	0.982842	0.0281859	43	Inverse variance weighted	0.0556062	0.0212987	1.05718	1.01396	1.10225	0.00903345	4	Inverse variance weighted	-0.739879	0.272903336795993	0.477172	0.231583	0.9832	0.0448632	-0.161842	0.0556062	-0.739879	-0.0411419	-0.1207	-0.576032	0.493748659239442	0.254210396635377	3.55923032887259	-3.05081
8253_2_POMGNT1_PMGT1	LTB_Q06643_OID31383_v1_Oncology_II	65	Inverse variance weighted	0.203691	0.0727948	1.22592	1.06291	1.41392	0.00513951	77	Inverse variance weighted	-0.0820535	0.0161945	0.921223	0.892441	0.950932	4.05e-07	4	Inverse variance weighted	-0.628674	0.195329017245571	0.533299	0.29007	0.980477	0.043026	0.203691	-0.0820535	-0.628674	0.0515848678559894	0.152106549144011	-0.33126	0.434429741657308	0.253250081008516	-1.62628	2.13278373755585
13056_18_SLC6A16_S6A16	ITIH4_Q14624_OID30762_v1_Inflammation_II	43	Inverse variance weighted	-0.161842	0.0737425	0.850576	0.736109	0.982842	0.0281859	43	Inverse variance weighted	0.0538494	0.0162743	1.05533	1.02219	1.08953	0.000936778	9	Inverse variance weighted	-0.756233	0.244693571516977	0.469432	0.24897	0.885112	0.0194301	-0.161842	0.0538494	-0.756233	-0.0407227	-0.121119	-0.520322	0.438876694510495	0.251620366813534	3.21500344834205	-2.71176
13942_140_SPSB1_SPSB1	ITIH4_Q14624_OID30762_v1_Inflammation_II	43	Inverse variance weighted	-0.161842	0.0737425	0.850576	0.736109	0.982842	0.0281859	43	Inverse variance weighted	0.0629204	0.0229548	1.06494	1.01809	1.11395	0.00612428	6	Inverse variance weighted	-0.646916	0.157263449318687	0.523658	0.325183	0.843272	0.00778504	-0.161842	0.0629204	-0.646916	-0.0407042	-0.121138	-0.348941	0.26753217505246	0.251505933799978	2.1560588085022	-1.65305
14135_3_RXFP1_RXFP1	KDM3A_Q9Y4C1_OID30426_v1_Inflammation_II	15	Inverse variance weighted	-0.482031	0.205717	0.617528	0.412617	0.9242	0.0191202	18	Inverse variance weighted	0.246756	0.0501398	1.27987	1.16007	1.41203	8.59e-07	9	Inverse variance weighted	-0.489462	0.100688501484969	0.612956	0.410819	0.914552	0.0165065	-0.482031	0.246756	-0.489462	-0.120778	-0.361253	-0.318127	0.0765717504103333	0.250560145718912	0.659972686830993	-0.158852
6600_70_RELL2_RELL2	TSC1_Q92574_OID30478_v1_Inflammation_II	7	Inverse variance weighted	-0.535904	0.247104	0.58514	0.360513	0.949728	0.0301026	8	Inverse variance weighted	0.309275	0.0945695	1.36244	1.13192	1.63989	0.00107415	10	Inverse variance weighted	-0.431535	0.0898461191818763	0.649511	0.441586	0.955339	0.0283732	-0.535904	0.309275	-0.431535	-0.133463	-0.402441	-0.309562	0.0426351407733428	0.249043161042867	0.577643728376227	-0.0795574
7121_2_SYT7_SYT7	LTB_Q06643_OID31383_v1_Oncology_II	65	Inverse variance weighted	0.203691	0.0727948	1.22592	1.06291	1.41392	0.00513951	77	Inverse variance weighted	-0.0675133	0.0193839	0.934715	0.899869	0.970911	0.000495905	8	Inverse variance weighted	-0.749125	0.232884275012349	0.47278	0.257064	0.869515	0.0159625	0.203691	-0.0675133	-0.749125	0.0505759474190725	0.153115469580927	-0.405877	0.507029126443277	0.24829690010489	-1.99261	2.48920221534556
10024_44_HOGA1_HOGA1	KDM3A_Q9Y4C1_OID30426_v1_Inflammation_II	15	Inverse variance weighted	-0.482031	0.205717	0.617528	0.412617	0.9242	0.0191202	18	Inverse variance weighted	0.29958	0.0558533	1.34929	1.20938	1.50539	8.15e-08	10	Inverse variance weighted	-0.397527	0.0778838477102421	0.67198	0.461827	0.977763	0.0377531	-0.482031	0.29958	-0.397527	-0.119091	-0.36294	-0.271744	0.0335611685876347	0.247061324677206	0.563747177901434	-0.0696245
2997_8_JAM2_JAM_B	KDM3A_Q9Y4C1_OID30426_v1_Inflammation_II	15	Inverse variance weighted	-0.482031	0.205717	0.617528	0.412617	0.9242	0.0191202	18	Inverse variance weighted	0.277626	0.0523305	1.31999	1.19132	1.46257	1.13e-07	11	Inverse variance weighted	-0.428011	0.0876497957531444	0.651804	0.438746	0.968326	0.0340587	-0.482031	0.277626	-0.428011	-0.118827	-0.363204	-0.29062	0.0529667514562903	0.246512968236912	0.602908436219982	-0.109882
17427_26_NLGN3_NLGN3	AHNAK2_Q8IVF2_OID30244_v1_Cardiometabolic_II	21	Inverse variance weighted	0.207201	0.0987607	1.23023	1.01372	1.49298	0.0359041	21	Inverse variance weighted	-0.048274	0.0244343	0.952873	0.908314	0.999617	0.0481924	3	Inverse variance weighted	-1.04357	0.50965005406256	0.352194	0.13523	0.917257	0.0326103	0.207201	-0.048274	-1.04357	0.0503773522880085	0.156823672711992	-0.948537	1.04929145825063	0.243132736857882	-4.57786	5.06412291276371
10916_44_PLA2R1_PLA2R	LY75_O60449_OID20580_v1_Inflammation	173	Inverse variance weighted	0.115247	0.0206121	1.12215	1.07772	1.16841	2.25e-08	173	Inverse variance weighted	-0.498934	0.0534948	0.607178	0.546739	0.674297	1.09e-20	463	Inverse variance weighted	-0.0561399	0.0267146750408606	0.945407	0.908533	0.983778	0.00567913	0.115247	-0.498934	-0.0561399	0.0280101000496432	0.0872369129503568	-0.0243507	0.0803708631297299	0.243044043576584	-0.211291	0.697379142743855
11465_4_GPR135_GP135	TSC1_Q92574_OID30478_v1_Inflammation_II	7	Inverse variance weighted	-0.535904	0.247104	0.58514	0.360513	0.949728	0.0301026	8	Inverse variance weighted	0.345631	0.0834262	1.41288	1.19975	1.66387	3.43e-05	14	Inverse variance weighted	-0.374775	0.0730089237979282	0.687444	0.484055	0.976293	0.0362546	-0.535904	0.345631	-0.374775	-0.129534	-0.40637	-0.272631	0.0135635861069264	0.241710975611189	0.508731677215812	-0.0253097
5337_64_CD86_B7_2	CD27_P26842_OID21527_v1_Oncology	42	Inverse variance weighted	0.179611	0.0807451	1.19675	1.02158	1.40196	0.02612	44	Inverse variance weighted	0.0767348	0.0303465	1.07976	1.01741	1.14593	0.0114512	10	Inverse variance weighted	0.562248	0.127001508562415	1.75461	1.12704	2.73164	0.0127907	0.179611	0.0767348	0.562248	0.0431439552380173	0.136467301761983	-0.205779	0.292066912020351	0.240207412155783	-1.14569	1.62610582932645
9959_60_TMEM59L_TM59L	TSC1_Q92574_OID30478_v1_Inflammation_II	7	Inverse variance weighted	-0.535904	0.247104	0.58514	0.360513	0.949728	0.0301026	8	Inverse variance weighted	0.42484	0.0896074	1.52935	1.28301	1.82298	2.13e-06	17	Inverse variance weighted	-0.302982	0.0595076338305693	0.738612	0.549438	0.992921	0.0447429	-0.535904	0.42484	-0.302982	-0.128719	-0.407185	-0.245354	-0.012084	0.2401902339189	0.457831712654416	0.0225487551833852
5315_22_TNNT2_Troponin_T	PDIA5_Q14554_OID31209_v1_Oncology_II	81	Inverse variance weighted	-0.132765	0.0559546	0.875671	0.784714	0.977171	0.0176574	96	Inverse variance weighted	0.067445	0.0196382	1.06977	1.02938	1.11175	0.000593931	14	Inverse variance weighted	-0.472326	0.0849274838999768	0.62355	0.438364	0.886968	0.00860993	-0.132765	0.067445	-0.472326	-0.031856	-0.100909	-0.198314	0.134601881846851	0.239942801434642	1.49372180945674	-1.01384
9931_20_KRT1_Keratin_1	TSC1_Q92574_OID30478_v1_Inflammation_II	7	Inverse variance weighted	-0.535904	0.247104	0.58514	0.360513	0.949728	0.0301026	8	Inverse variance weighted	0.187422	0.0463253	1.20614	1.10145	1.32078	5.22e-05	14	Inverse variance weighted	-0.682915	0.146005018090032	0.505142	0.332467	0.767501	0.0013748	-0.535904	0.187422	-0.682915	-0.127993	-0.407911	-0.414163	0.158176708507295	0.238835876190006	0.772830357140052	-0.295159
10916_44_PLA2R1_PLA2R	CD302_Q8IX05_OID21328_v1_Oncology	84	Inverse variance weighted	-0.215996	0.071898	0.805739	0.699832	0.927673	0.00266285	95	Inverse variance weighted	0.917108	0.185851	2.50204	1.73818	3.60159	8.03e-07	463	Inverse variance weighted	-0.0561399	0.170449549660056	0.945407	0.908533	0.983778	0.00567913	-0.215996	0.917108	-0.0561399	-0.0514864	-0.164509	-0.385567	0.282594739405259	0.23836781905121	1.78507183143471	-1.30834
6604_59_NDNF_CD031	LTB_Q06643_OID31383_v1_Oncology_II	65	Inverse variance weighted	0.203691	0.0727948	1.22592	1.06291	1.41392	0.00513951	77	Inverse variance weighted	-0.0951474	0.0190386	0.909239	0.875935	0.943809	5.8e-07	12	Inverse variance weighted	-0.505369	0.10648439300372	0.603283	0.3992	0.911699	0.0164488	0.203691	-0.0951474	-0.505369	0.0480845767831333	0.155606840216867	-0.160625	0.256793987070425	0.236065797426964	-0.788569	1.26070106856994
7898_29_MDM1_MDM1	SLMAP_Q14BN4_OID31441_v1_Oncology_II	4	Inverse variance weighted	-1.26651	0.364859	0.281812	0.137843	0.576148	0.00051806	4	Inverse variance weighted	0.536512	0.27295	1.71003	1.00153	2.91974	0.0493442	9	Inverse variance weighted	-0.557099	0.196674490233368	0.572869	0.360959	0.909185	0.0180787	-1.26651	0.536512	-0.557099	-0.29889	-0.967625	-0.684372	0.0865917191818829	0.235994292349325	0.540358661427423	-0.0683701
11441_11_PYGL_PYGL	PDLIM7_Q9NR12_OID20729_v1_Inflammation	6	Inverse variance weighted	-0.666372	0.299942	0.513569	0.285287	0.924516	0.0263059	6	Inverse variance weighted	0.361451	0.107412	1.43541	1.16291	1.77177	0.000765161	26	Inverse variance weighted	-0.433585	0.0869141580588456	0.648181	0.456074	0.921207	0.0156227	-0.666372	0.361451	-0.433585	-0.15672	-0.509652	-0.327071	0.0136320032419106	0.235183747434317	0.490824557095801	-0.0204571
8363_18_KIAA1324L_K132L	KDM3A_Q9Y4C1_OID30426_v1_Inflammation_II	15	Inverse variance weighted	-0.482031	0.205717	0.617528	0.412617	0.9242	0.0191202	18	Inverse variance weighted	0.276503	0.054994	1.31851	1.18378	1.46857	4.96e-07	14	Inverse variance weighted	-0.409961	0.0714012508016586	0.663676	0.475449	0.926422	0.0159914	-0.482031	0.276503	-0.409961	-0.113355	-0.368675	-0.253302	0.026590963028363	0.235162325394231	0.525489096556396	-0.0551644
6986_17_HS3ST3B1_HS3SB	KDM3A_Q9Y4C1_OID30426_v1_Inflammation_II	15	Inverse variance weighted	-0.482031	0.205717	0.617528	0.412617	0.9242	0.0191202	18	Inverse variance weighted	0.340302	0.0717298	1.40537	1.22105	1.61752	2.09e-06	24	Inverse variance weighted	-0.332991	0.0546757770112459	0.716777	0.537427	0.95598	0.0234265	-0.482031	0.340302	-0.332991	-0.113317	-0.368714	-0.220482	-0.00615267	0.235082875033764	0.457401694693557	0.0127640553739715
2997_8_JAM2_JAM_B	ADAM23_O75077_OID20651_v1_Inflammation	108	Inverse variance weighted	-0.0661019	0.0288822	0.936035	0.884519	0.990552	0.0220985	104	Inverse variance weighted	0.0362154	0.00861385	1.03688	1.01952	1.05453	2.62e-05	11	Inverse variance weighted	-0.428011	0.0864379124391476	0.651804	0.438746	0.968326	0.0340587	-0.0661019	0.0362154	-0.428011	-0.0155006	-0.0506013	-0.184919	0.15391770503909	0.234495494286055	2.79748153355368	-2.32849
17427_26_NLGN3_NLGN3	MATN3_O15232_OID20979_v1_Neurology	89	Inverse variance weighted	-0.0841588	0.0386753	0.919285	0.852176	0.99168	0.0295529	82	Inverse variance weighted	0.0188895	0.00827472	1.01907	1.00267	1.03573	0.0224422	3	Inverse variance weighted	-1.04357	0.509648713062989	0.352194	0.13523	0.917257	0.0326103	-0.0841588	0.0188895	-1.04357	-0.0197126	-0.0644462	-1.01862	0.979198897993781	0.234230809206298	12.1035979015611	-11.6351
17712_7_IDI1_IDI1	TSC1_Q92574_OID30478_v1_Inflammation_II	7	Inverse variance weighted	-0.535904	0.247104	0.58514	0.360513	0.949728	0.0301026	8	Inverse variance weighted	0.157012	0.0489275	1.17001	1.06302	1.28777	0.00133165	5	Inverse variance weighted	-0.793232	0.235159965427963	0.45238	0.253098	0.808572	0.0074256	-0.535904	0.157012	-0.793232	-0.124547	-0.411357	-0.58546	0.336366697955512	0.232405075192483	1.09247225179803	-0.627662
17712_7_IDI1_IDI1	ITIH4_Q14624_OID30762_v1_Inflammation_II	43	Inverse variance weighted	-0.161842	0.0737425	0.850576	0.736109	0.982842	0.0281859	43	Inverse variance weighted	0.0473586	0.0183375	1.0485	1.01148	1.08687	0.00980577	5	Inverse variance weighted	-0.793232	0.235036055587722	0.45238	0.253098	0.808572	0.0074256	-0.161842	0.0473586	-0.793232	-0.0375663	-0.124276	-0.498237	0.423104331242388	0.232117574715972	3.07854245772327	-2.61431
7003_4_GALNT10_GLT10	CASP4_P49662_OID31276_v1_Oncology_II	7	Inverse variance weighted	-0.496491	0.205301	0.608663	0.407025	0.91019	0.0155906	7	Inverse variance weighted	0.0990494	0.041074	1.10412	1.01872	1.19668	0.0158876	3	Inverse variance weighted	-1.14747	0.591482879049395	0.317438	0.115584	0.87181	0.0260046	-0.496491	0.0990494	-1.14747	-0.113657	-0.382834	-1.27296	1.04564987872132	0.228919834337054	2.56392125457885	-2.10608
16845_15_MPZL1_MPZL1	ITIH4_Q14624_OID30762_v1_Inflammation_II	43	Inverse variance weighted	-0.161842	0.0737425	0.850576	0.736109	0.982842	0.0281859	43	Inverse variance weighted	0.0559072	0.020057	1.0575	1.01673	1.0999	0.00531304	6	Inverse variance weighted	-0.661961	0.197535928167489	0.515839	0.287413	0.92581	0.0265324	-0.161842	0.0559072	-0.661961	-0.0370084	-0.124833	-0.424179	0.350162055682618	0.22866992391436	2.62094620602728	-2.16361
9060_27_IGSF9B_TUTLB	ITIH4_Q14624_OID30762_v1_Inflammation_II	43	Inverse variance weighted	-0.161842	0.0737425	0.850576	0.736109	0.982842	0.0281859	43	Inverse variance weighted	0.0659001	0.0201248	1.06812	1.02681	1.11109	0.0010582	6	Inverse variance weighted	-0.556939	0.143026306446522	0.57296	0.346365	0.947795	0.0300986	-0.161842	0.0659001	-0.556939	-0.0367023	-0.12514	-0.317034	0.243629263570544	0.226778778570806	1.95891147870482	-1.50535
4931_59_F3_TF	TSC1_Q92574_OID30478_v1_Inflammation_II	7	Inverse variance weighted	-0.535904	0.247104	0.58514	0.360513	0.949728	0.0301026	8	Inverse variance weighted	0.345581	0.101291	1.41281	1.15841	1.72308	0.000645473	13	Inverse variance weighted	-0.347664	0.0688897476069206	0.706336	0.505521	0.986923	0.0416369	-0.535904	0.345581	-0.347664	-0.120146	-0.415758	-0.25517	0.0148776840340755	0.224193507207977	0.476148854341684	-0.0277618
6604_59_NDNF_CD031	ITIH4_Q14624_OID30762_v1_Inflammation_II	43	Inverse variance weighted	-0.161842	0.0737425	0.850576	0.736109	0.982842	0.0281859	43	Inverse variance weighted	0.071581	0.0214075	1.07421	1.03007	1.12024	0.000826612	12	Inverse variance weighted	-0.505369	0.106480010811908	0.603283	0.3992	0.911699	0.0164488	-0.161842	0.071581	-0.505369	-0.0361748	-0.125667	-0.244876	0.172525989173391	0.223519639808544	1.5130552030225	-1.06602
13430_50_SLC14A1_UT1	ITIH4_Q14624_OID30762_v1_Inflammation_II	43	Inverse variance weighted	-0.161842	0.0737425	0.850576	0.736109	0.982842	0.0281859	43	Inverse variance weighted	0.0832192	0.0246491	1.08678	1.03552	1.14057	0.000735074	10	Inverse variance weighted	-0.434122	0.0941261017544164	0.647833	0.423591	0.990786	0.045209	-0.161842	0.0832192	-0.434122	-0.0361273	-0.125715	-0.220614	0.148359888427483	0.223225766457645	1.36314822433029	-0.916697
5337_64_CD86_B7_2	ICAM3_P32942_OID20277_v1_Cardiometabolic	168	Inverse variance weighted	0.171889	0.0444226	1.18755	1.08852	1.29558	0.000109099	181	Inverse variance weighted	0.0681617	0.0136549	1.07054	1.04227	1.09958	5.98e-07	10	Inverse variance weighted	0.562248	0.126983569545929	1.75461	1.12704	2.73164	0.0127907	0.171889	0.0681617	0.562248	0.0383237788359036	0.133565448164096	-0.210564	0.287211575145924	0.222956257962016	-1.225	1.6709108543837
9783_75_DNAJC11_DJC11	ADAM23_O75077_OID20651_v1_Inflammation	108	Inverse variance weighted	-0.0661019	0.0288822	0.936035	0.884519	0.990552	0.0220985	104	Inverse variance weighted	0.0235355	0.0065918	1.02381	1.01067	1.03713	0.000356404	7	Inverse variance weighted	-0.624264	0.174754718039614	0.535655	0.309456	0.927198	0.0257463	-0.0661019	0.0235355	-0.624264	-0.0146924	-0.0514095	-0.357212	0.327826853900633	0.222268771738195	5.40395224826823	-4.95941
13378_80_C5orf63_YD286	TSC1_Q92574_OID30478_v1_Inflammation_II	7	Inverse variance weighted	-0.535904	0.247104	0.58514	0.360513	0.949728	0.0301026	8	Inverse variance weighted	0.413759	0.100871	1.51249	1.24117	1.84313	4.1e-05	22	Inverse variance weighted	-0.286723	0.0584426205726122	0.75072	0.567578	0.992956	0.0444794	-0.535904	0.413759	-0.286723	-0.118634	-0.41727	-0.233182	-0.00408673	0.221372197232278	0.435118527641199	0.00762586682335654
15666_21_BMP2_BMP_2	ADAM23_O75077_OID20651_v1_Inflammation	108	Inverse variance weighted	-0.0661019	0.0288822	0.936035	0.884519	0.990552	0.0220985	104	Inverse variance weighted	0.0196865	0.00582312	1.01988	1.00831	1.03159	0.000722913	4	Inverse variance weighted	-0.739879	0.272900790985458	0.477172	0.231583	0.9832	0.0448632	-0.0661019	0.0196865	-0.739879	-0.0145656	-0.0515363	-0.549451	0.520319950933364	0.220350611854128	8.31218089400293	-7.87148
17712_7_IDI1_IDI1	PI16_Q6UXB8_OID30676_v1_Inflammation_II	76	Inverse variance weighted	-0.111142	0.055674	0.894812	0.802308	0.997981	0.0459018	76	Inverse variance weighted	0.0308087	0.0123066	1.03129	1.00671	1.05647	0.0123	5	Inverse variance weighted	-0.793232	0.235034756996399	0.45238	0.253098	0.808572	0.0074256	-0.111142	0.0308087	-0.793232	-0.0244384	-0.0867034	-0.485107	0.436229701775926	0.219885120573897	4.36475446558436	-3.92498
5070_76_TNFRSF6B_DcR3	MILR1_Q7Z6M3_OID20482_v1_Inflammation	114	Inverse variance weighted	0.0790417	0.0362447	1.08225	1.00803	1.16193	0.0291998	111	Inverse variance weighted	-0.0182901	0.00929531	0.981876	0.96415	0.999929	0.0491064	5	Inverse variance weighted	-0.942219	0.304128047303053	0.389762	0.207036	0.73376	0.00351053	0.0790417	-0.0182901	-0.942219	0.0172332671238766	0.0618084368761234	-0.578858	0.613324239837861	0.218027525366566	-7.32345	7.75950174148397
7121_2_SYT7_SYT7	ADAM23_O75077_OID20651_v1_Inflammation	108	Inverse variance weighted	-0.0661019	0.0288822	0.936035	0.884519	0.990552	0.0220985	104	Inverse variance weighted	0.019089	0.0067433	1.01927	1.00589	1.03283	0.00464294	8	Inverse variance weighted	-0.749125	0.232880633578742	0.47278	0.257064	0.869515	0.0159625	-0.0661019	0.019089	-0.749125	-0.0143001	-0.0518018	-0.470746	0.442145952035731	0.216333941786677	7.12151936141733	-6.68885
9060_27_IGSF9B_TUTLB	ADAM23_O75077_OID20651_v1_Inflammation	108	Inverse variance weighted	-0.0661019	0.0288822	0.936035	0.884519	0.990552	0.0220985	104	Inverse variance weighted	0.0256264	0.00610581	1.02596	1.01375	1.03831	2.7e-05	6	Inverse variance weighted	-0.556939	0.143020243154972	0.57296	0.346365	0.947795	0.0300986	-0.0661019	0.0256264	-0.556939	-0.0142723	-0.0518296	-0.294592	0.266047343712222	0.215914031057913	4.45663290307964	-4.0248
8064_125_PVR_Poliovirus_receptor	LTB_Q06643_OID31383_v1_Oncology_II	65	Inverse variance weighted	0.203691	0.0727948	1.22592	1.06291	1.41392	0.00513951	77	Inverse variance weighted	-0.0620175	0.0156459	0.939866	0.911482	0.969135	7.38e-05	6	Inverse variance weighted	-0.706097	0.23876800957757	0.493567	0.254394	0.9576	0.0367865	0.203691	-0.0620175	-0.706097	0.0437904179755817	0.159900999024418	-0.424195	0.511775716747619	0.214984109888055	-2.08254	2.51250506420513
5491_12_SPOCK2_Testican_2	PDIA5_Q14554_OID31209_v1_Oncology_II	81	Inverse variance weighted	-0.132765	0.0559546	0.875671	0.784714	0.977171	0.0176574	96	Inverse variance weighted	-0.138187	0.0219922	0.870936	0.834192	0.909298	3.31e-10	47	Inverse variance weighted	0.205713	0.0195678519785682	1.2284	1.02177	1.47682	0.0285836	-0.132765	-0.138187	0.205713	-0.0284269	-0.104338	-0.0667798	0.00992613832871474	0.214114178379296	0.502993124465902	-0.0747648
9092_33_ANGPTL1_ANGL1	TSC1_Q92574_OID30478_v1_Inflammation_II	7	Inverse variance weighted	-0.535904	0.247104	0.58514	0.360513	0.949728	0.0301026	8	Inverse variance weighted	0.389719	0.0884434	1.47657	1.24156	1.75605	1.05e-05	27	Inverse variance weighted	-0.294243	0.0503738543354287	0.745095	0.583365	0.951663	0.0184313	-0.535904	0.389719	-0.294243	-0.114672	-0.421232	-0.213405	-0.0159393	0.213978737942767	0.39821459881375	0.029742877071784
12781_2_TARBP2_TRBP2	LTB_Q06643_OID31383_v1_Oncology_II	65	Inverse variance weighted	0.203691	0.0727948	1.22592	1.06291	1.41392	0.00513951	77	Inverse variance weighted	-0.0409584	0.0142631	0.959869	0.933407	0.987081	0.00408346	3	Inverse variance weighted	-1.04794	0.551797173298292	0.35066	0.124932	0.984237	0.0465717	0.203691	-0.0409584	-1.04794	0.0429218098968994	0.160769607103101	-1.0386	1.12444426956155	0.210719776655584	-5.09889	5.52033210884654
7765_15_ITM2A_ITM2A	ITIH4_Q14624_OID30762_v1_Inflammation_II	43	Inverse variance weighted	-0.161842	0.0737425	0.850576	0.736109	0.982842	0.0281859	43	Inverse variance weighted	0.0858847	0.0247131	1.08968	1.03816	1.14376	0.000510329	19	Inverse variance weighted	-0.396445	0.0650524083314117	0.672707	0.487781	0.927742	0.0156352	-0.161842	0.0858847	-0.396445	-0.0340486	-0.127793	-0.161551	0.0934541121288855	0.210381975988791	0.998204905160491	-0.577441
6600_70_RELL2_RELL2	KDM3A_Q9Y4C1_OID30426_v1_Inflammation_II	15	Inverse variance weighted	-0.482031	0.205717	0.617528	0.412617	0.9242	0.0191202	18	Inverse variance weighted	0.234896	0.0517486	1.26478	1.14279	1.39979	5.65e-06	10	Inverse variance weighted	-0.431535	0.0858174550003102	0.649511	0.441586	0.955339	0.0283732	-0.482031	0.234896	-0.431535	-0.101366	-0.380665	-0.269568	0.0668361077903135	0.210289674030168	0.559234606224769	-0.138655
9931_20_KRT1_Keratin_1	KDM3A_Q9Y4C1_OID30426_v1_Inflammation_II	15	Inverse variance weighted	-0.482031	0.205717	0.617528	0.412617	0.9242	0.0191202	18	Inverse variance weighted	0.148302	0.0421365	1.15986	1.06792	1.25972	0.000432274	14	Inverse variance weighted	-0.682915	0.145880535293107	0.505142	0.332467	0.767501	0.0013748	-0.482031	0.148302	-0.682915	-0.101277	-0.380753	-0.387203	0.18464843983476	0.210105671956265	0.803274899547333	-0.383064
6604_59_NDNF_CD031	ADAM23_O75077_OID20651_v1_Inflammation	108	Inverse variance weighted	-0.0661019	0.0288822	0.936035	0.884519	0.990552	0.0220985	104	Inverse variance weighted	0.0273949	0.00679553	1.02777	1.01418	1.04155	5.55e-05	12	Inverse variance weighted	-0.505369	0.106469146661147	0.603283	0.3992	0.911699	0.0164488	-0.0661019	0.0273949	-0.505369	-0.0138446	-0.0522574	-0.222524	0.194834971926602	0.209442550102577	3.36637830670549	-2.94749
7898_29_MDM1_MDM1	TSC1_Q92574_OID30478_v1_Inflammation_II	7	Inverse variance weighted	-0.535904	0.247104	0.58514	0.360513	0.949728	0.0301026	8	Inverse variance weighted	0.201196	0.0636259	1.22286	1.07949	1.38528	0.00156594	9	Inverse variance weighted	-0.557099	0.131908076036311	0.572869	0.360959	0.909185	0.0180787	-0.535904	0.201196	-0.557099	-0.112086	-0.423818	-0.370626	0.146453576903213	0.209153560616317	0.691590298185806	-0.273283
17712_7_IDI1_IDI1	STAB2_Q8WWQ8_OID30401_v1_Cardiometabolic_II	120	Inverse variance weighted	-0.0957426	0.0483882	0.908698	0.826477	0.999099	0.047857	125	Inverse variance weighted	0.025082	0.00946105	1.0254	1.00656	1.04459	0.00802347	5	Inverse variance weighted	-0.793232	0.235034570974821	0.45238	0.253098	0.808572	0.0074256	-0.0957426	0.025082	-0.793232	-0.0198959	-0.0758467	-0.480564	0.44077190852165	0.207805650676622	5.01932969180837	-4.60372
8363_18_KIAA1324L_K132L	LTB_Q06643_OID31383_v1_Oncology_II	65	Inverse variance weighted	0.203691	0.0727948	1.22592	1.06291	1.41392	0.00513951	77	Inverse variance weighted	-0.103078	0.0208341	0.902057	0.865963	0.939654	7.52e-07	14	Inverse variance weighted	-0.409961	0.0697963266675739	0.663676	0.475449	0.926422	0.0159914	0.203691	-0.103078	-0.409961	0.0422579290248064	0.161433487975194	-0.0945429	0.179058729293251	0.207460528515084	-0.464148	0.879068602548193
5337_64_CD86_B7_2	GLB1_P16278_OID20949_v1_Neurology	63	Inverse variance weighted	0.138124	0.0590407	1.14812	1.02266	1.28897	0.0193113	62	Inverse variance weighted	0.0507332	0.0185407	1.05204	1.0145	1.09098	0.00621322	10	Inverse variance weighted	0.562248	0.126983642415777	1.75461	1.12704	2.73164	0.0127907	0.138124	0.0507332	0.562248	0.0285246202416185	0.109599042758381	-0.220363	0.277412559376541	0.206515086713408	-1.59541	2.00843616040317
12781_2_TARBP2_TRBP2	CRELD2_Q6UXH1_OID20751_v1_Inflammation	73	Inverse variance weighted	-0.154382	0.0591511	0.856944	0.763136	0.962283	0.00905502	71	Inverse variance weighted	0.0302533	0.011474	1.03072	1.00779	1.05416	0.008372	3	Inverse variance weighted	-1.04794	0.551796973239285	0.35066	0.124932	0.984237	0.0465717	-0.154382	0.0302533	-1.04794	-0.0317035	-0.122679	-1.11323	1.04981853482272	0.205357060694711	7.21082849461685	-6.80011
16845_15_MPZL1_MPZL1	ADAM23_O75077_OID20651_v1_Inflammation	108	Inverse variance weighted	-0.0661019	0.0288822	0.936035	0.884519	0.990552	0.0220985	104	Inverse variance weighted	0.0203699	0.00561649	1.02058	1.00941	1.03188	0.000286943	6	Inverse variance weighted	-0.661961	0.197532778614498	0.515839	0.287413	0.92581	0.0265324	-0.0661019	0.0203699	-0.661961	-0.0134841	-0.0526178	-0.400648	0.373680139498511	0.20398962344735	6.06106945798313	-5.65309
6119_14_MAMDC2_MAMC2	PI16_Q6UXB8_OID30676_v1_Inflammation_II	76	Inverse variance weighted	-0.111142	0.055674	0.894812	0.802308	0.997981	0.0459018	76	Inverse variance weighted	0.0253067	0.0116031	1.02563	1.00257	1.04922	0.029182	6	Inverse variance weighted	-0.892482	0.372733684498267	0.409638	0.180676	0.928751	0.0325994	-0.111142	0.0253067	-0.892482	-0.0225858	-0.088556	-0.753144	0.70797224584855	0.203215904889954	6.77642423574689	-6.36999
7121_2_SYT7_SYT7	CSF2_P04141_OID30072_v1_Cardiometabolic_II	24	Inverse variance weighted	0.218389	0.103953	1.24407	1.01475	1.52522	0.0356554	23	Inverse variance weighted	-0.0588314	0.0281186	0.942866	0.892308	0.996288	0.0364157	8	Inverse variance weighted	-0.749125	0.232886473416225	0.47278	0.257064	0.869515	0.0159625	0.218389	-0.0588314	-0.749125	0.0440720939709952	0.174316715029005	-0.412385	0.500529581866796	0.201805642756151	-1.88831	2.29191955466361
10011_65_OCRL_OCRL	KDM3A_Q9Y4C1_OID30426_v1_Inflammation_II	15	Inverse variance weighted	-0.482031	0.205717	0.617528	0.412617	0.9242	0.0191202	18	Inverse variance weighted	0.40994	0.0786796	1.50673	1.2914	1.75796	1.89e-07	43	Inverse variance weighted	-0.236864	0.0387371200012217	0.789098	0.660745	0.942385	0.00891818	-0.482031	0.40994	-0.236864	-0.0971	-0.384931	-0.173025	-0.0211753	0.201439428455827	0.358949595964192	0.0439292609474619
3181_50_CTSS_Cathepsin_S	SV2A_Q7L0J3_OID30965_v1_Neurology_II	7	Inverse variance weighted	0.676437	0.201663	1.96686	1.32469	2.92033	0.0007957	7	Inverse variance weighted	1.11819	0.442403	3.0593	1.28541	7.28121	0.0114869	63	Inverse variance weighted	0.121759	0.494746753005473	1.12948	1.00034	1.2753	0.0493662	0.676437	1.11819	0.121759	0.13614881472776	0.54028804527224	-0.833555	1.10585245061849	0.201273500571451	-1.23227	1.63481991596154
12716_3_ZNF175_ZN175	KDM3A_Q9Y4C1_OID30426_v1_Inflammation_II	15	Inverse variance weighted	-0.482031	0.205717	0.617528	0.412617	0.9242	0.0191202	18	Inverse variance weighted	0.305235	0.0642911	1.35694	1.19629	1.53917	2.06e-06	20	Inverse variance weighted	-0.317788	0.0475011984961646	0.727757	0.557335	0.95029	0.0195657	-0.482031	0.305235	-0.317788	-0.0969999	-0.385031	-0.190102	-0.00389759	0.2012318230717	0.3943778734684	0.00808577267499947
17427_26_NLGN3_NLGN3	LY75_O60449_OID20580_v1_Inflammation	173	Inverse variance weighted	0.115247	0.0206121	1.12215	1.07772	1.16841	2.25e-08	173	Inverse variance weighted	-0.0222171	0.00549824	0.978028	0.967545	0.988625	5.33e-05	3	Inverse variance weighted	-1.04357	0.509648703733402	0.352194	0.13523	0.917257	0.0326103	0.115247	-0.0222171	-1.04357	0.0231851325763954	0.0920618804236046	-0.975726	1.02209659189386	0.201177730969872	-8.46639	8.8687469226978
13672_3_HSPA6_HSP76	KDM3A_Q9Y4C1_OID30426_v1_Inflammation_II	15	Inverse variance weighted	-0.482031	0.205717	0.617528	0.412617	0.9242	0.0191202	18	Inverse variance weighted	0.357174	0.0753283	1.42928	1.2331	1.65668	2.12e-06	27	Inverse variance weighted	-0.271159	0.0447771843024346	0.762495	0.588678	0.987634	0.0399497	-0.482031	0.357174	-0.271159	-0.0968511	-0.38518	-0.184614	-0.00908777	0.200922941759858	0.382992796199397	0.0188530873203187
11358_15_GRB10_GRB10	ADAM23_O75077_OID20651_v1_Inflammation	108	Inverse variance weighted	-0.0661019	0.0288822	0.936035	0.884519	0.990552	0.0220985	104	Inverse variance weighted	0.0269849	0.00688447	1.02735	1.01358	1.04131	8.87e-05	7	Inverse variance weighted	-0.48913	0.106846335282102	0.61316	0.399607	0.940837	0.0251441	-0.0661019	0.0269849	-0.48913	-0.0131991	-0.0529028	-0.222618	0.196219718811454	0.199677975204856	3.3677978192342	-2.96844
13056_18_SLC6A16_S6A16	ADAM23_O75077_OID20651_v1_Inflammation	108	Inverse variance weighted	-0.0661019	0.0288822	0.936035	0.884519	0.990552	0.0220985	104	Inverse variance weighted	0.0173608	0.00613513	1.01751	1.00535	1.02982	0.0046587	9	Inverse variance weighted	-0.756233	0.244692025356779	0.469432	0.24897	0.885112	0.0194301	-0.0661019	0.0173608	-0.756233	-0.0131288	-0.0529731	-0.492725	0.466467581045617	0.198614319511639	7.45402143442841	-7.05679
17427_26_NLGN3_NLGN3	OGN_P20774_OID21123_v1_Neurology	87	Inverse variance weighted	-0.147658	0.0452421	0.862726	0.789518	0.942722	0.00109951	82	Inverse variance weighted	0.0279598	0.00896118	1.02835	1.01045	1.04658	0.00180786	3	Inverse variance weighted	-1.04357	0.509648750682404	0.352194	0.13523	0.917257	0.0326103	-0.147658	0.0279598	-1.04357	-0.0291781	-0.11848	-1.02809	0.969733462511929	0.197605272388867	6.96261960812427	-6.56741
3432_21_EPHA3_EPHA3	PSG1_P11464_OID20916_v1_Neurology	155	Inverse variance weighted	0.0677669	0.0228798	1.07012	1.02319	1.1192	0.00305781	152	Inverse variance weighted	-0.0136918	0.00455202	0.986401	0.97764	0.995241	0.0026309	3	Inverse variance weighted	-0.97558	0.412445661318493	0.376974	0.164605	0.863336	0.0210218	0.0677669	-0.0136918	-0.97558	0.0133574932772177	0.0544094327227823	-0.795036	0.821750989461465	0.197109328483008	-11.7319	12.1261364203161
7009_8_CD72_CD72	RGMA_Q96B86_OID21065_v1_Neurology	100	Inverse variance weighted	-0.164841	0.0470679	0.848029	0.773296	0.929984	0.000461451	100	Inverse variance weighted	0.0662923	0.0192531	1.06854	1.02897	1.10963	0.000574854	19	Inverse variance weighted	-0.487314	0.0778266282631158	0.614274	0.449197	0.840016	0.00227513	-0.164841	0.0662923	-0.487314	-0.0323052	-0.132535	-0.184845	0.120234981247368	0.195978478313961	1.12135845430487	-0.729401
2833_20_KLK4_Kallikrein_4	ITIH4_Q14624_OID30762_v1_Inflammation_II	43	Inverse variance weighted	-0.161842	0.0737425	0.850576	0.736109	0.982842	0.0281859	43	Inverse variance weighted	0.0536961	0.0178567	1.05516	1.01887	1.09275	0.00263785	5	Inverse variance weighted	-0.587481	0.151094690370155	0.555725	0.335691	0.919985	0.0223556	-0.161842	0.0536961	-0.587481	-0.0315455	-0.130296	-0.327691	0.264600134614044	0.194915335628325	2.02476091095697	-1.63493
13111_79_BCL6_BCL6	TSC1_Q92574_OID30478_v1_Inflammation_II	7	Inverse variance weighted	-0.535904	0.247104	0.58514	0.360513	0.949728	0.0301026	8	Inverse variance weighted	0.341752	0.102484	1.40741	1.15129	1.72051	0.000853934	23	Inverse variance weighted	-0.303377	0.0548687129132314	0.73832	0.562003	0.969954	0.0293226	-0.535904	0.341752	-0.303377	-0.10368	-0.432224	-0.211222	0.00386291266985365	0.193467008902919	0.394142234013544	-0.00720822
2833_20_KLK4_Kallikrein_4	LTB_Q06643_OID31383_v1_Oncology_II	65	Inverse variance weighted	0.203691	0.0727948	1.22592	1.06291	1.41392	0.00513951	77	Inverse variance weighted	-0.0668509	0.0165396	0.935335	0.9055	0.966153	5.3e-05	5	Inverse variance weighted	-0.587481	0.151095693663407	0.555725	0.335691	0.919985	0.0223556	0.203691	-0.0668509	-0.587481	0.0392736266343203	0.16441779036568	-0.256874	0.335421186214597	0.192809433076506	-1.26109	1.6467124199671
15585_304_FBLN5_fibulin_5	TSC1_Q92574_OID30478_v1_Inflammation_II	7	Inverse variance weighted	-0.535904	0.247104	0.58514	0.360513	0.949728	0.0301026	8	Inverse variance weighted	0.228434	0.0881588	1.25663	1.05722	1.49365	0.00956513	14	Inverse variance weighted	-0.452193	0.0813944624437923	0.636231	0.452023	0.895509	0.00951967	-0.535904	0.228434	-0.452193	-0.103296	-0.432608	-0.262829	0.0562368884369935	0.19275138332321	0.490441108604291	-0.104938
11465_4_GPR135_GP135	KDM3A_Q9Y4C1_OID30426_v1_Inflammation_II	15	Inverse variance weighted	-0.482031	0.205717	0.617528	0.412617	0.9242	0.0191202	18	Inverse variance weighted	0.24546	0.0574569	1.27821	1.14207	1.43057	1.94e-05	14	Inverse variance weighted	-0.374775	0.06854026026124	0.687444	0.484055	0.976293	0.0362546	-0.482031	0.24546	-0.374775	-0.0919923	-0.390039	-0.226331	0.0423466468704115	0.190843115055628	0.469536726621856	-0.0878505
11441_11_PYGL_PYGL	LTB_Q06643_OID31383_v1_Oncology_II	65	Inverse variance weighted	0.203691	0.0727948	1.22592	1.06291	1.41392	0.00513951	77	Inverse variance weighted	-0.0894633	0.0141527	0.914422	0.889405	0.940142	2.59e-10	26	Inverse variance weighted	-0.433585	0.0777712236091939	0.648181	0.456074	0.921207	0.0156227	0.203691	-0.0894633	-0.433585	0.0387899366316328	0.164901480368367	-0.113642	0.191221534905653	0.190434811652534	-0.557911	0.938780522625815
16845_15_MPZL1_MPZL1	CSF2_P04141_OID30072_v1_Cardiometabolic_II	24	Inverse variance weighted	0.218389	0.103953	1.24407	1.01475	1.52522	0.0356554	23	Inverse variance weighted	-0.0625614	0.0262268	0.939355	0.892288	0.988905	0.0170604	6	Inverse variance weighted	-0.661961	0.197539559847732	0.515839	0.287413	0.92581	0.0265324	0.218389	-0.0625614	-0.661961	0.0414132086850972	0.176975600314903	-0.345764	0.428590745986653	0.189630635721344	-1.58325	1.96251240138707
5070_76_TNFRSF6B_DcR3	MME_P08473_OID21307_v1_Oncology	89	Inverse variance weighted	-0.142375	0.0482966	0.867296	0.788962	0.953406	0.00319901	84	Inverse variance weighted	0.0284785	0.0123713	1.02889	1.00424	1.05414	0.0213359	5	Inverse variance weighted	-0.942219	0.304128203853113	0.389762	0.207036	0.73376	0.00351053	-0.142375	0.0284785	-0.942219	-0.026833	-0.115542	-0.622924	0.569258248254028	0.188466734947693	4.37522356983587	-3.99829
7009_8_CD72_CD72	KDM3A_Q9Y4C1_OID30426_v1_Inflammation_II	15	Inverse variance weighted	-0.482031	0.205717	0.617528	0.412617	0.9242	0.0191202	18	Inverse variance weighted	0.185491	0.0526424	1.20381	1.08579	1.33465	0.000425723	19	Inverse variance weighted	-0.487314	0.078426425382445	0.614274	0.449197	0.840016	0.00227513	-0.482031	0.185491	-0.487314	-0.0903924	-0.391638	-0.244108	0.0633234103299299	0.187524074538766	0.506416119137889	-0.131368
7898_29_MDM1_MDM1	KDM3A_Q9Y4C1_OID30426_v1_Inflammation_II	15	Inverse variance weighted	-0.482031	0.205717	0.617528	0.412617	0.9242	0.0191202	18	Inverse variance weighted	0.162113	0.0329348	1.17599	1.10248	1.25441	8.56e-07	9	Inverse variance weighted	-0.557099	0.131393963959794	0.572869	0.360959	0.909185	0.0180787	-0.482031	0.162113	-0.557099	-0.0903128	-0.391718	-0.347845	0.16721935390147	0.187359006338488	0.721623950976668	-0.346906
17427_26_NLGN3_NLGN3	FST_P19883_OID20770_v1_Inflammation	20	Inverse variance weighted	-0.317046	0.135903	0.728297	0.557989	0.950586	0.019654	19	Inverse variance weighted	0.0566063	0.027588	1.05824	1.00254	1.11704	0.0401849	3	Inverse variance weighted	-1.04357	0.509651081679651	0.352194	0.13523	0.917257	0.0326103	-0.317046	0.0566063	-1.04357	-0.0590727	-0.257973	-1.05799	0.939843425005675	0.18632213565185	3.33701950201168	-2.96438
11308_8_CREB3L4_CR3L4	LTB_Q06643_OID31383_v1_Oncology_II	65	Inverse variance weighted	0.203691	0.0727948	1.22592	1.06291	1.41392	0.00513951	77	Inverse variance weighted	-0.455809	0.118076	0.633935	0.502963	0.799012	0.000113249	110	Inverse variance weighted	-0.0823278	0.05392653003256	0.92097	0.849666	0.998258	0.0452412	0.203691	-0.455809	-0.0823278	0.0375257658304821	0.166165651169518	-0.0681702	0.1432217646943	0.184228507922266	-0.334674	0.703131073482099
7898_29_MDM1_MDM1	ADAM23_O75077_OID20651_v1_Inflammation	108	Inverse variance weighted	-0.0661019	0.0288822	0.936035	0.884519	0.990552	0.0220985	104	Inverse variance weighted	0.0218347	0.00634613	1.02207	1.00944	1.03487	0.000580353	9	Inverse variance weighted	-0.557099	0.131285514906207	0.572869	0.360959	0.909185	0.0180787	-0.0661019	0.0218347	-0.557099	-0.0121641	-0.0539378	-0.269484	0.245155523009715	0.184020153580553	4.07679049436769	-3.70875
8064_125_PVR_Poliovirus_receptor	CASP4_P49662_OID31276_v1_Oncology_II	7	Inverse variance weighted	-0.496491	0.205301	0.608663	0.407025	0.91019	0.0155906	7	Inverse variance weighted	0.128661	0.0417317	1.1373	1.04798	1.23424	0.00204892	6	Inverse variance weighted	-0.706097	0.238826400724563	0.493567	0.254394	0.9576	0.0367865	-0.496491	0.128661	-0.706097	-0.0908472	-0.405644	-0.558947	0.377252579164351	0.18297859338627	1.12579537580834	-0.759838
13378_80_C5orf63_YD286	KDM3A_Q9Y4C1_OID30426_v1_Inflammation_II	15	Inverse variance weighted	-0.482031	0.205717	0.617528	0.412617	0.9242	0.0191202	18	Inverse variance weighted	0.307561	0.0632355	1.3601	1.20156	1.53957	1.15e-06	22	Inverse variance weighted	-0.286723	0.0452975272716933	0.75072	0.567578	0.992956	0.0444794	-0.482031	0.307561	-0.286723	-0.0881848	-0.393846	-0.176968	0.000598391067719514	0.182944240753733	0.367129877374476	-0.0012414
5708_1_LEAP2_LEAP2	FST_P19883_OID20770_v1_Inflammation	20	Inverse variance weighted	-0.317046	0.135903	0.728297	0.557989	0.950586	0.019654	19	Inverse variance weighted	0.239841	0.0998384	1.27105	1.04515	1.54577	0.0162928	50	Inverse variance weighted	-0.241684	0.0301987010167818	0.785305	0.676442	0.911687	0.0015015	-0.317046	0.239841	-0.241684	-0.0579655	-0.259081	-0.117155	0.00122391735687028	0.182830029414189	0.369520436206789	-0.00386038
15305_7_SCGN_Secretagogin	CEACAM6_P40199_OID30362_v1_Cardiometabolic_II	57	Inverse variance weighted	0.192627	0.0816074	1.21243	1.03322	1.42273	0.0182548	60	Inverse variance weighted	-0.093916	0.0392436	0.910359	0.842962	0.983145	0.0167041	12	Inverse variance weighted	-0.372615	0.0673529567349071	0.688931	0.483662	0.981316	0.0389704	0.192627	-0.093916	-0.372615	0.0349944859370862	0.157632524062914	-0.0970173	0.167006281137504	0.181669673100809	-0.503654	0.866993061551981
11441_11_PYGL_PYGL	PI16_Q6UXB8_OID30676_v1_Inflammation_II	76	Inverse variance weighted	-0.111142	0.055674	0.894812	0.802308	0.997981	0.0459018	76	Inverse variance weighted	0.0465093	0.0130037	1.04761	1.02124	1.07465	0.000348068	26	Inverse variance weighted	-0.433585	0.0777632680480967	0.648181	0.456074	0.921207	0.0156227	-0.111142	0.0465093	-0.433585	-0.0201657	-0.0909761	-0.172582	0.132250297116006	0.181441305958875	1.55280692872643	-1.18992
8064_125_PVR_Poliovirus_receptor	MILR1_Q7Z6M3_OID20482_v1_Inflammation	114	Inverse variance weighted	0.0790417	0.0362447	1.08225	1.00803	1.16193	0.0291998	111	Inverse variance weighted	-0.0202996	0.00932667	0.979905	0.962155	0.997983	0.0295168	6	Inverse variance weighted	-0.706097	0.238766113012921	0.493567	0.254394	0.9576	0.0367865	0.0790417	-0.0202996	-0.706097	0.0143335180416549	0.0647081859583451	-0.453648	0.48231509954698	0.181341207442275	-5.73935	6.10203316905946
13645_14_DHX38_PRP16	TSC1_Q92574_OID30478_v1_Inflammation_II	7	Inverse variance weighted	-0.535904	0.247104	0.58514	0.360513	0.949728	0.0301026	8	Inverse variance weighted	0.381766	0.107925	1.46487	1.18558	1.80995	0.000404199	26	Inverse variance weighted	-0.252427	0.0513957105994853	0.776913	0.612027	0.986222	0.0380804	-0.535904	0.381766	-0.252427	-0.0963679	-0.439536	-0.197104	0.00436767939283944	0.179823054392363	0.367796222463253	-0.00815011
7898_29_MDM1_MDM1	PI16_Q6UXB8_OID30676_v1_Inflammation_II	76	Inverse variance weighted	-0.111142	0.055674	0.894812	0.802308	0.997981	0.0459018	76	Inverse variance weighted	0.0357896	0.0129427	1.03644	1.01048	1.06307	0.00568807	9	Inverse variance weighted	-0.557099	0.131286258957662	0.572869	0.360959	0.909185	0.0180787	-0.111142	0.0357896	-0.557099	-0.0199384	-0.0912034	-0.277259	0.237382697527497	0.179395826346193	2.49464654555389	-2.13585
7009_8_CD72_CD72	ITIH4_Q14624_OID30762_v1_Inflammation_II	43	Inverse variance weighted	-0.161842	0.0737425	0.850576	0.736109	0.982842	0.0281859	43	Inverse variance weighted	0.0593818	0.0164837	1.06118	1.02744	1.09602	0.000315225	19	Inverse variance weighted	-0.487314	0.0778223178600604	0.614274	0.449197	0.840016	0.00227513	-0.161842	0.0593818	-0.487314	-0.0289376	-0.132904	-0.181469	0.123594145537539	0.178801697262973	1.12127574217607	-0.763672
17427_26_NLGN3_NLGN3	PSG1_P11464_OID20916_v1_Neurology	155	Inverse variance weighted	0.0677669	0.0228798	1.07012	1.02319	1.1192	0.00305781	152	Inverse variance weighted	-0.0115673	0.00470919	0.988499	0.979417	0.997665	0.0140363	3	Inverse variance weighted	-1.04357	0.509648692005175	0.352194	0.13523	0.917257	0.0326103	0.0677669	-0.0115673	-1.04357	0.0120713351109009	0.0556955908890991	-0.98684	1.01098277144104	0.178130185673478	-14.5623	14.918527829358
4931_59_F3_TF	KDM3A_Q9Y4C1_OID30426_v1_Inflammation_II	15	Inverse variance weighted	-0.482031	0.205717	0.617528	0.412617	0.9242	0.0191202	18	Inverse variance weighted	0.246081	0.056276	1.279	1.14543	1.42815	1.23e-05	13	Inverse variance weighted	-0.347664	0.0609284038881358	0.706336	0.505521	0.986923	0.0416369	-0.482031	0.246081	-0.347664	-0.0855536	-0.396477	-0.204973	0.0338660715192245	0.177485746868886	0.425228560535336	-0.0702571
9959_60_TMEM59L_TM59L	KDM3A_Q9Y4C1_OID30426_v1_Inflammation_II	15	Inverse variance weighted	-0.482031	0.205717	0.617528	0.412617	0.9242	0.0191202	18	Inverse variance weighted	0.28051	0.0606952	1.32381	1.17533	1.49104	3.81e-06	17	Inverse variance weighted	-0.302982	0.0488036437403214	0.738612	0.549438	0.992921	0.0447429	-0.482031	0.28051	-0.302982	-0.0849896	-0.397041	-0.180645	0.010665512363041	0.176315757917697	0.374757720054122	-0.0221262
11441_11_PYGL_PYGL	ITIH4_Q14624_OID30762_v1_Inflammation_II	43	Inverse variance weighted	-0.161842	0.0737425	0.850576	0.736109	0.982842	0.0281859	43	Inverse variance weighted	0.0649385	0.0195074	1.06709	1.02706	1.10868	0.000871846	26	Inverse variance weighted	-0.433585	0.0777712339053188	0.648181	0.456074	0.921207	0.0156227	-0.161842	0.0649385	-0.433585	-0.0281564	-0.133685	-0.180588	0.124275249808783	0.173974584729731	1.11582997290297	-0.767881
12716_3_ZNF175_ZN175	ITIH4_Q14624_OID30762_v1_Inflammation_II	43	Inverse variance weighted	-0.161842	0.0737425	0.850576	0.736109	0.982842	0.0281859	43	Inverse variance weighted	0.0876612	0.025128	1.09162	1.03916	1.14673	0.000485572	20	Inverse variance weighted	-0.317788	0.0433141998832976	0.727757	0.557335	0.95029	0.0195657	-0.161842	0.0876612	-0.317788	-0.0278577	-0.133984	-0.112754	0.0570381333943752	0.172129139508033	0.696689577807912	-0.352431
13430_50_SLC14A1_UT1	ADAM23_O75077_OID20651_v1_Inflammation	108	Inverse variance weighted	-0.0661019	0.0288822	0.936035	0.884519	0.990552	0.0220985	104	Inverse variance weighted	0.0260296	0.00678773	1.02637	1.01281	1.04012	0.000125662	10	Inverse variance weighted	-0.434122	0.094103913332671	0.647833	0.423591	0.990786	0.045209	-0.0661019	0.0260296	-0.434122	-0.0113	-0.0548019	-0.195744	0.173143632120531	0.170948700547721	2.9612407067537	-2.61934
8253_2_POMGNT1_PMGT1	ADAM23_O75077_OID20651_v1_Inflammation	108	Inverse variance weighted	-0.0661019	0.0288822	0.936035	0.884519	0.990552	0.0220985	104	Inverse variance weighted	0.0178335	0.00651662	1.01799	1.00507	1.03108	0.00620739	4	Inverse variance weighted	-0.628674	0.195324531833516	0.533299	0.29007	0.980477	0.043026	-0.0661019	0.0178335	-0.628674	-0.0112115	-0.0548905	-0.394048	0.371624621252648	0.169608696125764	5.96121140944001	-5.62199
14135_3_RXFP1_RXFP1	ADAM23_O75077_OID20651_v1_Inflammation	108	Inverse variance weighted	-0.0661019	0.0288822	0.936035	0.884519	0.990552	0.0220985	104	Inverse variance weighted	0.0227034	0.00662137	1.02296	1.00977	1.03633	0.000606252	9	Inverse variance weighted	-0.489462	0.0999255886438428	0.612956	0.410819	0.914552	0.0165065	-0.0661019	0.0227034	-0.489462	-0.0111124	-0.0549895	-0.206967	0.184741711446231	0.168110723913283	3.13102226854445	-2.7948
13056_18_SLC6A16_S6A16	SCGN_O76038_OID20457_v1_Inflammation	22	Inverse variance weighted	-0.259314	0.130132	0.771581	0.597875	0.995754	0.0462949	22	Inverse variance weighted	0.0575829	0.0286093	1.05927	1.00151	1.12037	0.0441426	9	Inverse variance weighted	-0.756233	0.244697547763484	0.469432	0.24897	0.885112	0.0194301	-0.259314	0.0575829	-0.756233	-0.0435461	-0.215768	-0.523153	0.436061094381983	0.167927969725761	2.0174498260065	-1.68159
7121_2_SYT7_SYT7	PI16_Q6UXB8_OID30676_v1_Inflammation_II	76	Inverse variance weighted	-0.111142	0.055674	0.894812	0.802308	0.997981	0.0459018	76	Inverse variance weighted	0.0248965	0.0124098	1.02521	1.00057	1.05045	0.0448365	8	Inverse variance weighted	-0.749125	0.232880802951624	0.47278	0.257064	0.869515	0.0159625	-0.111142	0.0248965	-0.749125	-0.0186506	-0.0924912	-0.475097	0.437795810220193	0.167808765591671	4.27469284321087	-3.93908
13942_140_SPSB1_SPSB1	LTB_Q06643_OID31383_v1_Oncology_II	65	Inverse variance weighted	0.203691	0.0727948	1.22592	1.06291	1.41392	0.00513951	77	Inverse variance weighted	-0.0526575	0.0174202	0.948705	0.916859	0.981656	0.0025046	6	Inverse variance weighted	-0.646916	0.157259492112733	0.523658	0.325183	0.843272	0.00778504	0.203691	-0.0526575	-0.646916	0.0340649629163908	0.169626454083609	-0.274164	0.342293567457347	0.167238086995049	-1.34598	1.68045159928043
5070_76_TNFRSF6B_DcR3	PSG1_P11464_OID20916_v1_Neurology	155	Inverse variance weighted	0.0677669	0.0228798	1.07012	1.02319	1.1192	0.00305781	152	Inverse variance weighted	-0.0119332	0.00499833	0.988138	0.978504	0.997866	0.016966	5	Inverse variance weighted	-0.942219	0.304128005632421	0.389762	0.207036	0.73376	0.00351053	0.0677669	-0.0119332	-0.942219	0.0112437185090658	0.0565232074909342	-0.584847	0.60733460954861	0.165917493572983	-8.63027	8.96210947429739
8932_1_ENTPD6_ENTP6	LTB_Q06643_OID31383_v1_Oncology_II	65	Inverse variance weighted	0.203691	0.0727948	1.22592	1.06291	1.41392	0.00513951	77	Inverse variance weighted	-0.0570703	0.0213119	0.944528	0.905886	0.984818	0.00740952	18	Inverse variance weighted	-0.590265	0.129857213155326	0.554181	0.360075	0.852922	0.00729302	0.203691	-0.0570703	-0.590265	0.0336865651188568	0.170004851881143	-0.220834	0.288206702903296	0.165380385757034	-1.08416	1.41491824814246
5070_76_TNFRSF6B_DcR3	RTN4R_Q9BZR6_OID21424_v1_Oncology	65	Inverse variance weighted	0.166198	0.0544379	1.18081	1.06131	1.31376	0.00226572	63	Inverse variance weighted	-0.0290618	0.0132228	0.971356	0.946506	0.99686	0.0279588	5	Inverse variance weighted	-0.942219	0.304128242558949	0.389762	0.207036	0.73376	0.00351053	0.166198	-0.0290618	-0.942219	0.0273826363797336	0.138815687620266	-0.568709	0.623473991795274	0.164758799732142	-3.42187	3.7513855542567
15585_304_FBLN5_fibulin_5	ADAM23_O75077_OID20651_v1_Inflammation	108	Inverse variance weighted	-0.0661019	0.0288822	0.936035	0.884519	0.990552	0.0220985	104	Inverse variance weighted	0.0236978	0.00686614	1.02398	1.01029	1.03785	0.00055767	14	Inverse variance weighted	-0.452193	0.078863979758364	0.636231	0.452023	0.895509	0.00951967	-0.0661019	0.0236978	-0.452193	-0.010716	-0.0553859	-0.165289	0.143857405482981	0.16211320631776	2.50052320972997	-2.1763
7765_15_ITM2A_ITM2A	PI16_Q6UXB8_OID30676_v1_Inflammation_II	76	Inverse variance weighted	-0.111142	0.055674	0.894812	0.802308	0.997981	0.0459018	76	Inverse variance weighted	0.0453581	0.0118399	1.0464	1.0224	1.07097	0.000127649	19	Inverse variance weighted	-0.396445	0.0650199917939922	0.672707	0.487781	0.927742	0.0156352	-0.111142	0.0453581	-0.396445	-0.017982	-0.0931597	-0.145421	0.109457158404226	0.161793582992352	1.30842982626032	-0.984843
8815_1_OLFML1_OLFL1	LTB_Q06643_OID31383_v1_Oncology_II	65	Inverse variance weighted	0.203691	0.0727948	1.22592	1.06291	1.41392	0.00513951	77	Inverse variance weighted	-0.0656672	0.0167712	0.936442	0.906161	0.967736	9.02e-05	9	Inverse variance weighted	-0.49815	0.109653182459572	0.607654	0.394725	0.935444	0.0236242	0.203691	-0.0656672	-0.49815	0.032712090040523	0.170979326959477	-0.182208	0.247632327661285	0.160596310449954	-0.89453	1.21572293672681
9931_20_KRT1_Keratin_1	DPP6_P42658_OID21354_v1_Oncology	45	Inverse variance weighted	-0.213294	0.0793609	0.807918	0.691535	0.943889	0.00719566	46	Inverse variance weighted	0.0500144	0.0183196	1.05129	1.01421	1.08972	0.00633143	14	Inverse variance weighted	-0.682915	0.145749515418231	0.505142	0.332467	0.767501	0.0013748	-0.213294	0.0500144	-0.682915	-0.0341556	-0.179139	-0.319825	0.251513422077805	0.160133756847225	1.49945206879801	-1.17918
6119_14_MAMDC2_MAMC2	MME_P08473_OID21307_v1_Oncology	89	Inverse variance weighted	-0.142375	0.0482966	0.867296	0.788962	0.953406	0.00319901	84	Inverse variance weighted	0.025505	0.0125001	1.02583	1.00101	1.05128	0.0413125	6	Inverse variance weighted	-0.892482	0.372733705185159	0.409638	0.180676	0.928751	0.0325994	-0.142375	0.025505	-0.892482	-0.0227628	-0.119613	-0.753321	0.70779525267685	0.159878782774067	5.29108781898323	-4.97133
7898_29_MDM1_MDM1	LTB_Q06643_OID31383_v1_Oncology_II	65	Inverse variance weighted	0.203691	0.0727948	1.22592	1.06291	1.41392	0.00513951	77	Inverse variance weighted	-0.0578894	0.0164189	0.943754	0.913867	0.974619	0.000422239	9	Inverse variance weighted	-0.557099	0.131288882380755	0.572869	0.360959	0.909185	0.0180787	0.203691	-0.0578894	-0.557099	0.0322501197220139	0.171441297277986	-0.225076	0.289576329188294	0.158328319361703	-1.10499	1.42164227365699
7009_8_CD72_CD72	ADAM23_O75077_OID20651_v1_Inflammation	108	Inverse variance weighted	-0.0661019	0.0288822	0.936035	0.884519	0.990552	0.0220985	104	Inverse variance weighted	0.0213502	0.00688321	1.02158	1.00789	1.03546	0.00192365	19	Inverse variance weighted	-0.487314	0.0778163006236158	0.614274	0.449197	0.840016	0.00227513	-0.0661019	0.0213502	-0.487314	-0.0104042	-0.0556977	-0.162924	0.142115713585854	0.1573968654291	2.46474194697751	-2.14995
13942_140_SPSB1_SPSB1	PI16_Q6UXB8_OID30676_v1_Inflammation_II	76	Inverse variance weighted	-0.111142	0.055674	0.894812	0.802308	0.997981	0.0459018	76	Inverse variance weighted	0.0270063	0.0130585	1.02737	1.00141	1.05401	0.0386304	6	Inverse variance weighted	-0.646916	0.157257212189135	0.523658	0.325183	0.843272	0.00778504	-0.111142	0.0270063	-0.646916	-0.0174708	-0.0936709	-0.325695	0.290753300993577	0.157194136666531	2.93044608635386	-2.61606
3432_21_EPHA3_EPHA3	LY75_O60449_OID20580_v1_Inflammation	173	Inverse variance weighted	0.115247	0.0206121	1.12215	1.07772	1.16841	2.25e-08	173	Inverse variance weighted	-0.0185662	0.00532294	0.981605	0.971417	0.9919	0.000486723	3	Inverse variance weighted	-0.97558	0.412445668449459	0.376974	0.164605	0.863336	0.0210218	0.115247	-0.0185662	-0.97558	0.018112816601233	0.0971341963987669	-0.790281	0.826506326762172	0.157165171831682	-6.85728	7.17160736098359
2833_20_KLK4_Kallikrein_4	PI16_Q6UXB8_OID30676_v1_Inflammation_II	76	Inverse variance weighted	-0.111142	0.055674	0.894812	0.802308	0.997981	0.0459018	76	Inverse variance weighted	0.029725	0.011399	1.03017	1.00741	1.05345	0.00911532	5	Inverse variance weighted	-0.587481	0.151092027933834	0.555725	0.335691	0.919985	0.0223556	-0.111142	0.029725	-0.587481	-0.0174629	-0.0936789	-0.313603	0.278677469926872	0.15712278569252	2.82165088724478	-2.50741
5708_1_LEAP2_LEAP2	CSF2_P04141_OID30072_v1_Cardiometabolic_II	24	Inverse variance weighted	0.218389	0.103953	1.24407	1.01475	1.52522	0.0356554	23	Inverse variance weighted	-0.141231	0.0453915	0.868289	0.794376	0.949079	0.00186206	50	Inverse variance weighted	-0.241684	0.0194854095963171	0.785305	0.676442	0.911687	0.0015015	0.218389	-0.141231	-0.241684	0.0341332042871644	0.184255604712836	-0.0040582	0.0723246070959459	0.156295574134316	-0.0185824	0.331173595511233
12781_2_TARBP2_TRBP2	OGN_P20774_OID21123_v1_Neurology	87	Inverse variance weighted	-0.147658	0.0452421	0.862726	0.789518	0.942722	0.00109951	82	Inverse variance weighted	0.0219646	0.00923379	1.02221	1.00387	1.04088	0.017373	3	Inverse variance weighted	-1.04794	0.551796901327515	0.35066	0.124932	0.984237	0.0465717	-0.147658	0.0219646	-1.04794	-0.0230175	-0.124641	-1.10454	1.05850441372242	0.155883475763538	7.48036713808343	-7.1686
8815_1_OLFML1_OLFL1	PI16_Q6UXB8_OID30676_v1_Inflammation_II	76	Inverse variance weighted	-0.111142	0.055674	0.894812	0.802308	0.997981	0.0459018	76	Inverse variance weighted	0.0344846	0.0131595	1.03509	1.00873	1.06213	0.00878	9	Inverse variance weighted	-0.49815	0.109648590790919	0.607654	0.394725	0.935444	0.0236242	-0.111142	0.0344846	-0.49815	-0.0171785	-0.0939633	-0.23209	0.197732729106184	0.154563927989361	2.08823147784813	-1.7791
17712_7_IDI1_IDI1	KDM3A_Q9Y4C1_OID30426_v1_Inflammation_II	15	Inverse variance weighted	-0.482031	0.205717	0.617528	0.412617	0.9242	0.0191202	18	Inverse variance weighted	0.093721	0.0382475	1.09825	1.01893	1.18375	0.0142704	5	Inverse variance weighted	-0.793232	0.235061784545432	0.45238	0.253098	0.808572	0.0074256	-0.482031	0.093721	-0.793232	-0.0743426	-0.407688	-0.535064	0.386378545992257	0.154227797543712	1.11001958220397	-0.801564
13111_79_BCL6_BCL6	ITIH4_Q14624_OID30762_v1_Inflammation_II	43	Inverse variance weighted	-0.161842	0.0737425	0.850576	0.736109	0.982842	0.0281859	43	Inverse variance weighted	0.0820458	0.0184101	1.08551	1.04703	1.12539	8.33e-06	23	Inverse variance weighted	-0.303377	0.0422631756450593	0.73832	0.562003	0.969954	0.0293226	-0.161842	0.0820458	-0.303377	-0.0248908	-0.136951	-0.107727	0.0579449932545313	0.153797247187825	0.665629163742883	-0.358035
2997_8_JAM2_JAM_B	PI16_Q6UXB8_OID30676_v1_Inflammation_II	76	Inverse variance weighted	-0.111142	0.055674	0.894812	0.802308	0.997981	0.0459018	76	Inverse variance weighted	0.0399345	0.011702	1.04074	1.01714	1.06489	0.000643387	11	Inverse variance weighted	-0.428011	0.0864386127373189	0.651804	0.438746	0.968326	0.0340587	-0.111142	0.0399345	-0.428011	-0.0170924	-0.0940494	-0.186512	0.152327281441353	0.153789157903581	1.67814564346641	-1.37057
11327_56_CLK2_CLK2	TSC1_Q92574_OID30478_v1_Inflammation_II	7	Inverse variance weighted	-0.535904	0.247104	0.58514	0.360513	0.949728	0.0301026	8	Inverse variance weighted	0.637246	0.141015	1.89126	1.43456	2.49337	6.21e-06	73	Inverse variance weighted	-0.129043	0.0902417844723634	0.878936	0.775055	0.996741	0.0443391	-0.535904	0.637246	-0.129043	-0.0822322	-0.453672	-0.259106	0.0946416592910161	0.153445807189561	0.483493469178896	-0.176602
13645_14_DHX38_PRP16	KDM3A_Q9Y4C1_OID30426_v1_Inflammation_II	15	Inverse variance weighted	-0.482031	0.205717	0.617528	0.412617	0.9242	0.0191202	18	Inverse variance weighted	0.292764	0.0642213	1.34013	1.18162	1.51989	5.15e-06	26	Inverse variance weighted	-0.252427	0.0360195111114135	0.776913	0.612027	0.986222	0.0380804	-0.482031	0.292764	-0.252427	-0.0739013	-0.40813	-0.1445	-0.00330305	0.153312374740251	0.299772391090181	0.00685235839032046
5315_22_TNNT2_Troponin_T	PI16_Q6UXB8_OID30676_v1_Inflammation_II	76	Inverse variance weighted	-0.111142	0.055674	0.894812	0.802308	0.997981	0.0459018	76	Inverse variance weighted	0.0358423	0.011419	1.03649	1.01355	1.05995	0.00169616	14	Inverse variance weighted	-0.472326	0.084918141369782	0.62355	0.438364	0.886968	0.00860993	-0.111142	0.0358423	-0.472326	-0.0169293	-0.0942125	-0.183369	0.149510298703633	0.152321292674184	1.64986406250489	-1.34522
17857_6_ACADL_ACADL	RTN4R_Q9BZR6_OID21424_v1_Oncology	65	Inverse variance weighted	0.166198	0.0544379	1.18081	1.06131	1.31376	0.00226572	63	Inverse variance weighted	-0.0347589	0.0118213	0.965838	0.943717	0.988478	0.00327837	8	Inverse variance weighted	-0.72782	0.179555185677712	0.482961	0.297793	0.783265	0.00317572	0.166198	-0.0347589	-0.72782	0.025298193609422	0.140900130390578	-0.32663	0.377226357537738	0.152216899668748	-1.9653	2.26973623114117
10024_44_HOGA1_HOGA1	ITIH4_Q14624_OID30762_v1_Inflammation_II	43	Inverse variance weighted	-0.161842	0.0737425	0.850576	0.736109	0.982842	0.0281859	43	Inverse variance weighted	0.0613652	0.0223759	1.06329	1.01766	1.11096	0.00609797	10	Inverse variance weighted	-0.397527	0.0760775971402572	0.67198	0.461827	0.977763	0.0377531	-0.161842	0.0613652	-0.397527	-0.0243943	-0.137448	-0.173506	0.124717779864529	0.150729310931478	1.07207376167091	-0.770615
9931_20_KRT1_Keratin_1	PI16_Q6UXB8_OID30676_v1_Inflammation_II	76	Inverse variance weighted	-0.111142	0.055674	0.894812	0.802308	0.997981	0.0459018	76	Inverse variance weighted	0.0245025	0.0114334	1.02481	1.0021	1.04803	0.0321071	14	Inverse variance weighted	-0.682915	0.145746904670606	0.505142	0.332467	0.767501	0.0013748	-0.111142	0.0245025	-0.682915	-0.0167332	-0.0944086	-0.302397	0.268930781270066	0.150556821105226	2.7208229596943	-2.41971
4931_59_F3_TF	LTB_Q06643_OID31383_v1_Oncology_II	65	Inverse variance weighted	0.203691	0.0727948	1.22592	1.06291	1.41392	0.00513951	77	Inverse variance weighted	-0.0881535	0.0211911	0.91562	0.878369	0.954451	3.18e-05	13	Inverse variance weighted	-0.347664	0.0593631223823068	0.706336	0.505521	0.986923	0.0416369	0.203691	-0.0881535	-0.347664	0.0306478457812897	0.17304357121871	-0.0857039	0.146999565650611	0.150462136464443	-0.420753	0.72167776048517
10024_44_HOGA1_HOGA1	LTB_Q06643_OID31383_v1_Oncology_II	65	Inverse variance weighted	0.203691	0.0727948	1.22592	1.06291	1.41392	0.00513951	77	Inverse variance weighted	-0.0769608	0.0212401	0.925926	0.888171	0.965287	0.000290792	10	Inverse variance weighted	-0.397527	0.0760827672641805	0.67198	0.461827	0.977763	0.0377531	0.203691	-0.0769608	-0.397527	0.030593955616017	0.173097461383983	-0.118528	0.179716179453811	0.150197568786204	-0.581901	0.88229627983692
8253_2_POMGNT1_PMGT1	AHNAK2_Q8IVF2_OID30244_v1_Cardiometabolic_II	21	Inverse variance weighted	0.207201	0.0987607	1.23023	1.01372	1.49298	0.0359041	21	Inverse variance weighted	-0.049338	0.024799	0.951859	0.9067	0.999268	0.0466445	4	Inverse variance weighted	-0.628674	0.195328329405228	0.533299	0.29007	0.980477	0.043026	0.207201	-0.049338	-0.628674	0.031017521036697	0.176183503963303	-0.351826	0.413861046670944	0.149697720060492	-1.69799	1.99738899298855
17231_1_LCP1_L_plastin	ITGB2_P05107_OID20315_v1_Cardiometabolic	53	Inverse variance weighted	0.214538	0.0900278	1.23929	1.03882	1.47845	0.0171713	52	Inverse variance weighted	0.116906	0.0264723	1.12401	1.06718	1.18387	1e-05	19	Inverse variance weighted	0.274412	0.0277561902373299	1.31576	1.08047	1.60228	0.00633356	0.214538	0.116906	0.274412	0.0320803599538034	0.182457650046197	-0.0223218	0.0864824928189701	0.149532290123337	-0.104046	0.403110352421793
13672_3_HSPA6_HSP76	ITIH4_Q14624_OID30762_v1_Inflammation_II	43	Inverse variance weighted	-0.161842	0.0737425	0.850576	0.736109	0.982842	0.0281859	43	Inverse variance weighted	0.0888724	0.0226457	1.09294	1.04549	1.14254	8.69e-05	27	Inverse variance weighted	-0.271159	0.035848999257981	0.762495	0.588678	0.987634	0.0399497	-0.161842	0.0888724	-0.271159	-0.0240986	-0.137743	-0.0943626	0.0461654795374191	0.14890190027007	0.583054367914519	-0.285251
2833_20_KLK4_Kallikrein_4	ADAM23_O75077_OID20651_v1_Inflammation	108	Inverse variance weighted	-0.0661019	0.0288822	0.936035	0.884519	0.990552	0.0220985	104	Inverse variance weighted	0.0166979	0.00639759	1.01684	1.00417	1.02967	0.00905356	5	Inverse variance weighted	-0.587481	0.151091685767965	0.555725	0.335691	0.919985	0.0223556	-0.0661019	0.0166979	-0.587481	-0.00980969	-0.0562922	-0.305949	0.286330015374345	0.14840246905472	4.62844913313082	-4.33164
15666_21_BMP2_BMP_2	DPP6_P42658_OID21354_v1_Oncology	45	Inverse variance weighted	-0.213294	0.0793609	0.807918	0.691535	0.943889	0.00719566	46	Inverse variance weighted	0.0427077	0.0187854	1.04363	1.00591	1.08277	0.0229987	4	Inverse variance weighted	-0.739879	0.272901946189978	0.477172	0.231583	0.9832	0.0448632	-0.213294	0.0427077	-0.739879	-0.0315986	-0.181696	-0.566486	0.503289250539357	0.148145328850365	2.6558900225492	-2.3596
2516_57_CCL21_6Ckine	PDIA5_Q14554_OID31209_v1_Oncology_II	81	Inverse variance weighted	-0.132765	0.0559546	0.875671	0.784714	0.977171	0.0176574	96	Inverse variance weighted	0.150611	0.0170453	1.16254	1.12435	1.20204	9.93e-19	107	Inverse variance weighted	-0.130167	0.00627641653937142	0.877948	0.805407	0.957024	0.00309297	-0.132765	0.150611	-0.130167	-0.0196046	-0.11316	-0.0319064	-0.00730283	0.147664063428747	0.240322399002831	0.0550057278546641
7738_299_STX2_STX2	TSC1_Q92574_OID30478_v1_Inflammation_II	7	Inverse variance weighted	-0.535904	0.247104	0.58514	0.360513	0.949728	0.0301026	8	Inverse variance weighted	0.399254	0.0772864	1.49071	1.28117	1.73453	2.39e-07	52	Inverse variance weighted	-0.198132	0.0341355606467944	0.820262	0.709968	0.94769	0.00716146	-0.535904	0.399254	-0.198132	-0.0791049	-0.456799	-0.146011	-0.0121992	0.147610096016722	0.272456496695113	0.0227636953383316
11441_11_PYGL_PYGL	MME_P08473_OID21307_v1_Oncology	89	Inverse variance weighted	-0.142375	0.0482966	0.867296	0.788962	0.953406	0.00319901	84	Inverse variance weighted	0.0483992	0.0136833	1.04959	1.02181	1.07812	0.00040453	26	Inverse variance weighted	-0.433585	0.0777637362273033	0.648181	0.456074	0.921207	0.0156227	-0.142375	0.0483992	-0.433585	-0.0209852	-0.12139	-0.173402	0.131431746374808	0.147393251174489	1.21792156795418	-0.923135
11465_4_GPR135_GP135	ITIH4_Q14624_OID30762_v1_Inflammation_II	43	Inverse variance weighted	-0.161842	0.0737425	0.850576	0.736109	0.982842	0.0281859	43	Inverse variance weighted	0.0636441	0.017486	1.06571	1.02981	1.10287	0.000272937	14	Inverse variance weighted	-0.374775	0.0670827888652231	0.687444	0.484055	0.976293	0.0362546	-0.161842	0.0636441	-0.374775	-0.0238522	-0.13799	-0.155334	0.107630063081163	0.147379698728572	0.959791730448657	-0.665032
10011_65_OCRL_OCRL	ITIH4_Q14624_OID30762_v1_Inflammation_II	43	Inverse variance weighted	-0.161842	0.0737425	0.850576	0.736109	0.982842	0.0281859	43	Inverse variance weighted	0.100497	0.0236385	1.10572	1.05566	1.15816	2.12e-05	43	Inverse variance weighted	-0.236864	0.0215846272776871	0.789098	0.660745	0.942385	0.00891818	-0.161842	0.100497	-0.236864	-0.0238042	-0.138038	-0.0661101	0.0185016815602411	0.147083019033863	0.408485551594302	-0.11432
9369_174_LRRC4C_NGL1	TSC1_Q92574_OID30478_v1_Inflammation_II	7	Inverse variance weighted	-0.535904	0.247104	0.58514	0.360513	0.949728	0.0301026	8	Inverse variance weighted	0.26199	0.0685535	1.29951	1.13613	1.4864	0.000132539	20	Inverse variance weighted	-0.300066	0.0420331097657784	0.740769	0.577934	0.949484	0.017822	-0.535904	0.26199	-0.300066	-0.0786144	-0.45729	-0.160999	0.00377044993514869	0.14669498550004	0.300425651238203	-0.00703568
13111_79_BCL6_BCL6	KDM3A_Q9Y4C1_OID30426_v1_Inflammation_II	15	Inverse variance weighted	-0.482031	0.205717	0.617528	0.412617	0.9242	0.0191202	18	Inverse variance weighted	0.232359	0.0603379	1.26157	1.12086	1.41995	0.000117653	23	Inverse variance weighted	-0.303377	0.0445023211312253	0.73832	0.562003	0.969954	0.0293226	-0.482031	0.232359	-0.303377	-0.0704925	-0.411538	-0.157717	0.0167320572662561	0.146240632810461	0.327192857851179	-0.0347116
8064_125_PVR_Poliovirus_receptor	PDLIM7_Q9NR12_OID20729_v1_Inflammation	6	Inverse variance weighted	-0.666372	0.299942	0.513569	0.285287	0.924516	0.0263059	6	Inverse variance weighted	0.137665	0.058067	1.14759	1.02414	1.28592	0.0177497	6	Inverse variance weighted	-0.706097	0.238899815297448	0.493567	0.254394	0.9576	0.0367865	-0.666372	0.137665	-0.706097	-0.097205	-0.569166	-0.565449	0.371038636597108	0.14587208694533	0.848548653969878	-0.556804
17712_7_IDI1_IDI1	FST_P19883_OID20770_v1_Inflammation	20	Inverse variance weighted	-0.317046	0.135903	0.728297	0.557989	0.950586	0.019654	19	Inverse variance weighted	0.0573679	0.0290357	1.05905	1.00046	1.12106	0.048181	5	Inverse variance weighted	-0.793232	0.235040353670158	0.45238	0.253098	0.808572	0.0074256	-0.317046	0.0573679	-0.793232	-0.045506	-0.27154	-0.506185	0.415173056209295	0.14353132159527	1.59656664304747	-1.3095
8064_125_PVR_Poliovirus_receptor	MATN3_O15232_OID20979_v1_Neurology	89	Inverse variance weighted	-0.0841588	0.0386753	0.919285	0.852176	0.99168	0.0295529	82	Inverse variance weighted	0.0170927	0.00763155	1.01724	1.00214	1.03257	0.0251081	6	Inverse variance weighted	-0.706097	0.238766073581826	0.493567	0.254394	0.9576	0.0367865	-0.0841588	0.0170927	-0.706097	-0.0120691	-0.0720897	-0.480051	0.455912428530453	0.143408393076847	5.70410560255379	-5.41729
8064_125_PVR_Poliovirus_receptor	RTN4R_Q9BZR6_OID21424_v1_Oncology	65	Inverse variance weighted	0.166198	0.0544379	1.18081	1.06131	1.31376	0.00226572	63	Inverse variance weighted	-0.0336777	0.0137482	0.966883	0.941177	0.993291	0.0143011	6	Inverse variance weighted	-0.706097	0.238766486873818	0.493567	0.254394	0.9576	0.0367865	0.166198	-0.0336777	-0.706097	0.023779733516235	0.142418590483765	-0.444203	0.491762047788919	0.143080465217176	-2.67273	2.95888692468956
9060_27_IGSF9B_TUTLB	PI16_Q6UXB8_OID30676_v1_Inflammation_II	76	Inverse variance weighted	-0.111142	0.055674	0.894812	0.802308	0.997981	0.0459018	76	Inverse variance weighted	0.028542	0.0114169	1.02895	1.00618	1.05224	0.0124201	6	Inverse variance weighted	-0.556939	0.143020528789566	0.57296	0.346365	0.947795	0.0300986	-0.111142	0.028542	-0.556939	-0.0158962	-0.0952456	-0.296216	0.264424070731867	0.143026023516008	2.6652121591442	-2.37916
13430_50_SLC14A1_UT1	LTB_Q06643_OID31383_v1_Oncology_II	65	Inverse variance weighted	0.203691	0.0727948	1.22592	1.06291	1.41392	0.00513951	77	Inverse variance weighted	-0.0670592	0.0182987	0.93514	0.902195	0.969288	0.000247642	10	Inverse variance weighted	-0.434122	0.0941117477156811	0.647833	0.423591	0.990786	0.045209	0.203691	-0.0670592	-0.434122	0.0291118586163353	0.174579558383665	-0.155347	0.21357088413907	0.142921381004165	-0.762659	1.04850212779987
7898_29_MDM1_MDM1	CRELD2_Q6UXH1_OID20751_v1_Inflammation	73	Inverse variance weighted	-0.154382	0.0591511	0.856944	0.763136	0.962283	0.00905502	71	Inverse variance weighted	0.0395007	0.0133308	1.04029	1.01346	1.06783	0.00304553	9	Inverse variance weighted	-0.557099	0.131286497809935	0.572869	0.360959	0.909185	0.0180787	-0.154382	0.0395007	-0.557099	-0.0220058	-0.132377	-0.279327	0.235315759325499	0.142540630885652	1.80931999842732	-1.52424
9060_27_IGSF9B_TUTLB	MILR1_Q7Z6M3_OID20482_v1_Inflammation	114	Inverse variance weighted	0.0790417	0.0362447	1.08225	1.00803	1.16193	0.0291998	111	Inverse variance weighted	-0.0202153	0.00887361	0.979988	0.963091	0.997181	0.0227182	6	Inverse variance weighted	-0.556939	0.143020270058359	0.57296	0.346365	0.947795	0.0300986	0.0790417	-0.0202153	-0.556939	0.0112587017864704	0.0677830022135296	-0.269061	0.291578431100855	0.142440018581462	-3.40404	3.68891884087993
7939_1_PQLC2L_CC055	BTN2A1_Q7KYR7_OID20713_v1_Inflammation	133	Inverse variance weighted	-0.145131	0.0390027	0.864909	0.801255	0.93362	0.000198394	143	Inverse variance weighted	0.0200281	0.0101436	1.02023	1.00015	1.04072	0.0483284	4	Inverse variance weighted	-1.03055	0.38104735466905	0.356811	0.172862	0.736506	0.00531749	-0.145131	0.0200281	-1.03055	-0.02064	-0.124491	-0.767493	0.72621281770298	0.142216204365467	5.28827171412224	-5.00384
9177_6_FAM3B_FAM3B	SCGN_O76038_OID20457_v1_Inflammation	22	Inverse variance weighted	-0.259314	0.130132	0.771581	0.597875	0.995754	0.0462949	22	Inverse variance weighted	0.324994	0.0669135	1.38402	1.21391	1.57798	1.19e-06	89	Inverse variance weighted	-0.113441	0.0225653033273007	0.892757	0.804515	0.990679	0.0326493	-0.259314	0.324994	-0.113441	-0.0368675	-0.222447	-0.0810955	0.00736048606389123	0.142173144161623	0.312730724647826	-0.0283844
9959_60_TMEM59L_TM59L	ITIH4_Q14624_OID30762_v1_Inflammation_II	43	Inverse variance weighted	-0.161842	0.0737425	0.850576	0.736109	0.982842	0.0281859	43	Inverse variance weighted	0.0756285	0.0190372	1.07856	1.03906	1.11957	7.11e-05	17	Inverse variance weighted	-0.302982	0.0457602031890046	0.738612	0.549438	0.992921	0.0447429	-0.161842	0.0756285	-0.302982	-0.0229141	-0.138928	-0.112604	0.066775904381783	0.141583242336059	0.695766219424179	-0.4126
8815_1_OLFML1_OLFL1	ADAM23_O75077_OID20651_v1_Inflammation	108	Inverse variance weighted	-0.0661019	0.0288822	0.936035	0.884519	0.990552	0.0220985	104	Inverse variance weighted	0.0187226	0.00652011	1.0189	1.00596	1.032	0.00408499	9	Inverse variance weighted	-0.49815	0.109647719666955	0.607654	0.394725	0.935444	0.0236242	-0.0661019	0.0187226	-0.49815	-0.00932668	-0.0567752	-0.224236	0.205582851684633	0.141095422012203	3.39227961669965	-3.11009
8932_1_ENTPD6_ENTP6	PI16_Q6UXB8_OID30676_v1_Inflammation_II	76	Inverse variance weighted	-0.111142	0.055674	0.894812	0.802308	0.997981	0.0459018	76	Inverse variance weighted	0.0264479	0.0119449	1.0268	1.00304	1.05112	0.026818	18	Inverse variance weighted	-0.590265	0.129851901337583	0.554181	0.360075	0.852922	0.00729302	-0.111142	0.0264479	-0.590265	-0.0156113	-0.0955305	-0.270121	0.238898451472797	0.140462715934254	2.43041834685278	-2.14949
11358_15_GRB10_GRB10	OGN_P20774_OID21123_v1_Neurology	87	Inverse variance weighted	-0.147658	0.0452421	0.862726	0.789518	0.942722	0.00109951	82	Inverse variance weighted	0.0423899	0.00940706	1.0433	1.02424	1.06272	6.6e-06	7	Inverse variance weighted	-0.48913	0.106846917893984	0.61316	0.399607	0.940837	0.0251441	-0.147658	0.0423899	-0.48913	-0.0207342	-0.126924	-0.230154	0.188685794628538	0.140419759400236	1.55869250178234	-1.27785
5337_64_CD86_B7_2	CTBS_Q01459_OID30710_v1_Inflammation_II	101	Inverse variance weighted	0.101137	0.0392149	1.10643	1.02457	1.19482	0.00990743	97	Inverse variance weighted	0.0250893	0.0100959	1.02541	1.00532	1.0459	0.0129519	10	Inverse variance weighted	0.562248	0.126980411161786	1.75461	1.12704	2.73164	0.0127907	0.101137	0.0250893	0.562248	0.0141064316743545	0.0870304333256455	-0.234775	0.262988037551454	0.139478632982687	-2.32136	2.60031826724562
8253_2_POMGNT1_PMGT1	MATN3_O15232_OID20979_v1_Neurology	89	Inverse variance weighted	-0.0841588	0.0386753	0.919285	0.852176	0.99168	0.0295529	82	Inverse variance weighted	0.0185744	0.00765357	1.01875	1.00358	1.03415	0.0152286	4	Inverse variance weighted	-0.628674	0.195324548994553	0.533299	0.29007	0.980477	0.043026	-0.0841588	0.0185744	-0.628674	-0.0116773	-0.0724815	-0.394513	0.371158860384406	0.138752669268884	4.68772672677514	-4.41022
11441_11_PYGL_PYGL	MILR1_Q7Z6M3_OID20482_v1_Inflammation	114	Inverse variance weighted	0.0790417	0.0362447	1.08225	1.00803	1.16193	0.0291998	111	Inverse variance weighted	-0.025287	0.00986683	0.97503	0.956355	0.99407	0.0103822	26	Inverse variance weighted	-0.433585	0.0777613164460373	0.648181	0.456074	0.921207	0.0156227	0.0790417	-0.025287	-0.433585	0.010964071483715	0.068077632516285	-0.141448	0.163376251717948	0.138712488836462	-1.78954	2.06696267223627
9060_27_IGSF9B_TUTLB	LTB_Q06643_OID31383_v1_Oncology_II	65	Inverse variance weighted	0.203691	0.0727948	1.22592	1.06291	1.41392	0.00513951	77	Inverse variance weighted	-0.0505095	0.017349	0.950745	0.918959	0.98363	0.00359836	6	Inverse variance weighted	-0.556939	0.14302284206107	0.57296	0.346365	0.947795	0.0300986	0.203691	-0.0505095	-0.556939	0.0281306987581424	0.175560718241858	-0.252194	0.308455469197839	0.138104487525571	-1.23812	1.51432727868862
13111_79_BCL6_BCL6	LTB_Q06643_OID31383_v1_Oncology_II	65	Inverse variance weighted	0.203691	0.0727948	1.22592	1.06291	1.41392	0.00513951	77	Inverse variance weighted	-0.0926902	0.0231728	0.911476	0.871004	0.953828	6.34e-05	23	Inverse variance weighted	-0.303377	0.0422907546473946	0.73832	0.562003	0.969954	0.0293226	0.203691	-0.0926902	-0.303377	0.0281201101883562	0.175571306811644	-0.0547698	0.11100998929725	0.138052504138435	-0.268886	0.544991001251907
6600_70_RELL2_RELL2	ITIH4_Q14624_OID30762_v1_Inflammation_II	43	Inverse variance weighted	-0.161842	0.0737425	0.850576	0.736109	0.982842	0.0281859	43	Inverse variance weighted	0.0516974	0.0202585	1.05306	1.01206	1.09571	0.0107143	10	Inverse variance weighted	-0.431535	0.0849586633631739	0.649511	0.441586	0.955339	0.0283732	-0.161842	0.0516974	-0.431535	-0.0223092	-0.139533	-0.188828	0.144209750004715	0.137845867352023	1.1667452539558	-0.891054
4931_59_F3_TF	ADAM23_O75077_OID20651_v1_Inflammation	108	Inverse variance weighted	-0.0661019	0.0288822	0.936035	0.884519	0.990552	0.0220985	104	Inverse variance weighted	0.0261591	0.0073093	1.0265	1.0119	1.04132	0.000345081	13	Inverse variance weighted	-0.347664	0.0593340305816946	0.706336	0.505521	0.986923	0.0416369	-0.0661019	0.0261591	-0.347664	-0.00909458	-0.0570073	-0.125389	0.10720012354795	0.137584140397659	1.89690811922952	-1.62174
13056_18_SLC6A16_S6A16	FST_P19883_OID20770_v1_Inflammation	20	Inverse variance weighted	-0.317046	0.135903	0.728297	0.557989	0.950586	0.019654	19	Inverse variance weighted	0.0575307	0.027668	1.05922	1.00331	1.11824	0.0375878	9	Inverse variance weighted	-0.756233	0.24469717943203	0.469432	0.24897	0.885112	0.0194301	-0.317046	0.0575307	-0.756233	-0.0435066	-0.273539	-0.523113	0.436099901495977	0.137224771291976	1.64995924102235	-1.37551
8815_1_OLFML1_OLFL1	MILR1_Q7Z6M3_OID20482_v1_Inflammation	114	Inverse variance weighted	0.0790417	0.0362447	1.08225	1.00803	1.16193	0.0291998	111	Inverse variance weighted	-0.0217724	0.00984683	0.978463	0.95976	0.99753	0.0270284	9	Inverse variance weighted	-0.49815	0.109647861305554	0.607654	0.394725	0.935444	0.0236242	0.0790417	-0.0217724	-0.49815	0.0108459138777235	0.0681957901222765	-0.204064	0.225755722036609	0.137217612081383	-2.58172	2.85615960451218
8932_1_ENTPD6_ENTP6	ADAM23_O75077_OID20651_v1_Inflammation	108	Inverse variance weighted	-0.0661019	0.0288822	0.936035	0.884519	0.990552	0.0220985	104	Inverse variance weighted	0.0152948	0.00729981	1.01541	1.00099	1.03004	0.03615	18	Inverse variance weighted	-0.590265	0.129851565035325	0.554181	0.360075	0.852922	0.00729302	-0.0661019	0.0152948	-0.590265	-0.009028	-0.0570739	-0.263537	0.245481070359552	0.136576918845563	3.98682895491695	-3.71368
14135_3_RXFP1_RXFP1	PI16_Q6UXB8_OID30676_v1_Inflammation_II	76	Inverse variance weighted	-0.111142	0.055674	0.894812	0.802308	0.997981	0.0459018	76	Inverse variance weighted	0.0306289	0.0135283	1.0311	1.00412	1.05881	0.0235702	9	Inverse variance weighted	-0.489462	0.0999263346555409	0.612956	0.410819	0.914552	0.0165065	-0.111142	0.0306289	-0.489462	-0.0149917	-0.0961501	-0.210847	0.180863951132726	0.134887761121298	1.89710202494337	-1.62733
9092_33_ANGPTL1_ANGL1	KDM3A_Q9Y4C1_OID30426_v1_Inflammation_II	15	Inverse variance weighted	-0.482031	0.205717	0.617528	0.412617	0.9242	0.0191202	18	Inverse variance weighted	0.220848	0.0656514	1.24713	1.09655	1.41839	0.000768338	27	Inverse variance weighted	-0.294243	0.0394930089057487	0.745095	0.583365	0.951663	0.0184313	-0.482031	0.220848	-0.294243	-0.0649831	-0.417048	-0.142389	0.0124232378793165	0.134811005603233	0.295394715697262	-0.0257727
15666_21_BMP2_BMP_2	PSG1_P11464_OID20916_v1_Neurology	155	Inverse variance weighted	0.0677669	0.0228798	1.07012	1.02319	1.1192	0.00305781	152	Inverse variance weighted	-0.0123138	0.0052088	0.987762	0.977729	0.997898	0.018077	4	Inverse variance weighted	-0.739879	0.272900774445334	0.477172	0.231583	0.9832	0.0448632	0.0677669	-0.0123138	-0.739879	0.00911071326037239	0.0586562127396276	-0.525775	0.543996231173227	0.134441884827008	-7.75858	8.0274591645669
9321_400_NMB_NMB	CPA1_P15085_OID20280_v1_Cardiometabolic	78	Inverse variance weighted	-0.151285	0.0687769	0.859602	0.751196	0.983652	0.0278314	78	Inverse variance weighted	-0.0667689	0.0168436	0.935411	0.905034	0.966808	7.37e-05	24	Inverse variance weighted	0.304277	0.0376521970307546	1.35564	1.0638	1.72755	0.0138925	-0.151285	-0.0667689	0.304277	-0.0203162	-0.130969	-0.0941145	0.0534820996805457	0.134290577145126	0.622099023540493	-0.353518
9343_16_IL2RB_IL_2_sRb	LTB_Q06643_OID31383_v1_Oncology_II	65	Inverse variance weighted	0.203691	0.0727948	1.22592	1.06291	1.41392	0.00513951	77	Inverse variance weighted	0.10694	0.0379496	1.11287	1.03309	1.1988	0.00483307	36	Inverse variance weighted	0.25498	0.0260575898821183	1.29044	1.05879	1.57277	0.0115414	0.203691	0.10694	0.25498	0.0272675947428454	0.176423822257155	-0.0238053	0.0783404709117972	0.133867175870476	-0.116869	0.384603691533047
12781_2_TARBP2_TRBP2	LY75_O60449_OID20580_v1_Inflammation	173	Inverse variance weighted	0.115247	0.0206121	1.12215	1.07772	1.16841	2.25e-08	173	Inverse variance weighted	-0.0146503	0.00487936	0.985456	0.976077	0.994926	0.00267768	3	Inverse variance weighted	-1.04794	0.551796868684547	0.35066	0.124932	0.984237	0.0465717	0.115247	-0.0146503	-1.04794	0.0153525935553935	0.0998944194446065	-1.06617	1.09687445617711	0.13321467650874	-9.25117	9.51759553349211
3432_21_EPHA3_EPHA3	MIA_Q16674_OID21531_v1_Oncology	92	Inverse variance weighted	-0.109323	0.0345502	0.896441	0.837745	0.95925	0.0015553	85	Inverse variance weighted	0.0149263	0.00744692	1.01504	1.00033	1.02996	0.0450313	3	Inverse variance weighted	-0.97558	0.41244567158773	0.376974	0.164605	0.863336	0.0210218	-0.109323	0.0149263	-0.97558	-0.0145618	-0.0947607	-0.822955	0.793831691944556	0.13320061135258	7.52777617204364	-7.26137
11465_4_GPR135_GP135	ADAM23_O75077_OID20651_v1_Inflammation	108	Inverse variance weighted	-0.0661019	0.0288822	0.936035	0.884519	0.990552	0.0220985	104	Inverse variance weighted	0.0234762	0.00681472	1.02375	1.01017	1.03752	0.000571229	14	Inverse variance weighted	-0.374775	0.0670737478609668	0.687444	0.484055	0.976293	0.0362546	-0.0661019	0.0234762	-0.374775	-0.00879827	-0.0573037	-0.140263	0.122666276720203	0.133101558243473	2.12191728178421	-1.85571
7898_29_MDM1_MDM1	MILR1_Q7Z6M3_OID20482_v1_Inflammation	114	Inverse variance weighted	0.0790417	0.0362447	1.08225	1.00803	1.16193	0.0291998	111	Inverse variance weighted	-0.0188405	0.0089989	0.981336	0.964179	0.998798	0.0362919	9	Inverse variance weighted	-0.557099	0.131285551256549	0.572869	0.360959	0.909185	0.0180787	0.0790417	-0.0188405	-0.557099	0.0104960054675562	0.0685456985324438	-0.246824	0.267815685930393	0.132790728645681	-3.1227	3.38828330333558
5315_22_TNNT2_Troponin_T	ADAM23_O75077_OID20651_v1_Inflammation	108	Inverse variance weighted	-0.0661019	0.0288822	0.936035	0.884519	0.990552	0.0220985	104	Inverse variance weighted	0.0185124	0.00659196	1.01868	1.00561	1.03193	0.00497998	14	Inverse variance weighted	-0.472326	0.0849172427334292	0.62355	0.438364	0.886968	0.00860993	-0.0661019	0.0185124	-0.472326	-0.00874386	-0.0573581	-0.175182	0.157693936648783	0.132278435779548	2.65017482496061	-2.38562
2997_8_JAM2_JAM_B	ITIH4_Q14624_OID30762_v1_Inflammation_II	43	Inverse variance weighted	-0.161842	0.0737425	0.850576	0.736109	0.982842	0.0281859	43	Inverse variance weighted	0.0496991	0.0178521	1.05095	1.01482	1.08838	0.00537039	11	Inverse variance weighted	-0.428011	0.086441902905463	0.651804	0.438746	0.968326	0.0340587	-0.161842	0.0496991	-0.428011	-0.0212718	-0.14057	-0.190698	0.148154357381831	0.131435548425061	1.17829783833776	-0.915427
8253_2_POMGNT1_PMGT1	CASP4_P49662_OID31276_v1_Oncology_II	7	Inverse variance weighted	-0.496491	0.205301	0.608663	0.407025	0.91019	0.0155906	7	Inverse variance weighted	0.103757	0.0484823	1.10933	1.00877	1.21992	0.0323472	4	Inverse variance weighted	-0.628674	0.195389262136003	0.533299	0.29007	0.980477	0.043026	-0.496491	0.103757	-0.628674	-0.0652291	-0.431262	-0.448192	0.317733860105861	0.131380298378823	0.902719961364169	-0.639959
7898_29_MDM1_MDM1	OGN_P20774_OID21123_v1_Neurology	87	Inverse variance weighted	-0.147658	0.0452421	0.862726	0.789518	0.942722	0.00109951	82	Inverse variance weighted	0.0345226	0.00901046	1.03513	1.01701	1.05357	0.000127419	9	Inverse variance weighted	-0.557099	0.131285810295504	0.572869	0.360959	0.909185	0.0180787	-0.147658	0.0345226	-0.557099	-0.0192325	-0.128426	-0.276553	0.238087676219995	0.130249989543056	1.87292155998941	-1.61242
15585_304_FBLN5_fibulin_5	PKD1_P98161_OID30328_v1_Cardiometabolic_II	61	Inverse variance weighted	-0.161238	0.0676922	0.851089	0.74534	0.971843	0.0172221	55	Inverse variance weighted	0.0463805	0.019759	1.04747	1.00768	1.08883	0.0189096	14	Inverse variance weighted	-0.452193	0.0788691363881496	0.636231	0.452023	0.895509	0.00951967	-0.161238	0.0463805	-0.452193	-0.0209729	-0.140265	-0.175556	0.133610592076565	0.130074112490122	1.08880170406385	-0.828653
9321_400_NMB_NMB	MSR1_P21757_OID21063_v1_Neurology	90	Inverse variance weighted	0.134499	0.0622835	1.14396	1.0125	1.2925	0.0308138	96	Inverse variance weighted	0.0574923	0.0153436	1.05918	1.0278	1.09151	0.00017898	24	Inverse variance weighted	0.304277	0.0376457344383553	1.35564	1.0638	1.72755	0.0138925	0.134499	0.0574923	0.304277	0.0174935531290667	0.117005675870933	-0.0562921	0.0912791926282431	0.130064337610937	-0.418531	0.678659597582103
9092_33_ANGPTL1_ANGL1	ITIH4_Q14624_OID30762_v1_Inflammation_II	43	Inverse variance weighted	-0.161842	0.0737425	0.850576	0.736109	0.982842	0.0281859	43	Inverse variance weighted	0.0714001	0.0222409	1.07401	1.0282	1.12186	0.0013259	27	Inverse variance weighted	-0.294243	0.0367695377014169	0.745095	0.583365	0.951663	0.0184313	-0.161842	0.0714001	-0.294243	-0.021009	-0.140833	-0.0930773	0.0510592967023211	0.129811894713611	0.575112624375173	-0.315489
11358_15_GRB10_GRB10	STAB2_Q8WWQ8_OID30401_v1_Cardiometabolic_II	120	Inverse variance weighted	-0.0957426	0.0483882	0.908698	0.826477	0.999099	0.047857	125	Inverse variance weighted	0.0254067	0.00973543	1.02573	1.00635	1.04549	0.00906181	7	Inverse variance weighted	-0.48913	0.106846460071673	0.61316	0.399607	0.940837	0.0251441	-0.0957426	0.0254067	-0.48913	-0.0124272	-0.0833154	-0.221846	0.196991896461763	0.12979767591527	2.31711126647532	-2.05752
11358_15_GRB10_GRB10	LIPF_P07098_OID30266_v1_Cardiometabolic_II	57	Inverse variance weighted	-0.146122	0.0619149	0.864052	0.765309	0.975535	0.0182726	61	Inverse variance weighted	0.0387567	0.0151386	1.03952	1.00913	1.07082	0.0104634	7	Inverse variance weighted	-0.48913	0.106847784690451	0.61316	0.399607	0.940837	0.0251441	-0.146122	0.0387567	-0.48913	-0.0189571	-0.127165	-0.228379	0.190464586592122	0.129734378679209	1.56292983945405	-1.30346
15585_304_FBLN5_fibulin_5	PDIA5_Q14554_OID31209_v1_Oncology_II	81	Inverse variance weighted	-0.132765	0.0559546	0.875671	0.784714	0.977171	0.0176574	96	Inverse variance weighted	0.0379241	0.0173439	1.03865	1.00394	1.07457	0.0287719	14	Inverse variance weighted	-0.452193	0.0788665547790563	0.636231	0.452023	0.895509	0.00951967	-0.132765	0.0379241	-0.452193	-0.017149	-0.115616	-0.171727	0.137429454041092	0.12916810747166	1.29347000688343	-1.03513
17712_7_IDI1_IDI1	OGN_P20774_OID21123_v1_Neurology	87	Inverse variance weighted	-0.147658	0.0452421	0.862726	0.789518	0.942722	0.00109951	82	Inverse variance weighted	0.0239592	0.00939235	1.02425	1.00557	1.04328	0.0107436	5	Inverse variance weighted	-0.793232	0.235034558908235	0.45238	0.253098	0.808572	0.0074256	-0.147658	0.0239592	-0.793232	-0.0190052	-0.128653	-0.479673	0.441662496044576	0.128710812211777	3.24853041007889	-2.99111
6986_17_HS3ST3B1_HS3SB	ITIH4_Q14624_OID30762_v1_Inflammation_II	43	Inverse variance weighted	-0.161842	0.0737425	0.850576	0.736109	0.982842	0.0281859	43	Inverse variance weighted	0.0622869	0.0210136	1.06427	1.02132	1.10902	0.00303548	24	Inverse variance weighted	-0.332991	0.0489419752785741	0.716777	0.537427	0.95598	0.0234265	-0.161842	0.0622869	-0.332991	-0.020741	-0.141101	-0.116667	0.0751853094298476	0.128155740410515	0.720871849043759	-0.46456
13378_80_C5orf63_YD286	ITIH4_Q14624_OID30762_v1_Inflammation_II	43	Inverse variance weighted	-0.161842	0.0737425	0.850576	0.736109	0.982842	0.0281859	43	Inverse variance weighted	0.0723275	0.0248905	1.07501	1.02382	1.12875	0.00366285	22	Inverse variance weighted	-0.286723	0.0409493863566409	0.75072	0.567578	0.992956	0.0444794	-0.161842	0.0723275	-0.286723	-0.0207379	-0.141104	-0.100999	0.059522851090091	0.128137105260012	0.62405826075234	-0.367784
9095_5_MTFR1_MTFR1	ITIH4_Q14624_OID30762_v1_Inflammation_II	43	Inverse variance weighted	-0.161842	0.0737425	0.850576	0.736109	0.982842	0.0281859	43	Inverse variance weighted	0.0697887	0.0173992	1.07228	1.03633	1.10948	6.05e-05	8	Inverse variance weighted	-0.297139	0.0370569678289589	0.742941	0.581907	0.948538	0.0171316	-0.161842	0.0697887	-0.297139	-0.020737	-0.141105	-0.0933686	0.0518946955569148	0.128131020424227	0.57691269799872	-0.320651
9931_20_KRT1_Keratin_1	MME_P08473_OID21307_v1_Oncology	89	Inverse variance weighted	-0.142375	0.0482966	0.867296	0.788962	0.953406	0.00319901	84	Inverse variance weighted	0.0266752	0.0133036	1.02703	1.0006	1.05417	0.0449506	14	Inverse variance weighted	-0.682915	0.145747067469987	0.505142	0.332467	0.767501	0.0013748	-0.142375	0.0266752	-0.682915	-0.0182169	-0.124159	-0.303881	0.267447334568887	0.127949874778167	2.13436533761236	-1.87847
9783_75_DNAJC11_DJC11	MME_P08473_OID21307_v1_Oncology	89	Inverse variance weighted	-0.142375	0.0482966	0.867296	0.788962	0.953406	0.00319901	84	Inverse variance weighted	0.0290574	0.013124	1.02948	1.00334	1.05631	0.0268245	7	Inverse variance weighted	-0.624264	0.174755065266816	0.535655	0.309456	0.927198	0.0257463	-0.142375	0.0290574	-0.624264	-0.0181395	-0.124236	-0.360659	0.324380415571028	0.127406204261295	2.53315797166576	-2.27835
8253_2_POMGNT1_PMGT1	PI16_Q6UXB8_OID30676_v1_Inflammation_II	76	Inverse variance weighted	-0.111142	0.055674	0.894812	0.802308	0.997981	0.0459018	76	Inverse variance weighted	0.0224416	0.0112618	1.0227	1.00037	1.04552	0.0462918	4	Inverse variance weighted	-0.628674	0.195324660765948	0.533299	0.29007	0.980477	0.043026	-0.111142	0.0224416	-0.628674	-0.0141084	-0.0970334	-0.396945	0.368727917890952	0.126940725853348	3.57151721777089	-3.31764
15585_304_FBLN5_fibulin_5	KDM3A_Q9Y4C1_OID30426_v1_Inflammation_II	15	Inverse variance weighted	-0.482031	0.205717	0.617528	0.412617	0.9242	0.0191202	18	Inverse variance weighted	0.134946	0.0532904	1.14448	1.03097	1.27048	0.0113323	14	Inverse variance weighted	-0.452193	0.0791910102930745	0.636231	0.452023	0.895509	0.00951967	-0.482031	0.134946	-0.452193	-0.0610217	-0.421009	-0.216236	0.0941926409272651	0.126593024170448	0.448593970446925	-0.195408
5708_1_LEAP2_LEAP2	ITIH4_Q14624_OID30762_v1_Inflammation_II	43	Inverse variance weighted	-0.161842	0.0737425	0.850576	0.736109	0.982842	0.0281859	43	Inverse variance weighted	0.0846789	0.0398215	1.08837	1.00665	1.17672	0.0334648	50	Inverse variance weighted	-0.241684	0.0187070816792174	0.785305	0.676442	0.911687	0.0015015	-0.161842	0.0846789	-0.241684	-0.0204655	-0.141376	-0.0571314	0.0162003761162064	0.126453719943634	0.353007482714302	-0.1001
9959_60_TMEM59L_TM59L	PDLIM7_Q9NR12_OID20729_v1_Inflammation	6	Inverse variance weighted	-0.666372	0.299942	0.513569	0.285287	0.924516	0.0263059	6	Inverse variance weighted	0.277497	0.124749	1.31982	1.03354	1.6854	0.026119	17	Inverse variance weighted	-0.302982	0.0573610776867364	0.738612	0.549438	0.992921	0.0447429	-0.666372	0.277497	-0.302982	-0.0840765	-0.582295	-0.196504	0.0283511833976424	0.126170655360202	0.294886922886655	-0.0425456
5005_4_MAPK12_MK12	PDLIM7_Q9NR12_OID20729_v1_Inflammation	6	Inverse variance weighted	-0.666372	0.299942	0.513569	0.285287	0.924516	0.0263059	6	Inverse variance weighted	0.326178	0.128072	1.38566	1.07805	1.78104	0.0108704	23	Inverse variance weighted	-0.257155	0.0511122361665948	0.773248	0.617777	0.967846	0.0247444	-0.666372	0.326178	-0.257155	-0.0838784	-0.582493	-0.184058	0.016301537553272	0.125873398447043	0.276209934278071	-0.0244631
6604_59_NDNF_CD031	PI16_Q6UXB8_OID30676_v1_Inflammation_II	76	Inverse variance weighted	-0.111142	0.055674	0.894812	0.802308	0.997981	0.0459018	76	Inverse variance weighted	0.0276249	0.0123856	1.02801	1.00335	1.05327	0.0257202	12	Inverse variance weighted	-0.505369	0.106469533672541	0.603283	0.3992	0.911699	0.0164488	-0.111142	0.0276249	-0.505369	-0.0139608	-0.097181	-0.222641	0.194719517775152	0.12561225155767	2.00321670434776	-1.75199
15305_7_SCGN_Secretagogin	MILR1_Q7Z6M3_OID20482_v1_Inflammation	114	Inverse variance weighted	0.0790417	0.0362447	1.08225	1.00803	1.16193	0.0291998	111	Inverse variance weighted	-0.0264432	0.00960473	0.973903	0.955741	0.992411	0.00590265	12	Inverse variance weighted	-0.372615	0.0672525215180453	0.688931	0.483662	0.981316	0.0389704	0.0790417	-0.0264432	-0.372615	0.00985311469795968	0.0691885893020403	-0.121962	0.141668056873329	0.124657164500903	-1.54301	1.79232037904103
17857_6_ACADL_ACADL	CASP4_P49662_OID31276_v1_Oncology_II	7	Inverse variance weighted	-0.496491	0.205301	0.608663	0.407025	0.91019	0.0155906	7	Inverse variance weighted	0.0849762	0.0414469	1.08869	1.00375	1.18082	0.040341	8	Inverse variance weighted	-0.72782	0.179589254599398	0.482961	0.297793	0.783265	0.00317572	-0.496491	0.0849762	-0.72782	-0.0618473	-0.434643	-0.413842	0.290147593661373	0.124568995642471	0.833534849774558	-0.584397
9095_5_MTFR1_MTFR1	TSC1_Q92574_OID30478_v1_Inflammation_II	7	Inverse variance weighted	-0.535904	0.247104	0.58514	0.360513	0.949728	0.0301026	8	Inverse variance weighted	0.222011	0.0713163	1.24859	1.08571	1.4359	0.00185162	8	Inverse variance weighted	-0.297139	0.0402793909959087	0.742941	0.581907	0.948538	0.0171316	-0.535904	0.222011	-0.297139	-0.0659683	-0.469936	-0.144916	0.0129793291556903	0.123097166703167	0.270413832727487	-0.0242195
10024_44_HOGA1_HOGA1	ADAM23_O75077_OID20651_v1_Inflammation	108	Inverse variance weighted	-0.0661019	0.0288822	0.936035	0.884519	0.990552	0.0220985	104	Inverse variance weighted	0.0203247	0.00633036	1.02053	1.00795	1.03327	0.00132424	10	Inverse variance weighted	-0.397527	0.0760653135528813	0.67198	0.461827	0.977763	0.0377531	-0.0661019	0.0203247	-0.397527	-0.00807962	-0.0580223	-0.157168	0.141008397561109	0.122229679767548	2.3776559297455	-2.1332
5491_12_SPOCK2_Testican_2	DDR1_Q08345_OID21009_v1_Neurology	115	Inverse variance weighted	0.179072	0.0459826	1.19611	1.09302	1.30891	9.85e-05	140	Inverse variance weighted	0.105851	0.0176372	1.11166	1.07388	1.15076	1.95e-09	47	Inverse variance weighted	0.205713	0.0194203617281448	1.2284	1.02177	1.47682	0.0285836	0.179072	0.105851	0.205713	0.0217749225090403	0.15729743349096	-0.016289	0.059838831496204	0.12159845883214	-0.0909632	0.334160072681481
6986_17_HS3ST3B1_HS3SB	ADAM23_O75077_OID20651_v1_Inflammation	108	Inverse variance weighted	-0.0661019	0.0288822	0.936035	0.884519	0.990552	0.0220985	104	Inverse variance weighted	0.0240349	0.00749371	1.02433	1.00939	1.03948	0.00133969	24	Inverse variance weighted	-0.332991	0.0489248018068687	0.716777	0.537427	0.95598	0.0234265	-0.0661019	0.0240349	-0.332991	-0.00800339	-0.0580985	-0.103896	0.0878892264837844	0.121076431265121	1.57175450141423	-1.3296
11358_15_GRB10_GRB10	PI16_Q6UXB8_OID30676_v1_Inflammation_II	76	Inverse variance weighted	-0.111142	0.055674	0.894812	0.802308	0.997981	0.0459018	76	Inverse variance weighted	0.0274457	0.0124125	1.02783	1.00312	1.05314	0.0270263	7	Inverse variance weighted	-0.48913	0.106846716867167	0.61316	0.399607	0.940837	0.0251441	-0.111142	0.0274457	-0.48913	-0.0134245	-0.0977173	-0.222844	0.195995066368637	0.120787157244624	2.00504328607121	-1.76347
2833_20_KLK4_Kallikrein_4	OGN_P20774_OID21123_v1_Neurology	87	Inverse variance weighted	-0.147658	0.0452421	0.862726	0.789518	0.942722	0.00109951	82	Inverse variance weighted	0.0302722	0.00906276	1.03074	1.01259	1.04921	0.000836928	5	Inverse variance weighted	-0.587481	0.151091897082466	0.555725	0.335691	0.919985	0.0223556	-0.147658	0.0302722	-0.587481	-0.0177843	-0.129874	-0.313924	0.278355779565489	0.120442401737365	2.12601751284619	-1.88513
17231_1_LCP1_L_plastin	CD27_P26842_OID21527_v1_Oncology	42	Inverse variance weighted	0.179611	0.0807451	1.19675	1.02158	1.40196	0.02612	44	Inverse variance weighted	0.0787203	0.0263066	1.0819	1.02753	1.13915	0.00276781	19	Inverse variance weighted	0.274412	0.0276607484387471	1.31576	1.08047	1.60228	0.00633356	0.179611	0.0787203	0.274412	0.0216017604996407	0.158009496500359	-0.0326133	0.0758168274395851	0.120269524641436	-0.181577	0.422116234282493
15585_304_FBLN5_fibulin_5	C1RL_Q9NZP8_OID30721_v1_Inflammation_II	56	Inverse variance weighted	-0.112481	0.057157	0.893614	0.798908	0.999547	0.0490756	51	Inverse variance weighted	0.0297	0.0127054	1.03015	1.00481	1.05612	0.0194083	14	Inverse variance weighted	-0.452193	0.0788647146683808	0.636231	0.452023	0.895509	0.00951967	-0.112481	0.0297	-0.452193	-0.0134301	-0.0990511	-0.168005	0.141144728985324	0.11939866571281	1.49362622700759	-1.25483
11465_4_GPR135_GP135	LTB_Q06643_OID31383_v1_Oncology_II	65	Inverse variance weighted	0.203691	0.0727948	1.22592	1.06291	1.41392	0.00513951	77	Inverse variance weighted	-0.0648887	0.0185294	0.937172	0.903747	0.971833	0.00046189	14	Inverse variance weighted	-0.374775	0.0670843327387501	0.687444	0.484055	0.976293	0.0362546	0.203691	-0.0648887	-0.374775	0.0243186529206943	0.179372764079306	-0.107167	0.155803945088645	0.119389679147327	-0.526123	0.764901866673374
9095_5_MTFR1_MTFR1	PI16_Q6UXB8_OID30676_v1_Inflammation_II	76	Inverse variance weighted	-0.111142	0.055674	0.894812	0.802308	0.997981	0.0459018	76	Inverse variance weighted	0.0446526	0.0131242	1.04566	1.01911	1.07291	0.000668161	8	Inverse variance weighted	-0.297139	0.0370417040800366	0.742941	0.581907	0.948538	0.0171316	-0.111142	0.0446526	-0.297139	-0.013268	-0.0978737	-0.0858698	0.0593337015566881	0.119379403454029	0.772614804423448	-0.533856
9294_45_MFAP2_MFAP2	FST_P19883_OID20770_v1_Inflammation	20	Inverse variance weighted	-0.317046	0.135903	0.728297	0.557989	0.950586	0.019654	19	Inverse variance weighted	-0.144441	0.0325028	0.865506	0.812088	0.922438	8.83e-06	29	Inverse variance weighted	0.261103	0.0274574494034308	1.29836	1.05974	1.59071	0.0117343	-0.317046	-0.144441	0.261103	-0.037714	-0.279332	-0.0915306	0.0161026266242439	0.118954251330295	0.288698055733177	-0.0507896
5315_22_TNNT2_Troponin_T	ITIH4_Q14624_OID30762_v1_Inflammation_II	43	Inverse variance weighted	-0.161842	0.0737425	0.850576	0.736109	0.982842	0.0281859	43	Inverse variance weighted	0.0404238	0.0182003	1.04125	1.00476	1.07907	0.0263477	14	Inverse variance weighted	-0.472326	0.0849203421741372	0.62355	0.438364	0.886968	0.00860993	-0.161842	0.0404238	-0.472326	-0.0190932	-0.142749	-0.185537	0.147350675233724	0.117974401723564	1.14640969618732	-0.910461
5005_4_MAPK12_MK12	ADAM23_O75077_OID20651_v1_Inflammation	108	Inverse variance weighted	-0.0661019	0.0288822	0.936035	0.884519	0.990552	0.0220985	104	Inverse variance weighted	0.0300679	0.0058941	1.03052	1.01869	1.0425	3.37e-07	23	Inverse variance weighted	-0.257155	0.029451726098301	0.773248	0.617777	0.967846	0.0247444	-0.0661019	0.0300679	-0.257155	-0.00773212	-0.0583698	-0.0654575	0.0499932680442411	0.116972618050103	0.990251029018443	-0.756306
9959_60_TMEM59L_TM59L	ADAM23_O75077_OID20651_v1_Inflammation	108	Inverse variance weighted	-0.0661019	0.0288822	0.936035	0.884519	0.990552	0.0220985	104	Inverse variance weighted	0.0254994	0.00729877	1.02583	1.01126	1.04061	0.000476445	17	Inverse variance weighted	-0.302982	0.045737926580185	0.738612	0.549438	0.992921	0.0447429	-0.0661019	0.0254994	-0.302982	-0.00772587	-0.058376	-0.0973722	0.0819204612061945	0.116878215087477	1.47306167651233	-1.23931
11275_94_LRP1B_LRP1B	SLMAP_Q14BN4_OID31441_v1_Oncology_II	4	Inverse variance weighted	-1.26651	0.364859	0.281812	0.137843	0.576148	0.00051806	4	Inverse variance weighted	0.649107	0.276856	1.91383	1.11234	3.29282	0.0190494	21	Inverse variance weighted	-0.227723	0.181309861474159	0.796345	0.647513	0.979386	0.0309804	-1.26651	0.649107	-0.227723	-0.147817	-1.1187	-0.503184	0.207550749702624	0.116711285200443	0.397298063535243	-0.163875
8363_18_KIAA1324L_K132L	ITIH4_Q14624_OID30762_v1_Inflammation_II	43	Inverse variance weighted	-0.161842	0.0737425	0.850576	0.736109	0.982842	0.0281859	43	Inverse variance weighted	0.0460366	0.0227708	1.04711	1.00141	1.0949	0.0432033	14	Inverse variance weighted	-0.409961	0.0697711558573677	0.663676	0.475449	0.926422	0.0159914	-0.161842	0.0460366	-0.409961	-0.0188732	-0.142969	-0.155625	0.117878288990706	0.11661493297151	0.961584670282599	-0.728355
9095_5_MTFR1_MTFR1	KDM3A_Q9Y4C1_OID30426_v1_Inflammation_II	15	Inverse variance weighted	-0.482031	0.205717	0.617528	0.412617	0.9242	0.0191202	18	Inverse variance weighted	0.188463	0.0394326	1.20739	1.11759	1.30441	1.76e-06	8	Inverse variance weighted	-0.297139	0.0377752940966512	0.742941	0.581907	0.948538	0.0171316	-0.482031	0.188463	-0.297139	-0.0559997	-0.426031	-0.130039	0.0180398353485416	0.116174607011425	0.269773865310793	-0.0374247
8253_2_POMGNT1_PMGT1	PSG1_P11464_OID20916_v1_Neurology	155	Inverse variance weighted	0.0677669	0.0228798	1.07012	1.02319	1.1192	0.00305781	152	Inverse variance weighted	-0.0124967	0.00474042	0.987581	0.978448	0.9968	0.00838415	4	Inverse variance weighted	-0.628674	0.195324506244259	0.533299	0.29007	0.980477	0.043026	0.0677669	-0.0124967	-0.628674	0.00785633072347379	0.0599105952765262	-0.37498	0.390692362962222	0.115931637853454	-5.53337	5.76523661353951
12716_3_ZNF175_ZN175	PI16_Q6UXB8_OID30676_v1_Inflammation_II	76	Inverse variance weighted	-0.111142	0.055674	0.894812	0.802308	0.997981	0.0459018	76	Inverse variance weighted	0.0402076	0.0123596	1.04103	1.01611	1.06655	0.00114134	20	Inverse variance weighted	-0.317788	0.0432610075242053	0.727757	0.557335	0.95029	0.0195657	-0.111142	0.0402076	-0.317788	-0.0127775	-0.0983643	-0.0975691	0.0720140616517513	0.114965893252908	0.877879541484487	-0.647948
6119_14_MAMDC2_MAMC2	SLMAP_Q14BN4_OID31441_v1_Oncology_II	4	Inverse variance weighted	-1.26651	0.364859	0.281812	0.137843	0.576148	0.00051806	4	Inverse variance weighted	0.162641	0.0758912	1.17661	1.01399	1.36532	0.0321067	6	Inverse variance weighted	-0.892482	0.372937881224973	0.409638	0.180676	0.928751	0.0325994	-1.26651	0.162641	-0.892482	-0.145154	-1.12136	-0.876112	0.585804094553917	0.114609117912674	0.691750580385389	-0.462532
15305_7_SCGN_Secretagogin	PDIA5_Q14554_OID31209_v1_Oncology_II	81	Inverse variance weighted	-0.132765	0.0559546	0.875671	0.784714	0.977171	0.0176574	96	Inverse variance weighted	0.0408105	0.0128425	1.04165	1.01576	1.06821	0.00148407	12	Inverse variance weighted	-0.372615	0.06725408414725	0.688931	0.483662	0.981316	0.0389704	-0.132765	0.0408105	-0.372615	-0.0152066	-0.117558	-0.147025	0.116611392752736	0.114537878608382	1.10740561747704	-0.87833
8932_1_ENTPD6_ENTP6	RTN4R_Q9BZR6_OID21424_v1_Oncology	65	Inverse variance weighted	0.166198	0.0544379	1.18081	1.06131	1.31376	0.00226572	63	Inverse variance weighted	-0.0322321	0.0132632	0.968282	0.943435	0.993783	0.0150913	18	Inverse variance weighted	-0.590265	0.129852220751721	0.554181	0.360075	0.852922	0.00729302	0.166198	-0.0322321	-0.590265	0.0190254454313742	0.147172878568626	-0.235485	0.273535798104747	0.114474351927726	-1.41689	1.64583969032532
11327_56_CLK2_CLK2	KDM3A_Q9Y4C1_OID30426_v1_Inflammation_II	15	Inverse variance weighted	-0.482031	0.205717	0.617528	0.412617	0.9242	0.0191202	18	Inverse variance weighted	0.425815	0.0996137	1.53084	1.25932	1.86089	1.91e-05	73	Inverse variance weighted	-0.129043	0.0432177567073889	0.878936	0.775055	0.996741	0.0443391	-0.482031	0.425815	-0.129043	-0.0549485	-0.427082	-0.139655	0.0297583157678366	0.113993722182838	0.289722741224571	-0.0617353
11358_15_GRB10_GRB10	MME_P08473_OID21307_v1_Oncology	89	Inverse variance weighted	-0.142375	0.0482966	0.867296	0.788962	0.953406	0.00319901	84	Inverse variance weighted	0.033122	0.0143805	1.03368	1.00495	1.06323	0.0212647	7	Inverse variance weighted	-0.48913	0.106847235452566	0.61316	0.399607	0.940837	0.0251441	-0.142375	0.033122	-0.48913	-0.016201	-0.126174	-0.225622	0.193219620582587	0.113790431306753	1.58469443709239	-1.35711
5005_4_MAPK12_MK12	CRELD2_Q6UXH1_OID20751_v1_Inflammation	73	Inverse variance weighted	-0.154382	0.0591511	0.856944	0.763136	0.962283	0.00905502	71	Inverse variance weighted	0.0682092	0.024362	1.07059	1.02067	1.12295	0.00511303	23	Inverse variance weighted	-0.257155	0.0294980345769961	0.773248	0.617777	0.967846	0.0247444	-0.154382	0.0682092	-0.257155	-0.0175404	-0.136842	-0.0753565	0.0402757874214028	0.113616260875438	0.48811566664942	-0.260883
11441_11_PYGL_PYGL	KDM3A_Q9Y4C1_OID30426_v1_Inflammation_II	15	Inverse variance weighted	-0.482031	0.205717	0.617528	0.412617	0.9242	0.0191202	18	Inverse variance weighted	0.126267	0.037557	1.13458	1.05407	1.22125	0.000773787	26	Inverse variance weighted	-0.433585	0.0779053818896602	0.648181	0.456074	0.921207	0.0156227	-0.482031	0.126267	-0.433585	-0.0547474	-0.427283	-0.207442	0.0979471980971508	0.113576452241338	0.430349866239501	-0.203197
9294_45_MFAP2_MFAP2	STAB2_Q8WWQ8_OID30401_v1_Cardiometabolic_II	120	Inverse variance weighted	-0.0957426	0.0483882	0.908698	0.826477	0.999099	0.047857	125	Inverse variance weighted	-0.0414302	0.0113285	0.959416	0.938348	0.980957	0.00025501	29	Inverse variance weighted	0.261103	0.0270571855047825	1.29836	1.05974	1.59071	0.0117343	-0.0957426	-0.0414302	0.261103	-0.0108175	-0.084925	-0.0638496	0.0422145449044232	0.112985652716387	0.666888416899829	-0.440917
5337_64_CD86_B7_2	CES1_P23141_OID20244_v1_Cardiometabolic	56	Inverse variance weighted	-0.134492	0.0621073	0.87416	0.77397	0.987319	0.0303509	57	Inverse variance weighted	-0.0269997	0.0135036	0.973362	0.947937	0.999467	0.0455601	10	Inverse variance weighted	0.562248	0.126980681937296	1.75461	1.12704	2.73164	0.0127907	-0.134492	-0.0269997	0.562248	-0.0151805	-0.119312	-0.264063	0.233701618052943	0.112872873967653	1.96340531495193	-1.73766
15585_304_FBLN5_fibulin_5	PSG1_P11464_OID20916_v1_Neurology	155	Inverse variance weighted	0.0677669	0.0228798	1.07012	1.02319	1.1192	0.00305781	152	Inverse variance weighted	-0.0168636	0.00499266	0.983278	0.973703	0.992947	0.00073099	14	Inverse variance weighted	-0.452193	0.0788638568460139	0.636231	0.452023	0.895509	0.00951967	0.0677669	-0.0168636	-0.452193	0.00762561131713734	0.0601413146828627	-0.146948	0.162198770735325	0.11252703593398	-2.16843	2.3934798331464
5070_76_TNFRSF6B_DcR3	TMPRSS5_Q9H3S3_OID20947_v1_Neurology	131	Inverse variance weighted	-0.109767	0.0340903	0.896043	0.838128	0.957959	0.00128243	126	Inverse variance weighted	0.0130595	0.00644273	1.01315	1.00043	1.02602	0.0426605	5	Inverse variance weighted	-0.942219	0.304128011422271	0.389762	0.207036	0.73376	0.00351053	-0.109767	0.0130595	-0.942219	-0.0123049	-0.0974619	-0.608396	0.58378595834993	0.112100709783569	5.54261815450665	-5.31842
11441_11_PYGL_PYGL	TSC1_Q92574_OID30478_v1_Inflammation_II	7	Inverse variance weighted	-0.535904	0.247104	0.58514	0.360513	0.949728	0.0301026	8	Inverse variance weighted	0.138394	0.059119	1.14843	1.02278	1.28952	0.0192354	26	Inverse variance weighted	-0.433585	0.0781901560912799	0.648181	0.456074	0.921207	0.0156227	-0.535904	0.138394	-0.433585	-0.0600055	-0.475899	-0.213258	0.0932472104175562	0.111970583426323	0.397940972414046	-0.174
7009_8_CD72_CD72	PSG1_P11464_OID20916_v1_Neurology	155	Inverse variance weighted	0.0677669	0.0228798	1.07012	1.02319	1.1192	0.00305781	152	Inverse variance weighted	-0.0155434	0.00479226	0.984577	0.975372	0.993868	0.00118099	19	Inverse variance weighted	-0.487314	0.0778161975085172	0.614274	0.449197	0.840016	0.00227513	0.0677669	-0.0155434	-0.487314	0.00757450982482162	0.0601924161751784	-0.144945	0.160094256941515	0.11177295875604	-2.13888	2.36242
5618_50_FAM3B_FAM3B	TSC1_Q92574_OID30478_v1_Inflammation_II	7	Inverse variance weighted	-0.535904	0.247104	0.58514	0.360513	0.949728	0.0301026	8	Inverse variance weighted	0.245003	0.0440526	1.27763	1.17194	1.39284	2.67e-08	24	Inverse variance weighted	-0.24266	0.0273790857847806	0.784538	0.64025	0.961343	0.0192733	-0.535904	0.245003	-0.24266	-0.0594526	-0.476452	-0.113116	-0.00578956	0.110938823862951	0.211074291080353	0.0108033566455478
15447_45_SORD_Sorbitol_dehydrogenase	ITIH4_Q14624_OID30762_v1_Inflammation_II	43	Inverse variance weighted	-0.161842	0.0737425	0.850576	0.736109	0.982842	0.0281859	43	Inverse variance weighted	0.0813338	0.020554	1.08473	1.0419	1.12932	7.59e-05	46	Inverse variance weighted	-0.219927	0.0193354631425473	0.802577	0.675974	0.952892	0.0120419	-0.161842	0.0813338	-0.219927	-0.0178875	-0.143954	-0.055785	0.0200100162009005	0.110524512408207	0.344688344318141	-0.123639
7898_29_MDM1_MDM1	MME_P08473_OID21307_v1_Oncology	89	Inverse variance weighted	-0.142375	0.0482966	0.867296	0.788962	0.953406	0.00319901	84	Inverse variance weighted	0.0282167	0.0130718	1.02862	1.0026	1.05531	0.0308814	9	Inverse variance weighted	-0.557099	0.13128595990937	0.572869	0.360959	0.909185	0.0180787	-0.142375	0.0282167	-0.557099	-0.0157195	-0.126656	-0.27304	0.241600965789949	0.110408911810628	1.91774668256498	-1.69693
9369_174_LRRC4C_NGL1	DPP6_P42658_OID21354_v1_Oncology	45	Inverse variance weighted	-0.213294	0.0793609	0.807918	0.691535	0.943889	0.00719566	46	Inverse variance weighted	0.0780684	0.0203175	1.0812	1.03899	1.12512	0.000121823	20	Inverse variance weighted	-0.300066	0.0380358188433419	0.740769	0.577934	0.949484	0.017822	-0.213294	0.0780684	-0.300066	-0.0234257	-0.189869	-0.0979759	0.051124522750276	0.10982794633532	0.459345874684867	-0.23969
12716_3_ZNF175_ZN175	ADAM23_O75077_OID20651_v1_Inflammation	108	Inverse variance weighted	-0.0661019	0.0288822	0.936035	0.884519	0.990552	0.0220985	104	Inverse variance weighted	0.0227842	0.00705662	1.02305	1.00899	1.03729	0.00124326	20	Inverse variance weighted	-0.317788	0.0432584519154652	0.727757	0.557335	0.95029	0.0195657	-0.0661019	0.0227842	-0.317788	-0.00724054	-0.0588614	-0.0920271	0.0775460261322052	0.109535989029708	1.39220010262361	-1.17313
7738_299_STX2_STX2	KDM3A_Q9Y4C1_OID30426_v1_Inflammation_II	15	Inverse variance weighted	-0.482031	0.205717	0.617528	0.412617	0.9242	0.0191202	18	Inverse variance weighted	0.266085	0.0596106	1.30485	1.16096	1.46656	8.06e-06	52	Inverse variance weighted	-0.198132	0.0215562589360734	0.820262	0.709968	0.94769	0.00716146	-0.482031	0.266085	-0.198132	-0.0527197	-0.429311	-0.09497	-0.0104695	0.109370069344438	0.197020621470345	0.0217195172185305
8363_18_KIAA1324L_K132L	ADAM23_O75077_OID20651_v1_Inflammation	108	Inverse variance weighted	-0.0661019	0.0288822	0.936035	0.884519	0.990552	0.0220985	104	Inverse variance weighted	0.0176326	0.00676386	1.01779	1.00438	1.03137	0.0091372	14	Inverse variance weighted	-0.409961	0.0697633822620275	0.663676	0.475449	0.926422	0.0159914	-0.0661019	0.0176326	-0.409961	-0.00722866	-0.0588733	-0.143965	0.129507573501238	0.109356207730596	2.17792276312426	-1.95921
13378_80_C5orf63_YD286	ADAM23_O75077_OID20651_v1_Inflammation	108	Inverse variance weighted	-0.0661019	0.0288822	0.936035	0.884519	0.990552	0.0220985	104	Inverse variance weighted	0.0251952	0.00756049	1.02552	1.01043	1.04083	0.000860749	22	Inverse variance weighted	-0.286723	0.0409102379597752	0.75072	0.567578	0.992956	0.0444794	-0.0661019	0.0251952	-0.286723	-0.00722404	-0.0588779	-0.0874081	0.0729600268493488	0.109286373446719	1.32232317402698	-1.10375
9321_400_NMB_NMB	CD27_P26842_OID21527_v1_Oncology	42	Inverse variance weighted	0.179611	0.0807451	1.19675	1.02158	1.40196	0.02612	44	Inverse variance weighted	0.0642821	0.0170536	1.06639	1.03134	1.10264	0.000163627	24	Inverse variance weighted	0.304277	0.037651359754845	1.35564	1.0638	1.72755	0.0138925	0.179611	0.0642821	0.304277	0.0195595471513859	0.160051709848614	-0.0542371	0.0933562122708821	0.108899338928327	-0.301969	0.519768158355922
5315_22_TNNT2_Troponin_T	PSG1_P11464_OID20916_v1_Neurology	155	Inverse variance weighted	0.0677669	0.0228798	1.07012	1.02319	1.1192	0.00305781	152	Inverse variance weighted	-0.0155905	0.00492683	0.98453	0.975069	0.994084	0.00155398	14	Inverse variance weighted	-0.472326	0.0849171897881634	0.62355	0.438364	0.886968	0.00860993	0.0677669	-0.0155905	-0.472326	0.00736378889815883	0.0604031371018412	-0.159074	0.173801480882959	0.10866346362175	-2.34737	2.56469477283002
9369_174_LRRC4C_NGL1	PKD1_P98161_OID30328_v1_Cardiometabolic_II	61	Inverse variance weighted	-0.161238	0.0676922	0.851089	0.74534	0.971843	0.0172221	55	Inverse variance weighted	0.0577775	0.0192679	1.05948	1.02021	1.10026	0.00271186	20	Inverse variance weighted	-0.300066	0.0380190342010309	0.740769	0.577934	0.949484	0.017822	-0.161238	0.0577775	-0.300066	-0.0173371	-0.143901	-0.0918544	0.0571802403865141	0.107524563519097	0.569681229139572	-0.354632
9095_5_MTFR1_MTFR1	LTB_Q06643_OID31383_v1_Oncology_II	65	Inverse variance weighted	0.203691	0.0727948	1.22592	1.06291	1.41392	0.00513951	77	Inverse variance weighted	-0.0730595	0.014366	0.929546	0.903737	0.956091	3.66e-07	8	Inverse variance weighted	-0.297139	0.0370519366327125	0.742941	0.581907	0.948538	0.0171316	0.203691	-0.0730595	-0.297139	0.0217088283969568	0.181982588603043	-0.050913	0.0943306241970733	0.106577040489422	-0.249951	0.463105542621235
17231_1_LCP1_L_plastin	ICAM3_P32942_OID20277_v1_Cardiometabolic	168	Inverse variance weighted	0.171889	0.0444226	1.18755	1.08852	1.29558	0.000109099	181	Inverse variance weighted	0.0663701	0.0128689	1.06862	1.04201	1.09592	2.5e-07	19	Inverse variance weighted	0.274412	0.0275963409058576	1.31576	1.08047	1.60228	0.00633356	0.171889	0.0663701	0.274412	0.0182127230447034	0.153676503955297	-0.0358761	0.0723015512201842	0.105956163527941	-0.208716	0.420628753075865
15585_304_FBLN5_fibulin_5	CCL21_O00585_OID20686_v1_Inflammation	52	Inverse variance weighted	-0.245225	0.0979352	0.782528	0.645856	0.948122	0.0122814	50	Inverse variance weighted	0.0572429	0.0263572	1.05891	1.0056	1.11505	0.0298699	14	Inverse variance weighted	-0.452193	0.0788782428049335	0.636231	0.452023	0.895509	0.00951967	-0.245225	0.0572429	-0.452193	-0.0258848	-0.21934	-0.180486	0.128716540188326	0.105555306706731	0.736001886751897	-0.524891
11441_11_PYGL_PYGL	CRELD2_Q6UXH1_OID20751_v1_Inflammation	73	Inverse variance weighted	-0.154382	0.0591511	0.856944	0.763136	0.962283	0.00905502	71	Inverse variance weighted	0.0374988	0.0143434	1.03821	1.00943	1.06781	0.00893938	26	Inverse variance weighted	-0.433585	0.0777627762975352	0.648181	0.456074	0.921207	0.0156227	-0.154382	0.0374988	-0.433585	-0.0162589	-0.138124	-0.168674	0.136156115919484	0.105315871419172	1.09257193550531	-0.88194
17857_6_ACADL_ACADL	LY75_O60449_OID20580_v1_Inflammation	173	Inverse variance weighted	0.115247	0.0206121	1.12215	1.07772	1.16841	2.25e-08	173	Inverse variance weighted	-0.0165988	0.00548376	0.983538	0.973024	0.994166	0.00247072	8	Inverse variance weighted	-0.72782	0.179554738600486	0.482961	0.297793	0.783265	0.00317572	0.115247	-0.0165988	-0.72782	0.0120809449762099	0.10316606802379	-0.339846	0.364008232633162	0.104826534430093	-2.94885	3.15850470357233
13430_50_SLC14A1_UT1	PI16_Q6UXB8_OID30676_v1_Inflammation_II	76	Inverse variance weighted	-0.111142	0.055674	0.894812	0.802308	0.997981	0.0459018	76	Inverse variance weighted	0.0268186	0.0119791	1.02718	1.00335	1.05158	0.0251699	10	Inverse variance weighted	-0.434122	0.0941042958465738	0.647833	0.423591	0.990786	0.045209	-0.111142	0.0268186	-0.434122	-0.0116425	-0.0994992	-0.196087	0.172801891650906	0.104753847260769	1.76429567874502	-1.55479
9321_400_NMB_NMB	FST_P19883_OID20770_v1_Inflammation	20	Inverse variance weighted	-0.317046	0.135903	0.728297	0.557989	0.950586	0.019654	19	Inverse variance weighted	-0.109014	0.0345433	0.896718	0.838015	0.959532	0.00160017	24	Inverse variance weighted	0.304277	0.0378233224167493	1.35564	1.0638	1.72755	0.0138925	-0.317046	-0.109014	0.304277	-0.0331705	-0.283876	-0.107304	0.0409632124295575	0.104623604861599	0.338449935481136	-0.129203
4931_59_F3_TF	ITIH4_Q14624_OID30762_v1_Inflammation_II	43	Inverse variance weighted	-0.161842	0.0737425	0.850576	0.736109	0.982842	0.0281859	43	Inverse variance weighted	0.0485371	0.0222174	1.04973	1.005	1.09646	0.0289152	13	Inverse variance weighted	-0.347664	0.0593435212091192	0.706336	0.505521	0.986923	0.0416369	-0.161842	0.0485371	-0.347664	-0.0168746	-0.144967	-0.133188	0.0994386671489794	0.104266198272537	0.822951146386227	-0.614419
9343_16_IL2RB_IL_2_sRb	STAB2_Q8WWQ8_OID30401_v1_Cardiometabolic_II	120	Inverse variance weighted	-0.0957426	0.0483882	0.908698	0.826477	0.999099	0.047857	125	Inverse variance weighted	-0.0390572	0.0130993	0.961696	0.937319	0.986707	0.00286726	36	Inverse variance weighted	0.25498	0.0257447025993301	1.29044	1.05879	1.57277	0.0115414	-0.0957426	-0.0390572	0.25498	-0.0099588	-0.0857838	-0.0604184	0.0405008133846448	0.104016446829896	0.631050640032624	-0.423018
13645_14_DHX38_PRP16	ITIH4_Q14624_OID30762_v1_Inflammation_II	43	Inverse variance weighted	-0.161842	0.0737425	0.850576	0.736109	0.982842	0.0281859	43	Inverse variance weighted	0.0664204	0.0222	1.06868	1.02317	1.1162	0.00277231	26	Inverse variance weighted	-0.252427	0.0307583725490549	0.776913	0.612027	0.986222	0.0380804	-0.161842	0.0664204	-0.252427	-0.0167663	-0.145076	-0.0770527	0.0435201318756416	0.103596679848297	0.476098663705671	-0.268905
9321_400_NMB_NMB	PECR_Q9BY49_OID30228_v1_Cardiometabolic_II	19	Inverse variance weighted	0.296853	0.114612	1.34562	1.07488	1.68454	0.00959588	17	Inverse variance weighted	0.100994	0.021013	1.10627	1.06163	1.15278	1.54e-06	24	Inverse variance weighted	0.304277	0.0376951826644422	1.35564	1.0638	1.72755	0.0138925	0.296853	0.100994	0.304277	0.0307299765304008	0.266122930469599	-0.0431526	0.104612534552708	0.103519203638456	-0.145367	0.35240528923878
8815_1_OLFML1_OLFL1	MME_P08473_OID21307_v1_Oncology	89	Inverse variance weighted	-0.142375	0.0482966	0.867296	0.788962	0.953406	0.00319901	84	Inverse variance weighted	0.029579	0.0132997	1.03002	1.00352	1.05722	0.0261463	9	Inverse variance weighted	-0.49815	0.10964835741877	0.607654	0.394725	0.935444	0.0236242	-0.142375	0.029579	-0.49815	-0.0147348	-0.127641	-0.229646	0.200175989849254	0.103492514912785	1.61295794442953	-1.40597
6600_70_RELL2_RELL2	PI16_Q6UXB8_OID30676_v1_Inflammation_II	76	Inverse variance weighted	-0.111142	0.055674	0.894812	0.802308	0.997981	0.0459018	76	Inverse variance weighted	0.0266279	0.0115967	1.02699	1.00391	1.0506	0.0216668	10	Inverse variance weighted	-0.431535	0.0849527690653389	0.649511	0.441586	0.955339	0.0283732	-0.111142	0.0266279	-0.431535	-0.0114909	-0.0996509	-0.177998	0.155016560235946	0.103389274125648	1.60154270799446	-1.39476
3327_27_NTN4_NET4	TSC1_Q92574_OID30478_v1_Inflammation_II	7	Inverse variance weighted	-0.535904	0.247104	0.58514	0.360513	0.949728	0.0301026	8	Inverse variance weighted	0.27322	0.0670015	1.31419	1.15246	1.49862	4.55e-05	29	Inverse variance weighted	-0.201931	0.0247787538105175	0.817151	0.694877	0.960941	0.0146152	-0.535904	0.27322	-0.201931	-0.0551717	-0.480732	-0.103738	-0.00660538	0.102950756276935	0.193575845419263	0.0123256671346077
11358_15_GRB10_GRB10	FST_P19883_OID20770_v1_Inflammation	20	Inverse variance weighted	-0.317046	0.135903	0.728297	0.557989	0.950586	0.019654	19	Inverse variance weighted	0.0666458	0.030032	1.06892	1.00781	1.13372	0.026476	7	Inverse variance weighted	-0.48913	0.106864918840041	0.61316	0.399607	0.940837	0.0251441	-0.317046	0.0666458	-0.48913	-0.0325984	-0.284448	-0.242054	0.176856799931891	0.102819265925569	0.763465402957044	-0.557827
9092_33_ANGPTL1_ANGL1	ADAM23_O75077_OID20651_v1_Inflammation	108	Inverse variance weighted	-0.0661019	0.0288822	0.936035	0.884519	0.990552	0.0220985	104	Inverse variance weighted	0.0229745	0.00725119	1.02324	1.0088	1.03789	0.00153291	27	Inverse variance weighted	-0.294243	0.0367356082080017	0.745095	0.583365	0.951663	0.0184313	-0.0661019	0.0229745	-0.294243	-0.00676009	-0.0593418	-0.0787619	0.0652416988918564	0.102267722129039	1.19152182746617	-0.986986
5491_12_SPOCK2_Testican_2	ICAM3_P32942_OID20277_v1_Cardiometabolic	168	Inverse variance weighted	0.171889	0.0444226	1.18755	1.08852	1.29558	0.000109099	181	Inverse variance weighted	0.0846547	0.0148451	1.08834	1.05713	1.12047	1.18e-08	47	Inverse variance weighted	0.205713	0.0193712253176119	1.2284	1.02177	1.47682	0.0285836	0.171889	0.0846547	0.205713	0.0174145590669688	0.154474667933031	-0.020553	0.0553821606894881	0.10131268474998	-0.119571	0.322196810446347
9369_174_LRRC4C_NGL1	KDM3A_Q9Y4C1_OID30426_v1_Inflammation_II	15	Inverse variance weighted	-0.482031	0.205717	0.617528	0.412617	0.9242	0.0191202	18	Inverse variance weighted	0.162013	0.0596583	1.17588	1.04611	1.32173	0.00661404	20	Inverse variance weighted	-0.300066	0.039212595946444	0.740769	0.577934	0.949484	0.017822	-0.482031	0.162013	-0.300066	-0.0486145	-0.433416	-0.125471	0.0282421657753062	0.100853555960849	0.260297070495937	-0.05859
5005_4_MAPK12_MK12	ITIH4_Q14624_OID30762_v1_Inflammation_II	43	Inverse variance weighted	-0.161842	0.0737425	0.850576	0.736109	0.982842	0.0281859	43	Inverse variance weighted	0.0632331	0.018174	1.06528	1.028	1.10391	0.000502693	23	Inverse variance weighted	-0.257155	0.0294736053891165	0.773248	0.617777	0.967846	0.0247444	-0.161842	0.0632331	-0.257155	-0.0162607	-0.145581	-0.074029	0.041507556144162	0.100472840730048	0.457415538571603	-0.25647
11465_4_GPR135_GP135	CASP4_P49662_OID31276_v1_Oncology_II	7	Inverse variance weighted	-0.496491	0.205301	0.608663	0.407025	0.91019	0.0155906	7	Inverse variance weighted	0.13309	0.0438766	1.14235	1.04822	1.24494	0.00241919	14	Inverse variance weighted	-0.374775	0.067327276572016	0.687444	0.484055	0.976293	0.0362546	-0.496491	0.13309	-0.374775	-0.0498787	-0.446612	-0.18184	0.0820828016520911	0.100462430491264	0.366250827729962	-0.165326
6626_81_CHST12_CHSTC	TSC1_Q92574_OID30478_v1_Inflammation_II	7	Inverse variance weighted	-0.535904	0.247104	0.58514	0.360513	0.949728	0.0301026	8	Inverse variance weighted	0.257272	0.0638785	1.2934	1.14119	1.46591	5.64e-05	29	Inverse variance weighted	-0.209261	0.0248704680650914	0.811184	0.681062	0.966166	0.0189839	-0.535904	0.257272	-0.209261	-0.053837	-0.482067	-0.102583	-0.00509087	0.100460104162451	0.191420626335832	0.00949958198907046
14254_27_PTPN4_PTN4	C1RL_Q9NZP8_OID30721_v1_Inflammation_II	56	Inverse variance weighted	-0.112481	0.057157	0.893614	0.798908	0.999547	0.0490756	51	Inverse variance weighted	0.0891094	0.0437994	1.0932	1.00327	1.19119	0.0419021	53	Inverse variance weighted	-0.126746	0.007999601885175	0.880957	0.790785	0.981412	0.021416	-0.112481	0.0891094	-0.126746	-0.0112943	-0.101187	-0.0269735	0.0043849311730498	0.100410406355203	0.239804474237385	-0.0389837
13645_14_DHX38_PRP16	LTB_Q06643_OID31383_v1_Oncology_II	65	Inverse variance weighted	0.203691	0.0727948	1.22592	1.06291	1.41392	0.00513951	77	Inverse variance weighted	-0.0806241	0.0222455	0.92254	0.883181	0.963654	0.000289749	26	Inverse variance weighted	-0.252427	0.0307753140897991	0.776913	0.612027	0.986222	0.0380804	0.203691	-0.0806241	-0.252427	0.0203516684094244	0.183339748590576	-0.0399679	0.0806712840254306	0.0999142168539405	-0.196218	0.396046555193981
12781_2_TARBP2_TRBP2	TCN2_P20062_OID20341_v1_Cardiometabolic	127	Inverse variance weighted	0.158633	0.0418706	1.17191	1.07957	1.27214	0.000151476	124	Inverse variance weighted	-0.0150756	0.00675944	0.985037	0.972073	0.998175	0.0257276	3	Inverse variance weighted	-1.04794	0.551796873463616	0.35066	0.124932	0.984237	0.0465717	0.158633	-0.0150756	-1.04794	0.0157982602644191	0.142834354735581	-1.06572	1.09732013225311	0.0995902404081222	-6.71819	6.9173677320588
9959_60_TMEM59L_TM59L	PI16_Q6UXB8_OID30676_v1_Inflammation_II	76	Inverse variance weighted	-0.111142	0.055674	0.894812	0.802308	0.997981	0.0459018	76	Inverse variance weighted	0.0364012	0.0114545	1.03707	1.01405	1.06062	0.00148356	17	Inverse variance weighted	-0.302982	0.0457394484388895	0.738612	0.549438	0.992921	0.0447429	-0.111142	0.0364012	-0.302982	-0.0110289	-0.100113	-0.100678	0.0786204219252039	0.0992326900728162	0.905853975004493	-0.707389
17231_1_LCP1_L_plastin	IL15_P40933_OID20562_v1_Inflammation	87	Inverse variance weighted	-0.176418	0.067878	0.838268	0.733844	0.95755	0.00934837	87	Inverse variance weighted	-0.0637723	0.020011	0.938219	0.902133	0.975748	0.00143824	19	Inverse variance weighted	0.274412	0.0276126252216713	1.31576	1.08047	1.60228	0.00633356	-0.176418	-0.0637723	0.274412	-0.0174999	-0.158918	-0.0716206	0.0366208877751817	0.0991954180554839	0.40597105437022	-0.20758
7765_15_ITM2A_ITM2A	ADAM23_O75077_OID20651_v1_Inflammation	108	Inverse variance weighted	-0.0661019	0.0288822	0.936035	0.884519	0.990552	0.0220985	104	Inverse variance weighted	0.0165362	0.00769302	1.01667	1.00146	1.03212	0.0315945	19	Inverse variance weighted	-0.396445	0.0650178983646429	0.672707	0.487781	0.927742	0.0156352	-0.0661019	0.0165362	-0.396445	-0.00655569	-0.0595462	-0.133991	0.120879391274103	0.0991754721178363	2.02703283364789	-1.82868
5337_64_CD86_B7_2	DDR1_Q08345_OID21009_v1_Neurology	115	Inverse variance weighted	0.179072	0.0459826	1.19611	1.09302	1.30891	9.85e-05	140	Inverse variance weighted	0.0315405	0.0121305	1.03204	1.00779	1.05687	0.00931986	10	Inverse variance weighted	0.562248	0.126980734929133	1.75461	1.12704	2.73164	0.0127907	0.179072	0.0315405	0.562248	0.0177335979079416	0.161338758092058	-0.231149	0.266615838369043	0.0990303489832995	-1.29081	1.48887212032349
13111_79_BCL6_BCL6	PI16_Q6UXB8_OID30676_v1_Inflammation_II	76	Inverse variance weighted	-0.111142	0.055674	0.894812	0.802308	0.997981	0.0459018	76	Inverse variance weighted	0.036215	0.0114982	1.03688	1.01377	1.06051	0.00163475	23	Inverse variance weighted	-0.303377	0.0422382278733326	0.73832	0.562003	0.969954	0.0293226	-0.111142	0.036215	-0.303377	-0.0109868	-0.100155	-0.0937737	0.0718001214887193	0.0988539677324257	0.843730760156897	-0.646023
7765_15_ITM2A_ITM2A	LTB_Q06643_OID31383_v1_Oncology_II	65	Inverse variance weighted	0.203691	0.0727948	1.22592	1.06291	1.41392	0.00513951	77	Inverse variance weighted	-0.0501435	0.0222122	0.951093	0.910575	0.993414	0.0239783	19	Inverse variance weighted	-0.396445	0.065027313217276	0.672707	0.487781	0.927742	0.0156352	0.203691	-0.0501435	-0.396445	0.019879140666138	0.183812276333862	-0.107574	0.147332674571999	0.0975943952814565	-0.528124	0.723313121102196
7939_1_PQLC2L_CC055	LY75_O60449_OID20580_v1_Inflammation	173	Inverse variance weighted	0.115247	0.0206121	1.12215	1.07772	1.16841	2.25e-08	173	Inverse variance weighted	-0.0108951	0.00488953	0.989164	0.97973	0.998689	0.025864	4	Inverse variance weighted	-1.03055	0.381047304236145	0.356811	0.172862	0.736506	0.00531749	0.115247	-0.0108951	-1.03055	0.011227928345782	0.104019084654218	-0.735625	0.758080644648625	0.0974248967804656	-6.38303	6.5778767268235
8363_18_KIAA1324L_K132L	PI16_Q6UXB8_OID30676_v1_Inflammation_II	76	Inverse variance weighted	-0.111142	0.055674	0.894812	0.802308	0.997981	0.0459018	76	Inverse variance weighted	0.0262425	0.0117631	1.02659	1.00319	1.05053	0.025687	14	Inverse variance weighted	-0.409961	0.0697639632790119	0.663676	0.475449	0.926422	0.0159914	-0.111142	0.0262425	-0.409961	-0.0107584	-0.100383	-0.147496	0.125978985518838	0.0967987311559587	1.32709554545242	-1.1335
9060_27_IGSF9B_TUTLB	RTN4R_Q9BZR6_OID21424_v1_Oncology	65	Inverse variance weighted	0.166198	0.0544379	1.18081	1.06131	1.31376	0.00226572	63	Inverse variance weighted	-0.0287976	0.0121922	0.971613	0.94867	0.995111	0.0181778	6	Inverse variance weighted	-0.556939	0.143020588530808	0.57296	0.346365	0.947795	0.0300986	0.166198	-0.0287976	-0.556939	0.0160384886021629	0.150159835397837	-0.264282	0.296358842122546	0.0965021079404083	-1.59016	1.78316384299126
5337_64_CD86_B7_2	NME3_Q13232_OID20789_v1_Inflammation	57	Inverse variance weighted	-0.230789	0.0760443	0.793907	0.683974	0.92151	0.00240594	55	Inverse variance weighted	-0.0395689	0.0154029	0.961204	0.932619	0.990665	0.0102016	10	Inverse variance weighted	0.562248	0.126981621190672	1.75461	1.12704	2.73164	0.0127907	-0.230789	-0.0395689	0.562248	-0.0222475	-0.208541	-0.271132	0.226636436031121	0.0963978194275314	1.17480339165227	-0.982008
13942_140_SPSB1_SPSB1	PSG1_P11464_OID20916_v1_Neurology	155	Inverse variance weighted	0.0677669	0.0228798	1.07012	1.02319	1.1192	0.00305781	152	Inverse variance weighted	-0.0100351	0.00470925	0.990015	0.980919	0.999195	0.0330951	6	Inverse variance weighted	-0.646916	0.157256823851132	0.523658	0.325183	0.843272	0.00778504	0.0677669	-0.0100351	-0.646916	0.00649184943470145	0.0612750765652986	-0.301732	0.314715224182921	0.0957967229427147	-4.45249	4.64408292893381
11441_11_PYGL_PYGL	ADAM23_O75077_OID20651_v1_Inflammation	108	Inverse variance weighted	-0.0661019	0.0288822	0.936035	0.884519	0.990552	0.0220985	104	Inverse variance weighted	0.0145735	0.00578629	1.01468	1.00324	1.02625	0.0117811	26	Inverse variance weighted	-0.433585	0.0777609618947554	0.648181	0.456074	0.921207	0.0156227	-0.0661019	0.0145735	-0.433585	-0.00631887	-0.0597831	-0.15873	0.146092617428134	0.095592798260863	2.4012970212381	-2.21011
15585_304_FBLN5_fibulin_5	ALDH5A1_P51649_OID31047_v1_Neurology_II	11	Inverse variance weighted	0.446237	0.160841	1.56242	1.13995	2.14146	0.0055305	13	Inverse variance weighted	-0.0938242	0.0430331	0.910443	0.836801	0.990565	0.0292366	14	Inverse variance weighted	-0.452193	0.0789670981887528	0.636231	0.452023	0.895509	0.00951967	0.446237	-0.0938242	-0.452193	0.0424266513431545	0.403810481656846	-0.112349	0.19720216379311	0.0950764698982469	-0.251769	0.441922352959161
16773_29_SCUBE3_SCUB3	DPP6_P42658_OID21354_v1_Oncology	45	Inverse variance weighted	-0.213294	0.0793609	0.807918	0.691535	0.943889	0.00719566	46	Inverse variance weighted	0.0742835	0.0225691	1.07711	1.0305	1.12583	0.000996951	22	Inverse variance weighted	-0.272963	0.0371504341727434	0.761121	0.58307	0.993544	0.0446815	-0.213294	0.0742835	-0.272963	-0.0202766	-0.193018	-0.0930915	0.0525382090847878	0.0950641232304708	0.436446093809933	-0.246318
8253_2_POMGNT1_PMGT1	LY75_O60449_OID20580_v1_Inflammation	173	Inverse variance weighted	0.115247	0.0206121	1.12215	1.07772	1.16841	2.25e-08	173	Inverse variance weighted	-0.0173283	0.00482914	0.982821	0.973562	0.992168	0.000332862	4	Inverse variance weighted	-0.628674	0.195324515186228	0.533299	0.29007	0.980477	0.043026	0.115247	-0.0173283	-0.628674	0.0108938607771617	0.104353152222838	-0.371942	0.393729910542169	0.0945261876519237	-3.22735	3.41640013300968
19553_14_STX1A_STX1a	PDIA5_Q14554_OID31209_v1_Oncology_II	81	Inverse variance weighted	-0.132765	0.0559546	0.875671	0.784714	0.977171	0.0176574	96	Inverse variance weighted	0.0546668	0.013218	1.05619	1.02918	1.08391	3.54e-05	40	Inverse variance weighted	-0.22952	0.0225323730388483	0.794915	0.655841	0.963481	0.0193275	-0.132765	0.0546668	-0.22952	-0.0125471	-0.120218	-0.0567106	0.0316163071144157	0.0945064715606611	0.427150452280769	-0.238138
11465_4_GPR135_GP135	PI16_Q6UXB8_OID30676_v1_Inflammation_II	76	Inverse variance weighted	-0.111142	0.055674	0.894812	0.802308	0.997981	0.0459018	76	Inverse variance weighted	0.0278697	0.0113921	1.02826	1.00556	1.05148	0.0144287	14	Inverse variance weighted	-0.374775	0.0670743084896773	0.687444	0.484055	0.976293	0.0362546	-0.111142	0.0278697	-0.374775	-0.0104448	-0.100697	-0.14191	0.12102079807989	0.0939776860843789	1.27684207877885	-1.08889
17231_1_LCP1_L_plastin	FAS_P25445_OID20316_v1_Cardiometabolic	38	Inverse variance weighted	0.166862	0.0810422	1.18159	1.00805	1.38501	0.0394993	43	Inverse variance weighted	0.0569448	0.0249613	1.0586	1.00805	1.11168	0.022529	19	Inverse variance weighted	0.274412	0.0276197201517874	1.31576	1.08047	1.60228	0.00633356	0.166862	0.0569448	0.274412	0.0156263211663631	0.151235295833637	-0.0385083	0.0697609726638663	0.0936483862934342	-0.23078	0.418076810701567
11441_11_PYGL_PYGL	SLMAP_Q14BN4_OID31441_v1_Oncology_II	4	Inverse variance weighted	-1.26651	0.364859	0.281812	0.137843	0.576148	0.00051806	4	Inverse variance weighted	0.27317	0.0814563	1.31412	1.12021	1.54161	0.000797741	26	Inverse variance weighted	-0.433585	0.0808819289941774	0.648181	0.456074	0.921207	0.0156227	-1.26651	0.27317	-0.433585	-0.118442	-1.14807	-0.276971	0.0400861708899513	0.0935183725644252	0.218687515033903	-0.0316508
7898_29_MDM1_MDM1	PSG1_P11464_OID20916_v1_Neurology	155	Inverse variance weighted	0.0677669	0.0228798	1.07012	1.02319	1.1192	0.00305781	152	Inverse variance weighted	-0.0113441	0.00458242	0.98872	0.97988	0.99764	0.0133026	9	Inverse variance weighted	-0.557099	0.131285452072814	0.572869	0.360959	0.909185	0.0180787	0.0677669	-0.0113441	-0.557099	0.00631976634094043	0.0614471596590596	-0.251	0.263639252403656	0.093257385482417	-3.70387	3.89038234379491
9294_45_MFAP2_MFAP2	PVR_P15151_OID21011_v1_Neurology	81	Inverse variance weighted	-0.0773995	0.0382099	0.92552	0.858738	0.997495	0.0428016	83	Inverse variance weighted	-0.0275469	0.00985767	0.972829	0.954213	0.991808	0.0051986	29	Inverse variance weighted	0.261103	0.0270544773729018	1.29836	1.05974	1.59071	0.0117343	-0.0773995	-0.0275469	0.261103	-0.00719257	-0.0702069	-0.0602194	0.0458342008959824	0.092927903514347	0.778032648237655	-0.592177
2516_57_CCL21_6Ckine	BTN2A1_Q7KYR7_OID20713_v1_Inflammation	133	Inverse variance weighted	-0.145131	0.0390027	0.864909	0.801255	0.93362	0.000198394	143	Inverse variance weighted	0.101982	0.012156	1.10736	1.08129	1.13406	4.88e-17	107	Inverse variance weighted	-0.130167	0.00586001206933665	0.877948	0.805407	0.957024	0.00309297	-0.145131	0.101982	-0.130167	-0.0132748	-0.131856	-0.0247604	-0.00178915	0.0914674173350025	0.170607049265638	0.0123277854043666
13056_18_SLC6A16_S6A16	LY75_O60449_OID20580_v1_Inflammation	173	Inverse variance weighted	0.115247	0.0206121	1.12215	1.07772	1.16841	2.25e-08	173	Inverse variance weighted	-0.0139325	0.00505785	0.986164	0.976436	0.995989	0.00587581	9	Inverse variance weighted	-0.756233	0.244692012322688	0.469432	0.24897	0.885112	0.0194301	0.115247	-0.0139325	-0.756233	0.0105362343818678	0.104710778618132	-0.46906	0.490132578534336	0.0914230582433216	-4.07004	4.25288747860507
15666_21_BMP2_BMP_2	OGN_P20774_OID21123_v1_Neurology	87	Inverse variance weighted	-0.147658	0.0452421	0.862726	0.789518	0.942722	0.00109951	82	Inverse variance weighted	0.0181551	0.0090335	1.01832	1.00045	1.03651	0.0444576	4	Inverse variance weighted	-0.739879	0.272900816188251	0.477172	0.231583	0.9832	0.0448632	-0.147658	0.0181551	-0.739879	-0.0134326	-0.134226	-0.548318	0.521453031992131	0.0909705300572385	3.7134221328041	-3.53148
14135_3_RXFP1_RXFP1	MME_P08473_OID21307_v1_Oncology	89	Inverse variance weighted	-0.142375	0.0482966	0.867296	0.788962	0.953406	0.00319901	84	Inverse variance weighted	0.0263069	0.0131821	1.02666	1.00047	1.05353	0.0459714	9	Inverse variance weighted	-0.489462	0.0999260772997312	0.612956	0.410819	0.914552	0.0165065	-0.142375	0.0263069	-0.489462	-0.0128763	-0.129499	-0.208731	0.182978855147917	0.0904387568991991	1.46606318704996	-1.28519
6986_17_HS3ST3B1_HS3SB	LTB_Q06643_OID31383_v1_Oncology_II	65	Inverse variance weighted	0.203691	0.0727948	1.22592	1.06291	1.41392	0.00513951	77	Inverse variance weighted	-0.0552963	0.0233106	0.946205	0.903947	0.990439	0.0176849	24	Inverse variance weighted	-0.332991	0.04894144751793	0.716777	0.537427	0.95598	0.0234265	0.203691	-0.0552963	-0.332991	0.0184131323621206	0.185278284637879	-0.0775121	0.114338369497263	0.0903971931331822	-0.380537	0.561331307824636
12716_3_ZNF175_ZN175	LTB_Q06643_OID31383_v1_Oncology_II	65	Inverse variance weighted	0.203691	0.0727948	1.22592	1.06291	1.41392	0.00513951	77	Inverse variance weighted	-0.057821	0.0204561	0.943819	0.906726	0.982429	0.00470463	20	Inverse variance weighted	-0.317788	0.0432743203874386	0.727757	0.557335	0.95029	0.0195657	0.203691	-0.057821	-0.317788	0.0183748227866847	0.185316594213315	-0.0664428	0.103192490746064	0.090209116600552	-0.326194	0.506611875286156
6600_70_RELL2_RELL2	CASP4_P49662_OID31276_v1_Oncology_II	7	Inverse variance weighted	-0.496491	0.205301	0.608663	0.407025	0.91019	0.0155906	7	Inverse variance weighted	0.102897	0.0415231	1.10838	1.02174	1.20236	0.0132098	10	Inverse variance weighted	-0.431535	0.0850595833653333	0.649511	0.441586	0.955339	0.0283732	-0.496491	0.102897	-0.431535	-0.0444036	-0.452087	-0.21112	0.122313142987467	0.0894349928352854	0.425225351268707	-0.246355
12475_48_CLIC5_CLIC5	TSC1_Q92574_OID30478_v1_Inflammation_II	7	Inverse variance weighted	-0.535904	0.247104	0.58514	0.360513	0.949728	0.0301026	8	Inverse variance weighted	0.346465	0.0522761	1.41406	1.27635	1.56663	3.41e-11	60	Inverse variance weighted	-0.137838	0.0204228712560439	0.87124	0.761834	0.996358	0.0440834	-0.535904	0.346465	-0.137838	-0.0477561	-0.488148	-0.0877849	-0.00772723	0.0891130625577624	0.163807074301632	0.0144190508138928
5491_12_SPOCK2_Testican_2	BTN2A1_Q7KYR7_OID20713_v1_Inflammation	133	Inverse variance weighted	-0.145131	0.0390027	0.864909	0.801255	0.93362	0.000198394	143	Inverse variance weighted	-0.0628412	0.0157221	0.939093	0.910595	0.968482	6.42e-05	47	Inverse variance weighted	0.205713	0.0193556503297675	1.2284	1.02177	1.47682	0.0285836	-0.145131	-0.0628412	0.205713	-0.0129273	-0.132204	-0.0508643	0.0250098207609294	0.0890729267313322	0.35047154242553	-0.172326
4931_59_F3_TF	STAB2_Q8WWQ8_OID30401_v1_Cardiometabolic_II	120	Inverse variance weighted	-0.0957426	0.0483882	0.908698	0.826477	0.999099	0.047857	125	Inverse variance weighted	0.0244749	0.0106984	1.02478	1.00351	1.04649	0.0221545	13	Inverse variance weighted	-0.347664	0.0593343002650906	0.706336	0.505521	0.986923	0.0416369	-0.0957426	0.0244749	-0.347664	-0.00850906	-0.0872335	-0.124804	0.107786168135786	0.0888743520560129	1.30353996914005	-1.12579
17231_1_LCP1_L_plastin	PDIA5_Q14554_OID31209_v1_Oncology_II	81	Inverse variance weighted	-0.132765	0.0559546	0.875671	0.784714	0.977171	0.0176574	96	Inverse variance weighted	-0.0428688	0.0169528	0.958037	0.926727	0.990405	0.0114479	19	Inverse variance weighted	0.274412	0.02759269253425	1.31576	1.08047	1.60228	0.00633356	-0.132765	-0.0428688	0.274412	-0.0117637	-0.121001	-0.0658454	0.0423179811719048	0.0886054560484098	0.495954609533224	-0.318744
17231_1_LCP1_L_plastin	LIPF_P07098_OID30266_v1_Cardiometabolic_II	57	Inverse variance weighted	-0.146122	0.0619149	0.864052	0.765309	0.975535	0.0182726	61	Inverse variance weighted	-0.0471036	0.0147733	0.953989	0.926761	0.982016	0.00143044	19	Inverse variance weighted	0.274412	0.0275918967367764	1.31576	1.08047	1.60228	0.00633356	-0.146122	-0.0471036	0.274412	-0.0129258	-0.133196	-0.0670059	0.0411543299468363	0.0884587600672018	0.458560782040618	-0.281643
15666_21_BMP2_BMP_2	LY75_O60449_OID20580_v1_Inflammation	173	Inverse variance weighted	0.115247	0.0206121	1.12215	1.07772	1.16841	2.25e-08	173	Inverse variance weighted	-0.0137569	0.00541964	0.986337	0.975915	0.996871	0.0111382	4	Inverse variance weighted	-0.739879	0.272900777092529	0.477172	0.231583	0.9832	0.0448632	0.115247	-0.0137569	-0.739879	0.0101784121148167	0.105068600885183	-0.524707	0.545063935216174	0.0883182292526461	-4.55289	4.72952765566405
3327_27_NTN4_NET4	DPP6_P42658_OID21354_v1_Oncology	45	Inverse variance weighted	-0.213294	0.0793609	0.807918	0.691535	0.943889	0.00719566	46	Inverse variance weighted	0.0929568	0.026546	1.09741	1.04178	1.15602	0.000462247	29	Inverse variance weighted	-0.201931	0.0168807453026443	0.817151	0.694877	0.960941	0.0146152	-0.213294	0.0929568	-0.201931	-0.0187709	-0.194523	-0.0518571	0.0143153717038688	0.088004617474585	0.243124799098055	-0.0671156
14135_3_RXFP1_RXFP1	LTB_Q06643_OID31383_v1_Oncology_II	65	Inverse variance weighted	0.203691	0.0727948	1.22592	1.06291	1.41392	0.00513951	77	Inverse variance weighted	-0.0361676	0.0164487	0.964479	0.93388	0.996079	0.0278909	9	Inverse variance weighted	-0.489462	0.0999272464514334	0.612956	0.410819	0.914552	0.0165065	0.203691	-0.0361676	-0.489462	0.0177026683919023	0.185988748608098	-0.178155	0.213560071436712	0.0869092505350988	-0.874631	1.04844904405919
6626_81_CHST12_CHSTC	KDM3A_Q9Y4C1_OID30426_v1_Inflammation_II	15	Inverse variance weighted	-0.482031	0.205717	0.617528	0.412617	0.9242	0.0191202	18	Inverse variance weighted	0.200078	0.0412289	1.2215	1.12667	1.3243	1.22e-06	29	Inverse variance weighted	-0.209261	0.0204084380592515	0.811184	0.681062	0.966166	0.0189839	-0.482031	0.200078	-0.209261	-0.0418685	-0.440162	-0.0818691	-0.001868	0.0868586295998413	0.169841992771792	0.00387526642789102
9369_174_LRRC4C_NGL1	PSG1_P11464_OID20916_v1_Neurology	155	Inverse variance weighted	0.0677669	0.0228798	1.07012	1.02319	1.1192	0.00305781	152	Inverse variance weighted	-0.0195905	0.00529449	0.9806	0.970477	0.990829	0.000215453	20	Inverse variance weighted	-0.300066	0.0380028735016019	0.740769	0.577934	0.949484	0.017822	0.0677669	-0.0195905	-0.300066	0.00587845312557912	0.0618884728744209	-0.0686072	0.0803640851887188	0.0867451642351185	-1.0124	1.18588948816593
8815_1_OLFML1_OLFL1	CASP4_P49662_OID31276_v1_Oncology_II	7	Inverse variance weighted	-0.496491	0.205301	0.608663	0.407025	0.91019	0.0155906	7	Inverse variance weighted	0.0864063	0.0418025	1.09025	1.00448	1.18334	0.0387328	9	Inverse variance weighted	-0.49815	0.109707128605915	0.607654	0.394725	0.935444	0.0236242	-0.496491	0.0864063	-0.49815	-0.0430433	-0.453447	-0.258069	0.171982678330741	0.0866950689524573	0.519786727526175	-0.346397
13672_3_HSPA6_HSP76	LTB_Q06643_OID31383_v1_Oncology_II	65	Inverse variance weighted	0.203691	0.0727948	1.22592	1.06291	1.41392	0.00513951	77	Inverse variance weighted	-0.0650487	0.0226741	0.937022	0.896291	0.979603	0.00411968	27	Inverse variance weighted	-0.271159	0.035822837218293	0.762495	0.588678	0.987634	0.0399497	0.203691	-0.0650487	-0.271159	0.0176385551011863	0.186052861898814	-0.0525742	0.0878513160490407	0.0865944935774409	-0.258107	0.431296111259517
9369_174_LRRC4C_NGL1	TMPRSS5_Q9H3S3_OID20947_v1_Neurology	131	Inverse variance weighted	-0.109767	0.0340903	0.896043	0.838128	0.957959	0.00128243	126	Inverse variance weighted	0.0316748	0.00715559	1.03218	1.01781	1.04676	9.57e-06	20	Inverse variance weighted	-0.300066	0.0380034078347481	0.740769	0.577934	0.949484	0.017822	-0.109767	0.0316748	-0.300066	-0.00950452	-0.100262	-0.0839912	0.0649821576211074	0.0865882550445226	0.765178064119941	-0.592002
2833_20_KLK4_Kallikrein_4	RTN4R_Q9BZR6_OID21424_v1_Oncology	65	Inverse variance weighted	0.166198	0.0544379	1.18081	1.06131	1.31376	0.00226572	63	Inverse variance weighted	-0.0243393	0.0115227	0.975955	0.95416	0.998247	0.0346611	5	Inverse variance weighted	-0.587481	0.151091908289896	0.555725	0.335691	0.919985	0.0223556	0.166198	-0.0243393	-0.587481	0.0142988777889704	0.15189944621103	-0.281841	0.310439018037166	0.0860350299860448	-1.69581	1.86788296395315
13111_79_BCL6_BCL6	ADAM23_O75077_OID20651_v1_Inflammation	108	Inverse variance weighted	-0.0661019	0.0288822	0.936035	0.884519	0.990552	0.0220985	104	Inverse variance weighted	0.0187431	0.00741483	1.01892	1.00422	1.03384	0.0114784	23	Inverse variance weighted	-0.303377	0.0422364039061698	0.73832	0.562003	0.969954	0.0293226	-0.0661019	0.0187431	-0.303377	-0.00568623	-0.0604157	-0.0884696	0.077097117913784	0.0860222123384609	1.3383813971648	-1.16634
11358_15_GRB10_GRB10	MST1_P26927_OID30713_v1_Inflammation_II	186	Inverse variance weighted	-0.0619263	0.0216835	0.939952	0.900842	0.980761	0.00429115	186	Inverse variance weighted	0.0108742	0.0045625	1.01093	1.00193	1.02001	0.0171547	7	Inverse variance weighted	-0.48913	0.106846185293863	0.61316	0.399607	0.940837	0.0251441	-0.0619263	0.0108742	-0.48913	-0.00531888	-0.0566075	-0.214737	0.204099646915213	0.0858903603785552	3.46762581420681	-3.29585
5708_1_LEAP2_LEAP2	KDM3A_Q9Y4C1_OID30426_v1_Inflammation_II	15	Inverse variance weighted	-0.482031	0.205717	0.617528	0.412617	0.9242	0.0191202	18	Inverse variance weighted	0.170841	0.0390439	1.1863	1.09891	1.28065	1.21e-05	50	Inverse variance weighted	-0.241684	0.0195723563962362	0.785305	0.676442	0.911687	0.0015015	-0.482031	0.170841	-0.241684	-0.0412895	-0.440741	-0.0796513	-0.00292767	0.0856573639511871	0.165241110352762	0.00607361754961271
15447_45_SORD_Sorbitol_dehydrogenase	PI16_Q6UXB8_OID30676_v1_Inflammation_II	76	Inverse variance weighted	-0.111142	0.055674	0.894812	0.802308	0.997981	0.0459018	76	Inverse variance weighted	0.0432421	0.012122	1.04419	1.01967	1.0693	0.000360765	46	Inverse variance weighted	-0.219927	0.019270189233108	0.802577	0.675974	0.952892	0.0120419	-0.111142	0.0432421	-0.219927	-0.00951011	-0.101632	-0.0472797	0.0282594637465904	0.0855673522130029	0.425399714224396	-0.254265
9092_33_ANGPTL1_ANGL1	PI16_Q6UXB8_OID30676_v1_Inflammation_II	76	Inverse variance weighted	-0.111142	0.055674	0.894812	0.802308	0.997981	0.0459018	76	Inverse variance weighted	0.0321673	0.0115881	1.03269	1.0095	1.05641	0.00550509	27	Inverse variance weighted	-0.294243	0.0367371216312118	0.745095	0.583365	0.951663	0.0184313	-0.111142	0.0321673	-0.294243	-0.009465	-0.101677	-0.0814698	0.0625397569047706	0.0851615132823745	0.733025562068417	-0.562703
16773_29_SCUBE3_SCUB3	PKD1_P98161_OID30328_v1_Cardiometabolic_II	61	Inverse variance weighted	-0.161238	0.0676922	0.851089	0.74534	0.971843	0.0172221	55	Inverse variance weighted	0.0501066	0.0207128	1.05138	1.00955	1.09494	0.0155584	22	Inverse variance weighted	-0.272963	0.0371270952197523	0.761121	0.58307	0.993544	0.0446815	-0.161238	0.0501066	-0.272963	-0.0136772	-0.147561	-0.0864463	0.0590918723581306	0.0848262670501718	0.536140586088537	-0.366488
10024_44_HOGA1_HOGA1	CASP4_P49662_OID31276_v1_Oncology_II	7	Inverse variance weighted	-0.496491	0.205301	0.608663	0.407025	0.91019	0.0155906	7	Inverse variance weighted	0.105944	0.0413904	1.11176	1.02513	1.20571	0.0104787	10	Inverse variance weighted	-0.397527	0.0761914954501295	0.67198	0.461827	0.977763	0.0377531	-0.496491	0.105944	-0.397527	-0.0421154	-0.454375	-0.191451	0.10721994401233	0.0848261382669336	0.38560787918955	-0.215956
6600_70_RELL2_RELL2	CRELD2_Q6UXH1_OID20751_v1_Inflammation	73	Inverse variance weighted	-0.154382	0.0591511	0.856944	0.763136	0.962283	0.00905502	71	Inverse variance weighted	0.0302465	0.0110325	1.03071	1.00866	1.05324	0.00611452	10	Inverse variance weighted	-0.431535	0.0849528632185498	0.649511	0.441586	0.955339	0.0283732	-0.154382	0.0302465	-0.431535	-0.0130524	-0.14133	-0.17956	0.153455200009192	0.0845459389567654	1.1630854840611	-0.993994
16773_29_SCUBE3_SCUB3	ADAM23_O75077_OID20651_v1_Inflammation	108	Inverse variance weighted	-0.0661019	0.0288822	0.936035	0.884519	0.990552	0.0220985	104	Inverse variance weighted	0.0204517	0.00614725	1.02066	1.00844	1.03303	0.000877965	22	Inverse variance weighted	-0.272963	0.0371127994081776	0.761121	0.58307	0.993544	0.0446815	-0.0661019	0.0204517	-0.272963	-0.00558256	-0.0605194	-0.0783236	0.0671585300781987	0.0844537711463487	1.18489204038686	-1.01598
2997_8_JAM2_JAM_B	SLMAP_Q14BN4_OID31441_v1_Oncology_II	4	Inverse variance weighted	-1.26651	0.364859	0.281812	0.137843	0.576148	0.00051806	4	Inverse variance weighted	0.249769	0.106547	1.28373	1.04179	1.58186	0.0190674	11	Inverse variance weighted	-0.428011	0.090441270291569	0.651804	0.438746	0.968326	0.0340587	-1.26651	0.249769	-0.428011	-0.106904	-1.15961	-0.284169	0.0703610702876134	0.0844078672853028	0.224370605402749	-0.0555549
17231_1_LCP1_L_plastin	S100A11_P31949_OID20130_v1_Cardiometabolic	16	Inverse variance weighted	0.304764	0.114346	1.35631	1.08399	1.69704	0.00769246	16	Inverse variance weighted	0.0937063	0.0300477	1.09824	1.03543	1.16486	0.00181723	19	Inverse variance weighted	0.274412	0.0277264578741187	1.31576	1.08047	1.60228	0.00633356	0.304764	0.0937063	0.274412	0.0257140931764984	0.279050142823502	-0.0286298	0.080057950609771	0.0843737228291392	-0.0939407	0.262688141038212
19553_14_STX1A_STX1a	TSC1_Q92574_OID30478_v1_Inflammation_II	7	Inverse variance weighted	-0.535904	0.247104	0.58514	0.360513	0.949728	0.0301026	8	Inverse variance weighted	0.196983	0.0542149	1.21772	1.09496	1.35425	0.000279739	40	Inverse variance weighted	-0.22952	0.0249245991709194	0.794915	0.655841	0.963481	0.0193275	-0.535904	0.196983	-0.22952	-0.0452116	-0.490692	-0.0940638	0.0036406034069207	0.084365113790929	0.175523613486849	-0.00679339
15585_304_FBLN5_fibulin_5	CRELD2_Q6UXH1_OID20751_v1_Inflammation	73	Inverse variance weighted	-0.154382	0.0591511	0.856944	0.763136	0.962283	0.00905502	71	Inverse variance weighted	0.0287875	0.0140312	1.02921	1.00129	1.0579	0.0402014	14	Inverse variance weighted	-0.452193	0.078864846307687	0.636231	0.452023	0.895509	0.00951967	-0.154382	0.0287875	-0.452193	-0.0130175	-0.141365	-0.167593	0.141557580525595	0.0843199180945357	1.08556757754768	-0.916928
7765_15_ITM2A_ITM2A	MME_P08473_OID21307_v1_Oncology	89	Inverse variance weighted	-0.142375	0.0482966	0.867296	0.788962	0.953406	0.00319901	84	Inverse variance weighted	0.0302349	0.013168	1.0307	1.00444	1.05764	0.021671	19	Inverse variance weighted	-0.396445	0.06501899287689	0.672707	0.487781	0.927742	0.0156352	-0.142375	0.0302349	-0.396445	-0.0119865	-0.130389	-0.139424	0.115450746049381	0.0841892487661574	0.979268065449467	-0.81089
15305_7_SCGN_Secretagogin	DDR1_Q08345_OID21009_v1_Neurology	115	Inverse variance weighted	0.179072	0.0459826	1.19611	1.09302	1.30891	9.85e-05	140	Inverse variance weighted	-0.0404124	0.016928	0.960393	0.929051	0.992793	0.0169723	12	Inverse variance weighted	-0.372615	0.0672555212681124	0.688931	0.483662	0.981316	0.0389704	0.179072	-0.0404124	-0.372615	0.0150582626888602	0.16401409331114	-0.116763	0.14687908437436	0.0840903812582896	-0.652041	0.820221991016639
6600_70_RELL2_RELL2	LTB_Q06643_OID31383_v1_Oncology_II	65	Inverse variance weighted	0.203691	0.0727948	1.22592	1.06291	1.41392	0.00513951	77	Inverse variance weighted	-0.0394582	0.0178997	0.96131	0.928169	0.995635	0.0274963	10	Inverse variance weighted	-0.431535	0.0849551438395018	0.649511	0.441586	0.955339	0.0283732	0.203691	-0.0394582	-0.431535	0.0170275936449084	0.186663823355092	-0.149484	0.183539675570332	0.0835950473303861	-0.733877	0.901067302066694
9092_33_ANGPTL1_ANGL1	LTB_Q06643_OID31383_v1_Oncology_II	65	Inverse variance weighted	0.203691	0.0727948	1.22592	1.06291	1.41392	0.00513951	77	Inverse variance weighted	-0.057824	0.0190438	0.943816	0.909237	0.97971	0.00239443	27	Inverse variance weighted	-0.294243	0.03675173157671	0.745095	0.583365	0.951663	0.0184313	0.203691	-0.057824	-0.294243	0.0170143221974107	0.186677094802589	-0.0550191	0.0890477160877624	0.08352989265822	-0.27011	0.43716970208795
17231_1_LCP1_L_plastin	TYRO3_Q06418_OID20161_v1_Cardiometabolic	154	Inverse variance weighted	0.091315	0.0317043	1.09561	1.0296	1.16586	0.00397413	146	Inverse variance weighted	0.0277095	0.00691689	1.0281	1.01425	1.04213	6.17e-05	19	Inverse variance weighted	0.274412	0.027583786151406	1.31576	1.08047	1.60228	0.00633356	0.091315	0.0277095	0.274412	0.00760381457205994	0.0837111604279401	-0.0464604	0.0616680354288156	0.083270181830088	-0.508793	0.675333212639171
15305_7_SCGN_Secretagogin	FST_P19883_OID20770_v1_Inflammation	20	Inverse variance weighted	-0.317046	0.135903	0.728297	0.557989	0.950586	0.019654	19	Inverse variance weighted	0.0707584	0.0315992	1.07332	1.00886	1.1419	0.0251398	12	Inverse variance weighted	-0.372615	0.0672891999277471	0.688931	0.483662	0.981316	0.0389704	-0.317046	0.0707584	-0.372615	-0.0263656	-0.29068	-0.158252	0.105521206879171	0.0831602408986839	0.499146613964156	-0.332826
19277_4_TSTD1_KAT	PDIA5_Q14554_OID31209_v1_Oncology_II	81	Inverse variance weighted	-0.132765	0.0559546	0.875671	0.784714	0.977171	0.0176574	96	Inverse variance weighted	-0.0625867	0.0129681	0.939332	0.915757	0.963513	1.39e-06	27	Inverse variance weighted	0.176346	0.012989202870432	1.19285	1.03279	1.37772	0.0164478	-0.132765	-0.0625867	0.176346	-0.0110369	-0.121728	-0.0364958	0.014421916680278	0.0831313047821668	0.274890075230004	-0.108627
12475_48_CLIC5_CLIC5	KDM3A_Q9Y4C1_OID30426_v1_Inflammation_II	15	Inverse variance weighted	-0.482031	0.205717	0.617528	0.412617	0.9242	0.0191202	18	Inverse variance weighted	0.290268	0.0583243	1.33679	1.19238	1.49868	6.46e-07	60	Inverse variance weighted	-0.137838	0.0193821985766251	0.87124	0.761834	0.996358	0.0440834	-0.482031	0.290268	-0.137838	-0.04001	-0.442021	-0.0779991	-0.00202085	0.0830029081342461	0.161813448112136	0.00419236815635601
17857_6_ACADL_ACADL	ENTPD6_O75354_OID20100_v1_Cardiometabolic	105	Inverse variance weighted	-0.148172	0.0388169	0.862283	0.799113	0.930447	0.000134981	111	Inverse variance weighted	0.0168593	0.00762294	1.017	1.00192	1.03231	0.026991	8	Inverse variance weighted	-0.72782	0.179554761521889	0.482961	0.297793	0.783265	0.00317572	-0.148172	0.0168593	-0.72782	-0.0122705	-0.135901	-0.364198	0.339656829836216	0.0828127747751184	2.45794601357146	-2.29232
15585_304_FBLN5_fibulin_5	PCDHB15_Q9Y5E8_OID31377_v1_Oncology_II	85	Inverse variance weighted	-0.138503	0.041758	0.87066	0.802239	0.944917	0.00091051	84	Inverse variance weighted	0.0252295	0.0101638	1.02555	1.00532	1.04619	0.0130545	14	Inverse variance weighted	-0.452193	0.0788642287950035	0.636231	0.452023	0.895509	0.00951967	-0.138503	0.0252295	-0.452193	-0.0114086	-0.127095	-0.165982	0.14316529630203	0.0823705009591874	1.19840028569401	-1.03366
5005_4_MAPK12_MK12	TSC1_Q92574_OID30478_v1_Inflammation_II	7	Inverse variance weighted	-0.535904	0.247104	0.58514	0.360513	0.949728	0.0301026	8	Inverse variance weighted	0.17157	0.0525361	1.18717	1.07101	1.31593	0.0010917	23	Inverse variance weighted	-0.257155	0.0307996462724241	0.773248	0.617777	0.967846	0.0247444	-0.535904	0.17157	-0.257155	-0.0441202	-0.491784	-0.104488	0.0162471111939065	0.0823285265474645	0.194974251604301	-0.0303172
8932_1_ENTPD6_ENTP6	OGN_P20774_OID21123_v1_Neurology	87	Inverse variance weighted	-0.147658	0.0452421	0.862726	0.789518	0.942722	0.00109951	82	Inverse variance weighted	0.0205783	0.00922706	1.02079	1.0025	1.03942	0.0257336	18	Inverse variance weighted	-0.590265	0.1298516558607	0.554181	0.360075	0.852922	0.00729302	-0.147658	0.0205783	-0.590265	-0.0121466	-0.135512	-0.266656	0.242362623593018	0.0822616087814078	1.80589639105135	-1.64137
8099_42_SPON2_SPON2	BTN2A1_Q7KYR7_OID20713_v1_Inflammation	133	Inverse variance weighted	-0.145131	0.0390027	0.864909	0.801255	0.93362	0.000198394	143	Inverse variance weighted	0.0549345	0.0089693	1.05647	1.03806	1.07521	9.08e-10	36	Inverse variance weighted	-0.214675	0.0162424554848571	0.806804	0.695655	0.935712	0.00453073	-0.145131	0.0549345	-0.214675	-0.011793	-0.133338	-0.0436282	0.0200421851016022	0.0812577440658107	0.300612573631347	-0.138097
6626_81_CHST12_CHSTC	MILR1_Q7Z6M3_OID20482_v1_Inflammation	114	Inverse variance weighted	0.0790417	0.0362447	1.08225	1.00803	1.16193	0.0291998	111	Inverse variance weighted	-0.0305409	0.00992398	0.969921	0.951237	0.988971	0.00208757	29	Inverse variance weighted	-0.209261	0.0186694938845024	0.811184	0.681062	0.966166	0.0189839	0.0790417	-0.0305409	-0.209261	0.0063910042069374	0.0726506997930626	-0.0302012	0.042983212220562	0.0808561035948491	-0.382092	0.543804220371591
9343_16_IL2RB_IL_2_sRb	CTBS_Q01459_OID30710_v1_Inflammation_II	101	Inverse variance weighted	0.101137	0.0392149	1.10643	1.02457	1.19482	0.00990743	97	Inverse variance weighted	0.0320484	0.00888344	1.03257	1.01474	1.0507	0.000308976	36	Inverse variance weighted	0.25498	0.0257411928388615	1.29044	1.05879	1.57277	0.0115414	0.101137	0.0320484	0.25498	0.0081717036222918	0.0929651613777082	-0.042281	0.0586244415864603	0.0807984667340815	-0.418058	0.579654526432675
9343_16_IL2RB_IL_2_sRb	MSR1_P21757_OID21063_v1_Neurology	90	Inverse variance weighted	0.134499	0.0622835	1.14396	1.0125	1.2925	0.0308138	96	Inverse variance weighted	0.042587	0.0184962	1.04351	1.00635	1.08203	0.0213082	36	Inverse variance weighted	0.25498	0.025751668305717	1.29044	1.05879	1.57277	0.0115414	0.134499	0.042587	0.25498	0.0108588399364039	0.123640389063596	-0.0396144	0.0613321098156091	0.0807353322181786	-0.294533	0.45600343044055
9343_16_IL2RB_IL_2_sRb	ICAM3_P32942_OID20277_v1_Cardiometabolic	168	Inverse variance weighted	0.171889	0.0444226	1.18755	1.08852	1.29558	0.000109099	181	Inverse variance weighted	0.0543956	0.0252994	1.0559	1.00482	1.10958	0.0315492	36	Inverse variance weighted	0.25498	0.0257763808507933	1.29044	1.05879	1.57277	0.0115414	0.171889	0.0543956	0.25498	0.0138697863788832	0.158019440621117	-0.0366519	0.0643914928464381	0.0806902597734247	-0.21323	0.374610404446336
15305_7_SCGN_Secretagogin	MATN3_O15232_OID20979_v1_Neurology	89	Inverse variance weighted	-0.0841588	0.0386753	0.919285	0.852176	0.99168	0.0295529	82	Inverse variance weighted	0.0182117	0.00776387	1.01838	1.003	1.03399	0.0189913	12	Inverse variance weighted	-0.372615	0.0672521905748048	0.688931	0.483662	0.981316	0.0389704	-0.0841588	0.0182117	-0.372615	-0.00678596	-0.0773728	-0.1386	0.125028332633024	0.0806328315634825	1.64688997543015	-1.48562
9294_45_MFAP2_MFAP2	ITGB2_P05107_OID20315_v1_Cardiometabolic	53	Inverse variance weighted	0.214538	0.0900278	1.23929	1.03882	1.47845	0.0171713	52	Inverse variance weighted	0.0662349	0.0226765	1.06848	1.02203	1.11704	0.00349072	29	Inverse variance weighted	0.261103	0.0270947770620932	1.29836	1.05974	1.59071	0.0117343	0.214538	0.0662349	0.261103	0.0172941269323981	0.197243883067602	-0.0358116	0.0703998899741008	0.0806110158866398	-0.166924	0.328146466792065
17231_1_LCP1_L_plastin	NCF2_P19878_OID20567_v1_Inflammation	15	Inverse variance weighted	0.294592	0.140652	1.34258	1.01909	1.76874	0.0362172	16	Inverse variance weighted	0.0863681	0.0342601	1.09021	1.0194	1.16593	0.0117038	19	Inverse variance weighted	0.274412	0.0277413787510675	1.31576	1.08047	1.60228	0.00633356	0.294592	0.0863681	0.274412	0.0237004097344207	0.270891555265579	-0.0306727	0.078073512086513	0.0804516502492548	-0.104119	0.265022544272424
11275_94_LRP1B_LRP1B	MILR1_Q7Z6M3_OID20482_v1_Inflammation	114	Inverse variance weighted	0.0790417	0.0362447	1.08225	1.00803	1.16193	0.0291998	111	Inverse variance weighted	-0.0277264	0.00896586	0.972654	0.955711	0.989898	0.00198514	21	Inverse variance weighted	-0.227723	0.0240392864401162	0.796345	0.647513	0.979386	0.0309804	0.0790417	-0.0277264	-0.227723	0.006313949234735	0.072727754765265	-0.0408031	0.0534309506573627	0.0798812388297575	-0.516222	0.675984296307209
13672_3_HSPA6_HSP76	ADAM23_O75077_OID20651_v1_Inflammation	108	Inverse variance weighted	-0.0661019	0.0288822	0.936035	0.884519	0.990552	0.0220985	104	Inverse variance weighted	0.0194247	0.00742853	1.01961	1.00488	1.03457	0.00892578	27	Inverse variance weighted	-0.271159	0.0357927519040147	0.762495	0.588678	0.987634	0.0399497	-0.0661019	0.0194247	-0.271159	-0.00526719	-0.0608347	-0.075421	0.0648865991546324	0.0796829238621921	1.14098022788422	-0.981614
8099_42_SPON2_SPON2	PDIA5_Q14554_OID31209_v1_Oncology_II	81	Inverse variance weighted	-0.132765	0.0559546	0.875671	0.784714	0.977171	0.0176574	96	Inverse variance weighted	0.0492756	0.0125575	1.05051	1.02497	1.07669	8.71e-05	36	Inverse variance weighted	-0.214675	0.0162467679317427	0.806804	0.695655	0.935712	0.00453073	-0.132765	0.0492756	-0.214675	-0.0105782	-0.122187	-0.0424219	0.0212654479643333	0.0796762974855009	0.319526292394289	-0.160174
8064_125_PVR_Poliovirus_receptor	LY75_O60449_OID20580_v1_Inflammation	173	Inverse variance weighted	0.115247	0.0206121	1.12215	1.07772	1.16841	2.25e-08	173	Inverse variance weighted	-0.0130029	0.00500378	0.987081	0.977448	0.99681	0.00936012	6	Inverse variance weighted	-0.706097	0.238766046814626	0.493567	0.254394	0.9576	0.0367865	0.115247	-0.0130029	-0.706097	0.00918130467718803	0.106065708322812	-0.4588	0.477162756433855	0.0796663135832252	-3.98102	4.14034814450119
11275_94_LRP1B_LRP1B	TSC1_Q92574_OID30478_v1_Inflammation_II	7	Inverse variance weighted	-0.535904	0.247104	0.58514	0.360513	0.949728	0.0301026	8	Inverse variance weighted	0.187353	0.0509363	1.20605	1.09146	1.33267	0.000234901	21	Inverse variance weighted	-0.227723	0.0258630151390339	0.796345	0.647513	0.979386	0.0309804	-0.535904	0.187353	-0.227723	-0.0426646	-0.49324	-0.0933561	0.0080269286020274	0.079612342046259	0.174202976845231	-0.0149783
2997_8_JAM2_JAM_B	LTB_Q06643_OID31383_v1_Oncology_II	65	Inverse variance weighted	0.203691	0.0727948	1.22592	1.06291	1.41392	0.00513951	77	Inverse variance weighted	-0.0378847	0.0181352	0.962824	0.929201	0.997663	0.0367068	11	Inverse variance weighted	-0.428011	0.0864400799727928	0.651804	0.438746	0.968326	0.0340587	0.203691	-0.0378847	-0.428011	0.0162150561111313	0.187476360888869	-0.153208	0.185637612857805	0.0796059861036331	-0.752155	0.911366888167925
6986_17_HS3ST3B1_HS3SB	BTN2A1_Q7KYR7_OID20713_v1_Inflammation	133	Inverse variance weighted	-0.145131	0.0390027	0.864909	0.801255	0.93362	0.000198394	143	Inverse variance weighted	0.0345877	0.0130975	1.03519	1.00896	1.06211	0.00827118	24	Inverse variance weighted	-0.332991	0.0489265675476193	0.716777	0.537427	0.95598	0.0234265	-0.145131	0.0345877	-0.332991	-0.0115174	-0.133614	-0.107413	0.0843786812869598	0.0793585198563784	0.740113225057232	-0.581396
5337_64_CD86_B7_2	ENTPD6_O75354_OID20100_v1_Cardiometabolic	105	Inverse variance weighted	-0.148172	0.0388169	0.862283	0.799113	0.930447	0.000134981	111	Inverse variance weighted	-0.0208451	0.00727892	0.979371	0.965498	0.993443	0.00418648	10	Inverse variance weighted	0.562248	0.126980249170372	1.75461	1.12704	2.73164	0.0127907	-0.148172	-0.0208451	0.562248	-0.0117201	-0.136452	-0.260601	0.237161196393426	0.0790980905641581	1.75878070058744	-1.60058
9060_27_IGSF9B_TUTLB	OGN_P20774_OID21123_v1_Neurology	87	Inverse variance weighted	-0.147658	0.0452421	0.862726	0.789518	0.942722	0.00109951	82	Inverse variance weighted	0.020906	0.00902073	1.02113	1.00323	1.03934	0.0204739	6	Inverse variance weighted	-0.556939	0.143020281898627	0.57296	0.346365	0.947795	0.0300986	-0.147658	0.020906	-0.556939	-0.0116433	-0.136015	-0.291963	0.268676409915437	0.0788532073126357	1.97728669910405	-1.81958
5618_50_FAM3B_FAM3B	KDM3A_Q9Y4C1_OID30426_v1_Inflammation_II	15	Inverse variance weighted	-0.482031	0.205717	0.617528	0.412617	0.9242	0.0191202	18	Inverse variance weighted	0.156247	0.0367352	1.16911	1.0879	1.2564	2.11e-05	24	Inverse variance weighted	-0.24266	0.0258083299935128	0.784538	0.64025	0.961343	0.0192733	-0.482031	0.156247	-0.24266	-0.037915	-0.444116	-0.0884993	0.0126693563774214	0.0786567348740556	0.183596760881698	-0.0262833
11465_4_GPR135_GP135	MATN3_O15232_OID20979_v1_Neurology	89	Inverse variance weighted	-0.0841588	0.0386753	0.919285	0.852176	0.99168	0.0295529	82	Inverse variance weighted	0.0176401	0.00773052	1.0178	1.00249	1.03334	0.0224965	14	Inverse variance weighted	-0.374775	0.0670736956896541	0.687444	0.484055	0.976293	0.0362546	-0.0841588	0.0176401	-0.374775	-0.00661107	-0.0775477	-0.138076	0.124853377169681	0.0785546822914002	1.64065480336637	-1.48355
5618_50_FAM3B_FAM3B	SCGN_O76038_OID20457_v1_Inflammation	22	Inverse variance weighted	-0.259314	0.130132	0.771581	0.597875	0.995754	0.0462949	22	Inverse variance weighted	0.0839369	0.0405967	1.08756	1.00438	1.17763	0.0386795	24	Inverse variance weighted	-0.24266	0.0253916615093156	0.784538	0.64025	0.961343	0.0192733	-0.259314	0.0839369	-0.24266	-0.0203682	-0.238946	-0.0701358	0.0293994775596077	0.0785463452843275	0.27046667042855	-0.113374
15305_7_SCGN_Secretagogin	BTN2A1_Q7KYR7_OID20713_v1_Inflammation	133	Inverse variance weighted	-0.145131	0.0390027	0.864909	0.801255	0.93362	0.000198394	143	Inverse variance weighted	0.0304822	0.00965921	1.03095	1.01162	1.05066	0.00160078	12	Inverse variance weighted	-0.372615	0.0672526864607371	0.688931	0.483662	0.981316	0.0389704	-0.145131	0.0304822	-0.372615	-0.0113581	-0.133773	-0.143173	0.120457153787609	0.078261033475472	0.986510502909019	-0.829988
5708_1_LEAP2_LEAP2	TSC1_Q92574_OID30478_v1_Inflammation_II	7	Inverse variance weighted	-0.535904	0.247104	0.58514	0.360513	0.949728	0.0301026	8	Inverse variance weighted	0.17313	0.0462337	1.18902	1.08601	1.3018	0.000180639	50	Inverse variance weighted	-0.241684	0.0200662650393771	0.785305	0.676442	0.911687	0.0015015	-0.535904	0.17313	-0.241684	-0.0418425	-0.494062	-0.0811724	-0.00251267	0.0780784270775037	0.151468197679092	0.00468865647591536
13430_50_SLC14A1_UT1	MME_P08473_OID21307_v1_Oncology	89	Inverse variance weighted	-0.142375	0.0482966	0.867296	0.788962	0.953406	0.00319901	84	Inverse variance weighted	0.0255875	0.0121181	1.02592	1.00184	1.05058	0.0347286	10	Inverse variance weighted	-0.434122	0.0941042583103084	0.647833	0.423591	0.990786	0.045209	-0.142375	0.0255875	-0.434122	-0.0111081	-0.131267	-0.195552	0.1733362649055	0.0780196544503654	1.37349847450434	-1.21746
9294_45_MFAP2_MFAP2	CD27_P26842_OID21527_v1_Oncology	42	Inverse variance weighted	0.179611	0.0807451	1.19675	1.02158	1.40196	0.02612	44	Inverse variance weighted	0.053406	0.0226529	1.05486	1.00905	1.10275	0.0183948	29	Inverse variance weighted	0.261103	0.0270801519195445	1.29836	1.05974	1.59071	0.0117343	0.179611	0.053406	0.261103	0.0139444590560965	0.165666797943904	-0.0391326	0.0670215568184037	0.0776368880715337	-0.217874	0.373147863546235
8815_1_OLFML1_OLFL1	PSG1_P11464_OID20916_v1_Neurology	155	Inverse variance weighted	0.0677669	0.0228798	1.07012	1.02319	1.1192	0.00305781	152	Inverse variance weighted	-0.0104957	0.00488031	0.989559	0.980139	0.99907	0.0315055	9	Inverse variance weighted	-0.49815	0.109647663677411	0.607654	0.394725	0.935444	0.0236242	0.0677669	-0.0104957	-0.49815	0.00522844517546058	0.0625384808245394	-0.209681	0.220137865983186	0.0771533472753446	-3.09415	3.24845583202617
10011_65_OCRL_OCRL	LTB_Q06643_OID31383_v1_Oncology_II	65	Inverse variance weighted	0.203691	0.0727948	1.22592	1.06291	1.41392	0.00513951	77	Inverse variance weighted	-0.0660583	0.0254405	0.936076	0.890545	0.983936	0.0094158	43	Inverse variance weighted	-0.236864	0.0215192214818233	0.789098	0.660745	0.942385	0.00891818	0.203691	-0.0660583	-0.236864	0.0156468361042723	0.188044580895728	-0.0265308	0.057824510208646	0.0768163741738431	-0.13025	0.283882900223754
11275_94_LRP1B_LRP1B	PI16_Q6UXB8_OID30676_v1_Inflammation_II	76	Inverse variance weighted	-0.111142	0.055674	0.894812	0.802308	0.997981	0.0459018	76	Inverse variance weighted	0.0370882	0.0119121	1.03778	1.01384	1.0623	0.00184895	21	Inverse variance weighted	-0.227723	0.0240420606698983	0.796345	0.647513	0.979386	0.0309804	-0.111142	0.0370882	-0.227723	-0.00844583	-0.102696	-0.0555683	0.0386766084374757	0.0759915045760203	0.499976456993377	-0.347993
17712_7_IDI1_IDI1	TCN2_P20062_OID20341_v1_Cardiometabolic	127	Inverse variance weighted	0.158633	0.0418706	1.17191	1.07957	1.27214	0.000151476	124	Inverse variance weighted	-0.0151681	0.0068092	0.984946	0.971889	0.99818	0.0259077	5	Inverse variance weighted	-0.793232	0.235034473872423	0.45238	0.253098	0.808572	0.0074256	0.158633	-0.0151681	-0.793232	0.0120318550329789	0.146600759967021	-0.448636	0.472699423822928	0.0758472968057604	-2.82814	2.97983755624862
9343_16_IL2RB_IL_2_sRb	CEACAM6_P40199_OID30362_v1_Cardiometabolic_II	57	Inverse variance weighted	0.192627	0.0816074	1.21243	1.03322	1.42273	0.0182548	60	Inverse variance weighted	0.0571929	0.0282624	1.05886	1.0018	1.11917	0.0430074	36	Inverse variance weighted	0.25498	0.0257903226513315	1.29044	1.05879	1.57277	0.0115414	0.192627	0.0571929	0.25498	0.0145830601735344	0.178043949826466	-0.035966	0.065132092570144	0.0757062063805816	-0.186713	0.33812544030115
8932_1_ENTPD6_ENTP6	LY75_O60449_OID20580_v1_Inflammation	173	Inverse variance weighted	0.115247	0.0206121	1.12215	1.07772	1.16841	2.25e-08	173	Inverse variance weighted	-0.0147555	0.00521252	0.985353	0.975337	0.995471	0.00464357	18	Inverse variance weighted	-0.590265	0.129851539814411	0.554181	0.360075	0.852922	0.00729302	0.115247	-0.0147555	-0.590265	0.00870962607835796	0.106537386921642	-0.245799	0.263218644114604	0.0755735515536351	-2.1328	2.28395198506883
5005_4_MAPK12_MK12	SLMAP_Q14BN4_OID31441_v1_Oncology_II	4	Inverse variance weighted	-1.26651	0.364859	0.281812	0.137843	0.576148	0.00051806	4	Inverse variance weighted	0.371771	0.118874	1.4503	1.14887	1.83082	0.00176331	23	Inverse variance weighted	-0.257155	0.0531080783609046	0.773248	0.617777	0.967846	0.0247444	-1.26651	0.371771	-0.257155	-0.0956029	-1.17091	-0.199695	0.0084888955432226	0.0754850495097032	0.157672661863939	-0.00670256
9959_60_TMEM59L_TM59L	SLMAP_Q14BN4_OID31441_v1_Oncology_II	4	Inverse variance weighted	-1.26651	0.364859	0.281812	0.137843	0.576148	0.00051806	4	Inverse variance weighted	0.313727	0.118493	1.36852	1.08489	1.72629	0.00810564	17	Inverse variance weighted	-0.302982	0.0589394913485737	0.738612	0.549438	0.992921	0.0447429	-1.26651	0.313727	-0.302982	-0.0950536	-1.17146	-0.210575	0.020467804975552	0.0750513080769403	0.166263346185221	-0.0161607
13672_3_HSPA6_HSP76	PI16_Q6UXB8_OID30676_v1_Inflammation_II	76	Inverse variance weighted	-0.111142	0.055674	0.894812	0.802308	0.997981	0.0459018	76	Inverse variance weighted	0.0305538	0.0120372	1.03103	1.00699	1.05564	0.0111399	27	Inverse variance weighted	-0.271159	0.0357943505445097	0.762495	0.588678	0.987634	0.0399497	-0.111142	0.0305538	-0.271159	-0.00828494	-0.102857	-0.0784419	0.0618719877348896	0.0745438837555107	0.70578203845435	-0.556694
6626_81_CHST12_CHSTC	DPP6_P42658_OID21354_v1_Oncology	45	Inverse variance weighted	-0.213294	0.0793609	0.807918	0.691535	0.943889	0.00719566	46	Inverse variance weighted	0.0759416	0.0322254	1.0789	1.01286	1.14924	0.0184444	29	Inverse variance weighted	-0.209261	0.018826767625873	0.811184	0.681062	0.966166	0.0189839	-0.213294	0.0759416	-0.209261	-0.0158916	-0.197403	-0.0527921	0.0210088759011853	0.0745054308913427	0.247507958987706	-0.0984971
4931_59_F3_TF	LRRN1_Q6UXK5_OID20438_v1_Inflammation	103	Inverse variance weighted	0.0783139	0.0390483	1.08146	1.00178	1.16748	0.0449023	102	Inverse variance weighted	-0.0165999	0.00661165	0.983537	0.970874	0.996366	0.0120491	13	Inverse variance weighted	-0.347664	0.0593338240091931	0.706336	0.505521	0.986923	0.0416369	0.0783139	-0.0165999	-0.347664	0.00577119354876491	0.0725427404512351	-0.110523	0.122065488606783	0.0736930614258876	-1.41128	1.55866883927429
17231_1_LCP1_L_plastin	PECR_Q9BY49_OID30228_v1_Cardiometabolic_II	19	Inverse variance weighted	0.296853	0.114612	1.34562	1.07488	1.68454	0.00959588	17	Inverse variance weighted	0.079578	0.0216621	1.08283	1.03782	1.12979	0.000239146	19	Inverse variance weighted	0.274412	0.0276369333976724	1.31576	1.08047	1.60228	0.00633356	0.296853	0.079578	0.274412	0.021837122240749	0.275015784759251	-0.0323313	0.0760055117001869	0.0735620966674549	-0.108913	0.256037619669283
6986_17_HS3ST3B1_HS3SB	CASP4_P49662_OID31276_v1_Oncology_II	7	Inverse variance weighted	-0.496491	0.205301	0.608663	0.407025	0.91019	0.0155906	7	Inverse variance weighted	0.109269	0.0421037	1.11546	1.02711	1.21142	0.00945268	24	Inverse variance weighted	-0.332991	0.0491403050967082	0.716777	0.537427	0.95598	0.0234265	-0.496491	0.109269	-0.332991	-0.0363855	-0.460105	-0.132701	0.059929464247663	0.0732854315450294	0.267276984396632	-0.120706
8815_1_OLFML1_OLFL1	OGN_P20774_OID21123_v1_Neurology	87	Inverse variance weighted	-0.147658	0.0452421	0.862726	0.789518	0.942722	0.00109951	82	Inverse variance weighted	0.0216121	0.00907739	1.02185	1.00383	1.04019	0.0172717	9	Inverse variance weighted	-0.49815	0.109647827216826	0.607654	0.394725	0.935444	0.0236242	-0.147658	0.0216121	-0.49815	-0.0107661	-0.136892	-0.225676	0.204143679368594	0.0729119244963557	1.52836359000296	-1.38254
7898_29_MDM1_MDM1	LY75_O60449_OID20580_v1_Inflammation	173	Inverse variance weighted	0.115247	0.0206121	1.12215	1.07772	1.16841	2.25e-08	173	Inverse variance weighted	-0.0150814	0.00523031	0.985032	0.974985	0.995182	0.00393325	9	Inverse variance weighted	-0.557099	0.13128546547824	0.572869	0.360959	0.909185	0.0180787	0.115247	-0.0150814	-0.557099	0.0084018427753299	0.10684517022467	-0.248918	0.265721355112681	0.0729029113781014	-2.15986	2.30566804462586
13378_80_C5orf63_YD286	BTN2A1_Q7KYR7_OID20713_v1_Inflammation	133	Inverse variance weighted	-0.145131	0.0390027	0.864909	0.801255	0.93362	0.000198394	143	Inverse variance weighted	0.0367858	0.0120363	1.03747	1.01328	1.06224	0.00224141	22	Inverse variance weighted	-0.286723	0.0409121904265804	0.75072	0.567578	0.992956	0.0444794	-0.145131	0.0367858	-0.286723	-0.0105473	-0.134584	-0.0907352	0.069640570705358	0.0726744361424082	0.625194747282683	-0.479846
2997_8_JAM2_JAM_B	PSG1_P11464_OID20916_v1_Neurology	155	Inverse variance weighted	0.0677669	0.0228798	1.07012	1.02319	1.1192	0.00305781	152	Inverse variance weighted	-0.0114594	0.00480397	0.988606	0.979341	0.997958	0.0170603	11	Inverse variance weighted	-0.428011	0.0864373670461876	0.651804	0.438746	0.968326	0.0340587	0.0677669	-0.0114594	-0.428011	0.00490475823877334	0.0628621677612267	-0.164512	0.174321997649301	0.0723768736208182	-2.42762	2.57237575818772
11275_94_LRP1B_LRP1B	KDM3A_Q9Y4C1_OID30426_v1_Inflammation_II	15	Inverse variance weighted	-0.482031	0.205717	0.617528	0.412617	0.9242	0.0191202	18	Inverse variance weighted	0.152898	0.0320177	1.16521	1.09433	1.24067	1.79e-06	21	Inverse variance weighted	-0.227723	0.0245314289110092	0.796345	0.647513	0.979386	0.0309804	-0.482031	0.152898	-0.227723	-0.0348185	-0.447212	-0.0829001	0.013263149520429	0.0722328318034706	0.17198081195457	-0.0275151
13378_80_C5orf63_YD286	LTB_Q06643_OID31383_v1_Oncology_II	65	Inverse variance weighted	0.203691	0.0727948	1.22592	1.06291	1.41392	0.00513951	77	Inverse variance weighted	-0.0512055	0.0217024	0.950083	0.910518	0.991369	0.0183025	22	Inverse variance weighted	-0.286723	0.0409248851749356	0.75072	0.567578	0.992956	0.0444794	0.203691	-0.0512055	-0.286723	0.0146817821450001	0.18901	-0.065531	0.0948945570878739	0.072078550786458	-0.321717	0.465874107439068
6600_70_RELL2_RELL2	LRRN1_Q6UXK5_OID20438_v1_Inflammation	103	Inverse variance weighted	0.0783139	0.0390483	1.08146	1.00178	1.16748	0.0449023	102	Inverse variance weighted	-0.0130802	0.00652378	0.987005	0.974465	0.999706	0.0449624	10	Inverse variance weighted	-0.431535	0.084952250698735	0.649511	0.441586	0.955339	0.0283732	0.0783139	-0.0130802	-0.431535	0.00564457407233054	0.0726693599276695	-0.160862	0.172150985441851	0.0720762421707808	-2.05406	2.19821654524278
2997_8_JAM2_JAM_B	OGN_P20774_OID21123_v1_Neurology	87	Inverse variance weighted	-0.147658	0.0452421	0.862726	0.789518	0.942722	0.00109951	82	Inverse variance weighted	0.0247135	0.0102162	1.02502	1.0047	1.04575	0.0155613	11	Inverse variance weighted	-0.428011	0.0864377182550732	0.651804	0.438746	0.968326	0.0340587	-0.147658	0.0247135	-0.428011	-0.0105777	-0.137081	-0.179996	0.158840264148403	0.0716360182341912	1.21899957472454	-1.07573
9321_400_NMB_NMB	GLB1_P16278_OID20949_v1_Neurology	63	Inverse variance weighted	0.138124	0.0590407	1.14812	1.02266	1.28897	0.0193113	62	Inverse variance weighted	0.0323423	0.0159461	1.03287	1.00109	1.06566	0.0425369	24	Inverse variance weighted	0.304277	0.0376389310250041	1.35564	1.0638	1.72755	0.0138925	0.138124	0.0323423	0.304277	0.00984100483929281	0.128282658160707	-0.0639313	0.0836133096483008	0.0712477835118868	-0.462856	0.60535108780239
9095_5_MTFR1_MTFR1	MME_P08473_OID21307_v1_Oncology	89	Inverse variance weighted	-0.142375	0.0482966	0.867296	0.788962	0.953406	0.00319901	84	Inverse variance weighted	0.0338589	0.012201	1.03444	1.00999	1.05947	0.00551849	8	Inverse variance weighted	-0.297139	0.0370393719171483	0.742941	0.581907	0.948538	0.0171316	-0.142375	0.0338589	-0.297139	-0.0100608	-0.132315	-0.082658	0.0625363794818051	0.0706638069489119	0.580563387354099	-0.439236
13111_79_BCL6_BCL6	ALDH5A1_P51649_OID31047_v1_Neurology_II	11	Inverse variance weighted	0.446237	0.160841	1.56242	1.13995	2.14146	0.0055305	13	Inverse variance weighted	-0.103459	0.0440272	0.901713	0.827164	0.982981	0.0187791	23	Inverse variance weighted	-0.303377	0.0424810855911806	0.73832	0.562003	0.969954	0.0293226	0.446237	-0.103459	-0.303377	0.0313871103918939	0.414850022608106	-0.0518758	0.114650038150608	0.0703372894606103	-0.116252	0.256926261111058
13565_2_RBL2_p130	MST1_P26927_OID30713_v1_Inflammation_II	186	Inverse variance weighted	-0.0619263	0.0216835	0.939952	0.900842	0.980761	0.00429115	186	Inverse variance weighted	0.0457405	0.0202644	1.0468	1.00604	1.08922	0.0239967	151	Inverse variance weighted	-0.0945989	0.00396335627372702	0.909738	0.839928	0.985349	0.0202156	-0.0619263	0.0457405	-0.0945989	-0.00432699	-0.0575994	-0.0120952	0.00344118423654155	0.0698732327931987	0.195315450408666	-0.055569
15447_45_SORD_Sorbitol_dehydrogenase	MME_P08473_OID21307_v1_Oncology	89	Inverse variance weighted	-0.142375	0.0482966	0.867296	0.788962	0.953406	0.00319901	84	Inverse variance weighted	0.045216	0.015573	1.04625	1.0148	1.07868	0.00369043	46	Inverse variance weighted	-0.219927	0.0192759242069934	0.802577	0.675974	0.952892	0.0120419	-0.142375	0.045216	-0.219927	-0.00994421	-0.132431	-0.047725	0.027836597364606	0.0698450182041322	0.335205502368218	-0.195515
5618_50_FAM3B_FAM3B	ADAM23_O75077_OID20651_v1_Inflammation	108	Inverse variance weighted	-0.0661019	0.0288822	0.936035	0.884519	0.990552	0.0220985	104	Inverse variance weighted	0.018921	0.00595813	1.0191	1.00727	1.03107	0.00149498	24	Inverse variance weighted	-0.24266	0.025162227674655	0.784538	0.64025	0.961343	0.0192733	-0.0661019	0.018921	-0.24266	-0.00459137	-0.0615106	-0.0539093	0.0447265977313326	0.0694589239337619	0.815548648074377	-0.676631
9959_60_TMEM59L_TM59L	LTB_Q06643_OID31383_v1_Oncology_II	65	Inverse variance weighted	0.203691	0.0727948	1.22592	1.06291	1.41392	0.00513951	77	Inverse variance weighted	-0.0466503	0.0199493	0.954421	0.917823	0.992479	0.0193641	17	Inverse variance weighted	-0.302982	0.0457470149858921	0.738612	0.549438	0.992921	0.0447429	0.203691	-0.0466503	-0.302982	0.0141342099849985	0.189557207015001	-0.0755299	0.103798359357347	0.0693903071281523	-0.370806	0.509586318786064
15447_45_SORD_Sorbitol_dehydrogenase	ADAM23_O75077_OID20651_v1_Inflammation	108	Inverse variance weighted	-0.0661019	0.0288822	0.936035	0.884519	0.990552	0.0220985	104	Inverse variance weighted	0.0208307	0.00625275	1.02105	1.00861	1.03364	0.000863942	46	Inverse variance weighted	-0.219927	0.0192634989526806	0.802577	0.675974	0.952892	0.0120419	-0.0661019	0.0208307	-0.219927	-0.00458124	-0.0615207	-0.0423377	0.0331752144649093	0.0693057509543107	0.640491212171053	-0.50188
9343_16_IL2RB_IL_2_sRb	FST_P19883_OID20770_v1_Inflammation	20	Inverse variance weighted	-0.317046	0.135903	0.728297	0.557989	0.950586	0.019654	19	Inverse variance weighted	-0.086119	0.0381813	0.917485	0.851331	0.98878	0.0241003	36	Inverse variance weighted	0.25498	0.0259487915860489	1.29044	1.05879	1.57277	0.0115414	-0.317046	-0.086119	0.25498	-0.0219586	-0.295087	-0.0728182	0.0289010151230069	0.0692600243639978	0.22967720437064	-0.0911572
16773_29_SCUBE3_SCUB3	ITIH4_Q14624_OID30762_v1_Inflammation_II	43	Inverse variance weighted	-0.161842	0.0737425	0.850576	0.736109	0.982842	0.0281859	43	Inverse variance weighted	0.0408305	0.0178991	1.04168	1.00576	1.07887	0.0225399	22	Inverse variance weighted	-0.272963	0.0371197816118949	0.761121	0.58307	0.993544	0.0446815	-0.161842	0.0408305	-0.272963	-0.0111452	-0.150697	-0.0839	0.061609561523759	0.0688648235024199	0.518407212935772	-0.380678
6986_17_HS3ST3B1_HS3SB	PKD1_P98161_OID30328_v1_Cardiometabolic_II	61	Inverse variance weighted	-0.161238	0.0676922	0.851089	0.74534	0.971843	0.0172221	55	Inverse variance weighted	0.0328846	0.0165221	1.03343	1.0005	1.06744	0.0465539	24	Inverse variance weighted	-0.332991	0.0489274870750217	0.716777	0.537427	0.95598	0.0234265	-0.161238	0.0328846	-0.332991	-0.0109503	-0.150288	-0.106848	0.0849476240849026	0.0679135022208994	0.662672542237959	-0.526846
5491_12_SPOCK2_Testican_2	STAB2_Q8WWQ8_OID30401_v1_Cardiometabolic_II	120	Inverse variance weighted	-0.0957426	0.0483882	0.908698	0.826477	0.999099	0.047857	125	Inverse variance weighted	-0.0315472	0.0142588	0.968945	0.942241	0.996406	0.0269334	47	Inverse variance weighted	0.205713	0.0193356510695417	1.2284	1.02177	1.47682	0.0285836	-0.0957426	-0.0315472	0.205713	-0.00648968	-0.0892529	-0.0443876	0.0314081992123791	0.067782552020688	0.463613469941277	-0.328048
11358_15_GRB10_GRB10	TCN2_P20062_OID20341_v1_Cardiometabolic	127	Inverse variance weighted	0.158633	0.0418706	1.17191	1.07957	1.27214	0.000151476	124	Inverse variance weighted	-0.021943	0.00689346	0.978296	0.965167	0.991604	0.00145673	7	Inverse variance weighted	-0.48913	0.106846280847534	0.61316	0.399607	0.940837	0.0251441	0.158633	-0.021943	-0.48913	0.0107329919818249	0.147899623018175	-0.198686	0.220151702442991	0.0676594279292747	-1.25249	1.3878085691457
8099_42_SPON2_SPON2	TSC1_Q92574_OID30478_v1_Inflammation_II	7	Inverse variance weighted	-0.535904	0.247104	0.58514	0.360513	0.949728	0.0301026	8	Inverse variance weighted	0.16861	0.0404211	1.18366	1.0935	1.28125	3.03e-05	36	Inverse variance weighted	-0.214675	0.0176075052421376	0.806804	0.695655	0.935712	0.00453073	-0.535904	0.16861	-0.214675	-0.0361963	-0.499708	-0.070707	-0.00168555	0.0675424246220553	0.13193959908631	0.00314525015780046
16773_29_SCUBE3_SCUB3	TSC1_Q92574_OID30478_v1_Inflammation_II	7	Inverse variance weighted	-0.535904	0.247104	0.58514	0.360513	0.949728	0.0301026	8	Inverse variance weighted	0.132273	0.0398888	1.14142	1.05558	1.23424	0.000913038	22	Inverse variance weighted	-0.272963	0.0374857631581054	0.761121	0.58307	0.993544	0.0446815	-0.535904	0.132273	-0.272963	-0.0361056	-0.499799	-0.109578	0.0373665264260563	0.0673731902633661	0.204472523577277	-0.0697261
17231_1_LCP1_L_plastin	CEACAM6_P40199_OID30362_v1_Cardiometabolic_II	57	Inverse variance weighted	0.192627	0.0816074	1.21243	1.03322	1.42273	0.0182548	60	Inverse variance weighted	0.0471267	0.0199009	1.04825	1.00815	1.08995	0.017881	19	Inverse variance weighted	0.274412	0.0275990599311564	1.31576	1.08047	1.60228	0.00633356	0.192627	0.0471267	0.274412	0.0129321172354646	0.179694892764535	-0.041162	0.0670262747005313	0.0671355342922295	-0.213688	0.347958859458657
6604_59_NDNF_CD031	OGN_P20774_OID21123_v1_Neurology	87	Inverse variance weighted	-0.147658	0.0452421	0.862726	0.789518	0.942722	0.00109951	82	Inverse variance weighted	0.0194038	0.00913967	1.01959	1.00149	1.03802	0.0337515	12	Inverse variance weighted	-0.505369	0.106469131606161	0.603283	0.3992	0.911699	0.0164488	-0.147658	0.0194038	-0.505369	-0.00980607	-0.137852	-0.218486	0.198873423988869	0.0664105153479197	1.47966856937938	-1.34685
5005_4_MAPK12_MK12	PI16_Q6UXB8_OID30676_v1_Inflammation_II	76	Inverse variance weighted	-0.111142	0.055674	0.894812	0.802308	0.997981	0.0459018	76	Inverse variance weighted	0.0286616	0.0116857	1.02908	1.00577	1.05292	0.0141786	23	Inverse variance weighted	-0.257155	0.0294530972948829	0.773248	0.617777	0.967846	0.0247444	-0.111142	0.0286616	-0.257155	-0.00737047	-0.103771	-0.0650985	0.0503576017299558	0.0663159209663741	0.585725227288848	-0.453093
5005_4_MAPK12_MK12	LTB_Q06643_OID31383_v1_Oncology_II	65	Inverse variance weighted	0.203691	0.0727948	1.22592	1.06291	1.41392	0.00513951	77	Inverse variance weighted	-0.0524371	0.0163265	0.948914	0.91903	0.97977	0.00131917	23	Inverse variance weighted	-0.257155	0.0294636334016396	0.773248	0.617777	0.967846	0.0247444	0.203691	-0.0524371	-0.257155	0.0134844651485706	0.190206951851429	-0.0442643	0.0712331866157841	0.0662004582577507	-0.21731	0.349711282217572
12560_9_NT5C_NT5C	STAB2_Q8WWQ8_OID30401_v1_Cardiometabolic_II	120	Inverse variance weighted	-0.0957426	0.0483882	0.908698	0.826477	0.999099	0.047857	125	Inverse variance weighted	0.0341129	0.00978397	1.0347	1.01505	1.05473	0.000489176	36	Inverse variance weighted	-0.185497	0.010674382801551	0.830692	0.742131	0.92982	0.00125934	-0.0957426	0.0341129	-0.185497	-0.00632783	-0.0894148	-0.0272496	0.0145939553166178	0.0660921662208909	0.284613421459585	-0.152429
11275_94_LRP1B_LRP1B	ADAM23_O75077_OID20651_v1_Inflammation	108	Inverse variance weighted	-0.0661019	0.0288822	0.936035	0.884519	0.990552	0.0220985	104	Inverse variance weighted	0.0190627	0.00623952	1.01925	1.00686	1.03179	0.00224946	21	Inverse variance weighted	-0.227723	0.0240382953232886	0.796345	0.647513	0.979386	0.0309804	-0.0661019	0.0190627	-0.227723	-0.00434101	-0.0617609	-0.0514561	0.0427740470173907	0.0656714896264593	0.778435294105822	-0.647092
9294_45_MFAP2_MFAP2	PKN3_Q6P5Z2_OID31311_v1_Oncology_II	7	Inverse variance weighted	-0.511181	0.186426	0.599787	0.416205	0.864343	0.00610655	7	Inverse variance weighted	-0.128447	0.0490237	0.87946	0.798889	0.968157	0.00879016	29	Inverse variance weighted	0.261103	0.0277762990668378	1.29836	1.05974	1.59071	0.0117343	-0.511181	-0.128447	0.261103	-0.033538	-0.477643	-0.0879796	0.0209035374115833	0.0656088394529185	0.17211029241407	-0.0408926
5618_50_FAM3B_FAM3B	ITIH4_Q14624_OID30762_v1_Inflammation_II	43	Inverse variance weighted	-0.161842	0.0737425	0.850576	0.736109	0.982842	0.0281859	43	Inverse variance weighted	0.043672	0.0181601	1.04464	1.00811	1.08249	0.0161798	24	Inverse variance weighted	-0.24266	0.0251744708254969	0.784538	0.64025	0.961343	0.0192733	-0.161842	0.043672	-0.24266	-0.0105975	-0.151244	-0.0599394	0.0387444901277705	0.0654804223394839	0.370358071834802	-0.239397
19553_14_STX1A_STX1a	ADAM23_O75077_OID20651_v1_Inflammation	108	Inverse variance weighted	-0.0661019	0.0288822	0.936035	0.884519	0.990552	0.0220985	104	Inverse variance weighted	0.0188155	0.00661279	1.01899	1.00587	1.03229	0.00443663	40	Inverse variance weighted	-0.22952	0.0225211275135041	0.794915	0.655841	0.963481	0.0193275	-0.0661019	0.0188155	-0.22952	-0.00431855	-0.0617834	-0.04846	0.0398228646488651	0.0653316123991023	0.733109602136104	-0.602446
3327_27_NTN4_NET4	ADAM23_O75077_OID20651_v1_Inflammation	108	Inverse variance weighted	-0.0661019	0.0288822	0.936035	0.884519	0.990552	0.0220985	104	Inverse variance weighted	0.021199	0.00801569	1.02143	1.0055	1.0376	0.00817653	29	Inverse variance weighted	-0.201931	0.0167002766037554	0.817151	0.694877	0.960941	0.0146152	-0.0661019	0.021199	-0.201931	-0.00428075	-0.0618212	-0.0370133	0.0284517943241232	0.0647598066772979	0.559942702463518	-0.430423
6626_81_CHST12_CHSTC	PSG1_P11464_OID20916_v1_Neurology	155	Inverse variance weighted	0.0677669	0.0228798	1.07012	1.02319	1.1192	0.00305781	152	Inverse variance weighted	-0.0208359	0.00473449	0.97938	0.970333	0.98851	1.08e-05	29	Inverse variance weighted	-0.209261	0.0186672941599307	0.811184	0.681062	0.966166	0.0189839	0.0677669	-0.0208359	-0.209261	0.00436012774750041	0.0634067982524996	-0.0322278	0.0409480243009646	0.0643400550218319	-0.475568	0.604247923256319
10011_65_OCRL_OCRL	ADAM23_O75077_OID20651_v1_Inflammation	108	Inverse variance weighted	-0.0661019	0.0288822	0.936035	0.884519	0.990552	0.0220985	104	Inverse variance weighted	0.0178137	0.00852757	1.01797	1.0011	1.03513	0.0367116	43	Inverse variance weighted	-0.236864	0.0214540368826842	0.789098	0.660745	0.942385	0.00891818	-0.0661019	0.0178137	-0.236864	-0.00421943	-0.0618825	-0.0462693	0.0378304788948489	0.0638322327079644	0.699969726830844	-0.572305
9060_27_IGSF9B_TUTLB	LY75_O60449_OID20580_v1_Inflammation	173	Inverse variance weighted	0.115247	0.0206121	1.12215	1.07772	1.16841	2.25e-08	173	Inverse variance weighted	-0.0131873	0.00510798	0.986899	0.977068	0.996829	0.00983123	6	Inverse variance weighted	-0.556939	0.143020173425829	0.57296	0.346365	0.947795	0.0300986	0.115247	-0.0131873	-0.556939	0.00734453642717043	0.10790247657283	-0.272975	0.287664076341795	0.0637286488906261	-2.36861	2.49606535435148
2833_20_KLK4_Kallikrein_4	LY75_O60449_OID20580_v1_Inflammation	173	Inverse variance weighted	0.115247	0.0206121	1.12215	1.07772	1.16841	2.25e-08	173	Inverse variance weighted	-0.0123723	0.00556012	0.987704	0.976999	0.998527	0.0260686	5	Inverse variance weighted	-0.587481	0.151091663663594	0.555725	0.335691	0.919985	0.0223556	0.115247	-0.0123723	-0.587481	0.00726849695933515	0.107978516040665	-0.288871	0.30340815773998	0.0630688533275491	-2.50654	2.63267697653891
4931_59_F3_TF	MST1_P26927_OID30713_v1_Inflammation_II	186	Inverse variance weighted	-0.0619263	0.0216835	0.939952	0.900842	0.980761	0.00429115	186	Inverse variance weighted	0.0112033	0.00467217	1.01127	1.00205	1.02057	0.0164903	13	Inverse variance weighted	-0.347664	0.0593337455903043	0.706336	0.505521	0.986923	0.0416369	-0.0619263	0.0112033	-0.347664	-0.00389499	-0.0580314	-0.120189	0.112399147346167	0.0628972028792344	1.94084006550274	-1.81505
6600_70_RELL2_RELL2	BTN2A1_Q7KYR7_OID20713_v1_Inflammation	133	Inverse variance weighted	-0.145131	0.0390027	0.864909	0.801255	0.93362	0.000198394	143	Inverse variance weighted	0.0211353	0.0105892	1.02136	1.00038	1.04278	0.0459411	10	Inverse variance weighted	-0.431535	0.0849525026446776	0.649511	0.441586	0.955339	0.0283732	-0.145131	0.0211353	-0.431535	-0.00912061	-0.136011	-0.175628	0.157386299266099	0.0628439009423841	1.21012989819583	-1.08444
7738_299_STX2_STX2	ADAM23_O75077_OID20651_v1_Inflammation	108	Inverse variance weighted	-0.0661019	0.0288822	0.936035	0.884519	0.990552	0.0220985	104	Inverse variance weighted	0.0208764	0.00679869	1.0211	1.00758	1.03479	0.00213591	52	Inverse variance weighted	-0.198132	0.0145981567051608	0.820262	0.709968	0.94769	0.00716146	-0.0661019	0.0208764	-0.198132	-0.00413628	-0.0619656	-0.0327487	0.0244761110653525	0.0625742160963835	0.495426777878325	-0.370278
11441_11_PYGL_PYGL	OGN_P20774_OID21123_v1_Neurology	87	Inverse variance weighted	-0.147658	0.0452421	0.862726	0.789518	0.942722	0.00109951	82	Inverse variance weighted	0.0213082	0.00892496	1.02154	1.00382	1.03956	0.0169639	26	Inverse variance weighted	-0.433585	0.0777611487210204	0.648181	0.456074	0.921207	0.0156227	-0.147658	0.0213082	-0.433585	-0.00923893	-0.13842	-0.161651	0.14317291818602	0.0625696200892758	1.09476146821327	-0.969622
5315_22_TNNT2_Troponin_T	LY75_O60449_OID20580_v1_Inflammation	173	Inverse variance weighted	0.115247	0.0206121	1.12215	1.07772	1.16841	2.25e-08	173	Inverse variance weighted	-0.0151741	0.00547361	0.98494	0.97443	0.995564	0.0055673	14	Inverse variance weighted	-0.472326	0.0849171956671489	0.62355	0.438364	0.886968	0.00860993	0.115247	-0.0151741	-0.472326	0.00716712243882194	0.108079890561178	-0.159271	0.173604825946434	0.0621892251456612	-1.38199	1.50637158766478
10011_65_OCRL_OCRL	PI16_Q6UXB8_OID30676_v1_Inflammation_II	76	Inverse variance weighted	-0.111142	0.055674	0.894812	0.802308	0.997981	0.0459018	76	Inverse variance weighted	0.0291439	0.0129822	1.02957	1.00371	1.05611	0.0247742	43	Inverse variance weighted	-0.236864	0.0214568351298488	0.789098	0.660745	0.942385	0.00891818	-0.111142	0.0291439	-0.236864	-0.00690315	-0.104239	-0.0489585	0.0351522494943864	0.0621111867832851	0.44050534136365	-0.316283
9321_400_NMB_NMB	CTBS_Q01459_OID30710_v1_Inflammation_II	101	Inverse variance weighted	0.101137	0.0392149	1.10643	1.02457	1.19482	0.00990743	97	Inverse variance weighted	0.0205822	0.00896041	1.0208	1.00302	1.03888	0.021618	24	Inverse variance weighted	0.304277	0.0376358494124526	1.35564	1.0638	1.72755	0.0138925	0.101137	0.0205822	0.304277	0.00626267828089807	0.0948741867191019	-0.0675036	0.0800289431293053	0.0619228041219002	-0.667448	0.79129349252921
10024_44_HOGA1_HOGA1	RTN4R_Q9BZR6_OID21424_v1_Oncology	65	Inverse variance weighted	0.166198	0.0544379	1.18081	1.06131	1.31376	0.00226572	63	Inverse variance weighted	-0.0256928	0.0117727	0.974634	0.952403	0.997385	0.0290801	10	Inverse variance weighted	-0.397527	0.0760658061319389	0.67198	0.461827	0.977763	0.0377531	0.166198	-0.0256928	-0.397527	0.0102135678493172	0.155984756150683	-0.138875	0.159302547867917	0.0614540965486344	-0.835601	0.958508750472823
5005_4_MAPK12_MK12	FST_P19883_OID20770_v1_Inflammation	20	Inverse variance weighted	-0.317046	0.135903	0.728297	0.557989	0.950586	0.019654	19	Inverse variance weighted	0.0749863	0.0322335	1.07787	1.01188	1.14816	0.0200001	23	Inverse variance weighted	-0.257155	0.0295502116167946	0.773248	0.617777	0.967846	0.0247444	-0.317046	0.0749863	-0.257155	-0.0192831	-0.297763	-0.0772015	0.0386352884951947	0.0608212180620329	0.243502619638911	-0.12186
19553_14_STX1A_STX1a	MILR1_Q7Z6M3_OID20482_v1_Inflammation	114	Inverse variance weighted	0.0790417	0.0362447	1.08225	1.00803	1.16193	0.0291998	111	Inverse variance weighted	-0.0208389	0.00944638	0.979377	0.96141	0.997679	0.0273826	40	Inverse variance weighted	-0.22952	0.0225216441262556	0.794915	0.655841	0.963481	0.0193275	0.0790417	-0.0208389	-0.22952	0.00478295189339799	0.074258752106602	-0.0393595	0.0489253743808589	0.0605117507765013	-0.497958	0.618981776770132
19277_4_TSTD1_KAT	S100A11_P31949_OID20130_v1_Cardiometabolic	16	Inverse variance weighted	0.304764	0.114346	1.35631	1.08399	1.69704	0.00769246	16	Inverse variance weighted	0.104073	0.0243909	1.10968	1.05788	1.16402	1.98e-05	27	Inverse variance weighted	0.176346	0.0132100091956975	1.19285	1.03279	1.37772	0.0164478	0.304764	0.104073	0.176346	0.0183529265041818	0.286411309495818	-0.00753869	0.0442445445277488	0.0602200794458764	-0.0247361	0.145176301223707
12716_3_ZNF175_ZN175	MME_P08473_OID21307_v1_Oncology	89	Inverse variance weighted	-0.142375	0.0482966	0.867296	0.788962	0.953406	0.00319901	84	Inverse variance weighted	0.0268799	0.0128074	1.02724	1.00178	1.05336	0.0358361	20	Inverse variance weighted	-0.317788	0.0432595229679609	0.727757	0.557335	0.95029	0.0195657	-0.142375	0.0268799	-0.317788	-0.00854211	-0.133833	-0.0933308	0.0762465574820815	0.0599970647681577	0.655525862049937	-0.535532
13378_80_C5orf63_YD286	CASP4_P49662_OID31276_v1_Oncology_II	7	Inverse variance weighted	-0.496491	0.205301	0.608663	0.407025	0.91019	0.0155906	7	Inverse variance weighted	0.102911	0.0419552	1.10839	1.02089	1.20339	0.0141715	22	Inverse variance weighted	-0.286723	0.0411370084093792	0.75072	0.567578	0.992956	0.0444794	-0.496491	0.102911	-0.286723	-0.029507	-0.466984	-0.110136	0.0511215177951316	0.0594311633145894	0.221828041504494	-0.102966
7765_15_ITM2A_ITM2A	PSG1_P11464_OID20916_v1_Neurology	155	Inverse variance weighted	0.0677669	0.0228798	1.07012	1.02319	1.1192	0.00305781	152	Inverse variance weighted	-0.010149	0.00467499	0.989902	0.980873	0.999014	0.029937	19	Inverse variance weighted	-0.396445	0.0650177912249391	0.672707	0.487781	0.927742	0.0156352	0.0677669	-0.010149	-0.396445	0.0040235438215042	0.0637433821784958	-0.123411	0.131458414622385	0.0593732674476661	-1.82111	1.9398609673159
9321_400_NMB_NMB	CES1_P23141_OID20244_v1_Cardiometabolic	56	Inverse variance weighted	-0.134492	0.0621073	0.87416	0.77397	0.987319	0.0303509	57	Inverse variance weighted	-0.026173	0.0118217	0.974166	0.951854	0.997002	0.0268297	24	Inverse variance weighted	0.304277	0.037636669389264	1.35564	1.0638	1.72755	0.0138925	-0.134492	-0.026173	0.304277	-0.00796385	-0.126528	-0.0817317	0.0658040246634013	0.0592142049983781	0.607706122137599	-0.489278
19553_14_STX1A_STX1a	IL15_P40933_OID20562_v1_Inflammation	87	Inverse variance weighted	-0.176418	0.067878	0.838268	0.733844	0.95755	0.00934837	87	Inverse variance weighted	0.0454822	0.0180048	1.04653	1.01024	1.08412	0.0115331	40	Inverse variance weighted	-0.22952	0.0225356671301338	0.794915	0.655841	0.963481	0.0193275	-0.176418	0.0454822	-0.22952	-0.0104391	-0.165979	-0.054609	0.0337308278913104	0.0591724169135924	0.309543164646699	-0.191198
19277_4_TSTD1_KAT	BTN2A1_Q7KYR7_OID20713_v1_Inflammation	133	Inverse variance weighted	-0.145131	0.0390027	0.864909	0.801255	0.93362	0.000198394	143	Inverse variance weighted	-0.0484989	0.00879401	0.952658	0.936379	0.969221	3.49e-08	27	Inverse variance weighted	0.176346	0.0129708345194901	1.19285	1.03279	1.37772	0.0164478	-0.145131	-0.0484989	0.176346	-0.0085526	-0.136579	-0.0339754	0.0168702369379626	0.0589301491192761	0.234101643232228	-0.116241
3580_25_SERPINA1_a1_Antitrypsin	FST_P19883_OID20770_v1_Inflammation	20	Inverse variance weighted	-0.317046	0.135903	0.728297	0.557989	0.950586	0.019654	19	Inverse variance weighted	-0.207142	0.0558763	0.812904	0.728579	0.90699	0.000209603	133	Inverse variance weighted	0.089673	0.0119817921992881	1.09382	1.0222	1.17045	0.00944517	-0.317046	-0.207142	0.089673	-0.018575	-0.298471	-0.0420593	0.00490928521194986	0.05858779235105	0.13266003998006	-0.0154845
3181_50_CTSS_Cathepsin_S	ITGB2_P05107_OID20315_v1_Cardiometabolic	53	Inverse variance weighted	0.214538	0.0900278	1.23929	1.03882	1.47845	0.0171713	52	Inverse variance weighted	0.103153	0.0283073	1.10866	1.04883	1.17191	0.000268391	63	Inverse variance weighted	0.121759	0.0080884734071961	1.12948	1.00034	1.2753	0.0493662	0.214538	0.103153	0.121759	0.0125597607394194	0.201978249260581	-0.00329365	0.0284131686175238	0.0585432890862531	-0.0153523	0.132438856021475
17231_1_LCP1_L_plastin	FST_P19883_OID20770_v1_Inflammation	20	Inverse variance weighted	-0.317046	0.135903	0.728297	0.557989	0.950586	0.019654	19	Inverse variance weighted	-0.0674091	0.0292797	0.934813	0.882676	0.990029	0.0213212	19	Inverse variance weighted	0.274412	0.0276536449866758	1.31576	1.08047	1.60228	0.00633356	-0.317046	-0.0674091	0.274412	-0.0184978	-0.298548	-0.072699	0.0357033055444709	0.0583443296997432	0.229301028432966	-0.112612
11465_4_GPR135_GP135	CRELD2_Q6UXH1_OID20751_v1_Inflammation	73	Inverse variance weighted	-0.154382	0.0591511	0.856944	0.763136	0.962283	0.00905502	71	Inverse variance weighted	0.0239587	0.0120101	1.02425	1.00042	1.04864	0.0460561	14	Inverse variance weighted	-0.374775	0.0670741742836196	0.687444	0.484055	0.976293	0.0362546	-0.154382	0.0239587	-0.374775	-0.00897913	-0.145403	-0.140445	0.122486256362125	0.058161555102923	0.909717896812045	-0.793395
11465_4_GPR135_GP135	PSG1_P11464_OID20916_v1_Neurology	155	Inverse variance weighted	0.0677669	0.0228798	1.07012	1.02319	1.1192	0.00305781	152	Inverse variance weighted	-0.0105018	0.00497604	0.989553	0.979949	0.999252	0.0348176	14	Inverse variance weighted	-0.374775	0.0670735774226486	0.687444	0.484055	0.976293	0.0362546	0.0677669	-0.0105018	-0.374775	0.00393580771511793	0.0638311182848821	-0.127528	0.135400019463509	0.0580785930162736	-1.88187	1.99802510539595
11441_11_PYGL_PYGL	LAMP3_Q9UQV4_OID20638_v1_Inflammation	47	Inverse variance weighted	0.322849	0.0879173	1.38106	1.16245	1.64077	0.000240486	47	Inverse variance weighted	-0.0429747	0.0200753	0.957936	0.920975	0.99638	0.0323005	26	Inverse variance weighted	-0.433585	0.0777657018731745	0.648181	0.456074	0.921207	0.0156227	0.322849	-0.0429747	-0.433585	0.0186331667244335	0.304215375275567	-0.133788	0.171053942395856	0.0577148857758617	-0.414397	0.529827210419478
19277_4_TSTD1_KAT	FLT3LG_P49771_OID20661_v1_Inflammation	86	Inverse variance weighted	-0.161176	0.0798605	0.851142	0.727819	0.995362	0.0435687	88	Inverse variance weighted	-0.0526795	0.0153223	0.948684	0.920617	0.977607	0.000585849	27	Inverse variance weighted	0.176346	0.0129889250260222	1.19285	1.03279	1.37772	0.0164478	-0.161176	-0.0526795	0.176346	-0.00928982	-0.151886	-0.0347481	0.0161684756887948	0.0576378027971141	0.215591400506598	-0.100316
13645_14_DHX38_PRP16	ADAM23_O75077_OID20651_v1_Inflammation	108	Inverse variance weighted	-0.0661019	0.0288822	0.936035	0.884519	0.990552	0.0220985	104	Inverse variance weighted	0.0150844	0.00765643	1.0152	1.00008	1.03055	0.0488193	26	Inverse variance weighted	-0.252427	0.0307232254352522	0.776913	0.612027	0.986222	0.0380804	-0.0661019	0.0150844	-0.252427	-0.00380771	-0.0622942	-0.0640252	0.0564098106230425	0.0576036369236668	0.968583502700256	-0.853376
7738_299_STX2_STX2	ITIH4_Q14624_OID30762_v1_Inflammation_II	43	Inverse variance weighted	-0.161842	0.0737425	0.850576	0.736109	0.982842	0.0281859	43	Inverse variance weighted	0.0469339	0.0188056	1.04805	1.01013	1.0874	0.0125694	52	Inverse variance weighted	-0.198132	0.0146241256401046	0.820262	0.709968	0.94769	0.00716146	-0.161842	0.0469339	-0.198132	-0.00929908	-0.152543	-0.0379624	0.0193642022045629	0.0574578457305212	0.23456460924444	-0.119649
19553_14_STX1A_STX1a	BTN2A1_Q7KYR7_OID20713_v1_Inflammation	133	Inverse variance weighted	-0.145131	0.0390027	0.864909	0.801255	0.93362	0.000198394	143	Inverse variance weighted	0.0362813	0.0104173	1.03695	1.01599	1.05834	0.000496233	40	Inverse variance weighted	-0.22952	0.0225239550762824	0.794915	0.655841	0.963481	0.0193275	-0.145131	0.0362813	-0.22952	-0.00832729	-0.136804	-0.0524742	0.0358196651814977	0.0573776774814579	0.361564340114211	-0.246809
9294_45_MFAP2_MFAP2	LGALS1_P09382_OID20154_v1_Cardiometabolic	30	Inverse variance weighted	0.262312	0.0831253	1.29993	1.10449	1.52995	0.00160155	26	Inverse variance weighted	0.0572339	0.0195506	1.0589	1.01909	1.10027	0.00341727	29	Inverse variance weighted	0.261103	0.0270762455810326	1.29836	1.05974	1.59071	0.0117343	0.262312	0.0572339	0.261103	0.0149439486072967	0.247368210392703	-0.0381255	0.0680133899461206	0.0569700949596343	-0.145344	0.259284168165916
3327_27_NTN4_NET4	MATN3_O15232_OID20979_v1_Neurology	89	Inverse variance weighted	-0.0841588	0.0386753	0.919285	0.852176	0.99168	0.0295529	82	Inverse variance weighted	0.0237406	0.00916266	1.02402	1.0058	1.04258	0.00956926	29	Inverse variance weighted	-0.201931	0.0167008287847521	0.817151	0.694877	0.960941	0.0146152	-0.0841588	0.0237406	-0.201931	-0.00479397	-0.0793648	-0.0375276	0.0279396565121788	0.0569633708094229	0.445914156933136	-0.331987
13672_3_HSPA6_HSP76	BTN2A1_Q7KYR7_OID20713_v1_Inflammation	133	Inverse variance weighted	-0.145131	0.0390027	0.864909	0.801255	0.93362	0.000198394	143	Inverse variance weighted	0.0304496	0.0126534	1.03092	1.00566	1.05681	0.0161091	27	Inverse variance weighted	-0.271159	0.0357945347190926	0.762495	0.588678	0.987634	0.0399497	-0.145131	0.0304496	-0.271159	-0.00825668	-0.136874	-0.078414	0.0619006081171901	0.0568911737300578	0.540297397007345	-0.426515
8099_42_SPON2_SPON2	PSG1_P11464_OID20916_v1_Neurology	155	Inverse variance weighted	0.0677669	0.0228798	1.07012	1.02319	1.1192	0.00305781	152	Inverse variance weighted	-0.0177845	0.00509399	0.982373	0.972613	0.99223	0.000480723	36	Inverse variance weighted	-0.214675	0.0162352330147769	0.806804	0.695655	0.935712	0.00453073	0.0677669	-0.0177845	-0.214675	0.0038178836882104	0.0639490423117896	-0.0280032	0.0356389403971731	0.0563384517133092	-0.413228	0.525904633731994
5491_12_SPOCK2_Testican_2	CD302_Q8IX05_OID21328_v1_Oncology	84	Inverse variance weighted	-0.215996	0.071898	0.805739	0.699832	0.927673	0.00266285	95	Inverse variance weighted	-0.0587448	0.0248176	0.942947	0.898178	0.989949	0.0179302	47	Inverse variance weighted	0.205713	0.0193853179514691	1.2284	1.02177	1.47682	0.0285836	-0.215996	-0.0587448	0.205713	-0.0120846	-0.203911	-0.0500798	0.0259106636322054	0.0559481987404213	0.231855668819785	-0.119959
12560_9_NT5C_NT5C	SLMAP_Q14BN4_OID31441_v1_Oncology_II	4	Inverse variance weighted	-1.26651	0.364859	0.281812	0.137843	0.576148	0.00051806	4	Inverse variance weighted	0.381554	0.0924407	1.46456	1.22186	1.75547	3.67e-05	36	Inverse variance weighted	-0.185497	0.0368494972843158	0.830692	0.742131	0.92982	0.00125934	-1.26651	0.381554	-0.185497	-0.070777	-1.19574	-0.143002	0.00144797220530164	0.0558833092836414	0.112909891523553	-0.00114327
9294_45_MFAP2_MFAP2	PECR_Q9BY49_OID30228_v1_Cardiometabolic_II	19	Inverse variance weighted	0.296853	0.114612	1.34562	1.07488	1.68454	0.00959588	17	Inverse variance weighted	0.0634353	0.0214971	1.06549	1.02153	1.11134	0.00316865	29	Inverse variance weighted	0.261103	0.027087462224728	1.29836	1.05974	1.59071	0.0117343	0.296853	0.0634353	0.261103	0.0165631533729251	0.280289753627075	-0.0365283	0.069654579333392	0.055795826762529	-0.123052	0.234643413255818
5005_4_MAPK12_MK12	LIPF_P07098_OID30266_v1_Cardiometabolic_II	57	Inverse variance weighted	-0.146122	0.0619149	0.864052	0.765309	0.975535	0.0182726	61	Inverse variance weighted	0.0313128	0.0146262	1.03181	1.00265	1.06182	0.032284	23	Inverse variance weighted	-0.257155	0.029454753667345	0.773248	0.617777	0.967846	0.0247444	-0.146122	0.0313128	-0.257155	-0.00805225	-0.13807	-0.0657836	0.0496790649074359	0.0551062938193475	0.450195619972244	-0.339983
8099_42_SPON2_SPON2	ADAM23_O75077_OID20651_v1_Inflammation	108	Inverse variance weighted	-0.0661019	0.0288822	0.936035	0.884519	0.990552	0.0220985	104	Inverse variance weighted	0.0169059	0.00628123	1.01705	1.00461	1.02965	0.00711337	36	Inverse variance weighted	-0.214675	0.0162353275287528	0.806804	0.695655	0.935712	0.00453073	-0.0661019	0.0169059	-0.214675	-0.00362926	-0.0624727	-0.0354505	0.0281919835361074	0.0549039755673083	0.536300582969469	-0.426493
9294_45_MFAP2_MFAP2	CES1_P23141_OID20244_v1_Cardiometabolic	56	Inverse variance weighted	-0.134492	0.0621073	0.87416	0.77397	0.987319	0.0303509	57	Inverse variance weighted	-0.02821	0.0135242	0.972184	0.946753	0.998299	0.0369881	29	Inverse variance weighted	0.261103	0.0270558046156179	1.29836	1.05974	1.59071	0.0117343	-0.134492	-0.02821	0.261103	-0.00736573	-0.127126	-0.0603951	0.0456636510433364	0.0547669475472511	0.449060342371331	-0.339526
11327_56_CLK2_CLK2	ITIH4_Q14624_OID30762_v1_Inflammation_II	43	Inverse variance weighted	-0.161842	0.0737425	0.850576	0.736109	0.982842	0.0281859	43	Inverse variance weighted	0.0686004	0.0220562	1.07101	1.02569	1.11832	0.00186924	73	Inverse variance weighted	-0.129043	0.00841815721246648	0.878936	0.775055	0.996741	0.0443391	-0.161842	0.0686004	-0.129043	-0.00885241	-0.152989	-0.025352	0.00764717449538748	0.0546979266552306	0.156646762116728	-0.0472509
15585_304_FBLN5_fibulin_5	SH3BP1_Q9Y3L3_OID31439_v1_Oncology_II	25	Inverse variance weighted	0.37837	0.0910608	1.4599	1.22127	1.74516	3.25e-05	23	Inverse variance weighted	-0.0457344	0.0205104	0.955296	0.917654	0.994481	0.02576	14	Inverse variance weighted	-0.452193	0.0788693903424756	0.636231	0.452023	0.895509	0.00951967	0.37837	-0.0457344	-0.452193	0.0206807723583961	0.357688973641604	-0.133903	0.175264777429648	0.0546575739128892	-0.353895	0.463210336668007
2516_57_CCL21_6Ckine	PKD1_P98161_OID30328_v1_Cardiometabolic_II	61	Inverse variance weighted	-0.161238	0.0676922	0.851089	0.74534	0.971843	0.0172221	55	Inverse variance weighted	0.0670662	0.0214101	1.06937	1.02542	1.1152	0.00173346	107	Inverse variance weighted	-0.130167	0.00590463218709989	0.877948	0.805407	0.957024	0.00309297	-0.161238	0.0670662	-0.130167	-0.00872984	-0.152508	-0.0203029	0.00284323761344696	0.0541425151722041	0.125918802514912	-0.0176338
9294_45_MFAP2_MFAP2	ITGBL1_O95965_OID30408_v1_Cardiometabolic_II	76	Inverse variance weighted	-0.111669	0.0486193	0.894341	0.81305	0.983759	0.0216305	80	Inverse variance weighted	-0.0230008	0.00965477	0.977262	0.958943	0.995931	0.0172037	29	Inverse variance weighted	0.261103	0.0270540259766086	1.29836	1.05974	1.59071	0.0117343	-0.111669	-0.0230008	0.261103	-0.00600558	-0.105663	-0.0590315	0.0470203139692551	0.0537803819211408	0.528631123363179	-0.42107
9294_45_MFAP2_MFAP2	FLT3LG_P49771_OID20661_v1_Inflammation	86	Inverse variance weighted	-0.161176	0.0798605	0.851142	0.727819	0.995362	0.0435687	88	Inverse variance weighted	-0.0331709	0.0141143	0.967373	0.940978	0.994508	0.0187656	29	Inverse variance weighted	0.261103	0.0270571655074281	1.29836	1.05974	1.59071	0.0117343	-0.161176	-0.0331709	0.261103	-0.00866102	-0.152515	-0.0616931	0.0443710223611247	0.0537365010011207	0.382768859503235	-0.275296
8363_18_KIAA1324L_K132L	OGN_P20774_OID21123_v1_Neurology	87	Inverse variance weighted	-0.147658	0.0452421	0.862726	0.789518	0.942722	0.00109951	82	Inverse variance weighted	0.0193419	0.00902322	1.01953	1.00166	1.03772	0.0320672	14	Inverse variance weighted	-0.409961	0.0697634986234568	0.663676	0.475449	0.926422	0.0159914	-0.147658	0.0193419	-0.409961	-0.00792943	-0.139729	-0.144666	0.128807029014212	0.0537011469825123	0.979733179174907	-0.872331
9343_16_IL2RB_IL_2_sRb	PECR_Q9BY49_OID30228_v1_Cardiometabolic_II	19	Inverse variance weighted	0.296853	0.114612	1.34562	1.07488	1.68454	0.00959588	17	Inverse variance weighted	0.0622078	0.0214793	1.06418	1.02031	1.10994	0.00377733	36	Inverse variance weighted	0.25498	0.0257742764705055	1.29044	1.05879	1.57277	0.0115414	0.296853	0.0622078	0.25498	0.0158617596212645	0.280991147378736	-0.0346558	0.0663793415034553	0.0534330614497383	-0.116744	0.223610212122515
9343_16_IL2RB_IL_2_sRb	PKN3_Q6P5Z2_OID31311_v1_Oncology_II	7	Inverse variance weighted	-0.511181	0.186426	0.599787	0.416205	0.864343	0.00610655	7	Inverse variance weighted	-0.106318	0.0392223	0.899139	0.832607	0.970987	0.00671515	36	Inverse variance weighted	0.25498	0.0260752214018326	1.29044	1.05879	1.57277	0.0115414	-0.511181	-0.106318	0.25498	-0.027109	-0.484072	-0.0782164	0.023998471472511	0.053031996607827	0.153011081614671	-0.0469471
9343_16_IL2RB_IL_2_sRb	CASP4_P49662_OID31276_v1_Oncology_II	7	Inverse variance weighted	-0.496491	0.205301	0.608663	0.407025	0.91019	0.0155906	7	Inverse variance weighted	-0.101505	0.0432905	0.903477	0.82998	0.983483	0.019041	36	Inverse variance weighted	0.25498	0.0261120049785366	1.29044	1.05879	1.57277	0.0115414	-0.496491	-0.101505	0.25498	-0.0258816	-0.470609	-0.0770612	0.0252979068642512	0.0521291213234468	0.155211680210417	-0.0509534
8099_42_SPON2_SPON2	ALDH5A1_P51649_OID31047_v1_Neurology_II	11	Inverse variance weighted	0.446237	0.160841	1.56242	1.13995	2.14146	0.0055305	13	Inverse variance weighted	-0.108198	0.0378833	0.89745	0.833227	0.966623	0.00428913	36	Inverse variance weighted	-0.214675	0.0167444145061765	0.806804	0.695655	0.935712	0.00453073	0.446237	-0.108198	-0.214675	0.0232272648379881	0.423009868162012	-0.00959179	0.056046317270094	0.0520513940241456	-0.0214948	0.125597609713251
17231_1_LCP1_L_plastin	DDR1_Q08345_OID21009_v1_Neurology	115	Inverse variance weighted	0.179072	0.0459826	1.19611	1.09302	1.30891	9.85e-05	140	Inverse variance weighted	0.0339268	0.0121522	1.03451	1.01016	1.05945	0.00524134	19	Inverse variance weighted	0.274412	0.0275862013296221	1.31576	1.08047	1.60228	0.00633356	0.179072	0.0339268	0.274412	0.00930990921613285	0.169762446783867	-0.044759	0.0633788638221922	0.051989650575284	-0.249949	0.353928798603578
3327_27_NTN4_NET4	C1RL_Q9NZP8_OID30721_v1_Inflammation_II	56	Inverse variance weighted	-0.112481	0.057157	0.893614	0.798908	0.999547	0.0490756	51	Inverse variance weighted	0.0287097	0.0130621	1.02913	1.00311	1.05581	0.0279535	29	Inverse variance weighted	-0.201931	0.0167036222669867	0.817151	0.694877	0.960941	0.0146152	-0.112481	0.0287097	-0.201931	-0.00579739	-0.106684	-0.0385365	0.0269417066737363	0.0515409698225501	0.342603686390692	-0.239522
15447_45_SORD_Sorbitol_dehydrogenase	TYRO3_Q06418_OID20161_v1_Cardiometabolic	154	Inverse variance weighted	0.091315	0.0317043	1.09561	1.0296	1.16586	0.00397413	146	Inverse variance weighted	-0.0213765	0.010528	0.97885	0.958859	0.999259	0.0423116	46	Inverse variance weighted	-0.219927	0.0192643732022139	0.802577	0.675974	0.952892	0.0120419	0.091315	-0.0213765	-0.219927	0.00470126008290453	0.0866137149170955	-0.0330569	0.0424594315592437	0.05148399901445	-0.36201	0.464977749369627
9369_174_LRRC4C_NGL1	LTB_Q06643_OID31383_v1_Oncology_II	65	Inverse variance weighted	0.203691	0.0727948	1.22592	1.06291	1.41392	0.00513951	77	Inverse variance weighted	-0.0348667	0.0177007	0.965734	0.932804	0.999827	0.0488628	20	Inverse variance weighted	-0.300066	0.0380077430156529	0.740769	0.577934	0.949484	0.017822	0.203691	-0.0348667	-0.300066	0.0104623036836253	0.193229113316375	-0.0640329	0.084957479994305	0.0513634979701934	-0.314362	0.417089150075995
13111_79_BCL6_BCL6	LY75_O60449_OID20580_v1_Inflammation	173	Inverse variance weighted	0.115247	0.0206121	1.12215	1.07772	1.16841	2.25e-08	173	Inverse variance weighted	-0.0193535	0.00543151	0.980833	0.970446	0.99133	0.000366378	23	Inverse variance weighted	-0.303377	0.0422363060685172	0.73832	0.562003	0.969954	0.0293226	0.115247	-0.0193535	-0.303377	0.00587141373727744	0.109375599262723	-0.0769117	0.0886545736315711	0.0509463419869931	-0.667364	0.769257018674932
19553_14_STX1A_STX1a	KDM3A_Q9Y4C1_OID30426_v1_Inflammation_II	15	Inverse variance weighted	-0.482031	0.205717	0.617528	0.412617	0.9242	0.0191202	18	Inverse variance weighted	0.106966	0.037231	1.1129	1.03458	1.19714	0.00406547	40	Inverse variance weighted	-0.22952	0.022870189950757	0.794915	0.655841	0.963481	0.0193275	-0.482031	0.106966	-0.22952	-0.0245509	-0.45748	-0.0693764	0.0202747117016796	0.0509321387412617	0.143925305243528	-0.042061
11327_56_CLK2_CLK2	BTN2A1_Q7KYR7_OID20713_v1_Inflammation	133	Inverse variance weighted	-0.145131	0.0390027	0.864909	0.801255	0.93362	0.000198394	143	Inverse variance weighted	0.0572786	0.0161379	1.05895	1.02598	1.09298	0.000386221	73	Inverse variance weighted	-0.129043	0.00833249358746642	0.878936	0.775055	0.996741	0.0443391	-0.145131	0.0572786	-0.129043	-0.00739142	-0.13774	-0.0237231	0.00894026783176292	0.0509292524365795	0.163459818547021	-0.0616013
19277_4_TSTD1_KAT	IL15_P40933_OID20562_v1_Inflammation	87	Inverse variance weighted	-0.176418	0.067878	0.838268	0.733844	0.95755	0.00934837	87	Inverse variance weighted	-0.0508494	0.0169855	0.950422	0.919302	0.982595	0.00275616	27	Inverse variance weighted	0.176346	0.0129925603281903	1.19285	1.03279	1.37772	0.0164478	-0.176418	-0.0508494	0.176346	-0.00896709	-0.167451	-0.0344325	0.0164983268933816	0.0508286634388591	0.19517571229932	-0.0935184
12716_3_ZNF175_ZN175	PSG1_P11464_OID20916_v1_Neurology	155	Inverse variance weighted	0.0677669	0.0228798	1.07012	1.02319	1.1192	0.00305781	152	Inverse variance weighted	-0.0108383	0.00464235	0.98922	0.98026	0.998262	0.0195612	20	Inverse variance weighted	-0.317788	0.0432581823910086	0.727757	0.557335	0.95029	0.0195657	0.0677669	-0.0108383	-0.317788	0.00344428745559047	0.0643226385444095	-0.0813418	0.0882303249419672	0.0508254934802631	-1.20032	1.30196734823072
5708_1_LEAP2_LEAP2	LRRN1_Q6UXK5_OID20438_v1_Inflammation	103	Inverse variance weighted	0.0783139	0.0390483	1.08146	1.00178	1.16748	0.0449023	102	Inverse variance weighted	-0.0163943	0.00672376	0.983739	0.97086	0.996789	0.0147579	50	Inverse variance weighted	-0.241684	0.0184009885040939	0.785305	0.676442	0.911687	0.0015015	0.0783139	-0.0163943	-0.241684	0.0039622398985973	0.0743516941014027	-0.0321037	0.0400281773666214	0.0505943156756409	-0.409936	0.511124589483927
9092_33_ANGPTL1_ANGL1	CASP4_P49662_OID31276_v1_Oncology_II	7	Inverse variance weighted	-0.496491	0.205301	0.608663	0.407025	0.91019	0.0155906	7	Inverse variance weighted	0.0850332	0.0423034	1.08875	1.00212	1.18287	0.0444226	27	Inverse variance weighted	-0.294243	0.0369109323016089	0.745095	0.583365	0.951663	0.0184313	-0.496491	0.0850332	-0.294243	-0.0250204	-0.47147	-0.0973658	0.0473250059270862	0.0503945439299429	0.196108109612895	-0.095319
5708_1_LEAP2_LEAP2	CRELD2_Q6UXH1_OID20751_v1_Inflammation	73	Inverse variance weighted	-0.154382	0.0591511	0.856944	0.763136	0.962283	0.00905502	71	Inverse variance weighted	0.0315215	0.0133668	1.03202	1.00534	1.05942	0.0183643	50	Inverse variance weighted	-0.241684	0.0184054816727845	0.785305	0.676442	0.911687	0.0015015	-0.154382	0.0315215	-0.241684	-0.00761822	-0.146764	-0.043693	0.0284565217736051	0.0493464168107659	0.283017644344585	-0.184325
9095_5_MTFR1_MTFR1	RTN4R_Q9BZR6_OID21424_v1_Oncology	65	Inverse variance weighted	0.166198	0.0544379	1.18081	1.06131	1.31376	0.00226572	63	Inverse variance weighted	-0.0274376	0.0124783	0.972935	0.949428	0.997024	0.0278904	8	Inverse variance weighted	-0.297139	0.0370386505294089	0.742941	0.581907	0.948538	0.0171316	0.166198	-0.0274376	-0.297139	0.00815279475028188	0.158045529249718	-0.064443	0.0807485497879234	0.0490546147161019	-0.387747	0.485856582933552
19277_4_TSTD1_KAT	ICAM3_P32942_OID20277_v1_Cardiometabolic	168	Inverse variance weighted	0.171889	0.0444226	1.18755	1.08852	1.29558	0.000109099	181	Inverse variance weighted	0.047694	0.0104048	1.04885	1.02768	1.07046	4.56e-06	27	Inverse variance weighted	0.176346	0.0129733150596229	1.19285	1.03279	1.37772	0.0164478	0.171889	0.047694	0.176346	0.00841064630278059	0.163478580697219	-0.0170171	0.0338383438196415	0.0489306191526511	-0.0990001	0.19686134151759
5005_4_MAPK12_MK12	MME_P08473_OID21307_v1_Oncology	89	Inverse variance weighted	-0.142375	0.0482966	0.867296	0.788962	0.953406	0.00319901	84	Inverse variance weighted	0.0270836	0.0126655	1.02745	1.00226	1.05328	0.0324865	23	Inverse variance weighted	-0.257155	0.0294531904928867	0.773248	0.617777	0.967846	0.0247444	-0.142375	0.0270836	-0.257155	-0.00696469	-0.135411	-0.0646929	0.0507635655759284	0.0489177668059442	0.454382781372348	-0.356547
16773_29_SCUBE3_SCUB3	NT5C_Q8TCD5_OID30294_v1_Cardiometabolic_II	35	Inverse variance weighted	-0.189963	0.0722144	0.826989	0.717844	0.952731	0.00852475	29	Inverse variance weighted	0.034014	0.0125042	1.0346	1.00955	1.06027	0.00652391	22	Inverse variance weighted	-0.272963	0.0371150234802861	0.761121	0.58307	0.993544	0.0446815	-0.189963	0.034014	-0.272963	-0.00928456	-0.180679	-0.08203	0.0634608848463565	0.0488755207568546	0.431820012151417	-0.334069
9294_45_MFAP2_MFAP2	DDR1_Q08345_OID21009_v1_Neurology	115	Inverse variance weighted	0.179072	0.0459826	1.19611	1.09302	1.30891	9.85e-05	140	Inverse variance weighted	0.0332412	0.0114548	1.0338	1.01085	1.05727	0.00370849	29	Inverse variance weighted	0.261103	0.0270557940788714	1.29836	1.05974	1.59071	0.0117343	0.179072	0.0332412	0.261103	0.00867936582582348	0.170392990174177	-0.04435	0.0617087222204113	0.0484684851402942	-0.247665	0.344602168636299
6986_17_HS3ST3B1_HS3SB	PSG1_P11464_OID20916_v1_Neurology	155	Inverse variance weighted	0.0677669	0.0228798	1.07012	1.02319	1.1192	0.00305781	152	Inverse variance weighted	-0.00985786	0.00463551	0.990191	0.981235	0.999228	0.0334535	24	Inverse variance weighted	-0.332991	0.048924491619485	0.716777	0.537427	0.95598	0.0234265	0.0677669	-0.00985786	-0.332991	0.00328257461536072	0.0644843513846393	-0.0926094	0.0991745781895513	0.0484391842616665	-1.36659	1.46346579435448
9321_400_NMB_NMB	PKN3_Q6P5Z2_OID31311_v1_Oncology_II	7	Inverse variance weighted	-0.511181	0.186426	0.599787	0.416205	0.864343	0.00610655	7	Inverse variance weighted	-0.0805279	0.0353823	0.922629	0.860814	0.988884	0.0228497	24	Inverse variance weighted	0.304277	0.0377430980075201	1.35564	1.0638	1.72755	0.0138925	-0.511181	-0.0805279	0.304277	-0.0245028	-0.486678	-0.0984792	0.0494737024906029	0.0479336232702895	0.192650339035176	-0.0967831
9177_6_FAM3B_FAM3B	TSC1_Q92574_OID30478_v1_Inflammation_II	7	Inverse variance weighted	-0.535904	0.247104	0.58514	0.360513	0.949728	0.0301026	8	Inverse variance weighted	0.225812	0.046152	1.25334	1.14494	1.372	9.94e-07	89	Inverse variance weighted	-0.113441	0.012037262636479	0.892757	0.804515	0.990679	0.0326493	-0.535904	0.225812	-0.113441	-0.0256163	-0.510288	-0.0492093	-0.00202323	0.0478000877159077	0.0918248198635546	0.00377535556826085
2516_57_CCL21_6Ckine	ITIH4_Q14624_OID30762_v1_Inflammation_II	43	Inverse variance weighted	-0.161842	0.0737425	0.850576	0.736109	0.982842	0.0281859	43	Inverse variance weighted	0.0590899	0.0168105	1.06087	1.02649	1.09641	0.000439657	107	Inverse variance weighted	-0.130167	0.00581288228299707	0.877948	0.805407	0.957024	0.00309297	-0.161842	0.0590899	-0.130167	-0.00769158	-0.15415	-0.0190848	0.00370166633243377	0.0475253028944027	0.117922726519221	-0.0228721
13645_14_DHX38_PRP16	BTN2A1_Q7KYR7_OID20713_v1_Inflammation	133	Inverse variance weighted	-0.145131	0.0390027	0.864909	0.801255	0.93362	0.000198394	143	Inverse variance weighted	0.0270289	0.012513	1.0274	1.00251	1.05291	0.0307669	26	Inverse variance weighted	-0.252427	0.0307248698955756	0.776913	0.612027	0.986222	0.0380804	-0.145131	0.0270289	-0.252427	-0.00682282	-0.138308	-0.0670436	0.0533979231912607	0.0470114312012014	0.461951684887024	-0.367929
3327_27_NTN4_NET4	PSG1_P11464_OID20916_v1_Neurology	155	Inverse variance weighted	0.0677669	0.0228798	1.07012	1.02319	1.1192	0.00305781	152	Inverse variance weighted	-0.0157462	0.00564698	0.984377	0.973542	0.995333	0.00529634	29	Inverse variance weighted	-0.201931	0.0166996488189099	0.817151	0.694877	0.960941	0.0146152	0.0677669	-0.0157462	-0.201931	0.00317965710996543	0.0645872688900346	-0.0295517	0.0359109687950288	0.0469204861080083	-0.436078	0.529918810173399
15447_45_SORD_Sorbitol_dehydrogenase	CRELD2_Q6UXH1_OID20751_v1_Inflammation	73	Inverse variance weighted	-0.154382	0.0591511	0.856944	0.763136	0.962283	0.00905502	71	Inverse variance weighted	0.0324253	0.0132476	1.03296	1.00648	1.06013	0.01438	46	Inverse variance weighted	-0.219927	0.0192678474977511	0.802577	0.675974	0.952892	0.0120419	-0.154382	0.0324253	-0.219927	-0.00713119	-0.147251	-0.0448962	0.0306337861632042	0.0461917365234992	0.290811337182543	-0.198428
5005_4_MAPK12_MK12	KDM3A_Q9Y4C1_OID30426_v1_Inflammation_II	15	Inverse variance weighted	-0.482031	0.205717	0.617528	0.412617	0.9242	0.0191202	18	Inverse variance weighted	0.0865134	0.0335079	1.09037	1.02106	1.16438	0.00982642	23	Inverse variance weighted	-0.257155	0.0295935180091578	0.773248	0.617777	0.967846	0.0247444	-0.482031	0.0865134	-0.257155	-0.0222474	-0.459783	-0.0802507	0.0357559142240821	0.0461534411303146	0.166484533855774	-0.0741777
19277_4_TSTD1_KAT	IFIT3_O14879_OID31283_v1_Oncology_II	17	Inverse variance weighted	0.332106	0.140452	1.3939	1.05847	1.83564	0.0180515	17	Inverse variance weighted	0.0866456	0.0441896	1.09051	1.00003	1.18917	0.0499061	27	Inverse variance weighted	0.176346	0.0135174204418876	1.19285	1.03279	1.37772	0.0164478	0.332106	0.0866456	0.176346	0.015279615092642	0.316826860907358	-0.0112145	0.0417737591587416	0.0460081817032739	-0.0337679	0.12578423541112
15447_45_SORD_Sorbitol_dehydrogenase	TSC1_Q92574_OID30478_v1_Inflammation_II	7	Inverse variance weighted	-0.535904	0.247104	0.58514	0.360513	0.949728	0.0301026	8	Inverse variance weighted	0.111922	0.0407472	1.11843	1.03258	1.21141	0.00601921	46	Inverse variance weighted	-0.219927	0.0197955442640712	0.802577	0.675974	0.952892	0.0120419	-0.535904	0.111922	-0.219927	-0.0246146	-0.511289	-0.0634139	0.0141846537420822	0.0459310027558666	0.118330647115337	-0.0264686
16773_29_SCUBE3_SCUB3	CASP4_P49662_OID31276_v1_Oncology_II	7	Inverse variance weighted	-0.496491	0.205301	0.608663	0.407025	0.91019	0.0155906	7	Inverse variance weighted	0.0833331	0.0420713	1.0869	1.00087	1.18033	0.0476183	22	Inverse variance weighted	-0.272963	0.0372778166344003	0.761121	0.58307	0.993544	0.0446815	-0.496491	0.0833331	-0.272963	-0.0227468	-0.473744	-0.0958114	0.050317684239575	0.0458152333571487	0.192977151086248	-0.101347
8815_1_OLFML1_OLFL1	LY75_O60449_OID20580_v1_Inflammation	173	Inverse variance weighted	0.115247	0.0206121	1.12215	1.07772	1.16841	2.25e-08	173	Inverse variance weighted	-0.0105698	0.00520073	0.989486	0.979451	0.999624	0.0421166	9	Inverse variance weighted	-0.49815	0.109647665492502	0.607654	0.394725	0.935444	0.0236242	0.115247	-0.0105698	-0.49815	0.00526533863987386	0.109981674360126	-0.209644	0.220174763005177	0.0456874195938931	-1.81908	1.91045960562272
12560_9_NT5C_NT5C	PI16_Q6UXB8_OID30676_v1_Inflammation_II	76	Inverse variance weighted	-0.111142	0.055674	0.894812	0.802308	0.997981	0.0459018	76	Inverse variance weighted	0.0272262	0.0124619	1.0276	1.0028	1.05301	0.0289061	36	Inverse variance weighted	-0.185497	0.0106745571191314	0.830692	0.742131	0.92982	0.00125934	-0.111142	0.0272262	-0.185497	-0.00505037	-0.106091	-0.0259725	0.0158717589088365	0.0454408180990774	0.23368805923086	-0.142806
14254_27_PTPN4_PTN4	TSC1_Q92574_OID30478_v1_Inflammation_II	7	Inverse variance weighted	-0.535904	0.247104	0.58514	0.360513	0.949728	0.0301026	8	Inverse variance weighted	0.191149	0.0556019	1.21064	1.08564	1.35003	0.000586426	53	Inverse variance weighted	-0.126746	0.012716939839882	0.880957	0.790785	0.981412	0.021416	-0.535904	0.191149	-0.126746	-0.0242274	-0.511677	-0.0491526	0.000697762017983682	0.0452085359147752	0.0917190995783015	-0.00130203
13430_50_SLC14A1_UT1	LY75_O60449_OID20580_v1_Inflammation	173	Inverse variance weighted	0.115247	0.0206121	1.12215	1.07772	1.16841	2.25e-08	173	Inverse variance weighted	-0.0118756	0.00534602	0.988195	0.977894	0.998604	0.0263252	10	Inverse variance weighted	-0.434122	0.094103768886103	0.647833	0.423591	0.990786	0.045209	0.115247	-0.0118756	-0.434122	0.00515544021550787	0.110091572784492	-0.179288	0.18959882723227	0.0447338293748913	-1.55568	1.64515176833494
8363_18_KIAA1324L_K132L	LY75_O60449_OID20580_v1_Inflammation	173	Inverse variance weighted	0.115247	0.0206121	1.12215	1.07772	1.16841	2.25e-08	173	Inverse variance weighted	-0.0125638	0.0054196	0.987515	0.977081	0.998061	0.0204378	14	Inverse variance weighted	-0.409961	0.0697633135465075	0.663676	0.475449	0.926422	0.0159914	0.115247	-0.0125638	-0.409961	0.00515064749435638	0.110096365505644	-0.131585	0.141886742045511	0.0446922428640852	-1.14177	1.23115331453763
9321_400_NMB_NMB	LGALS1_P09382_OID20154_v1_Cardiometabolic	30	Inverse variance weighted	0.262312	0.0831253	1.29993	1.10449	1.52995	0.00160155	26	Inverse variance weighted	0.0384983	0.0186271	1.03925	1.00199	1.07789	0.038754	24	Inverse variance weighted	0.304277	0.0376422289100875	1.35564	1.0638	1.72755	0.0138925	0.262312	0.0384983	0.304277	0.0117141312819835	0.250598027718016	-0.0620646	0.0854928999457551	0.0446572180513505	-0.236606	0.325920461604508
5491_12_SPOCK2_Testican_2	MIA_Q16674_OID21531_v1_Oncology	92	Inverse variance weighted	-0.109323	0.0345502	0.896441	0.837745	0.95925	0.0015553	85	Inverse variance weighted	-0.0232287	0.00950676	0.977039	0.959002	0.995415	0.01455	47	Inverse variance weighted	0.205713	0.0193316793305596	1.2284	1.02177	1.47682	0.0285836	-0.109323	-0.0232287	0.205713	-0.00477845	-0.104544	-0.0426685	0.0331116418406468	0.0437096615281512	0.390299705677677	-0.30288
12560_9_NT5C_NT5C	FST_P19883_OID20770_v1_Inflammation	20	Inverse variance weighted	-0.317046	0.135903	0.728297	0.557989	0.950586	0.019654	19	Inverse variance weighted	0.0742531	0.0324992	1.07708	1.01061	1.14792	0.0223267	36	Inverse variance weighted	-0.185497	0.0109386667327285	0.830692	0.742131	0.92982	0.00125934	-0.317046	0.0742531	-0.185497	-0.0137737	-0.303272	-0.0352135	0.00766609410167588	0.0434438251867643	0.111067400815627	-0.0241798
19277_4_TSTD1_KAT	MTHFD2_P13995_OID31078_v1_Neurology_II	8	Inverse variance weighted	-0.464705	0.22855	0.628321	0.401454	0.983393	0.0420248	8	Inverse variance weighted	-0.114424	0.0515837	0.891879	0.806115	0.986768	0.0265396	27	Inverse variance weighted	0.176346	0.0142442743642983	1.19285	1.03279	1.37772	0.0164478	-0.464705	-0.114424	0.176346	-0.0201783	-0.444527	-0.0480971	0.00774050379497935	0.0434217053801098	0.103500230662724	-0.0166568
19553_14_STX1A_STX1a	OGN_P20774_OID21123_v1_Neurology	87	Inverse variance weighted	-0.147658	0.0452421	0.862726	0.789518	0.942722	0.00109951	82	Inverse variance weighted	0.0279013	0.00997217	1.02829	1.00839	1.04859	0.00514337	40	Inverse variance weighted	-0.22952	0.022522502497195	0.794915	0.655841	0.963481	0.0193275	-0.147658	0.0279013	-0.22952	-0.00640391	-0.141255	-0.050548	0.0377401955081221	0.0433697445440532	0.342330650591892	-0.255591
11308_8_CREB3L4_CR3L4	BTN2A1_Q7KYR7_OID20713_v1_Inflammation	133	Inverse variance weighted	-0.145131	0.0390027	0.864909	0.801255	0.93362	0.000198394	143	Inverse variance weighted	0.0762226	0.036398	1.0792	1.00489	1.15901	0.0362474	110	Inverse variance weighted	-0.0823278	0.00437656748030985	0.92097	0.849666	0.998258	0.0452412	-0.145131	0.0762226	-0.0823278	-0.00627524	-0.138856	-0.0148533	0.00230283052450796	0.0432384288578773	0.102344098848506	-0.0158672
17224_12_OGN_MIME	TSC1_Q92574_OID30478_v1_Inflammation_II	7	Inverse variance weighted	-0.535904	0.247104	0.58514	0.360513	0.949728	0.0301026	8	Inverse variance weighted	0.134023	0.038517	1.14342	1.06028	1.23308	0.000502199	85	Inverse variance weighted	-0.172159	0.0117021208346948	0.841845	0.746976	0.948763	0.00476939	-0.535904	0.134023	-0.172159	-0.0230733	-0.512831	-0.0460095	-0.000137142	0.0430549017749637	0.0858538961032563	0.000255907446671119
11308_8_CREB3L4_CR3L4	CES1_P23141_OID20244_v1_Cardiometabolic	56	Inverse variance weighted	-0.134492	0.0621073	0.87416	0.77397	0.987319	0.0303509	57	Inverse variance weighted	0.0702894	0.0353721	1.07282	1.00096	1.14984	0.0469065	110	Inverse variance weighted	-0.0823278	0.00419986801896151	0.92097	0.849666	0.998258	0.0452412	-0.134492	0.0702894	-0.0823278	-0.00578677	-0.128705	-0.0140185	0.00244497226419853	0.0430268078192088	0.104232905458364	-0.0181793
4931_59_F3_TF	ENTPD6_O75354_OID20100_v1_Cardiometabolic	105	Inverse variance weighted	-0.148172	0.0388169	0.862283	0.799113	0.930447	0.000134981	111	Inverse variance weighted	0.0182281	0.00767156	1.0184	1.0032	1.03382	0.0174985	13	Inverse variance weighted	-0.347664	0.0593338872866827	0.706336	0.505521	0.986923	0.0416369	-0.148172	0.0182281	-0.347664	-0.00633726	-0.141834	-0.122632	0.109957154399231	0.0427697612469641	0.82763275617465	-0.742093
2997_8_JAM2_JAM_B	LY75_O60449_OID20580_v1_Inflammation	173	Inverse variance weighted	0.115247	0.0206121	1.12215	1.07772	1.16841	2.25e-08	173	Inverse variance weighted	-0.0115001	0.00581488	0.988566	0.977363	0.999897	0.0479631	11	Inverse variance weighted	-0.428011	0.086437375382915	0.651804	0.438746	0.968326	0.0340587	0.115247	-0.0115001	-0.428011	0.00492215131418122	0.110324861685819	-0.164495	0.174339407064695	0.0427095782012261	-1.42733	1.51274555866098
3327_27_NTN4_NET4	TMPRSS5_Q9H3S3_OID20947_v1_Neurology	131	Inverse variance weighted	-0.109767	0.0340903	0.896043	0.838128	0.957959	0.00128243	126	Inverse variance weighted	0.0228492	0.00710909	1.02311	1.00896	1.03747	0.0013086	29	Inverse variance weighted	-0.201931	0.0167002020929038	0.817151	0.694877	0.960941	0.0146152	-0.109767	0.0228492	-0.201931	-0.00461397	-0.105153	-0.0373464	0.0281184250332236	0.0420342774542796	0.340233507350253	-0.256165
11441_11_PYGL_PYGL	TCN2_P20062_OID20341_v1_Cardiometabolic	127	Inverse variance weighted	0.158633	0.0418706	1.17191	1.07957	1.27214	0.000151476	124	Inverse variance weighted	-0.0152858	0.00658612	0.98483	0.972199	0.997626	0.0202918	26	Inverse variance weighted	-0.433585	0.0777609813406821	0.648181	0.456074	0.921207	0.0156227	0.158633	-0.0152858	-0.433585	0.00662768563853816	0.152004929361462	-0.145784	0.159039209066275	0.0417800944562262	-0.919003	1.00256311771873
11441_11_PYGL_PYGL	LY75_O60449_OID20580_v1_Inflammation	173	Inverse variance weighted	0.115247	0.0206121	1.12215	1.07772	1.16841	2.25e-08	173	Inverse variance weighted	-0.0110623	0.00458284	0.988999	0.980155	0.997922	0.015785	26	Inverse variance weighted	-0.433585	0.0777609326972817	0.648181	0.456074	0.921207	0.0156227	0.115247	-0.0110623	-0.433585	0.00479643971768334	0.110450573282317	-0.147615	0.157207867804356	0.0416187768587403	-1.28086	1.36409494452022
7738_299_STX2_STX2	BTN2A1_Q7KYR7_OID20713_v1_Inflammation	133	Inverse variance weighted	-0.145131	0.0390027	0.864909	0.801255	0.93362	0.000198394	143	Inverse variance weighted	0.0304494	0.0113704	1.03092	1.0082	1.05415	0.00740731	52	Inverse variance weighted	-0.198132	0.014601571947866	0.820262	0.709968	0.94769	0.00716146	-0.145131	0.0304494	-0.198132	-0.00603298	-0.139098	-0.0346521	0.0225861002349633	0.0415691731597369	0.23876382325431	-0.155625
7738_299_STX2_STX2	LTB_Q06643_OID31383_v1_Oncology_II	65	Inverse variance weighted	0.203691	0.0727948	1.22592	1.06291	1.41392	0.00513951	77	Inverse variance weighted	-0.0426408	0.0185543	0.958256	0.924033	0.993745	0.0215525	52	Inverse variance weighted	-0.198132	0.0146188913841316	0.820262	0.709968	0.94769	0.00716146	0.203691	-0.0426408	-0.198132	0.0084484911956214	0.195242925804379	-0.0202045	0.0371015183085194	0.041476913068072	-0.0991919	0.182145712641979
3181_50_CTSS_Cathepsin_S	CEACAM6_P40199_OID30362_v1_Cardiometabolic_II	57	Inverse variance weighted	0.192627	0.0816074	1.21243	1.03322	1.42273	0.0182548	60	Inverse variance weighted	0.0655775	0.0273804	1.06778	1.01198	1.12664	0.0166181	63	Inverse variance weighted	0.121759	0.00775377845365996	1.12948	1.00034	1.2753	0.0493662	0.192627	0.0655775	0.121759	0.00798462924691127	0.184642380753089	-0.00721278	0.0231820350160848	0.0414512442824673	-0.0374443	0.120346752078459
11308_8_CREB3L4_CR3L4	ADAM23_O75077_OID20651_v1_Inflammation	108	Inverse variance weighted	-0.0661019	0.0288822	0.936035	0.884519	0.990552	0.0220985	104	Inverse variance weighted	0.0332145	0.00733924	1.03377	1.01901	1.04875	6.02e-06	110	Inverse variance weighted	-0.0823278	0.00339363011624832	0.92097	0.849666	0.998258	0.0452412	-0.0661019	0.0332145	-0.0823278	-0.00273448	-0.0633674	-0.00938599	0.0039170395482469	0.041367562608311	0.141992697632319	-0.0592576
12475_48_CLIC5_CLIC5	LTB_Q06643_OID31383_v1_Oncology_II	65	Inverse variance weighted	0.203691	0.0727948	1.22592	1.06291	1.41392	0.00513951	77	Inverse variance weighted	-0.0610095	0.0208413	0.940814	0.903157	0.980041	0.0034188	60	Inverse variance weighted	-0.137838	0.00952220133704837	0.87124	0.761834	0.996358	0.0440834	0.203691	-0.0610095	-0.137838	0.00840943012733222	0.195281986872668	-0.0102541	0.027072944747947	0.0412851471661775	-0.0503413	0.132911563710841
7738_299_STX2_STX2	PI16_Q6UXB8_OID30676_v1_Inflammation_II	76	Inverse variance weighted	-0.111142	0.055674	0.894812	0.802308	0.997981	0.0459018	76	Inverse variance weighted	0.0229954	0.0115548	1.02326	1.00035	1.0467	0.0465775	52	Inverse variance weighted	-0.198132	0.014599884733541	0.820262	0.709968	0.94769	0.00716146	-0.111142	0.0229954	-0.198132	-0.00455611	-0.106586	-0.0331719	0.0240596625748897	0.0409936913985014	0.298464609513252	-0.216477
5005_4_MAPK12_MK12	OGN_P20774_OID21123_v1_Neurology	87	Inverse variance weighted	-0.147658	0.0452421	0.862726	0.789518	0.942722	0.00109951	82	Inverse variance weighted	0.0234273	0.00921279	1.0237	1.00538	1.04236	0.0109933	23	Inverse variance weighted	-0.257155	0.029451983720425	0.773248	0.617777	0.967846	0.0247444	-0.147658	0.0234273	-0.257155	-0.00602445	-0.141634	-0.0637503	0.0517014354191086	0.0407999173127217	0.431741898074453	-0.350142
11308_8_CREB3L4_CR3L4	CRELD2_Q6UXH1_OID20751_v1_Inflammation	73	Inverse variance weighted	-0.154382	0.0591511	0.856944	0.763136	0.962283	0.00905502	71	Inverse variance weighted	0.0756233	0.0298381	1.07856	1.01729	1.14351	0.0112622	110	Inverse variance weighted	-0.0823278	0.00406803245539363	0.92097	0.849666	0.998258	0.0452412	-0.154382	0.0756233	-0.0823278	-0.0062259	-0.148157	-0.0141992	0.0017474430697316	0.0403277655740754	0.0919744518384634	-0.0113189
19277_4_TSTD1_KAT	DDR1_Q08345_OID21009_v1_Neurology	115	Inverse variance weighted	0.179072	0.0459826	1.19611	1.09302	1.30891	9.85e-05	140	Inverse variance weighted	0.0407586	0.0107344	1.0416	1.01991	1.06375	0.000146458	27	Inverse variance weighted	0.176346	0.012971201547886	1.19285	1.03279	1.37772	0.0164478	0.179072	0.0407586	0.176346	0.00718762208961966	0.17188473391038	-0.0182359	0.0326111771234762	0.0401380885926338	-0.101836	0.182111733222945
19277_4_TSTD1_KAT	CD302_Q8IX05_OID21328_v1_Oncology	84	Inverse variance weighted	-0.215996	0.071898	0.805739	0.699832	0.927673	0.00266285	95	Inverse variance weighted	-0.0490591	0.0144087	0.952125	0.925612	0.979397	0.000662082	27	Inverse variance weighted	0.176346	0.0129830783213634	1.19285	1.03279	1.37772	0.0164478	-0.215996	-0.0490591	0.176346	-0.00865137	-0.207344	-0.0340982	0.016795458944935	0.0400534931726022	0.157865358166036	-0.0777584
19277_4_TSTD1_KAT	CTBS_Q01459_OID30710_v1_Inflammation_II	101	Inverse variance weighted	0.101137	0.0392149	1.10643	1.02457	1.19482	0.00990743	97	Inverse variance weighted	0.0228827	0.0090642	1.02315	1.00513	1.04149	0.0115858	27	Inverse variance weighted	0.176346	0.0129654797780705	1.19285	1.03279	1.37772	0.0164478	0.101137	0.0228827	0.176346	0.00403527607098054	0.0971015889290195	-0.0213771	0.0294476164359987	0.0398991611118314	-0.211368	0.291166000013929
17224_12_OGN_MIME	ADAM23_O75077_OID20651_v1_Inflammation	108	Inverse variance weighted	-0.0661019	0.0288822	0.936035	0.884519	0.990552	0.0220985	104	Inverse variance weighted	0.0152346	0.00556463	1.01535	1.00434	1.02649	0.00618596	85	Inverse variance weighted	-0.172159	0.0105023284557923	0.841845	0.746976	0.948763	0.00476939	-0.0661019	0.0152346	-0.172159	-0.00262278	-0.0634791	-0.0232073	0.0179617852064069	0.0396777946576257	0.35108421867265	-0.271729
19277_4_TSTD1_KAT	CEACAM6_P40199_OID30362_v1_Cardiometabolic_II	57	Inverse variance weighted	0.192627	0.0816074	1.21243	1.03322	1.42273	0.0182548	60	Inverse variance weighted	0.0430592	0.0187028	1.044	1.00642	1.08298	0.0213192	27	Inverse variance weighted	0.176346	0.0129888104616388	1.19285	1.03279	1.37772	0.0164478	0.192627	0.0430592	0.176346	0.00759331452112214	0.185033695478878	-0.0178648	0.0330513830259342	0.0394197808558734	-0.0927427	0.171582287582277
11275_94_LRP1B_LRP1B	MME_P08473_OID21307_v1_Oncology	89	Inverse variance weighted	-0.142375	0.0482966	0.867296	0.788962	0.953406	0.00319901	84	Inverse variance weighted	0.0246405	0.0122583	1.02495	1.00061	1.04987	0.0444202	21	Inverse variance weighted	-0.227723	0.0240398987041171	0.796345	0.647513	0.979386	0.0309804	-0.142375	0.0246405	-0.227723	-0.00561121	-0.136764	-0.0527294	0.0415069935617385	0.0394113516271671	0.370354713453921	-0.291532
10851_77_EBI3_IL27B	ITGB2_P05107_OID20315_v1_Cardiometabolic	53	Inverse variance weighted	0.214538	0.0900278	1.23929	1.03882	1.47845	0.0171713	52	Inverse variance weighted	0.175263	0.0294993	1.19156	1.12462	1.26248	2.83e-09	314	Inverse variance weighted	0.0481619	0.00528594094607362	1.04934	1.00338	1.0974	0.0350521	0.214538	0.175263	0.0481619	0.00844098573111094	0.206097024268889	-0.00191946	0.0188014299854152	0.0393449427964347	-0.00894694	0.0876368247538757
9177_6_FAM3B_FAM3B	DPP6_P42658_OID21354_v1_Oncology	45	Inverse variance weighted	-0.213294	0.0793609	0.807918	0.691535	0.943889	0.00719566	46	Inverse variance weighted	0.073636	0.0368024	1.07641	1.0015	1.15693	0.0454092	89	Inverse variance weighted	-0.113441	0.00660519655768936	0.892757	0.804515	0.990679	0.0326493	-0.213294	0.073636	-0.113441	-0.00835331	-0.204941	-0.0212995	0.0045928710721867	0.0391633137693119	0.0998596438968088	-0.021533
5005_4_MAPK12_MK12	RTN4R_Q9BZR6_OID21424_v1_Oncology	65	Inverse variance weighted	0.166198	0.0544379	1.18081	1.06131	1.31376	0.00226572	63	Inverse variance weighted	-0.0252908	0.0129006	0.975026	0.950682	0.999994	0.0499447	23	Inverse variance weighted	-0.257155	0.0294530000619597	0.773248	0.617777	0.967846	0.0247444	0.166198	-0.0252908	-0.257155	0.00650367378375334	0.159694650216247	-0.0512242	0.0642315539051945	0.0391320058302955	-0.308211	0.386475340781382
9294_45_MFAP2_MFAP2	ICAM3_P32942_OID20277_v1_Cardiometabolic	168	Inverse variance weighted	0.171889	0.0444226	1.18755	1.08852	1.29558	0.000109099	181	Inverse variance weighted	0.0256782	0.0109997	1.02601	1.00413	1.04837	0.019572	29	Inverse variance weighted	0.261103	0.0270545890180723	1.29836	1.05974	1.59071	0.0117343	0.171889	0.0256782	0.261103	0.00670466590957184	0.165184561090428	-0.0463223	0.0597316603849935	0.0390057365815709	-0.269489	0.347500895940346
19277_4_TSTD1_KAT	PVR_P15151_OID21011_v1_Neurology	81	Inverse variance weighted	-0.0773995	0.0382099	0.92552	0.858738	0.997495	0.0428016	83	Inverse variance weighted	-0.0171166	0.00713427	0.983029	0.969379	0.996871	0.0164307	27	Inverse variance weighted	0.176346	0.0129643957604058	1.19285	1.03279	1.37772	0.0164478	-0.0773995	-0.0171166	0.176346	-0.00301844	-0.0743811	-0.0284287	0.0223917747124728	0.0389981893158431	0.367297602588601	-0.289301
9294_45_MFAP2_MFAP2	NT5C_Q8TCD5_OID30294_v1_Cardiometabolic_II	35	Inverse variance weighted	-0.189963	0.0722144	0.826989	0.717844	0.952731	0.00852475	29	Inverse variance weighted	-0.0283705	0.0132137	0.972028	0.947177	0.997531	0.0317895	29	Inverse variance weighted	0.261103	0.0270557118376959	1.29836	1.05974	1.59071	0.0117343	-0.189963	-0.0283705	0.261103	-0.00740763	-0.182556	-0.0604368	0.0456215668643957	0.0389950247236982	0.31814979380279	-0.24016
12560_9_NT5C_NT5C	OGN_P20774_OID21123_v1_Neurology	87	Inverse variance weighted	-0.147658	0.0452421	0.862726	0.789518	0.942722	0.00109951	82	Inverse variance weighted	0.0309966	0.0092547	1.03148	1.01294	1.05036	0.000810207	36	Inverse variance weighted	-0.185497	0.0106730194238895	0.830692	0.742131	0.92982	0.00125934	-0.147658	0.0309966	-0.185497	-0.00574977	-0.141909	-0.0266689	0.0151693501679464	0.0389396460958248	0.180611982801285	-0.102733
5618_50_FAM3B_FAM3B	ENTPD6_O75354_OID20100_v1_Cardiometabolic	105	Inverse variance weighted	-0.148172	0.0388169	0.862283	0.799113	0.930447	0.000134981	111	Inverse variance weighted	0.023707	0.0112464	1.02399	1.00167	1.04681	0.0350347	24	Inverse variance weighted	-0.24266	0.0251633876668047	0.784538	0.64025	0.961343	0.0192733	-0.148172	0.023707	-0.24266	-0.00575276	-0.142419	-0.055073	0.0435674797542504	0.0388249800411288	0.371683869115257	-0.294034
12560_9_NT5C_NT5C	ITIH4_Q14624_OID30762_v1_Inflammation_II	43	Inverse variance weighted	-0.161842	0.0737425	0.850576	0.736109	0.982842	0.0281859	43	Inverse variance weighted	0.0335611	0.0167113	1.03413	1.00081	1.06856	0.0446122	36	Inverse variance weighted	-0.185497	0.0106838945749949	0.830692	0.742131	0.92982	0.00125934	-0.161842	0.0335611	-0.185497	-0.00622547	-0.155616	-0.0271659	0.0147149624868403	0.038466384808068	0.167854632452234	-0.0909219
8099_42_SPON2_SPON2	KDM3A_Q9Y4C1_OID30426_v1_Inflammation_II	15	Inverse variance weighted	-0.482031	0.205717	0.617528	0.412617	0.9242	0.0191202	18	Inverse variance weighted	0.0856778	0.0353142	1.08946	1.0166	1.16753	0.0152597	36	Inverse variance weighted	-0.214675	0.0165145119903146	0.806804	0.695655	0.935712	0.00453073	-0.482031	0.0856778	-0.214675	-0.0183928	-0.463638	-0.0507613	0.0139756052294614	0.0381569756712967	0.105307129059864	-0.0289932
17224_12_OGN_MIME	KDM3A_Q9Y4C1_OID30426_v1_Inflammation_II	15	Inverse variance weighted	-0.482031	0.205717	0.617528	0.412617	0.9242	0.0191202	18	Inverse variance weighted	0.105994	0.0292939	1.11181	1.04978	1.17752	0.000296569	85	Inverse variance weighted	-0.172159	0.0109513721272456	0.841845	0.746976	0.948763	0.00476939	-0.482031	0.105994	-0.172159	-0.0182478	-0.463783	-0.0397125	0.00321690776060841	0.0378560474801028	0.0823857507248067	-0.00667366
19277_4_TSTD1_KAT	LRRN1_Q6UXK5_OID20438_v1_Inflammation	103	Inverse variance weighted	0.0783139	0.0390483	1.08146	1.00178	1.16748	0.0449023	102	Inverse variance weighted	0.0164917	0.0067684	1.01663	1.00323	1.0302	0.0148269	27	Inverse variance weighted	0.176346	0.012964301182785	1.19285	1.03279	1.37772	0.0164478	0.0783139	0.0164917	0.176346	0.00290825448415913	0.0754056795158409	-0.0225018	0.0283182848024177	0.0371358497219553	-0.287328	0.36159956927228
13565_2_RBL2_p130	ADAM23_O75077_OID20651_v1_Inflammation	108	Inverse variance weighted	-0.0661019	0.0288822	0.936035	0.884519	0.990552	0.0220985	104	Inverse variance weighted	0.0259179	0.005781	1.02626	1.01469	1.03795	7.35e-06	151	Inverse variance weighted	-0.0945989	0.00385635753515713	0.909738	0.839928	0.985349	0.0202156	-0.0661019	0.0259179	-0.0945989	-0.0024518	-0.0636501	-0.0100103	0.00510665935843077	0.0370912261264468	0.151436774811353	-0.0772543
11275_94_LRP1B_LRP1B	OGN_P20774_OID21123_v1_Neurology	87	Inverse variance weighted	-0.147658	0.0452421	0.862726	0.789518	0.942722	0.00109951	82	Inverse variance weighted	0.0236102	0.00892339	1.02389	1.00614	1.04196	0.00814783	21	Inverse variance weighted	-0.227723	0.0240389243149315	0.796345	0.647513	0.979386	0.0309804	-0.147658	0.0236102	-0.227723	-0.00537659	-0.142282	-0.0524929	0.0417397013004827	0.0364123438079295	0.35550204507458	-0.282677
11275_94_LRP1B_LRP1B	LTB_Q06643_OID31383_v1_Oncology_II	65	Inverse variance weighted	0.203691	0.0727948	1.22592	1.06291	1.41392	0.00513951	77	Inverse variance weighted	-0.0323843	0.0159407	0.968134	0.938354	0.99886	0.0421993	21	Inverse variance weighted	-0.227723	0.0240435435717602	0.796345	0.647513	0.979386	0.0309804	0.203691	-0.0323843	-0.227723	0.007374657236036	0.196316759763964	-0.0397507	0.054500002636686	0.0362050465584222	-0.195152	0.267561605880949
4931_59_F3_TF	LY75_O60449_OID20580_v1_Inflammation	173	Inverse variance weighted	0.115247	0.0206121	1.12215	1.07772	1.16841	2.25e-08	173	Inverse variance weighted	-0.0119947	0.00566778	0.988077	0.977161	0.999115	0.0343193	13	Inverse variance weighted	-0.347664	0.0593337614486847	0.706336	0.505521	0.986923	0.0416369	0.115247	-0.0119947	-0.347664	0.00417014020152193	0.111076872798478	-0.112124	0.120464312640944	0.0361843668913305	-0.972902	1.04527058450481
15447_45_SORD_Sorbitol_dehydrogenase	LTB_Q06643_OID31383_v1_Oncology_II	65	Inverse variance weighted	0.203691	0.0727948	1.22592	1.06291	1.41392	0.00513951	77	Inverse variance weighted	-0.0332831	0.013868	0.967265	0.941327	0.993917	0.0163955	46	Inverse variance weighted	-0.219927	0.0192685877422833	0.802577	0.675974	0.952892	0.0120419	0.203691	-0.0332831	-0.219927	0.00731984900021856	0.196371567999781	-0.0304466	0.0450862809750938	0.0359359717165626	-0.149474	0.221346002885796
6600_70_RELL2_RELL2	LY75_O60449_OID20580_v1_Inflammation	173	Inverse variance weighted	0.115247	0.0206121	1.12215	1.07772	1.16841	2.25e-08	173	Inverse variance weighted	-0.00954535	0.00483842	0.9905	0.981151	0.999938	0.0485158	10	Inverse variance weighted	-0.431535	0.084952220395708	0.649511	0.441586	0.955339	0.0283732	0.115247	-0.00954535	-0.431535	0.00411915527739713	0.111127857722603	-0.162387	0.170625507252985	0.0357419699666935	-1.40904	1.48051999623613
5491_12_SPOCK2_Testican_2	S100A11_P31949_OID20130_v1_Cardiometabolic	16	Inverse variance weighted	0.304764	0.114346	1.35631	1.08399	1.69704	0.00769246	16	Inverse variance weighted	0.0524885	0.0260209	1.05389	1.00149	1.10903	0.0436783	47	Inverse variance weighted	0.205713	0.0193786085290982	1.2284	1.02177	1.47682	0.0285836	0.304764	0.0524885	0.205713	0.0107975646060607	0.293966671393939	-0.0271845	0.0487796373230931	0.0354292378521103	-0.0891985	0.160056960630686
19553_14_STX1A_STX1a	SLMAP_Q14BN4_OID31441_v1_Oncology_II	4	Inverse variance weighted	-1.26651	0.364859	0.281812	0.137843	0.576148	0.00051806	4	Inverse variance weighted	0.191666	0.0785345	1.21127	1.03846	1.41283	0.0146659	40	Inverse variance weighted	-0.22952	0.0270879906609741	0.794915	0.655841	0.963481	0.0193275	-1.26651	0.191666	-0.22952	-0.0439911	-1.22252	-0.0970836	0.00910132783644692	0.0347340048880691	0.0766541297468547	-0.00718612
5660_51_SOD3_SOD3	DPP6_P42658_OID21354_v1_Oncology	45	Inverse variance weighted	-0.213294	0.0793609	0.807918	0.691535	0.943889	0.00719566	46	Inverse variance weighted	0.135691	0.0258899	1.14533	1.08866	1.20495	1.6e-07	182	Inverse variance weighted	-0.0535002	0.00377983308628944	0.947906	0.900683	0.997605	0.0401713	-0.213294	0.135691	-0.0535002	-0.00725952	-0.206035	-0.014668	0.000148956881529784	0.0340351979460982	0.0687687588369062	-0.000698363
9959_60_TMEM59L_TM59L	LY75_O60449_OID20580_v1_Inflammation	173	Inverse variance weighted	0.115247	0.0206121	1.12215	1.07772	1.16841	2.25e-08	173	Inverse variance weighted	-0.0129226	0.00537267	0.98716	0.97682	0.997611	0.0161611	17	Inverse variance weighted	-0.302982	0.0457376006103597	0.738612	0.549438	0.992921	0.0447429	0.115247	-0.0129226	-0.302982	0.00391533047432718	0.111331682525673	-0.0857304	0.0935610276706322	0.0339733792000942	-0.743884	0.811830391392722
5708_1_LEAP2_LEAP2	BTN2A1_Q7KYR7_OID20713_v1_Inflammation	133	Inverse variance weighted	-0.145131	0.0390027	0.864909	0.801255	0.93362	0.000198394	143	Inverse variance weighted	0.0203614	0.00927709	1.02057	1.00218	1.0393	0.0281775	50	Inverse variance weighted	-0.241684	0.0184016278661999	0.785305	0.676442	0.911687	0.0015015	-0.145131	0.0203614	-0.241684	-0.00492102	-0.14021	-0.0409882	0.0311461723693317	0.0339073945456903	0.282421909366552	-0.214607
3580_25_SERPINA1_a1_Antitrypsin	CES1_P23141_OID20244_v1_Cardiometabolic	56	Inverse variance weighted	-0.134492	0.0621073	0.87416	0.77397	0.987319	0.0303509	57	Inverse variance weighted	-0.0504321	0.0212807	0.950818	0.911975	0.991316	0.0177953	133	Inverse variance weighted	0.089673	0.00327876424931247	1.09382	1.0222	1.17045	0.00944517	-0.134492	-0.0504321	0.089673	-0.0045224	-0.12997	-0.0109488	0.00190398024178178	0.0336257304160573	0.081408271170472	-0.0141568
5708_1_LEAP2_LEAP2	LAMP3_Q9UQV4_OID20638_v1_Inflammation	47	Inverse variance weighted	0.322849	0.0879173	1.38106	1.16245	1.64077	0.000240486	47	Inverse variance weighted	-0.0445206	0.0178007	0.956456	0.923661	0.990415	0.012382	50	Inverse variance weighted	-0.241684	0.018417716365902	0.785305	0.676442	0.911687	0.0015015	0.322849	-0.0445206	-0.241684	0.0107598946845026	0.312088647315497	-0.0253388	0.0468586187616705	0.033327995281771	-0.0784852	0.145141181283918
14254_27_PTPN4_PTN4	MATN3_O15232_OID20979_v1_Neurology	89	Inverse variance weighted	-0.0841588	0.0386753	0.919285	0.852176	0.99168	0.0295529	82	Inverse variance weighted	0.021661	0.00805849	1.0219	1.00588	1.03817	0.00718876	53	Inverse variance weighted	-0.126746	0.00698506842909419	0.880957	0.790785	0.981412	0.021416	-0.0841588	0.021661	-0.126746	-0.00274545	-0.0814133	-0.0164362	0.0109452831015716	0.032622276062087	0.195299703131131	-0.130055
12475_48_CLIC5_CLIC5	PSG1_P11464_OID20916_v1_Neurology	155	Inverse variance weighted	0.0677669	0.0228798	1.07012	1.02319	1.1192	0.00305781	152	Inverse variance weighted	-0.0159727	0.00493239	0.984154	0.974686	0.993715	0.00120229	60	Inverse variance weighted	-0.137838	0.00943725429362627	0.87124	0.761834	0.996358	0.0440834	0.0677669	-0.0159727	-0.137838	0.00220165100110653	0.0655652749988935	-0.0162954	0.020698669416614	0.0324885771136577	-0.240462	0.30543910781218
2516_57_CCL21_6Ckine	CD302_Q8IX05_OID21328_v1_Oncology	84	Inverse variance weighted	-0.215996	0.071898	0.805739	0.699832	0.927673	0.00266285	95	Inverse variance weighted	0.0530593	0.0204176	1.05449	1.01313	1.09755	0.00935767	107	Inverse variance weighted	-0.130167	0.00582893906731596	0.877948	0.805407	0.957024	0.00309297	-0.215996	0.0530593	-0.130167	-0.0069066	-0.209089	-0.0183313	0.00451812261763249	0.0319756556524427	0.0848689807526694	-0.0209177
17224_12_OGN_MIME	MIA_Q16674_OID21531_v1_Oncology	92	Inverse variance weighted	-0.109323	0.0345502	0.896441	0.837745	0.95925	0.0015553	85	Inverse variance weighted	0.0201217	0.00973736	1.02033	1.00104	1.03999	0.0387871	85	Inverse variance weighted	-0.172159	0.0105038138553938	0.841845	0.746976	0.948763	0.00476939	-0.109323	0.0201217	-0.172159	-0.00346413	-0.105858	-0.0240516	0.017123344911213	0.031687256681926	0.220005987074087	-0.156631
3327_27_NTN4_NET4	PCDHB15_Q9Y5E8_OID31377_v1_Oncology_II	85	Inverse variance weighted	-0.138503	0.041758	0.87066	0.802239	0.944917	0.00091051	84	Inverse variance weighted	0.021514	0.00992771	1.02175	1.00206	1.04182	0.0302297	29	Inverse variance weighted	-0.201931	0.0167007779050455	0.817151	0.694877	0.960941	0.0146152	-0.138503	0.021514	-0.201931	-0.00434435	-0.134159	-0.0370779	0.0283891733895358	0.0313663937680404	0.267703778347306	-0.204971
13565_2_RBL2_p130	KDM3A_Q9Y4C1_OID30426_v1_Inflammation_II	15	Inverse variance weighted	-0.482031	0.205717	0.617528	0.412617	0.9242	0.0191202	18	Inverse variance weighted	0.158574	0.0442969	1.17184	1.07439	1.27813	0.000343872	151	Inverse variance weighted	-0.0945989	0.00801187802955304	0.909738	0.839928	0.985349	0.0202156	-0.482031	0.158574	-0.0945989	-0.0150009	-0.46703	-0.0307042	0.000702396636462679	0.0311201767170433	0.0636975146929095	-0.00145716
3181_50_CTSS_Cathepsin_S	IFIT3_O14879_OID31283_v1_Oncology_II	17	Inverse variance weighted	0.332106	0.140452	1.3939	1.05847	1.83564	0.0180515	17	Inverse variance weighted	0.0843919	0.0385799	1.08806	1.00881	1.17352	0.028709	63	Inverse variance weighted	0.121759	0.00821568938295715	1.12948	1.00034	1.2753	0.0493662	0.332106	0.0843919	0.121759	0.0102754480185365	0.321831027981463	-0.0058273	0.0263781992091325	0.0309402217695282	-0.0175465	0.0794269341773766
8099_42_SPON2_SPON2	TMPRSS5_Q9H3S3_OID20947_v1_Neurology	131	Inverse variance weighted	-0.109767	0.0340903	0.896043	0.838128	0.957959	0.00128243	126	Inverse variance weighted	0.015692	0.00645479	1.01582	1.00305	1.02875	0.0150546	36	Inverse variance weighted	-0.214675	0.0162352962129696	0.806804	0.695655	0.935712	0.00453073	-0.109767	0.015692	-0.214675	-0.00336867	-0.106398	-0.0351899	0.0284525063235682	0.0306893532980593	0.320587212072937	-0.259209
6626_81_CHST12_CHSTC	RTN4R_Q9BZR6_OID21424_v1_Oncology	65	Inverse variance weighted	0.166198	0.0544379	1.18081	1.06131	1.31376	0.00226572	63	Inverse variance weighted	-0.0241271	0.0113022	0.976162	0.954775	0.998027	0.0327834	29	Inverse variance weighted	-0.209261	0.0186690251393123	0.811184	0.681062	0.966166	0.0189839	0.166198	-0.0241271	-0.209261	0.00504885517318384	0.161149468826816	-0.0315424	0.041640144446236	0.0303784963149438	-0.189788	0.250544911910399
3181_50_CTSS_Cathepsin_S	ICAM3_P32942_OID20277_v1_Cardiometabolic	168	Inverse variance weighted	0.171889	0.0444226	1.18755	1.08852	1.29558	0.000109099	181	Inverse variance weighted	0.0423289	0.0127387	1.04324	1.01751	1.06961	0.000890988	63	Inverse variance weighted	0.121759	0.00756226583144211	1.12948	1.00034	1.2753	0.0493662	0.171889	0.0423289	0.121759	0.00515390494002994	0.16673532205997	-0.00966814	0.0199759459696565	0.0299838740913643	-0.0562463	0.116214065990631
5660_51_SOD3_SOD3	CPA1_P15085_OID20280_v1_Cardiometabolic	78	Inverse variance weighted	-0.151285	0.0687769	0.859602	0.751196	0.983652	0.0278314	78	Inverse variance weighted	0.0842661	0.0183063	1.08792	1.04958	1.12766	4.16e-06	182	Inverse variance weighted	-0.0535002	0.00207973916005705	0.947906	0.900683	0.997605	0.0401713	-0.151285	0.0842661	-0.0535002	-0.00450826	-0.146777	-0.00858455	-0.000431969	0.0297996849850829	0.0567440443738955	0.0028553255962703
2516_57_CCL21_6Ckine	TMPRSS5_Q9H3S3_OID20947_v1_Neurology	131	Inverse variance weighted	-0.109767	0.0340903	0.896043	0.838128	0.957959	0.00128243	126	Inverse variance weighted	0.0249594	0.00674315	1.02527	1.01181	1.03891	0.000214369	107	Inverse variance weighted	-0.130167	0.00572985336206454	0.877948	0.805407	0.957024	0.00309297	-0.109767	0.0249594	-0.130167	-0.00324891	-0.106518	-0.0144794	0.00798160557472438	0.0295982477674923	0.131910653957507	-0.0727142
11327_56_CLK2_CLK2	PCDHB15_Q9Y5E8_OID31377_v1_Oncology_II	85	Inverse variance weighted	-0.138503	0.041758	0.87066	0.802239	0.944917	0.00091051	84	Inverse variance weighted	0.0314983	0.01166	1.032	1.00868	1.05586	0.00690477	73	Inverse variance weighted	-0.129043	0.008289203789244	0.878936	0.775055	0.996741	0.0443391	-0.138503	0.0314983	-0.129043	-0.00406464	-0.134439	-0.0203115	0.0121822031275378	0.0293468400132555	0.146649683924653	-0.087956
9177_6_FAM3B_FAM3B	CPA1_P15085_OID20280_v1_Cardiometabolic	78	Inverse variance weighted	-0.151285	0.0687769	0.859602	0.751196	0.983652	0.0278314	78	Inverse variance weighted	0.0387651	0.0181769	1.03953	1.00314	1.07723	0.0329533	89	Inverse variance weighted	-0.113441	0.00606474344033295	0.892757	0.804515	0.990679	0.0326493	-0.151285	0.0387651	-0.113441	-0.00439754	-0.146888	-0.0162844	0.00748935761761249	0.0290678341400795	0.107640488824714	-0.0495048
11327_56_CLK2_CLK2	PI16_Q6UXB8_OID30676_v1_Inflammation_II	76	Inverse variance weighted	-0.111142	0.055674	0.894812	0.802308	0.997981	0.0459018	76	Inverse variance weighted	0.02491	0.0120436	1.02522	1.00131	1.04971	0.038611	73	Inverse variance weighted	-0.129043	0.00828649606844044	0.878936	0.775055	0.996741	0.0443391	-0.111142	0.02491	-0.129043	-0.00321446	-0.107927	-0.019456	0.0130270719347739	0.0289221622215033	0.17505562763128	-0.117211
3580_25_SERPINA1_a1_Antitrypsin	CPA1_P15085_OID20280_v1_Cardiometabolic	78	Inverse variance weighted	-0.151285	0.0687769	0.859602	0.751196	0.983652	0.0278314	78	Inverse variance weighted	-0.0486753	0.0169758	0.95249	0.92132	0.984715	0.00413944	133	Inverse variance weighted	0.089673	0.00320643771690995	1.09382	1.0222	1.17045	0.00944517	-0.151285	-0.0486753	0.089673	-0.00436486	-0.146921	-0.0106495	0.00191975894455183	0.0288518150112539	0.0703932793744558	-0.0126896
17224_12_OGN_MIME	IL15_P40933_OID20562_v1_Inflammation	87	Inverse variance weighted	-0.176418	0.067878	0.838268	0.733844	0.95755	0.00934837	87	Inverse variance weighted	0.0295193	0.0146529	1.02996	1.0008	1.05997	0.0439493	85	Inverse variance weighted	-0.172159	0.0105108900975797	0.841845	0.746976	0.948763	0.00476939	-0.176418	0.0295193	-0.172159	-0.00508203	-0.171336	-0.0256834	0.0155193146672656	0.028806753328819	0.145582502538952	-0.087969
5660_51_SOD3_SOD3	PKD1_P98161_OID30328_v1_Cardiometabolic_II	61	Inverse variance weighted	-0.161238	0.0676922	0.851089	0.74534	0.971843	0.0172221	55	Inverse variance weighted	0.0864865	0.0240401	1.09034	1.04015	1.14294	0.000321171	182	Inverse variance weighted	-0.0535002	0.00250370155781855	0.947906	0.900683	0.997605	0.0401713	-0.161238	0.0864865	-0.0535002	-0.00462705	-0.156611	-0.0095343	0.000280208386086532	0.0286969637593677	0.0591317811603535	-0.00173785
15447_45_SORD_Sorbitol_dehydrogenase	ENTPD6_O75354_OID20100_v1_Cardiometabolic	105	Inverse variance weighted	-0.148172	0.0388169	0.862283	0.799113	0.930447	0.000134981	111	Inverse variance weighted	0.019293	0.00797436	1.01948	1.00367	1.03554	0.0155469	46	Inverse variance weighted	-0.219927	0.0192636729772936	0.802577	0.675974	0.952892	0.0120419	-0.148172	0.019293	-0.219927	-0.00424305	-0.143929	-0.0419999	0.0335137454875572	0.0286360750719093	0.283454101627531	-0.226182
12475_48_CLIC5_CLIC5	RTN4R_Q9BZR6_OID21424_v1_Oncology	65	Inverse variance weighted	0.166198	0.0544379	1.18081	1.06131	1.31376	0.00226572	63	Inverse variance weighted	-0.0337614	0.0132588	0.966802	0.942001	0.992256	0.0108859	60	Inverse variance weighted	-0.137838	0.00944753621448926	0.87124	0.761834	0.996358	0.0440834	0.166198	-0.0337614	-0.137838	0.00465361246414169	0.161544711535858	-0.0138636	0.0231707834445407	0.0280003573570435	-0.0834158	0.139416468751759
14254_27_PTPN4_PTN4	GLB1_P16278_OID20949_v1_Neurology	63	Inverse variance weighted	0.138124	0.0590407	1.14812	1.02266	1.28897	0.0193113	62	Inverse variance weighted	-0.0304869	0.0137162	0.969973	0.944244	0.996403	0.0262361	53	Inverse variance weighted	-0.126746	0.00699539647451743	0.880957	0.790785	0.981412	0.021416	0.138124	-0.0304869	-0.126746	0.00386410044333861	0.134259562556661	-0.00984688	0.0175750775333928	0.0279756586193244	-0.0712903	0.127241611984999
10916_44_PLA2R1_PLA2R	PKD1_P98161_OID30328_v1_Cardiometabolic_II	61	Inverse variance weighted	-0.161238	0.0676922	0.851089	0.74534	0.971843	0.0172221	55	Inverse variance weighted	0.0803366	0.0186594	1.08365	1.04474	1.12402	1.67e-05	463	Inverse variance weighted	-0.0561399	0.00188299005427896	0.945407	0.908533	0.983778	0.00567913	-0.161238	0.0803366	-0.0561399	-0.00451009	-0.156728	-0.00820075	-0.000819431	0.027971605504714	0.0508610981804245	0.0050821128290035
2516_57_CCL21_6Ckine	DDR1_Q08345_OID21009_v1_Neurology	115	Inverse variance weighted	0.179072	0.0459826	1.19611	1.09302	1.30891	9.85e-05	140	Inverse variance weighted	-0.0379111	0.0152315	0.962799	0.93448	0.991975	0.0128107	107	Inverse variance weighted	-0.130167	0.00575641680338406	0.877948	0.805407	0.957024	0.00309297	0.179072	-0.0379111	-0.130167	0.00493479069937373	0.174137565300626	-0.00634779	0.0162173676340065	0.0275575237273012	-0.0354482	0.0905632114093953
6626_81_CHST12_CHSTC	LY75_O60449_OID20580_v1_Inflammation	173	Inverse variance weighted	0.115247	0.0206121	1.12215	1.07772	1.16841	2.25e-08	173	Inverse variance weighted	-0.0151167	0.00596401	0.984997	0.97355	0.996579	0.0112558	29	Inverse variance weighted	-0.209261	0.0186672512195858	0.811184	0.681062	0.966166	0.0189839	0.115247	-0.0151167	-0.209261	0.00316332839361649	0.112083684606384	-0.0334245	0.0397511407840047	0.0274482462605472	-0.290025	0.34492122398005
16900_29_MDGA1_MDGA1	LTB_Q06643_OID31383_v1_Oncology_II	65	Inverse variance weighted	0.203691	0.0727948	1.22592	1.06291	1.41392	0.00513951	77	Inverse variance weighted	-0.156671	0.0429534	0.854985	0.785952	0.930082	0.000264844	483	Inverse variance weighted	-0.0356158	0.00675372629514726	0.965011	0.935159	0.995815	0.0263123	0.203691	-0.156671	-0.0356158	0.00557996407592819	0.198111452924072	-0.00765734	0.0188172676144168	0.027394203241898	-0.0375928	0.0923812494976988
11275_94_LRP1B_LRP1B	LY75_O60449_OID20580_v1_Inflammation	173	Inverse variance weighted	0.115247	0.0206121	1.12215	1.07772	1.16841	2.25e-08	173	Inverse variance weighted	-0.0138338	0.00465608	0.986261	0.977302	0.995303	0.00296713	21	Inverse variance weighted	-0.227723	0.02403808735461	0.796345	0.647513	0.979386	0.0309804	0.115247	-0.0138338	-0.227723	0.003150272843339	0.112096740156661	-0.0439644	0.0502649240583745	0.0273349630618106	-0.38148	0.436149473638632
4430_44_COLEC11_Collectin_Kidney_1	DPP6_P42658_OID21354_v1_Oncology	45	Inverse variance weighted	-0.213294	0.0793609	0.807918	0.691535	0.943889	0.00719566	46	Inverse variance weighted	0.0886029	0.0283199	1.09265	1.03365	1.15501	0.00175611	197	Inverse variance weighted	-0.0649238	0.00302952848481531	0.937139	0.890321	0.986418	0.0130289	-0.213294	0.0886029	-0.0649238	-0.00575244	-0.207542	-0.0116903	0.000185435246937064	0.0269694914646782	0.0548083694509725	-0.000869387
9177_6_FAM3B_FAM3B	LRRN1_Q6UXK5_OID20438_v1_Inflammation	103	Inverse variance weighted	0.0783139	0.0390483	1.08146	1.00178	1.16748	0.0449023	102	Inverse variance weighted	-0.0184513	0.00780824	0.981718	0.966808	0.996858	0.0181251	89	Inverse variance weighted	-0.113441	0.0060253933177037	0.892757	0.804515	0.990679	0.0326493	0.0783139	-0.0184513	-0.113441	0.00209312439151531	0.0762208096084847	-0.00971665	0.0139028952942146	0.026727355971101	-0.124073	0.177527734645722
5005_4_MAPK12_MK12	TCN2_P20062_OID20341_v1_Cardiometabolic	127	Inverse variance weighted	0.158633	0.0418706	1.17191	1.07957	1.27214	0.000151476	124	Inverse variance weighted	-0.0162759	0.00673681	0.983856	0.97095	0.996933	0.0156937	23	Inverse variance weighted	-0.257155	0.0294513969905512	0.773248	0.617777	0.967846	0.0247444	0.158633	-0.0162759	-0.257155	0.00418542351781699	0.154447191482183	-0.0535393	0.0619101616192973	0.026384382037811	-0.337505	0.390273851435263
12475_48_CLIC5_CLIC5	LRRN1_Q6UXK5_OID20438_v1_Inflammation	103	Inverse variance weighted	0.0783139	0.0390483	1.08146	1.00178	1.16748	0.0449023	102	Inverse variance weighted	-0.0149625	0.00683412	0.985149	0.972041	0.998434	0.0285692	60	Inverse variance weighted	-0.137838	0.00943747942385157	0.87124	0.761834	0.996358	0.0440834	0.0783139	-0.0149625	-0.137838	0.00206239927901445	0.0762515347209855	-0.0164351	0.0205598589497635	0.0263350233307709	-0.209861	0.262531300620954
14254_27_PTPN4_PTN4	MST1_P26927_OID30713_v1_Inflammation_II	186	Inverse variance weighted	-0.0619263	0.0216835	0.939952	0.900842	0.980761	0.00429115	186	Inverse variance weighted	0.0127674	0.00504585	1.01285	1.00288	1.02292	0.011397	53	Inverse variance weighted	-0.126746	0.00698318421304395	0.880957	0.790785	0.981412	0.021416	-0.0619263	0.0127674	-0.126746	-0.00161822	-0.0603081	-0.0153053	0.0120688167625315	0.0261314347354392	0.247152724067525	-0.19489
3181_50_CTSS_Cathepsin_S	MIA_Q16674_OID21531_v1_Oncology	92	Inverse variance weighted	-0.109323	0.0345502	0.896441	0.837745	0.95925	0.0015553	85	Inverse variance weighted	-0.0232987	0.00854211	0.976971	0.96075	0.993465	0.00638148	63	Inverse variance weighted	0.121759	0.00754564258007516	1.12948	1.00034	1.2753	0.0493662	-0.109323	-0.0232987	0.121759	-0.00283681	-0.106486	-0.0176263	0.0119526460008797	0.0259490347574517	0.161231880610921	-0.109334
5491_12_SPOCK2_Testican_2	SLMAP_Q14BN4_OID31441_v1_Oncology_II	4	Inverse variance weighted	-1.26651	0.364859	0.281812	0.137843	0.576148	0.00051806	4	Inverse variance weighted	-0.158731	0.0794015	0.853225	0.730257	0.9969	0.0455977	47	Inverse variance weighted	0.205713	0.0230762548498035	1.2284	1.02177	1.47682	0.0285836	-1.26651	-0.158731	0.205713	-0.0326531	-1.23386	-0.0778826	0.0125763580232421	0.0257818539102218	0.0614936014770358	-0.00992989
13565_2_RBL2_p130	LTB_Q06643_OID31383_v1_Oncology_II	65	Inverse variance weighted	0.203691	0.0727948	1.22592	1.06291	1.41392	0.00513951	77	Inverse variance weighted	-0.0554566	0.0184404	0.946053	0.91247	0.980872	0.00263536	151	Inverse variance weighted	-0.0945989	0.00398683276126265	0.909738	0.839928	0.985349	0.0202156	0.203691	-0.0554566	-0.0945989	0.0052461306958232	0.198445286304177	-0.00256806	0.013060322907898	0.0257552859766457	-0.0126076	0.0641181798440628
10916_44_PLA2R1_PLA2R	DPP6_P42658_OID21354_v1_Oncology	45	Inverse variance weighted	-0.213294	0.0793609	0.807918	0.691535	0.943889	0.00719566	46	Inverse variance weighted	0.0973804	0.019314	1.10228	1.06133	1.14481	4.61e-07	463	Inverse variance weighted	-0.0561399	0.00219908891676043	0.945407	0.908533	0.983778	0.00567913	-0.213294	0.0973804	-0.0561399	-0.00546693	-0.207827	-0.00977714	-0.00115671	0.0256309026896983	0.0458387232603103	0.00542308211908638
19277_4_TSTD1_KAT	TYRO3_Q06418_OID20161_v1_Cardiometabolic	154	Inverse variance weighted	0.091315	0.0317043	1.09561	1.0296	1.16586	0.00397413	146	Inverse variance weighted	0.0132442	0.0063549	1.01333	1.00079	1.02603	0.0371518	27	Inverse variance weighted	0.176346	0.0129640938499306	1.19285	1.03279	1.37772	0.0164478	0.091315	0.0132442	0.176346	0.00233556002807969	0.0889794149719203	-0.0230741	0.0277451839739436	0.0255769661885106	-0.252687	0.303840459617314
7905_30_HP_HPT	ITIH4_Q14624_OID30762_v1_Inflammation_II	43	Inverse variance weighted	-0.161842	0.0737425	0.850576	0.736109	0.982842	0.0281859	43	Inverse variance weighted	0.0592527	0.0256361	1.06104	1.00905	1.11572	0.0208163	397	Inverse variance weighted	-0.069507	0.00211775933717264	0.932854	0.894833	0.97249	0.00106043	-0.161842	0.0592527	-0.069507	-0.00411848	-0.157723	-0.00826929	3.23299441694902e-05	0.0254475486821788	0.0510948599360873	-0.000199763
14254_27_PTPN4_PTN4	GGH_Q92820_OID20416_v1_Cardiometabolic	116	Inverse variance weighted	0.168732	0.0409451	1.1838	1.09251	1.28272	3.77e-05	113	Inverse variance weighted	-0.0338272	0.0113886	0.966739	0.945398	0.98856	0.00297542	53	Inverse variance weighted	-0.126746	0.00699350586943977	0.880957	0.790785	0.981412	0.021416	0.168732	-0.0338272	-0.126746	0.00428746632942841	0.164444195670572	-0.00941981	0.0179947378335304	0.0254099691700329	-0.0558271	0.106647072755855
13565_2_RBL2_p130	BTN2A1_Q7KYR7_OID20713_v1_Inflammation	133	Inverse variance weighted	-0.145131	0.0390027	0.864909	0.801255	0.93362	0.000198394	143	Inverse variance weighted	0.0383709	0.00926764	1.03912	1.02041	1.05816	3.47e-05	151	Inverse variance weighted	-0.0945989	0.00386981925022285	0.909738	0.839928	0.985349	0.0202156	-0.145131	0.0383709	-0.0945989	-0.00362984	-0.141501	-0.0112147	0.00395500093745066	0.0250107951895758	0.0772728157241843	-0.0272512
19277_4_TSTD1_KAT	GGH_Q92820_OID20416_v1_Cardiometabolic	116	Inverse variance weighted	0.168732	0.0409451	1.1838	1.09251	1.28272	3.77e-05	113	Inverse variance weighted	0.0238036	0.00934603	1.02409	1.0055	1.04302	0.0108678	27	Inverse variance weighted	0.176346	0.0129657293730101	1.19285	1.03279	1.37772	0.0164478	0.168732	0.0238036	0.176346	0.00419767493398788	0.164533987066012	-0.0212152	0.0296105045050876	0.0248778141827814	-0.125733	0.175488726621371
14254_27_PTPN4_PTN4	ADAM23_O75077_OID20651_v1_Inflammation	108	Inverse variance weighted	-0.0661019	0.0288822	0.936035	0.884519	0.990552	0.0220985	104	Inverse variance weighted	0.0128715	0.00627779	1.01295	1.00057	1.0255	0.0403325	53	Inverse variance weighted	-0.126746	0.00698335455976326	0.880957	0.790785	0.981412	0.021416	-0.0661019	0.0128715	-0.126746	-0.00163142	-0.0644705	-0.0153188	0.0120559569888134	0.0246803398388615	0.231745037942596	-0.182384
3181_50_CTSS_Cathepsin_S	LGALS1_P09382_OID20154_v1_Cardiometabolic	30	Inverse variance weighted	0.262312	0.0831253	1.29993	1.10449	1.52995	0.00160155	26	Inverse variance weighted	0.053132	0.0215605	1.05457	1.01093	1.10009	0.0137274	63	Inverse variance weighted	0.121759	0.00762950912760637	1.12948	1.00034	1.2753	0.0493662	0.262312	0.053132	0.121759	0.00646928401873475	0.255842874981265	-0.00848455	0.0214231219088432	0.0246625396374964	-0.0323453	0.081670335033319
11308_8_CREB3L4_CR3L4	ITIH4_Q14624_OID30762_v1_Inflammation_II	43	Inverse variance weighted	-0.161842	0.0737425	0.850576	0.736109	0.982842	0.0281859	43	Inverse variance weighted	0.046933	0.0234197	1.04805	1.00103	1.09728	0.0450706	110	Inverse variance weighted	-0.0823278	0.0035588557001289	0.92097	0.849666	0.998258	0.0452412	-0.161842	0.046933	-0.0823278	-0.00386389	-0.157978	-0.0108393	0.00311146284241983	0.0238745066855873	0.0669743425577837	-0.0192253
17224_12_OGN_MIME	PSG1_P11464_OID20916_v1_Neurology	155	Inverse variance weighted	0.0677669	0.0228798	1.07012	1.02319	1.1192	0.00305781	152	Inverse variance weighted	-0.00937019	0.00457107	0.990674	0.981837	0.999589	0.0403751	85	Inverse variance weighted	-0.172159	0.0105020736413276	0.841845	0.746976	0.948763	0.00476939	0.0677669	-0.00937019	-0.172159	0.00161316495422316	0.0661537610457768	-0.0189709	0.0221972292912252	0.0238046057190666	-0.279943	0.32755254814458
19553_14_STX1A_STX1a	LY75_O60449_OID20580_v1_Inflammation	173	Inverse variance weighted	0.115247	0.0206121	1.12215	1.07772	1.16841	2.25e-08	173	Inverse variance weighted	-0.0118997	0.00465898	0.988171	0.979188	0.997236	0.0106446	40	Inverse variance weighted	-0.22952	0.0225208520498055	0.794915	0.655841	0.963481	0.0193275	0.115247	-0.0118997	-0.22952	0.00273123431739717	0.112515778682603	-0.0414096	0.046872104335016	0.0236989597066361	-0.359312	0.406709927788029
3580_25_SERPINA1_a1_Antitrypsin	PECR_Q9BY49_OID30228_v1_Cardiometabolic_II	19	Inverse variance weighted	0.296853	0.114612	1.34562	1.07488	1.68454	0.00959588	17	Inverse variance weighted	0.0777655	0.0213416	1.08087	1.03659	1.12704	0.000268598	133	Inverse variance weighted	0.089673	0.0035146663285468	1.09382	1.0222	1.17045	0.00944517	0.296853	0.0777655	0.089673	0.00697346341365898	0.289879443586341	8.47174097072583e-05	0.0138622094176107	0.023491309160934	0.000285385144324217	0.0466972331775437
3580_25_SERPINA1_a1_Antitrypsin	SCGN_O76038_OID20457_v1_Inflammation	22	Inverse variance weighted	-0.259314	0.130132	0.771581	0.597875	0.995754	0.0462949	22	Inverse variance weighted	-0.0679058	0.0284247	0.934348	0.883717	0.987881	0.0168956	133	Inverse variance weighted	0.089673	0.00365022591095803	1.09382	1.0222	1.17045	0.00944517	-0.259314	-0.0679058	0.089673	-0.00608932	-0.253225	-0.0132438	0.00106512755693279	0.0234823867424813	0.0510722529441835	-0.00410748
11327_56_CLK2_CLK2	PSG1_P11464_OID20916_v1_Neurology	155	Inverse variance weighted	0.0677669	0.0228798	1.07012	1.02319	1.1192	0.00305781	152	Inverse variance weighted	-0.0122486	0.00513413	0.987826	0.977936	0.997817	0.0170462	73	Inverse variance weighted	-0.129043	0.00828130230159246	0.878936	0.775055	0.996741	0.0443391	0.0677669	-0.0122486	-0.129043	0.00158059230870074	0.0661863336912993	-0.0146508	0.017811944819822	0.0233239487460409	-0.216193	0.262841268907815
12475_48_CLIC5_CLIC5	TMPRSS5_Q9H3S3_OID20947_v1_Neurology	131	Inverse variance weighted	-0.109767	0.0340903	0.896043	0.838128	0.957959	0.00128243	126	Inverse variance weighted	0.0184862	0.00686953	1.01866	1.00503	1.03247	0.00712277	60	Inverse variance weighted	-0.137838	0.00943777985620216	0.87124	0.761834	0.996358	0.0440834	-0.109767	0.0184862	-0.137838	-0.00254811	-0.107219	-0.0210462	0.0159499417036453	0.0232138059007329	0.191735041116388	-0.145307
10851_77_EBI3_IL27B	MILR1_Q7Z6M3_OID20482_v1_Inflammation	114	Inverse variance weighted	0.0790417	0.0362447	1.08225	1.00803	1.16193	0.0291998	111	Inverse variance weighted	0.0380547	0.0142068	1.03879	1.01026	1.06812	0.00739264	314	Inverse variance weighted	0.0481619	0.00122612175246801	1.04934	1.00338	1.0974	0.0350521	0.0790417	0.0380547	0.0481619	0.00183278685753108	0.0772089171424689	-0.000570412	0.00423598549236838	0.023187592938673	-0.00721659	0.0535917784916223
10851_77_EBI3_IL27B	MSR1_P21757_OID21063_v1_Neurology	90	Inverse variance weighted	0.134499	0.0622835	1.14396	1.0125	1.2925	0.0308138	96	Inverse variance weighted	0.0645779	0.0238282	1.06671	1.01804	1.11771	0.00672537	314	Inverse variance weighted	0.0481619	0.00189180358969176	1.04934	1.00338	1.0974	0.0350521	0.134499	0.0645779	0.0481619	0.00311019818200647	0.131389030817994	-0.000597737	0.00681813321780231	0.0231242826083893	-0.00444417	0.0506927308691287
6402_8_PILRA_PILRA_isoform_FDF03_deltaTM	BTN2A1_Q7KYR7_OID20713_v1_Inflammation	133	Inverse variance weighted	-0.145131	0.0390027	0.864909	0.801255	0.93362	0.000198394	143	Inverse variance weighted	0.0613592	0.00782182	1.06328	1.0471	1.07971	4.34e-15	545	Inverse variance weighted	-0.0544331	0.00096119254719382	0.947022	0.919045	0.97585	0.000373905	-0.145131	0.0613592	-0.0544331	-0.00333997	-0.141791	-0.00522391	-0.00145603	0.0230134560809252	0.0359943891403344	0.010032523021516
4430_44_COLEC11_Collectin_Kidney_1	PSG1_P11464_OID20916_v1_Neurology	155	Inverse variance weighted	0.0677669	0.0228798	1.07012	1.02319	1.1192	0.00305781	152	Inverse variance weighted	-0.0238695	0.00498197	0.976413	0.966925	0.985994	1.66e-06	197	Inverse variance weighted	-0.0649238	0.00170175896262364	0.937139	0.890321	0.986418	0.0130289	0.0677669	-0.0238695	-0.0649238	0.00154970103578067	0.0662172249642193	-0.00178575	0.00488514860252301	0.0228681028822331	-0.0263513	0.0720875047884422
9177_6_FAM3B_FAM3B	PSG1_P11464_OID20916_v1_Neurology	155	Inverse variance weighted	0.0677669	0.0228798	1.07012	1.02319	1.1192	0.00305781	152	Inverse variance weighted	-0.0136484	0.00494822	0.986444	0.976923	0.996058	0.00581112	89	Inverse variance weighted	-0.113441	0.00602404921662362	0.892757	0.804515	0.990679	0.0326493	0.0677669	-0.0136484	-0.113441	0.00154828857297058	0.0662186374270294	-0.0102588	0.0133554250375529	0.0228472599298747	-0.151384	0.197078808585074
3580_25_SERPINA1_a1_Antitrypsin	MME_P08473_OID21307_v1_Oncology	89	Inverse variance weighted	-0.142375	0.0482966	0.867296	0.788962	0.953406	0.00319901	84	Inverse variance weighted	-0.0361388	0.0124492	0.964506	0.941257	0.98833	0.00369722	133	Inverse variance weighted	0.089673	0.00313063513411383	1.09382	1.0222	1.17045	0.00944517	-0.142375	-0.0361388	0.089673	-0.00324067	-0.139135	-0.00937672	0.00289537234246925	0.0227614600142919	0.0658591006777755	-0.0203362
3580_25_SERPINA1_a1_Antitrypsin	PDIA5_Q14554_OID31209_v1_Oncology_II	81	Inverse variance weighted	-0.132765	0.0559546	0.875671	0.784714	0.977171	0.0176574	96	Inverse variance weighted	-0.0331202	0.0109573	0.967422	0.946867	0.988424	0.00250576	133	Inverse variance weighted	0.089673	0.00311932206426337	1.09382	1.0222	1.17045	0.00944517	-0.132765	-0.0331202	0.089673	-0.00296998	-0.129795	-0.00908385	0.00314388901080788	0.022370233473711	0.0684205854191388	-0.0236801
3580_25_SERPINA1_a1_Antitrypsin	CCL21_O00585_OID20686_v1_Inflammation	52	Inverse variance weighted	-0.245225	0.0979352	0.782528	0.645856	0.948122	0.0122814	50	Inverse variance weighted	-0.0610551	0.0218288	0.940771	0.90137	0.981895	0.00515807	133	Inverse variance weighted	0.089673	0.00337264251108583	1.09382	1.0222	1.17045	0.00944517	-0.245225	-0.0610551	0.089673	-0.00547499	-0.23975	-0.0120854	0.00113539092400511	0.0223263741193587	0.0492827420760751	-0.00462999
10916_44_PLA2R1_PLA2R	ERBB4_Q15303_OID21510_v1_Oncology	81	Inverse variance weighted	-0.149598	0.0671358	0.861054	0.754889	0.98215	0.0258613	82	Inverse variance weighted	0.058489	0.0190467	1.06023	1.02138	1.10056	0.00213473	463	Inverse variance weighted	-0.0561399	0.00159361286930448	0.945407	0.908533	0.983778	0.00567913	-0.149598	0.058489	-0.0561399	-0.00328357	-0.146314	-0.00640705	-0.000160087	0.0219492967714622	0.0428284781181173	0.00107011542480709
13565_2_RBL2_p130	CPA1_P15085_OID20280_v1_Cardiometabolic	78	Inverse variance weighted	-0.151285	0.0687769	0.859602	0.751196	0.983652	0.0278314	78	Inverse variance weighted	0.0347676	0.0142956	1.03538	1.00677	1.0648	0.0150134	151	Inverse variance weighted	-0.0945989	0.00388536700812148	0.909738	0.839928	0.985349	0.0202156	-0.151285	0.0347676	-0.0945989	-0.00328898	-0.147996	-0.0109043	0.00432633974837801	0.0217402282771193	0.0720776585832299	-0.0285972
16900_29_MDGA1_MDGA1	IGF2R_P11717_OID21146_v1_Neurology	99	Inverse variance weighted	0.0986377	0.0477835	1.10367	1.00499	1.21203	0.0389928	105	Inverse variance weighted	-0.0599427	0.0194708	0.941819	0.906553	0.978456	0.00207986	483	Inverse variance weighted	-0.0356158	0.00129931896078611	0.965011	0.935159	0.995815	0.0263123	0.0986377	-0.0599427	-0.0356158	0.00213490860208665	0.0965027533979134	-0.000411757	0.00468157376522743	0.0216439497733295	-0.00417444	0.0474623350787393
3580_25_SERPINA1_a1_Antitrypsin	STAB2_Q8WWQ8_OID30401_v1_Cardiometabolic_II	120	Inverse variance weighted	-0.0957426	0.0483882	0.908698	0.826477	0.999099	0.047857	125	Inverse variance weighted	-0.0225816	0.0103621	0.977671	0.958016	0.997731	0.0293128	133	Inverse variance weighted	0.089673	0.00310696305736364	1.09382	1.0222	1.17045	0.00944517	-0.0957426	-0.0225816	0.089673	-0.00202496	-0.0937176	-0.0081146	0.00406469107813841	0.0211500083478454	0.0847543852844403	-0.0424544
9177_6_FAM3B_FAM3B	CTSS_P25774_OID21056_v1_Neurology	78	Inverse variance weighted	0.114795	0.0524997	1.12164	1.01197	1.24321	0.0287721	73	Inverse variance weighted	-0.0209625	0.010074	0.979256	0.96011	0.998783	0.0374479	89	Inverse variance weighted	-0.113441	0.006027371229926	0.892757	0.804515	0.990679	0.0326493	0.114795	-0.0209625	-0.113441	0.00237800568731803	0.112417479312682	-0.00943564	0.014191653297973	0.0207151499670743	-0.0821952	0.123625535429142
12560_9_NT5C_NT5C	ENTPD6_O75354_OID20100_v1_Cardiometabolic	105	Inverse variance weighted	-0.148172	0.0388169	0.862283	0.799113	0.930447	0.000134981	111	Inverse variance weighted	0.0160637	0.00753649	1.01619	1.00129	1.03132	0.0330513	36	Inverse variance weighted	-0.185497	0.0106698504666914	0.830692	0.742131	0.92982	0.00125934	-0.148172	0.0160637	-0.185497	-0.00297977	-0.145192	-0.0238927	0.0179331402883882	0.0201102389692285	0.161250002023276	-0.12103
3580_25_SERPINA1_a1_Antitrypsin	MATN3_O15232_OID20979_v1_Neurology	89	Inverse variance weighted	-0.0841588	0.0386753	0.919285	0.852176	0.99168	0.0295529	82	Inverse variance weighted	-0.0188141	0.00805022	0.981362	0.965999	0.996969	0.0194343	133	Inverse variance weighted	0.089673	0.00310183925048838	1.09382	1.0222	1.17045	0.00944517	-0.0841588	-0.0188141	0.089673	-0.00168712	-0.0824717	-0.00776672	0.00439248751589621	0.0200468373587086	0.0922865345890846	-0.0521929
4430_44_COLEC11_Collectin_Kidney_1	LIPF_P07098_OID30266_v1_Cardiometabolic_II	57	Inverse variance weighted	-0.146122	0.0619149	0.864052	0.765309	0.975535	0.0182726	61	Inverse variance weighted	0.0451092	0.0163544	1.04614	1.01314	1.08022	0.00581161	197	Inverse variance weighted	-0.0649238	0.0018509709039275	0.937139	0.890321	0.986418	0.0130289	-0.146122	0.0451092	-0.0649238	-0.00292866	-0.143194	-0.00655656	0.00069924485891551	0.020042528330741	0.0448704001038492	-0.00478534
10574_10_AXL_AXL	NME3_Q13232_OID20789_v1_Inflammation	57	Inverse variance weighted	-0.230789	0.0760443	0.793907	0.683974	0.92151	0.00240594	55	Inverse variance weighted	0.0433992	0.0159491	1.04435	1.01221	1.07752	0.00650624	148	Inverse variance weighted	-0.105831	0.00434594882452948	0.899576	0.830862	0.973973	0.00904085	-0.230789	0.0433992	-0.105831	-0.00459301	-0.226196	-0.0131111	0.00392505430332893	0.0199013317686456	0.0568097865909283	-0.0170071
13565_2_RBL2_p130	PSG1_P11464_OID20916_v1_Neurology	155	Inverse variance weighted	0.0677669	0.0228798	1.07012	1.02319	1.1192	0.00305781	152	Inverse variance weighted	-0.0141556	0.00488822	0.985944	0.976543	0.995436	0.00378118	151	Inverse variance weighted	-0.0945989	0.0038540669530389	0.909738	0.839928	0.985349	0.0202156	0.0677669	-0.0141556	-0.0945989	0.00133910445535972	0.0664278215446403	-0.00621487	0.00889307568331597	0.0197604426584101	-0.0917094	0.131230324410996
17224_12_OGN_MIME	LY75_O60449_OID20580_v1_Inflammation	173	Inverse variance weighted	0.115247	0.0206121	1.12215	1.07772	1.16841	2.25e-08	173	Inverse variance weighted	-0.0131815	0.00444785	0.986905	0.978339	0.995546	0.00304098	85	Inverse variance weighted	-0.172159	0.0105021499516247	0.841845	0.746976	0.948763	0.00476939	0.115247	-0.0131815	-0.172159	0.0022693168079569	0.112977696192043	-0.0183149	0.0228535307131413	0.019690894790973	-0.158919	0.198300416802484
6402_8_PILRA_PILRA_isoform_FDF03_deltaTM	KDM3A_Q9Y4C1_OID30426_v1_Inflammation_II	15	Inverse variance weighted	-0.482031	0.205717	0.617528	0.412617	0.9242	0.0191202	18	Inverse variance weighted	0.174222	0.0259446	1.19032	1.1313	1.25241	1.88e-11	545	Inverse variance weighted	-0.0544331	0.00459619019061041	0.947022	0.919045	0.97585	0.000373905	-0.482031	0.174222	-0.0544331	-0.00948343	-0.472547	-0.018492	-0.000474893	0.0196738994150802	0.0383626064433909	0.000985192386769425
3054_3_HP_Haptoglobin__Mixed_Type	ITIH4_Q14624_OID30762_v1_Inflammation_II	43	Inverse variance weighted	-0.161842	0.0737425	0.850576	0.736109	0.982842	0.0281859	43	Inverse variance weighted	0.0603869	0.0242948	1.06225	1.01285	1.11405	0.0129338	440	Inverse variance weighted	-0.0519834	0.0017932618556679	0.949345	0.913141	0.986984	0.00878166	-0.161842	0.0603869	-0.0519834	-0.00313912	-0.158703	-0.00665391	0.000375674610680313	0.0193962107231768	0.0411136666043911	-0.00232125
5660_51_SOD3_SOD3	ERBB4_Q15303_OID21510_v1_Oncology	81	Inverse variance weighted	-0.149598	0.0671358	0.861054	0.754889	0.98215	0.0258613	82	Inverse variance weighted	0.0541684	0.0208914	1.05566	1.01331	1.09979	0.00951809	182	Inverse variance weighted	-0.0535002	0.00179620030702611	0.947906	0.900683	0.997605	0.0401713	-0.149598	0.0541684	-0.0535002	-0.00289802	-0.1467	-0.00641858	0.000622527739675922	0.0193720987278659	0.0429055381645615	-0.00416134
13565_2_RBL2_p130	SH3BP1_Q9Y3L3_OID31439_v1_Oncology_II	25	Inverse variance weighted	0.37837	0.0910608	1.4599	1.22127	1.74516	3.25e-05	23	Inverse variance weighted	-0.0774703	0.0201446	0.925454	0.889626	0.962726	0.000120204	151	Inverse variance weighted	-0.0945989	0.00415746856828624	0.909738	0.839928	0.985349	0.0202156	0.37837	-0.0774703	-0.0945989	0.0073286036198692	0.371041142380131	-0.000820035	0.0154772420137102	0.0193688943086618	-0.00216728	0.0409050728218377
13565_2_RBL2_p130	NME3_Q13232_OID20789_v1_Inflammation	57	Inverse variance weighted	-0.230789	0.0760443	0.793907	0.683974	0.92151	0.00240594	55	Inverse variance weighted	0.0469764	0.0157378	1.0481	1.01626	1.08093	0.00283624	151	Inverse variance weighted	-0.0945989	0.00392372442547215	0.909738	0.839928	0.985349	0.0202156	-0.230789	0.0469764	-0.0945989	-0.00444392	-0.226345	-0.0121344	0.00324658456545443	0.0192553296465245	0.0525779966957173	-0.0140673
7738_299_STX2_STX2	LY75_O60449_OID20580_v1_Inflammation	173	Inverse variance weighted	0.115247	0.0206121	1.12215	1.07772	1.16841	2.25e-08	173	Inverse variance weighted	-0.0111307	0.00496405	0.988931	0.979356	0.9986	0.0249442	52	Inverse variance weighted	-0.198132	0.0145975712837197	0.820262	0.709968	0.94769	0.00716146	0.115247	-0.0111307	-0.198132	0.00220534533247072	0.113041667667529	-0.0264059	0.0308165850485614	0.0191358133721932	-0.229124	0.267395954536031
13565_2_RBL2_p130	LRRN1_Q6UXK5_OID20438_v1_Inflammation	103	Inverse variance weighted	0.0783139	0.0390483	1.08146	1.00178	1.16748	0.0449023	102	Inverse variance weighted	-0.0157811	0.00653926	0.984343	0.971807	0.99704	0.0158094	151	Inverse variance weighted	-0.0945989	0.00385482731358842	0.909738	0.839928	0.985349	0.0202156	0.0783139	-0.0157811	-0.0945989	0.00149287536227998	0.07682105863772	-0.00606259	0.00904833689691329	0.0190627042472414	-0.0774139	0.115539297220253
10916_44_PLA2R1_PLA2R	IGF2R_P11717_OID21146_v1_Neurology	99	Inverse variance weighted	0.0986377	0.0477835	1.10367	1.00499	1.21203	0.0389928	105	Inverse variance weighted	-0.0323963	0.0128691	0.968123	0.944009	0.992853	0.0118237	463	Inverse variance weighted	-0.0561399	0.00121341248771743	0.945407	0.908533	0.983778	0.00567913	0.0986377	-0.0323963	-0.0561399	0.00181872595369021	0.0968189360463098	-0.000559563	0.00419701442961637	0.0184384535968646	-0.00567291	0.0425498166168656
14254_27_PTPN4_PTN4	OGN_P20774_OID21123_v1_Neurology	87	Inverse variance weighted	-0.147658	0.0452421	0.862726	0.789518	0.942722	0.00109951	82	Inverse variance weighted	0.021404	0.00990425	1.02163	1.00199	1.04166	0.0306884	53	Inverse variance weighted	-0.126746	0.00698610416415981	0.880957	0.790785	0.981412	0.021416	-0.147658	0.021404	-0.126746	-0.00271287	-0.144946	-0.0164056	0.0109798898496255	0.0183726312785339	0.11110531189082	-0.07436
3181_50_CTSS_Cathepsin_S	PECR_Q9BY49_OID30228_v1_Cardiometabolic_II	19	Inverse variance weighted	0.296853	0.114612	1.34562	1.07488	1.68454	0.00959588	17	Inverse variance weighted	0.0444597	0.0216084	1.04546	1.00211	1.09069	0.0396362	63	Inverse variance weighted	0.121759	0.00760395020304877	1.12948	1.00034	1.2753	0.0493662	0.296853	0.0444597	0.121759	0.00541334640671606	0.291439560593284	-0.0094904	0.0203170888046917	0.0182357870819708	-0.03197	0.0684416029811413
14254_27_PTPN4_PTN4	ENTPD6_O75354_OID20100_v1_Cardiometabolic	105	Inverse variance weighted	-0.148172	0.0388169	0.862283	0.799113	0.930447	0.000134981	111	Inverse variance weighted	0.021159	0.00905312	1.02138	1.00342	1.03967	0.0194284	53	Inverse variance weighted	-0.126746	0.00698551392685469	0.880957	0.790785	0.981412	0.021416	-0.148172	0.021159	-0.126746	-0.00268183	-0.14549	-0.0163734	0.0110097810050341	0.0180994602468373	0.110503171388325	-0.0743043
12560_9_NT5C_NT5C	TCN2_P20062_OID20341_v1_Cardiometabolic	127	Inverse variance weighted	0.158633	0.0418706	1.17191	1.07957	1.27214	0.000151476	124	Inverse variance weighted	-0.0154484	0.00676179	0.98467	0.971706	0.997807	0.0223328	36	Inverse variance weighted	-0.185497	0.0106696749761953	0.830692	0.742131	0.92982	0.00125934	0.158633	-0.0154484	-0.185497	0.00286562368097465	0.155766991319025	-0.0180469	0.0237781866343174	0.0180645303046581	-0.113766	0.149894689905461
6402_8_PILRA_PILRA_isoform_FDF03_deltaTM	TSC1_Q92574_OID30478_v1_Inflammation_II	7	Inverse variance weighted	-0.535904	0.247104	0.58514	0.360513	0.949728	0.0301026	8	Inverse variance weighted	0.176765	0.0546212	1.19335	1.07219	1.3282	0.00121135	545	Inverse variance weighted	-0.0544331	0.00969095643408741	0.947022	0.919045	0.97585	0.000373905	-0.535904	0.176765	-0.0544331	-0.00962185	-0.526282	-0.0286161	0.0093724197027062	0.0179544339788109	0.0533978544764473	-0.017489
10816_150_PILRA_PILRA_isoform_FDF03_M14	BTN2A1_Q7KYR7_OID20713_v1_Inflammation	133	Inverse variance weighted	-0.145131	0.0390027	0.864909	0.801255	0.93362	0.000198394	143	Inverse variance weighted	0.0507561	0.00696877	1.05207	1.03779	1.06653	3.26e-13	533	Inverse variance weighted	-0.0503676	0.00085455283180872	0.95088	0.922526	0.980105	0.00110963	-0.145131	0.0507561	-0.0503676	-0.00255646	-0.142575	-0.00423139	-0.000881539	0.017614847416755	0.0291556080456457	0.00607408678786431
11308_8_CREB3L4_CR3L4	PSG1_P11464_OID20916_v1_Neurology	155	Inverse variance weighted	0.0677669	0.0228798	1.07012	1.02319	1.1192	0.00305781	152	Inverse variance weighted	-0.0143272	0.00488983	0.985775	0.976372	0.995268	0.00338952	110	Inverse variance weighted	-0.0823278	0.00338558858467279	0.92097	0.849666	0.998258	0.0452412	0.0677669	-0.0143272	-0.0823278	0.0011795302209082	0.0665873957790918	-0.00545622	0.00781528384686686	0.0174056916925552	-0.0805145	0.115326
5660_51_SOD3_SOD3	CCL21_O00585_OID20686_v1_Inflammation	52	Inverse variance weighted	-0.245225	0.0979352	0.782528	0.645856	0.948122	0.0122814	50	Inverse variance weighted	0.0779261	0.0293314	1.08104	1.02065	1.14501	0.00788992	182	Inverse variance weighted	-0.0535002	0.00267769292785682	0.947906	0.900683	0.997605	0.0401713	-0.245225	0.0779261	-0.0535002	-0.00416906	-0.241056	-0.00941734	0.00107921423891481	0.0170009639455271	0.0384028396560859	-0.00440091
4430_44_COLEC11_Collectin_Kidney_1	ITGBL1_O95965_OID30408_v1_Cardiometabolic_II	76	Inverse variance weighted	-0.111669	0.0486193	0.894341	0.81305	0.983759	0.0216305	80	Inverse variance weighted	0.0287928	0.0126273	1.02921	1.00405	1.055	0.0225963	197	Inverse variance weighted	-0.0649238	0.00173609607708352	0.937139	0.890321	0.986418	0.0130289	-0.111669	0.0287928	-0.0649238	-0.00186934	-0.109799	-0.00527208	0.00153341329482233	0.0167400321460389	0.0472118927900148	-0.0137318
9177_6_FAM3B_FAM3B	TCN2_P20062_OID20341_v1_Cardiometabolic	127	Inverse variance weighted	0.158633	0.0418706	1.17191	1.07957	1.27214	0.000151476	124	Inverse variance weighted	-0.0230959	0.00713181	0.977169	0.963605	0.990924	0.00120188	89	Inverse variance weighted	-0.113441	0.00602592225790869	0.892757	0.804515	0.990679	0.0326493	0.158633	-0.0230959	-0.113441	0.00262001162661975	0.15601260337338	-0.0091908	0.0144308192521208	0.0165162228878327	-0.0579376	0.0909700647128636
19361_78_MATN3_MATN3	RTN4R_Q9BZR6_OID21424_v1_Oncology	65	Inverse variance weighted	0.166198	0.0544379	1.18081	1.06131	1.31376	0.00226572	63	Inverse variance weighted	-0.0522017	0.0125587	0.949137	0.92606	0.97279	3.23e-05	296	Inverse variance weighted	-0.0522868	0.00141446333067235	0.949057	0.905498	0.99471	0.0291642	0.166198	-0.0522017	-0.0522868	0.00272945796736298	0.163468866032637	-4.28902e-05	0.00550180609548079	0.0164228970646116	-0.000258066	0.033103860274071
10574_10_AXL_AXL	GGH_Q92820_OID20416_v1_Cardiometabolic	116	Inverse variance weighted	0.168732	0.0409451	1.1838	1.09251	1.28272	3.77e-05	113	Inverse variance weighted	-0.025459	0.00914906	0.974862	0.957537	0.992501	0.0053911	148	Inverse variance weighted	-0.105831	0.00429679137439506	0.899576	0.830862	0.973973	0.00904085	0.168732	-0.025459	-0.105831	0.00269436106792314	0.166037300932077	-0.00572735	0.0111160721617375	0.0159683193775638	-0.0339435	0.0658801793923979
10916_44_PLA2R1_PLA2R	ALDH5A1_P51649_OID31047_v1_Neurology_II	11	Inverse variance weighted	0.446237	0.160841	1.56242	1.13995	2.14146	0.0055305	13	Inverse variance weighted	-0.12393	0.0448869	0.883441	0.809039	0.964687	0.00576344	463	Inverse variance weighted	-0.0561399	0.00567835987203767	0.945407	0.908533	0.983778	0.00567913	0.446237	-0.12393	-0.0561399	0.00695743264592076	0.439279700354079	-0.00417215	0.0180870179951146	0.0155913350355824	-0.00934963	0.0405323014548738
11308_8_CREB3L4_CR3L4	OGN_P20774_OID21123_v1_Neurology	87	Inverse variance weighted	-0.147658	0.0452421	0.862726	0.789518	0.942722	0.00109951	82	Inverse variance weighted	0.0277037	0.011624	1.02809	1.00493	1.05178	0.0171573	110	Inverse variance weighted	-0.0823278	0.00340014756084738	0.92097	0.849666	0.998258	0.0452412	-0.147658	0.0277037	-0.0823278	-0.00228078	-0.145378	-0.00894507	0.00438350663073309	0.0154463394556068	0.060579476664222	-0.0296868
10916_44_PLA2R1_PLA2R	TMPRSS5_Q9H3S3_OID20947_v1_Neurology	131	Inverse variance weighted	-0.109767	0.0340903	0.896043	0.838128	0.957959	0.00128243	126	Inverse variance weighted	0.0297775	0.00662871	1.03023	1.01693	1.0437	7.05e-06	463	Inverse variance weighted	-0.0561399	0.0011565098458737	0.945407	0.908533	0.983778	0.00567913	-0.109767	0.0297775	-0.0561399	-0.00167171	-0.108095	-0.00393847	0.000595051489584643	0.0152296208166254	0.0358802898018343	-0.00542105
7905_30_HP_HPT	LTB_Q06643_OID31383_v1_Oncology_II	65	Inverse variance weighted	0.203691	0.0727948	1.22592	1.06291	1.41392	0.00513951	77	Inverse variance weighted	-0.044557	0.0195626	0.956421	0.920443	0.993805	0.0227471	397	Inverse variance weighted	-0.069507	0.00171385388746293	0.932854	0.894833	0.97249	0.00106043	0.203691	-0.044557	-0.069507	0.00309702102865324	0.200594395971347	-0.000262133	0.00645617464808059	0.0152044748584239	-0.00128691	0.0316958600571795
10851_77_EBI3_IL27B	CD27_P26842_OID21527_v1_Oncology	42	Inverse variance weighted	0.179611	0.0807451	1.19675	1.02158	1.40196	0.02612	44	Inverse variance weighted	0.0561173	0.0225293	1.05772	1.01203	1.10547	0.0127435	314	Inverse variance weighted	0.0481619	0.00167615758880051	1.04934	1.00338	1.0974	0.0350521	0.179611	0.0561173	0.0481619	0.00270271920735932	0.176908537792641	-0.00058255	0.00598798808140832	0.0150476047687775	-0.00324339	0.0333386012737961
4430_44_COLEC11_Collectin_Kidney_1	C1RL_Q9NZP8_OID30721_v1_Inflammation_II	56	Inverse variance weighted	-0.112481	0.057157	0.893614	0.798908	0.999547	0.0490756	51	Inverse variance weighted	0.0254273	0.0127494	1.02575	1.00044	1.05171	0.0461089	197	Inverse variance weighted	-0.0649238	0.00172827562739233	0.937139	0.890321	0.986418	0.0130289	-0.112481	0.0254273	-0.0649238	-0.00165084	-0.11083	-0.00503826	0.00173658218895539	0.0146765613589	0.0447919812987732	-0.0154389
16900_29_MDGA1_MDGA1	ERBB4_Q15303_OID21510_v1_Oncology	81	Inverse variance weighted	-0.149598	0.0671358	0.861054	0.754889	0.98215	0.0258613	82	Inverse variance weighted	0.0610768	0.0193167	1.06298	1.02349	1.104	0.00156767	483	Inverse variance weighted	-0.0356158	0.0013107115469597	0.965011	0.935159	0.995815	0.0263123	-0.149598	0.0610768	-0.0356158	-0.0021753	-0.147423	-0.0047443	0.000393694036846884	0.014540985636134	0.0317136532326691	-0.00263168
10851_77_EBI3_IL27B	LTB_Q06643_OID31383_v1_Oncology_II	65	Inverse variance weighted	0.203691	0.0727948	1.22592	1.06291	1.41392	0.00513951	77	Inverse variance weighted	0.0612656	0.0168418	1.06318	1.02866	1.09886	0.000275066	314	Inverse variance weighted	0.0481619	0.00150855571364954	1.04934	1.00338	1.0974	0.0350521	0.203691	0.0612656	0.0481619	0.0029506684436414	0.200740748556359	-6.10076e-06	0.0059074376423945	0.014485973376293	-2.9951e-05	0.0290018977205824
3054_3_HP_Haptoglobin__Mixed_Type	CSF2_P04141_OID30072_v1_Cardiometabolic_II	24	Inverse variance weighted	0.218389	0.103953	1.24407	1.01475	1.52522	0.0356554	23	Inverse variance weighted	-0.0593122	0.0289314	0.942412	0.890459	0.997397	0.0403545	440	Inverse variance weighted	-0.0519834	0.00200200753170128	0.949345	0.913141	0.986984	0.00878166	0.218389	-0.0593122	-0.0519834	0.00308325194743615	0.215305557052564	-0.000840683	0.00700718670957065	0.0141181773990816	-0.00384948	0.0320858323357158
3054_3_HP_Haptoglobin__Mixed_Type	GLB1_P16278_OID20949_v1_Neurology	63	Inverse variance weighted	0.138124	0.0590407	1.14812	1.02266	1.28897	0.0193113	62	Inverse variance weighted	-0.035148	0.0167508	0.965463	0.93428	0.997686	0.0358803	440	Inverse variance weighted	-0.0519834	0.00118746401021723	0.949345	0.913141	0.986984	0.00878166	0.138124	-0.035148	-0.0519834	0.0018271107999852	0.136296552200015	-0.000500319	0.00415454026001096	0.013228079536127	-0.00362225	0.0300784106776184
10816_150_PILRA_PILRA_isoform_FDF03_M14	TSC1_Q92574_OID30478_v1_Inflammation_II	7	Inverse variance weighted	-0.535904	0.247104	0.58514	0.360513	0.949728	0.0301026	8	Inverse variance weighted	0.137564	0.0414545	1.14748	1.05793	1.2446	0.000905257	533	Inverse variance weighted	-0.0503676	0.00575546339804551	0.95088	0.922526	0.980105	0.00110963	-0.535904	0.137564	-0.0503676	-0.00692876	-0.528975	-0.0182095	0.00435194522980057	0.0129291097789042	0.0339789732018938	-0.00812075
19361_78_MATN3_MATN3	ALDH5A1_P51649_OID31047_v1_Neurology_II	11	Inverse variance weighted	0.446237	0.160841	1.56242	1.13995	2.14146	0.0055305	13	Inverse variance weighted	-0.109439	0.0308663	0.896336	0.843718	0.952237	0.000391735	296	Inverse variance weighted	-0.0522868	0.00360302104592168	0.949057	0.905498	0.99471	0.0291642	0.446237	-0.109439	-0.0522868	0.00572223333622178	0.440514899663778	-0.00133969	0.0127841545862283	0.0128233015879962	-0.00300219	0.028648791507515
19361_78_MATN3_MATN3	ERBB4_Q15303_OID21510_v1_Oncology	81	Inverse variance weighted	-0.149598	0.0671358	0.861054	0.754889	0.98215	0.0258613	82	Inverse variance weighted	0.0365687	0.0185598	1.03725	1.00019	1.07567	0.0488024	296	Inverse variance weighted	-0.0522868	0.00142532811915649	0.949057	0.905498	0.99471	0.0291642	-0.149598	0.0365687	-0.0522868	-0.00191206	-0.147686	-0.0047057	0.000881584508905836	0.0127813217019086	0.0314556715716755	-0.00589303
10816_150_PILRA_PILRA_isoform_FDF03_M14	KDM3A_Q9Y4C1_OID30426_v1_Inflammation_II	15	Inverse variance weighted	-0.482031	0.205717	0.617528	0.412617	0.9242	0.0191202	18	Inverse variance weighted	0.122068	0.0261746	1.12983	1.07333	1.18931	3.11e-06	533	Inverse variance weighted	-0.0503676	0.00328842135444984	0.95088	0.922526	0.980105	0.00110963	-0.482031	0.122068	-0.0503676	-0.00614828	-0.475883	-0.0125936	0.000297030231152273	0.0127549429797236	0.0261260918509134	-0.000616206
7905_30_HP_HPT	ALDH5A1_P51649_OID31047_v1_Neurology_II	11	Inverse variance weighted	0.446237	0.160841	1.56242	1.13995	2.14146	0.0055305	13	Inverse variance weighted	-0.0796698	0.0300957	0.923421	0.870526	0.97953	0.0081158	397	Inverse variance weighted	-0.069507	0.00281541610983268	0.932854	0.894833	0.97249	0.00106043	0.446237	-0.0796698	-0.069507	0.00553760736270592	0.440699525637294	1.93917874338687e-05	0.011055822937978	0.0124095619866443	4.3456238846597e-05	0.0247756677344419
16900_29_MDGA1_MDGA1	DPP6_P42658_OID21354_v1_Oncology	45	Inverse variance weighted	-0.213294	0.0793609	0.807918	0.691535	0.943889	0.00719566	46	Inverse variance weighted	0.0742859	0.0338349	1.07711	1.008	1.15097	0.0281248	483	Inverse variance weighted	-0.0356158	0.00257749327248107	0.965011	0.935159	0.995815	0.0263123	-0.213294	0.0742859	-0.0356158	-0.00264575	-0.210649	-0.00769764	0.00240613387230725	0.0124042326638654	0.0360892784004363	-0.0112808
10851_77_EBI3_IL27B	PECR_Q9BY49_OID30228_v1_Cardiometabolic_II	19	Inverse variance weighted	0.296853	0.114612	1.34562	1.07488	1.68454	0.00959588	17	Inverse variance weighted	0.0764278	0.019288	1.07942	1.03938	1.12101	7.42e-05	314	Inverse variance weighted	0.0481619	0.00183961162343226	1.04934	1.00338	1.0974	0.0350521	0.296853	0.0764278	0.0481619	0.00368091319726528	0.293171993802735	7.52744153380575e-05	0.0072865519791925	0.0123997882805482	0.000253574796011876	0.0245460017650846
7905_30_HP_HPT	LIPF_P07098_OID30266_v1_Cardiometabolic_II	57	Inverse variance weighted	-0.146122	0.0619149	0.864052	0.765309	0.975535	0.0182726	61	Inverse variance weighted	0.0260265	0.0121047	1.02637	1.0023	1.05101	0.0315456	397	Inverse variance weighted	-0.069507	0.00150889722016484	0.932854	0.894833	0.97249	0.00106043	-0.146122	0.0260265	-0.069507	-0.00180903	-0.144313	-0.00476647	0.00114841097624981	0.0123802386732195	0.032619728457506	-0.00785925
3054_3_HP_Haptoglobin__Mixed_Type	LTB_Q06643_OID31383_v1_Oncology_II	65	Inverse variance weighted	0.203691	0.0727948	1.22592	1.06291	1.41392	0.00513951	77	Inverse variance weighted	-0.0482465	0.0189561	0.952899	0.918145	0.988969	0.0109224	440	Inverse variance weighted	-0.0519834	0.001378355524249	0.949345	0.913141	0.986984	0.00878166	0.203691	-0.0482465	-0.0519834	0.00250801684784955	0.20118340015215	-0.00019356	0.00520959367537759	0.0123128253747164	-0.000950261	0.0255759116024883
5660_51_SOD3_SOD3	RTN4R_Q9BZR6_OID21424_v1_Oncology	65	Inverse variance weighted	0.166198	0.0544379	1.18081	1.06131	1.31376	0.00226572	63	Inverse variance weighted	-0.0380179	0.0113729	0.962696	0.941474	0.984396	0.00082925	182	Inverse variance weighted	-0.0535002	0.00146035779315364	0.947906	0.900683	0.997605	0.0401713	0.166198	-0.0380179	-0.0535002	0.00203396638431197	0.164164357615688	-0.000828335	0.0048962676588931	0.0122381883003343	-0.00498401	0.0294603913027011
4430_44_COLEC11_Collectin_Kidney_1	CRELD2_Q6UXH1_OID20751_v1_Inflammation	73	Inverse variance weighted	-0.154382	0.0591511	0.856944	0.763136	0.962283	0.00905502	71	Inverse variance weighted	0.0290238	0.0121062	1.02945	1.00531	1.05417	0.0165102	197	Inverse variance weighted	-0.0649238	0.00173358044111653	0.937139	0.890321	0.986418	0.0130289	-0.154382	0.0290238	-0.0649238	-0.00188434	-0.152498	-0.00528215	0.00151348200318178	0.0122056313449256	0.0342147195560375	-0.00980346
6402_8_PILRA_PILRA_isoform_FDF03_deltaTM	PI16_Q6UXB8_OID30676_v1_Inflammation_II	76	Inverse variance weighted	-0.111142	0.055674	0.894812	0.802308	0.997981	0.0459018	76	Inverse variance weighted	0.0239146	0.00856896	1.0242	1.00714	1.04155	0.00525707	545	Inverse variance weighted	-0.0544331	0.000857637412784373	0.947022	0.919045	0.97585	0.000373905	-0.111142	0.0239146	-0.0544331	-0.00130175	-0.10984	-0.00298272	0.000379222446048504	0.0117124899089144	0.0268370402810047	-0.00341206
10816_150_PILRA_PILRA_isoform_FDF03_M14	PDIA5_Q14554_OID31209_v1_Oncology_II	81	Inverse variance weighted	-0.132765	0.0559546	0.875671	0.784714	0.977171	0.0176574	96	Inverse variance weighted	0.0306739	0.0117285	1.03115	1.00772	1.05513	0.00891396	533	Inverse variance weighted	-0.0503676	0.000857074417915442	0.95088	0.922526	0.980105	0.00110963	-0.132765	0.0306739	-0.0503676	-0.00154497	-0.13122	-0.00322483	0.000134897463630473	0.0116368722032949	0.0242898069677432	-0.00101606
5660_51_SOD3_SOD3	ADAM23_O75077_OID20651_v1_Inflammation	108	Inverse variance weighted	-0.0661019	0.0288822	0.936035	0.884519	0.990552	0.0220985	104	Inverse variance weighted	0.014353	0.00672677	1.01446	1.00117	1.02792	0.0328667	182	Inverse variance weighted	-0.0535002	0.00139821987887748	0.947906	0.900683	0.997605	0.0401713	-0.0661019	0.014353	-0.0535002	-0.000767887	-0.065334	-0.0035084	0.00197262382253505	0.0116167139108509	0.0530755822276015	-0.0298422
10916_44_PLA2R1_PLA2R	TSC1_Q92574_OID30478_v1_Inflammation_II	7	Inverse variance weighted	-0.535904	0.247104	0.58514	0.360513	0.949728	0.0301026	8	Inverse variance weighted	0.110077	0.0407346	1.11636	1.0307	1.20915	0.0068865	463	Inverse variance weighted	-0.0561399	0.00462646327295762	0.945407	0.908533	0.983778	0.00567913	-0.535904	0.110077	-0.0561399	-0.00617969	-0.529724	-0.0152476	0.00288818008126664	0.0115313315442278	0.0284520229450812	-0.00538936
10851_77_EBI3_IL27B	ICAM3_P32942_OID20277_v1_Cardiometabolic	168	Inverse variance weighted	0.171889	0.0444226	1.18755	1.08852	1.29558	0.000109099	181	Inverse variance weighted	0.0407428	0.0129844	1.04158	1.01541	1.06843	0.00170202	314	Inverse variance weighted	0.0481619	0.00122104418546326	1.04934	1.00338	1.0974	0.0350521	0.171889	0.0407428	0.0481619	0.00196225150360264	0.169926975496397	-0.000430995	0.00435549810711063	0.0114157910757411	-0.0025074	0.0253389824547331
14254_27_PTPN4_PTN4	TCN2_P20062_OID20341_v1_Cardiometabolic	127	Inverse variance weighted	0.158633	0.0418706	1.17191	1.07957	1.27214	0.000151476	124	Inverse variance weighted	-0.013668	0.00695869	0.986425	0.973062	0.999971	0.0495118	53	Inverse variance weighted	-0.126746	0.0069835347498704	0.880957	0.790785	0.981412	0.021416	0.158633	-0.013668	-0.126746	0.00173236248252799	0.156900252517472	-0.0119554	0.015420090592274	0.0109205946237978	-0.0753651	0.0972063064854221
10851_77_EBI3_IL27B	PKN3_Q6P5Z2_OID31311_v1_Oncology_II	7	Inverse variance weighted	-0.511181	0.186426	0.599787	0.416205	0.864343	0.00610655	7	Inverse variance weighted	-0.115403	0.0324312	0.891007	0.836132	0.949482	0.000373108	314	Inverse variance weighted	0.0481619	0.00390110576101871	1.04934	1.00338	1.0974	0.0350521	-0.511181	-0.115403	0.0481619	-0.00555805	-0.505623	-0.0132042	0.00208811793861486	0.010872952246122	0.0258307920470207	-0.00408489
5660_51_SOD3_SOD3	RGMA_Q96B86_OID21065_v1_Neurology	100	Inverse variance weighted	-0.164841	0.0470679	0.848029	0.773296	0.929984	0.000461451	100	Inverse variance weighted	0.0332577	0.0145042	1.03382	1.00484	1.06363	0.0218491	182	Inverse variance weighted	-0.0535002	0.00147593458799247	0.947906	0.900683	0.997605	0.0401713	-0.164841	0.0332577	-0.0535002	-0.0017793	-0.163061	-0.00467213	0.00111353506185159	0.010794044184622	0.0283433116279338	-0.00675522
7905_30_HP_HPT	GGH_Q92820_OID20416_v1_Cardiometabolic	116	Inverse variance weighted	0.168732	0.0409451	1.1838	1.09251	1.28272	3.77e-05	113	Inverse variance weighted	-0.0258749	0.0126985	0.974457	0.950503	0.999015	0.041587	397	Inverse variance weighted	-0.069507	0.00151177982115778	0.932854	0.894833	0.97249	0.00106043	0.168732	-0.0258749	-0.069507	0.00179848405586455	0.166933177944135	-0.0011646	0.00476157250533381	0.0106588415863796	-0.00690211	0.0282197925919429
4430_44_COLEC11_Collectin_Kidney_1	TCN2_P20062_OID20341_v1_Cardiometabolic	127	Inverse variance weighted	0.158633	0.0418706	1.17191	1.07957	1.27214	0.000151476	124	Inverse variance weighted	-0.0255387	0.00714438	0.974785	0.96123	0.988531	0.000350687	197	Inverse variance weighted	-0.0649238	0.00170737612654987	0.937139	0.890321	0.986418	0.0130289	0.158633	-0.0255387	-0.0649238	0.00165807016306775	0.156974544836932	-0.00168839	0.00500452737110548	0.0104522652108316	-0.0106434	0.0315479094327827
5660_51_SOD3_SOD3	MIA_Q16674_OID21531_v1_Oncology	92	Inverse variance weighted	-0.109323	0.0345502	0.896441	0.837745	0.95925	0.0015553	85	Inverse variance weighted	0.0209586	0.0100103	1.02118	1.00134	1.04141	0.036287	182	Inverse variance weighted	-0.0535002	0.00141057230116994	0.947906	0.900683	0.997605	0.0401713	-0.109323	0.0209586	-0.0535002	-0.00112129	-0.108201	-0.00388601	0.00164343134526952	0.0102567204737971	0.0355463141908701	-0.0150329
19361_78_MATN3_MATN3	MIA_Q16674_OID21531_v1_Oncology	92	Inverse variance weighted	-0.109323	0.0345502	0.896441	0.837745	0.95925	0.0015553	85	Inverse variance weighted	0.02135	0.00938298	1.02158	1.00296	1.04054	0.0228823	296	Inverse variance weighted	-0.0522868	0.00126926977024674	0.949057	0.905498	0.99471	0.0291642	-0.109323	0.02135	-0.0522868	-0.00111632	-0.108206	-0.00360409	0.00137144741060299	0.0102112675637271	0.0329675040078138	-0.012545
19361_78_MATN3_MATN3	TMPRSS5_Q9H3S3_OID20947_v1_Neurology	131	Inverse variance weighted	-0.109767	0.0340903	0.896043	0.838128	0.957959	0.00128243	126	Inverse variance weighted	0.0200821	0.00770191	1.02029	1.005	1.0358	0.00912275	296	Inverse variance weighted	-0.0522868	0.00126286897991815	0.949057	0.905498	0.99471	0.0291642	-0.109767	0.0200821	-0.0522868	-0.00105003	-0.108717	-0.00352525	0.00142519495641208	0.00956598511215178	0.0321158054781655	-0.0129838
5660_51_SOD3_SOD3	TMPRSS5_Q9H3S3_OID20947_v1_Neurology	131	Inverse variance weighted	-0.109767	0.0340903	0.896043	0.838128	0.957959	0.00128243	126	Inverse variance weighted	0.0192676	0.00868859	1.01945	1.00224	1.03696	0.0265839	182	Inverse variance weighted	-0.0535002	0.00140489239238411	0.947906	0.900683	0.997605	0.0401713	-0.109767	0.0192676	-0.0535002	-0.00103082	-0.108736	-0.00378441	0.00172276800608198	0.00939100370622645	0.0344767977083043	-0.0156948
19361_78_MATN3_MATN3	LTB_Q06643_OID31383_v1_Oncology_II	65	Inverse variance weighted	0.203691	0.0727948	1.22592	1.06291	1.41392	0.00513951	77	Inverse variance weighted	-0.0364742	0.0145182	0.964183	0.937133	0.992014	0.0119943	296	Inverse variance weighted	-0.0522868	0.00136063440967157	0.949057	0.905498	0.99471	0.0291642	0.203691	-0.0364742	-0.0522868	0.00190711692924885	0.201784300070751	-0.000759727	0.00457396037220512	0.00936277511019941	-0.00372979	0.0224553417103732
3054_3_HP_Haptoglobin__Mixed_Type	ALDH5A1_P51649_OID31047_v1_Neurology_II	11	Inverse variance weighted	0.446237	0.160841	1.56242	1.13995	2.14146	0.0055305	13	Inverse variance weighted	-0.0718087	0.0295264	0.930709	0.878376	0.98616	0.015015	440	Inverse variance weighted	-0.0519834	0.00235773479468445	0.949345	0.913141	0.986984	0.00878166	0.446237	-0.0718087	-0.0519834	0.00373286283643739	0.442504270163563	-0.000888297	0.00835402303401891	0.00836519993605595	-0.00199064	0.0187210395913397
3054_3_HP_Haptoglobin__Mixed_Type	GGH_Q92820_OID20416_v1_Cardiometabolic	116	Inverse variance weighted	0.168732	0.0409451	1.1838	1.09251	1.28272	3.77e-05	113	Inverse variance weighted	-0.0271035	0.0125231	0.973261	0.949662	0.997445	0.0304424	440	Inverse variance weighted	-0.0519834	0.00108565200950108	0.949345	0.913141	0.986984	0.00878166	0.168732	-0.0271035	-0.0519834	0.00140893147366413	0.167322730526336	-0.000718946	0.00353680941228625	0.00835013095327736	-0.00426089	0.0209611484315626
6402_8_PILRA_PILRA_isoform_FDF03_deltaTM	PKD1_P98161_OID30328_v1_Cardiometabolic_II	61	Inverse variance weighted	-0.161238	0.0676922	0.851089	0.74534	0.971843	0.0172221	55	Inverse variance weighted	0.024065	0.0117479	1.02436	1.00104	1.04822	0.0405164	545	Inverse variance weighted	-0.0544331	0.000879474416285621	0.947022	0.919045	0.97585	0.000373905	-0.161238	0.024065	-0.0544331	-0.00130993	-0.159928	-0.0030337	0.000413839176914923	0.00812419582643367	0.0188150240463166	-0.00256663
19361_78_MATN3_MATN3	BTN2A1_Q7KYR7_OID20713_v1_Inflammation	133	Inverse variance weighted	-0.145131	0.0390027	0.864909	0.801255	0.93362	0.000198394	143	Inverse variance weighted	0.0216538	0.00885922	1.02189	1.0043	1.03979	0.0145169	296	Inverse variance weighted	-0.0522868	0.00126795745462163	0.949057	0.905498	0.99471	0.0291642	-0.145131	0.0216538	-0.0522868	-0.00113221	-0.143999	-0.0036174	0.00135298856283533	0.00780127669943734	0.024925078677173	-0.00932253
10916_44_PLA2R1_PLA2R	PSG1_P11464_OID20916_v1_Neurology	155	Inverse variance weighted	0.0677669	0.0228798	1.07012	1.02319	1.1192	0.00305781	152	Inverse variance weighted	-0.00941285	0.00405866	0.990631	0.982782	0.998543	0.020384	463	Inverse variance weighted	-0.0561399	0.00114018114159804	0.945407	0.908533	0.983778	0.00567913	0.0677669	-0.00941285	-0.0561399	0.000528436720600432	0.0672384892793996	-0.00170632	0.00276319175813258	0.00779785585376016	-0.0251792	0.0407749313895776
5660_51_SOD3_SOD3	PSG1_P11464_OID20916_v1_Neurology	155	Inverse variance weighted	0.0677669	0.0228798	1.07012	1.02319	1.1192	0.00305781	152	Inverse variance weighted	-0.00984748	0.00486261	0.990201	0.980808	0.999683	0.0428528	182	Inverse variance weighted	-0.0535002	0.00139570413054939	0.947906	0.900683	0.997605	0.0401713	0.0677669	-0.00984748	-0.0535002	0.000526842767243644	0.0672400832327564	-0.00220874	0.00326242286312045	0.00777433474322923	-0.0325931	0.0481418157158324
10816_150_PILRA_PILRA_isoform_FDF03_M14	PI16_Q6UXB8_OID30676_v1_Inflammation_II	76	Inverse variance weighted	-0.111142	0.055674	0.894812	0.802308	0.997981	0.0459018	76	Inverse variance weighted	0.0171482	0.0084737	1.0173	1.00054	1.03433	0.0430013	533	Inverse variance weighted	-0.0503676	0.000791369797398993	0.95088	0.922526	0.980105	0.00110963	-0.111142	0.0171482	-0.0503676	-0.000863714	-0.110278	-0.0024148	0.000687370690575903	0.00777128254106047	0.021727194661141	-0.00618463
7905_30_HP_HPT	TCN2_P20062_OID20341_v1_Cardiometabolic	127	Inverse variance weighted	0.158633	0.0418706	1.17191	1.07957	1.27214	0.000151476	124	Inverse variance weighted	-0.0175226	0.00826843	0.98263	0.966834	0.998684	0.0340716	397	Inverse variance weighted	-0.069507	0.00148273739108752	0.932854	0.894833	0.97249	0.00106043	0.158633	-0.0175226	-0.069507	0.00121794664488593	0.157414668355114	-0.00168822	0.00412411193141747	0.007677782055638	-0.0106423	0.0259978815290756
10851_77_EBI3_IL27B	PDLIM7_Q9NR12_OID20729_v1_Inflammation	6	Inverse variance weighted	-0.666372	0.299942	0.513569	0.285287	0.924516	0.0263059	6	Inverse variance weighted	-0.10613	0.0538785	0.899308	0.809182	0.999472	0.0488618	314	Inverse variance weighted	0.0481619	0.00582304311013571	1.04934	1.00338	1.0974	0.0350521	-0.666372	-0.10613	0.0481619	-0.00511141	-0.66126	-0.0165246	0.00630175483338122	0.00767051061230074	0.0247978404813993	-0.00945682
10851_77_EBI3_IL27B	SLMAP_Q14BN4_OID31441_v1_Oncology_II	4	Inverse variance weighted	-1.26651	0.364859	0.281812	0.137843	0.576148	0.00051806	4	Inverse variance weighted	-0.193441	0.0773238	0.824118	0.708223	0.958979	0.0123598	314	Inverse variance weighted	0.0481619	0.0149980272139482	1.04934	1.00338	1.0974	0.0350521	-1.26651	-0.193441	0.0481619	-0.0093165	-1.2572	-0.0387126	0.0200796367088194	0.00735601043021236	0.0305662655322999	-0.0158542
19361_78_MATN3_MATN3	TSC1_Q92574_OID30478_v1_Inflammation_II	7	Inverse variance weighted	-0.535904	0.247104	0.58514	0.360513	0.949728	0.0301026	8	Inverse variance weighted	0.0748179	0.0381493	1.07769	1.00005	1.16136	0.049857	296	Inverse variance weighted	-0.0522868	0.00311731369328124	0.949057	0.905498	0.99471	0.0291642	-0.535904	0.0748179	-0.0522868	-0.00391199	-0.531992	-0.0100219	0.00219794808327196	0.00729978872052062	0.018700960607474	-0.00410138
10916_44_PLA2R1_PLA2R	TCN2_P20062_OID20341_v1_Cardiometabolic	127	Inverse variance weighted	0.158633	0.0418706	1.17191	1.07957	1.27214	0.000151476	124	Inverse variance weighted	-0.0199387	0.00620868	0.980259	0.968402	0.99226	0.0013208	463	Inverse variance weighted	-0.0561399	0.00114624527013032	0.945407	0.908533	0.983778	0.00567913	0.158633	-0.0199387	-0.0561399	0.0011193566063097	0.15751325839369	-0.00112728	0.00336599733576513	0.0070562828855195	-0.00710626	0.0212188227229636
10916_44_PLA2R1_PLA2R	BTN2A1_Q7KYR7_OID20713_v1_Inflammation	133	Inverse variance weighted	-0.145131	0.0390027	0.864909	0.801255	0.93362	0.000198394	143	Inverse variance weighted	0.0162619	0.0078915	1.01639	1.00079	1.03224	0.0393326	463	Inverse variance weighted	-0.0561399	0.00114674426631255	0.945407	0.908533	0.983778	0.00567913	-0.145131	0.0162619	-0.0561399	-0.000912944	-0.144218	-0.00316056	0.00133467470409572	0.00629047745931706	0.0217772918345672	-0.00919634
6402_8_PILRA_PILRA_isoform_FDF03_deltaTM	ENTPD6_O75354_OID20100_v1_Cardiometabolic	105	Inverse variance weighted	-0.148172	0.0388169	0.862283	0.799113	0.930447	0.000134981	111	Inverse variance weighted	0.0157941	0.00535231	1.01592	1.00532	1.02663	0.00316864	545	Inverse variance weighted	-0.0544331	0.000837074951037833	0.947022	0.919045	0.97585	0.000373905	-0.148172	0.0157941	-0.0544331	-0.00085972	-0.147312	-0.00250039	0.000780946957971402	0.00580219048336869	0.0168749379990697	-0.00527056
6402_8_PILRA_PILRA_isoform_FDF03_deltaTM	LY75_O60449_OID20580_v1_Inflammation	173	Inverse variance weighted	0.115247	0.0206121	1.12215	1.07772	1.16841	2.25e-08	173	Inverse variance weighted	-0.0110748	0.00407519	0.988986	0.981118	0.996917	0.00657549	545	Inverse variance weighted	-0.0544331	0.000834017515411136	0.947022	0.919045	0.97585	0.000373905	0.115247	-0.0110748	-0.0544331	0.000602834505663342	0.114644178494337	-0.00103184	0.00223750883586917	0.00523080373166237	-0.00895329	0.0194148965567478
10816_150_PILRA_PILRA_isoform_FDF03_M14	ENTPD6_O75354_OID20100_v1_Cardiometabolic	105	Inverse variance weighted	-0.148172	0.0388169	0.862283	0.799113	0.930447	0.000134981	111	Inverse variance weighted	0.0135448	0.00541111	1.01364	1.00294	1.02444	0.0123094	533	Inverse variance weighted	-0.0503676	0.000781359885248635	0.95088	0.922526	0.980105	0.00110963	-0.148172	0.0135448	-0.0503676	-0.00068222	-0.147489	-0.00221368	0.000849245847377402	0.00460425243054426	0.0149400063765063	-0.0057315
16900_29_MDGA1_MDGA1	TCN2_P20062_OID20341_v1_Cardiometabolic	127	Inverse variance weighted	0.158633	0.0418706	1.17191	1.07957	1.27214	0.000151476	124	Inverse variance weighted	-0.0160185	0.00617671	0.984109	0.972267	0.996095	0.00950392	483	Inverse variance weighted	-0.0356158	0.000579496058975741	0.965011	0.935159	0.995815	0.0263123	0.158633	-0.0160185	-0.0356158	0.000570513511941492	0.158062101488059	-0.000565299	0.00170632578753395	0.00359644523253615	-0.00356357	0.0107564625820103
10816_150_PILRA_PILRA_isoform_FDF03_M14	SLMAP_Q14BN4_OID31441_v1_Oncology_II	4	Inverse variance weighted	-1.26651	0.364859	0.281812	0.137843	0.576148	0.00051806	4	Inverse variance weighted	-0.114719	0.0559064	0.891616	0.799079	0.99487	0.0401707	533	Inverse variance weighted	-0.0503676	0.00646055199937278	0.95088	0.922526	0.980105	0.00110963	-1.26651	-0.114719	-0.0503676	0.00577813823517085	-1.27229	-0.00688454	0.0184408201539415	-0.00456223	0.00543581747004732	-0.0145603
16900_29_MDGA1_MDGA1	LGALS1_P09382_OID20154_v1_Cardiometabolic	30	Inverse variance weighted	0.262312	0.0831253	1.29993	1.10449	1.52995	0.00160155	26	Inverse variance weighted	0.0352555	0.0170439	1.03588	1.00185	1.07107	0.0385921	483	Inverse variance weighted	-0.0356158	0.000828914052293622	0.965011	0.935159	0.995815	0.0263123	0.262312	0.0352555	-0.0356158	-0.00125566	0.263567814565627	-0.00288033	0.000369015976868818	-0.00478688	-0.0109805	0.00140678182161132
10816_150_PILRA_PILRA_isoform_FDF03_M14	GGH_Q92820_OID20416_v1_Cardiometabolic	116	Inverse variance weighted	0.168732	0.0409451	1.1838	1.09251	1.28272	3.77e-05	113	Inverse variance weighted	0.0161428	0.00670418	1.01627	1.00301	1.02972	0.0160458	533	Inverse variance weighted	-0.0503676	0.000785406907242118	0.95088	0.922526	0.980105	0.00110963	0.168732	0.0161428	-0.0503676	-0.000813075	0.169544736735794	-0.00235247	0.000726322802400256	-0.00481874	-0.0139421	0.00430460290493823
10816_150_PILRA_PILRA_isoform_FDF03_M14	PKN3_Q6P5Z2_OID31311_v1_Oncology_II	7	Inverse variance weighted	-0.511181	0.186426	0.599787	0.416205	0.864343	0.00610655	7	Inverse variance weighted	-0.0549936	0.0256944	0.946491	0.900005	0.995378	0.0323311	533	Inverse variance weighted	-0.0503676	0.001613010385206	0.95088	0.922526	0.980105	0.00110963	-0.511181	-0.0549936	-0.0503676	0.00276989501056684	-0.513951	-0.000391605	0.00593139536557059	-0.00541862	0.000766079237332517	-0.0116033
10916_44_PLA2R1_PLA2R	SLMAP_Q14BN4_OID31441_v1_Oncology_II	4	Inverse variance weighted	-1.26651	0.364859	0.281812	0.137843	0.576148	0.00051806	4	Inverse variance weighted	-0.129238	0.0647086	0.878765	0.77409	0.997594	0.0457998	463	Inverse variance weighted	-0.0561399	0.0084401062319473	0.945407	0.908533	0.983778	0.00567913	-1.26651	-0.129238	-0.0561399	0.00725542174813112	-1.27377	-0.00928719	0.0237980299627478	-0.00572865	0.00733286805374915	-0.0187902
10851_77_EBI3_IL27B	SH3BP1_Q9Y3L3_OID31439_v1_Oncology_II	25	Inverse variance weighted	0.37837	0.0910608	1.4599	1.22127	1.74516	3.25e-05	23	Inverse variance weighted	-0.0460231	0.018564	0.95502	0.920896	0.990409	0.0131693	314	Inverse variance weighted	0.0481619	0.00139321210386106	1.04934	1.00338	1.0974	0.0350521	0.37837	-0.0460231	0.0481619	-0.00221656	0.380586306765136	-0.00494726	0.00051413495843215	-0.00585819	-0.0130752	0.00135881624751295
6402_8_PILRA_PILRA_isoform_FDF03_deltaTM	PCDHB15_Q9Y5E8_OID31377_v1_Oncology_II	85	Inverse variance weighted	-0.138503	0.041758	0.87066	0.802239	0.944917	0.00091051	84	Inverse variance weighted	-0.0157988	0.00724956	0.984325	0.970438	0.998412	0.0293112	545	Inverse variance weighted	-0.0544331	0.000840634549766685	0.947022	0.919045	0.97585	0.000373905	-0.138503	-0.0157988	-0.0544331	0.000859977087937395	-0.139363	-0.000787667	0.0025076208054801	-0.00620907	0.00568698522087467	-0.0181051
6402_8_PILRA_PILRA_isoform_FDF03_deltaTM	GGH_Q92820_OID20416_v1_Cardiometabolic	116	Inverse variance weighted	0.168732	0.0409451	1.1838	1.09251	1.28272	3.77e-05	113	Inverse variance weighted	0.0192477	0.00745935	1.01943	1.00464	1.03445	0.00987014	545	Inverse variance weighted	-0.0544331	0.000845081189028088	0.947022	0.919045	0.97585	0.000373905	0.168732	0.0192477	-0.0544331	-0.00104771	0.169779373776463	-0.00270407	0.000608647354032108	-0.00620934	-0.0160259	0.00360719112712888
16900_29_MDGA1_MDGA1	SLMAP_Q14BN4_OID31441_v1_Oncology_II	4	Inverse variance weighted	-1.26651	0.364859	0.281812	0.137843	0.576148	0.00051806	4	Inverse variance weighted	-0.234416	0.0716327	0.791033	0.687416	0.910268	0.00106612	483	Inverse variance weighted	-0.0356158	0.0168015275035706	0.965011	0.935159	0.995815	0.0263123	-1.26651	-0.234416	-0.0356158	0.00834891319856931	-1.27486	-0.0245821	0.0412799071055676	-0.00659204	0.0194092317379446	-0.0325933
10916_44_PLA2R1_PLA2R	NT5C_Q8TCD5_OID30294_v1_Cardiometabolic_II	35	Inverse variance weighted	-0.189963	0.0722144	0.826989	0.717844	0.952731	0.00852475	29	Inverse variance weighted	-0.0238921	0.0107094	0.976391	0.95611	0.997103	0.0256852	463	Inverse variance weighted	-0.0561399	0.00116791403748831	0.945407	0.908533	0.983778	0.00567913	-0.189963	-0.0238921	-0.0561399	0.00134129891514595	-0.191305	-0.000947813	0.00363041042862305	-0.00706083	0.00498944790714049	-0.0191111
4430_44_COLEC11_Collectin_Kidney_1	LY75_O60449_OID20580_v1_Inflammation	173	Inverse variance weighted	0.115247	0.0206121	1.12215	1.07772	1.16841	2.25e-08	173	Inverse variance weighted	0.0125457	0.00529142	1.01262	1.00218	1.02318	0.0177423	197	Inverse variance weighted	-0.0649238	0.0016988964462043	0.937139	0.890321	0.986418	0.0130289	0.115247	0.0125457	-0.0649238	-0.000814515	0.116061527969931	-0.00414435	0.00251532206462909	-0.00706756	-0.0359606	0.0218254859640405
5660_51_SOD3_SOD3	SLMAP_Q14BN4_OID31441_v1_Oncology_II	4	Inverse variance weighted	-1.26651	0.364859	0.281812	0.137843	0.576148	0.00051806	4	Inverse variance weighted	-0.169481	0.078023	0.844103	0.724404	0.98358	0.0298408	182	Inverse variance weighted	-0.0535002	0.0132968102214635	0.947906	0.900683	0.997605	0.0401713	-1.26651	-0.169481	-0.0535002	0.00906729264200342	-1.27558	-0.0169945	0.0351290406760719	-0.00715925	0.0134182832965661	-0.0277368
3054_3_HP_Haptoglobin__Mixed_Type	MIA_Q16674_OID21531_v1_Oncology	92	Inverse variance weighted	-0.109323	0.0345502	0.896441	0.837745	0.95925	0.0015553	85	Inverse variance weighted	-0.0150963	0.00695785	0.985017	0.971675	0.998542	0.0300317	440	Inverse variance weighted	-0.0519834	0.00103656558922011	0.949345	0.913141	0.986984	0.00878166	-0.109323	-0.0150963	-0.0519834	0.000784754665580914	-0.110107	-0.00124691	0.00281642322045232	-0.00717835	0.0114058299404713	-0.0257625
16900_29_MDGA1_MDGA1	LAMP3_Q9UQV4_OID20638_v1_Inflammation	47	Inverse variance weighted	0.322849	0.0879173	1.38106	1.16245	1.64077	0.000240486	47	Inverse variance weighted	0.0675091	0.0295694	1.06984	1.0096	1.13368	0.022426	483	Inverse variance weighted	-0.0356158	0.00207626035122407	0.965011	0.935159	0.995815	0.0263123	0.322849	0.0675091	-0.0356158	-0.00240439	0.325252935810211	-0.00647386	0.00166507647818829	-0.00744744	-0.0200523	0.00515745391902153
10816_150_PILRA_PILRA_isoform_FDF03_M14	LGALS1_P09382_OID20154_v1_Cardiometabolic	30	Inverse variance weighted	0.262312	0.0831253	1.29993	1.10449	1.52995	0.00160155	26	Inverse variance weighted	0.0389201	0.0141514	1.03969	1.01125	1.06893	0.00595477	533	Inverse variance weighted	-0.0503676	0.000953154513058861	0.95088	0.922526	0.980105	0.00110963	0.262312	0.0389201	-0.0503676	-0.00196031	0.264272469849703	-0.00382849	-9.2128e-05	-0.0074732	-0.0145952	-0.000351215
6402_8_PILRA_PILRA_isoform_FDF03_deltaTM	LGALS1_P09382_OID20154_v1_Cardiometabolic	30	Inverse variance weighted	0.262312	0.0831253	1.29993	1.10449	1.52995	0.00160155	26	Inverse variance weighted	0.0369961	0.013367	1.03769	1.01086	1.06523	0.00564485	545	Inverse variance weighted	-0.0544331	0.000968557503344765	0.947022	0.919045	0.97585	0.000373905	0.262312	0.0369961	-0.0544331	-0.00201381	0.264325970925716	-0.00391218	-0.000115439	-0.00767716	-0.0149142	-0.000440083
10851_77_EBI3_IL27B	MME_P08473_OID21307_v1_Oncology	89	Inverse variance weighted	-0.142375	0.0482966	0.867296	0.788962	0.953406	0.00319901	84	Inverse variance weighted	0.0231213	0.0112652	1.02339	1.00104	1.04624	0.0401248	314	Inverse variance weighted	0.0481619	0.00113089768260208	1.04934	1.00338	1.0974	0.0350521	-0.142375	0.0231213	0.0481619	0.00111356781728927	-0.143489	-0.00110299	0.00333012727518935	-0.00782135	0.00774706483480476	-0.0233898
11308_8_CREB3L4_CR3L4	TCN2_P20062_OID20341_v1_Cardiometabolic	127	Inverse variance weighted	0.158633	0.0418706	1.17191	1.07957	1.27214	0.000151476	124	Inverse variance weighted	0.0156796	0.0072376	1.0158	1.0015	1.03032	0.0302795	110	Inverse variance weighted	-0.0823278	0.00338676547069337	0.92097	0.849666	0.998258	0.0452412	0.158633	0.0156796	-0.0823278	-0.00129087	0.15992348534439	-0.00792893	0.00534718997816881	-0.00813748	-0.049983	0.0337080112949586
6402_8_PILRA_PILRA_isoform_FDF03_deltaTM	PECR_Q9BY49_OID30228_v1_Cardiometabolic_II	19	Inverse variance weighted	0.296853	0.114612	1.34562	1.07488	1.68454	0.00959588	17	Inverse variance weighted	0.0459537	0.0151782	1.04703	1.01634	1.07864	0.00246492	545	Inverse variance weighted	-0.0544331	0.0010862990782976	0.947022	0.919045	0.97585	0.000373905	0.296853	0.0459537	-0.0544331	-0.0025014	0.29935430831105	-0.00463055	-0.000372255	-0.0084264	-0.0155988	-0.00125401
16900_29_MDGA1_MDGA1	FST_P19883_OID20770_v1_Inflammation	20	Inverse variance weighted	-0.317046	0.135903	0.728297	0.557989	0.950586	0.019654	19	Inverse variance weighted	-0.0752418	0.0262027	0.927519	0.881087	0.976399	0.00408498	483	Inverse variance weighted	-0.0356158	0.00205256062317009	0.965011	0.935159	0.995815	0.0263123	-0.317046	-0.0752418	-0.0356158	0.00267980043632932	-0.319726	-0.00134322	0.00670281925774269	-0.0084524	0.00423666666620631	-0.0211415
6402_8_PILRA_PILRA_isoform_FDF03_deltaTM	CTBS_Q01459_OID30710_v1_Inflammation_II	101	Inverse variance weighted	0.101137	0.0392149	1.10643	1.02457	1.19482	0.00990743	97	Inverse variance weighted	0.0159761	0.00605735	1.0161	1.00411	1.02824	0.00835278	545	Inverse variance weighted	-0.0544331	0.000838399240344829	0.947022	0.919045	0.97585	0.000373905	0.101137	0.0159761	-0.0544331	-0.000869627	0.102006491603506	-0.00251289	0.000773635907570357	-0.00859851	-0.0248464	0.00764939577245505
19361_78_MATN3_MATN3	LGALS1_P09382_OID20154_v1_Cardiometabolic	30	Inverse variance weighted	0.262312	0.0831253	1.29993	1.10449	1.52995	0.00160155	26	Inverse variance weighted	0.0440122	0.0177044	1.045	1.00936	1.08189	0.0129207	296	Inverse variance weighted	-0.0522868	0.00147583267074687	0.949057	0.905498	0.99471	0.0291642	0.262312	0.0440122	-0.0522868	-0.00230126	0.264613414580361	-0.00519389	0.000591376454303058	-0.00877297	-0.0198004	0.00225447595169638
16900_29_MDGA1_MDGA1	CD302_Q8IX05_OID21328_v1_Oncology	84	Inverse variance weighted	-0.215996	0.071898	0.805739	0.699832	0.927673	0.00266285	95	Inverse variance weighted	-0.0543343	0.0259853	0.947115	0.900085	0.996603	0.0365314	483	Inverse variance weighted	-0.0356158	0.00152298248371262	0.965011	0.935159	0.995815	0.0263123	-0.215996	-0.0543343	-0.0356158	0.0019351631225086	-0.217931	-0.00104988	0.00492020879058534	-0.00895927	0.00486066844699757	-0.0227792
10816_150_PILRA_PILRA_isoform_FDF03_M14	ICAM3_P32942_OID20277_v1_Cardiometabolic	168	Inverse variance weighted	0.171889	0.0444226	1.18755	1.08852	1.29558	0.000109099	181	Inverse variance weighted	0.0310167	0.00794446	1.0315	1.01557	1.04769	9.45e-05	533	Inverse variance weighted	-0.0503676	0.00081600861444992	0.95088	0.922526	0.980105	0.00110963	0.171889	0.0310167	-0.0503676	-0.00156224	0.173451465838712	-0.00316162	3.71380456094645e-05	-0.00908864	-0.0183933	0.000216058017466473
6402_8_PILRA_PILRA_isoform_FDF03_deltaTM	LIPF_P07098_OID30266_v1_Cardiometabolic_II	57	Inverse variance weighted	-0.146122	0.0619149	0.864052	0.765309	0.975535	0.0182726	61	Inverse variance weighted	-0.0249612	0.0119475	0.975348	0.952773	0.998457	0.0366853	545	Inverse variance weighted	-0.0544331	0.000884582104286608	0.947022	0.919045	0.97585	0.000373905	-0.146122	-0.0249612	-0.0544331	0.00135871654558347	-0.147481	-0.000375064	0.00309249746998522	-0.0092985	0.00256678593022093	-0.0211638
10816_150_PILRA_PILRA_isoform_FDF03_M14	CTBS_Q01459_OID30710_v1_Inflammation_II	101	Inverse variance weighted	0.101137	0.0392149	1.10643	1.02457	1.19482	0.00990743	97	Inverse variance weighted	0.0189125	0.00617582	1.01909	1.00683	1.0315	0.0021961	533	Inverse variance weighted	-0.0503676	0.000786634467581313	0.95088	0.922526	0.980105	0.00110963	0.101137	0.0189125	-0.0503676	-0.000952577	0.102089442304083	-0.00249438	0.000589226252376502	-0.0094187	-0.0246634	0.00582602844547833
7905_30_HP_HPT	MIA_Q16674_OID21531_v1_Oncology	92	Inverse variance weighted	-0.109323	0.0345502	0.896441	0.837745	0.95925	0.0015553	85	Inverse variance weighted	-0.0149382	0.0070602	0.985173	0.971634	0.9989	0.034359	397	Inverse variance weighted	-0.069507	0.00147940590436951	0.932854	0.894833	0.97249	0.00106043	-0.109323	-0.0149382	-0.069507	0.00103831027740554	-0.110361	-0.00186133	0.00393794584996978	-0.00949768	0.017026003128859	-0.0360214
10916_44_PLA2R1_PLA2R	S100A11_P31949_OID20130_v1_Cardiometabolic	16	Inverse variance weighted	0.304764	0.114346	1.35631	1.08399	1.69704	0.00769246	16	Inverse variance weighted	0.0516775	0.0203789	1.05304	1.0118	1.09595	0.011218	463	Inverse variance weighted	-0.0561399	0.00155165562324529	0.945407	0.908533	0.983778	0.00567913	0.304764	0.0516775	-0.0561399	-0.00290117	0.307665405049452	-0.00594241	0.000140075972108591	-0.00951939	-0.0194984	0.000459620767669705
10916_44_PLA2R1_PLA2R	MST1_P26927_OID30713_v1_Inflammation_II	186	Inverse variance weighted	-0.0619263	0.0216835	0.939952	0.900842	0.980761	0.00429115	186	Inverse variance weighted	-0.0105561	0.00416559	0.989499	0.981454	0.997611	0.0112732	463	Inverse variance weighted	-0.0561399	0.00114038900615666	0.945407	0.908533	0.983778	0.00567913	-0.0619263	-0.0105561	-0.0561399	0.000592617051509868	-0.062519	-0.00164255	0.00282777950357692	-0.00956971	0.0265241771899962	-0.0456636
10851_77_EBI3_IL27B	CD302_Q8IX05_OID21328_v1_Oncology	84	Inverse variance weighted	-0.215996	0.071898	0.805739	0.699832	0.927673	0.00266285	95	Inverse variance weighted	0.0430003	0.0145226	1.04394	1.01464	1.07408	0.00306729	314	Inverse variance weighted	0.0481619	0.00126532988950208	1.04934	1.00338	1.0974	0.0350521	-0.215996	0.0430003	0.0481619	0.0020709770395057	-0.218066	-0.00040907	0.00455102362292977	-0.00958806	0.00189387987555855	-0.02107
3054_3_HP_Haptoglobin__Mixed_Type	MATN3_O15232_OID20979_v1_Neurology	89	Inverse variance weighted	-0.0841588	0.0386753	0.919285	0.852176	0.99168	0.0295529	82	Inverse variance weighted	-0.0157139	0.00712718	0.984409	0.970753	0.998257	0.0274694	440	Inverse variance weighted	-0.0519834	0.00103729378376985	0.949345	0.913141	0.986984	0.00878166	-0.0841588	-0.0157139	-0.0519834	0.000816861441486804	-0.0849756	-0.00121623	0.00284995725767571	-0.00970619	0.0144516632227651	-0.0338641
19361_78_MATN3_MATN3	PKN3_Q6P5Z2_OID31311_v1_Oncology_II	7	Inverse variance weighted	-0.511181	0.186426	0.599787	0.416205	0.864343	0.00610655	7	Inverse variance weighted	-0.0963817	0.035683	0.908117	0.846775	0.973904	0.006912	296	Inverse variance weighted	-0.0522868	0.00366045568524565	0.949057	0.905498	0.99471	0.0291642	-0.511181	-0.0963817	-0.0522868	0.0050394895169001	-0.516221	-0.002135	0.0122139826599816	-0.00985852	0.0041766078346018	-0.0238936
5660_51_SOD3_SOD3	DDR1_Q08345_OID21009_v1_Neurology	115	Inverse variance weighted	0.179072	0.0459826	1.19611	1.09302	1.30891	9.85e-05	140	Inverse variance weighted	0.0330762	0.0131397	1.03363	1.00735	1.06059	0.0118265	182	Inverse variance weighted	-0.0535002	0.00146102157441495	0.947906	0.900683	0.997605	0.0401713	0.179072	0.0330762	-0.0535002	-0.00176959	0.180841943292876	-0.00463319	0.0010940149929773	-0.00988197	-0.0258733	0.00610934606219899
10816_150_PILRA_PILRA_isoform_FDF03_M14	PECR_Q9BY49_OID30228_v1_Cardiometabolic_II	19	Inverse variance weighted	0.296853	0.114612	1.34562	1.07488	1.68454	0.00959588	17	Inverse variance weighted	0.0582497	0.016037	1.05998	1.02718	1.09383	0.000280999	533	Inverse variance weighted	-0.0503676	0.00121564125228911	0.95088	0.922526	0.980105	0.00110963	0.296853	0.0582497	-0.0503676	-0.0029339	0.299786803124253	-0.00531655	-0.000551239	-0.00988333	-0.0179097	-0.00185694
6402_8_PILRA_PILRA_isoform_FDF03_deltaTM	ICAM3_P32942_OID20277_v1_Cardiometabolic	168	Inverse variance weighted	0.171889	0.0444226	1.18755	1.08852	1.29558	0.000109099	181	Inverse variance weighted	0.0314384	0.00855332	1.03194	1.01478	1.04938	0.000237309	545	Inverse variance weighted	-0.0544331	0.000875132612918824	0.947022	0.919045	0.97585	0.000373905	0.171889	0.0314384	-0.0544331	-0.00171129	0.173600517116805	-0.00342655	3.96980451579376e-06	-0.00995577	-0.0199346	2.30951327496153e-05
10816_150_PILRA_PILRA_isoform_FDF03_M14	FST_P19883_OID20770_v1_Inflammation	20	Inverse variance weighted	-0.317046	0.135903	0.728297	0.557989	0.950586	0.019654	19	Inverse variance weighted	-0.063202	0.0234891	0.938754	0.896515	0.982983	0.00713039	533	Inverse variance weighted	-0.0503676	0.00167602753283888	0.95088	0.922526	0.980105	0.00110963	-0.317046	-0.063202	-0.0503676	0.00318333256241841	-0.320229	-0.000101681	0.00646834652678262	-0.0100406	0.000320714941800004	-0.0204019
6402_8_PILRA_PILRA_isoform_FDF03_deltaTM	TYRO3_Q06418_OID20161_v1_Cardiometabolic	154	Inverse variance weighted	0.091315	0.0317043	1.09561	1.0296	1.16586	0.00397413	146	Inverse variance weighted	0.0168584	0.00534623	1.017	1.0064	1.02771	0.0016142	545	Inverse variance weighted	-0.0544331	0.000837658391462578	0.947022	0.919045	0.97585	0.000373905	0.091315	0.0168584	-0.0544331	-0.000917656	0.0922326310679905	-0.00255947	0.000724154379276146	-0.0100493	-0.028029	0.00793029160086992
10916_44_PLA2R1_PLA2R	NCF2_P19878_OID20567_v1_Inflammation	15	Inverse variance weighted	0.294592	0.140652	1.34258	1.01909	1.76874	0.0362172	16	Inverse variance weighted	0.0536516	0.0243676	1.05512	1.00591	1.10673	0.0276822	463	Inverse variance weighted	-0.0561399	0.0017342833576216	0.945407	0.908533	0.983778	0.00567913	0.294592	0.0536516	-0.0561399	-0.00301199	0.297603959127809	-0.00641119	0.000387201253129462	-0.0102243	-0.0217629	0.00131436460980686
19361_78_MATN3_MATN3	CES1_P23141_OID20244_v1_Cardiometabolic	56	Inverse variance weighted	-0.134492	0.0621073	0.87416	0.77397	0.987319	0.0303509	57	Inverse variance weighted	-0.0268747	0.013016	0.973483	0.948962	0.998638	0.0389475	296	Inverse variance weighted	-0.0522868	0.00130125973068463	0.949057	0.905498	0.99471	0.0291642	-0.134492	-0.0268747	-0.0522868	0.0014051932744164	-0.135897	-0.00114528	0.00395566234655828	-0.0104481	0.00851555698831077	-0.0294118
3054_3_HP_Haptoglobin__Mixed_Type	SCGN_O76038_OID20457_v1_Inflammation	22	Inverse variance weighted	-0.259314	0.130132	0.771581	0.597875	0.995754	0.0462949	22	Inverse variance weighted	-0.054909	0.0252499	0.946571	0.900866	0.994596	0.0296587	440	Inverse variance weighted	-0.0519834	0.00172791141562205	0.949345	0.913141	0.986984	0.00878166	-0.259314	-0.054909	-0.0519834	0.00285435816304404	-0.262169	-0.000532348	0.00624106453766325	-0.0110073	0.00205290843332865	-0.0240676
5660_51_SOD3_SOD3	PKN3_Q6P5Z2_OID31311_v1_Oncology_II	7	Inverse variance weighted	-0.511181	0.186426	0.599787	0.416205	0.864343	0.00610655	7	Inverse variance weighted	-0.105829	0.0351397	0.899578	0.839706	0.963719	0.0025982	182	Inverse variance weighted	-0.0535002	0.00397179881724319	0.947906	0.900683	0.997605	0.0401713	-0.511181	-0.105829	-0.0535002	0.00566187860979623	-0.516843	-0.00212285	0.0134466042915929	-0.0110761	0.00415282653567973	-0.026305
19361_78_MATN3_MATN3	PDLIM7_Q9NR12_OID20729_v1_Inflammation	6	Inverse variance weighted	-0.666372	0.299942	0.513569	0.285287	0.924516	0.0263059	6	Inverse variance weighted	-0.141572	0.0561735	0.867993	0.7775	0.969018	0.0117267	296	Inverse variance weighted	-0.0522868	0.00805074626210539	0.949057	0.905498	0.99471	0.0291642	-0.666372	-0.141572	-0.0522868	0.0074023389182109	-0.673774	-0.00837712	0.0231818015919375	-0.0111084	0.0125712515548994	-0.0347881
3054_3_HP_Haptoglobin__Mixed_Type	DDR1_Q08345_OID21009_v1_Neurology	115	Inverse variance weighted	0.179072	0.0459826	1.19611	1.09302	1.30891	9.85e-05	140	Inverse variance weighted	0.03842	0.0117715	1.03917	1.01547	1.06342	0.0010992	440	Inverse variance weighted	-0.0519834	0.00112604408923153	0.949345	0.913141	0.986984	0.00878166	0.179072	0.03842	-0.0519834	-0.0019972	0.181069560637283	-0.00420425	0.000209841777610901	-0.0111531	-0.0234779	0.00117182675371122
10816_150_PILRA_PILRA_isoform_FDF03_M14	IGF2R_P11717_OID21146_v1_Neurology	99	Inverse variance weighted	0.0986377	0.0477835	1.10367	1.00499	1.21203	0.0389928	105	Inverse variance weighted	0.0220059	0.00896407	1.02225	1.00445	1.04037	0.0140923	533	Inverse variance weighted	-0.0503676	0.000802535929189425	0.95088	0.922526	0.980105	0.00110963	0.0986377	0.0220059	-0.0503676	-0.00110838	0.0997460461140635	-0.00268135	0.00046458630714776	-0.0112369	-0.0271839	0.00471002959445409
10851_77_EBI3_IL27B	BTN2A1_Q7KYR7_OID20713_v1_Inflammation	133	Inverse variance weighted	-0.145131	0.0390027	0.864909	0.801255	0.93362	0.000198394	143	Inverse variance weighted	0.0340763	0.00943145	1.03466	1.01571	1.05397	0.000302616	314	Inverse variance weighted	0.0481619	0.00114646328761242	1.04934	1.00338	1.0974	0.0350521	-0.145131	0.0340763	0.0481619	0.00164118063968877	-0.146772	-0.000605887	0.00388824868340913	-0.0113083	0.00417475860110018	-0.0267913
10916_44_PLA2R1_PLA2R	IPCEF1_Q8WWN9_OID20977_v1_Neurology	7	Inverse variance weighted	-0.572391	0.278585	0.564175	0.326796	0.973981	0.0399144	7	Inverse variance weighted	-0.117251	0.0427344	0.889362	0.817904	0.967063	0.00607469	463	Inverse variance weighted	-0.0561399	0.00513861503158032	0.945407	0.908533	0.983778	0.00567913	-0.572391	-0.117251	-0.0561399	0.00658248245566433	-0.578973	-0.0034892	0.0166541679175618	-0.0115	0.00609583861141957	-0.0290958
10916_44_PLA2R1_PLA2R	MSR1_P21757_OID21063_v1_Neurology	90	Inverse variance weighted	0.134499	0.0622835	1.14396	1.0125	1.2925	0.0308138	96	Inverse variance weighted	0.027878	0.0139717	1.02827	1.00049	1.05682	0.0460078	463	Inverse variance weighted	-0.0561399	0.00120426984050281	0.945407	0.908533	0.983778	0.00567913	0.134499	0.027878	-0.0561399	-0.00156507	0.136064297915088	-0.00392544	0.000795299972298004	-0.0116363	-0.0291856	0.0059130448420489
3580_25_SERPINA1_a1_Antitrypsin	GGH_Q92820_OID20416_v1_Cardiometabolic	116	Inverse variance weighted	0.168732	0.0409451	1.1838	1.09251	1.28272	3.77e-05	113	Inverse variance weighted	-0.0221095	0.0101911	0.978133	0.958789	0.997867	0.030045	133	Inverse variance weighted	0.089673	0.00310632203756005	1.09382	1.0222	1.17045	0.00944517	0.168732	-0.0221095	0.089673	-0.00198263	0.17071429045742	-0.00807102	0.00410576273619723	-0.0117502	-0.0478335	0.0243330901120219
10816_150_PILRA_PILRA_isoform_FDF03_M14	MSR1_P21757_OID21063_v1_Neurology	90	Inverse variance weighted	0.134499	0.0622835	1.14396	1.0125	1.2925	0.0308138	96	Inverse variance weighted	0.031603	0.0123786	1.03211	1.00737	1.05745	0.0106787	533	Inverse variance weighted	-0.0503676	0.00087074016735843	0.95088	0.922526	0.980105	0.00110963	0.134499	0.031603	-0.0503676	-0.00159177	0.136090994883124	-0.00329842	0.000114884844898161	-0.0118348	-0.0245237	0.000854167311978874
16900_29_MDGA1_MDGA1	ALDH5A1_P51649_OID31047_v1_Neurology_II	11	Inverse variance weighted	0.446237	0.160841	1.56242	1.13995	2.14146	0.0055305	13	Inverse variance weighted	0.149352	0.0461956	1.16108	1.06057	1.27112	0.00122478	483	Inverse variance weighted	-0.0356158	0.00692300628633043	0.965011	0.935159	0.995815	0.0263123	0.446237	0.149352	-0.0356158	-0.00531931	0.451556443064147	-0.0188884	0.00824978225706072	-0.0119204	-0.0423282	0.0184874400783243
10816_150_PILRA_PILRA_isoform_FDF03_M14	CD27_P26842_OID21527_v1_Oncology	42	Inverse variance weighted	0.179611	0.0807451	1.19675	1.02158	1.40196	0.02612	44	Inverse variance weighted	0.0427827	0.016751	1.04371	1.01	1.07855	0.0106484	533	Inverse variance weighted	-0.0503676	0.00105770753709606	0.95088	0.922526	0.980105	0.00110963	0.179611	0.0427827	-0.0503676	-0.00215486	0.181766117865527	-0.00422797	-8.17541e-05	-0.0119974	-0.0235395	-0.000455172
7905_30_HP_HPT	MATN3_O15232_OID20979_v1_Neurology	89	Inverse variance weighted	-0.0841588	0.0386753	0.919285	0.852176	0.99168	0.0295529	82	Inverse variance weighted	-0.0145517	0.00720276	0.985554	0.971738	0.999566	0.0433535	397	Inverse variance weighted	-0.069507	0.00147935937535716	0.932854	0.894833	0.97249	0.00106043	-0.0841588	-0.0145517	-0.069507	0.00101144206195612	-0.0851702	-0.0018881	0.00391098643765615	-0.0120183	0.0224350004702291	-0.0464715
10851_77_EBI3_IL27B	ITGBL1_O95965_OID30408_v1_Cardiometabolic_II	76	Inverse variance weighted	-0.111669	0.0486193	0.894341	0.81305	0.983759	0.0216305	80	Inverse variance weighted	0.028195	0.0101625	1.0286	1.00831	1.04929	0.0055301	314	Inverse variance weighted	0.0481619	0.00113718404664852	1.04934	1.00338	1.0974	0.0350521	-0.111669	0.028195	0.0481619	0.00135792528042281	-0.113026	-0.000870955	0.00358680601185391	-0.0121603	0.00779946992958272	-0.0321201
16900_29_MDGA1_MDGA1	ITGB2_P05107_OID20315_v1_Cardiometabolic	53	Inverse variance weighted	0.214538	0.0900278	1.23929	1.03882	1.47845	0.0171713	52	Inverse variance weighted	0.0768793	0.0285607	1.07991	1.02112	1.14209	0.00710706	483	Inverse variance weighted	-0.0356158	0.00226875354507516	0.965011	0.935159	0.995815	0.0263123	0.214538	0.0768793	-0.0356158	-0.00273812	0.217276130516274	-0.00718488	0.0017086364320731	-0.0127629	-0.03349	0.00796425972289526
5660_51_SOD3_SOD3	CES1_P23141_OID20244_v1_Cardiometabolic	56	Inverse variance weighted	-0.134492	0.0621073	0.87416	0.77397	0.987319	0.0303509	57	Inverse variance weighted	-0.0334639	0.0134643	0.96709	0.941902	0.992951	0.0129414	182	Inverse variance weighted	-0.0535002	0.00146584761401288	0.947906	0.900683	0.997605	0.0401713	-0.134492	-0.0334639	-0.0535002	0.00179032773130448	-0.136283	-0.00108273	0.00466338905476973	-0.0133118	0.00805053212991543	-0.0346741
10574_10_AXL_AXL	ICAM3_P32942_OID20277_v1_Cardiometabolic	168	Inverse variance weighted	0.171889	0.0444226	1.18755	1.08852	1.29558	0.000109099	181	Inverse variance weighted	0.0217323	0.0093587	1.02197	1.0034	1.04089	0.0202247	148	Inverse variance weighted	-0.105831	0.00429529133557975	0.899576	0.830862	0.973973	0.00904085	0.171889	0.0217323	-0.105831	-0.00229996	0.174189191973733	-0.0107187	0.00611880604400296	-0.0133805	-0.0623584	0.0355973794914033
3181_50_CTSS_Cathepsin_S	LY75_O60449_OID20580_v1_Inflammation	173	Inverse variance weighted	0.115247	0.0206121	1.12215	1.07772	1.16841	2.25e-08	173	Inverse variance weighted	-0.0127944	0.00596658	0.987287	0.975809	0.998901	0.0320052	63	Inverse variance weighted	0.121759	0.00754340378980719	1.12948	1.00034	1.2753	0.0493662	0.115247	-0.0127944	0.121759	-0.00155783	0.116804842858847	-0.0163429	0.013227241569175	-0.0135173	-0.141808	0.114772966559879
10916_44_PLA2R1_PLA2R	FST_P19883_OID20770_v1_Inflammation	20	Inverse variance weighted	-0.317046	0.135903	0.728297	0.557989	0.950586	0.019654	19	Inverse variance weighted	-0.0790991	0.0332277	0.923948	0.865693	0.986124	0.0172886	463	Inverse variance weighted	-0.0561399	0.00286468668752899	0.945407	0.908533	0.983778	0.00567913	-0.317046	-0.0790991	-0.0561399	0.00444061531389787	-0.321487	-0.00117417	0.0100554012214547	-0.0140062	0.00370347031416136	-0.0317159
5660_51_SOD3_SOD3	PVR_P15151_OID21011_v1_Neurology	81	Inverse variance weighted	-0.0773995	0.0382099	0.92552	0.858738	0.997495	0.0428016	83	Inverse variance weighted	-0.0204857	0.00771235	0.979723	0.965024	0.994645	0.00790233	182	Inverse variance weighted	-0.0535002	0.00140380153171422	0.947906	0.900683	0.997605	0.0401713	-0.0773995	-0.0204857	-0.0535002	0.00109598758654334	-0.0784955	-0.00165546	0.0038474385887032	-0.0141601	0.0213885499699575	-0.0497088
16900_29_MDGA1_MDGA1	ICAM3_P32942_OID20277_v1_Cardiometabolic	168	Inverse variance weighted	0.171889	0.0444226	1.18755	1.08852	1.29558	0.000109099	181	Inverse variance weighted	0.0685052	0.0182805	1.07091	1.03322	1.10997	0.000178644	483	Inverse variance weighted	-0.0356158	0.00137633848465458	0.965011	0.935159	0.995815	0.0263123	0.171889	0.0685052	-0.0356158	-0.00243987	0.174329098245064	-0.00513749	0.000257752184858563	-0.0141944	-0.0298884	0.00149952495195387
3054_3_HP_Haptoglobin__Mixed_Type	MILR1_Q7Z6M3_OID20482_v1_Inflammation	114	Inverse variance weighted	0.0790417	0.0362447	1.08225	1.00803	1.16193	0.0291998	111	Inverse variance weighted	0.0216083	0.009371	1.02184	1.00325	1.04079	0.0211179	440	Inverse variance weighted	-0.0519834	0.00105092252331783	0.949345	0.913141	0.986984	0.00878166	0.0790417	0.0216083	-0.0519834	-0.00112327	0.0801649774646533	-0.00318308	0.000936534681049683	-0.0142111	-0.0402709	0.0118486145117732
6402_8_PILRA_PILRA_isoform_FDF03_deltaTM	MSR1_P21757_OID21063_v1_Neurology	90	Inverse variance weighted	0.134499	0.0622835	1.14396	1.0125	1.2925	0.0308138	96	Inverse variance weighted	0.0352612	0.013347	1.03589	1.00914	1.06335	0.00824454	545	Inverse variance weighted	-0.0544331	0.000956577938705929	0.947022	0.919045	0.97585	0.000373905	0.134499	0.0352612	-0.0544331	-0.00191938	0.136418605136789	-0.00379427	-4.44834e-05	-0.0142705	-0.0282103	-0.000330733
11327_56_CLK2_CLK2	TCN2_P20062_OID20341_v1_Cardiometabolic	127	Inverse variance weighted	0.158633	0.0418706	1.17191	1.07957	1.27214	0.000151476	124	Inverse variance weighted	0.0182756	0.00669662	1.01844	1.00516	1.0319	0.00635106	73	Inverse variance weighted	-0.129043	0.00828196783602747	0.878936	0.775055	0.996741	0.0443391	0.158633	0.0182756	-0.129043	-0.00235834	0.160990959690044	-0.018591	0.0138743122685703	-0.0148667	-0.117195	0.0874619148689588
13565_2_RBL2_p130	RGMA_Q96B86_OID21065_v1_Neurology	100	Inverse variance weighted	-0.164841	0.0470679	0.848029	0.773296	0.929984	0.000461451	100	Inverse variance weighted	-0.0261609	0.0113694	0.974178	0.95271	0.996131	0.0213927	151	Inverse variance weighted	-0.0945989	0.00386490764836235	0.909738	0.839928	0.985349	0.0202156	-0.164841	-0.0261609	-0.0945989	0.00247478732333272	-0.167315	-0.00510043	0.0100500063141229	-0.0150132	0.0309415983472268	-0.060968
10916_44_PLA2R1_PLA2R	ITGB2_P05107_OID20315_v1_Cardiometabolic	53	Inverse variance weighted	0.214538	0.0900278	1.23929	1.03882	1.47845	0.0171713	52	Inverse variance weighted	0.0579678	0.0237404	1.05968	1.0115	1.11015	0.0146167	463	Inverse variance weighted	-0.0561399	0.00178673300623583	0.945407	0.908533	0.983778	0.00567913	0.214538	0.0579678	-0.0561399	-0.00325431	0.217792316356046	-0.0067563	0.000247690336175835	-0.0151689	-0.0314923	0.00115452891623184
10916_44_PLA2R1_PLA2R	STAB2_Q8WWQ8_OID30401_v1_Cardiometabolic_II	120	Inverse variance weighted	-0.0957426	0.0483882	0.908698	0.826477	0.999099	0.047857	125	Inverse variance weighted	-0.0262339	0.0130186	0.974107	0.949566	0.999283	0.0438936	463	Inverse variance weighted	-0.0561399	0.00118961999357696	0.945407	0.908533	0.983778	0.00567913	-0.0957426	-0.0262339	-0.0561399	0.00147276888621248	-0.0972154	-0.000858886	0.00380442407362333	-0.0153826	0.00897078644008609	-0.039736
16900_29_MDGA1_MDGA1	IL15_P40933_OID20562_v1_Inflammation	87	Inverse variance weighted	-0.176418	0.067878	0.838268	0.733844	0.95755	0.00934837	87	Inverse variance weighted	-0.0768987	0.0302088	0.925984	0.872748	0.982466	0.01091	483	Inverse variance weighted	-0.0356158	0.00239216386606892	0.965011	0.935159	0.995815	0.0263123	-0.176418	-0.0768987	-0.0356158	0.00273881071559881	-0.179157	-0.00194983	0.00742745189309389	-0.0155246	0.0110523326286827	-0.0421014
6402_8_PILRA_PILRA_isoform_FDF03_deltaTM	CD27_P26842_OID21527_v1_Oncology	42	Inverse variance weighted	0.179611	0.0807451	1.19675	1.02158	1.40196	0.02612	44	Inverse variance weighted	0.0512578	0.0148647	1.05259	1.02237	1.08371	0.000564141	545	Inverse variance weighted	-0.0544331	0.0011287537972277	0.947022	0.919045	0.97585	0.000373905	0.179611	0.0512578	-0.0544331	-0.00279012	0.182401374312061	-0.00500247	-0.00057776	-0.0155342	-0.0278517	-0.00321672
5491_12_SPOCK2_Testican_2	LY75_O60449_OID20580_v1_Inflammation	173	Inverse variance weighted	0.115247	0.0206121	1.12215	1.07772	1.16841	2.25e-08	173	Inverse variance weighted	-0.00913129	0.00454845	0.99091	0.982116	0.999784	0.0446901	47	Inverse variance weighted	0.205713	0.0193304626144831	1.2284	1.02177	1.47682	0.0285836	0.115247	-0.00913129	0.205713	-0.00187842	0.117125436702997	-0.0397661	0.0360092830213901	-0.0162991	-0.345051	0.312453070010501
11308_8_CREB3L4_CR3L4	PKN3_Q6P5Z2_OID31311_v1_Oncology_II	7	Inverse variance weighted	-0.511181	0.186426	0.599787	0.416205	0.864343	0.00610655	7	Inverse variance weighted	-0.102149	0.0399222	0.902895	0.834939	0.976382	0.0105062	110	Inverse variance weighted	-0.0823278	0.00529977249538257	0.92097	0.849666	0.998258	0.0452412	-0.511181	-0.102149	-0.0823278	0.00840972353489625	-0.519591	-0.00197783	0.0187972776258461	-0.0164515	0.00386913750151475	-0.0367722
7905_30_HP_HPT	DDR1_Q08345_OID21009_v1_Neurology	115	Inverse variance weighted	0.179072	0.0459826	1.19611	1.09302	1.30891	9.85e-05	140	Inverse variance weighted	0.0431942	0.0120581	1.04414	1.01975	1.06911	0.000340751	397	Inverse variance weighted	-0.069507	0.00156486198222907	0.932854	0.894833	0.97249	0.00106043	0.179072	0.0431942	-0.069507	-0.0030023	0.182074655298631	-0.00606943	6.48301865377537e-05	-0.0167658	-0.0338937	0.000362033470636605
19361_78_MATN3_MATN3	MSR1_P21757_OID21063_v1_Neurology	90	Inverse variance weighted	0.134499	0.0622835	1.14396	1.0125	1.2925	0.0308138	96	Inverse variance weighted	0.0434085	0.0151174	1.04436	1.01387	1.07577	0.00408622	296	Inverse variance weighted	-0.0522868	0.00141475927979006	0.949057	0.905498	0.99471	0.0291642	0.134499	0.0434085	-0.0522868	-0.00226969	0.136768919211154	-0.00504262	0.000503237977234898	-0.0168751	-0.0374918	0.00374156774709019
19361_78_MATN3_MATN3	PECR_Q9BY49_OID30228_v1_Cardiometabolic_II	19	Inverse variance weighted	0.296853	0.114612	1.34562	1.07488	1.68454	0.00959588	17	Inverse variance weighted	0.0961291	0.0230156	1.1009	1.05234	1.1517	2.96e-05	296	Inverse variance weighted	-0.0522868	0.00254281589313729	0.949057	0.905498	0.99471	0.0291642	0.296853	0.0961291	-0.0522868	-0.00502628	0.301879186158623	-0.0100102	-4.236e-05	-0.0169319	-0.0337211	-0.000142697
16900_29_MDGA1_MDGA1	DDR1_Q08345_OID21009_v1_Neurology	115	Inverse variance weighted	0.179072	0.0459826	1.19611	1.09302	1.30891	9.85e-05	140	Inverse variance weighted	0.0866271	0.0261809	1.09049	1.03594	1.14791	0.000937007	483	Inverse variance weighted	-0.0356158	0.00233874865628248	0.965011	0.935159	0.995815	0.0263123	0.179072	0.0866271	-0.0356158	-0.0030853	0.182157652938089	-0.00766924	0.00149865042822467	-0.0172293	-0.0428276	0.00836896582867693
2516_57_CCL21_6Ckine	OGN_P20774_OID21123_v1_Neurology	87	Inverse variance weighted	-0.147658	0.0452421	0.862726	0.789518	0.942722	0.00109951	82	Inverse variance weighted	-0.0195787	0.00949033	0.980612	0.96254	0.999023	0.039111	107	Inverse variance weighted	-0.130167	0.00573039419459387	0.877948	0.805407	0.957024	0.00309297	-0.147658	-0.0195787	-0.130167	0.00254850977131426	-0.150207	-0.00868306	0.0137800823927182	-0.0172595	0.0588050509379894	-0.093324
11327_56_CLK2_CLK2	NME3_Q13232_OID20789_v1_Inflammation	57	Inverse variance weighted	-0.230789	0.0760443	0.793907	0.683974	0.92151	0.00240594	55	Inverse variance weighted	-0.0310312	0.015419	0.969445	0.940586	0.99919	0.0441639	73	Inverse variance weighted	-0.129043	0.00829487463215164	0.878936	0.775055	0.996741	0.0443391	-0.230789	-0.0310312	-0.129043	0.00400435970588893	-0.234793	-0.0122536	0.0202623139849061	-0.0173508	0.0530943968285551	-0.0877959
[truncated: 725 more rows]
