# Supplementary material for: Integrated multi-omics reveals the ITGB2-IL2RB-NK axis in promoting papillary thyroid carcinoma progression and immune microenvironment crosstalk
Source: Research Square preprint supplement (doi:10.21203/rs.3.rs-7218110/v1), 2025-08-21
Supplement: Supplementary file 3 [file d1a886be9b86c8720ec09392.xlsx]

## Sheet: Sheet1
Table S4. Causal associations between proteins and papillary thyroid carcinoma identified by UKB-PPP pQTL-based Mendelian randomization.
id	nsnp	method	b	se	or	or_lci95	or_uci95	pvalue
AAMDC_Q9H7C9_OID30236_v1_Cardiometabolic_II	70	Inverse variance weighted	0.0824031	0.0322565	1.08589	1.01937	1.15676	0.0106303
ACADSB_P45954_OID30356_v1_Cardiometabolic_II	26	Inverse variance weighted	0.256448	0.11324	1.29233	1.0351	1.61349	0.023535
ACY3_Q96HD9_OID30086_v1_Cardiometabolic_II	52	Inverse variance weighted	-0.134386	0.0677748	0.874253	0.765501	0.998454	0.0473869
ADAM12_O43184_OID30491_v1_Inflammation_II	20	Inverse variance weighted	0.280801	0.122448	1.32419	1.04165	1.68337	0.0218344
ADAM23_O75077_OID20651_v1_Inflammation	108	Inverse variance weighted	-0.0661019	0.0288822	0.936035	0.884519	0.990552	0.0220985
ADGRD1_Q6QNK2_OID30588_v1_Inflammation_II	66	Inverse variance weighted	0.115903	0.0486211	1.12289	1.02082	1.23516	0.0171351
ADGRE2_Q9UHX3_OID20755_v1_Inflammation	63	Inverse variance weighted	0.165183	0.0573781	1.17961	1.05414	1.32002	0.0039913
AFAP1_Q8N556_OID30569_v1_Inflammation_II	127	Inverse variance weighted	-0.0501362	0.0227322	0.9511	0.909654	0.994435	0.0274183
AHNAK2_Q8IVF2_OID30244_v1_Cardiometabolic_II	21	Inverse variance weighted	0.207201	0.0987607	1.23023	1.01372	1.49298	0.0359041
ALDH1A1_P00352_OID21128_v1_Neurology	8	Inverse variance weighted	0.641303	0.249505	1.89895	1.16448	3.09668	0.0101609
ALDH5A1_P51649_OID31047_v1_Neurology_II	11	Inverse variance weighted	0.446237	0.160841	1.56242	1.13995	2.14146	0.0055305
AMBN_Q9NP70_OID20437_v1_Inflammation	4	Inverse variance weighted	0.699642	0.332091	2.01303	1.04995	3.85951	0.0351367
AMBP_P02760_OID21413_v1_Oncology	57	Inverse variance weighted	0.396194	0.0894193	1.48616	1.24724	1.77084	9.39E-06
ANGPTL1_O95841_OID20211_v1_Cardiometabolic	60	Inverse variance weighted	0.114933	0.0563859	1.1218	1.00443	1.25289	0.0415166
ANGPTL3_Q9Y5C1_OID20407_v1_Cardiometabolic	51	Inverse variance weighted	0.210837	0.0749052	1.23471	1.06612	1.42997	0.00488205
AOC1_P19801_OID20452_v1_Inflammation	17	Inverse variance weighted	-0.291324	0.115648	0.747274	0.595714	0.937392	0.0117671
APOBR_Q0VD83_OID30246_v1_Cardiometabolic_II	141	Inverse variance weighted	-0.0493939	0.0201023	0.951806	0.915034	0.990056	0.014005
APOF_Q13790_OID30701_v1_Inflammation_II	29	Inverse variance weighted	-0.298367	0.114297	0.742029	0.593102	0.928351	0.00904207
APOM_O95445_OID20374_v1_Cardiometabolic	86	Inverse variance weighted	-0.152514	0.0750429	0.858547	0.741116	0.994585	0.0421173
ARHGAP1_Q07960_OID21202_v1_Oncology	13	Inverse variance weighted	0.544924	0.208483	1.72448	1.14602	2.59491	0.00895521
ARHGAP45_Q92619_OID30653_v1_Inflammation_II	4	Inverse variance weighted	-0.725277	0.318682	0.48419	0.259268	0.904241	0.0228543
ASPN_Q9BXN1_OID30315_v1_Cardiometabolic_II	45	Inverse variance weighted	0.306052	0.0927421	1.35805	1.13233	1.62877	0.000966728
AXL_P30530_OID20363_v1_Cardiometabolic	59	Inverse variance weighted	0.287221	0.0857822	1.33272	1.12647	1.57673	0.000813219
B2M_P61769_OID30725_v1_Inflammation_II	97	Inverse variance weighted	-0.156703	0.0582578	0.854958	0.762702	0.958373	0.00714902
B3GNT7_Q8NFL0_OID30281_v1_Cardiometabolic_II	115	Inverse variance weighted	-0.104199	0.039087	0.901046	0.834594	0.972789	0.00768009
BPIFB1_Q8TDL5_OID20308_v1_Cardiometabolic	113	Inverse variance weighted	-0.11585	0.0439102	0.890609	0.817165	0.970653	0.00833121
BTN1A1_Q13410_OID31363_v1_Oncology_II	22	Inverse variance weighted	-0.247452	0.108016	0.780788	0.631812	0.964891	0.0219702
BTN2A1_Q7KYR7_OID20713_v1_Inflammation	133	Inverse variance weighted	-0.145131	0.0390027	0.864909	0.801255	0.93362	0.000198394
BTN3A2_P78410_OID20540_v1_Inflammation	215	Inverse variance weighted	0.0703411	0.0241848	1.07287	1.0232	1.12496	0.00363178
C1RL_Q9NZP8_OID30721_v1_Inflammation_II	56	Inverse variance weighted	-0.112481	0.057157	0.893614	0.798908	0.999547	0.0490756
C7orf50_Q9BRJ6_OID31095_v1_Neurology_II	32	Inverse variance weighted	-0.122352	0.0563814	0.884837	0.792265	0.988225	0.0300008
C9_P02748_OID30698_v1_Inflammation_II	17	Inverse variance weighted	-0.41225	0.170438	0.662159	0.474114	0.924788	0.0155732
CACYBP_Q9HB71_OID30649_v1_Inflammation_II	10	Inverse variance weighted	-0.452945	0.224051	0.635753	0.409801	0.986289	0.0432158
CAPG_P40121_OID21431_v1_Oncology	104	Inverse variance weighted	-0.0800398	0.030468	0.92308	0.86957	0.979883	0.0086138
CAPS_Q13938_OID31126_v1_Neurology_II	66	Inverse variance weighted	0.378619	0.0791154	1.46027	1.25051	1.7052	1.70E-06
CASP2_P42575_OID20555_v1_Inflammation	4	Inverse variance weighted	-0.863957	0.422698	0.421491	0.184069	0.965154	0.0409626
CASP4_P49662_OID31276_v1_Oncology_II	7	Inverse variance weighted	-0.496491	0.205301	0.608663	0.407025	0.91019	0.0155906
CAT_P04040_OID30712_v1_Inflammation_II	17	Inverse variance weighted	0.293155	0.137719	1.34065	1.0235	1.75608	0.0332836
CCDC80_Q76M96_OID20226_v1_Cardiometabolic	32	Inverse variance weighted	0.346036	0.121139	1.41345	1.11472	1.79224	0.00428298
CCL16_O15467_OID20334_v1_Cardiometabolic	65	Inverse variance weighted	0.119763	0.0496293	1.12723	1.02274	1.24239	0.0158158
CCL18_P55774_OID20395_v1_Cardiometabolic	39	Inverse variance weighted	-0.131072	0.0571615	0.877154	0.784186	0.981144	0.0218471
CCL19_Q99731_OID21030_v1_Neurology	61	Inverse variance weighted	0.149329	0.0754646	1.16105	1.00142	1.34614	0.0478392
CCL21_O00585_OID20686_v1_Inflammation	52	Inverse variance weighted	-0.245225	0.0979352	0.782528	0.645856	0.948122	0.0122814
CCL7_P80098_OID20523_v1_Inflammation	40	Inverse variance weighted	0.274025	0.0826917	1.31525	1.11846	1.54666	0.000920314
CD1C_P29017_OID21483_v1_Oncology	138	Inverse variance weighted	-0.162956	0.0490969	0.849629	0.77168	0.935452	0.000903192
CD244_Q9BZW8_OID20628_v1_Inflammation	76	Inverse variance weighted	0.163969	0.0726562	1.17818	1.0218	1.35849	0.0240221
CD27_P26842_OID21527_v1_Oncology	42	Inverse variance weighted	0.179611	0.0807451	1.19675	1.02158	1.40196	0.02612
CD300A_Q9UGN4_OID30576_v1_Inflammation_II	92	Inverse variance weighted	0.139548	0.0511993	1.14975	1.03998	1.27112	0.00641898
CD302_Q8IX05_OID21328_v1_Oncology	84	Inverse variance weighted	-0.215996	0.071898	0.805739	0.699832	0.927673	0.00266285
CD7_P09564_OID30543_v1_Inflammation_II	46	Inverse variance weighted	0.164392	0.0553605	1.17868	1.05748	1.31377	0.00298306
CD84_Q9UIB8_OID20607_v1_Inflammation	39	Inverse variance weighted	-0.269049	0.11015	0.764106	0.615732	0.948234	0.0145835
CD8A_P01732_OID21018_v1_Neurology	126	Inverse variance weighted	0.21591	0.0425404	1.24099	1.14171	1.3489	3.87E-07
CDC27_P30260_OID21238_v1_Oncology	3	Inverse variance weighted	-1.11501	0.448763	0.327913	0.13607	0.79023	0.0129689
CDH6_P55285_OID20157_v1_Cardiometabolic	112	Inverse variance weighted	-0.0926868	0.0360208	0.911479	0.849347	0.978156	0.0100779
CEACAM1_P13688_OID21528_v1_Oncology	41	Inverse variance weighted	0.159607	0.0614366	1.17305	1.03997	1.32316	0.00937905
CEACAM16_Q2WEN9_OID31495_v1_Oncology_II	87	Inverse variance weighted	-0.161516	0.0444353	0.850853	0.779885	0.928279	0.000278141
CEACAM19_Q7Z692_OID31443_v1_Oncology_II	28	Inverse variance weighted	0.231291	0.112337	1.26023	1.01117	1.57062	0.0395034
CEACAM21_Q3KPI0_OID20548_v1_Inflammation	128	Inverse variance weighted	-0.0636989	0.0202985	0.938288	0.90169	0.97637	0.00170045
CEACAM6_P40199_OID30362_v1_Cardiometabolic_II	57	Inverse variance weighted	0.192627	0.0816074	1.21243	1.03322	1.42273	0.0182548
CES1_P23141_OID20244_v1_Cardiometabolic	56	Inverse variance weighted	-0.134492	0.0621073	0.87416	0.77397	0.987319	0.0303509
CFHR2_P36980_OID30720_v1_Inflammation_II	122	Inverse variance weighted	-0.0598221	0.0248358	0.941932	0.897179	0.988918	0.0160092
CFHR4_Q92496_OID30758_v1_Inflammation_II	155	Inverse variance weighted	-0.0681649	0.0235047	0.934106	0.892049	0.978147	0.00373102
CFHR5_Q9BXR6_OID30716_v1_Inflammation_II	82	Inverse variance weighted	-0.0815354	0.0383395	0.9217	0.854977	0.99363	0.0334479
CFP_P27918_OID30784_v1_Inflammation_II	58	Inverse variance weighted	0.186364	0.0720744	1.20486	1.04613	1.38767	0.00971776
CGA_P01215_OID21069_v1_Neurology	3	Inverse variance weighted	1.457	0.597499	4.29307	1.33096	13.8474	0.0147483
CGREF1_Q99674_OID20152_v1_Cardiometabolic	136	Inverse variance weighted	0.083269	0.0393474	1.08683	1.00617	1.17397	0.0343232
CHI3L1_P36222_OID20399_v1_Cardiometabolic	60	Inverse variance weighted	-0.151464	0.0453648	0.859449	0.78633	0.939367	0.000841387
CHL1_O00533_OID20366_v1_Cardiometabolic	72	Inverse variance weighted	0.101229	0.0500848	1.10653	1.00307	1.22066	0.043263
CHRDL1_Q9BU40_OID20771_v1_Inflammation	9	Inverse variance weighted	0.596851	0.268521	1.81639	1.0731	3.07453	0.0262338
CKMT1A_CKMT1B_P12532_OID20721_v1_Inflammation	27	Inverse variance weighted	0.36466	0.131129	1.44002	1.11365	1.86204	0.00542039
CLEC11A_Q9Y240_OID21112_v1_Neurology	31	Inverse variance weighted	0.182709	0.0882173	1.20046	1.00985	1.42706	0.0383474
CLEC3B_P05452_OID30756_v1_Inflammation_II	29	Inverse variance weighted	0.214559	0.09367	1.23932	1.03145	1.48907	0.0219873
CLEC6A_Q6EIG7_OID21228_v1_Oncology	72	Inverse variance weighted	0.11698	0.04861	1.1241	1.02194	1.23646	0.016106
CLMP_Q9H6B4_OID21419_v1_Oncology	45	Inverse variance weighted	0.164869	0.0739198	1.17924	1.02019	1.36309	0.0257221
CLPS_P04118_OID21156_v1_Neurology	129	Inverse variance weighted	0.156527	0.0416	1.16944	1.07787	1.26879	0.000168115
CNTN2_Q02246_OID21426_v1_Oncology	113	Inverse variance weighted	-0.0633912	0.0306044	0.938576	0.883931	0.996599	0.0383299
CNTN4_Q8IWV2_OID21117_v1_Neurology	91	Inverse variance weighted	0.119058	0.0592393	1.12644	1.00295	1.26512	0.0444535
CNTNAP2_Q9UHC6_OID20556_v1_Inflammation	96	Inverse variance weighted	-0.118821	0.0413439	0.887966	0.818849	0.962918	0.00405339
COL3A1_P02461_OID30379_v1_Cardiometabolic_II	19	Inverse variance weighted	0.261082	0.12232	1.29833	1.02156	1.65009	0.032808
COL5A1_P20908_OID30587_v1_Inflammation_II	44	Inverse variance weighted	0.262694	0.0852886	1.30043	1.10024	1.53704	0.00206958
COL6A3_P12111_OID20292_v1_Cardiometabolic	10	Inverse variance weighted	0.691671	0.226216	1.99705	1.28183	3.11134	0.00223142
COX6B1_P14854_OID30317_v1_Cardiometabolic_II	3	Inverse variance weighted	1.26082	0.452475	3.5283	1.45349	8.56485	0.00532827
CPA1_P15085_OID20280_v1_Cardiometabolic	78	Inverse variance weighted	-0.151285	0.0687769	0.859602	0.751196	0.983652	0.0278314
CPA4_Q9UI42_OID30606_v1_Inflammation_II	76	Inverse variance weighted	-0.091213	0.0444309	0.912823	0.836693	0.99588	0.0400807
CR1_P17927_OID30697_v1_Inflammation_II	105	Inverse variance weighted	0.11408	0.0377026	1.12084	1.041	1.20681	0.00247995
CR2_P20023_OID20393_v1_Cardiometabolic	118	Inverse variance weighted	0.141344	0.0686047	1.15182	1.0069	1.3176	0.0393726
CRELD2_Q6UXH1_OID20751_v1_Inflammation	73	Inverse variance weighted	-0.154382	0.0591511	0.856944	0.763136	0.962283	0.00905502
CRISP3_P54108_OID30715_v1_Inflammation_II	190	Inverse variance weighted	0.105756	0.0346923	1.11155	1.03848	1.18976	0.00230056
CRTAP_O75718_OID30902_v1_Neurology_II	25	Inverse variance weighted	0.29047	0.142377	1.33706	1.01148	1.76743	0.0413353
CSF2_P04141_OID30072_v1_Cardiometabolic_II	24	Inverse variance weighted	0.218389	0.103953	1.24407	1.01475	1.52522	0.0356554
CSF2RB_P32927_OID30553_v1_Inflammation_II	77	Inverse variance weighted	-0.0474472	0.0240575	0.953661	0.909737	0.999706	0.0485823
CSNK1D_P48730_OID30492_v1_Inflammation_II	15	Inverse variance weighted	0.396982	0.192446	1.48733	1.01998	2.1688	0.0391297
CSTB_P04080_OID20294_v1_Cardiometabolic	66	Inverse variance weighted	-0.0710965	0.0349638	0.931372	0.869684	0.997436	0.0420089
CTBS_Q01459_OID30710_v1_Inflammation_II	101	Inverse variance weighted	0.101137	0.0392149	1.10643	1.02457	1.19482	0.00990743
CTSB_P07858_OID20276_v1_Cardiometabolic	335	Inverse variance weighted	-0.361109	0.0231564	0.696903	0.66598	0.729262	7.95E-55
CTSS_P25774_OID21056_v1_Neurology	78	Inverse variance weighted	0.114795	0.0524997	1.12164	1.01197	1.24321	0.0287721
CTSZ_Q9UBR2_OID20365_v1_Cardiometabolic	61	Inverse variance weighted	0.188652	0.0563973	1.20762	1.08124	1.34877	0.000822675
CWC15_Q9P013_OID31479_v1_Oncology_II	9	Inverse variance weighted	0.564993	0.275356	1.75944	1.02562	3.01829	0.0401828
DCBLD2_Q96PD2_OID21474_v1_Oncology	82	Inverse variance weighted	-0.170867	0.0743828	0.842934	0.72858	0.975235	0.0216113
DDR1_Q08345_OID21009_v1_Neurology	115	Inverse variance weighted	0.179072	0.0459826	1.19611	1.09302	1.30891	9.85E-05
DKK3_Q9UBP4_OID20264_v1_Cardiometabolic	83	Inverse variance weighted	0.11859	0.0547959	1.12591	1.01125	1.25356	0.0304478
DNAJA2_O60884_OID20627_v1_Inflammation	6	Inverse variance weighted	-0.85409	0.427118	0.425671	0.184291	0.983204	0.0455373
DNAJA4_Q8WW22_OID31130_v1_Neurology_II	14	Inverse variance weighted	0.530011	0.166326	1.69895	1.22631	2.35375	0.00143965
DNER_Q8NFT8_OID20712_v1_Inflammation	71	Inverse variance weighted	-0.161963	0.0658477	0.850473	0.747497	0.967634	0.0139068
DPP10_Q8N608_OID20527_v1_Inflammation	56	Inverse variance weighted	0.144531	0.0679478	1.1555	1.01142	1.3201	0.033413
DPP6_P42658_OID21354_v1_Oncology	45	Inverse variance weighted	-0.213294	0.0793609	0.807918	0.691535	0.943889	0.00719566
DSG2_Q14126_OID21113_v1_Neurology	69	Inverse variance weighted	-0.125918	0.060849	0.881687	0.782562	0.993368	0.0385126
DSG3_P32926_OID21460_v1_Oncology	82	Inverse variance weighted	0.171153	0.0707536	1.18667	1.03301	1.36319	0.015563
DYNC1H1_Q14204_OID31341_v1_Oncology_II	16	Inverse variance weighted	0.301841	0.10575	1.35235	1.09919	1.66381	0.00431321
DYNLT1_P63172_OID30925_v1_Neurology_II	129	Inverse variance weighted	0.0923145	0.034651	1.09671	1.0247	1.17378	0.00771899
DYNLT3_P51808_OID31415_v1_Oncology_II	25	Inverse variance weighted	0.283266	0.0948442	1.32746	1.10227	1.59865	0.00282056
ECHDC3_Q96DC8_OID30293_v1_Cardiometabolic_II	68	Inverse variance weighted	0.144292	0.050965	1.15522	1.0454	1.27658	0.0046373
ECHS1_P30084_OID30239_v1_Cardiometabolic_II	17	Inverse variance weighted	0.40456	0.191952	1.49864	1.02874	2.18319	0.0350646
ECM1_Q16610_OID30736_v1_Inflammation_II	78	Inverse variance weighted	-0.162993	0.0417233	0.849597	0.782884	0.921995	9.36E-05
EDA2R_Q9HAV5_OID21451_v1_Oncology	13	Inverse variance weighted	-1.15278	0.410392	0.315757	0.14126	0.705808	0.00496995
EDAR_Q9UNE0_OID20525_v1_Inflammation	119	Inverse variance weighted	0.156962	0.0473518	1.16995	1.06625	1.28373	0.000917066
EDF1_O60869_OID31010_v1_Neurology_II	5	Inverse variance weighted	1.29145	0.430072	3.63806	1.56598	8.4519	0.00267444
EIF2AK2_P19525_OID31442_v1_Oncology_II	14	Inverse variance weighted	-0.54209	0.194564	0.581531	0.397152	0.85151	0.00533341
EIF4G1_Q04637_OID20625_v1_Inflammation	5	Inverse variance weighted	-0.76391	0.332738	0.465841	0.242664	0.894273	0.0216855
ENO3_P13929_OID30209_v1_Cardiometabolic_II	26	Inverse variance weighted	0.335617	0.139939	1.3988	1.06326	1.84024	0.0164707
ENPP7_Q6UWV6_OID20689_v1_Inflammation	68	Inverse variance weighted	0.0739476	0.0285971	1.07675	1.01806	1.13883	0.00971415
ENSA_O43768_OID31355_v1_Oncology_II	3	Inverse variance weighted	-0.885688	0.412163	0.41243	0.18387	0.925104	0.0316439
ENTPD2_Q9Y5L3_OID21260_v1_Oncology	53	Inverse variance weighted	-0.0980023	0.0489473	0.906647	0.823708	0.997937	0.0452633
ENTPD6_O75354_OID20100_v1_Cardiometabolic	105	Inverse variance weighted	-0.148172	0.0388169	0.862283	0.799113	0.930447	0.000134981
EPO_P01588_OID20522_v1_Inflammation	36	Inverse variance weighted	-0.214587	0.10277	0.806874	0.659669	0.986929	0.0367954
ERBB4_Q15303_OID21510_v1_Oncology	81	Inverse variance weighted	-0.149598	0.0671358	0.861054	0.754889	0.98215	0.0258613
F10_P00742_OID30684_v1_Inflammation_II	39	Inverse variance weighted	0.213711	0.100264	1.23826	1.01734	1.50716	0.0330499
F13B_P05160_OID30781_v1_Inflammation_II	80	Inverse variance weighted	-0.103995	0.0466671	0.90123	0.822455	0.987551	0.0258515
F7_P08709_OID20372_v1_Cardiometabolic	70	Inverse variance weighted	-0.126841	0.0486577	0.880873	0.800747	0.969018	0.00913902
FABP6_P51161_OID20076_v1_Cardiometabolic	48	Inverse variance weighted	0.221976	0.0943468	1.24854	1.03775	1.50215	0.0186344
FABP9_Q0Z7S8_OID20501_v1_Inflammation	111	Inverse variance weighted	-0.210374	0.0456734	0.810281	0.740897	0.886163	4.10E-06
FAM172A_Q8WUF8_OID30248_v1_Cardiometabolic_II	16	Inverse variance weighted	0.6247	0.311329	1.86769	1.0146	3.43805	0.0447965
FAS_P25445_OID20316_v1_Cardiometabolic	38	Inverse variance weighted	0.166862	0.0810422	1.18159	1.00805	1.38501	0.0394993
FASLG_P48023_OID20665_v1_Inflammation	136	Inverse variance weighted	0.159159	0.0621753	1.17252	1.038	1.32448	0.0104719
FCGR2B_P31994_OID21215_v1_Oncology	59	Inverse variance weighted	0.145178	0.0531966	1.15625	1.04176	1.28331	0.00635109
FCN1_O00602_OID30690_v1_Inflammation_II	96	Inverse variance weighted	0.101372	0.0502602	1.10669	1.00287	1.22126	0.0437008
FGFBP2_Q9BYJ0_OID30395_v1_Cardiometabolic_II	132	Inverse variance weighted	0.0695324	0.0307367	1.07201	1.00933	1.13857	0.0236855
FLT3LG_P49771_OID20661_v1_Inflammation	86	Inverse variance weighted	-0.161176	0.0798605	0.851142	0.727819	0.995362	0.0435687
FSHB_P01225_OID30233_v1_Cardiometabolic_II	10	Inverse variance weighted	0.478568	0.210494	1.61376	1.06823	2.4379	0.0229935
FST_P19883_OID20770_v1_Inflammation	20	Inverse variance weighted	-0.317046	0.135903	0.728297	0.557989	0.950586	0.019654
GALNT2_Q10471_OID21423_v1_Oncology	101	Inverse variance weighted	0.136276	0.0475626	1.146	1.04399	1.25797	0.00416766
GASK1A_Q9UFP1_OID30109_v1_Cardiometabolic_II	97	Inverse variance weighted	-0.0829734	0.0315005	0.920376	0.865269	0.978991	0.00843771
GGH_Q92820_OID20416_v1_Cardiometabolic	116	Inverse variance weighted	0.168732	0.0409451	1.1838	1.09251	1.28272	3.77E-05
GGT1_P19440_OID21075_v1_Neurology	50	Inverse variance weighted	-0.252224	0.0808974	0.777071	0.663131	0.910588	0.0018219
GIMAP7_Q8NHV1_OID30639_v1_Inflammation_II	56	Inverse variance weighted	0.150397	0.0458436	1.1623	1.06241	1.27157	0.00103568
GIMAP8_Q8ND71_OID31194_v1_Oncology_II	10	Inverse variance weighted	0.438582	0.173228	1.55051	1.10413	2.17735	0.0113473
GLB1_P16278_OID20949_v1_Neurology	63	Inverse variance weighted	0.138124	0.0590407	1.14812	1.02266	1.28897	0.0193113
GNE_Q9Y223_OID21231_v1_Oncology	6	Inverse variance weighted	-0.658768	0.25607	0.517489	0.313278	0.854815	0.0100937
GYS1_P13807_OID20097_v1_Cardiometabolic	182	Inverse variance weighted	-0.611217	0.0376385	0.54269	0.504096	0.584239	2.67E-59
GZMA_P12544_OID20663_v1_Inflammation	105	Inverse variance weighted	0.133182	0.0581326	1.14246	1.01943	1.28034	0.021963
HCG22_E2RYF7_OID30088_v1_Cardiometabolic_II	100	Inverse variance weighted	-0.105074	0.0441295	0.900258	0.825664	0.981592	0.0172641
HDGFL2_Q7Z4V5_OID31136_v1_Neurology_II	8	Inverse variance weighted	-0.621403	0.241678	0.53719	0.334509	0.862679	0.0101348
HLA-A_P04439_OID31048_v1_Neurology_II	285	Inverse variance weighted	-0.0519599	0.0146298	0.949367	0.922531	0.976983	0.000382816
HSPB1_P04792_OID20230_v1_Cardiometabolic	68	Inverse variance weighted	-0.114921	0.0515349	0.891436	0.805792	0.986183	0.0257495
HSPG2_P98160_OID20383_v1_Cardiometabolic	20	Inverse variance weighted	0.24177	0.120376	1.2735	1.00585	1.61237	0.0445951
ICAM3_P32942_OID20277_v1_Cardiometabolic	168	Inverse variance weighted	0.171889	0.0444226	1.18755	1.08852	1.29558	0.000109099
IFIT3_O14879_OID31283_v1_Oncology_II	17	Inverse variance weighted	0.332106	0.140452	1.3939	1.05847	1.83564	0.0180515
IGF2R_P11717_OID21146_v1_Neurology	99	Inverse variance weighted	0.0986377	0.0477835	1.10367	1.00499	1.21203	0.0389928
IGFBPL1_Q8WX77_OID20155_v1_Cardiometabolic	74	Inverse variance weighted	0.0986529	0.0421241	1.10368	1.01622	1.19867	0.0191827
IL10_P22301_OID20431_v1_Inflammation	37	Inverse variance weighted	-0.254153	0.118771	0.775573	0.614501	0.978864	0.0323662
IL15_P40933_OID20562_v1_Inflammation	87	Inverse variance weighted	-0.176418	0.067878	0.838268	0.733844	0.95755	0.00934837
IL1RL1_Q01638_OID20250_v1_Cardiometabolic	141	Inverse variance weighted	0.0671546	0.0341766	1.06946	1.00017	1.14355	0.0494223
IL5RA_Q01344_OID20601_v1_Inflammation	168	Inverse variance weighted	0.0992861	0.0434308	1.10438	1.01426	1.20251	0.0222497
INHBB_P09529_OID30625_v1_Inflammation_II	41	Inverse variance weighted	-0.137812	0.0693397	0.871263	0.760547	0.998096	0.0468689
INHBC_P55103_OID21093_v1_Neurology	92	Inverse variance weighted	0.0985178	0.0440604	1.10353	1.01223	1.20307	0.0253537
INPP5D_Q92835_OID30259_v1_Cardiometabolic_II	11	Inverse variance weighted	-0.763928	0.206162	0.465833	0.310987	0.697781	0.000210997
IPCEF1_Q8WWN9_OID20977_v1_Neurology	7	Inverse variance weighted	-0.572391	0.278585	0.564175	0.326796	0.973981	0.0399144
ITGB2_P05107_OID20315_v1_Cardiometabolic	53	Inverse variance weighted	0.214538	0.0900278	1.23929	1.03882	1.47845	0.0171713
ITGB6_P18564_OID20493_v1_Inflammation	62	Inverse variance weighted	0.243505	0.072377	1.27571	1.10699	1.47015	0.000767114
ITGBL1_O95965_OID30408_v1_Cardiometabolic_II	76	Inverse variance weighted	-0.111669	0.0486193	0.894341	0.81305	0.983759	0.0216305
ITIH4_Q14624_OID30762_v1_Inflammation_II	43	Inverse variance weighted	-0.161842	0.0737425	0.850576	0.736109	0.982842	0.0281859
JCHAIN_P01591_OID20494_v1_Inflammation	47	Inverse variance weighted	-0.304939	0.120508	0.737169	0.582088	0.933566	0.0113917
KAZALD1_Q96I82_OID21339_v1_Oncology	93	Inverse variance weighted	0.118328	0.039556	1.12561	1.04164	1.21635	0.00277706
KDM3A_Q9Y4C1_OID30426_v1_Inflammation_II	15	Inverse variance weighted	-0.482031	0.205717	0.617528	0.412617	0.9242	0.0191202
KDR_P35968_OID21497_v1_Oncology	124	Inverse variance weighted	0.133368	0.0383777	1.14267	1.05987	1.23194	0.0005106
KIR2DL2_P43627_OID31431_v1_Oncology_II	221	Inverse variance weighted	-0.0529778	0.0261742	0.948401	0.900974	0.998325	0.0429652
KIR2DL3_P43628_OID21196_v1_Oncology	209	Inverse variance weighted	-0.0560768	0.0248022	0.945467	0.900604	0.992563	0.023762
KLB_Q86Z14_OID20888_v1_Neurology	161	Inverse variance weighted	-0.0629032	0.0298052	0.939034	0.885749	0.995525	0.0348172
KLF4_O43474_OID30808_v1_Neurology_II	3	Inverse variance weighted	0.908238	0.440012	2.47995	1.04688	5.87474	0.039006
KLK3_P07288_OID30364_v1_Cardiometabolic_II	6	Inverse variance weighted	1.48508	0.539597	4.4153	1.53337	12.7138	0.0059197
KLKB1_P03952_OID30760_v1_Inflammation_II	87	Inverse variance weighted	0.0939924	0.0444067	1.09855	1.00698	1.19845	0.0342917
LACRT_Q9GZZ8_OID31367_v1_Oncology_II	24	Inverse variance weighted	0.289173	0.123943	1.33532	1.04733	1.70251	0.0196424
LAG3_P18627_OID21315_v1_Oncology	59	Inverse variance weighted	0.295403	0.0825665	1.34367	1.1429	1.5797	0.000346558
LAIR2_Q6ISS4_OID20965_v1_Neurology	87	Inverse variance weighted	0.0882122	0.0340726	1.09222	1.02166	1.16765	0.0096269
LAMP3_Q9UQV4_OID20638_v1_Inflammation	47	Inverse variance weighted	0.322849	0.0879173	1.38106	1.16245	1.64077	0.000240486
LBP_P18428_OID20355_v1_Cardiometabolic	69	Inverse variance weighted	0.109608	0.0415125	1.11584	1.02865	1.21043	0.00828197
LECT2_O14960_OID30320_v1_Cardiometabolic_II	113	Inverse variance weighted	-0.0865149	0.0367379	0.917122	0.853405	0.985596	0.0185268
LGALS1_P09382_OID20154_v1_Cardiometabolic	30	Inverse variance weighted	0.262312	0.0831253	1.29993	1.10449	1.52995	0.00160155
LGALS4_P56470_OID20748_v1_Inflammation	60	Inverse variance weighted	0.122284	0.0541971	1.13008	1.01619	1.25673	0.0240528
LGALS9_O00182_OID20781_v1_Inflammation	78	Inverse variance weighted	0.105948	0.0481325	1.11176	1.01168	1.22175	0.0277235
LHPP_Q9H008_OID20749_v1_Inflammation	53	Inverse variance weighted	-0.104569	0.0506965	0.900713	0.815516	0.99481	0.0391468
LIPF_P07098_OID30266_v1_Cardiometabolic_II	57	Inverse variance weighted	-0.146122	0.0619149	0.864052	0.765309	0.975535	0.0182726
LRRN1_Q6UXK5_OID20438_v1_Inflammation	103	Inverse variance weighted	0.0783139	0.0390483	1.08146	1.00178	1.16748	0.0449023
LTB_Q06643_OID31383_v1_Oncology_II	65	Inverse variance weighted	0.203691	0.0727948	1.22592	1.06291	1.41392	0.00513951
LY75_O60449_OID20580_v1_Inflammation	173	Inverse variance weighted	0.115247	0.0206121	1.12215	1.07772	1.16841	2.25E-08
MAMDC2_Q7Z304_OID30309_v1_Cardiometabolic_II	61	Inverse variance weighted	0.173021	0.0789199	1.18889	1.01851	1.38778	0.0283528
MAN2B2_Q9Y2E5_OID30306_v1_Cardiometabolic_II	139	Inverse variance weighted	0.107976	0.0299187	1.11402	1.05057	1.1813	0.000307391
MANSC4_A6NHS7_OID30141_v1_Cardiometabolic_II	135	Inverse variance weighted	0.0879788	0.0334997	1.09196	1.02257	1.16607	0.00863294
MATN3_O15232_OID20979_v1_Neurology	89	Inverse variance weighted	-0.0841588	0.0386753	0.919285	0.852176	0.99168	0.0295529
MBL2_P11226_OID30759_v1_Inflammation_II	134	Inverse variance weighted	-0.0583668	0.0292717	0.943304	0.890707	0.999006	0.0461557
MCAM_P43121_OID20343_v1_Cardiometabolic	33	Inverse variance weighted	0.245756	0.122222	1.27859	1.00622	1.62468	0.0443524
MDM1_Q8TC05_OID30945_v1_Neurology_II	9	Inverse variance weighted	0.311242	0.156076	1.36512	1.00535	1.85364	0.046134
MEP1B_Q16820_OID20168_v1_Cardiometabolic	147	Inverse variance weighted	-0.0603294	0.0269136	0.941454	0.893079	0.99245	0.0249876
MERTK_Q12866_OID20657_v1_Inflammation	91	Inverse variance weighted	-0.153175	0.0611574	0.857979	0.76106	0.967242	0.0122589
MFAP3L_O75121_OID30933_v1_Neurology_II	3	Inverse variance weighted	-0.266156	0.122465	0.76632	0.60279	0.974214	0.029756
MIA_Q16674_OID21531_v1_Oncology	92	Inverse variance weighted	-0.109323	0.0345502	0.896441	0.837745	0.95925	0.0015553
MILR1_Q7Z6M3_OID20482_v1_Inflammation	114	Inverse variance weighted	0.0790417	0.0362447	1.08225	1.00803	1.16193	0.0291998
MME_P08473_OID21307_v1_Oncology	89	Inverse variance weighted	-0.142375	0.0482966	0.867296	0.788962	0.953406	0.00319901
MMP10_P09238_OID20687_v1_Inflammation	92	Inverse variance weighted	0.108007	0.0455458	1.11406	1.01891	1.21808	0.0177208
MMP12_P39900_OID21439_v1_Oncology	84	Inverse variance weighted	-0.0886758	0.0373793	0.915142	0.850493	0.984706	0.0176767
MMUT_P22033_OID30159_v1_Cardiometabolic_II	6	Inverse variance weighted	0.677645	0.254559	1.96924	1.19567	3.24326	0.00776686
MPO_P05164_OID21100_v1_Neurology	42	Inverse variance weighted	0.151043	0.0731093	1.16305	1.00778	1.34224	0.038829
MRC1_P22897_OID30694_v1_Inflammation_II	64	Inverse variance weighted	0.211979	0.0989024	1.23612	1.0183	1.50054	0.0320881
MSMB_P08118_OID20275_v1_Cardiometabolic	147	Inverse variance weighted	-0.157723	0.0311066	0.854087	0.80357	0.907779	3.97E-07
MSR1_P21757_OID21063_v1_Neurology	90	Inverse variance weighted	0.134499	0.0622835	1.14396	1.0125	1.2925	0.0308138
MST1_P26927_OID30713_v1_Inflammation_II	186	Inverse variance weighted	-0.0619263	0.0216835	0.939952	0.900842	0.980761	0.00429115
MTHFD2_P13995_OID31078_v1_Neurology_II	8	Inverse variance weighted	-0.464705	0.22855	0.628321	0.401454	0.983393	0.0420248
NAP1L4_Q99733_OID31475_v1_Oncology_II	31	Inverse variance weighted	-0.239571	0.104612	0.786966	0.641074	0.966058	0.022016
NCAM2_O15394_OID21095_v1_Neurology	123	Inverse variance weighted	-0.141479	0.0369921	0.868074	0.807362	0.933351	0.000131002
NCAN_O14594_OID21055_v1_Neurology	43	Inverse variance weighted	-0.215547	0.102624	0.8061	0.659225	0.9857	0.0356978
NCF2_P19878_OID20567_v1_Inflammation	15	Inverse variance weighted	0.294592	0.140652	1.34258	1.01909	1.76874	0.0362172
NCR1_O76036_OID20566_v1_Inflammation	79	Inverse variance weighted	0.191318	0.065986	1.21084	1.06395	1.37802	0.00373912
NCR3LG1_Q68D85_OID31490_v1_Oncology_II	122	Inverse variance weighted	0.140281	0.0449706	1.1506	1.05352	1.25662	0.00181228
NECTIN1_Q15223_OID30545_v1_Inflammation_II	9	Inverse variance weighted	0.50721	0.239105	1.66065	1.03932	2.65344	0.033898
NME3_Q13232_OID20789_v1_Inflammation	57	Inverse variance weighted	-0.230789	0.0760443	0.793907	0.683974	0.92151	0.00240594
NPDC1_Q9NQX5_OID20205_v1_Cardiometabolic	20	Inverse variance weighted	0.359905	0.136668	1.43319	1.0964	1.87344	0.00845298
NPTX1_Q15818_OID21074_v1_Neurology	161	Inverse variance weighted	0.129686	0.0339902	1.13847	1.0651	1.2169	0.000135962
NSFL1C_Q9UNZ2_OID21022_v1_Neurology	8	Inverse variance weighted	-0.71421	0.249968	0.489579	0.299948	0.799096	0.0042738
NT5C_Q8TCD5_OID30294_v1_Cardiometabolic_II	35	Inverse variance weighted	-0.189963	0.0722144	0.826989	0.717844	0.952731	0.00852475
NUCB2_P80303_OID21448_v1_Oncology	55	Inverse variance weighted	0.221168	0.0695848	1.24753	1.08848	1.42983	0.00148089
OGN_P20774_OID21123_v1_Neurology	87	Inverse variance weighted	-0.147658	0.0452421	0.862726	0.789518	0.942722	0.00109951
OMP_P47874_OID30835_v1_Neurology_II	9	Inverse variance weighted	0.35309	0.12821	1.42346	1.10716	1.83012	0.00588739
OPLAH_O14841_OID30201_v1_Cardiometabolic_II	24	Inverse variance weighted	0.300041	0.131475	1.34991	1.04326	1.74671	0.022483
PAGR1_Q9BTK6_OID30206_v1_Cardiometabolic_II	4	Inverse variance weighted	1.17214	0.342598	3.22889	1.64979	6.31944	0.000623186
PALM2_Q8IXS6_OID31096_v1_Neurology_II	26	Inverse variance weighted	0.204126	0.103467	1.22645	1.00133	1.50219	0.0485105
PAMR1_Q6UXH9_OID21153_v1_Neurology	157	Inverse variance weighted	0.131943	0.0450314	1.14104	1.04465	1.24633	0.00338928
PARP1_P09874_OID20500_v1_Inflammation	9	Inverse variance weighted	0.463133	0.161457	1.58904	1.15798	2.18057	0.00412471
PCDHB15_Q9Y5E8_OID31377_v1_Oncology_II	85	Inverse variance weighted	-0.138503	0.041758	0.87066	0.802239	0.944917	0.00091051
PDIA5_Q14554_OID31209_v1_Oncology_II	81	Inverse variance weighted	-0.132765	0.0559546	0.875671	0.784714	0.977171	0.0176574
PDLIM7_Q9NR12_OID20729_v1_Inflammation	6	Inverse variance weighted	-0.666372	0.299942	0.513569	0.285287	0.924516	0.0263059
PDZD2_O15018_OID30151_v1_Cardiometabolic_II	12	Inverse variance weighted	0.40164	0.127452	1.49427	1.16397	1.91831	0.00162544
PECR_Q9BY49_OID30228_v1_Cardiometabolic_II	19	Inverse variance weighted	0.296853	0.114612	1.34562	1.07488	1.68454	0.00959588
PENK_P01210_OID30666_v1_Inflammation_II	53	Inverse variance weighted	-0.162431	0.061259	0.850075	0.753898	0.958522	0.00801264
PGLYRP1_O75594_OID20338_v1_Cardiometabolic	76	Inverse variance weighted	0.275079	0.0782364	1.31663	1.12946	1.53483	0.000438102
PGLYRP2_Q96PD5_OID30742_v1_Inflammation_II	119	Inverse variance weighted	0.0941932	0.0235517	1.09877	1.0492	1.15068	6.35E-05
PGR_P06401_OID30460_v1_Inflammation_II	16	Inverse variance weighted	-0.368158	0.142627	0.692008	0.523244	0.915204	0.00984403
PI16_Q6UXB8_OID30676_v1_Inflammation_II	76	Inverse variance weighted	-0.111142	0.055674	0.894812	0.802308	0.997981	0.0459018
PILRA_Q9UKJ1_OID21129_v1_Neurology	148	Inverse variance weighted	0.0659262	0.0235854	1.06815	1.01989	1.11868	0.00518662
PILRB_Q9UKJ0_OID20197_v1_Cardiometabolic	170	Inverse variance weighted	0.0444986	0.0202532	1.0455	1.00481	1.08784	0.028012
PKD1_P98161_OID30328_v1_Cardiometabolic_II	61	Inverse variance weighted	-0.161238	0.0676922	0.851089	0.74534	0.971843	0.0172221
PKN3_Q6P5Z2_OID31311_v1_Oncology_II	7	Inverse variance weighted	-0.511181	0.186426	0.599787	0.416205	0.864343	0.00610655
PLAT_P00750_OID20247_v1_Cardiometabolic	8	Inverse variance weighted	0.539341	0.264215	1.71488	1.02171	2.87831	0.0412215
PPCDC_Q96CD2_OID21027_v1_Neurology	35	Inverse variance weighted	0.145644	0.0626235	1.15678	1.02317	1.30785	0.0200338
PPP1R9B_Q96SB3_OID20643_v1_Inflammation	3	Inverse variance weighted	-1.20121	0.411593	0.30083	0.134266	0.674026	0.0035179
PPY_P01298_OID21516_v1_Oncology	37	Inverse variance weighted	-0.235929	0.0947597	0.789837	0.655959	0.95104	0.012783
PRND_Q9UKY0_OID31124_v1_Neurology_II	90	Inverse variance weighted	0.232767	0.0774513	1.26209	1.08433	1.46898	0.00265292
PRSS53_Q2L4Q9_OID31093_v1_Neurology_II	178	Inverse variance weighted	0.0651568	0.0253557	1.06733	1.01558	1.12171	0.0101784
PSAPL1_Q6NUJ1_OID31473_v1_Oncology_II	157	Inverse variance weighted	0.0899941	0.0387281	1.09417	1.01419	1.18046	0.0201395
PSG1_P11464_OID20916_v1_Neurology	155	Inverse variance weighted	0.0677669	0.0228798	1.07012	1.02319	1.1192	0.00305781
PTPRC_P08575_OID30380_v1_Cardiometabolic_II	49	Inverse variance weighted	0.278436	0.0774858	1.32106	1.13492	1.53773	0.000326422
PTPRN2_Q92932_OID20912_v1_Neurology	23	Inverse variance weighted	-0.406875	0.136273	0.665727	0.509681	0.869549	0.00282895
PVALB_P20472_OID21420_v1_Oncology	68	Inverse variance weighted	0.115252	0.0404348	1.12216	1.03666	1.21471	0.0043677
PVR_P15151_OID21011_v1_Neurology	81	Inverse variance weighted	-0.0773995	0.0382099	0.92552	0.858738	0.997495	0.0428016
PXN_P49023_OID20822_v1_Neurology	87	Inverse variance weighted	-0.0764189	0.03779	0.926428	0.860289	0.997652	0.0431557
QDPR_P09417_OID20174_v1_Cardiometabolic	35	Inverse variance weighted	0.136704	0.0677542	1.14649	1.00391	1.30931	0.0436281
RASSF2_P50749_OID21194_v1_Oncology	8	Inverse variance weighted	0.605821	0.224367	1.83276	1.18065	2.84505	0.00693117
REG1B_P48304_OID20266_v1_Cardiometabolic	76	Inverse variance weighted	0.113294	0.0480396	1.11996	1.01932	1.23054	0.0183569
REG4_Q9BYZ8_OID20784_v1_Inflammation	27	Inverse variance weighted	-0.265681	0.102778	0.766683	0.626801	0.937782	0.00973754
RETN_Q9HD89_OID20327_v1_Cardiometabolic	64	Inverse variance weighted	-0.152889	0.0701352	0.858225	0.747999	0.984694	0.0292632
RGMA_Q96B86_OID21065_v1_Neurology	100	Inverse variance weighted	-0.164841	0.0470679	0.848029	0.773296	0.929984	0.000461451
RNF43_Q68DV7_OID31291_v1_Oncology_II	6	Inverse variance weighted	-0.464946	0.220305	0.628169	0.407896	0.967396	0.0348185
RNF5_Q99942_OID30218_v1_Cardiometabolic_II	11	Inverse variance weighted	-0.511531	0.23592	0.599577	0.377595	0.95206	0.0301406
RPL14_P50914_OID30284_v1_Cardiometabolic_II	3	Inverse variance weighted	-1.2403	0.422933	0.289296	0.12628	0.662752	0.00336111
RSPO3_Q9BXY4_OID21415_v1_Oncology	26	Inverse variance weighted	0.246466	0.119025	1.2795	1.01326	1.61568	0.0383868
RTN4R_Q9BZR6_OID21424_v1_Oncology	65	Inverse variance weighted	0.166198	0.0544379	1.18081	1.06131	1.31376	0.00226572
RUVBL1_Q9Y265_OID21211_v1_Oncology	15	Inverse variance weighted	-0.309161	0.119084	0.734062	0.581255	0.927042	0.00942719
S100A11_P31949_OID20130_v1_Cardiometabolic	16	Inverse variance weighted	0.304764	0.114346	1.35631	1.08399	1.69704	0.00769246
S100A16_Q96FQ6_OID20878_v1_Neurology	5	Inverse variance weighted	-0.701734	0.256266	0.495725	0.299987	0.81918	0.00617581
S100P_P25815_OID20103_v1_Cardiometabolic	22	Inverse variance weighted	0.429035	0.106321	1.53577	1.24688	1.8916	5.45E-05
SAMD9L_Q8IVG5_OID20536_v1_Inflammation	16	Inverse variance weighted	-0.286493	0.0994033	0.750892	0.617965	0.912413	0.00394997
SCGN_O76038_OID20457_v1_Inflammation	22	Inverse variance weighted	-0.259314	0.130132	0.771581	0.597875	0.995754	0.0462949
SDCCAG8_Q86SQ7_OID31423_v1_Oncology_II	15	Inverse variance weighted	-0.727966	0.124454	0.48289	0.378365	0.616292	4.94E-09
SEMA3G_Q9NS98_OID30599_v1_Inflammation_II	140	Inverse variance weighted	0.193984	0.0442705	1.21408	1.11317	1.32413	1.18E-05
SEPTIN8_Q92599_OID31079_v1_Neurology_II	9	Inverse variance weighted	-0.444384	0.214877	0.641219	0.420823	0.977043	0.0386321
SERPINB8_P50452_OID20630_v1_Inflammation	55	Inverse variance weighted	-0.0872967	0.0402492	0.916405	0.846889	0.991627	0.0300897
SERPIND1_P05546_OID30767_v1_Inflammation_II	71	Inverse variance weighted	-0.167141	0.0621712	0.84608	0.749015	0.955725	0.00717965
SERPINI1_Q99574_OID30604_v1_Inflammation_II	67	Inverse variance weighted	-0.105945	0.0496451	0.899474	0.816075	0.991397	0.0328394
SFTPA1_Q8IWL2_OID21165_v1_Oncology	14	Inverse variance weighted	0.246998	0.0989433	1.28018	1.0545	1.55415	0.0125473
SFTPD_P35247_OID20214_v1_Cardiometabolic	240	Inverse variance weighted	0.0898452	0.0256353	1.094	1.04039	1.15038	0.000457035
SH3BP1_Q9Y3L3_OID31439_v1_Oncology_II	25	Inverse variance weighted	0.37837	0.0910608	1.4599	1.22127	1.74516	3.25E-05
SIGLEC10_Q96LC7_OID20537_v1_Inflammation	57	Inverse variance weighted	0.107093	0.0520327	1.11304	1.00512	1.23254	0.0395719
SIGLEC5_O15389_OID21082_v1_Neurology	93	Inverse variance weighted	-0.0516336	0.0259965	0.949677	0.9025	0.99932	0.0470143
SIGLEC8_Q9NYZ4_OID30261_v1_Cardiometabolic_II	103	Inverse variance weighted	-0.146466	0.040261	0.863755	0.798215	0.934677	0.000274861
SIRT1_Q96EB6_OID30439_v1_Inflammation_II	7	Inverse variance weighted	-0.716614	0.236988	0.488403	0.306937	0.777154	0.00249591
SLITRK6_Q9H5Y7_OID20094_v1_Cardiometabolic	57	Inverse variance weighted	-0.132877	0.059605	0.875573	0.779032	0.984077	0.0257946
SLMAP_Q14BN4_OID31441_v1_Oncology_II	4	Inverse variance weighted	-1.26651	0.364859	0.281812	0.137843	0.576148	0.00051806
SMPD1_P17405_OID21028_v1_Neurology	108	Inverse variance weighted	0.140279	0.0498953	1.1506	1.0434	1.2688	0.00493147
SNAP23_O00161_OID20218_v1_Cardiometabolic	10	Inverse variance weighted	-0.615828	0.231082	0.540193	0.343438	0.84967	0.00769936
SOD2_P04179_OID21114_v1_Neurology	42	Inverse variance weighted	0.19089	0.0953505	1.21033	1.00401	1.45904	0.0452867
SPAG1_Q07617_OID30979_v1_Neurology_II	84	Inverse variance weighted	0.106696	0.031565	1.1126	1.04585	1.1836	0.000724304
SPART_Q8N0X7_OID30656_v1_Inflammation_II	4	Inverse variance weighted	-0.917848	0.393561	0.399377	0.184662	0.863753	0.0196922
SPINK8_P0C7L1_OID30153_v1_Cardiometabolic_II	64	Inverse variance weighted	-0.212461	0.0625891	0.808592	0.715241	0.914127	0.000687464
STAB2_Q8WWQ8_OID30401_v1_Cardiometabolic_II	120	Inverse variance weighted	-0.0957426	0.0483882	0.908698	0.826477	0.999099	0.047857
STX7_O15400_OID30560_v1_Inflammation_II	73	Inverse variance weighted	0.105009	0.0413461	1.11072	1.02426	1.20448	0.0110931
SUSD4_Q5VX71_OID31398_v1_Oncology_II	36	Inverse variance weighted	-0.230958	0.073964	0.793772	0.686652	0.917604	0.00179273
SV2A_Q7L0J3_OID30965_v1_Neurology_II	7	Inverse variance weighted	0.676437	0.201663	1.96686	1.32469	2.92033	0.0007957
TAX1BP1_Q86VP1_OID31075_v1_Neurology_II	4	Inverse variance weighted	-0.697402	0.305595	0.497877	0.273523	0.906254	0.0224827
TCN2_P20062_OID20341_v1_Cardiometabolic	127	Inverse variance weighted	0.158633	0.0418706	1.17191	1.07957	1.27214	0.000151476
TDGF1_P13385_OID20816_v1_Neurology	167	Inverse variance weighted	0.0737156	0.0241099	1.0765	1.02681	1.12859	0.00223208
TF_P02787_OID30783_v1_Inflammation_II	81	Inverse variance weighted	0.129443	0.0504184	1.13819	1.0311	1.25642	0.010247
TG_P01266_OID31359_v1_Oncology_II	47	Inverse variance weighted	0.646693	0.14764	1.90922	1.42949	2.54994	1.19E-05
TGFBR3_Q03167_OID20255_v1_Cardiometabolic	52	Inverse variance weighted	0.218696	0.0791549	1.24445	1.06562	1.4533	0.00572932
TGOLN2_O43493_OID30691_v1_Inflammation_II	107	Inverse variance weighted	0.0877612	0.0332903	1.09173	1.02277	1.16534	0.00838301
THBS2_P35442_OID21104_v1_Neurology	69	Inverse variance weighted	0.110099	0.0511683	1.11639	1.00986	1.23416	0.0314207
TLR1_Q15399_OID30532_v1_Inflammation_II	44	Inverse variance weighted	0.282782	0.0747942	1.32682	1.14589	1.5363	0.000156327
TMEM132A_Q24JP5_OID30287_v1_Cardiometabolic_II	67	Inverse variance weighted	-0.118433	0.0433797	0.888312	0.815905	0.967143	0.00633065
TMPRSS5_Q9H3S3_OID20947_v1_Neurology	131	Inverse variance weighted	-0.109767	0.0340903	0.896043	0.838128	0.957959	0.00128243
TNFRSF10A_O00220_OID20967_v1_Neurology	69	Inverse variance weighted	0.1434	0.0463649	1.15419	1.05393	1.26399	0.00198241
TNFRSF11A_Q9Y6Q6_OID20646_v1_Inflammation	99	Inverse variance weighted	-0.111982	0.0369743	0.89406	0.83156	0.961258	0.00245651
TNFRSF17_Q02223_OID30589_v1_Inflammation_II	51	Inverse variance weighted	-0.189061	0.0925967	0.827736	0.690354	0.992457	0.0411743
TNFSF11_O14788_OID20592_v1_Inflammation	56	Inverse variance weighted	0.193716	0.06949	1.21375	1.0592	1.39085	0.00530861
TNFSF12_O43508_OID20624_v1_Inflammation	77	Inverse variance weighted	0.122391	0.0578704	1.1302	1.00901	1.26594	0.0344367
TNFSF13B_Q9Y275_OID20272_v1_Cardiometabolic	82	Inverse variance weighted	0.221738	0.0746129	1.24824	1.07842	1.44481	0.00296011
TNXB_P22105_OID21107_v1_Neurology	163	Inverse variance weighted	0.078064	0.035881	1.08119	1.00777	1.15997	0.0295826
TPMT_P51580_OID21270_v1_Oncology	48	Inverse variance weighted	-0.116743	0.0584547	0.889814	0.79349	0.99783	0.0458079
TPP1_O14773_OID20750_v1_Inflammation	51	Inverse variance weighted	0.220935	0.0791356	1.24724	1.06804	1.45651	0.0052407
TREH_O43280_OID30388_v1_Cardiometabolic_II	111	Inverse variance weighted	0.0661377	0.0303598	1.06837	1.00665	1.13388	0.0293716
TRIM40_Q6P9F5_OID30885_v1_Neurology_II	45	Inverse variance weighted	-0.229426	0.0817381	0.794989	0.677305	0.933122	0.00500291
TSC1_Q92574_OID30478_v1_Inflammation_II	7	Inverse variance weighted	-0.535904	0.247104	0.58514	0.360513	0.949728	0.0301026
TSHB_P01222_OID20129_v1_Cardiometabolic	52	Inverse variance weighted	-0.364001	0.159485	0.69489	0.508347	0.949888	0.0224682
TXNDC15_Q96J42_OID21495_v1_Oncology	159	Inverse variance weighted	-0.0766622	0.0374252	0.926203	0.860695	0.996697	0.0405197
TYRO3_Q06418_OID20161_v1_Cardiometabolic	154	Inverse variance weighted	0.091315	0.0317043	1.09561	1.0296	1.16586	0.00397413
UNC79_Q9P2D8_OID31181_v1_Oncology_II	5	Inverse variance weighted	-1.15751	0.294413	0.314268	0.176478	0.55964	8.44E-05
USP28_Q96RU2_OID31084_v1_Neurology_II	3	Inverse variance weighted	-0.998816	0.347447	0.368315	0.186409	0.727733	0.00404369
VMO1_Q7Z5L0_OID21381_v1_Oncology	125	Inverse variance weighted	-0.0628934	0.0268508	0.939044	0.890902	0.989787	0.0191636
VSIG10_Q8N0Z9_OID31400_v1_Oncology_II	78	Inverse variance weighted	0.113123	0.0354828	1.11977	1.04454	1.20042	0.00143204
VWC2L_B2RUY7_OID31002_v1_Neurology_II	5	Inverse variance weighted	0.552828	0.262887	1.73816	1.03828	2.9098	0.0354733
WASL_O00401_OID30467_v1_Inflammation_II	14	Inverse variance weighted	-0.687989	0.190866	0.502586	0.345733	0.730598	0.000312682
XCL1_P47992_OID21398_v1_Oncology	109	Inverse variance weighted	-0.109112	0.0386581	0.89663	0.831202	0.967207	0.00476517
ZFYVE19_Q96K21_OID31452_v1_Oncology_II	49	Inverse variance weighted	-0.254156	0.0867198	0.775571	0.654341	0.919261	0.00338121
ZP3_P21754_OID30265_v1_Cardiometabolic_II	165	Inverse variance weighted	-0.0486998	0.0193218	0.952467	0.917071	0.989229	0.0117203
