# Supplementary material for: Integrated multi-omics reveals the ITGB2-IL2RB-NK axis in promoting papillary thyroid carcinoma progression and immune microenvironment crosstalk
Source: Research Square preprint supplement (doi:10.21203/rs.3.rs-7218110/v1), 2025-08-21
Supplement: Supplementary file 4 [file dd184f2484003ad952ec4ac9.xlsx]

## Sheet: Sheet1
Table S5. Mendelian randomization analysis of causal effects between UKB-PPP pQTL-derived proteins and deCODE pQTL-derived proteins in papillary thyroid carcinoma.
id1	id2	nsnp	method	b	se	or	or_lci95	or_uci95	pvalue
ADAM23_O75077_OID20651_v1_Inflammation	10011_65_OCRL_OCRL	104	MR Egger	-0.000454793	0.0115121172101403	0.999545310770479	0.977244363184688	1.02235517125663	0.968564542355821
ADAM23_O75077_OID20651_v1_Inflammation	10011_65_OCRL_OCRL	104	Weighted median	0.00264689571938484	0.00873192820040888	1.00265040184062	0.985636470486061	1.01995802551361	0.761791985905145
ADAM23_O75077_OID20651_v1_Inflammation	10011_65_OCRL_OCRL	104	Inverse variance weighted	0.0178137244196893	0.00852756981856255	1.01797333515383	1.00110029245339	1.03513076451574	0.0367116178028093
ADAM23_O75077_OID20651_v1_Inflammation	10011_65_OCRL_OCRL	104	Simple mode	0.01259264877286	0.0131627725132178	1.01267227003761	0.98688043633353	1.03913816582797	0.340965544958761
ADAM23_O75077_OID20651_v1_Inflammation	10011_65_OCRL_OCRL	104	Weighted mode	0.00720658265298224	0.0077089882464014	1.00723261256107	0.992128112560084	1.02256706867095	0.352063135885435
ADAM23_O75077_OID20651_v1_Inflammation	10024_44_HOGA1_HOGA1	104	MR Egger	0.0132922967856495	0.00873367917126947	1.01338103209202	0.996181594331927	1.03087742440432	0.131113700759426
ADAM23_O75077_OID20651_v1_Inflammation	10024_44_HOGA1_HOGA1	104	Weighted median	0.00745491205472188	0.00875560184249476	1.00748276909249	0.990340884288424	1.02492136406908	0.394522289377738
ADAM23_O75077_OID20651_v1_Inflammation	10024_44_HOGA1_HOGA1	104	Inverse variance weighted	0.0203247220289272	0.00633036112746403	1.02053267566888	1.00794863823507	1.03327382229668	0.0013242435093169
ADAM23_O75077_OID20651_v1_Inflammation	10024_44_HOGA1_HOGA1	104	Simple mode	0.0152553930402161	0.0137417136568838	1.01537235053595	0.988389561701496	1.0430917627844	0.269518497310583
ADAM23_O75077_OID20651_v1_Inflammation	10024_44_HOGA1_HOGA1	104	Weighted mode	0.0111220452446986	0.00750248963256413	1.0111841251282	0.996423576257732	1.02616332980745	0.141274526702694
ADAM23_O75077_OID20651_v1_Inflammation	11275_94_LRP1B_LRP1B	104	MR Egger	0.0147409299770369	0.00864440212015925	1.01485011331363	0.997800324660949	1.03219123810433	0.0911902241980962
ADAM23_O75077_OID20651_v1_Inflammation	11275_94_LRP1B_LRP1B	104	Weighted median	0.0210136761920813	0.0084628301546544	1.02123601816197	1.00443634064054	1.03831667831356	0.0130260824051296
ADAM23_O75077_OID20651_v1_Inflammation	11275_94_LRP1B_LRP1B	104	Inverse variance weighted	0.0190626848416156	0.00623951878571173	1.01924553786005	1.00685662779251	1.03178688779681	0.00224945699359732
ADAM23_O75077_OID20651_v1_Inflammation	11275_94_LRP1B_LRP1B	104	Simple mode	0.0348989168483167	0.0144823927163995	1.03551503038621	1.00653468562078	1.06532978294178	0.0177377214667505
ADAM23_O75077_OID20651_v1_Inflammation	11275_94_LRP1B_LRP1B	104	Weighted mode	0.0166585210008985	0.0071396187550176	1.01679804785548	1.00266842215864	1.03112678855177	0.0215781440977038
ADAM23_O75077_OID20651_v1_Inflammation	11308_8_CREB3L4_CR3L4	104	MR Egger	0.0233126725145541	0.0100921132669987	1.02358653689378	1.00353837583515	1.04403520955367	0.0229031721598151
ADAM23_O75077_OID20651_v1_Inflammation	11308_8_CREB3L4_CR3L4	104	Weighted median	0.0205684800790304	0.0102129424860042	1.02078146904543	1.00055126469703	1.04142070907489	0.0440135026624434
ADAM23_O75077_OID20651_v1_Inflammation	11308_8_CREB3L4_CR3L4	104	Inverse variance weighted	0.0332144831596241	0.0073392420421324	1.03377224220152	1.01900796302338	1.04875043917771	6.02240315652733e-06
ADAM23_O75077_OID20651_v1_Inflammation	11308_8_CREB3L4_CR3L4	104	Simple mode	0.0326224360722833	0.0158842195691632	1.0331603814996	1.00149047537267	1.06583177788405	0.0425317236091059
ADAM23_O75077_OID20651_v1_Inflammation	11308_8_CREB3L4_CR3L4	104	Weighted mode	0.0289765331312271	0.00813886367334195	1.02940043738671	1.01310954674359	1.04595328698461	0.000562291230579117
ADAM23_O75077_OID20651_v1_Inflammation	11358_15_GRB10_GRB10	104	MR Egger	0.0255753958187596	0.00955593372321813	1.02590525232109	1.00686925153762	1.04530115020667	0.00867243779215603
ADAM23_O75077_OID20651_v1_Inflammation	11358_15_GRB10_GRB10	104	Weighted median	0.0228000341015213	0.00937789546416908	1.02306194159124	1.00442913876016	1.04204039483005	0.0150467142262725
ADAM23_O75077_OID20651_v1_Inflammation	11358_15_GRB10_GRB10	104	Inverse variance weighted	0.026984852712449	0.00688446780027263	1.02735224104582	1.01358271400939	1.04130882718674	8.86697196660518e-05
ADAM23_O75077_OID20651_v1_Inflammation	11358_15_GRB10_GRB10	104	Simple mode	0.0177686440060124	0.0178009250995015	1.01792744552914	0.983024565128914	1.05406957376044	0.320528179638019
ADAM23_O75077_OID20651_v1_Inflammation	11358_15_GRB10_GRB10	104	Weighted mode	0.0177686440060124	0.00783766522425966	1.01792744552914	1.00240971888322	1.0336853931503	0.0254742051672197
ADAM23_O75077_OID20651_v1_Inflammation	11441_11_PYGL_PYGL	104	MR Egger	0.0144242560237442	0.00800700071180283	1.01452878759667	0.998731340058917	1.03057611149126	0.0745855528573752
ADAM23_O75077_OID20651_v1_Inflammation	11441_11_PYGL_PYGL	104	Weighted median	0.0135065011566067	0.00828208721905855	1.01359812598894	0.99727732343257	1.0301860243569	0.102930658874304
ADAM23_O75077_OID20651_v1_Inflammation	11441_11_PYGL_PYGL	104	Inverse variance weighted	0.0145735448563644	0.00578629043605624	1.01468025672108	1.00323764549054	1.02625337875567	0.0117811217788338
ADAM23_O75077_OID20651_v1_Inflammation	11441_11_PYGL_PYGL	104	Simple mode	0.0151042795570044	0.0133974737518493	1.01521892567588	0.988907214753514	1.04223070847692	0.262193915623505
ADAM23_O75077_OID20651_v1_Inflammation	11441_11_PYGL_PYGL	104	Weighted mode	0.0151042795570044	0.00709468318189323	1.01521892567588	1.00119941924911	1.02943474320379	0.0356416913371224
ADAM23_O75077_OID20651_v1_Inflammation	11465_4_GPR135_GP135	104	MR Egger	0.0162981257937481	0.00938400403568742	1.01643166473771	0.997907669864597	1.03529951746103	0.0854416534340763
ADAM23_O75077_OID20651_v1_Inflammation	11465_4_GPR135_GP135	104	Weighted median	0.011842022669325	0.00864733516645257	1.01191241701583	0.994906263044452	1.02920926095835	0.170861199979656
ADAM23_O75077_OID20651_v1_Inflammation	11465_4_GPR135_GP135	104	Inverse variance weighted	0.0234761555357701	0.00681471740087859	1.02375388959259	1.01017068278311	1.03751974227606	0.000571228655640513
ADAM23_O75077_OID20651_v1_Inflammation	11465_4_GPR135_GP135	104	Simple mode	0.0258586743328997	0.0138830737481284	1.02619591040327	0.998648763529782	1.05450292934448	0.0653678035308456
ADAM23_O75077_OID20651_v1_Inflammation	11465_4_GPR135_GP135	104	Weighted mode	0.0143658645930967	0.00727997938376922	1.01446954953885	1.00009710971575	1.0290485363307	0.0511361866315968
ADAM23_O75077_OID20651_v1_Inflammation	12716_3_ZNF175_ZN175	104	MR Egger	0.00902718655429541	0.00960837744720207	1.00906805448442	0.990242681324866	1.02825131433304	0.349687454250338
ADAM23_O75077_OID20651_v1_Inflammation	12716_3_ZNF175_ZN175	104	Weighted median	0.0122853357267604	0.00868742291345615	1.01236111045175	0.995269212409923	1.02974653006044	0.157317303672057
ADAM23_O75077_OID20651_v1_Inflammation	12716_3_ZNF175_ZN175	104	Inverse variance weighted	0.0227841690934849	0.00705662222233022	1.02304571083407	1.0089933892214	1.03729374011422	0.00124326366812963
ADAM23_O75077_OID20651_v1_Inflammation	12716_3_ZNF175_ZN175	104	Simple mode	0.0305118037886314	0.0144831538064487	1.03098205947127	1.00212708136269	1.06066788007192	0.0375718845130249
ADAM23_O75077_OID20651_v1_Inflammation	12716_3_ZNF175_ZN175	104	Weighted mode	0.0147106855603285	0.0070277281156347	1.01481942022806	1.00093677695539	1.02889461091098	0.0387843286580823
ADAM23_O75077_OID20651_v1_Inflammation	12781_2_TARBP2_TRBP2	104	MR Egger	0.0185730216896721	0.00865473874012797	1.01874657304969	1.00161103007589	1.03617527057569	0.0342453872313825
ADAM23_O75077_OID20651_v1_Inflammation	12781_2_TARBP2_TRBP2	104	Weighted median	0.0154530625215931	0.00852090450873581	1.01557307850013	0.998752868000759	1.03267656175927	0.0697474654628446
ADAM23_O75077_OID20651_v1_Inflammation	12781_2_TARBP2_TRBP2	104	Inverse variance weighted	0.0193935184322122	0.00623972842997679	1.01958279430585	1.00718937103566	1.03212871813329	0.00188312878037952
ADAM23_O75077_OID20651_v1_Inflammation	12781_2_TARBP2_TRBP2	104	Simple mode	0.0149220004934522	0.0138548878367904	1.01503388938544	0.987840946352838	1.04297539032457	0.283987126791681
ADAM23_O75077_OID20651_v1_Inflammation	12781_2_TARBP2_TRBP2	104	Weighted mode	0.0117420916123827	0.00699996556987136	1.01181130059088	0.99802411373389	1.02578895030225	0.0964867333067944
ADAM23_O75077_OID20651_v1_Inflammation	13056_18_SLC6A16_S6A16	104	MR Egger	0.00133199373033859	0.00819905893127932	1.00133288122799	0.985369913337004	1.01755444879859	0.871267467141498
ADAM23_O75077_OID20651_v1_Inflammation	13056_18_SLC6A16_S6A16	104	Weighted median	0.0191485422128242	0.00897162035028175	1.01933305135933	1.00156539027249	1.03741590882134	0.0328144665416914
ADAM23_O75077_OID20651_v1_Inflammation	13056_18_SLC6A16_S6A16	104	Inverse variance weighted	0.017360776989802	0.00613513032195873	1.01751235115662	1.0053501829428	1.02982165052749	0.00465869531143937
ADAM23_O75077_OID20651_v1_Inflammation	13056_18_SLC6A16_S6A16	104	Simple mode	0.0221565613405516	0.0148762144519951	1.0224038408567	0.993023629661088	1.05265331314955	0.139439060594549
ADAM23_O75077_OID20651_v1_Inflammation	13056_18_SLC6A16_S6A16	104	Weighted mode	0.0126095950354073	0.00804952282858072	1.01268943119318	0.996837541431292	1.02879340055539	0.120298327435209
ADAM23_O75077_OID20651_v1_Inflammation	13111_79_BCL6_BCL6	104	MR Egger	0.0108051091345547	0.0102301864179382	1.01086369514554	0.990796557097185	1.03133726378407	0.293372673224308
ADAM23_O75077_OID20651_v1_Inflammation	13111_79_BCL6_BCL6	104	Weighted median	0.0104592084504812	0.00845857629722247	1.01051409716846	0.993899085529035	1.02740686196793	0.216264910762143
ADAM23_O75077_OID20651_v1_Inflammation	13111_79_BCL6_BCL6	104	Inverse variance weighted	0.0187431075173591	0.00741482564504418	1.01891986214036	1.00421892396038	1.03383600995065	0.0114783628751573
ADAM23_O75077_OID20651_v1_Inflammation	13111_79_BCL6_BCL6	104	Simple mode	1.15236564529608e-05	0.0145929294863812	1.00001152372285	0.971814226161375	1.02902696900059	0.999371458817629
ADAM23_O75077_OID20651_v1_Inflammation	13111_79_BCL6_BCL6	104	Weighted mode	0.00810524093844156	0.00717421741112786	1.00813817732943	0.994061477956463	1.0224142139362	0.261195828854978
ADAM23_O75077_OID20651_v1_Inflammation	13378_80_C5orf63_YD286	104	MR Egger	0.00987694423789736	0.0102306946232069	1.00992588223824	0.989876375162994	1.03038148318949	0.336616563022316
ADAM23_O75077_OID20651_v1_Inflammation	13378_80_C5orf63_YD286	104	Weighted median	0.0121286810012134	0.00910430650958831	1.01220253172122	0.994300544119419	1.03042683752147	0.182797223654716
ADAM23_O75077_OID20651_v1_Inflammation	13378_80_C5orf63_YD286	104	Inverse variance weighted	0.0251951870916861	0.00756048631453025	1.02551526833336	1.01043065788152	1.04082507530979	0.000860749344518717
ADAM23_O75077_OID20651_v1_Inflammation	13378_80_C5orf63_YD286	104	Simple mode	0.0322571276332788	0.0149662564967773	1.03278302822275	1.00292754180493	1.06352726286225	0.0334658326406974
ADAM23_O75077_OID20651_v1_Inflammation	13378_80_C5orf63_YD286	104	Weighted mode	0.0168436701844287	0.00735131203092365	1.01698632461296	1.00243806586446	1.03175	0.0239851032257078
ADAM23_O75077_OID20651_v1_Inflammation	13430_50_SLC14A1_UT1	104	MR Egger	0.0120684088331239	0.00922238912965163	1.01214152591858	0.994010534929609	1.03060323053954	0.193611122121714
ADAM23_O75077_OID20651_v1_Inflammation	13430_50_SLC14A1_UT1	104	Weighted median	0.010816437446349	0.00883292496957766	1.01087514658952	0.993524958520013	1.02852832556375	0.220741437422279
ADAM23_O75077_OID20651_v1_Inflammation	13430_50_SLC14A1_UT1	104	Inverse variance weighted	0.0260296319163377	0.00678772761431385	1.02637136137316	1.01280700190003	1.04011738610686	0.00012566243492281
ADAM23_O75077_OID20651_v1_Inflammation	13430_50_SLC14A1_UT1	104	Simple mode	0.0174453785922229	0.0143375909654618	1.0175984379735	0.989400277515308	1.04660025320246	0.226477060178623
ADAM23_O75077_OID20651_v1_Inflammation	13430_50_SLC14A1_UT1	104	Weighted mode	0.0139030350675661	0.00739743274044663	1.01400013171716	0.999404244429155	1.02880918592628	0.0630108914039394
ADAM23_O75077_OID20651_v1_Inflammation	13565_2_RBL2_p130	104	MR Egger	0.0224924988218531	0.00798194493984709	1.02274736232551	1.00687138712819	1.03887366402101	0.00580584731815762
ADAM23_O75077_OID20651_v1_Inflammation	13565_2_RBL2_p130	104	Weighted median	0.0337234245712922	0.00949367754731185	1.03429850561307	1.01523063834608	1.05372450190846	0.000382026940249506
ADAM23_O75077_OID20651_v1_Inflammation	13565_2_RBL2_p130	104	Inverse variance weighted	0.0259178774158279	0.00578100076470123	1.0262566661633	1.01469402710182	1.03795106378302	7.35024530144256e-06
ADAM23_O75077_OID20651_v1_Inflammation	13565_2_RBL2_p130	104	Simple mode	0.015547177713122	0.0159834377550942	1.01566866385287	0.984343497237231	1.04799070408657	0.332978510681132
ADAM23_O75077_OID20651_v1_Inflammation	13565_2_RBL2_p130	104	Weighted mode	0.031175161592581	0.00791951224280858	1.03166619635484	1.01577606621738	1.04780490119708	0.000150462127294228
ADAM23_O75077_OID20651_v1_Inflammation	13645_14_DHX38_PRP16	104	MR Egger	0.00825630361515322	0.0105278133140553	1.0082904808844	0.98769808444429	1.02931220567679	0.43471837876731
ADAM23_O75077_OID20651_v1_Inflammation	13645_14_DHX38_PRP16	104	Weighted median	0.00185775475256688	0.0091306534646391	1.00185948144802	0.984089603076872	1.01995023362613	0.838772768212773
ADAM23_O75077_OID20651_v1_Inflammation	13645_14_DHX38_PRP16	104	Inverse variance weighted	0.0150844329596692	0.00765642629135885	1.0151987772346	1.00007784045802	1.03054833894391	0.048819315908468
ADAM23_O75077_OID20651_v1_Inflammation	13645_14_DHX38_PRP16	104	Simple mode	0.0103673342439542	0.0149103175487065	1.01042126125227	0.981319790683283	1.04038574874737	0.488425041360952
ADAM23_O75077_OID20651_v1_Inflammation	13645_14_DHX38_PRP16	104	Weighted mode	0.00634660760160888	0.00813894632134321	1.00636678998961	0.990440260443176	1.02254942215376	0.437307092612333
ADAM23_O75077_OID20651_v1_Inflammation	13672_3_HSPA6_HSP76	104	MR Egger	0.0056513927481045	0.0101583450445417	1.00566739199324	0.985842214014845	1.0258912521099	0.579203697251167
ADAM23_O75077_OID20651_v1_Inflammation	13672_3_HSPA6_HSP76	104	Weighted median	0.00921387786966889	0.00832736245556054	1.00925645631276	0.992917447788623	1.02586433230432	0.268528278103661
ADAM23_O75077_OID20651_v1_Inflammation	13672_3_HSPA6_HSP76	104	Inverse variance weighted	0.0194247299706678	0.00742852529201006	1.01961461755006	1.0048766728493	1.03456871515781	0.0089257832744563
ADAM23_O75077_OID20651_v1_Inflammation	13672_3_HSPA6_HSP76	104	Simple mode	0.0222074138510122	0.0129724678931234	1.02245583398069	0.996786550995433	1.04878615326135	0.0899267233011395
ADAM23_O75077_OID20651_v1_Inflammation	13672_3_HSPA6_HSP76	104	Weighted mode	0.0130755917508064	0.00678190472084058	1.01316145111316	0.999783082028065	1.0267188397902	0.056607451365277
ADAM23_O75077_OID20651_v1_Inflammation	13942_140_SPSB1_SPSB1	104	MR Egger	0.0217931471925469	0.00899418941325337	1.02203235234214	1.00417321967276	1.04020910812021	0.0171543051928128
ADAM23_O75077_OID20651_v1_Inflammation	13942_140_SPSB1_SPSB1	104	Weighted median	0.0263860319469086	0.00872895360815164	1.02673722535082	1.00932045025243	1.04445454330927	0.00250433390657367
ADAM23_O75077_OID20651_v1_Inflammation	13942_140_SPSB1_SPSB1	104	Inverse variance weighted	0.0280035098261312	0.00653263501528486	1.02839929391781	1.01531564576271	1.04165154170964	1.81339026442331e-05
ADAM23_O75077_OID20651_v1_Inflammation	13942_140_SPSB1_SPSB1	104	Simple mode	0.0436857670010783	0.0157411514823425	1.04465403853586	1.01291580783079	1.07738674013427	0.00655169740370735
ADAM23_O75077_OID20651_v1_Inflammation	13942_140_SPSB1_SPSB1	104	Weighted mode	0.0233759128688876	0.00723768364573126	1.02365127091594	1.0092324111182	1.03827613233984	0.00166314525490978
ADAM23_O75077_OID20651_v1_Inflammation	14135_3_RXFP1_RXFP1	104	MR Egger	0.0123419992822147	0.00904296876023574	1.01241847605693	0.994632238704775	1.03052277090495	0.175313665208915
ADAM23_O75077_OID20651_v1_Inflammation	14135_3_RXFP1_RXFP1	104	Weighted median	0.00732911867968732	0.00899981659364	1.00735604240553	0.989742449376543	1.02528308936346	0.415436962281202
ADAM23_O75077_OID20651_v1_Inflammation	14135_3_RXFP1_RXFP1	104	Inverse variance weighted	0.0227033739282383	0.00662137203921857	1.02296305702587	1.00977293094574	1.03632547869907	0.000606251553601671
ADAM23_O75077_OID20651_v1_Inflammation	14135_3_RXFP1_RXFP1	104	Simple mode	0.0233334503073235	0.014471327953963	1.02360780498367	0.994982278552211	1.05305688453879	0.109936703277168
ADAM23_O75077_OID20651_v1_Inflammation	14135_3_RXFP1_RXFP1	104	Weighted mode	0.012689012784901	0.00725453194266941	1.01276985990243	0.998471299831557	1.02727318181287	0.0832499219426172
ADAM23_O75077_OID20651_v1_Inflammation	14254_27_PTPN4_PTN4	104	MR Egger	0.00794484753317938	0.00866942476844209	1.00797649158121	0.990993577983238	1.02525044576782	0.361607487237836
ADAM23_O75077_OID20651_v1_Inflammation	14254_27_PTPN4_PTN4	104	Weighted median	0.0112873559572937	0.00915115331753285	1.01135129851388	0.993373150513024	1.02965481649819	0.217413384613262
ADAM23_O75077_OID20651_v1_Inflammation	14254_27_PTPN4_PTN4	104	Inverse variance weighted	0.0128715264722379	0.0062777915449356	1.01295472113333	1.00056721585027	1.02549558971343	0.0403325164991544
ADAM23_O75077_OID20651_v1_Inflammation	14254_27_PTPN4_PTN4	104	Simple mode	0.00941035758737085	0.0150667298280952	1.00945477421847	0.980080632269929	1.03970929293071	0.533628739848627
ADAM23_O75077_OID20651_v1_Inflammation	14254_27_PTPN4_PTN4	104	Weighted mode	0.00941035758737085	0.00775987579635274	1.00945477421847	0.994217782766299	1.02492528182025	0.228020797007555
ADAM23_O75077_OID20651_v1_Inflammation	15447_45_SORD_Sorbitol_dehydrogenase	104	MR Egger	0.0188310833257262	0.00868505335661323	1.0190095063821	1.00181001484969	1.03650428594775	0.0324671917735081
ADAM23_O75077_OID20651_v1_Inflammation	15447_45_SORD_Sorbitol_dehydrogenase	104	Weighted median	0.0242307362557308	0.00891713689823901	1.02452668607166	1.00677600185504	1.04259033641936	0.00658124560531281
ADAM23_O75077_OID20651_v1_Inflammation	15447_45_SORD_Sorbitol_dehydrogenase	104	Inverse variance weighted	0.0208307426117455	0.00625275165597192	1.02104921688743	1.00861222300048	1.03363956883749	0.000863941679886509
ADAM23_O75077_OID20651_v1_Inflammation	15447_45_SORD_Sorbitol_dehydrogenase	104	Simple mode	0.0231259108740646	0.0129573254664699	1.02339538804316	0.997732128475106	1.04971874752466	0.0772417129750315
ADAM23_O75077_OID20651_v1_Inflammation	15447_45_SORD_Sorbitol_dehydrogenase	104	Weighted mode	0.0192191247645409	0.00766746381279174	1.01940500102631	1.00419968977556	1.03484054685351	0.0137544542811414
ADAM23_O75077_OID20651_v1_Inflammation	15585_304_FBLN5_fibulin_5	104	MR Egger	0.00938267273619622	0.0093074869807631	1.00942682800012	0.991179132407863	1.02801046528398	0.315802469964834
ADAM23_O75077_OID20651_v1_Inflammation	15585_304_FBLN5_fibulin_5	104	Weighted median	0.0245705420993346	0.00858166874307281	1.02487488538324	1.00778058401155	1.04225914584327	0.00419461621397072
ADAM23_O75077_OID20651_v1_Inflammation	15585_304_FBLN5_fibulin_5	104	Inverse variance weighted	0.0236978364811152	0.00686613637586602	1.02398086147938	1.01029281955353	1.03785435705603	0.000557670306488537
ADAM23_O75077_OID20651_v1_Inflammation	15585_304_FBLN5_fibulin_5	104	Simple mode	0.0253081639725942	0.0150436632553107	1.02563113439467	0.995831297257236	1.05632271925672	0.0955372982600423
ADAM23_O75077_OID20651_v1_Inflammation	15585_304_FBLN5_fibulin_5	104	Weighted mode	0.0188030713231749	0.00814942915055959	1.01898	1.0028341989573	1.03538770674042	0.0230393957949649
ADAM23_O75077_OID20651_v1_Inflammation	15666_21_BMP2_BMP_2	104	MR Egger	0.0134214052346772	0.00802492145792547	1.01351187659173	0.997695219272321	1.02957927847113	0.0974973119711109
ADAM23_O75077_OID20651_v1_Inflammation	15666_21_BMP2_BMP_2	104	Weighted median	0.00547134298440629	0.0092632951505794	1.0054863381168	0.987395396403029	1.02390873992576	0.554756568992412
ADAM23_O75077_OID20651_v1_Inflammation	15666_21_BMP2_BMP_2	104	Inverse variance weighted	0.0196864578225663	0.00582312317758113	1.01988151401927	1.00830745335844	1.03158842987198	0.000722912565285627
ADAM23_O75077_OID20651_v1_Inflammation	15666_21_BMP2_BMP_2	104	Simple mode	0.0176757944511577	0.0154427078498861	1.01783293580661	0.987487033491468	1.04911138078417	0.255025846088119
ADAM23_O75077_OID20651_v1_Inflammation	15666_21_BMP2_BMP_2	104	Weighted mode	0.00942464325534553	0.00709659275950046	1.00946919505721	0.995525362601529	1.02360833189273	0.187096406102656
ADAM23_O75077_OID20651_v1_Inflammation	16773_29_SCUBE3_SCUB3	104	MR Egger	0.0204020011455137	0.0085270749648034	1.02061154457993	1.00369574670669	1.03781243304823	0.0185588016494605
ADAM23_O75077_OID20651_v1_Inflammation	16773_29_SCUBE3_SCUB3	104	Weighted median	0.00971177381204952	0.00908836492612504	1.00975908612546	0.991931306630602	1.02790728067285	0.285252574851326
ADAM23_O75077_OID20651_v1_Inflammation	16773_29_SCUBE3_SCUB3	104	Inverse variance weighted	0.0204517074538019	0.00614725138154884	1.02066227667285	1.00843849984795	1.03303422388185	0.000877965155080806
ADAM23_O75077_OID20651_v1_Inflammation	16773_29_SCUBE3_SCUB3	104	Simple mode	0.0175762865766174	0.0149789785737626	1.01773165845356	0.988286630538059	1.04805397200883	0.243342984815692
ADAM23_O75077_OID20651_v1_Inflammation	16773_29_SCUBE3_SCUB3	104	Weighted mode	0.0145892884083132	0.00738886541416595	1.01469623151816	1.00010711793326	1.02949816454147	0.0510025318861427
ADAM23_O75077_OID20651_v1_Inflammation	16845_15_MPZL1_MPZL1	104	MR Egger	0.0248714459183786	0.00773521607621733	1.02518332055263	1.00975772153487	1.04084456927129	0.00174540604078591
ADAM23_O75077_OID20651_v1_Inflammation	16845_15_MPZL1_MPZL1	104	Weighted median	0.0230218779723842	0.00892919258217427	1.0232889267892	1.00553592743914	1.0413553599782	0.00992961006969839
ADAM23_O75077_OID20651_v1_Inflammation	16845_15_MPZL1_MPZL1	104	Inverse variance weighted	0.0203699356366502	0.00561648663338654	1.02057881867609	1.00940557887957	1.03187573649674	0.000286943137815798
ADAM23_O75077_OID20651_v1_Inflammation	16845_15_MPZL1_MPZL1	104	Simple mode	0.00341339098051063	0.0152624727571694	1.00341922323354	0.973847015819157	1.03388943150139	0.823475749531547
ADAM23_O75077_OID20651_v1_Inflammation	16845_15_MPZL1_MPZL1	104	Weighted mode	0.0206830682230902	0.00733020873589689	1.02089844520137	1.00633584619522	1.03567177831842	0.00573439760700657
ADAM23_O75077_OID20651_v1_Inflammation	17224_12_OGN_MIME	104	MR Egger	0.00600288954462647	0.00762005583420832	1.00602094299227	0.991107355653404	1.02115894102293	0.432655188508789
ADAM23_O75077_OID20651_v1_Inflammation	17224_12_OGN_MIME	104	Weighted median	0.0162084794014162	0.00844419727125657	1.01634054939006	0.999657911275449	1.03330159315857	0.054923440988733
ADAM23_O75077_OID20651_v1_Inflammation	17224_12_OGN_MIME	104	Inverse variance weighted	0.0152346047356992	0.00556462828169323	1.01535124288573	1.00433731233264	1.02648595623235	0.00618596062693267
ADAM23_O75077_OID20651_v1_Inflammation	17224_12_OGN_MIME	104	Simple mode	0.0176429387411025	0.0142146140216152	1.01779949473215	0.989834318666453	1.04655475360023	0.217357457282065
ADAM23_O75077_OID20651_v1_Inflammation	17224_12_OGN_MIME	104	Weighted mode	0.0102974666802527	0.00725600123045938	1.01035066804656	0.996083394254498	1.02482229731992	0.158869946536285
ADAM23_O75077_OID20651_v1_Inflammation	17712_7_IDI1_IDI1	104	MR Egger	0.0222234229965293	0.00961832575265626	1.02247220275595	1.00337719443542	1.04193060317347	0.0228720856960837
ADAM23_O75077_OID20651_v1_Inflammation	17712_7_IDI1_IDI1	104	Weighted median	0.0259620747925644	0.00926300238661305	1.02630202501817	1.00783714098705	1.04510520968182	0.00506656246367664
ADAM23_O75077_OID20651_v1_Inflammation	17712_7_IDI1_IDI1	104	Inverse variance weighted	0.0272252177457709	0.00695957811147238	1.02759921028167	1.01368	1.04171249717901	9.15704261399834e-05
ADAM23_O75077_OID20651_v1_Inflammation	17712_7_IDI1_IDI1	104	Simple mode	0.0218530436504464	0.0153321738853975	1.02209357029325	0.991835494937659	1.05327473332709	0.157092044727583
ADAM23_O75077_OID20651_v1_Inflammation	17712_7_IDI1_IDI1	104	Weighted mode	0.0177364190237757	0.00763424049748053	1.01789464336382	1.00277715682386	1.03324003537382	0.0221297640494487
ADAM23_O75077_OID20651_v1_Inflammation	19277_4_TSTD1_KAT	104	MR Egger	0.0181355201616393	0.00827516069578054	1.0183	1.00191804229232	1.03495177882568	0.0306862806627947
ADAM23_O75077_OID20651_v1_Inflammation	19277_4_TSTD1_KAT	104	Weighted median	0.0170164649080538	0.0087197443766585	1.01716206966732	0.999925768685084	1.03469548277613	0.0509991805022188
ADAM23_O75077_OID20651_v1_Inflammation	19277_4_TSTD1_KAT	104	Inverse variance weighted	0.0211476798665782	0.00598080936176671	1.0213728767105	1.00946985147705	1.03341625483265	0.000406353505314834
ADAM23_O75077_OID20651_v1_Inflammation	19277_4_TSTD1_KAT	104	Simple mode	0.018934958987681	0.0141173753929813	1.01911536216694	0.991302943333394	1.04770809810392	0.182788670311441
ADAM23_O75077_OID20651_v1_Inflammation	19277_4_TSTD1_KAT	104	Weighted mode	0.018934958987681	0.00708774042609422	1.01911536216694	1.00505572501756	1.03337167835793	0.00877859439376916
ADAM23_O75077_OID20651_v1_Inflammation	19553_14_STX1A_STX1a	104	MR Egger	0.0169730940775594	0.00917145668277341	1.01711795546025	0.998997541776619	1.0355670480228	0.0671148514465948
ADAM23_O75077_OID20651_v1_Inflammation	19553_14_STX1A_STX1a	104	Weighted median	0.01773246542065	0.00896381516913456	1.01789061902033	1.00016340103764	1.03593203991934	0.0479030508910785
ADAM23_O75077_OID20651_v1_Inflammation	19553_14_STX1A_STX1a	104	Inverse variance weighted	0.0188155241636115	0.00661278821508174	1.01899365157134	1.00587163010098	1.03228685536985	0.00443662876794707
ADAM23_O75077_OID20651_v1_Inflammation	19553_14_STX1A_STX1a	104	Simple mode	0.0256131642844247	0.0157688596427209	1.0259439999201	0.994720186853993	1.05814791424009	0.107370855841595
ADAM23_O75077_OID20651_v1_Inflammation	19553_14_STX1A_STX1a	104	Weighted mode	0.0158773616826731	0.00751171065610645	1.01600407673498	1.00115507538302	1.03107331653609	0.036957572249936
ADAM23_O75077_OID20651_v1_Inflammation	2833_20_KLK4_Kallikrein_4	104	MR Egger	0.0122054754722686	0.00880791542758165	1.01228	0.994954731572259	1.02990749724686	0.16884891361196
ADAM23_O75077_OID20651_v1_Inflammation	2833_20_KLK4_Kallikrein_4	104	Weighted median	0.014543630502745	0.00834567190126723	1.01464990367107	0.998187757674021	1.03138354393234	0.0813938204169086
ADAM23_O75077_OID20651_v1_Inflammation	2833_20_KLK4_Kallikrein_4	104	Inverse variance weighted	0.016697876268761	0.0063975923702168	1.01683806500245	1.00416725417912	1.02966875899888	0.00905355959848234
ADAM23_O75077_OID20651_v1_Inflammation	2833_20_KLK4_Kallikrein_4	104	Simple mode	0.020414565686419	0.0148921397866214	1.02062436817599	0.991264351161401	1.05085399237264	0.173408274804146
ADAM23_O75077_OID20651_v1_Inflammation	2833_20_KLK4_Kallikrein_4	104	Weighted mode	0.013142702407581	0.00659292656250033	1.01322944732517	1.00022059067163	1.02640749700775	0.0488558528384404
ADAM23_O75077_OID20651_v1_Inflammation	2997_8_JAM2_JAM_B	104	MR Egger	0.0183067452538274	0.0116509785245172	1.01847534095615	0.995481068580965	1.04200075006387	0.119218678890069
ADAM23_O75077_OID20651_v1_Inflammation	2997_8_JAM2_JAM_B	104	Weighted median	0.0279616435802964	0.00935660733764208	1.02835623960142	1.00966914017283	1.04738920251256	0.00280407124797543
ADAM23_O75077_OID20651_v1_Inflammation	2997_8_JAM2_JAM_B	104	Inverse variance weighted	0.0362154484148146	0.00861384896324381	1.03687921641124	1.01952038348983	1.05453360897547	2.61858703526008e-05
ADAM23_O75077_OID20651_v1_Inflammation	2997_8_JAM2_JAM_B	104	Simple mode	0.032212168377493	0.0166770707849959	1.0327365961102	0.999525222381481	1.06705148911012	0.0561664642393909
ADAM23_O75077_OID20651_v1_Inflammation	2997_8_JAM2_JAM_B	104	Weighted mode	0.0241001717713752	0.00802662226666025	1.0243929280054	1.00840310163856	1.04063629836355	0.00336033021829225
ADAM23_O75077_OID20651_v1_Inflammation	3327_27_NTN4_NET4	104	MR Egger	0.0245104103220793	0.0110860210524312	1.02481325968777	1.00278568188045	1.0473247037816	0.0292738741449175
ADAM23_O75077_OID20651_v1_Inflammation	3327_27_NTN4_NET4	104	Weighted median	0.023844747363351	0.00935428705104411	1.02413130646187	1.00552555461728	1.04308133001602	0.0108010125551096
ADAM23_O75077_OID20651_v1_Inflammation	3327_27_NTN4_NET4	104	Inverse variance weighted	0.0211990399043225	0.00801569279648443	1.02142533580714	1.00550337023315	1.03759942285107	0.00817652656545697
ADAM23_O75077_OID20651_v1_Inflammation	3327_27_NTN4_NET4	104	Simple mode	0.026885850627365	0.0156148286735664	1.02725053606643	0.996287694135574	1.05917564781761	0.0881048614199027
ADAM23_O75077_OID20651_v1_Inflammation	3327_27_NTN4_NET4	104	Weighted mode	0.026885850627365	0.00745235465382281	1.02725053606643	1.0123549348442	1.04236530837987	0.000478486027380761
ADAM23_O75077_OID20651_v1_Inflammation	3432_21_EPHA3_EPHA3	104	MR Egger	0.0243179223106372	0.00862930762582545	1.0246160144056	1.00743196030683	1.04209318181316	0.00580350645694162
ADAM23_O75077_OID20651_v1_Inflammation	3432_21_EPHA3_EPHA3	104	Weighted median	0.0188020904701365	0.00822600987704231	1.01897996281491	1.0026827031364	1.03554211254508	0.0222725291269101
ADAM23_O75077_OID20651_v1_Inflammation	3432_21_EPHA3_EPHA3	104	Inverse variance weighted	0.0228296726180476	0.00622259877267486	1.02309226407886	1.01069011431597	1.03564660027017	0.000243660646894381
ADAM23_O75077_OID20651_v1_Inflammation	3432_21_EPHA3_EPHA3	104	Simple mode	0.0207000032597137	0.0121333355473827	1.02091573430033	0.996923408025463	1.04548546874461	0.0910135853161235
ADAM23_O75077_OID20651_v1_Inflammation	3432_21_EPHA3_EPHA3	104	Weighted mode	0.0207000032597137	0.00667824170646289	1.02091573430033	1.00763968411873	1.03436670167823	0.00249883555848199
ADAM23_O75077_OID20651_v1_Inflammation	4931_59_F3_TF	104	MR Egger	0.0175842673957437	0.0101466905042433	1.01773978081826	0.997699404443219	1.03818269996666	0.086116909046556
ADAM23_O75077_OID20651_v1_Inflammation	4931_59_F3_TF	104	Weighted median	0.0118845184291542	0.00877466427739115	1.01195541991658	0.994700269831546	1.02950989655605	0.175604686539364
ADAM23_O75077_OID20651_v1_Inflammation	4931_59_F3_TF	104	Inverse variance weighted	0.0261590607516502	0.00730930388950514	1.02650421202022	1.01190310995258	1.04131599847009	0.000345080829559619
ADAM23_O75077_OID20651_v1_Inflammation	4931_59_F3_TF	104	Simple mode	0.00933628700553546	0.0145331512839695	1.0093800060851	0.981033482008886	1.03854559030751	0.522032344784685
ADAM23_O75077_OID20651_v1_Inflammation	4931_59_F3_TF	104	Weighted mode	0.0166233280448074	0.00740747771908358	1.01676226435609	1.00210688809156	1.03163196910794	0.0269634732572323
ADAM23_O75077_OID20651_v1_Inflammation	5005_4_MAPK12_MK12	104	MR Egger	0.0269980766501632	0.0081422962412648	1.02736582677769	1.01110033255294	1.04389298277217	0.00126654158021815
ADAM23_O75077_OID20651_v1_Inflammation	5005_4_MAPK12_MK12	104	Weighted median	0.0281204489819217	0.00886474702141591	1.02851956109489	1.01080348553556	1.04654614145333	0.00151306499500481
ADAM23_O75077_OID20651_v1_Inflammation	5005_4_MAPK12_MK12	104	Inverse variance weighted	0.0300678900377915	0.00589409749585243	1.03052449392554	1.01868793288952	1.04249858891345	3.37228427547664e-07
ADAM23_O75077_OID20651_v1_Inflammation	5005_4_MAPK12_MK12	104	Simple mode	0.031320289901231	0.0147038248660887	1.03181593119012	1.0025039227552	1.06198498748191	0.0355468193755209
ADAM23_O75077_OID20651_v1_Inflammation	5005_4_MAPK12_MK12	104	Weighted mode	0.0253871072209023	0.00733079361260264	1.02571210424396	1.01107968177047	1.04055628825445	0.000779198515952761
ADAM23_O75077_OID20651_v1_Inflammation	5070_76_TNFRSF6B_DcR3	104	MR Egger	0.0194241164903829	0.00943515226849781	1.01961399203679	1.00093165176227	1.03864503727785	0.0420719073079815
ADAM23_O75077_OID20651_v1_Inflammation	5070_76_TNFRSF6B_DcR3	104	Weighted median	0.020792508966819	0.00890130253859956	1.0210101792005	1.00335155995037	1.03897958366917	0.0194967095115364
ADAM23_O75077_OID20651_v1_Inflammation	5070_76_TNFRSF6B_DcR3	104	Inverse variance weighted	0.024003035620351	0.00682146406837905	1.02429342725188	1.01068969692401	1.0380802617307	0.000433582942781614
ADAM23_O75077_OID20651_v1_Inflammation	5070_76_TNFRSF6B_DcR3	104	Simple mode	0.00680902177040577	0.013928643932398	1.00683225586302	0.979717395996113	1.03469755216048	0.625986974449997
ADAM23_O75077_OID20651_v1_Inflammation	5070_76_TNFRSF6B_DcR3	104	Weighted mode	0.017451648710159	0.00739527007313651	1.01760481845572	1.00296129536498	1.03246214119107	0.0201671769449343
ADAM23_O75077_OID20651_v1_Inflammation	5315_22_TNNT2_Troponin_T	104	MR Egger	0.00779002979901772	0.00902340970840689	1.00782045102393	0.990152949611526	1.02580319727429	0.38999067591452
ADAM23_O75077_OID20651_v1_Inflammation	5315_22_TNNT2_Troponin_T	104	Weighted median	0.0154136580223832	0.00878249166583249	1.01553	0.998201593431904	1.03316544979923	0.0792518068253407
ADAM23_O75077_OID20651_v1_Inflammation	5315_22_TNNT2_Troponin_T	104	Inverse variance weighted	0.0185123554978855	0.00659195477100991	1.01868477144936	1.00560778925975	1.03193180747608	0.00497998440532059
ADAM23_O75077_OID20651_v1_Inflammation	5315_22_TNNT2_Troponin_T	104	Simple mode	0.0264617523398263	0.0154510913975708	1.02681497324046	0.996184909221977	1.05838683110975	0.0897925126097036
ADAM23_O75077_OID20651_v1_Inflammation	5315_22_TNNT2_Troponin_T	104	Weighted mode	0.0145950740273455	0.00742032822951134	1.01470210218097	1.00005123200982	1.02956760935261	0.0518844156992981
ADAM23_O75077_OID20651_v1_Inflammation	5618_50_FAM3B_FAM3B	104	MR Egger	0.0222957401384813	0.00825857128187494	1.02254614769709	1.00612763805742	1.03923258304378	0.00812559782266942
ADAM23_O75077_OID20651_v1_Inflammation	5618_50_FAM3B_FAM3B	104	Weighted median	0.0118946694064838	0.00837291851339963	1.01196569230525	0.995493932045908	1.02870999956594	0.155429557000584
ADAM23_O75077_OID20651_v1_Inflammation	5618_50_FAM3B_FAM3B	104	Inverse variance weighted	0.0189209559273998	0.00595812607786322	1.0191	1.00726932299282	1.03107184052617	0.00149498366602223
ADAM23_O75077_OID20651_v1_Inflammation	5618_50_FAM3B_FAM3B	104	Simple mode	0.0171297577294607	0.0139375904924324	1.01727731335604	0.989863801425189	1.04545002128467	0.221859918904442
ADAM23_O75077_OID20651_v1_Inflammation	5618_50_FAM3B_FAM3B	104	Weighted mode	0.0171297577294607	0.0071748615559882	1.01727731335604	1.00307173722552	1.03168406990637	0.0187881103552709
ADAM23_O75077_OID20651_v1_Inflammation	5660_51_SOD3_SOD3	104	MR Egger	0.00582259058853491	0.00925414041994182	1.00583957481718	0.987760001074779	1.02425007002467	0.530632894767881
ADAM23_O75077_OID20651_v1_Inflammation	5660_51_SOD3_SOD3	104	Weighted median	0.0190932979192973	0.0091879804758034	1.01927674058048	1.00108544485605	1.03779860073559	0.0377025982737838
ADAM23_O75077_OID20651_v1_Inflammation	5660_51_SOD3_SOD3	104	Inverse variance weighted	0.0143529656102069	0.00672677299017976	1.01445646399788	1.00116917350052	1.02792010040504	0.0328667362567305
ADAM23_O75077_OID20651_v1_Inflammation	5660_51_SOD3_SOD3	104	Simple mode	0.0167471497500451	0.0145663986028673	1.01688816938821	0.988266390552486	1.04633888081899	0.25292545186745
ADAM23_O75077_OID20651_v1_Inflammation	5660_51_SOD3_SOD3	104	Weighted mode	0.0138032152025724	0.00787924031443198	1.01389891941249	0.99836124840844	1.02967840591231	0.0827766474820904
ADAM23_O75077_OID20651_v1_Inflammation	6119_14_MAMDC2_MAMC2	104	MR Egger	0.0204796268350979	0.00839095143664204	1.02069077332993	1.0040415069707	1.03761612197099	0.0163830722488064
ADAM23_O75077_OID20651_v1_Inflammation	6119_14_MAMDC2_MAMC2	104	Weighted median	0.0231321284820076	0.00791757760940282	1.02340175113423	1.00764273410007	1.03940723113535	0.0034821957991959
ADAM23_O75077_OID20651_v1_Inflammation	6119_14_MAMDC2_MAMC2	104	Inverse variance weighted	0.025054881772725	0.00606262018129464	1.02537	1.01325928109952	1.03762828879397	3.5855452286718e-05
ADAM23_O75077_OID20651_v1_Inflammation	6119_14_MAMDC2_MAMC2	104	Simple mode	0.0288366211057633	0.0134439484770739	1.02925642196148	1.00248957595104	1.05673795275522	0.0343076239464019
ADAM23_O75077_OID20651_v1_Inflammation	6119_14_MAMDC2_MAMC2	104	Weighted mode	0.0217993398557008	0.00708496579779637	1.02203868146383	1.00794419588553	1.03633025585371	0.00268019397037149
ADAM23_O75077_OID20651_v1_Inflammation	6604_59_NDNF_CD031	104	MR Egger	0.0195254497593174	0.00933804632350322	1.01971731809075	1.00122362698662	1.03855260781624	0.0390168996476322
ADAM23_O75077_OID20651_v1_Inflammation	6604_59_NDNF_CD031	104	Weighted median	0.0152511282517883	0.0087283962214519	1.01536802019694	0.998145193940498	1.03288802340324	0.0805852826291589
ADAM23_O75077_OID20651_v1_Inflammation	6604_59_NDNF_CD031	104	Inverse variance weighted	0.0273949296285846	0.00679553421537061	1.02777362087778	1.01417521141688	1.04155436248186	5.5465972311092e-05
ADAM23_O75077_OID20651_v1_Inflammation	6604_59_NDNF_CD031	104	Simple mode	0.0291598394012864	0.0145650136110879	1.02958915023688	1.00061260028651	1.0594048265852	0.0479086285144841
ADAM23_O75077_OID20651_v1_Inflammation	6604_59_NDNF_CD031	104	Weighted mode	0.0178315203641064	0.00710292882817724	1.01799145111192	1.00391743302097	1.03226277425875	0.0136135971386575
ADAM23_O75077_OID20651_v1_Inflammation	6986_17_HS3ST3B1_HS3SB	104	MR Egger	0.0143427625584418	0.0102759639002619	1.01444611349887	0.994218650010331	1.03508510646251	0.165818157309848
ADAM23_O75077_OID20651_v1_Inflammation	6986_17_HS3ST3B1_HS3SB	104	Weighted median	0.0178712933803934	0.00926557955220951	1.01803194050767	0.999710799284654	1.03668884304881	0.0537577930077112
ADAM23_O75077_OID20651_v1_Inflammation	6986_17_HS3ST3B1_HS3SB	104	Inverse variance weighted	0.0240348709427652	0.00749371154294574	1.02432603648244	1.00939101778764	1.03948203473767	0.00133969170594914
ADAM23_O75077_OID20651_v1_Inflammation	6986_17_HS3ST3B1_HS3SB	104	Simple mode	0.0307287115817251	0.0140665887570666	1.0312057117696	1.00316318997821	1.06003213695405	0.031192002864637
ADAM23_O75077_OID20651_v1_Inflammation	6986_17_HS3ST3B1_HS3SB	104	Weighted mode	0.0200291280705475	0.00769091280361075	1.02023105695616	1.00496723498587	1.03572671162012	0.0105678382132263
ADAM23_O75077_OID20651_v1_Inflammation	7003_4_GALNT10_GLT10	104	MR Egger	0.0229652598387035	0.00935387847275924	1.02323099172006	1.00464240073927	1.04216352171277	0.0157737956179144
ADAM23_O75077_OID20651_v1_Inflammation	7003_4_GALNT10_GLT10	104	Weighted median	0.0185801038749765	0.00889217533467184	1.01875378802725	1.00115210338081	1.03666493544297	0.0366637136983983
ADAM23_O75077_OID20651_v1_Inflammation	7003_4_GALNT10_GLT10	104	Inverse variance weighted	0.0199114972906369	0.00675588182606025	1.02011105343943	1.00669226269291	1.03370871110663	0.0032057941541696
ADAM23_O75077_OID20651_v1_Inflammation	7003_4_GALNT10_GLT10	104	Simple mode	0.0361795651876455	0.0162411762844835	1.03684201050631	1.00435632096857	1.07037844269655	0.0280793773275986
ADAM23_O75077_OID20651_v1_Inflammation	7003_4_GALNT10_GLT10	104	Weighted mode	0.0209007534122037	0.00824593287195406	1.02112070386281	1.00474997049652	1.03775817116175	0.0127595794246997
ADAM23_O75077_OID20651_v1_Inflammation	7009_8_CD72_CD72	104	MR Egger	0.0218122269244733	0.00954552877960924	1.02205185263147	1.00310780977493	1.04135366038253	0.0243784783512846
ADAM23_O75077_OID20651_v1_Inflammation	7009_8_CD72_CD72	104	Weighted median	0.0220690955854468	0.00859650236127481	1.02231441944345	1.00523359863775	1.03968547571262	0.0102518138723185
ADAM23_O75077_OID20651_v1_Inflammation	7009_8_CD72_CD72	104	Inverse variance weighted	0.0213501520352719	0.00688320717833825	1.02157969722889	1.00789002948629	1.03545530490285	0.00192364854061289
ADAM23_O75077_OID20651_v1_Inflammation	7009_8_CD72_CD72	104	Simple mode	0.0183140231499319	0.0131786599751594	1.01848275334084	0.992512025222114	1.0451330487614	0.16762480494307
ADAM23_O75077_OID20651_v1_Inflammation	7009_8_CD72_CD72	104	Weighted mode	0.0183140231499319	0.00765568020868594	1.01848275334084	1.00331437036026	1.03388045611294	0.0185598850356259
ADAM23_O75077_OID20651_v1_Inflammation	7121_2_SYT7_SYT7	104	MR Egger	0.0187850013616058	0.00932409441308846	1.01896254950453	1.00050990626998	1.0377555192468	0.0465707384081017
ADAM23_O75077_OID20651_v1_Inflammation	7121_2_SYT7_SYT7	104	Weighted median	0.0151113708245072	0.00837438620007763	1.01522612489038	0.998698421661163	1.03202734910263	0.0711568695232102
ADAM23_O75077_OID20651_v1_Inflammation	7121_2_SYT7_SYT7	104	Inverse variance weighted	0.0190890465925537	0.00674330204334099	1.01927240731123	1.00588944960221	1.03283341993185	0.0046429437866279
ADAM23_O75077_OID20651_v1_Inflammation	7121_2_SYT7_SYT7	104	Simple mode	0.0174468462575172	0.0138112048790993	1.01759993146851	0.990423038701483	1.04552254951817	0.20935547013286
ADAM23_O75077_OID20651_v1_Inflammation	7121_2_SYT7_SYT7	104	Weighted mode	0.0140991620460379	0.00692747892591261	1.0141990240026	1.00052143925346	1.02806358757822	0.0443937424720453
ADAM23_O75077_OID20651_v1_Inflammation	7738_299_STX2_STX2	104	MR Egger	0.00495261845703967	0.00916851520873221	1.00496490294358	0.98706669206313	1.02318765719613	0.590252655778789
ADAM23_O75077_OID20651_v1_Inflammation	7738_299_STX2_STX2	104	Weighted median	0.00468066039403056	0.00912914059033536	1.00469163179602	0.986874446174988	1.02283049167326	0.608149693383285
ADAM23_O75077_OID20651_v1_Inflammation	7738_299_STX2_STX2	104	Inverse variance weighted	0.0208764121407283	0.00679868584705377	1.02109584878906	1.00757956848146	1.03479344463646	0.00213590480590865
ADAM23_O75077_OID20651_v1_Inflammation	7738_299_STX2_STX2	104	Simple mode	0.00857413747954294	0.0147879196101793	1.00861100067769	0.979796693005446	1.03827269264155	0.563310995832747
ADAM23_O75077_OID20651_v1_Inflammation	7738_299_STX2_STX2	104	Weighted mode	0.0122463281591585	0.00752702086437886	1.01232162147749	0.997496506245505	1.02736707236004	0.106796426709704
ADAM23_O75077_OID20651_v1_Inflammation	7765_15_ITM2A_ITM2A	104	MR Egger	0.00159562213700012	0.0104500838860149	1.00159689581935	0.981290690931991	1.02232330438411	0.878944475505854
ADAM23_O75077_OID20651_v1_Inflammation	7765_15_ITM2A_ITM2A	104	Weighted median	0.00240234125343722	0.0089086523161621	1.00240522918732	0.985054196706903	1.0200618878243	0.787418893772433
ADAM23_O75077_OID20651_v1_Inflammation	7765_15_ITM2A_ITM2A	104	Inverse variance weighted	0.01653617366425	0.00769302046027692	1.01667365293226	1.0014589167472	1.03211954008448	0.0315945165648195
ADAM23_O75077_OID20651_v1_Inflammation	7765_15_ITM2A_ITM2A	104	Simple mode	0.0135504393538057	0.0160196478880867	1.0136426626417	0.982310262922119	1.04597446072781	0.39958955692304
ADAM23_O75077_OID20651_v1_Inflammation	7765_15_ITM2A_ITM2A	104	Weighted mode	0.00429634738205742	0.00763349242088269	1.00430558991411	0.989391374869539	1.01944462378775	0.574774699819977
ADAM23_O75077_OID20651_v1_Inflammation	7898_29_MDM1_MDM1	104	MR Egger	0.0196205938712739	0.00880215985958799	1.01981434280502	1.00237116732771	1.03756106289798	0.0280031047077422
ADAM23_O75077_OID20651_v1_Inflammation	7898_29_MDM1_MDM1	104	Weighted median	0.0183823235746418	0.00839284459453848	1.01855231852109	1.00193421635721	1.03544604887994	0.0285070116266864
ADAM23_O75077_OID20651_v1_Inflammation	7898_29_MDM1_MDM1	104	Inverse variance weighted	0.0218347028115566	0.00634612768065312	1.02207482441166	1.00944057630674	1.03486720389045	0.000580352936722519
ADAM23_O75077_OID20651_v1_Inflammation	7898_29_MDM1_MDM1	104	Simple mode	0.0319131964759772	0.0141347786492447	1.03242788303686	1.0042179007325	1.06143032592278	0.0260689738489378
ADAM23_O75077_OID20651_v1_Inflammation	7898_29_MDM1_MDM1	104	Weighted mode	0.0179738581348931	0.00731225350137097	1.01813636005851	1.00364848083376	1.0328333749004	0.015638057364196
ADAM23_O75077_OID20651_v1_Inflammation	7939_1_PQLC2L_CC055	104	MR Egger	0.017641285297677	0.0084115255073212	1.01779781185966	1.00115536222062	1.03472	0.0384414462101506
ADAM23_O75077_OID20651_v1_Inflammation	7939_1_PQLC2L_CC055	104	Weighted median	0.0118451286782623	0.00872083920941285	1.01191556002972	0.994766029036163	1.02936074488028	0.174382594107688
ADAM23_O75077_OID20651_v1_Inflammation	7939_1_PQLC2L_CC055	104	Inverse variance weighted	0.020163204390003	0.00607329904448673	1.02036785495175	1.00829374235411	1.0325865525933	0.000900253293386444
ADAM23_O75077_OID20651_v1_Inflammation	7939_1_PQLC2L_CC055	104	Simple mode	0.0291236985533317	0.0147368374827266	1.02955194068434	1.0002395257689	1.05972336751246	0.050800484336734
ADAM23_O75077_OID20651_v1_Inflammation	7939_1_PQLC2L_CC055	104	Weighted mode	0.0141943377970553	0.00837430836920829	1.01429555575006	0.997783154233524	1.03108122245722	0.0930993103239649
ADAM23_O75077_OID20651_v1_Inflammation	8064_125_PVR_Poliovirus_receptor	104	MR Egger	0.0264494426598061	0.00902876162331221	1.02680233355449	1.00879149001048	1.0451347405617	0.00418953570398172
ADAM23_O75077_OID20651_v1_Inflammation	8064_125_PVR_Poliovirus_receptor	104	Weighted median	0.0252319209383394	0.00914753012949435	1.02555294014588	1.00732949207856	1.04410606590265	0.00580972398844064
ADAM23_O75077_OID20651_v1_Inflammation	8064_125_PVR_Poliovirus_receptor	104	Inverse variance weighted	0.034722987307093	0.00656948911022492	1.03533286872627	1.02208717711858	1.04875021726312	1.25366812756675e-07
ADAM23_O75077_OID20651_v1_Inflammation	8064_125_PVR_Poliovirus_receptor	104	Simple mode	0.0363932185595156	0.0134361965522229	1.0370635589644	1.01010902777289	1.0647373657309	0.00791385856627553
ADAM23_O75077_OID20651_v1_Inflammation	8064_125_PVR_Poliovirus_receptor	104	Weighted mode	0.0272583576092765	0.00689506967330514	1.02763326534352	1.01383890430105	1.04161531339994	0.000141573027670094
ADAM23_O75077_OID20651_v1_Inflammation	8099_42_SPON2_SPON2	104	MR Egger	0.00801977594738966	0.00861275803538892	1.00805202049088	0.991177915185256	1.02521339554445	0.353974286807949
ADAM23_O75077_OID20651_v1_Inflammation	8099_42_SPON2_SPON2	104	Weighted median	0.0204462887021433	0.0086578107532599	1.02065674597243	1.00348303133127	1.03812437338079	0.0181962476318139
ADAM23_O75077_OID20651_v1_Inflammation	8099_42_SPON2_SPON2	104	Inverse variance weighted	0.0169058646571644	0.00628122922252254	1.01704957750817	1.00460522699483	1.02964807997646	0.007113366422203
ADAM23_O75077_OID20651_v1_Inflammation	8099_42_SPON2_SPON2	104	Simple mode	0.0198930002817197	0.0156711119999755	1.02009218461069	0.989235972018441	1.05191086306797	0.207157129854019
ADAM23_O75077_OID20651_v1_Inflammation	8099_42_SPON2_SPON2	104	Weighted mode	0.0161643780686438	0.00749913181186122	1.01629572840562	1.00146715493765	1.03134386632961	0.0334516879433128
ADAM23_O75077_OID20651_v1_Inflammation	8253_2_POMGNT1_PMGT1	104	MR Egger	0.00940106695073794	0.00897144409928752	1.00944539578453	0.991850425825253	1.02735249241109	0.29716699611844
ADAM23_O75077_OID20651_v1_Inflammation	8253_2_POMGNT1_PMGT1	104	Weighted median	0.00748334879299683	0.00831982379790386	1.00751141902366	0.991215307037718	1.02407544784259	0.368407687489555
ADAM23_O75077_OID20651_v1_Inflammation	8253_2_POMGNT1_PMGT1	104	Inverse variance weighted	0.0178335096790401	0.00651661770496677	1.01799347621953	1.00507376716073	1.03107926152827	0.00620738541692311
ADAM23_O75077_OID20651_v1_Inflammation	8253_2_POMGNT1_PMGT1	104	Simple mode	0.0146457729450397	0.0142165260626417	1.01475354778344	0.986868364111475	1.0434266617374	0.305332229421355
ADAM23_O75077_OID20651_v1_Inflammation	8253_2_POMGNT1_PMGT1	104	Weighted mode	0.0119875937995861	0.0067840745313221	1.01205973297231	0.998691664336543	1.0256067409799	0.0801868791966183
ADAM23_O75077_OID20651_v1_Inflammation	8363_18_KIAA1324L_K132L	104	MR Egger	0.0208733456900404	0.00944133091602128	1.02109271765379	1.00237114382026	1.0401639597005	0.0292797064450141
ADAM23_O75077_OID20651_v1_Inflammation	8363_18_KIAA1324L_K132L	104	Weighted median	0.0187814541668056	0.00848249129298035	1.01895893505228	1.00215809657804	1.03604143384978	0.0268188992802586
ADAM23_O75077_OID20651_v1_Inflammation	8363_18_KIAA1324L_K132L	104	Inverse variance weighted	0.0176325661286738	0.00676386446241694	1.01778893754722	1.0043849777847	1.03137177905457	0.00913720408885521
ADAM23_O75077_OID20651_v1_Inflammation	8363_18_KIAA1324L_K132L	104	Simple mode	0.0209410130263976	0.014781149118223	1.02116181461594	0.992002115394585	1.05117865722993	0.159577067620862
ADAM23_O75077_OID20651_v1_Inflammation	8363_18_KIAA1324L_K132L	104	Weighted mode	0.0171858398885227	0.00754219037482231	1.01733436606394	1.0024060366255	1.03248501561189	0.0247529821832397
ADAM23_O75077_OID20651_v1_Inflammation	8815_1_OLFML1_OLFL1	104	MR Egger	0.0126740943058906	0.00901570858674002	1.01275475102924	0.995015768187869	1.03080998163502	0.162828593468167
ADAM23_O75077_OID20651_v1_Inflammation	8815_1_OLFML1_OLFL1	104	Weighted median	0.00539102094170137	0.00871698209852544	1.00540557864363	0.988373848167855	1.02273080114527	0.536278493069146
ADAM23_O75077_OID20651_v1_Inflammation	8815_1_OLFML1_OLFL1	104	Inverse variance weighted	0.0187226431505028	0.00652010860471177	1.01889901080386	1.00596092631821	1.0320034974089	0.00408498790747266
ADAM23_O75077_OID20651_v1_Inflammation	8815_1_OLFML1_OLFL1	104	Simple mode	0.0178000360013125	0.0147443435757459	1.01795940080429	0.988962487894223	1.04780651882184	0.23010284351206
ADAM23_O75077_OID20651_v1_Inflammation	8815_1_OLFML1_OLFL1	104	Weighted mode	0.0112728462164854	0.00802040292064901	1.01133662417514	0.995562730392397	1.02736044266626	0.162875573539692
ADAM23_O75077_OID20651_v1_Inflammation	8932_1_ENTPD6_ENTP6	104	MR Egger	-0.000639114	0.00986098053537241	0.999361089988675	0.980231377151223	1.01886412888136	0.948450191785968
ADAM23_O75077_OID20651_v1_Inflammation	8932_1_ENTPD6_ENTP6	104	Weighted median	0.00357408033426745	0.00834413819269751	1.00358047497544	0.987300892362932	1.02012849126615	0.668407772627698
ADAM23_O75077_OID20651_v1_Inflammation	8932_1_ENTPD6_ENTP6	104	Inverse variance weighted	0.015294829741165	0.00729981066242759	1.01541239426129	1.00098768828595	1.03004496707146	0.0361499741368567
ADAM23_O75077_OID20651_v1_Inflammation	8932_1_ENTPD6_ENTP6	104	Simple mode	0.0134280939902734	0.0140385930922279	1.01351865574764	0.986011216710082	1.04179348889754	0.341052905486114
ADAM23_O75077_OID20651_v1_Inflammation	8932_1_ENTPD6_ENTP6	104	Weighted mode	0.00585060893077705	0.00724610456952421	1.00586775716944	0.991683022999538	1.02025538548879	0.421288455839054
ADAM23_O75077_OID20651_v1_Inflammation	9060_27_IGSF9B_TUTLB	104	MR Egger	0.0251313335937748	0.0084597327958733	1.02544978768693	1.00858691516747	1.04259459571965	0.00370530013760612
ADAM23_O75077_OID20651_v1_Inflammation	9060_27_IGSF9B_TUTLB	104	Weighted median	0.0203306629944712	0.00842442323107121	1.02053873863636	1.00382609434389	1.03752963080545	0.0158087890046846
ADAM23_O75077_OID20651_v1_Inflammation	9060_27_IGSF9B_TUTLB	104	Inverse variance weighted	0.0256263966730722	0.0061058080802485	1.02595757569966	1.0137527233298	1.03830936569834	2.7041134274213e-05
ADAM23_O75077_OID20651_v1_Inflammation	9060_27_IGSF9B_TUTLB	104	Simple mode	0.0251942265218468	0.0147309008741352	1.0255142832548	0.996328417611003	1.05555510268524	0.0902214365248478
ADAM23_O75077_OID20651_v1_Inflammation	9060_27_IGSF9B_TUTLB	104	Weighted mode	0.0188337517571653	0.0073681402367704	1.01901222554273	1.00440185672732	1.03383512172006	0.0120445429448599
ADAM23_O75077_OID20651_v1_Inflammation	9092_33_ANGPTL1_ANGL1	104	MR Egger	0.00881155484122723	0.00983665380451814	1.00885049086888	0.989586315201455	1.02848968027532	0.372475264861321
ADAM23_O75077_OID20651_v1_Inflammation	9092_33_ANGPTL1_ANGL1	104	Weighted median	0.00705144138033713	0.00835983145936832	1.00707636133253	0.990709596683083	1.02371350893375	0.39895397851276
ADAM23_O75077_OID20651_v1_Inflammation	9092_33_ANGPTL1_ANGL1	104	Inverse variance weighted	0.0229745219343544	0.00725118735523479	1.02324046902726	1.0088006951134	1.03788693101311	0.00153290656703878
ADAM23_O75077_OID20651_v1_Inflammation	9092_33_ANGPTL1_ANGL1	104	Simple mode	0.0122628305965701	0.0135026087992557	1.01233832738953	0.985898094011821	1.03948764616391	0.365901934101182
ADAM23_O75077_OID20651_v1_Inflammation	9092_33_ANGPTL1_ANGL1	104	Weighted mode	0.0122628305965701	0.00716644647400679	1.01233832738953	0.998218184828368	1.02665820426628	0.0900642945185185
ADAM23_O75077_OID20651_v1_Inflammation	9294_45_MFAP2_MFAP2	104	MR Egger	0.00989930505166736	0.00902943582365609	1.0099484652553	0.992231939384921	1.02798132370524	0.275513011156852
ADAM23_O75077_OID20651_v1_Inflammation	9294_45_MFAP2_MFAP2	104	Weighted median	0.0199120626203214	0.00898794502012128	1.02011163013865	1.00229832749566	1.03824151891409	0.0267313302074614
ADAM23_O75077_OID20651_v1_Inflammation	9294_45_MFAP2_MFAP2	104	Inverse variance weighted	0.0250428551405876	0.00668952849819095	1.02535906148961	1.01200284212388	1.03889155367624	0.000181409241398105
ADAM23_O75077_OID20651_v1_Inflammation	9294_45_MFAP2_MFAP2	104	Simple mode	0.0333532762773961	0.0143924475631499	1.03391573263159	1.0051573325442	1.06349693483046	0.0224593106176899
ADAM23_O75077_OID20651_v1_Inflammation	9294_45_MFAP2_MFAP2	104	Weighted mode	0.0226291507173597	0.0078958760319644	1.02288713224089	1.00717887918378	1.03884037575521	0.00504131687218203
ADAM23_O75077_OID20651_v1_Inflammation	9783_75_DNAJC11_DJC11	104	MR Egger	0.0179036990026185	0.00927600809073937	1.01806493100068	0.999722761582444	1.03674362889651	0.0563709487337347
ADAM23_O75077_OID20651_v1_Inflammation	9783_75_DNAJC11_DJC11	104	Weighted median	0.0258623324962999	0.00892706988034991	1.02619966440246	1.00840036221652	1.04431314255478	0.00376667562365744
ADAM23_O75077_OID20651_v1_Inflammation	9783_75_DNAJC11_DJC11	104	Inverse variance weighted	0.0235355328745784	0.00659180349894251	1.0238146791789	1.01067214338779	1.03712811732261	0.000356403965338957
ADAM23_O75077_OID20651_v1_Inflammation	9783_75_DNAJC11_DJC11	104	Simple mode	0.0070208367879937	0.0141912000881393	1.00704554064267	0.979420787328578	1.03544945548317	0.621843154924803
ADAM23_O75077_OID20651_v1_Inflammation	9783_75_DNAJC11_DJC11	104	Weighted mode	0.0215542871944346	0.0080429929111167	1.02178825884963	1.00580681565874	1.03802363403073	0.00857614254967024
ADAM23_O75077_OID20651_v1_Inflammation	9931_20_KRT1_Keratin_1	104	MR Egger	0.0213538803216136	0.00979352999990156	1.02158350597762	1.0021608928929	1.04138254354838	0.0315263375552781
ADAM23_O75077_OID20651_v1_Inflammation	9931_20_KRT1_Keratin_1	104	Weighted median	0.0244628703480009	0.00967270444437573	1.02476454125002	1.00551954651318	1.04437787275734	0.0114367785141753
ADAM23_O75077_OID20651_v1_Inflammation	9931_20_KRT1_Keratin_1	104	Inverse variance weighted	0.0268518578906985	0.00707638668834885	1.02721561760295	1.01306677380695	1.04156206908479	0.00014789843582212
ADAM23_O75077_OID20651_v1_Inflammation	9931_20_KRT1_Keratin_1	104	Simple mode	0.042640524912977	0.0158766382141674	1.04356269262698	1.01158895156698	1.07654704191455	0.00843710909662073
ADAM23_O75077_OID20651_v1_Inflammation	9931_20_KRT1_Keratin_1	104	Weighted mode	0.0264622467129628	0.00800569292748001	1.02681548087032	1.01082930558208	1.04305447609457	0.00130567757471583
ADAM23_O75077_OID20651_v1_Inflammation	9959_60_TMEM59L_TM59L	104	MR Egger	0.0139647172903848	0.00998781459697737	1.01406267942825	0.994404315174298	1.03410966959546	0.165093235434491
ADAM23_O75077_OID20651_v1_Inflammation	9959_60_TMEM59L_TM59L	104	Weighted median	0.0144852977708013	0.00837298530838481	1.01459071809646	0.998076099639799	1.03137859489772	0.0836295670692492
ADAM23_O75077_OID20651_v1_Inflammation	9959_60_TMEM59L_TM59L	104	Inverse variance weighted	0.0254994430401987	0.00729877349532207	1.0258273349257	1.0112567325192	1.04060787655698	0.000476444933076168
ADAM23_O75077_OID20651_v1_Inflammation	9959_60_TMEM59L_TM59L	104	Simple mode	0.0366555451266816	0.0151869727670505	1.03733564397376	1.00691286279048	1.06867761652813	0.0175607007449444
ADAM23_O75077_OID20651_v1_Inflammation	9959_60_TMEM59L_TM59L	104	Weighted mode	0.0193401008610259	0.0073137003578897	1.01952833212398	1.00501779533931	1.03424837333609	0.00946480875063403
AHNAK2_Q8IVF2_OID30244_v1_Cardiometabolic_II	17427_26_NLGN3_NLGN3	21	MR Egger	-0.00798454	0.0429094007530659	0.992047252963086	0.912025832433363	1.07908977697023	0.854355083407362
AHNAK2_Q8IVF2_OID30244_v1_Cardiometabolic_II	17427_26_NLGN3_NLGN3	21	Weighted median	-0.00471208	0.033898350327249	0.995299006508974	0.931319534129247	1.06367371890674	0.889445318543605
AHNAK2_Q8IVF2_OID30244_v1_Cardiometabolic_II	17427_26_NLGN3_NLGN3	21	Inverse variance weighted	-0.048274	0.0244342515088097	0.952872693907205	0.908314039427375	0.999617237410951	0.0481923914372644
AHNAK2_Q8IVF2_OID30244_v1_Cardiometabolic_II	17427_26_NLGN3_NLGN3	21	Simple mode	-0.00672803	0.0556938813324307	0.993294548784134	0.890574925440271	1.10786193554295	0.905051839796558
AHNAK2_Q8IVF2_OID30244_v1_Cardiometabolic_II	17427_26_NLGN3_NLGN3	21	Weighted mode	-0.00491759	0.0434430044602903	0.995094481932573	0.913870978968893	1.08353700988503	0.911003426404742
AHNAK2_Q8IVF2_OID30244_v1_Cardiometabolic_II	8253_2_POMGNT1_PMGT1	21	MR Egger	-0.0115678	0.0436578118137294	0.988498882036808	0.907431608246927	1.07680846788635	0.793890100820236
AHNAK2_Q8IVF2_OID30244_v1_Cardiometabolic_II	8253_2_POMGNT1_PMGT1	21	Weighted median	-0.0337209	0.0354107455182534	0.966841315234413	0.90201335027714	1.03632848511278	0.340955680766753
AHNAK2_Q8IVF2_OID30244_v1_Cardiometabolic_II	8253_2_POMGNT1_PMGT1	21	Inverse variance weighted	-0.049338	0.0247990312066778	0.951859329456844	0.906699569209368	0.999268350666677	0.0466445047033512
AHNAK2_Q8IVF2_OID30244_v1_Cardiometabolic_II	8253_2_POMGNT1_PMGT1	21	Simple mode	-0.0132147	0.0479180901501174	0.986872248735792	0.898405154165012	1.08405081027169	0.785549085160021
AHNAK2_Q8IVF2_OID30244_v1_Cardiometabolic_II	8253_2_POMGNT1_PMGT1	21	Weighted mode	-0.0316571	0.0410465476931025	0.968838752022447	0.893947418978558	1.05000418088676	0.449576258610576
AHNAK2_Q8IVF2_OID30244_v1_Cardiometabolic_II	9177_6_FAM3B_FAM3B	21	MR Egger	0.0249865255386393	0.0595539221976144	1.02530130504853	0.912343092287559	1.15224499973842	0.679511757581081
AHNAK2_Q8IVF2_OID30244_v1_Cardiometabolic_II	9177_6_FAM3B_FAM3B	21	Weighted median	0.0584652905521092	0.0396838810396788	1.06020818581517	0.9808702253562	1.14596341922939	0.140676758243749
AHNAK2_Q8IVF2_OID30244_v1_Cardiometabolic_II	9177_6_FAM3B_FAM3B	21	Inverse variance weighted	0.079079133070595	0.0338264691484056	1.08228996360983	1.01286125714287	1.1564778068763	0.0193982186382922
AHNAK2_Q8IVF2_OID30244_v1_Cardiometabolic_II	9177_6_FAM3B_FAM3B	21	Simple mode	0.18451543203948	0.0737189950518788	1.20263554026081	1.04083804560067	1.38958433428875	0.0210999001677563
AHNAK2_Q8IVF2_OID30244_v1_Cardiometabolic_II	9177_6_FAM3B_FAM3B	21	Weighted mode	0.0308840681189583	0.0439351380376143	1.03136592876321	0.946268614619784	1.12411598839829	0.490191178688555
ALDH5A1_P51649_OID31047_v1_Neurology_II	10916_44_PLA2R1_PLA2R	13	MR Egger	-0.237656	0.0922159287851403	0.78847360203341	0.658099217682088	0.944676128461627	0.0257195804775334
ALDH5A1_P51649_OID31047_v1_Neurology_II	10916_44_PLA2R1_PLA2R	13	Weighted median	-0.1615	0.0397891926472135	0.850866362979295	0.787031492402914	0.919878778216644	4.93052482715082e-05
ALDH5A1_P51649_OID31047_v1_Neurology_II	10916_44_PLA2R1_PLA2R	13	Inverse variance weighted	-0.12393	0.0448868902823204	0.883441477062149	0.809038693509987	0.964686670309568	0.0057634404962952
ALDH5A1_P51649_OID31047_v1_Neurology_II	10916_44_PLA2R1_PLA2R	13	Simple mode	-0.18042	0.0658599666638954	0.834919465758883	0.733809704880349	0.949960881774876	0.0179496679418996
ALDH5A1_P51649_OID31047_v1_Neurology_II	10916_44_PLA2R1_PLA2R	13	Weighted mode	-0.176125	0.0389769105959607	0.838512828214435	0.776840564315737	0.905081165141632	0.000703377889231809
ALDH5A1_P51649_OID31047_v1_Neurology_II	11358_15_GRB10_GRB10	13	MR Egger	0.00398877571567322	0.143659965052639	1.00399674146921	0.757611349935149	1.33050997317698	0.978346595546178
ALDH5A1_P51649_OID31047_v1_Neurology_II	11358_15_GRB10_GRB10	13	Weighted median	0.0780643134738437	0.0442536758184763	1.08119219165984	0.991364609897489	1.17915905372807	0.0777288240818478
ALDH5A1_P51649_OID31047_v1_Neurology_II	11358_15_GRB10_GRB10	13	Inverse variance weighted	0.134448652862586	0.0685313400476394	1.14390592119987	1.00012723446283	1.30835428880101	0.049779197010065
ALDH5A1_P51649_OID31047_v1_Neurology_II	11358_15_GRB10_GRB10	13	Simple mode	0.103741215084272	0.0631139302457292	1.10931334420693	0.980235835109839	1.25538778685607	0.1261599026663
ALDH5A1_P51649_OID31047_v1_Neurology_II	11358_15_GRB10_GRB10	13	Weighted mode	0.0750857814158792	0.0459856059414709	1.07797661727914	0.985066619359696	1.17964974608105	0.128454237489458
ALDH5A1_P51649_OID31047_v1_Neurology_II	12781_2_TARBP2_TRBP2	13	MR Egger	0.126175867254808	0.079188600667055	1.13448166891644	0.971383640807715	1.32496	0.139386657584493
ALDH5A1_P51649_OID31047_v1_Neurology_II	12781_2_TARBP2_TRBP2	13	Weighted median	0.0592863856951328	0.0431596691061597	1.06107907509969	0.97501096123718	1.15474476531606	0.169549601914818
ALDH5A1_P51649_OID31047_v1_Neurology_II	12781_2_TARBP2_TRBP2	13	Inverse variance weighted	0.105461367798782	0.035626296046993	1.11122317469634	1.03627632116646	1.1915904269551	0.0030742800578314
ALDH5A1_P51649_OID31047_v1_Neurology_II	12781_2_TARBP2_TRBP2	13	Simple mode	0.0984351684735322	0.079593595444285	1.10344286419013	0.94405742926878	1.28973737908636	0.239847938349267
ALDH5A1_P51649_OID31047_v1_Neurology_II	12781_2_TARBP2_TRBP2	13	Weighted mode	0.0702117624450549	0.0453268610634088	1.07273532225814	0.981543559962496	1.17239939067426	0.147338093789237
ALDH5A1_P51649_OID31047_v1_Neurology_II	13111_79_BCL6_BCL6	13	MR Egger	-0.182959	0.0942547894638743	0.832801940830602	0.692325665942725	1.0017815412156	0.0782927955560203
ALDH5A1_P51649_OID31047_v1_Neurology_II	13111_79_BCL6_BCL6	13	Weighted median	-0.106644	0.0438345632344266	0.898845307806371	0.824844764445084	0.979484773609567	0.0149791713690868
ALDH5A1_P51649_OID31047_v1_Neurology_II	13111_79_BCL6_BCL6	13	Inverse variance weighted	-0.103459	0.0440272213389495	0.901713001583278	0.827163961162775	0.98298085434155	0.0187791173984855
ALDH5A1_P51649_OID31047_v1_Neurology_II	13111_79_BCL6_BCL6	13	Simple mode	-0.104	0.0573796100649092	0.901225627179792	0.805361793324458	1.00850032596269	0.0949891697275455
ALDH5A1_P51649_OID31047_v1_Neurology_II	13111_79_BCL6_BCL6	13	Weighted mode	-0.112068	0.0472153611832444	0.893983481828285	0.814965018620389	0.980663522386222	0.0351734944347463
ALDH5A1_P51649_OID31047_v1_Neurology_II	15585_304_FBLN5_fibulin_5	13	MR Egger	-0.156326	0.0935753045044424	0.855280146753401	0.711959818737274	1.02745142377264	0.122978223640933
ALDH5A1_P51649_OID31047_v1_Neurology_II	15585_304_FBLN5_fibulin_5	13	Weighted median	-0.13483	0.0459236302950853	0.873864345539217	0.798643638731118	0.956169757537856	0.00332512882585455
ALDH5A1_P51649_OID31047_v1_Neurology_II	15585_304_FBLN5_fibulin_5	13	Inverse variance weighted	-0.0938242	0.0430330776619503	0.910442788812104	0.836800951235296	0.990565403249507	0.0292366125751366
ALDH5A1_P51649_OID31047_v1_Neurology_II	15585_304_FBLN5_fibulin_5	13	Simple mode	-0.175757	0.0858168914875785	0.83882170047187	0.708958550022122	0.992472472700363	0.0630887226889295
ALDH5A1_P51649_OID31047_v1_Neurology_II	15585_304_FBLN5_fibulin_5	13	Weighted mode	-0.155046	0.0477055084948771	0.85637593360883	0.779931938746742	0.940312485269997	0.00695564021719128
ALDH5A1_P51649_OID31047_v1_Neurology_II	16900_29_MDGA1_MDGA1	13	MR Egger	0.184263267106509	0.101143966661614	1.20233231598328	0.986118343695113	1.46595285170425	0.0957636525617748
ALDH5A1_P51649_OID31047_v1_Neurology_II	16900_29_MDGA1_MDGA1	13	Weighted median	0.135863631946587	0.0503983763786547	1.14552566983741	1.03777896016007	1.26445910991878	0.00702211152683892
ALDH5A1_P51649_OID31047_v1_Neurology_II	16900_29_MDGA1_MDGA1	13	Inverse variance weighted	0.149352376864334	0.0461955792808049	1.16108205558607	1.06057269600316	1.27111658152659	0.00122478358622246
ALDH5A1_P51649_OID31047_v1_Neurology_II	16900_29_MDGA1_MDGA1	13	Simple mode	0.302954501619788	0.117858160599061	1.35385286492856	1.07460430650364	1.70566744315301	0.0245229560757585
ALDH5A1_P51649_OID31047_v1_Neurology_II	16900_29_MDGA1_MDGA1	13	Weighted mode	0.116287487625666	0.0567161453209287	1.12331876596193	1.00513699212792	1.25539609012982	0.0628337756379829
ALDH5A1_P51649_OID31047_v1_Neurology_II	19361_78_MATN3_MATN3	13	MR Egger	-0.140064	0.0663306485780055	0.869302656842705	0.763324530081033	0.98999452973634	0.0584144386667624
ALDH5A1_P51649_OID31047_v1_Neurology_II	19361_78_MATN3_MATN3	13	Weighted median	-0.13075	0.0415756150377913	0.877437398491986	0.808772290068655	0.951932203571205	0.00166163892952294
ALDH5A1_P51649_OID31047_v1_Neurology_II	19361_78_MATN3_MATN3	13	Inverse variance weighted	-0.109439	0.0308663448458859	0.896336479794847	0.843717600520635	0.952236962361874	0.000391735315401328
ALDH5A1_P51649_OID31047_v1_Neurology_II	19361_78_MATN3_MATN3	13	Simple mode	-0.116954	0.0660737979609874	0.889626334977029	0.781563876449465	1.01262998423115	0.102097985637647
ALDH5A1_P51649_OID31047_v1_Neurology_II	19361_78_MATN3_MATN3	13	Weighted mode	-0.134415	0.0461325119835194	0.874226754642171	0.79864781246279	0.956958006527805	0.0129918976231938
ALDH5A1_P51649_OID31047_v1_Neurology_II	3054_3_HP_Haptoglobin__Mixed_Type	13	MR Egger	-0.106615	0.0632838831364651	0.898871620320577	0.794016157525866	1.01757399035223	0.120171369835969
ALDH5A1_P51649_OID31047_v1_Neurology_II	3054_3_HP_Haptoglobin__Mixed_Type	13	Weighted median	-0.0492792	0.0428025491320497	0.951915286693875	0.875314324602626	1.03521979199055	0.249602515966185
ALDH5A1_P51649_OID31047_v1_Neurology_II	3054_3_HP_Haptoglobin__Mixed_Type	13	Inverse variance weighted	-0.0718087	0.029526414316979	0.930708897770287	0.878376027586334	0.986159714272991	0.0150150222626435
ALDH5A1_P51649_OID31047_v1_Neurology_II	3054_3_HP_Haptoglobin__Mixed_Type	13	Simple mode	-0.0307516	0.0697161002513525	0.969716450301119	0.84586532192714	1.11170179177247	0.6669850536292
ALDH5A1_P51649_OID31047_v1_Neurology_II	3054_3_HP_Haptoglobin__Mixed_Type	13	Weighted mode	-0.0348715	0.0534562450645742	0.965729491615737	0.86966625689591	1.07240386019486	0.526482332363302
ALDH5A1_P51649_OID31047_v1_Neurology_II	3181_50_CTSS_Cathepsin_S	13	MR Egger	-0.144206	0.103210833630046	0.865709686815284	0.70715960058317	1.05980780184243	0.189900000846633
ALDH5A1_P51649_OID31047_v1_Neurology_II	3181_50_CTSS_Cathepsin_S	13	Weighted median	-0.16819	0.0443159711969282	0.845193542995298	0.774878577239746	0.921889114118489	0.000147502225077168
ALDH5A1_P51649_OID31047_v1_Neurology_II	3181_50_CTSS_Cathepsin_S	13	Inverse variance weighted	-0.13649	0.0461986476774477	0.872415092621463	0.796889468591923	0.95509869791424	0.00313263160380115
ALDH5A1_P51649_OID31047_v1_Neurology_II	3181_50_CTSS_Cathepsin_S	13	Simple mode	-0.180533	0.0805141960275456	0.834825538762506	0.712952603316644	0.977531573526745	0.0446163500467735
ALDH5A1_P51649_OID31047_v1_Neurology_II	3181_50_CTSS_Cathepsin_S	13	Weighted mode	-0.174461	0.0442904259832339	0.839909780372165	0.770072947076201	0.916080017929798	0.00196638576133609
ALDH5A1_P51649_OID31047_v1_Neurology_II	7905_30_HP_HPT	13	MR Egger	-0.128629	0.0641806069652537	0.879300514320385	0.77536410478608	0.997169445569586	0.070300325685845
ALDH5A1_P51649_OID31047_v1_Neurology_II	7905_30_HP_HPT	13	Weighted median	-0.0467582	0.0437601675171322	0.954318100081858	0.875878274978752	1.03978265263623	0.285290024610829
ALDH5A1_P51649_OID31047_v1_Neurology_II	7905_30_HP_HPT	13	Inverse variance weighted	-0.0796698	0.0300957039866273	0.923421246303936	0.870526271705458	0.979530228829243	0.00811580445168619
ALDH5A1_P51649_OID31047_v1_Neurology_II	7905_30_HP_HPT	13	Simple mode	-0.00929248	0.0758582960063084	0.990750565650481	0.853871353771634	1.14957209771821	0.904532387347629
ALDH5A1_P51649_OID31047_v1_Neurology_II	7905_30_HP_HPT	13	Weighted mode	-0.0463979	0.0556511021415964	0.954662046582998	0.856009299282121	1.06468425512474	0.420720483893588
ALDH5A1_P51649_OID31047_v1_Neurology_II	8099_42_SPON2_SPON2	13	MR Egger	-0.184128	0.0804456787920979	0.831829486268259	0.710489340774193	0.973892575884862	0.0428645237773766
ALDH5A1_P51649_OID31047_v1_Neurology_II	8099_42_SPON2_SPON2	13	Weighted median	-0.149078	0.0433026353002135	0.861502102079713	0.791400634582878	0.937813086640935	0.000575947637947759
ALDH5A1_P51649_OID31047_v1_Neurology_II	8099_42_SPON2_SPON2	13	Inverse variance weighted	-0.108198	0.0378833027161954	0.89745025468321	0.833227254066916	0.966623397998304	0.00428912630447851
ALDH5A1_P51649_OID31047_v1_Neurology_II	8099_42_SPON2_SPON2	13	Simple mode	-0.0968412	0.0668154582273456	0.90770018264931	0.796283939878443	1.03470581323964	0.172857184928562
ALDH5A1_P51649_OID31047_v1_Neurology_II	8099_42_SPON2_SPON2	13	Weighted mode	-0.142613	0.0406677080186757	0.867089927440066	0.800658077361602	0.939033731784189	0.00432751478288114
BTN2A1_Q7KYR7_OID20713_v1_Inflammation	10816_150_PILRA_PILRA_isoform_FDF03_M14	143	MR Egger	0.0109791394468478	0.0157951829116926	1.01103963137877	0.980218846924366	1.04282950631471	0.488140203218179
BTN2A1_Q7KYR7_OID20713_v1_Inflammation	10816_150_PILRA_PILRA_isoform_FDF03_M14	143	Weighted median	0.0416744086297101	0.00982125322016343	1.04255497658085	1.02267807711452	1.06281820596001	2.20268186811976e-05
BTN2A1_Q7KYR7_OID20713_v1_Inflammation	10816_150_PILRA_PILRA_isoform_FDF03_M14	143	Inverse variance weighted	0.050756100393793	0.00696877022865656	1.05206626344116	1.03779400443306	1.06653480164949	3.25593617766697e-13
BTN2A1_Q7KYR7_OID20713_v1_Inflammation	10816_150_PILRA_PILRA_isoform_FDF03_M14	143	Simple mode	0.0262050537874505	0.0223849530169549	1.02655142515092	0.982485735297017	1.07259351522373	0.243698370775858
BTN2A1_Q7KYR7_OID20713_v1_Inflammation	10816_150_PILRA_PILRA_isoform_FDF03_M14	143	Weighted mode	0.0262050537874505	0.0147244962559433	1.02655142515092	0.997348562412134	1.05660936225818	0.0772654664410127
BTN2A1_Q7KYR7_OID20713_v1_Inflammation	10851_77_EBI3_IL27B	143	MR Egger	0.0509156235224502	0.021665798072674	1.05223410573007	1.00848646691623	1.09787949524713	0.020157666295996
BTN2A1_Q7KYR7_OID20713_v1_Inflammation	10851_77_EBI3_IL27B	143	Weighted median	0.0478061099772761	0.0125405141814544	1.04896725132191	1.02349854260092	1.07506972266875	0.00013777261440102
BTN2A1_Q7KYR7_OID20713_v1_Inflammation	10851_77_EBI3_IL27B	143	Inverse variance weighted	0.0340762973272988	0.00943144819519552	1.03466354577986	1.01571282725615	1.05396783838763	0.000302615897335394
BTN2A1_Q7KYR7_OID20713_v1_Inflammation	10851_77_EBI3_IL27B	143	Simple mode	0.0282350968979198	0.0326188075262517	1.02863748547889	0.964931884781075	1.09654898259725	0.388165323860276
BTN2A1_Q7KYR7_OID20713_v1_Inflammation	10851_77_EBI3_IL27B	143	Weighted mode	0.05821459064701	0.0211371342738651	1.05994242503809	1.01692748072637	1.10477685546777	0.00665514401876356
BTN2A1_Q7KYR7_OID20713_v1_Inflammation	10916_44_PLA2R1_PLA2R	143	MR Egger	0.0252031183441818	0.018173451841262	1.02552340198615	0.989637220188453	1.06271	0.167688381471254
BTN2A1_Q7KYR7_OID20713_v1_Inflammation	10916_44_PLA2R1_PLA2R	143	Weighted median	0.0118533054623734	0.0104844150686357	1.01192383427862	0.991341554056576	1.0329334447759	0.258238517385295
BTN2A1_Q7KYR7_OID20713_v1_Inflammation	10916_44_PLA2R1_PLA2R	143	Inverse variance weighted	0.0162619416567168	0.00789150325670236	1.01639488670047	1.00079491104804	1.03223802829796	0.0393326265590471
BTN2A1_Q7KYR7_OID20713_v1_Inflammation	10916_44_PLA2R1_PLA2R	143	Simple mode	0.0320991634954098	0.024073813311078	1.03261989842676	0.985027705697149	1.08251153592906	0.184547311116749
BTN2A1_Q7KYR7_OID20713_v1_Inflammation	10916_44_PLA2R1_PLA2R	143	Weighted mode	0.0138508581283905	0.0146545424766702	1.01394722567422	0.985237997541977	1.04349302302324	0.346183684651359
BTN2A1_Q7KYR7_OID20713_v1_Inflammation	11275_94_LRP1B_LRP1B	143	MR Egger	-0.026963	0.0191480867349015	0.973397251532166	0.937542437812488	1.01062327535927	0.161293478191069
BTN2A1_Q7KYR7_OID20713_v1_Inflammation	11275_94_LRP1B_LRP1B	143	Weighted median	-0.032242	0.0119084215501734	0.968272251990607	0.945933994678693	0.991138027863583	0.00677933082592605
BTN2A1_Q7KYR7_OID20713_v1_Inflammation	11275_94_LRP1B_LRP1B	143	Inverse variance weighted	-0.0342745	0.00830143655507408	0.966306179575728	0.950710808628832	0.982157375525099	3.64744016623514e-05
BTN2A1_Q7KYR7_OID20713_v1_Inflammation	11275_94_LRP1B_LRP1B	143	Simple mode	-0.0167943	0.0256298601165153	0.983345931494177	0.935168237674476	1.0340056281111	0.513358378656708
BTN2A1_Q7KYR7_OID20713_v1_Inflammation	11275_94_LRP1B_LRP1B	143	Weighted mode	-0.0335785	0.0168903729795319	0.966979035263963	0.935491148604877	0.999526779098325	0.0487318201887638
BTN2A1_Q7KYR7_OID20713_v1_Inflammation	11308_8_CREB3L4_CR3L4	143	MR Egger	0.0319199064603162	0.0831650151027187	1.03243481063503	0.877144509466875	1.2152178195345	0.70169437427005
BTN2A1_Q7KYR7_OID20713_v1_Inflammation	11308_8_CREB3L4_CR3L4	143	Weighted median	0.00607875384396683	0.0186814568884328	1.00609726696133	0.969924639580097	1.0436189259253	0.744886142204278
BTN2A1_Q7KYR7_OID20713_v1_Inflammation	11308_8_CREB3L4_CR3L4	143	Inverse variance weighted	0.0762226288815708	0.0363980377938151	1.07920280912905	1.00489441350804	1.15900604837299	0.0362474079395659
BTN2A1_Q7KYR7_OID20713_v1_Inflammation	11308_8_CREB3L4_CR3L4	143	Simple mode	0.0360356074018329	0.0425590252662124	1.0366927597694	0.953724834935839	1.12687836028785	0.398575541593147
BTN2A1_Q7KYR7_OID20713_v1_Inflammation	11308_8_CREB3L4_CR3L4	143	Weighted mode	0.0129031439835476	0.0176508976042351	1.01298674874699	0.978540977331504	1.04864505105888	0.465971980519432
BTN2A1_Q7KYR7_OID20713_v1_Inflammation	11327_56_CLK2_CLK2	143	MR Egger	-0.000557294	0.0367859018643277	0.999442861530215	0.929919122766984	1.07416441818242	0.987934201719908
BTN2A1_Q7KYR7_OID20713_v1_Inflammation	11327_56_CLK2_CLK2	143	Weighted median	0.0165852911703078	0.0142726708214035	1.01672359063296	0.988675467137016	1.04556742238485	0.245222724364566
BTN2A1_Q7KYR7_OID20713_v1_Inflammation	11327_56_CLK2_CLK2	143	Inverse variance weighted	0.057278645833305	0.0161379020085432	1.05895084152866	1.02598010723068	1.09298111812428	0.000386221283611271
BTN2A1_Q7KYR7_OID20713_v1_Inflammation	11327_56_CLK2_CLK2	143	Simple mode	0.0138166405640314	0.0251532841618491	1.01391253146334	0.965138372826007	1.06515153723324	0.583663964507357
BTN2A1_Q7KYR7_OID20713_v1_Inflammation	11327_56_CLK2_CLK2	143	Weighted mode	0.0138166405640314	0.0153558662707876	1.01391253146334	0.98385095949779	1.04489263494052	0.369769696401392
BTN2A1_Q7KYR7_OID20713_v1_Inflammation	11358_15_GRB10_GRB10	143	MR Egger	-0.0182287	0.020777164068992	0.981936478865519	0.94275211466188	1.02274949430649	0.381793862643865
BTN2A1_Q7KYR7_OID20713_v1_Inflammation	11358_15_GRB10_GRB10	143	Weighted median	-0.0245621	0.0133841578351163	0.975737111294658	0.950473467793942	1.00167226400058	0.0664818648696431
BTN2A1_Q7KYR7_OID20713_v1_Inflammation	11358_15_GRB10_GRB10	143	Inverse variance weighted	-0.0247828	0.00906116375990501	0.975521743973671	0.958349533484454	0.993001655153276	0.00623688534739151
BTN2A1_Q7KYR7_OID20713_v1_Inflammation	11358_15_GRB10_GRB10	143	Simple mode	-0.0229506	0.0311115587552305	0.977310789106561	0.919496329167618	1.0387604041538	0.461922348019335
BTN2A1_Q7KYR7_OID20713_v1_Inflammation	11358_15_GRB10_GRB10	143	Weighted mode	-0.0229506	0.0199218397260183	0.977310789106561	0.939885351305084	1.01622647610991	0.251244289843228
BTN2A1_Q7KYR7_OID20713_v1_Inflammation	11441_11_PYGL_PYGL	143	MR Egger	-0.0199449	0.0192609601499681	0.980252672877192	0.943936489683787	1.01796605299661	0.302203625980246
BTN2A1_Q7KYR7_OID20713_v1_Inflammation	11441_11_PYGL_PYGL	143	Weighted median	-0.0391876	0.0121046772372638	0.961570256578119	0.939025339754669	0.984656450886912	0.00120625437002028
BTN2A1_Q7KYR7_OID20713_v1_Inflammation	11441_11_PYGL_PYGL	143	Inverse variance weighted	-0.032947	0.00839168353714291	0.967589858818803	0.951805396248624	0.983636086303965	8.63175044390361e-05
BTN2A1_Q7KYR7_OID20713_v1_Inflammation	11441_11_PYGL_PYGL	143	Simple mode	-0.0106219	0.0271425011568949	0.989434349155515	0.938172761809771	1.04349686021614	0.696134780288879
BTN2A1_Q7KYR7_OID20713_v1_Inflammation	11441_11_PYGL_PYGL	143	Weighted mode	-0.0354778	0.0175616169135894	0.965144189021415	0.932488426052999	0.998943557449431	0.0452444714777547
BTN2A1_Q7KYR7_OID20713_v1_Inflammation	12560_9_NT5C_NT5C	143	MR Egger	-0.0297218	0.0201197197500337	0.970715561843201	0.933180684173518	1.00976018683789	0.141839666045393
BTN2A1_Q7KYR7_OID20713_v1_Inflammation	12560_9_NT5C_NT5C	143	Weighted median	-0.0339226	0.0134911325347699	0.966646286003819	0.941420612088915	0.992547890120685	0.0119221786316407
BTN2A1_Q7KYR7_OID20713_v1_Inflammation	12560_9_NT5C_NT5C	143	Inverse variance weighted	-0.046239	0.00872957107798569	0.954813774699522	0.938615917362315	0.971291161264247	1.17837402094496e-07
BTN2A1_Q7KYR7_OID20713_v1_Inflammation	12560_9_NT5C_NT5C	143	Simple mode	-0.0827652	0.0322835077974997	0.920567266561382	0.864122377010427	0.980699163463589	0.0113960732931806
BTN2A1_Q7KYR7_OID20713_v1_Inflammation	12560_9_NT5C_NT5C	143	Weighted mode	-0.0181576	0.0197806665337342	0.98200627655596	0.944662379732065	1.02082643268679	0.360203770600117
BTN2A1_Q7KYR7_OID20713_v1_Inflammation	12781_2_TARBP2_TRBP2	143	MR Egger	-0.0160473	0.0205194977258352	0.98408077000333	0.94528811202576	1.02446539797801	0.435495683506769
BTN2A1_Q7KYR7_OID20713_v1_Inflammation	12781_2_TARBP2_TRBP2	143	Weighted median	-0.0155115	0.0124005694155534	0.984608135626509	0.960965601755151	1.00883234422882	0.21098048200012
BTN2A1_Q7KYR7_OID20713_v1_Inflammation	12781_2_TARBP2_TRBP2	143	Inverse variance weighted	-0.0214193	0.00895419419977504	0.978808454884562	0.961780014067585	0.996138386471171	0.0167523716673845
BTN2A1_Q7KYR7_OID20713_v1_Inflammation	12781_2_TARBP2_TRBP2	143	Simple mode	-0.0295427	0.026253852879593	0.970889389112618	0.92219343025294	1.02215671351392	0.262372060108091
BTN2A1_Q7KYR7_OID20713_v1_Inflammation	12781_2_TARBP2_TRBP2	143	Weighted mode	-0.0184397	0.0176149587929983	0.981729232156762	0.948413150517272	1.01621564899796	0.296959926424559
BTN2A1_Q7KYR7_OID20713_v1_Inflammation	13378_80_C5orf63_YD286	143	MR Egger	-0.00403342	0.0272424394219828	0.995974708060776	0.944189306400358	1.05060035352289	0.882509843390672
BTN2A1_Q7KYR7_OID20713_v1_Inflammation	13378_80_C5orf63_YD286	143	Weighted median	0.00327291071616388	0.0138366181587668	1.00327827253643	0.976435228745544	1.03085925467566	0.813013837259614
BTN2A1_Q7KYR7_OID20713_v1_Inflammation	13378_80_C5orf63_YD286	143	Inverse variance weighted	0.0367857571937165	0.0120363266420003	1.03747072638666	1.01328198926252	1.06223688915327	0.00224140824674631
BTN2A1_Q7KYR7_OID20713_v1_Inflammation	13378_80_C5orf63_YD286	143	Simple mode	0.0343376228267092	0.0251358226755529	1.03493396507987	0.98518228933542	1.08719809894113	0.174072456450813
BTN2A1_Q7KYR7_OID20713_v1_Inflammation	13378_80_C5orf63_YD286	143	Weighted mode	0.00928894129167745	0.0158319284590128	1.00933221739946	0.978493007329357	1.0411433883018	0.558322013668299
BTN2A1_Q7KYR7_OID20713_v1_Inflammation	13565_2_RBL2_p130	143	MR Egger	0.0229716661535494	0.0212234938487423	1.02323754688095	0.981546017210052	1.06669993967575	0.280935864986479
BTN2A1_Q7KYR7_OID20713_v1_Inflammation	13565_2_RBL2_p130	143	Weighted median	0.0370070197696734	0.0122594793135326	1.03770030522972	1.01306302580479	1.06293675323746	0.00253907601976239
BTN2A1_Q7KYR7_OID20713_v1_Inflammation	13565_2_RBL2_p130	143	Inverse variance weighted	0.0383709177633897	0.00926764174222401	1.03911658820731	1.02041187003848	1.05816417428277	3.46835483173043e-05
BTN2A1_Q7KYR7_OID20713_v1_Inflammation	13565_2_RBL2_p130	143	Simple mode	0.0550142576752886	0.0276542723121292	1.0565556785959	1.0008122136105	1.11540395569921	0.0485827174524984
BTN2A1_Q7KYR7_OID20713_v1_Inflammation	13565_2_RBL2_p130	143	Weighted mode	0.0478274817989259	0.0169706470954377	1.04898966990248	1.01467160015089	1.0844684402308	0.0055181001755949
BTN2A1_Q7KYR7_OID20713_v1_Inflammation	13645_14_DHX38_PRP16	143	MR Egger	-0.0100678	0.0284747422858815	0.989982745118715	0.936244835745354	1.04680506446003	0.724190562505473
BTN2A1_Q7KYR7_OID20713_v1_Inflammation	13645_14_DHX38_PRP16	143	Weighted median	-0.011546	0.0134372865343338	0.988520435079396	0.962825541205993	1.0149010477491	0.390203616550931
BTN2A1_Q7KYR7_OID20713_v1_Inflammation	13645_14_DHX38_PRP16	143	Inverse variance weighted	0.0270289396866378	0.0125129691501991	1.02739753489598	1.00250665657564	1.05290641990933	0.030766939168699
BTN2A1_Q7KYR7_OID20713_v1_Inflammation	13645_14_DHX38_PRP16	143	Simple mode	0.00756253905619286	0.0270868098113323	1.00759120727729	0.955493222784639	1.06252981891777	0.780500350063547
BTN2A1_Q7KYR7_OID20713_v1_Inflammation	13645_14_DHX38_PRP16	143	Weighted mode	-0.00170086	0.0169022794035389	0.998300588615435	0.96577023536185	1.03192667234823	0.919987029307094
BTN2A1_Q7KYR7_OID20713_v1_Inflammation	13672_3_HSPA6_HSP76	143	MR Egger	-0.0148049	0.0287682323254505	0.985304141211592	0.931284327684378	1.04245741266005	0.607619345870075
BTN2A1_Q7KYR7_OID20713_v1_Inflammation	13672_3_HSPA6_HSP76	143	Weighted median	0.00269351244966113	0.0128623910046407	1.00269714321342	0.977734836610408	1.02829675630038	0.834128238573823
BTN2A1_Q7KYR7_OID20713_v1_Inflammation	13672_3_HSPA6_HSP76	143	Inverse variance weighted	0.0304495637932782	0.0126533904152152	1.03091789314956	1.00566490380559	1.05680500372854	0.0161090626430846
BTN2A1_Q7KYR7_OID20713_v1_Inflammation	13672_3_HSPA6_HSP76	143	Simple mode	0.0104704442493664	0.0259752161770076	1.01052545116541	0.96036584415182	1.0633048787308	0.687485608613539
BTN2A1_Q7KYR7_OID20713_v1_Inflammation	13672_3_HSPA6_HSP76	143	Weighted mode	-0.00858616	0.0161637365552872	0.991450600295005	0.960532866624204	1.02336351725266	0.596111022175145
BTN2A1_Q7KYR7_OID20713_v1_Inflammation	15305_7_SCGN_Secretagogin	143	MR Egger	0.0444647186931275	0.0221477473642616	1.04546809057923	1.00105569070874	1.09185087159892	0.0465922623162584
BTN2A1_Q7KYR7_OID20713_v1_Inflammation	15305_7_SCGN_Secretagogin	143	Weighted median	0.0230214664283637	0.0122011810480933	1.02328850566085	0.999107550044657	1.04805470218979	0.0591841651639056
BTN2A1_Q7KYR7_OID20713_v1_Inflammation	15305_7_SCGN_Secretagogin	143	Inverse variance weighted	0.030482184150469	0.00965920666215788	1.03095152260797	1.01161709950152	1.05065547279837	0.00160077900118968
BTN2A1_Q7KYR7_OID20713_v1_Inflammation	15305_7_SCGN_Secretagogin	143	Simple mode	0.0127482887211064	0.0251160130189814	1.01282989456333	0.964178248100198	1.06393646334838	0.612538083694646
BTN2A1_Q7KYR7_OID20713_v1_Inflammation	15305_7_SCGN_Secretagogin	143	Weighted mode	0.0227470036640758	0.0165174655435002	1.02300768960746	0.990418964608984	1.05666871333504	0.170633355931364
BTN2A1_Q7KYR7_OID20713_v1_Inflammation	15447_45_SORD_Sorbitol_dehydrogenase	143	MR Egger	-0.0142556	0.018563319431115	0.985845518248441	0.950621100567851	1.02237514533391	0.443803933177568
BTN2A1_Q7KYR7_OID20713_v1_Inflammation	15447_45_SORD_Sorbitol_dehydrogenase	143	Weighted median	-0.0284869	0.0126116420459228	0.97191504521544	0.94818495192077	0.996239028264039	0.0238972925009131
BTN2A1_Q7KYR7_OID20713_v1_Inflammation	15447_45_SORD_Sorbitol_dehydrogenase	143	Inverse variance weighted	-0.0266893	0.00811874322649979	0.97366375294325	0.958292719932643	0.989281337608586	0.00101130306963261
BTN2A1_Q7KYR7_OID20713_v1_Inflammation	15447_45_SORD_Sorbitol_dehydrogenase	143	Simple mode	-0.0191889	0.0254204104268329	0.980994074495272	0.933314673708983	1.03110922961328	0.451582916911253
BTN2A1_Q7KYR7_OID20713_v1_Inflammation	15447_45_SORD_Sorbitol_dehydrogenase	143	Weighted mode	-0.0264064	0.0175388375970729	0.973939173093495	0.941027844408179	1.00800153632287	0.134391764738544
BTN2A1_Q7KYR7_OID20713_v1_Inflammation	15585_304_FBLN5_fibulin_5	143	MR Egger	0.0502680540085619	0.0240972815808768	1.05155293157933	1.00304199962896	1.10241003698961	0.0387758974063283
BTN2A1_Q7KYR7_OID20713_v1_Inflammation	15585_304_FBLN5_fibulin_5	143	Weighted median	0.0902305073635568	0.0139763539365445	1.09442652800559	1.06485309816062	1.12482128029804	1.07548965896572e-10
BTN2A1_Q7KYR7_OID20713_v1_Inflammation	15585_304_FBLN5_fibulin_5	143	Inverse variance weighted	0.0898604375879407	0.0106096767818639	1.09402158875845	1.07150635954709	1.11700992346463	2.46093909475996e-17
BTN2A1_Q7KYR7_OID20713_v1_Inflammation	15585_304_FBLN5_fibulin_5	143	Simple mode	0.0791301407391158	0.0291324963341274	1.0823451701055	1.02227491014558	1.14594523999799	0.00742411206960853
BTN2A1_Q7KYR7_OID20713_v1_Inflammation	15585_304_FBLN5_fibulin_5	143	Weighted mode	0.0886996153924235	0.0180398924356669	1.09275236103223	1.05478971651119	1.13208130857695	2.39678561966649e-06
BTN2A1_Q7KYR7_OID20713_v1_Inflammation	16845_15_MPZL1_MPZL1	143	MR Egger	-0.0298203	0.0249558687978375	0.970619935996848	0.92428593181248	1.01927664127388	0.234123767147641
BTN2A1_Q7KYR7_OID20713_v1_Inflammation	16845_15_MPZL1_MPZL1	143	Weighted median	-0.0303998	0.0129024730343051	0.970057660111479	0.945833610345114	0.994902119832265	0.0184669854158536
BTN2A1_Q7KYR7_OID20713_v1_Inflammation	16845_15_MPZL1_MPZL1	143	Inverse variance weighted	-0.0225198	0.0108743950276015	0.977731901783631	0.957113217587739	0.998794765550088	0.0383682202247377
BTN2A1_Q7KYR7_OID20713_v1_Inflammation	16845_15_MPZL1_MPZL1	143	Simple mode	-0.00765869	0.028411740171667	0.992370566567794	0.938618939676413	1.04920037276213	0.787889610102543
BTN2A1_Q7KYR7_OID20713_v1_Inflammation	16845_15_MPZL1_MPZL1	143	Weighted mode	-0.0291864	0.0167021674028524	0.971235373631946	0.939955556789614	1.00355611941461	0.0827186100397724
BTN2A1_Q7KYR7_OID20713_v1_Inflammation	16900_29_MDGA1_MDGA1	143	MR Egger	-0.0810282	0.0570958148912452	0.922167658633128	0.824534720569557	1.03136128705591	0.158058558576116
BTN2A1_Q7KYR7_OID20713_v1_Inflammation	16900_29_MDGA1_MDGA1	143	Weighted median	-0.0710315	0.0200427370432926	0.931432593393877	0.895551795257915	0.968750976359316	0.000394105619581027
BTN2A1_Q7KYR7_OID20713_v1_Inflammation	16900_29_MDGA1_MDGA1	143	Inverse variance weighted	-0.0813084	0.0252914370855964	0.92190928692602	0.877323341414058	0.96876110916023	0.00130507829640343
BTN2A1_Q7KYR7_OID20713_v1_Inflammation	16900_29_MDGA1_MDGA1	143	Simple mode	-0.133931	0.0641451393296078	0.87465054810493	0.771317398384403	0.991827207453957	0.0385897750377812
BTN2A1_Q7KYR7_OID20713_v1_Inflammation	16900_29_MDGA1_MDGA1	143	Weighted mode	-0.0688699	0.0280058073501175	0.933448123300207	0.88359075337819	0.986118738297545	0.0151293098580266
BTN2A1_Q7KYR7_OID20713_v1_Inflammation	17712_7_IDI1_IDI1	143	MR Egger	-0.0402706	0.0216842298502326	0.960529457997215	0.920561270517978	1.00223295203511	0.065377668380476
BTN2A1_Q7KYR7_OID20713_v1_Inflammation	17712_7_IDI1_IDI1	143	Weighted median	-0.0582201	0.0137447241997588	0.943442238918428	0.918365522005961	0.969203695965449	2.27722213866384e-05
BTN2A1_Q7KYR7_OID20713_v1_Inflammation	17712_7_IDI1_IDI1	143	Inverse variance weighted	-0.0451241	0.00942613535554598	0.955878864273191	0.93838092381261	0.973703087922818	1.69187755478275e-06
BTN2A1_Q7KYR7_OID20713_v1_Inflammation	17712_7_IDI1_IDI1	143	Simple mode	-0.0112325	0.0320363555762601	0.988830385888298	0.9286496663672	1.05291108958345	0.726395947961245
BTN2A1_Q7KYR7_OID20713_v1_Inflammation	17712_7_IDI1_IDI1	143	Weighted mode	-0.0591247	0.020343498644018	0.942589244527666	0.905744580801641	0.98093270744483	0.00424412107479692
BTN2A1_Q7KYR7_OID20713_v1_Inflammation	19277_4_TSTD1_KAT	143	MR Egger	-0.0272611	0.0201240328153856	0.973107167439954	0.935471904870711	1.01225654601982	0.177695109996447
BTN2A1_Q7KYR7_OID20713_v1_Inflammation	19277_4_TSTD1_KAT	143	Weighted median	-0.0458657	0.0131671196963683	0.955170238176714	0.930834997278621	0.98014168629875	0.000495179383923197
BTN2A1_Q7KYR7_OID20713_v1_Inflammation	19277_4_TSTD1_KAT	143	Inverse variance weighted	-0.0484989	0.00879401441673642	0.952658343501148	0.936378771310254	0.969220946959771	3.48789792827916e-08
BTN2A1_Q7KYR7_OID20713_v1_Inflammation	19277_4_TSTD1_KAT	143	Simple mode	-0.0444899	0.0296645854075867	0.956485249185949	0.902458566724323	1.01374629888108	0.135895293903693
BTN2A1_Q7KYR7_OID20713_v1_Inflammation	19277_4_TSTD1_KAT	143	Weighted mode	-0.0444899	0.0181503383468575	0.956485249185949	0.923056738039338	0.991124374275807	0.0154529475459801
BTN2A1_Q7KYR7_OID20713_v1_Inflammation	19361_78_MATN3_MATN3	143	MR Egger	0.0304858057978954	0.0202955057159143	1.03095525635765	0.99074966463742	1.07279243036681	0.135308470157068
BTN2A1_Q7KYR7_OID20713_v1_Inflammation	19361_78_MATN3_MATN3	143	Weighted median	0.0193179475600247	0.0121752125631614	1.01950574645614	0.995464845945963	1.04412724496502	0.112589208876689
BTN2A1_Q7KYR7_OID20713_v1_Inflammation	19361_78_MATN3_MATN3	143	Inverse variance weighted	0.0216538133971159	0.00885921765774344	1.02188995861579	1.00429896092241	1.03978907491915	0.0145168602081997
BTN2A1_Q7KYR7_OID20713_v1_Inflammation	19361_78_MATN3_MATN3	143	Simple mode	0.00828650078931581	0.0263257563650572	1.00832092886738	0.957612585869473	1.06171442459566	0.753399991355357
BTN2A1_Q7KYR7_OID20713_v1_Inflammation	19361_78_MATN3_MATN3	143	Weighted mode	0.0285406339567432	0.0174702484629185	1.02895182036883	0.994315167133608	1.06479503042527	0.104543252902453
BTN2A1_Q7KYR7_OID20713_v1_Inflammation	19553_14_STX1A_STX1a	143	MR Egger	0.0719321853145802	0.0236913857925724	1.07458246912074	1.02582489973856	1.12565749109417	0.00285430643454358
BTN2A1_Q7KYR7_OID20713_v1_Inflammation	19553_14_STX1A_STX1a	143	Weighted median	0.0523115532951904	0.0132105170582197	1.05370397632553	1.02677101368726	1.0813434104816	7.49995336562298e-05
BTN2A1_Q7KYR7_OID20713_v1_Inflammation	19553_14_STX1A_STX1a	143	Inverse variance weighted	0.0362812596383609	0.0104173218670169	1.03694745694662	1.01598979902789	1.05833742572698	0.00049623253315674
BTN2A1_Q7KYR7_OID20713_v1_Inflammation	19553_14_STX1A_STX1a	143	Simple mode	0.0359426855314003	0.0337815093200116	1.03659643281461	0.970184448240874	1.10755451344567	0.289145912311752
BTN2A1_Q7KYR7_OID20713_v1_Inflammation	19553_14_STX1A_STX1a	143	Weighted mode	0.0776236835872768	0.02029532178113	1.08071589101093	1.03857008923696	1.12457199488736	0.000195440175765127
BTN2A1_Q7KYR7_OID20713_v1_Inflammation	2516_57_CCL21_6Ckine	143	MR Egger	0.0993455695571498	0.0279168825606011	1.10444789719155	1.0456393115458	1.16656398065942	0.000508461649380105
BTN2A1_Q7KYR7_OID20713_v1_Inflammation	2516_57_CCL21_6Ckine	143	Weighted median	0.109897165306935	0.0151465110425274	1.11616328424822	1.08351458581687	1.14979576039999	3.99857942678427e-13
BTN2A1_Q7KYR7_OID20713_v1_Inflammation	2516_57_CCL21_6Ckine	143	Inverse variance weighted	0.101982260483466	0.0121560059764477	1.10736382745477	1.08129185546311	1.13406444352628	4.88402565448323e-17
BTN2A1_Q7KYR7_OID20713_v1_Inflammation	2516_57_CCL21_6Ckine	143	Simple mode	0.101051587230897	0.0395321125994869	1.10633371298404	1.02384858199276	1.19546415945879	0.011633654158239
BTN2A1_Q7KYR7_OID20713_v1_Inflammation	2516_57_CCL21_6Ckine	143	Weighted mode	0.115755627726116	0.0237411916704635	1.12272147660711	1.07167505038052	1.17619936527149	2.86632098465996e-06
BTN2A1_Q7KYR7_OID20713_v1_Inflammation	3181_50_CTSS_Cathepsin_S	143	MR Egger	0.046896507125782	0.0237810150831116	1.04801354153331	1.00028575838403	1.09801861521207	0.0505647808388461
BTN2A1_Q7KYR7_OID20713_v1_Inflammation	3181_50_CTSS_Cathepsin_S	143	Weighted median	0.0500510722414533	0.0129180080093165	1.05132478851837	1.02504014383773	1.07828343855396	0.000106835346240583
BTN2A1_Q7KYR7_OID20713_v1_Inflammation	3181_50_CTSS_Cathepsin_S	143	Inverse variance weighted	0.0473674973970334	0.0103174012214026	1.04850726197515	1.02751718365793	1.06992612473975	4.41064158839981e-06
BTN2A1_Q7KYR7_OID20713_v1_Inflammation	3181_50_CTSS_Cathepsin_S	143	Simple mode	0.0260183692814175	0.0297207416928107	1.02635980179232	0.968279702638576	1.08792370620245	0.382819449152979
BTN2A1_Q7KYR7_OID20713_v1_Inflammation	3181_50_CTSS_Cathepsin_S	143	Weighted mode	0.037768987019942	0.0197864704019575	1.03849130019576	0.998988017432187	1.07955667311644	0.0583017616555704
BTN2A1_Q7KYR7_OID20713_v1_Inflammation	3432_21_EPHA3_EPHA3	143	MR Egger	-0.0477277	0.0243488594892883	0.953393324183374	0.908962442581677	0.99999602625578	0.0519483056224774
BTN2A1_Q7KYR7_OID20713_v1_Inflammation	3432_21_EPHA3_EPHA3	143	Weighted median	-0.0522418	0.0132114359334354	0.949099342454345	0.92483843731684	0.973996673906265	7.67633362769171e-05
BTN2A1_Q7KYR7_OID20713_v1_Inflammation	3432_21_EPHA3_EPHA3	143	Inverse variance weighted	-0.0389218	0.0105535991956692	0.96182592169656	0.942134857625025	0.981928538319336	0.000226013095647889
BTN2A1_Q7KYR7_OID20713_v1_Inflammation	3432_21_EPHA3_EPHA3	143	Simple mode	-0.0519599	0.0273369896721576	0.949366920722166	0.899838104680228	1.00162189784326	0.0593654319233139
BTN2A1_Q7KYR7_OID20713_v1_Inflammation	3432_21_EPHA3_EPHA3	143	Weighted mode	-0.0519599	0.0168974713632301	0.949366920722166	0.918439761863545	0.981335507875579	0.00252528797375041
BTN2A1_Q7KYR7_OID20713_v1_Inflammation	4931_59_F3_TF	143	MR Egger	-0.0864091	0.0302206764698515	0.917218952170987	0.864467480576385	0.973189420220541	0.00489130975345462
BTN2A1_Q7KYR7_OID20713_v1_Inflammation	4931_59_F3_TF	143	Weighted median	-0.0663418	0.0132249868395636	0.935810952155048	0.911865505973624	0.960385202024155	5.26492161345426e-07
BTN2A1_Q7KYR7_OID20713_v1_Inflammation	4931_59_F3_TF	143	Inverse variance weighted	-0.0290416	0.0133405233811661	0.971376010377022	0.946306211854335	0.9971099647407	0.029484337797366
BTN2A1_Q7KYR7_OID20713_v1_Inflammation	4931_59_F3_TF	143	Simple mode	-0.0683269	0.0281423283290302	0.933955142570042	0.883834162735816	0.986918411971087	0.0164378801281492
BTN2A1_Q7KYR7_OID20713_v1_Inflammation	4931_59_F3_TF	143	Weighted mode	-0.0804776	0.0169418158290357	0.9226755780809	0.892540354111658	0.953828270581949	4.91785129061587e-06
BTN2A1_Q7KYR7_OID20713_v1_Inflammation	5005_4_MAPK12_MK12	143	MR Egger	-0.0447672	0.0207788668157479	0.956220058833411	0.918058849401648	0.995967525950337	0.0329032993688556
BTN2A1_Q7KYR7_OID20713_v1_Inflammation	5005_4_MAPK12_MK12	143	Weighted median	-0.0530915	0.0128048874564897	0.948293226394464	0.924789538387007	0.972394264747077	3.3805130124472e-05
BTN2A1_Q7KYR7_OID20713_v1_Inflammation	5005_4_MAPK12_MK12	143	Inverse variance weighted	-0.0428981	0.00899940544058553	0.958008979532454	0.941258977079554	0.975057053599016	1.87199505756743e-06
BTN2A1_Q7KYR7_OID20713_v1_Inflammation	5005_4_MAPK12_MK12	143	Simple mode	-0.0771279	0.0293949483632582	0.925771409012245	0.873941331403229	0.980675327906058	0.0096447299492701
BTN2A1_Q7KYR7_OID20713_v1_Inflammation	5005_4_MAPK12_MK12	143	Weighted mode	-0.0497205	0.0186748513186648	0.951495366630869	0.917297739851024	0.986967909532892	0.00865309412414957
BTN2A1_Q7KYR7_OID20713_v1_Inflammation	5315_22_TNNT2_Troponin_T	143	MR Egger	0.0516253965333996	0.0270692086226439	1.05298121820829	0.998570769956483	1.11035640062619	0.0585332556442692
BTN2A1_Q7KYR7_OID20713_v1_Inflammation	5315_22_TNNT2_Troponin_T	143	Weighted median	0.0660268895561545	0.0135288949844356	1.06825544169448	1.04030116752097	1.0969608843459	1.05852218874854e-06
BTN2A1_Q7KYR7_OID20713_v1_Inflammation	5315_22_TNNT2_Troponin_T	143	Inverse variance weighted	0.0902976742436286	0.011868877687241	1.09450003968969	1.06933255554383	1.12025985804902	2.78505431022344e-14
BTN2A1_Q7KYR7_OID20713_v1_Inflammation	5315_22_TNNT2_Troponin_T	143	Simple mode	0.0392517934648762	0.0329194383531786	1.04003232402638	0.975046315820057	1.10934959444462	0.235109182211113
BTN2A1_Q7KYR7_OID20713_v1_Inflammation	5315_22_TNNT2_Troponin_T	143	Weighted mode	0.0513622396738105	0.0183917787998332	1.05270415543478	1.01543221884343	1.0913441767013	0.00594855716778659
BTN2A1_Q7KYR7_OID20713_v1_Inflammation	5337_64_CD86_B7_2	143	MR Egger	0.0169842751332765	0.0208101326552908	1.01712932797636	0.97647748587469	1.05947355140804	0.415788680703283
BTN2A1_Q7KYR7_OID20713_v1_Inflammation	5337_64_CD86_B7_2	143	Weighted median	0.0432347583696889	0.0134028684251534	1.0441829967776	1.01710986144966	1.07197675697044	0.00125628133333554
BTN2A1_Q7KYR7_OID20713_v1_Inflammation	5337_64_CD86_B7_2	143	Inverse variance weighted	0.0330026345600038	0.00909917318794923	1.03355326219581	1.01528387694734	1.05215139336936	0.000286741418003821
BTN2A1_Q7KYR7_OID20713_v1_Inflammation	5337_64_CD86_B7_2	143	Simple mode	0.0131969077038283	0.0300979268425899	1.0132843712161	0.955237738248478	1.07485830577993	0.661715090820366
BTN2A1_Q7KYR7_OID20713_v1_Inflammation	5337_64_CD86_B7_2	143	Weighted mode	0.0402087865262163	0.0210734627844268	1.04102810414537	0.998905398981959	1.08492707590229	0.0584058995016305
BTN2A1_Q7KYR7_OID20713_v1_Inflammation	5491_12_SPOCK2_Testican_2	143	MR Egger	-0.053092	0.0363003791302891	0.948292734542604	0.883167170019003	1.01822071847048	0.145809075677238
BTN2A1_Q7KYR7_OID20713_v1_Inflammation	5491_12_SPOCK2_Testican_2	143	Weighted median	-0.05103	0.0162131839007661	0.950250169926509	0.920528025577179	0.980931987246327	0.00164707991025629
BTN2A1_Q7KYR7_OID20713_v1_Inflammation	5491_12_SPOCK2_Testican_2	143	Inverse variance weighted	-0.0628412	0.015722127092107	0.939092556539813	0.910595402951674	0.968481530754318	6.41521381095234e-05
BTN2A1_Q7KYR7_OID20713_v1_Inflammation	5491_12_SPOCK2_Testican_2	143	Simple mode	-0.0127054	0.0367146670187824	0.987374958556823	0.918818970052782	1.06104612612546	0.729811113119507
BTN2A1_Q7KYR7_OID20713_v1_Inflammation	5491_12_SPOCK2_Testican_2	143	Weighted mode	-0.0496091	0.0217377054051901	0.951601335935968	0.911909068688129	0.993021271142566	0.0239655457818894
BTN2A1_Q7KYR7_OID20713_v1_Inflammation	5708_1_LEAP2_LEAP2	143	MR Egger	-0.0262409	0.0215497770679226	0.974100375939937	0.933813547783105	1.0161252689672	0.225376078016709
BTN2A1_Q7KYR7_OID20713_v1_Inflammation	5708_1_LEAP2_LEAP2	143	Weighted median	0.00101249207587003	0.0129728940901747	1.00101300481901	0.975881239960665	1.02679198532105	0.937790874206055
BTN2A1_Q7KYR7_OID20713_v1_Inflammation	5708_1_LEAP2_LEAP2	143	Inverse variance weighted	0.0203614140657752	0.00927709165705338	1.02057012177841	1.00218068866844	1.0392969902969	0.0281775352140569
BTN2A1_Q7KYR7_OID20713_v1_Inflammation	5708_1_LEAP2_LEAP2	143	Simple mode	0.00139971221949553	0.0283669812287558	1.00140069227386	0.947243045405603	1.0586547468999	0.960715280677076
BTN2A1_Q7KYR7_OID20713_v1_Inflammation	5708_1_LEAP2_LEAP2	143	Weighted mode	-0.00627454	0.0183195769926844	0.993745107894902	0.958696330194268	1.03007522649528	0.732477774546463
BTN2A1_Q7KYR7_OID20713_v1_Inflammation	6402_8_PILRA_PILRA_isoform_FDF03_deltaTM	143	MR Egger	0.0068812138271873	0.0172593166783792	1.00690494377812	0.973412785420752	1.04154946492364	0.690720631751077
BTN2A1_Q7KYR7_OID20713_v1_Inflammation	6402_8_PILRA_PILRA_isoform_FDF03_deltaTM	143	Weighted median	0.0466926424824132	0.00989737056984349	1.04779991040308	1.0276696838281	1.06832445241651	2.38547503995054e-06
BTN2A1_Q7KYR7_OID20713_v1_Inflammation	6402_8_PILRA_PILRA_isoform_FDF03_deltaTM	143	Inverse variance weighted	0.0613591707289471	0.00782182046660448	1.06328074493211	1.04710415103003	1.07970724920845	4.34283512620597e-15
BTN2A1_Q7KYR7_OID20713_v1_Inflammation	6402_8_PILRA_PILRA_isoform_FDF03_deltaTM	143	Simple mode	0.0374388948322124	0.0229043394955846	1.03814855890176	0.992574098688761	1.08581558976158	0.104352858091999
BTN2A1_Q7KYR7_OID20713_v1_Inflammation	6402_8_PILRA_PILRA_isoform_FDF03_deltaTM	143	Weighted mode	0.0348602510184425	0.0145830111747134	1.03547499211228	1.00629729422279	1.0655	0.0181383605770866
BTN2A1_Q7KYR7_OID20713_v1_Inflammation	6600_70_RELL2_RELL2	143	MR Egger	-0.0262872	0.0239607020714908	0.974055303343798	0.929368297715395	1.02089100338855	0.274469411831763
BTN2A1_Q7KYR7_OID20713_v1_Inflammation	6600_70_RELL2_RELL2	143	Weighted median	-0.0145954	0.0135522026057791	0.985510599334074	0.959677763135054	1.0120388100137	0.281490980979696
BTN2A1_Q7KYR7_OID20713_v1_Inflammation	6600_70_RELL2_RELL2	143	Inverse variance weighted	0.0211352523236475	0.010589154679978	1.0213601836341	1.00038058155368	1.04277976197112	0.045941123027605
BTN2A1_Q7KYR7_OID20713_v1_Inflammation	6600_70_RELL2_RELL2	143	Simple mode	-0.0218236	0.0289455091768868	0.978412781643439	0.92444952302697	1.03552605895533	0.452124241624743
BTN2A1_Q7KYR7_OID20713_v1_Inflammation	6600_70_RELL2_RELL2	143	Weighted mode	-0.0278642	0.0172294980671747	0.972520431651499	0.940226937003511	1.00592309447531	0.108046291169505
BTN2A1_Q7KYR7_OID20713_v1_Inflammation	6986_17_HS3ST3B1_HS3SB	143	MR Egger	-0.0203289	0.0296798896356796	0.97987631148807	0.924500662329352	1.03856884579863	0.494506530130904
BTN2A1_Q7KYR7_OID20713_v1_Inflammation	6986_17_HS3ST3B1_HS3SB	143	Weighted median	-0.0117834	0.0143923316457788	0.988285739436971	0.960796757401243	1.01656119803763	0.412941293142856
BTN2A1_Q7KYR7_OID20713_v1_Inflammation	6986_17_HS3ST3B1_HS3SB	143	Inverse variance weighted	0.0345877409776269	0.0130974741822303	1.0351928532245	1.00895656369583	1.06211137518318	0.00827118124585132
BTN2A1_Q7KYR7_OID20713_v1_Inflammation	6986_17_HS3ST3B1_HS3SB	143	Simple mode	0.0609816671596778	0.0336465293324778	1.06287942840974	0.99504677753364	1.13533625236872	0.0720337655737578
BTN2A1_Q7KYR7_OID20713_v1_Inflammation	6986_17_HS3ST3B1_HS3SB	143	Weighted mode	-0.0210514	0.0184574516710466	0.979168618786757	0.944378706806284	1.01524015430119	0.255982422343494
BTN2A1_Q7KYR7_OID20713_v1_Inflammation	7738_299_STX2_STX2	143	MR Egger	-0.000844316	0.0260328703567269	0.999156040590998	0.94945348236898	1.05146045802959	0.974172866820109
BTN2A1_Q7KYR7_OID20713_v1_Inflammation	7738_299_STX2_STX2	143	Weighted median	0.0011784377032452	0.013011776733559	1.00117913233379	0.975968815223738	1.02704065886659	0.927836647003809
BTN2A1_Q7KYR7_OID20713_v1_Inflammation	7738_299_STX2_STX2	143	Inverse variance weighted	0.0304493683459246	0.011370379761834	1.0309176916594	1.00819683561434	1.05415058789462	0.00740731107905793
BTN2A1_Q7KYR7_OID20713_v1_Inflammation	7738_299_STX2_STX2	143	Simple mode	-0.00529556	0.0243229735481305	0.994718439208469	0.948409805651193	1.04328821507908	0.827961111019512
BTN2A1_Q7KYR7_OID20713_v1_Inflammation	7738_299_STX2_STX2	143	Weighted mode	-0.00529556	0.0164242643656282	0.994718439208469	0.963206827891205	1.0272609627027	0.747606620599967
BTN2A1_Q7KYR7_OID20713_v1_Inflammation	7898_29_MDM1_MDM1	143	MR Egger	-0.0558483	0.0219235657213341	0.945682584876725	0.905907125204884	0.987204456678562	0.0119247614183256
BTN2A1_Q7KYR7_OID20713_v1_Inflammation	7898_29_MDM1_MDM1	143	Weighted median	-0.0475406	0.0125621260774165	0.953571760862167	0.930379823905427	0.97734181218251	0.000154055860942326
BTN2A1_Q7KYR7_OID20713_v1_Inflammation	7898_29_MDM1_MDM1	143	Inverse variance weighted	-0.0350208	0.00957673348319983	0.965585311021398	0.947629932763907	0.983880901842067	0.00025531874801941
BTN2A1_Q7KYR7_OID20713_v1_Inflammation	7898_29_MDM1_MDM1	143	Simple mode	-0.0197449	0.0265633139735028	0.980448727619381	0.93070862354624	1.03284710506683	0.458518649455031
BTN2A1_Q7KYR7_OID20713_v1_Inflammation	7898_29_MDM1_MDM1	143	Weighted mode	-0.0448211	0.016352113996793	0.956168572110837	0.926009121225443	0.987310294614143	0.00691306850367078
BTN2A1_Q7KYR7_OID20713_v1_Inflammation	7939_1_PQLC2L_CC055	143	MR Egger	-0.0142307	0.0230786719751058	0.98587005932676	0.942268591743636	1.03148909174443	0.538481200610279
BTN2A1_Q7KYR7_OID20713_v1_Inflammation	7939_1_PQLC2L_CC055	143	Weighted median	-0.00806062	0.0135746155728365	0.991971782130224	0.965927147714842	1.01871866721061	0.552645356475508
BTN2A1_Q7KYR7_OID20713_v1_Inflammation	7939_1_PQLC2L_CC055	143	Inverse variance weighted	0.0200281345236608	0.01014355204127	1.02023004330927	1.00014678329439	1.04071658146249	0.048328377749232
BTN2A1_Q7KYR7_OID20713_v1_Inflammation	7939_1_PQLC2L_CC055	143	Simple mode	-0.00996987	0.0291959198910754	0.990079660249234	0.935013905904494	1.04838840090937	0.733245728720653
BTN2A1_Q7KYR7_OID20713_v1_Inflammation	7939_1_PQLC2L_CC055	143	Weighted mode	-0.0138908	0.0184698319078357	0.986205204677779	0.951142202437655	1.02256077297473	0.453246580241642
BTN2A1_Q7KYR7_OID20713_v1_Inflammation	8099_42_SPON2_SPON2	143	MR Egger	0.0208218658078947	0.0204308874794151	1.02104015327404	0.98096090377456	1.06275692597578	0.309883586905994
BTN2A1_Q7KYR7_OID20713_v1_Inflammation	8099_42_SPON2_SPON2	143	Weighted median	0.0539947612592076	0.0124810158348783	1.05547907275932	1.02997236339152	1.08161744201034	1.51737307361765e-05
BTN2A1_Q7KYR7_OID20713_v1_Inflammation	8099_42_SPON2_SPON2	143	Inverse variance weighted	0.0549344546724055	0.00896929769425588	1.05647136564429	1.03806108441027	1.0752081579673	9.08420893034933e-10
BTN2A1_Q7KYR7_OID20713_v1_Inflammation	8099_42_SPON2_SPON2	143	Simple mode	0.060147537986287	0.0247808280785102	1.06199321932851	1.01164438911061	1.11484787543898	0.0164693610275442
BTN2A1_Q7KYR7_OID20713_v1_Inflammation	8099_42_SPON2_SPON2	143	Weighted mode	0.060147537986287	0.0171114693379729	1.06199321932851	1.02696624012504	1.09821487195374	0.000590427852719922
BTN2A1_Q7KYR7_OID20713_v1_Inflammation	9294_45_MFAP2_MFAP2	143	MR Egger	-0.00873593	0.0232403236456239	0.991302119090726	0.94716026792456	1.03750117545264	0.707559689608516
BTN2A1_Q7KYR7_OID20713_v1_Inflammation	9294_45_MFAP2_MFAP2	143	Weighted median	0.00114904881309931	0.0132553264677462	1.00114970922261	0.975474371859488	1.02750084388777	0.93092124985218
BTN2A1_Q7KYR7_OID20713_v1_Inflammation	9294_45_MFAP2_MFAP2	143	Inverse variance weighted	0.0245057191153601	0.0100921450992018	1.0248084520882	1.00473629567899	1.04528160074249	0.0151740874512061
BTN2A1_Q7KYR7_OID20713_v1_Inflammation	9294_45_MFAP2_MFAP2	143	Simple mode	-0.00502201	0.0255940742626904	0.994990583747388	0.946308748086455	1.04617680407993	0.844720456222975
BTN2A1_Q7KYR7_OID20713_v1_Inflammation	9294_45_MFAP2_MFAP2	143	Weighted mode	-0.00502201	0.0161922098082697	0.994990583747388	0.963908663118343	1.0270747630208	0.756902009717771
BTN2A1_Q7KYR7_OID20713_v1_Inflammation	9321_400_NMB_NMB	143	MR Egger	-0.00457839	0.0225051223305064	0.995432073067487	0.952477845509713	1.04032342249511	0.839086188237271
BTN2A1_Q7KYR7_OID20713_v1_Inflammation	9321_400_NMB_NMB	143	Weighted median	0.0242791441457195	0.0130660478058638	1.02457628244719	0.998670574915731	1.05115398903375	0.063142637608735
BTN2A1_Q7KYR7_OID20713_v1_Inflammation	9321_400_NMB_NMB	143	Inverse variance weighted	0.0440930845783519	0.00999057635675094	1.04507963115772	1.02481443268667	1.06574556390415	1.01727970867369e-05
BTN2A1_Q7KYR7_OID20713_v1_Inflammation	9321_400_NMB_NMB	143	Simple mode	0.0309250358821667	0.0305725538280562	1.03140818238387	0.971419213947429	1.09510170626085	0.313483624753738
BTN2A1_Q7KYR7_OID20713_v1_Inflammation	9321_400_NMB_NMB	143	Weighted mode	0.0309250358821667	0.0183853225103987	1.03140818238387	0.9949028386016	1.06925299377339	0.0947569167676587
BTN2A1_Q7KYR7_OID20713_v1_Inflammation	9343_16_IL2RB_IL_2_sRb	143	MR Egger	0.0344909140597793	0.034167678889545	1.03509262354369	0.968044001577334	1.10678516427847	0.314483118023267
BTN2A1_Q7KYR7_OID20713_v1_Inflammation	9343_16_IL2RB_IL_2_sRb	143	Weighted median	0.0867586343639133	0.014494811357004	1.0906334065211	1.0600846931223	1.12206244947883	2.1573151905731e-09
BTN2A1_Q7KYR7_OID20713_v1_Inflammation	9343_16_IL2RB_IL_2_sRb	143	Inverse variance weighted	0.093095490325567	0.0150019758982462	1.09756653725019	1.06576368527898	1.13031840015831	5.45064279218115e-10
BTN2A1_Q7KYR7_OID20713_v1_Inflammation	9343_16_IL2RB_IL_2_sRb	143	Simple mode	0.0626513741153412	0.0339871520296467	1.06465560802146	0.996044400214252	1.13799300859251	0.06735772020739
BTN2A1_Q7KYR7_OID20713_v1_Inflammation	9343_16_IL2RB_IL_2_sRb	143	Weighted mode	0.0705422543471065	0.0181950307469537	1.07308991118635	1.03549543576378	1.1120492835785	0.000161096409614608
C1RL_Q9NZP8_OID30721_v1_Inflammation_II	14254_27_PTPN4_PTN4	51	MR Egger	0.140366302514847	0.0632172620592237	1.15069522422238	1.01659668878477	1.30248260067718	0.031049271568493
C1RL_Q9NZP8_OID30721_v1_Inflammation_II	14254_27_PTPN4_PTN4	51	Weighted median	0.0600033812889697	0.0245780039222788	1.06184013692763	1.01190075067599	1.11424413475064	0.0146326776744112
C1RL_Q9NZP8_OID30721_v1_Inflammation_II	14254_27_PTPN4_PTN4	51	Inverse variance weighted	0.0891094327441264	0.0437993715814181	1.09320028168745	1.00326799272741	1.19119404241398	0.041902102564652
C1RL_Q9NZP8_OID30721_v1_Inflammation_II	14254_27_PTPN4_PTN4	51	Simple mode	-0.0210238	0.0554244824605684	0.979195618175914	0.878397699006122	1.09156030319727	0.706053453274929
C1RL_Q9NZP8_OID30721_v1_Inflammation_II	14254_27_PTPN4_PTN4	51	Weighted mode	0.013435571556129	0.0222637292131415	1.01352623442847	0.97025016594332	1.05873254541114	0.548921748398907
C1RL_Q9NZP8_OID30721_v1_Inflammation_II	15305_7_SCGN_Secretagogin	51	MR Egger	-0.00781518	0.0183915443472174	0.992215274510991	0.957085440911149	1.02863454911161	0.672745358641688
C1RL_Q9NZP8_OID30721_v1_Inflammation_II	15305_7_SCGN_Secretagogin	51	Weighted median	-0.0319798	0.0163167381554726	0.968526132519018	0.938041938128455	1.00000099275283	0.0500029021153653
C1RL_Q9NZP8_OID30721_v1_Inflammation_II	15305_7_SCGN_Secretagogin	51	Inverse variance weighted	-0.0268814	0.0130505830560356	0.973476725861912	0.948891796856631	0.998698628161932	0.0394193415611432
C1RL_Q9NZP8_OID30721_v1_Inflammation_II	15305_7_SCGN_Secretagogin	51	Simple mode	-0.0417223	0.0329211966750518	0.959136096992954	0.899201758586514	1.02306522843212	0.210905207118906
C1RL_Q9NZP8_OID30721_v1_Inflammation_II	15305_7_SCGN_Secretagogin	51	Weighted mode	-0.021069	0.0159530008717072	0.979151396141481	0.949009104668292	1.01025106276606	0.1926172310796
C1RL_Q9NZP8_OID30721_v1_Inflammation_II	15585_304_FBLN5_fibulin_5	51	MR Egger	0.0467626220586217	0.018285359605166	1.04787323756243	1.01098319448298	1.08610937154214	0.013692359815072
C1RL_Q9NZP8_OID30721_v1_Inflammation_II	15585_304_FBLN5_fibulin_5	51	Weighted median	0.0435202053528144	0.0181969099639322	1.04448109820792	1.00788518745087	1.08240579194621	0.0167739193727201
C1RL_Q9NZP8_OID30721_v1_Inflammation_II	15585_304_FBLN5_fibulin_5	51	Inverse variance weighted	0.0296999574361048	0.0127053501260884	1.03014540011215	1.00480899747885	1.05612066376281	0.0194082900167526
C1RL_Q9NZP8_OID30721_v1_Inflammation_II	15585_304_FBLN5_fibulin_5	51	Simple mode	0.00410689618769955	0.0340694910661058	1.0041153410426	0.939254027725086	1.07345573013844	0.904534788432901
C1RL_Q9NZP8_OID30721_v1_Inflammation_II	15585_304_FBLN5_fibulin_5	51	Weighted mode	0.0423538350981403	0.0163666739602392	1.04326355671352	1.01032812480414	1.07727264246706	0.0126113388380362
C1RL_Q9NZP8_OID30721_v1_Inflammation_II	3327_27_NTN4_NET4	51	MR Egger	0.0406270430737843	0.018973275942753	1.0414636120368	1.00344534382563	1.08092230620308	0.0372510702942614
C1RL_Q9NZP8_OID30721_v1_Inflammation_II	3327_27_NTN4_NET4	51	Weighted median	0.0354847336657938	0.0176879858317119	1.03612183022519	1.00082	1.07267248696521	0.044840361846904
C1RL_Q9NZP8_OID30721_v1_Inflammation_II	3327_27_NTN4_NET4	51	Inverse variance weighted	0.028709742088042	0.0130621261626412	1.02912583920196	1.00311280957045	1.0558134467116	0.027953531928886
C1RL_Q9NZP8_OID30721_v1_Inflammation_II	3327_27_NTN4_NET4	51	Simple mode	0.0218235342853104	0.0298234085603074	1.0220634094059	0.964032427460459	1.0835876295139	0.467731979089912
C1RL_Q9NZP8_OID30721_v1_Inflammation_II	3327_27_NTN4_NET4	51	Weighted mode	0.0351976057615457	0.0159326068249929	1.03582437344164	1.00397758606568	1.06868136052749	0.0317737243044119
C1RL_Q9NZP8_OID30721_v1_Inflammation_II	4430_44_COLEC11_Collectin_Kidney_1	51	MR Egger	0.0170947697122279	0.0185467222561069	1.01724172146252	0.98092742193533	1.05490038992125	0.361194000048537
C1RL_Q9NZP8_OID30721_v1_Inflammation_II	4430_44_COLEC11_Collectin_Kidney_1	51	Weighted median	0.0156581547424678	0.0192012119858764	1.01578138599866	0.978263497147043	1.05473814279126	0.414799086433876
C1RL_Q9NZP8_OID30721_v1_Inflammation_II	4430_44_COLEC11_Collectin_Kidney_1	51	Inverse variance weighted	0.0254273149354133	0.0127493882633413	1.02575334661254	1.00043861010056	1.05170863805534	0.0461089153879387
C1RL_Q9NZP8_OID30721_v1_Inflammation_II	4430_44_COLEC11_Collectin_Kidney_1	51	Simple mode	0.0366508033271028	0.0314560134480918	1.0373307251477	0.975307002652817	1.1033	0.249489148605991
C1RL_Q9NZP8_OID30721_v1_Inflammation_II	4430_44_COLEC11_Collectin_Kidney_1	51	Weighted mode	0.0248611647942496	0.0164004845345213	1.02517278056984	0.992742677579808	1.05866228354709	0.135846843762649
CASP4_P49662_OID31276_v1_Oncology_II	10024_44_HOGA1_HOGA1	7	MR Egger	0.083073853556755	0.0606965310874106	1.08662205648862	0.964745109877791	1.22389580580215	0.229389302046373
CASP4_P49662_OID31276_v1_Oncology_II	10024_44_HOGA1_HOGA1	7	Weighted median	0.116231778137366	0.0502526312328993	1.12325618819139	1.01789484887382	1.2395233807364	0.0207254378657777
CASP4_P49662_OID31276_v1_Oncology_II	10024_44_HOGA1_HOGA1	7	Inverse variance weighted	0.105943578439248	0.0413903667842331	1.11175914755063	1.02512900124261	1.20571011127797	0.0104786906503927
CASP4_P49662_OID31276_v1_Oncology_II	10024_44_HOGA1_HOGA1	7	Simple mode	0.186222293693895	0.0872560316331772	1.20469002561106	1.01531658644974	1.42938476252167	0.0767621861429742
CASP4_P49662_OID31276_v1_Oncology_II	10024_44_HOGA1_HOGA1	7	Weighted mode	0.118588514922879	0.0567320301213862	1.12590652922104	1.0074211370408	1.25832729325713	0.0815613424920579
CASP4_P49662_OID31276_v1_Oncology_II	11465_4_GPR135_GP135	7	MR Egger	0.0985238265183463	0.0672523058837332	1.10354069761383	0.967257343764924	1.25902592432111	0.202814531664815
CASP4_P49662_OID31276_v1_Oncology_II	11465_4_GPR135_GP135	7	Weighted median	0.138106330154484	0.0514119037314335	1.14809762118158	1.03804485720209	1.26981809949488	0.00722543571697664
CASP4_P49662_OID31276_v1_Oncology_II	11465_4_GPR135_GP135	7	Inverse variance weighted	0.133089725499983	0.0438766418337755	1.14235249188117	1.04821792449889	1.24494075631361	0.00241918603809856
CASP4_P49662_OID31276_v1_Oncology_II	11465_4_GPR135_GP135	7	Simple mode	0.266009026238589	0.100282519042502	1.30474683559001	1.07192413324259	1.58813879843573	0.0378969248206489
CASP4_P49662_OID31276_v1_Oncology_II	11465_4_GPR135_GP135	7	Weighted mode	0.143542504343196	0.0551592371867333	1.15435587490266	1.03606553489493	1.28615173562107	0.0405353647238602
CASP4_P49662_OID31276_v1_Oncology_II	13378_80_C5orf63_YD286	7	MR Egger	0.0633725434100278	0.0615698155062058	1.06542368187773	0.944306677859175	1.20207518226953	0.35054096944421
CASP4_P49662_OID31276_v1_Oncology_II	13378_80_C5orf63_YD286	7	Weighted median	0.0878115757959074	0.0482129866762345	1.09178238441901	0.99333642266568	1.19998	0.0685572861284618
CASP4_P49662_OID31276_v1_Oncology_II	13378_80_C5orf63_YD286	7	Inverse variance weighted	0.102911237926422	0.0419551718522306	1.1083930214466	1.02089439517558	1.20339096364638	0.0141715390457468
CASP4_P49662_OID31276_v1_Oncology_II	13378_80_C5orf63_YD286	7	Simple mode	0.0762431845074297	0.0743853921199535	1.07922499304623	0.932811454237026	1.24861951504261	0.344910466536044
CASP4_P49662_OID31276_v1_Oncology_II	13378_80_C5orf63_YD286	7	Weighted mode	0.0823558080183805	0.0535387961397966	1.08584209242743	0.977672792996626	1.20597919685718	0.174907729655196
CASP4_P49662_OID31276_v1_Oncology_II	16773_29_SCUBE3_SCUB3	7	MR Egger	0.061302754675425	0.0616772186962792	1.06322076052075	0.942155829518734	1.19984226619897	0.36589307690398
CASP4_P49662_OID31276_v1_Oncology_II	16773_29_SCUBE3_SCUB3	7	Weighted median	0.116088865639939	0.0514201232026702	1.12309567231442	1.01542315202521	1.24218547376597	0.0239672163742072
CASP4_P49662_OID31276_v1_Oncology_II	16773_29_SCUBE3_SCUB3	7	Inverse variance weighted	0.0833330772701308	0.0420712793955636	1.08690377120513	1.00087375115316	1.18032849447679	0.0476182748234075
CASP4_P49662_OID31276_v1_Oncology_II	16773_29_SCUBE3_SCUB3	7	Simple mode	0.127045902772374	0.0849401925854002	1.13546913776662	0.961330636364898	1.34115164340928	0.18536092674459
CASP4_P49662_OID31276_v1_Oncology_II	16773_29_SCUBE3_SCUB3	7	Weighted mode	0.121186018894808	0.0566044996955286	1.12883487745433	1.01029382005424	1.26128474238209	0.0760531156100316
CASP4_P49662_OID31276_v1_Oncology_II	17857_6_ACADL_ACADL	7	MR Egger	0.0927504869291774	0.060611269425339	1.09718793837978	0.97428871124721	1.23558998295795	0.186510053080608
CASP4_P49662_OID31276_v1_Oncology_II	17857_6_ACADL_ACADL	7	Weighted median	0.101813062882377	0.0479408591881488	1.10717648000145	1.00787986285799	1.21625582873771	0.0336933869959477
CASP4_P49662_OID31276_v1_Oncology_II	17857_6_ACADL_ACADL	7	Inverse variance weighted	0.084976172235928	0.0414469384160324	1.08869112531406	1.00374717611562	1.18082361230081	0.0403410135372162
CASP4_P49662_OID31276_v1_Oncology_II	17857_6_ACADL_ACADL	7	Simple mode	0.0510827014303007	0.0827998640923129	1.05240992549041	0.894755276486377	1.23784310679904	0.559939833762029
CASP4_P49662_OID31276_v1_Oncology_II	17857_6_ACADL_ACADL	7	Weighted mode	0.123327731014979	0.0554419247656535	1.13125510758603	1.01476956633169	1.26111204050553	0.0677816452652391
CASP4_P49662_OID31276_v1_Oncology_II	6600_70_RELL2_RELL2	7	MR Egger	0.0877622355398393	0.0608588434665198	1.09172851692552	0.968970513232941	1.23003862180671	0.208860998437577
CASP4_P49662_OID31276_v1_Oncology_II	6600_70_RELL2_RELL2	7	Weighted median	0.0919624687107512	0.0503432258122374	1.09632367486772	0.993312209599039	1.21001794648293	0.0677433997841727
CASP4_P49662_OID31276_v1_Oncology_II	6600_70_RELL2_RELL2	7	Inverse variance weighted	0.102896906028185	0.0415231076404139	1.10837713618445	1.02174465788679	1.20235507622547	0.0132097556728923
CASP4_P49662_OID31276_v1_Oncology_II	6600_70_RELL2_RELL2	7	Simple mode	0.0803579816910724	0.0659189661772737	1.08367493403175	0.952330451008571	1.23313431950539	0.26857536160591
CASP4_P49662_OID31276_v1_Oncology_II	6600_70_RELL2_RELL2	7	Weighted mode	0.0871315312153364	0.0500299823043938	1.09104017612129	0.989132251253986	1.20344743021135	0.132220066456922
CASP4_P49662_OID31276_v1_Oncology_II	6986_17_HS3ST3B1_HS3SB	7	MR Egger	0.0912894279958574	0.0617423588735793	1.09558605265056	0.970711864810089	1.23652428931347	0.199316006290772
CASP4_P49662_OID31276_v1_Oncology_II	6986_17_HS3ST3B1_HS3SB	7	Weighted median	0.118827013577793	0.0513142879359794	1.12617508843805	1.01841857676535	1.24533306712322	0.0205762335223688
CASP4_P49662_OID31276_v1_Oncology_II	6986_17_HS3ST3B1_HS3SB	7	Inverse variance weighted	0.10926896623135	0.0421037169396402	1.11546233169678	1.02710655686303	1.2114188202971	0.00945267450252048
CASP4_P49662_OID31276_v1_Oncology_II	6986_17_HS3ST3B1_HS3SB	7	Simple mode	0.142544972089833	0.0879033847744155	1.15320494182746	0.970692386049256	1.37003406740205	0.156014
CASP4_P49662_OID31276_v1_Oncology_II	6986_17_HS3ST3B1_HS3SB	7	Weighted mode	0.121480377988011	0.0554372079014543	1.12916720917526	1.01290602352205	1.25877283446611	0.0709461243976357
CASP4_P49662_OID31276_v1_Oncology_II	7003_4_GALNT10_GLT10	7	MR Egger	0.0455031778937439	0.0602479771708624	1.04655433044712	0.929988687059339	1.17773041953976	0.484127428701598
CASP4_P49662_OID31276_v1_Oncology_II	7003_4_GALNT10_GLT10	7	Weighted median	0.0945200667404341	0.0496337500557939	1.09913121889257	0.997241727673733	1.21143089265065	0.0568645251060437
CASP4_P49662_OID31276_v1_Oncology_II	7003_4_GALNT10_GLT10	7	Inverse variance weighted	0.0990494469716277	0.041073999202078	1.10412089364362	1.01871742391401	1.19668410411254	0.0158875844379451
CASP4_P49662_OID31276_v1_Oncology_II	7003_4_GALNT10_GLT10	7	Simple mode	0.0911926648133987	0.0928151293019688	1.09548004538634	0.913268835690816	1.31404519998964	0.363787303868422
CASP4_P49662_OID31276_v1_Oncology_II	7003_4_GALNT10_GLT10	7	Weighted mode	0.0962393394653063	0.057010455711201	1.1010225506099	0.984618370768656	1.23118833950373	0.142358722777759
CASP4_P49662_OID31276_v1_Oncology_II	8064_125_PVR_Poliovirus_receptor	7	MR Egger	0.122150797866262	0.0613521831760268	1.12992447913422	1.00190232597183	1.27430518469784	0.10312116518014
CASP4_P49662_OID31276_v1_Oncology_II	8064_125_PVR_Poliovirus_receptor	7	Weighted median	0.132649219919235	0.0493621941019225	1.14184939005104	1.03655148069458	1.25784396997461	0.00720401087274324
CASP4_P49662_OID31276_v1_Oncology_II	8064_125_PVR_Poliovirus_receptor	7	Inverse variance weighted	0.128660956243912	0.0417317450942992	1.1373044628145	1.0479823413071	1.23423972919668	0.00204892384207895
CASP4_P49662_OID31276_v1_Oncology_II	8064_125_PVR_Poliovirus_receptor	7	Simple mode	0.11286149797914	0.0722871955888898	1.1194768724016	0.971589969718805	1.28987382218939	0.16947780327215
CASP4_P49662_OID31276_v1_Oncology_II	8064_125_PVR_Poliovirus_receptor	7	Weighted mode	0.135422918823669	0.0521721497938469	1.14502093287234	1.03372161141495	1.26830369244314	0.0408980084704989
CASP4_P49662_OID31276_v1_Oncology_II	8253_2_POMGNT1_PMGT1	7	MR Egger	0.0621636333613825	0.0736099565131954	1.06413645870793	0.921168891261473	1.22929292716423	0.43692074707221
CASP4_P49662_OID31276_v1_Oncology_II	8253_2_POMGNT1_PMGT1	7	Weighted median	0.122102685061695	0.050665093269645	1.12987011660635	1.02306098825312	1.24783028094919	0.0159526842518077
CASP4_P49662_OID31276_v1_Oncology_II	8253_2_POMGNT1_PMGT1	7	Inverse variance weighted	0.103756654208976	0.0484822935186139	1.1093304711662	1.00876958841087	1.21991593362407	0.0323471896478211
CASP4_P49662_OID31276_v1_Oncology_II	8253_2_POMGNT1_PMGT1	7	Simple mode	0.134057067605279	0.0971854157421522	1.14345807219664	0.945136093804714	1.38339480572395	0.216980774842042
CASP4_P49662_OID31276_v1_Oncology_II	8253_2_POMGNT1_PMGT1	7	Weighted mode	0.1299561109258	0.0578050616077755	1.13877840229802	1.01679771147196	1.27539257308429	0.0656052246152616
CASP4_P49662_OID31276_v1_Oncology_II	8815_1_OLFML1_OLFL1	7	MR Egger	0.0459875703748727	0.0612982635457671	1.04706139629541	0.928525879526161	1.18073	0.486899470253546
CASP4_P49662_OID31276_v1_Oncology_II	8815_1_OLFML1_OLFL1	7	Weighted median	0.0808933582549868	0.0508323358746407	1.08425526352787	0.981436445227756	1.19784575170844	0.111524986983232
CASP4_P49662_OID31276_v1_Oncology_II	8815_1_OLFML1_OLFL1	7	Inverse variance weighted	0.0864063440132647	0.0418024813469244	1.09024925456638	1.00448350152478	1.18333793962589	0.0387327675332183
CASP4_P49662_OID31276_v1_Oncology_II	8815_1_OLFML1_OLFL1	7	Simple mode	0.0954852034639657	0.0820272658837761	1.10019254287489	0.93679740415927	1.2920868760133	0.288587180624678
CASP4_P49662_OID31276_v1_Oncology_II	8815_1_OLFML1_OLFL1	7	Weighted mode	0.082467024175424	0.0552080035273312	1.08596286232777	0.974587803770701	1.21006576707847	0.185856120378775
CASP4_P49662_OID31276_v1_Oncology_II	9092_33_ANGPTL1_ANGL1	7	MR Egger	0.0816129097460401	0.0678517331780038	1.0850357217757	0.949920970036879	1.23936891032483	0.282893313198339
CASP4_P49662_OID31276_v1_Oncology_II	9092_33_ANGPTL1_ANGL1	7	Weighted median	0.116879448021219	0.052414660930076	1.12398392303686	1.01424725087286	1.24559357509533	0.0257540879590585
CASP4_P49662_OID31276_v1_Oncology_II	9092_33_ANGPTL1_ANGL1	7	Inverse variance weighted	0.0850331804838322	0.0423033529203259	1.08875319145674	1.00212085459727	1.18287480643602	0.0444225802642551
CASP4_P49662_OID31276_v1_Oncology_II	9092_33_ANGPTL1_ANGL1	7	Simple mode	0.163928345801756	0.100409102586262	1.17812989411521	0.967660965538175	1.43437639507962	0.153672037029055
CASP4_P49662_OID31276_v1_Oncology_II	9092_33_ANGPTL1_ANGL1	7	Weighted mode	0.133976141202856	0.0556894984549064	1.14336553999274	1.02513542337719	1.2752312799183	0.0528775866251204
CASP4_P49662_OID31276_v1_Oncology_II	9343_16_IL2RB_IL_2_sRb	7	MR Egger	-0.0769798	0.0635180866547531	0.925908594774505	0.81752384470752	1.04866265544097	0.279678748543158
CASP4_P49662_OID31276_v1_Oncology_II	9343_16_IL2RB_IL_2_sRb	7	Weighted median	-0.092524	0.0517136251362609	0.911627311639707	0.82375450259085	1.00887382431732	0.0735888261420109
CASP4_P49662_OID31276_v1_Oncology_II	9343_16_IL2RB_IL_2_sRb	7	Inverse variance weighted	-0.101505	0.0432905285220504	0.903477111475865	0.829979781315086	0.983482862278172	0.0190409787640448
CASP4_P49662_OID31276_v1_Oncology_II	9343_16_IL2RB_IL_2_sRb	7	Simple mode	-0.102433	0.0828306117441911	0.902638720027031	0.767374068430556	1.06174640558077	0.26242302719863
CASP4_P49662_OID31276_v1_Oncology_II	9343_16_IL2RB_IL_2_sRb	7	Weighted mode	-0.0927109	0.0535251779466282	0.911456990429219	0.820681472174635	1.01227318218963	0.133965795601799
CCL21_O00585_OID20686_v1_Inflammation	13565_2_RBL2_p130	50	MR Egger	-0.122028	0.0601756229651249	0.885123436714615	0.786649581579086	0.995924381792514	0.0481441363464068
CCL21_O00585_OID20686_v1_Inflammation	13565_2_RBL2_p130	50	Weighted median	-0.0767432	0.0322110404578091	0.926127632144335	0.8694652935098	0.98648260882147	0.0171949255614394
CCL21_O00585_OID20686_v1_Inflammation	13565_2_RBL2_p130	50	Inverse variance weighted	-0.0565185	0.0237964821057136	0.945049002880303	0.901983002925629	0.990171228225123	0.0175452484979478
CCL21_O00585_OID20686_v1_Inflammation	13565_2_RBL2_p130	50	Simple mode	-0.0487844	0.0746872396809999	0.952386476499629	0.822693674424576	1.10252458334969	0.516692223311855
CCL21_O00585_OID20686_v1_Inflammation	13565_2_RBL2_p130	50	Weighted mode	-0.0785192	0.0574205670411114	0.924484270833003	0.826080086283293	1.03461054346797	0.177727072306332
CCL21_O00585_OID20686_v1_Inflammation	15585_304_FBLN5_fibulin_5	50	MR Egger	0.0442292828217632	0.0675368163007074	1.04522197886125	0.915630044786338	1.19315545761667	0.515663851595491
CCL21_O00585_OID20686_v1_Inflammation	15585_304_FBLN5_fibulin_5	50	Weighted median	0.048278760344867	0.0333404581049841	1.04946316326609	0.983076304693466	1.12033310720054	0.14760214504767
CCL21_O00585_OID20686_v1_Inflammation	15585_304_FBLN5_fibulin_5	50	Inverse variance weighted	0.0572428533104325	0.0263571962496617	1.05891293968475	1.00559836124259	1.11505413796244	0.0298699085678993
CCL21_O00585_OID20686_v1_Inflammation	15585_304_FBLN5_fibulin_5	50	Simple mode	0.103894496055979	0.0853325935330543	1.10948339386661	0.938607967201951	1.31146702806638	0.229235810123802
CCL21_O00585_OID20686_v1_Inflammation	15585_304_FBLN5_fibulin_5	50	Weighted mode	0.103894496055979	0.0776510359996609	1.10948339386661	0.95284642768095	1.29186967123515	0.187083793376886
CCL21_O00585_OID20686_v1_Inflammation	2516_57_CCL21_6Ckine	50	MR Egger	0.93296734786098	0.243219082564755	2.54204111742077	1.57815737170388	4.09463159918016	0.000364761017351525
CCL21_O00585_OID20686_v1_Inflammation	2516_57_CCL21_6Ckine	50	Weighted median	0.555412632783866	0.0499603174899488	1.74265991504885	1.58010359367015	1.92193954351072	1.03612605851546e-28
CCL21_O00585_OID20686_v1_Inflammation	2516_57_CCL21_6Ckine	50	Inverse variance weighted	0.797991999343938	0.0952285482149987	2.22107652461099	1.84290668418589	2.67684792209503	5.30375328146469e-17
CCL21_O00585_OID20686_v1_Inflammation	2516_57_CCL21_6Ckine	50	Simple mode	0.826944616363191	0.129629945283047	2.28632246530594	1.77334913189378	2.94768262004919	6.07406992040597e-08
CCL21_O00585_OID20686_v1_Inflammation	2516_57_CCL21_6Ckine	50	Weighted mode	0.464975070011003	0.075013423339294	1.59197450048561	1.37430584035769	1.84411848932897	1.15598356054268e-07
CCL21_O00585_OID20686_v1_Inflammation	3054_3_HP_Haptoglobin__Mixed_Type	50	MR Egger	0.0358513000299414	0.069778541182555	1.03650170725812	0.904010195280984	1.18841114265872	0.609758188136119
CCL21_O00585_OID20686_v1_Inflammation	3054_3_HP_Haptoglobin__Mixed_Type	50	Weighted median	-0.0396889	0.0298616944073205	0.961088432943528	0.906451481155009	1.01901866248911	0.183818576963219
CCL21_O00585_OID20686_v1_Inflammation	3054_3_HP_Haptoglobin__Mixed_Type	50	Inverse variance weighted	-0.0822647	0.0279586387703888	0.921028107564146	0.871914721191227	0.9729079625634	0.00325708073642247
CCL21_O00585_OID20686_v1_Inflammation	3054_3_HP_Haptoglobin__Mixed_Type	50	Simple mode	-0.0587693	0.0563469124728276	0.942924274784053	0.844332207983651	1.05302886656463	0.302071252505546
CCL21_O00585_OID20686_v1_Inflammation	3054_3_HP_Haptoglobin__Mixed_Type	50	Weighted mode	-0.0347435	0.0428181055721135	0.965853141826294	0.888103516327449	1.05040941109366	0.421048448069895
CCL21_O00585_OID20686_v1_Inflammation	3580_25_SERPINA1_a1_Antitrypsin	50	MR Egger	-0.0122515	0.0555195534965713	0.98782326685358	0.885972114993813	1.1013832038541	0.826285668645062
CCL21_O00585_OID20686_v1_Inflammation	3580_25_SERPINA1_a1_Antitrypsin	50	Weighted median	-0.0410688	0.0306523450411045	0.95976310684334	0.903799816572101	1.01919164439673	0.180302134671709
CCL21_O00585_OID20686_v1_Inflammation	3580_25_SERPINA1_a1_Antitrypsin	50	Inverse variance weighted	-0.0610551	0.0218288248395054	0.940771432734441	0.90136989813764	0.98189532452532	0.00515806735389228
CCL21_O00585_OID20686_v1_Inflammation	3580_25_SERPINA1_a1_Antitrypsin	50	Simple mode	-0.112297	0.073543291404542	0.893778628783439	0.773799870219148	1.03236026266554	0.133202446387516
CCL21_O00585_OID20686_v1_Inflammation	3580_25_SERPINA1_a1_Antitrypsin	50	Weighted mode	0.0352246545164725	0.0468250633252284	1.03585239158019	0.945016898534699	1.1354190372745	0.455492935772894
CCL21_O00585_OID20686_v1_Inflammation	5337_64_CD86_B7_2	50	MR Egger	0.0565806259611163	0.114838843979267	1.05821193071482	0.844928299203962	1.32533434063246	0.624473809149709
CCL21_O00585_OID20686_v1_Inflammation	5337_64_CD86_B7_2	50	Weighted median	0.0514183989718301	0.0349059120575364	1.05276327622125	0.983146448589036	1.12730968753504	0.140735660012771
CCL21_O00585_OID20686_v1_Inflammation	5337_64_CD86_B7_2	50	Inverse variance weighted	0.10187547617166	0.0449183520669441	1.10724558468388	1.01393165966784	1.20914735535883	0.0233283197050466
CCL21_O00585_OID20686_v1_Inflammation	5337_64_CD86_B7_2	50	Simple mode	0.0243554411987317	0.0725318041192638	1.02465445758035	0.888867680947544	1.18118453392305	0.738462971122171
CCL21_O00585_OID20686_v1_Inflammation	5337_64_CD86_B7_2	50	Weighted mode	0.0435839306790515	0.0504405250516115	1.04454766022747	0.94622064381405	1.1530923803234	0.39176195067762
CCL21_O00585_OID20686_v1_Inflammation	5660_51_SOD3_SOD3	50	MR Egger	0.137240182209403	0.0747316113207842	1.14710362932038	0.990808724416443	1.32805323971586	0.0724894945461364
CCL21_O00585_OID20686_v1_Inflammation	5660_51_SOD3_SOD3	50	Weighted median	0.130875768003342	0.0329969535150784	1.13982616963492	1.0684422420164	1.21597934440772	7.29974257810088e-05
CCL21_O00585_OID20686_v1_Inflammation	5660_51_SOD3_SOD3	50	Inverse variance weighted	0.0779260772984017	0.0293314135221634	1.08104274211626	1.0206467620517	1.14501260743042	0.00788991688096006
CCL21_O00585_OID20686_v1_Inflammation	5660_51_SOD3_SOD3	50	Simple mode	0.133737828023668	0.0607119445080634	1.14309309338103	1.01485162220489	1.28753976595763	0.0323407015201294
CCL21_O00585_OID20686_v1_Inflammation	5660_51_SOD3_SOD3	50	Weighted mode	0.146770022827326	0.0465282680986278	1.15808759869051	1.05714789570831	1.26866533215029	0.00274689225387675
CCL21_O00585_OID20686_v1_Inflammation	7905_30_HP_HPT	50	MR Egger	0.0302319478007459	0.069805196246722	1.03069357333769	0.898897526733945	1.18181351102332	0.666889204450234
CCL21_O00585_OID20686_v1_Inflammation	7905_30_HP_HPT	50	Weighted median	-0.0344705	0.0290482907372975	0.966116812638681	0.912647851263479	1.02271834023489	0.235360626743966
CCL21_O00585_OID20686_v1_Inflammation	7905_30_HP_HPT	50	Inverse variance weighted	-0.0822534	0.0276969739484456	0.921038546314657	0.872371895902744	0.972420143039535	0.00298031593845127
CCL21_O00585_OID20686_v1_Inflammation	7905_30_HP_HPT	50	Simple mode	-0.0242108	0.0532912767804472	0.976079951911001	0.879271389911942	1.08354722268172	0.651611634542391
CCL21_O00585_OID20686_v1_Inflammation	7905_30_HP_HPT	50	Weighted mode	-0.0242108	0.0397187200127112	0.976079951911001	0.902975850813924	1.05510249434003	0.544972370203935
CCL21_O00585_OID20686_v1_Inflammation	9294_45_MFAP2_MFAP2	50	MR Egger	0.0586906161318743	0.0587681991849937	1.06044710475557	0.945071158549695	1.18990834902867	0.322957915398728
CCL21_O00585_OID20686_v1_Inflammation	9294_45_MFAP2_MFAP2	50	Weighted median	0.0306922260761021	0.0311108671638049	1.03116808839416	0.970168924609486	1.0960025615647	0.323866443873577
CCL21_O00585_OID20686_v1_Inflammation	9294_45_MFAP2_MFAP2	50	Inverse variance weighted	0.0571307063132989	0.0228219714113291	1.05879419243704	1.01247683664286	1.10723040899931	0.0123034111585016
CCL21_O00585_OID20686_v1_Inflammation	9294_45_MFAP2_MFAP2	50	Simple mode	-0.00911435	0.0698964936747136	0.990927064050372	0.864061378044661	1.13641978592953	0.896785612755782
CCL21_O00585_OID20686_v1_Inflammation	9294_45_MFAP2_MFAP2	50	Weighted mode	0.0193891733324911	0.0597171793575025	1.01957836412656	0.906960392772337	1.14618019582684	0.746802873623606
CCL21_O00585_OID20686_v1_Inflammation	9343_16_IL2RB_IL_2_sRb	50	MR Egger	-0.042624	0.220289497340465	0.958271595708716	0.622263617831394	1.47571611906603	0.847390913127066
CCL21_O00585_OID20686_v1_Inflammation	9343_16_IL2RB_IL_2_sRb	50	Weighted median	-0.00108905	0.0348864184964451	0.998911543994218	0.932891450904365	1.06960383414126	0.975096494414432
CCL21_O00585_OID20686_v1_Inflammation	9343_16_IL2RB_IL_2_sRb	50	Inverse variance weighted	0.236440968472964	0.0871600713040203	1.26673277624286	1.06780723077434	1.50271685765259	0.0066733236970214
CCL21_O00585_OID20686_v1_Inflammation	9343_16_IL2RB_IL_2_sRb	50	Simple mode	-0.0493197	0.0605887283851095	0.951876779229528	0.845291624185258	1.07190155079284	0.419578899011466
CCL21_O00585_OID20686_v1_Inflammation	9343_16_IL2RB_IL_2_sRb	50	Weighted mode	-0.02965	0.0446996017711141	0.970785201754176	0.889352803317173	1.05967384870186	0.510235684105889
CD27_P26842_OID21527_v1_Oncology	10011_65_OCRL_OCRL	44	MR Egger	0.0666680308706397	0.030463042782493	1.06894056399922	1.00698474736901	1.13470827869873	0.0342466382038476
CD27_P26842_OID21527_v1_Oncology	10011_65_OCRL_OCRL	44	Weighted median	0.0492770906047597	0.0265080174254867	1.05051139725341	0.997324960761811	1.10653421821143	0.0630341638229363
CD27_P26842_OID21527_v1_Oncology	10011_65_OCRL_OCRL	44	Inverse variance weighted	0.0539336812896529	0.0187275884753521	1.05541460609852	1.01737685896242	1.09487451081021	0.00397794637794466
CD27_P26842_OID21527_v1_Oncology	10011_65_OCRL_OCRL	44	Simple mode	0.00633188474209234	0.0540807030900894	1.00635197350181	0.905139418718685	1.11888210106309	0.907340121002424
CD27_P26842_OID21527_v1_Oncology	10011_65_OCRL_OCRL	44	Weighted mode	0.0448036663211367	0.0262630906382587	1.04582250957004	0.993350216985624	1.10106657533373	0.0952305942133869
CD27_P26842_OID21527_v1_Oncology	10024_44_HOGA1_HOGA1	44	MR Egger	0.0484931005921187	0.0317842810125183	1.04968812956879	0.986290749367786	1.11716060407532	0.134581876233348
CD27_P26842_OID21527_v1_Oncology	10024_44_HOGA1_HOGA1	44	Weighted median	0.0270078101112242	0.0262780827628605	1.02737582665163	0.975800389828682	1.08167725714214	0.304058299991434
CD27_P26842_OID21527_v1_Oncology	10024_44_HOGA1_HOGA1	44	Inverse variance weighted	0.0514297430205887	0.0195254803031265	1.05277521888692	1.0132467729054	1.09384573545135	0.00843902243367619
CD27_P26842_OID21527_v1_Oncology	10024_44_HOGA1_HOGA1	44	Simple mode	0.0500534362526782	0.0434450213431604	1.05132727386491	0.96551001376767	1.14477221469625	0.25564123332398
CD27_P26842_OID21527_v1_Oncology	10024_44_HOGA1_HOGA1	44	Weighted mode	0.0317375952460172	0.0252783745773695	1.03224660334769	0.982349606789282	1.08467804410839	0.216068705222226
CD27_P26842_OID21527_v1_Oncology	10816_150_PILRA_PILRA_isoform_FDF03_M14	44	MR Egger	0.0270395148333767	0.0271739821084763	1.02740839983312	0.974119307930697	1.08361266577292	0.325409643083975
CD27_P26842_OID21527_v1_Oncology	10816_150_PILRA_PILRA_isoform_FDF03_M14	44	Weighted median	0.0292434687546126	0.019647446941561	1.02967525771221	0.99077726547905	1.07010038813524	0.136642636621224
CD27_P26842_OID21527_v1_Oncology	10816_150_PILRA_PILRA_isoform_FDF03_M14	44	Inverse variance weighted	0.042782684845839	0.0167510415672242	1.04371105597471	1.01000031564617	1.07854695834122	0.0106483676995461
CD27_P26842_OID21527_v1_Oncology	10816_150_PILRA_PILRA_isoform_FDF03_M14	44	Simple mode	0.0433276925999433	0.0341152659638723	1.04428004162998	0.976736634593838	1.11649421832139	0.210900763224146
CD27_P26842_OID21527_v1_Oncology	10816_150_PILRA_PILRA_isoform_FDF03_M14	44	Weighted mode	0.0329809824866584	0.0183089401574131	1.03353088386703	0.997099673874088	1.07129318752727	0.078661075566306
CD27_P26842_OID21527_v1_Oncology	10851_77_EBI3_IL27B	44	MR Egger	0.0288853953566702	0.0363056912325011	1.02930662439673	0.958607316827678	1.10522015472729	0.430728950088627
CD27_P26842_OID21527_v1_Oncology	10851_77_EBI3_IL27B	44	Weighted median	0.0172796539906875	0.0252041920067763	1.01742981085106	0.968389823695318	1.06895321974605	0.492973891773848
CD27_P26842_OID21527_v1_Oncology	10851_77_EBI3_IL27B	44	Inverse variance weighted	0.0561173222862731	0.022529321369827	1.05772177079377	1.01203165740972	1.10547465212166	0.012743532774215
CD27_P26842_OID21527_v1_Oncology	10851_77_EBI3_IL27B	44	Simple mode	0.0616674487416807	0.041165200296758	1.06360858153695	0.981163326135379	1.15298155218956	0.141426477913296
CD27_P26842_OID21527_v1_Oncology	10851_77_EBI3_IL27B	44	Weighted mode	0.0283600648524042	0.0233957913610493	1.0287660402338	0.982656474624442	1.07703922262643	0.232059536009019
CD27_P26842_OID21527_v1_Oncology	11327_56_CLK2_CLK2	44	MR Egger	0.0548384095739767	0.0273440818257057	1.05636990162063	1.00124	1.11453002069732	0.0513812085577173
CD27_P26842_OID21527_v1_Oncology	11327_56_CLK2_CLK2	44	Weighted median	0.0610917552507079	0.0260371029468122	1.06299644521797	1.01010979561543	1.11865209846577	0.0189590794173936
CD27_P26842_OID21527_v1_Oncology	11327_56_CLK2_CLK2	44	Inverse variance weighted	0.04816487931124	0.0169200583517854	1.04934365612123	1.01511465320977	1.08472683864837	0.00441868694107843
CD27_P26842_OID21527_v1_Oncology	11327_56_CLK2_CLK2	44	Simple mode	0.0603339201963925	0.0450823470828557	1.06219117441893	0.972361645852446	1.16031940978539	0.187831095170898
CD27_P26842_OID21527_v1_Oncology	11327_56_CLK2_CLK2	44	Weighted mode	0.0586518000841618	0.0256696398423483	1.06040594318903	1.00837417486538	1.11512253326076	0.0273144224550041
CD27_P26842_OID21527_v1_Oncology	13111_79_BCL6_BCL6	44	MR Egger	0.028290219242095	0.0272612694258104	1.02869418795117	0.975171555764247	1.08515442854072	0.30532707387404
CD27_P26842_OID21527_v1_Oncology	13111_79_BCL6_BCL6	44	Weighted median	0.0381613155030776	0.027319704933708	1.03889880984591	0.984732443013441	1.0960446614274	0.162461042659473
CD27_P26842_OID21527_v1_Oncology	13111_79_BCL6_BCL6	44	Inverse variance weighted	0.0469200915980801	0.0168796821329131	1.04803825867112	1.01393207385609	1.08329169178081	0.00544127189026341
CD27_P26842_OID21527_v1_Oncology	13111_79_BCL6_BCL6	44	Simple mode	0.0506296417798952	0.0463558267881763	1.05193322901161	0.960570616681444	1.1519856001027	0.280828746785941
CD27_P26842_OID21527_v1_Oncology	13111_79_BCL6_BCL6	44	Weighted mode	0.0369666533040325	0.0270717905093463	1.03765841778144	0.984034761236209	1.09420422368007	0.179195590140605
CD27_P26842_OID21527_v1_Oncology	13672_3_HSPA6_HSP76	44	MR Egger	0.0412087657535616	0.0276874024741632	1.04206963129057	0.987026349750691	1.10018249941589	0.144127135508916
CD27_P26842_OID21527_v1_Oncology	13672_3_HSPA6_HSP76	44	Weighted median	0.0434804897385857	0.0272392993812139	1.04443961682329	0.990140390770245	1.10171660843103	0.11043497033998
CD27_P26842_OID21527_v1_Oncology	13672_3_HSPA6_HSP76	44	Inverse variance weighted	0.0453605989255489	0.0169619823481678	1.0464051244476	1.01218879877873	1.08177810877906	0.00748963630432905
CD27_P26842_OID21527_v1_Oncology	13672_3_HSPA6_HSP76	44	Simple mode	0.0139647559134077	0.0498185693093941	1.01406271859441	0.919725852339842	1.11807577728404	0.780582147214041
CD27_P26842_OID21527_v1_Oncology	13672_3_HSPA6_HSP76	44	Weighted mode	0.0347700796415553	0.0259751882170644	1.03538162611604	0.983988283253095	1.08945922420395	0.187739509413854
CD27_P26842_OID21527_v1_Oncology	13942_140_SPSB1_SPSB1	44	MR Egger	0.0405416914364887	0.0281345247331134	1.0413747252057	0.985504114814979	1.10041277554772	0.157000599525298
CD27_P26842_OID21527_v1_Oncology	13942_140_SPSB1_SPSB1	44	Weighted median	0.0326246641108082	0.026736889522182	1.03316268342329	0.98041469432131	1.08874860464769	0.222384651194705
CD27_P26842_OID21527_v1_Oncology	13942_140_SPSB1_SPSB1	44	Inverse variance weighted	0.038682825859175	0.0172507393221229	1.03944074763498	1.00488326123375	1.07518665055427	0.0249364002255489
CD27_P26842_OID21527_v1_Oncology	13942_140_SPSB1_SPSB1	44	Simple mode	0.00698864646966968	0.0496871918006524	1.0070131240479	0.9135672851369	1.11001723518673	0.888801005898622
CD27_P26842_OID21527_v1_Oncology	13942_140_SPSB1_SPSB1	44	Weighted mode	0.0292103418718135	0.0247657582120323	1.0296411483456	0.980855092667804	1.08085373904002	0.244697819595375
CD27_P26842_OID21527_v1_Oncology	15447_45_SORD_Sorbitol_dehydrogenase	44	MR Egger	0.112381000608374	0.037101925767552	1.11893909591822	1.0404582343904	1.20333970071162	0.00418528441884244
CD27_P26842_OID21527_v1_Oncology	15447_45_SORD_Sorbitol_dehydrogenase	44	Weighted median	0.102997005110981	0.0282193646985364	1.10848808927223	1.0488423690558	1.17152575097109	0.000262373333463164
CD27_P26842_OID21527_v1_Oncology	15447_45_SORD_Sorbitol_dehydrogenase	44	Inverse variance weighted	0.0797573786587782	0.0231047517151434	1.08302	1.03507311351234	1.13319683049643	0.000556467744048561
CD27_P26842_OID21527_v1_Oncology	15447_45_SORD_Sorbitol_dehydrogenase	44	Simple mode	0.0689024764856556	0.0540662741972367	1.0713317240188	0.963611165587444	1.19109419221952	0.209363285000055
CD27_P26842_OID21527_v1_Oncology	15447_45_SORD_Sorbitol_dehydrogenase	44	Weighted mode	0.102187290656677	0.0263912398124525	1.10759089372904	1.05175527678579	1.16639071364635	0.000362359684006398
CD27_P26842_OID21527_v1_Oncology	15585_304_FBLN5_fibulin_5	44	MR Egger	0.0163116185364114	0.0344604668390723	1.01644537928112	0.950059279872862	1.08747025680356	0.638419616538311
CD27_P26842_OID21527_v1_Oncology	15585_304_FBLN5_fibulin_5	44	Weighted median	0.0182963729404968	0.0266064831183754	1.01846477706558	0.966714244951528	1.07298563928294	0.491663156337157
CD27_P26842_OID21527_v1_Oncology	15585_304_FBLN5_fibulin_5	44	Inverse variance weighted	0.0585159845653957	0.021733501939633	1.06026193338536	1.01604569218056	1.10640237544187	0.00709329159696459
CD27_P26842_OID21527_v1_Oncology	15585_304_FBLN5_fibulin_5	44	Simple mode	0.0284185958349835	0.0426189114267786	1.02882625668323	0.946376809468046	1.11845879553599	0.508457709306211
CD27_P26842_OID21527_v1_Oncology	15585_304_FBLN5_fibulin_5	44	Weighted mode	0.0232213438998549	0.0256934459450022	1.02349305842203	0.973227111705789	1.07635517757212	0.371145199328258
CD27_P26842_OID21527_v1_Oncology	17231_1_LCP1_L_plastin	44	MR Egger	0.0422879244504213	0.0422153690506747	1.04319479680279	0.960353148745402	1.13318250218484	0.322216049754731
CD27_P26842_OID21527_v1_Oncology	17231_1_LCP1_L_plastin	44	Weighted median	0.0564350319629428	0.0281945238134069	1.05805787262415	1.00117445442074	1.11817321834251	0.045324435937364
CD27_P26842_OID21527_v1_Oncology	17231_1_LCP1_L_plastin	44	Inverse variance weighted	0.0787202856569702	0.0263066211437427	1.08190165633129	1.02753148393207	1.13914873877458	0.00276781180024788
CD27_P26842_OID21527_v1_Oncology	17231_1_LCP1_L_plastin	44	Simple mode	0.0770483039880739	0.0478178466012027	1.08009424799222	0.983463577541437	1.18621940983546	0.114434135986927
CD27_P26842_OID21527_v1_Oncology	17231_1_LCP1_L_plastin	44	Weighted mode	0.0614288217727204	0.0259083814696105	1.06335480612501	1.01070529001138	1.11874693333842	0.0222911737388813
CD27_P26842_OID21527_v1_Oncology	17712_7_IDI1_IDI1	44	MR Egger	0.0550524721383894	0.0371947036945896	1.05659605507537	0.982309205371229	1.13650082631459	0.146305087841073
CD27_P26842_OID21527_v1_Oncology	17712_7_IDI1_IDI1	44	Weighted median	0.0561246510959081	0.0272568052165589	1.05772952266368	1.00270496470457	1.11577361486783	0.039484085427152
CD27_P26842_OID21527_v1_Oncology	17712_7_IDI1_IDI1	44	Inverse variance weighted	0.0610870057505297	0.022821828401136	1.06299139652815	1.01649071736239	1.11161930924946	0.00743529484139041
CD27_P26842_OID21527_v1_Oncology	17712_7_IDI1_IDI1	44	Simple mode	0.0120254598757998	0.056608496037542	1.01209805642887	0.905808655415283	1.13085966854387	0.832773799542562
CD27_P26842_OID21527_v1_Oncology	17712_7_IDI1_IDI1	44	Weighted mode	0.0516960348619941	0.0257027744383566	1.05305560166871	1.00131946669402	1.10746483723832	0.0505885472986169
CD27_P26842_OID21527_v1_Oncology	19553_14_STX1A_STX1a	44	MR Egger	0.0107752049862838	0.0349104334735004	1.0108334665797	0.943980995786122	1.08242041070606	0.75911143494886
CD27_P26842_OID21527_v1_Oncology	19553_14_STX1A_STX1a	44	Weighted median	0.0289618749090464	0.028942197871503	1.02938534831697	0.972617067425344	1.08946699664099	0.316981600671964
CD27_P26842_OID21527_v1_Oncology	19553_14_STX1A_STX1a	44	Inverse variance weighted	0.0550864578963554	0.0220829269033015	1.05663196490337	1.01187386236589	1.10336984754711	0.0126125122630855
CD27_P26842_OID21527_v1_Oncology	19553_14_STX1A_STX1a	44	Simple mode	0.0147912816119893	0.0602967947979254	1.01490121396256	0.901774819212699	1.14221915733014	0.80738503302512
CD27_P26842_OID21527_v1_Oncology	19553_14_STX1A_STX1a	44	Weighted mode	0.0313872460527495	0.0286749090066896	1.03188501992688	0.975489799560635	1.09154057257092	0.279790237191446
CD27_P26842_OID21527_v1_Oncology	2833_20_KLK4_Kallikrein_4	44	MR Egger	0.0447670938934923	0.0314382566531528	1.04578426200139	0.983289309669028	1.11225120815959	0.161843018770384
CD27_P26842_OID21527_v1_Oncology	2833_20_KLK4_Kallikrein_4	44	Weighted median	0.0181314077893744	0.0257326440679761	1.01829677972695	0.96821164450752	1.07097	0.481054680184521
CD27_P26842_OID21527_v1_Oncology	2833_20_KLK4_Kallikrein_4	44	Inverse variance weighted	0.0535761677443122	0.019330995458702	1.05503734852226	1.01581111012972	1.09577833484685	0.00557958899249255
CD27_P26842_OID21527_v1_Oncology	2833_20_KLK4_Kallikrein_4	44	Simple mode	0.0803888114527778	0.0438181163982059	1.08370834398674	0.994520371547047	1.18089463868857	0.0734893381809146
CD27_P26842_OID21527_v1_Oncology	2833_20_KLK4_Kallikrein_4	44	Weighted mode	0.0337014622331208	0.0236060781380245	1.03427579024896	0.987512177223415	1.0832538929321	0.16061224728935
CD27_P26842_OID21527_v1_Oncology	2997_8_JAM2_JAM_B	44	MR Egger	0.0631445382350191	0.0302755649076706	1.06518078745633	1.00381167704976	1.13030176467039	0.0431229413637122
CD27_P26842_OID21527_v1_Oncology	2997_8_JAM2_JAM_B	44	Weighted median	0.0654010381422906	0.0269433042150929	1.06758708168478	1.01267177697555	1.12548034110734	0.0152092501806661
CD27_P26842_OID21527_v1_Oncology	2997_8_JAM2_JAM_B	44	Inverse variance weighted	0.0623934606790104	0.018593318648569	1.06438105444213	1.02629020345729	1.10388565070474	0.000791665279132867
CD27_P26842_OID21527_v1_Oncology	2997_8_JAM2_JAM_B	44	Simple mode	0.0734935456794941	0.0505739027781951	1.07626159011222	0.97469438951936	1.18841251453401	0.153430201281202
CD27_P26842_OID21527_v1_Oncology	2997_8_JAM2_JAM_B	44	Weighted mode	0.0643694247027199	0.0253930071609922	1.06648631238522	1.01470621847028	1.12090872589674	0.0149670359856091
CD27_P26842_OID21527_v1_Oncology	5315_22_TNNT2_Troponin_T	44	MR Egger	0.0263081858623014	0.0338808549041177	1.02665730098885	0.960695008039649	1.09714863182697	0.441810201410486
CD27_P26842_OID21527_v1_Oncology	5315_22_TNNT2_Troponin_T	44	Weighted median	0.0224131819091359	0.0268588088694466	1.02266624437929	0.970222275752821	1.07794499624465	0.404009649406332
CD27_P26842_OID21527_v1_Oncology	5315_22_TNNT2_Troponin_T	44	Inverse variance weighted	0.0447908567876322	0.0208880966615173	1.04580911315737	1.00385760882396	1.08951378317918	0.0320068975181655
CD27_P26842_OID21527_v1_Oncology	5315_22_TNNT2_Troponin_T	44	Simple mode	0.0375049332477958	0.0467266506213833	1.0382171188515	0.94735697624823	1.13779157477158	0.42659388717904
CD27_P26842_OID21527_v1_Oncology	5315_22_TNNT2_Troponin_T	44	Weighted mode	0.0232624668263206	0.025531140530921	1.02353514831724	0.973576798117466	1.07605707312099	0.367300860593495
CD27_P26842_OID21527_v1_Oncology	5337_64_CD86_B7_2	44	MR Egger	0.00597931698862236	0.0474696472151469	1.00599722878676	0.916621004454182	1.10408818847575	0.900363967473244
CD27_P26842_OID21527_v1_Oncology	5337_64_CD86_B7_2	44	Weighted median	0.0408333067686581	0.0278403288894608	1.0416784503254	0.986360139668544	1.10009919321858	0.142458695755419
CD27_P26842_OID21527_v1_Oncology	5337_64_CD86_B7_2	44	Inverse variance weighted	0.0767347579179302	0.0303464884595687	1.07975564177247	1.01740537914094	1.14592695285718	0.0114511715526702
CD27_P26842_OID21527_v1_Oncology	5337_64_CD86_B7_2	44	Simple mode	0.0839979728786858	0.0462031693979356	1.08762668905535	0.993461232249385	1.19071764085561	0.0760330446932509
CD27_P26842_OID21527_v1_Oncology	5337_64_CD86_B7_2	44	Weighted mode	0.0404971958822699	0.0257353847044157	1.04132838969102	0.990105121518648	1.09520170293966	0.122909917053348
CD27_P26842_OID21527_v1_Oncology	6402_8_PILRA_PILRA_isoform_FDF03_deltaTM	44	MR Egger	0.0359433642325004	0.024060944148437	1.03659713635399	0.988846579490373	1.08665352683029	0.142691057546105
CD27_P26842_OID21527_v1_Oncology	6402_8_PILRA_PILRA_isoform_FDF03_deltaTM	44	Weighted median	0.0381524949457519	0.0199141505745877	1.03888964621982	0.999121146237948	1.08024107095186	0.0553843858954869
CD27_P26842_OID21527_v1_Oncology	6402_8_PILRA_PILRA_isoform_FDF03_deltaTM	44	Inverse variance weighted	0.0512577508188151	0.0148646716928037	1.0525941653294	1.02236952236244	1.08371234925439	0.000564140652221963
CD27_P26842_OID21527_v1_Oncology	6402_8_PILRA_PILRA_isoform_FDF03_deltaTM	44	Simple mode	0.0445475061038514	0.0409203472181605	1.04555464575824	0.964971825498733	1.13286677225176	0.282376896001643
CD27_P26842_OID21527_v1_Oncology	6402_8_PILRA_PILRA_isoform_FDF03_deltaTM	44	Weighted mode	0.0382987867136174	0.019364057237506	1.03904163834011	1.0003452941284	1.07923487273977	0.0543793732661809
CD27_P26842_OID21527_v1_Oncology	7009_8_CD72_CD72	44	MR Egger	0.0299670620114189	0.0417489033282312	1.03042059341281	0.949461033526472	1.11828349119881	0.476858823064528
CD27_P26842_OID21527_v1_Oncology	7009_8_CD72_CD72	44	Weighted median	0.0377765036935726	0.0265976736684843	1.03849910622527	0.985747604164885	1.09407356312508	0.155522245414389
CD27_P26842_OID21527_v1_Oncology	7009_8_CD72_CD72	44	Inverse variance weighted	0.0854452971070428	0.0264737109136174	1.0892019772152	1.03412620495089	1.14721098980935	0.00124854040718202
CD27_P26842_OID21527_v1_Oncology	7009_8_CD72_CD72	44	Simple mode	0.0604548810573982	0.0421151353969083	1.06231966574899	0.978151430207249	1.15373043210492	0.15838880731012
CD27_P26842_OID21527_v1_Oncology	7009_8_CD72_CD72	44	Weighted mode	0.0378089633974336	0.024026121624285	1.03853281614582	0.990760711973026	1.08860837655131	0.122895818807032
CD27_P26842_OID21527_v1_Oncology	7765_15_ITM2A_ITM2A	44	MR Egger	0.0316532605492925	0.0316930133307913	1.03215955281419	0.969994337065011	1.09830882692483	0.323637520018117
CD27_P26842_OID21527_v1_Oncology	7765_15_ITM2A_ITM2A	44	Weighted median	0.0448875197654819	0.0265507035713025	1.04591020906654	0.99287365445132	1.10177982921114	0.0909067441813539
CD27_P26842_OID21527_v1_Oncology	7765_15_ITM2A_ITM2A	44	Inverse variance weighted	0.0494341942034423	0.0195417138183955	1.05067644933918	1.01119463125912	1.0916998242182	0.0114168069197153
CD27_P26842_OID21527_v1_Oncology	7765_15_ITM2A_ITM2A	44	Simple mode	0.0290001818378697	0.0426270921793485	1.02942478166352	0.946912185885096	1.1191274089608	0.499946943419845
CD27_P26842_OID21527_v1_Oncology	7765_15_ITM2A_ITM2A	44	Weighted mode	0.0399846390724519	0.024853482362238	1.04079478649629	0.991309793681733	1.09275001064464	0.114975371863269
CD27_P26842_OID21527_v1_Oncology	7939_1_PQLC2L_CC055	44	MR Egger	-0.0129547	0.0335096655910586	0.987128852509141	0.924378514983042	1.05413892216425	0.701007192807199
CD27_P26842_OID21527_v1_Oncology	7939_1_PQLC2L_CC055	44	Weighted median	0.0175037538691887	0.0261420827136688	1.01765784229801	0.966827942763818	1.07116006704373	0.503136833084791
CD27_P26842_OID21527_v1_Oncology	7939_1_PQLC2L_CC055	44	Inverse variance weighted	0.0474347373035036	0.0217697977394424	1.04857776587569	1.00477730886023	1.09428758133092	0.0293373058894931
CD27_P26842_OID21527_v1_Oncology	7939_1_PQLC2L_CC055	44	Simple mode	0.0621396493278384	0.0449350882982655	1.06411093672947	0.974400251677558	1.16208106855248	0.17384245137676
CD27_P26842_OID21527_v1_Oncology	7939_1_PQLC2L_CC055	44	Weighted mode	0.0220598543853124	0.0252806828190921	1.02230497207495	0.972884135108058	1.07423630236615	0.387729353194982
CD27_P26842_OID21527_v1_Oncology	8253_2_POMGNT1_PMGT1	44	MR Egger	0.0171948308399206	0.0315959752092041	1.0173435129089	0.956252498943919	1.08233737888357	0.589174991669579
CD27_P26842_OID21527_v1_Oncology	8253_2_POMGNT1_PMGT1	44	Weighted median	0.0317027845932713	0.0253253578553276	1.03221067079506	0.982224956618263	1.08474017252777	0.210635530904222
CD27_P26842_OID21527_v1_Oncology	8253_2_POMGNT1_PMGT1	44	Inverse variance weighted	0.0385452728968337	0.0195682055095912	1.03929777931405	1.00019160845259	1.07993294980571	0.0488623413784811
CD27_P26842_OID21527_v1_Oncology	8253_2_POMGNT1_PMGT1	44	Simple mode	0.0346261573379114	0.0518080919722544	1.03523	0.935272168330905	1.14587669624429	0.507479558970725
CD27_P26842_OID21527_v1_Oncology	8253_2_POMGNT1_PMGT1	44	Weighted mode	0.0269399468569608	0.0251709389288609	1.02730610795038	0.977853815089092	1.07925931580683	0.290464447946637
CD27_P26842_OID21527_v1_Oncology	8363_18_KIAA1324L_K132L	44	MR Egger	0.00715781647125467	0.0296464932239076	1.0071834948701	0.950326841143811	1.06744179835834	0.810389863860549
CD27_P26842_OID21527_v1_Oncology	8363_18_KIAA1324L_K132L	44	Weighted median	0.0235866134541163	0.0259755941357441	1.02386697756175	0.973044414322751	1.07734402696414	0.363862479372048
CD27_P26842_OID21527_v1_Oncology	8363_18_KIAA1324L_K132L	44	Inverse variance weighted	0.0459079539078697	0.0187811181229497	1.04697803628476	1.00913846550453	1.08623647391606	0.0145106388877601
CD27_P26842_OID21527_v1_Oncology	8363_18_KIAA1324L_K132L	44	Simple mode	0.0423728747312738	0.0463639985023537	1.04328	0.952656803595002	1.14253138263205	0.365856465215528
CD27_P26842_OID21527_v1_Oncology	8363_18_KIAA1324L_K132L	44	Weighted mode	0.0264538784526414	0.0255974197828675	1.02680688824703	0.976561974898127	1.07963694353503	0.307166844347707
CD27_P26842_OID21527_v1_Oncology	9092_33_ANGPTL1_ANGL1	44	MR Egger	0.0598539960950314	0.0328099813707973	1.06168152558023	0.995556335033698	1.13219877378433	0.0752322176003609
CD27_P26842_OID21527_v1_Oncology	9092_33_ANGPTL1_ANGL1	44	Weighted median	0.0504538395778662	0.0292154242692815	1.05174831308835	0.993214732600631	1.11373	0.0841750289604633
CD27_P26842_OID21527_v1_Oncology	9092_33_ANGPTL1_ANGL1	44	Inverse variance weighted	0.0517592616692343	0.0201436800994182	1.05312218511716	1.01235332840878	1.09553285958884	0.010184428785643
CD27_P26842_OID21527_v1_Oncology	9092_33_ANGPTL1_ANGL1	44	Simple mode	0.0135817984135502	0.0510545105996405	1.01367445002093	0.917149267069071	1.12035840568125	0.791491058349186
CD27_P26842_OID21527_v1_Oncology	9092_33_ANGPTL1_ANGL1	44	Weighted mode	0.0384766147144715	0.0258254153482177	1.03922642546713	0.98793220760976	1.09318387949125	0.143556435431266
CD27_P26842_OID21527_v1_Oncology	9294_45_MFAP2_MFAP2	44	MR Egger	0.0260688656176579	0.0366004083947723	1.02641163051054	0.95535915101719	1.10274846284311	0.48024435284903
CD27_P26842_OID21527_v1_Oncology	9294_45_MFAP2_MFAP2	44	Weighted median	0.0139470377539471	0.0292081682058658	1.01404475142864	0.957623129009044	1.07379064555807	0.633002771008638
CD27_P26842_OID21527_v1_Oncology	9294_45_MFAP2_MFAP2	44	Inverse variance weighted	0.0534059665336279	0.0226529325060927	1.05485779516875	1.00904689683708	1.10274851596709	0.0183947846273114
CD27_P26842_OID21527_v1_Oncology	9294_45_MFAP2_MFAP2	44	Simple mode	0.0420545640835978	0.0591398589263262	1.04295138488479	0.928802126198812	1.17112952323309	0.480859838438142
CD27_P26842_OID21527_v1_Oncology	9294_45_MFAP2_MFAP2	44	Weighted mode	0.0103918556294495	0.0269427375052338	1.01044603848532	0.95847106007798	1.0652394623241	0.701619366447474
CD27_P26842_OID21527_v1_Oncology	9321_400_NMB_NMB	44	MR Egger	0.00568780611901783	0.0271953603301653	1.00570401239973	0.953500718761498	1.06076538869387	0.835345233256334
CD27_P26842_OID21527_v1_Oncology	9321_400_NMB_NMB	44	Weighted median	0.0202297149386543	0.0249905846168197	1.02043572243453	0.971657569922523	1.07166258551716	0.418231360160034
CD27_P26842_OID21527_v1_Oncology	9321_400_NMB_NMB	44	Inverse variance weighted	0.0642821174481858	0.0170535818530801	1.06639320445785	1.03133811206183	1.10263981638419	0.000163627153988069
CD27_P26842_OID21527_v1_Oncology	9321_400_NMB_NMB	44	Simple mode	0.0396346184132477	0.0495612120913909	1.04043055056779	0.9441168324691	1.14656967583535	0.428274446018013
CD27_P26842_OID21527_v1_Oncology	9321_400_NMB_NMB	44	Weighted mode	0.0252628080536305	0.0258855758784388	1.02558461700698	0.974848776861892	1.07896099539383	0.334552191117223
CD27_P26842_OID21527_v1_Oncology	9931_20_KRT1_Keratin_1	44	MR Egger	0.0072941126153159	0.0299774476269298	1.00732077945228	0.949840042639395	1.0682800336536	0.808942032955254
CD27_P26842_OID21527_v1_Oncology	9931_20_KRT1_Keratin_1	44	Weighted median	0.0153282687228326	0.0264268990885556	1.01544634918543	0.964188510198326	1.06942913877071	0.561897591042295
CD27_P26842_OID21527_v1_Oncology	9931_20_KRT1_Keratin_1	44	Inverse variance weighted	0.0496155857379336	0.0190578999009309	1.05086705043876	1.01233758973484	1.09086293830808	0.00923006708755407
CD27_P26842_OID21527_v1_Oncology	9931_20_KRT1_Keratin_1	44	Simple mode	0.00894013352886897	0.0482294419103519	1.00898021588078	0.917970914315817	1.10901234468587	0.853813019686671
CD27_P26842_OID21527_v1_Oncology	9931_20_KRT1_Keratin_1	44	Weighted mode	0.017900152910178	0.0248105352034514	1.01806132085473	0.969738825221512	1.06879174687444	0.474522914022151
CD302_Q8IX05_OID21328_v1_Oncology	10851_77_EBI3_IL27B	95	MR Egger	0.00031868018051675	0.0256084637256626	1.00031873096444	0.951349373796849	1.05180871620775	0.990097774206753
CD302_Q8IX05_OID21328_v1_Oncology	10851_77_EBI3_IL27B	95	Weighted median	0.0141742679006651	0.0181489091331675	1.01427519914762	0.978829710371819	1.05100424384868	0.434803471206073
CD302_Q8IX05_OID21328_v1_Oncology	10851_77_EBI3_IL27B	95	Inverse variance weighted	0.0430002808634387	0.0145226431196318	1.04393818805464	1.01464206030159	1.0740801935166	0.00306728703196757
CD302_Q8IX05_OID21328_v1_Oncology	10851_77_EBI3_IL27B	95	Simple mode	0.0302267327904232	0.0357428097241277	1.03068819827408	0.960953580730134	1.10548332756545	0.399882681093013
CD302_Q8IX05_OID21328_v1_Oncology	10851_77_EBI3_IL27B	95	Weighted mode	0.00874646321118533	0.0209189820092683	1.00878482528312	0.968259894655688	1.05100586044966	0.676819355711017
CD302_Q8IX05_OID21328_v1_Oncology	10916_44_PLA2R1_PLA2R	95	MR Egger	0.912171580600863	0.348166248268402	2.48972330198437	1.25830519726664	4.92624693429634	0.0102711884860234
CD302_Q8IX05_OID21328_v1_Oncology	10916_44_PLA2R1_PLA2R	95	Weighted median	0.0338059461737088	0.025391957194761	1.03438386110492	0.984164432267107	1.08716586073894	0.183069159120812
CD302_Q8IX05_OID21328_v1_Oncology	10916_44_PLA2R1_PLA2R	95	Inverse variance weighted	0.917108210526417	0.185851285588431	2.50204453219751	1.73818191542998	3.6015947384603	8.03008940298696e-07
CD302_Q8IX05_OID21328_v1_Oncology	10916_44_PLA2R1_PLA2R	95	Simple mode	0.00491724122090531	0.0360082784901127	1.00492935069178	0.936450153752516	1.07841618246847	0.891671724956555
CD302_Q8IX05_OID21328_v1_Oncology	10916_44_PLA2R1_PLA2R	95	Weighted mode	0.0343592220784377	0.0263241069976467	1.03495631912052	0.982911662937087	1.08975671250739	0.194997776174609
CD302_Q8IX05_OID21328_v1_Oncology	11441_11_PYGL_PYGL	95	MR Egger	-0.00527432	0.0232323326948941	0.994739560105365	0.950459528807488	1.04108251056215	0.820902455752969
CD302_Q8IX05_OID21328_v1_Oncology	11441_11_PYGL_PYGL	95	Weighted median	-0.0267883	0.0215902036150373	0.973567314027321	0.933228583976848	1.01564968242109	0.214693581284835
CD302_Q8IX05_OID21328_v1_Oncology	11441_11_PYGL_PYGL	95	Inverse variance weighted	-0.0471965	0.0132489940783944	0.953899943881829	0.929447902767322	0.978995272600606	0.000367662022486126
CD302_Q8IX05_OID21328_v1_Oncology	11441_11_PYGL_PYGL	95	Simple mode	-0.0260094	0.0445264188985069	0.974325973910416	0.892899597801905	1.0631778822316	0.560529977004602
CD302_Q8IX05_OID21328_v1_Oncology	11441_11_PYGL_PYGL	95	Weighted mode	-0.0260094	0.0222932576001334	0.974325973910416	0.93266971804951	1.01784274225368	0.246286278634022
CD302_Q8IX05_OID21328_v1_Oncology	12560_9_NT5C_NT5C	95	MR Egger	-0.0147187	0.0238892172894996	0.985389106278141	0.940313874935592	1.03262508046916	0.539318804658586
CD302_Q8IX05_OID21328_v1_Oncology	12560_9_NT5C_NT5C	95	Weighted median	-0.0340505	0.0201783647374722	0.966522687757587	0.92904314266079	1.00551423615774	0.091511858548381
CD302_Q8IX05_OID21328_v1_Oncology	12560_9_NT5C_NT5C	95	Inverse variance weighted	-0.0441096	0.0133819662140948	0.956849038988471	0.932078446517597	0.982277926105735	0.000980020395509242
CD302_Q8IX05_OID21328_v1_Oncology	12560_9_NT5C_NT5C	95	Simple mode	-0.084668	0.0469761415975253	0.918817237757386	0.837996559002763	1.00743267657896	0.0746933379487069
CD302_Q8IX05_OID21328_v1_Oncology	12560_9_NT5C_NT5C	95	Weighted mode	-0.029549	0.0227642833648955	0.970883309606389	0.928516629025982	1.0151831118642	0.197448922978282
CD302_Q8IX05_OID21328_v1_Oncology	16845_15_MPZL1_MPZL1	95	MR Egger	0.0633069519737679	0.0350620556050741	1.06535380150001	0.9945999559286	1.14114093370421	0.0742211976215903
CD302_Q8IX05_OID21328_v1_Oncology	16845_15_MPZL1_MPZL1	95	Weighted median	0.00841142483603054	0.0212886842622797	1.00844690026646	0.967234416841523	1.05141538902008	0.692759878903338
CD302_Q8IX05_OID21328_v1_Oncology	16845_15_MPZL1_MPZL1	95	Inverse variance weighted	-0.0437543	0.0207254589922782	0.957189104421745	0.919085426149146	0.996872494717398	0.0347604448823031
CD302_Q8IX05_OID21328_v1_Oncology	16845_15_MPZL1_MPZL1	95	Simple mode	-0.0349177	0.0500785636927581	0.965684861099613	0.875402311625742	1.06527848804181	0.4873616671038
CD302_Q8IX05_OID21328_v1_Oncology	16845_15_MPZL1_MPZL1	95	Weighted mode	0.010723250608375	0.0211267583967623	1.01078	0.96978081605381	1.05351447814342	0.612945717091254
CD302_Q8IX05_OID21328_v1_Oncology	16900_29_MDGA1_MDGA1	95	MR Egger	0.0578107294959731	0.0437596052903218	1.05951444189898	0.972429113768125	1.1543986463369	0.189709967010988
CD302_Q8IX05_OID21328_v1_Oncology	16900_29_MDGA1_MDGA1	95	Weighted median	0.00788996741190284	0.0202256039027854	1.00792	0.968746592018111	1.04867991675164	0.696464089706675
CD302_Q8IX05_OID21328_v1_Oncology	16900_29_MDGA1_MDGA1	95	Inverse variance weighted	-0.0543343	0.025985328016232	0.947115393088471	0.900085441711455	0.996602684873438	0.0365314409168521
CD302_Q8IX05_OID21328_v1_Oncology	16900_29_MDGA1_MDGA1	95	Simple mode	-0.054118	0.0352828309331206	0.94732035800407	0.884022906452089	1.01515000814925	0.12842981942182
CD302_Q8IX05_OID21328_v1_Oncology	16900_29_MDGA1_MDGA1	95	Weighted mode	0.00121145373379772	0.0214483270726569	1.00121218784029	0.959994938117325	1.04419909447213	0.95507737449798
CD302_Q8IX05_OID21328_v1_Oncology	17712_7_IDI1_IDI1	95	MR Egger	0.0460207099221449	0.0255448432666506	1.04709609601102	0.995960995926714	1.10085659856723	0.0748542475383423
CD302_Q8IX05_OID21328_v1_Oncology	17712_7_IDI1_IDI1	95	Weighted median	0.00637638299903859	0.0215395923255611	1.00639675540685	0.964793473198466	1.04979403098128	0.767206551085824
CD302_Q8IX05_OID21328_v1_Oncology	17712_7_IDI1_IDI1	95	Inverse variance weighted	-0.0356978	0.0152640006679799	0.964931877067779	0.936491142570198	0.994236341441696	0.0193514555076144
CD302_Q8IX05_OID21328_v1_Oncology	17712_7_IDI1_IDI1	95	Simple mode	0.0221267517717817	0.0474740699208306	1.02237336389335	0.931534152832308	1.12207082480074	0.64223591503499
CD302_Q8IX05_OID21328_v1_Oncology	17712_7_IDI1_IDI1	95	Weighted mode	0.0066980399838511	0.0235289468118655	1.00672052202083	0.961348112483789	1.05423435725004	0.776521404645461
CD302_Q8IX05_OID21328_v1_Oncology	19277_4_TSTD1_KAT	95	MR Egger	0.00291985716678052	0.0252374769591752	1.00292412410165	0.954521035639412	1.05378169903953	0.908143490794495
CD302_Q8IX05_OID21328_v1_Oncology	19277_4_TSTD1_KAT	95	Weighted median	-0.0333406	0.0223794468072545	0.96720909306199	0.925700719148711	1.01057870038396	0.136280610286333
CD302_Q8IX05_OID21328_v1_Oncology	19277_4_TSTD1_KAT	95	Inverse variance weighted	-0.0490591	0.0144087214323799	0.952124885275155	0.925611975779564	0.979397221386127	0.000662082192860271
CD302_Q8IX05_OID21328_v1_Oncology	19277_4_TSTD1_KAT	95	Simple mode	-0.0319268	0.0431626566464421	0.968577503183652	0.890007328138676	1.05408388224788	0.461334387114671
CD302_Q8IX05_OID21328_v1_Oncology	19277_4_TSTD1_KAT	95	Weighted mode	-0.047607	0.0232238483757514	0.953508394776653	0.911078886081627	0.99791387200262	0.0431573425402063
CD302_Q8IX05_OID21328_v1_Oncology	2516_57_CCL21_6Ckine	95	MR Egger	-0.0775551	0.0331404691238367	0.925375997800828	0.867178484047214	0.987479224933416	0.0214121734033447
CD302_Q8IX05_OID21328_v1_Oncology	2516_57_CCL21_6Ckine	95	Weighted median	-0.0210399	0.0219380113942406	0.979179869049922	0.937968954251633	1.02220144025727	0.337527215595696
CD302_Q8IX05_OID21328_v1_Oncology	2516_57_CCL21_6Ckine	95	Inverse variance weighted	0.0530593393107348	0.0204176241847727	1.05449221610416	1.0131261979205	1.09754721189385	0.00935767228632535
CD302_Q8IX05_OID21328_v1_Oncology	2516_57_CCL21_6Ckine	95	Simple mode	-0.0356685	0.0404754156722164	0.96496010066998	0.89136584113524	1.04463055786288	0.380436064743734
CD302_Q8IX05_OID21328_v1_Oncology	2516_57_CCL21_6Ckine	95	Weighted mode	-0.0219713	0.0202151915802508	0.978268292800756	0.940265408551322	1.01780714678612	0.279872709242389
CD302_Q8IX05_OID21328_v1_Oncology	3327_27_NTN4_NET4	95	MR Egger	-0.0588897	0.026787401463207	0.942810710501904	0.894587058311316	0.993633909163674	0.0304010949610254
CD302_Q8IX05_OID21328_v1_Oncology	3327_27_NTN4_NET4	95	Weighted median	-0.0552268	0.023376775106748	0.946270509057203	0.903892104052069	0.990635798561856	0.0181538818952278
CD302_Q8IX05_OID21328_v1_Oncology	3327_27_NTN4_NET4	95	Inverse variance weighted	-0.0499506	0.0148520738348637	0.95127642189633	0.923983874869004	0.979375133558666	0.000770426549178407
CD302_Q8IX05_OID21328_v1_Oncology	3327_27_NTN4_NET4	95	Simple mode	-0.0225145	0.0444628757261524	0.977737011432023	0.896137170186897	1.06676711482088	0.613784392359659
CD302_Q8IX05_OID21328_v1_Oncology	3327_27_NTN4_NET4	95	Weighted mode	-0.0536665	0.0231006372491804	0.947748131861223	0.905793662260639	0.991645844821529	0.0223270779396234
CD302_Q8IX05_OID21328_v1_Oncology	3432_21_EPHA3_EPHA3	95	MR Egger	0.0337042608281244	0.0278909899781696	1.03427868477207	0.979256097717771	1.09239288911954	0.2299462715461
CD302_Q8IX05_OID21328_v1_Oncology	3432_21_EPHA3_EPHA3	95	Weighted median	-0.012796	0.0208621737068686	0.987285507968697	0.947729766890948	1.02849220136099	0.539638643626018
CD302_Q8IX05_OID21328_v1_Oncology	3432_21_EPHA3_EPHA3	95	Inverse variance weighted	-0.0402316	0.0162653191280638	0.960566954331213	0.930427038628702	0.991683211520847	0.0133812354520243
CD302_Q8IX05_OID21328_v1_Oncology	3432_21_EPHA3_EPHA3	95	Simple mode	-0.0706396	0.0539946174513246	0.931797684673548	0.838224751485209	1.03581637696165	0.193971616454634
CD302_Q8IX05_OID21328_v1_Oncology	3432_21_EPHA3_EPHA3	95	Weighted mode	-0.00573363	0.0232065807181993	0.994282773742437	0.950071028477546	1.04055192141281	0.805393453463168
CD302_Q8IX05_OID21328_v1_Oncology	4931_59_F3_TF	95	MR Egger	0.0120203974646065	0.0311724335123294	1.01209293278531	0.952107269759629	1.07585787560742	0.700666269313325
CD302_Q8IX05_OID21328_v1_Oncology	4931_59_F3_TF	95	Weighted median	-0.0327222	0.0235752106562546	0.967807343623563	0.924104933326483	1.01357651127351	0.16513905613704
CD302_Q8IX05_OID21328_v1_Oncology	4931_59_F3_TF	95	Inverse variance weighted	-0.0528695	0.0178205303443918	0.948503826145146	0.915946158285652	0.982218769164168	0.00300943746705285
CD302_Q8IX05_OID21328_v1_Oncology	4931_59_F3_TF	95	Simple mode	-0.0433038	0.0463421389445279	0.957620396428597	0.874472512059801	1.04867427049937	0.352472586616871
CD302_Q8IX05_OID21328_v1_Oncology	4931_59_F3_TF	95	Weighted mode	-0.012125	0.0241895070814548	0.987948224964882	0.942201217650551	1.03591640185426	0.617367148916181
CD302_Q8IX05_OID21328_v1_Oncology	5005_4_MAPK12_MK12	95	MR Egger	-0.00330223	0.0244578231669957	0.996703217497367	0.950051046882153	1.04564623872556	0.89289000129848
CD302_Q8IX05_OID21328_v1_Oncology	5005_4_MAPK12_MK12	95	Weighted median	-0.0409387	0.0208034754716158	0.959887934975554	0.921535897006612	0.99983608962443	0.0490818884291533
CD302_Q8IX05_OID21328_v1_Oncology	5005_4_MAPK12_MK12	95	Inverse variance weighted	-0.0535927	0.0139438156548194	0.947818069313725	0.922265086907813	0.974079042208604	0.000121304422664734
CD302_Q8IX05_OID21328_v1_Oncology	5005_4_MAPK12_MK12	95	Simple mode	-0.0549217	0.0415725017987615	0.94655923625814	0.872490224232706	1.02691624829784	0.189672589788703
CD302_Q8IX05_OID21328_v1_Oncology	5005_4_MAPK12_MK12	95	Weighted mode	-0.0465435	0.0230850163851611	0.954523029349878	0.912296583025888	0.998703963723401	0.0466352640317429
CD302_Q8IX05_OID21328_v1_Oncology	5491_12_SPOCK2_Testican_2	95	MR Egger	0.0707915066045062	0.0417286560530102	1.07335741460563	0.989063582974723	1.16483526369844	0.0931413619628789
CD302_Q8IX05_OID21328_v1_Oncology	5491_12_SPOCK2_Testican_2	95	Weighted median	0.0179799337038626	0.0222153375563169	1.01814254583498	0.974761817173417	1.06345388727399	0.418315141347992
CD302_Q8IX05_OID21328_v1_Oncology	5491_12_SPOCK2_Testican_2	95	Inverse variance weighted	-0.0587448	0.0248176408980789	0.942947400298769	0.89817769361772	0.989948654980341	0.0179301586068768
CD302_Q8IX05_OID21328_v1_Oncology	5491_12_SPOCK2_Testican_2	95	Simple mode	-0.0049291	0.0393914498547615	0.995083027019841	0.921146358479722	1.07495429097413	0.900686872598883
CD302_Q8IX05_OID21328_v1_Oncology	5491_12_SPOCK2_Testican_2	95	Weighted mode	0.0180772584689946	0.0214045989680635	1.01824164114126	0.976407015415189	1.06186869142185	0.400506383995144
CD302_Q8IX05_OID21328_v1_Oncology	6119_14_MAMDC2_MAMC2	95	MR Egger	0.0468832638046996	0.026729172547533	1.04799966244538	0.994509215377693	1.10436713456549	0.0827228403582091
CD302_Q8IX05_OID21328_v1_Oncology	6119_14_MAMDC2_MAMC2	95	Weighted median	0.00710533550203091	0.0218118914857227	1.0071306382911	0.964981863799433	1.05112039991194	0.744609631077967
CD302_Q8IX05_OID21328_v1_Oncology	6119_14_MAMDC2_MAMC2	95	Inverse variance weighted	-0.0310241	0.0157060611183102	0.969452210146193	0.940063381742368	0.999759809828342	0.0482347177562241
CD302_Q8IX05_OID21328_v1_Oncology	6119_14_MAMDC2_MAMC2	95	Simple mode	-0.0156301	0.0422878164283513	0.984491378052496	0.906182771413708	1.06956709400649	0.712502025163828
CD302_Q8IX05_OID21328_v1_Oncology	6119_14_MAMDC2_MAMC2	95	Weighted mode	0.00600775806369702	0.0213883102384118	1.00602584083634	0.964723902477039	1.04909600542893	0.779412255884152
CD302_Q8IX05_OID21328_v1_Oncology	9343_16_IL2RB_IL_2_sRb	95	MR Egger	-0.00711811	0.035806165256387	0.992907168504386	0.925613804497837	1.06509285025437	0.842856657987347
CD302_Q8IX05_OID21328_v1_Oncology	9343_16_IL2RB_IL_2_sRb	95	Weighted median	0.0257572589881148	0.0235741358483566	1.02609184366827	0.979759596333517	1.07461511536361	0.274566515763549
CD302_Q8IX05_OID21328_v1_Oncology	9343_16_IL2RB_IL_2_sRb	95	Inverse variance weighted	0.0933566749197033	0.0209835282684489	1.09785324216058	1.05361695052333	1.14394680222621	8.62526888609039e-06
CD302_Q8IX05_OID21328_v1_Oncology	9343_16_IL2RB_IL_2_sRb	95	Simple mode	0.0906634851738838	0.0512901994626021	1.09490049300801	0.990183196727808	1.21069221690571	0.080363209105112
CD302_Q8IX05_OID21328_v1_Oncology	9343_16_IL2RB_IL_2_sRb	95	Weighted mode	0.0306942158703826	0.0235411038053773	1.03117014020856	0.984672335380197	1.07986364585656	0.195466626137661
CD302_Q8IX05_OID21328_v1_Oncology	9369_174_LRRC4C_NGL1	95	MR Egger	-0.00655471	0.0233726922026671	0.993466723120536	0.948982245808529	1.04003645411401	0.779760409002428
CD302_Q8IX05_OID21328_v1_Oncology	9369_174_LRRC4C_NGL1	95	Weighted median	-0.0332642	0.021264900697436	0.967282955990832	0.927795979999094	1.00845049679055	0.117752320570393
CD302_Q8IX05_OID21328_v1_Oncology	9369_174_LRRC4C_NGL1	95	Inverse variance weighted	-0.0344048	0.0130692191999091	0.966180300730354	0.941745241642162	0.991249365796216	0.00847571916724862
CD302_Q8IX05_OID21328_v1_Oncology	9369_174_LRRC4C_NGL1	95	Simple mode	-0.0576646	0.0450686248217486	0.943966524119033	0.864158498335953	1.03114509707796	0.203875898036346
CD302_Q8IX05_OID21328_v1_Oncology	9369_174_LRRC4C_NGL1	95	Weighted mode	-0.0338131	0.0221949214850203	0.96675213814301	0.925598074917159	1.00973599873544	0.131000266755361
CEACAM6_P40199_OID30362_v1_Cardiometabolic_II	15305_7_SCGN_Secretagogin	60	MR Egger	-0.0853456	0.0814646535731636	0.918194897840201	0.782691760785744	1.07715695074317	0.299150858923131
CEACAM6_P40199_OID30362_v1_Cardiometabolic_II	15305_7_SCGN_Secretagogin	60	Weighted median	-0.0249176	0.0278096311002228	0.975390233549424	0.92364772920941	1.03003133945658	0.370248556280226
CEACAM6_P40199_OID30362_v1_Cardiometabolic_II	15305_7_SCGN_Secretagogin	60	Inverse variance weighted	-0.093916	0.0392435645376691	0.910359234021874	0.842962015088943	0.983145052961194	0.0167041106981375
CEACAM6_P40199_OID30362_v1_Cardiometabolic_II	15305_7_SCGN_Secretagogin	60	Simple mode	-0.0147822	0.0551459897945822	0.985326553798454	0.884380122402574	1.09779538574748	0.789591837484533
CEACAM6_P40199_OID30362_v1_Cardiometabolic_II	15305_7_SCGN_Secretagogin	60	Weighted mode	-0.035563	0.0395303056634884	0.965061900142819	0.893112761344512	1.04280725952813	0.371969273842014
CEACAM6_P40199_OID30362_v1_Cardiometabolic_II	17231_1_LCP1_L_plastin	60	MR Egger	0.0162293797365819	0.0410487529651932	1.01636179147017	0.937792869231724	1.10151327126929	0.694021483433639
CEACAM6_P40199_OID30362_v1_Cardiometabolic_II	17231_1_LCP1_L_plastin	60	Weighted median	0.0557191279265073	0.0276792935609439	1.05730067579483	1.00146879016426	1.11624518908157	0.0441119309454482
CEACAM6_P40199_OID30362_v1_Cardiometabolic_II	17231_1_LCP1_L_plastin	60	Inverse variance weighted	0.0471267125184487	0.0199008629068284	1.04825482767378	1.00815408616032	1.08995063237451	0.01788096760219
CEACAM6_P40199_OID30362_v1_Cardiometabolic_II	17231_1_LCP1_L_plastin	60	Simple mode	0.119116842295987	0.0610215845529504	1.12650153362471	0.999514654390507	1.26962191067888	0.0556839040404811
CEACAM6_P40199_OID30362_v1_Cardiometabolic_II	17231_1_LCP1_L_plastin	60	Weighted mode	0.0488968742996697	0.0402631823693832	1.05011205161516	0.970427131024285	1.13634015959908	0.229421428601109
CEACAM6_P40199_OID30362_v1_Cardiometabolic_II	19277_4_TSTD1_KAT	60	MR Egger	0.0241216516249249	0.0385234859514898	1.02441493205179	0.94991347181101	1.10475952194882	0.533670219906262
CEACAM6_P40199_OID30362_v1_Cardiometabolic_II	19277_4_TSTD1_KAT	60	Weighted median	0.0620937227552847	0.0275579253910926	1.06406206688355	1.00811292181888	1.12311632722421	0.0242460719882695
CEACAM6_P40199_OID30362_v1_Cardiometabolic_II	19277_4_TSTD1_KAT	60	Inverse variance weighted	0.043059163962913	0.0187028033260462	1.04399966018063	1.00642220392463	1.08298017095308	0.0213191642103911
CEACAM6_P40199_OID30362_v1_Cardiometabolic_II	19277_4_TSTD1_KAT	60	Simple mode	0.0903056633020878	0.060847697288718	1.09450878374942	0.971459379306836	1.23314417794741	0.143098527940492
CEACAM6_P40199_OID30362_v1_Cardiometabolic_II	19277_4_TSTD1_KAT	60	Weighted mode	0.0248491568880278	0.0475697512115575	1.02516047046514	0.933898465958293	1.12534073939815	0.60336656789487
CEACAM6_P40199_OID30362_v1_Cardiometabolic_II	3181_50_CTSS_Cathepsin_S	60	MR Egger	0.0809300522908673	0.0567598277791066	1.08429504995937	0.970135806914752	1.21188780682715	0.159276633422697
CEACAM6_P40199_OID30362_v1_Cardiometabolic_II	3181_50_CTSS_Cathepsin_S	60	Weighted median	0.055889196269032	0.0288268903655631	1.05748050445946	0.999388678085958	1.11894905539009	0.0525272967289806
CEACAM6_P40199_OID30362_v1_Cardiometabolic_II	3181_50_CTSS_Cathepsin_S	60	Inverse variance weighted	0.0655775209473916	0.0273804334624622	1.06777550907425	1.01198310024275	1.12664385156756	0.0166180761332845
CEACAM6_P40199_OID30362_v1_Cardiometabolic_II	3181_50_CTSS_Cathepsin_S	60	Simple mode	0.0732310886863844	0.0611930249104287	1.07597915479667	0.954366756975785	1.21308829451016	0.236201315210436
CEACAM6_P40199_OID30362_v1_Cardiometabolic_II	3181_50_CTSS_Cathepsin_S	60	Weighted mode	0.0440747727002385	0.0354230921301343	1.04506049396212	0.97496423776261	1.12019640694377	0.218332222394528
CEACAM6_P40199_OID30362_v1_Cardiometabolic_II	3432_21_EPHA3_EPHA3	60	MR Egger	0.0308338203368782	0.0371682378041523	1.03131410621477	0.958854509964795	1.10924939563211	0.410180811422162
CEACAM6_P40199_OID30362_v1_Cardiometabolic_II	3432_21_EPHA3_EPHA3	60	Weighted median	0.0221714166455469	0.0257164210405615	1.0224190290904	0.972162051668879	1.07527409576587	0.388604889123438
CEACAM6_P40199_OID30362_v1_Cardiometabolic_II	3432_21_EPHA3_EPHA3	60	Inverse variance weighted	0.0352530344889648	0.0179552970765834	1.03588178945973	1.00006065405824	1.0729860007789	0.0496022732044565
CEACAM6_P40199_OID30362_v1_Cardiometabolic_II	3432_21_EPHA3_EPHA3	60	Simple mode	0.0498725143882081	0.0579425662722073	1.05113708297971	0.938291213969594	1.17755463417449	0.392874852917926
CEACAM6_P40199_OID30362_v1_Cardiometabolic_II	3432_21_EPHA3_EPHA3	60	Weighted mode	0.00246546451148821	0.0329373951929198	1.00246850626838	0.939796581245749	1.06931981464315	0.940584855044239
CEACAM6_P40199_OID30362_v1_Cardiometabolic_II	5337_64_CD86_B7_2	60	MR Egger	0.154945627562727	0.0688656284868932	1.16759447442186	1.02016970991768	1.33632359738505	0.0282599093896336
CEACAM6_P40199_OID30362_v1_Cardiometabolic_II	5337_64_CD86_B7_2	60	Weighted median	0.074803107539142	0.0336455048068278	1.07767194451325	1.00889726556747	1.15113486737198	0.0261974668356095
CEACAM6_P40199_OID30362_v1_Cardiometabolic_II	5337_64_CD86_B7_2	60	Inverse variance weighted	0.137103364019185	0.0332920327303007	1.14694669541378	1.07449521071421	1.22428346725361	3.81837527270584e-05
CEACAM6_P40199_OID30362_v1_Cardiometabolic_II	5337_64_CD86_B7_2	60	Simple mode	0.200026626299851	0.0806522397915125	1.22143528002921	1.04284049607987	1.43061585056224	0.0160075832397807
CEACAM6_P40199_OID30362_v1_Cardiometabolic_II	5337_64_CD86_B7_2	60	Weighted mode	0.0255994162805553	0.045606934373116	1.02592989533498	0.938201836994609	1.12186110561633	0.576715256863153
CEACAM6_P40199_OID30362_v1_Cardiometabolic_II	9343_16_IL2RB_IL_2_sRb	60	MR Egger	0.0488559768452795	0.0585582358625902	1.05006910558363	0.936207475278618	1.17777859675073	0.407527077659281
CEACAM6_P40199_OID30362_v1_Cardiometabolic_II	9343_16_IL2RB_IL_2_sRb	60	Weighted median	0.0126696070001182	0.0301091555513552	1.01275020649919	0.954713161678114	1.07431532520337	0.673909030262576
CEACAM6_P40199_OID30362_v1_Cardiometabolic_II	9343_16_IL2RB_IL_2_sRb	60	Inverse variance weighted	0.0571929459080498	0.0282624368863166	1.0588600934093	1.00180018800731	1.11916998103675	0.0430073952012077
CEACAM6_P40199_OID30362_v1_Cardiometabolic_II	9343_16_IL2RB_IL_2_sRb	60	Simple mode	0.00782002983362273	0.0588468412380297	1.00785068612586	0.898058759577294	1.13106519444504	0.894734279890298
CEACAM6_P40199_OID30362_v1_Cardiometabolic_II	9343_16_IL2RB_IL_2_sRb	60	Weighted mode	-0.025242	0.0352057814932332	0.975073891291757	0.910059445715831	1.04473295448409	0.476212136633516
CES1_P23141_OID20244_v1_Cardiometabolic	11308_8_CREB3L4_CR3L4	57	MR Egger	-0.0294861	0.0474516075117368	0.970944335376712	0.884713610618134	1.0655797436432	0.536907605202466
CES1_P23141_OID20244_v1_Cardiometabolic	11308_8_CREB3L4_CR3L4	57	Weighted median	-0.00815354	0.0190305624700987	0.99187961374881	0.95556409392757	1.02957527854229	0.668327671952448
CES1_P23141_OID20244_v1_Cardiometabolic	11308_8_CREB3L4_CR3L4	57	Inverse variance weighted	0.0702893643784631	0.0353720692980874	1.0728185718233	1.00096056960597	1.14983519131234	0.0469065382554297
CES1_P23141_OID20244_v1_Cardiometabolic	11308_8_CREB3L4_CR3L4	57	Simple mode	-0.0122276	0.0452188139295999	0.987846832363761	0.90406275972401	1.07939559916064	0.787838939996106
CES1_P23141_OID20244_v1_Cardiometabolic	11308_8_CREB3L4_CR3L4	57	Weighted mode	-0.0217029	0.0143960021505442	0.978530905455229	0.951306408389665	1.00653451347173	0.137286997942873
CES1_P23141_OID20244_v1_Cardiometabolic	19361_78_MATN3_MATN3	57	MR Egger	-0.0219015	0.0187835331370106	0.978336624844215	0.942973408164195	1.01502602642312	0.248648656153268
CES1_P23141_OID20244_v1_Cardiometabolic	19361_78_MATN3_MATN3	57	Weighted median	-0.00592281	0.0160670985902221	0.994094696616027	0.963276945948166	1.02589838778648	0.712403805695501
CES1_P23141_OID20244_v1_Cardiometabolic	19361_78_MATN3_MATN3	57	Inverse variance weighted	-0.0268747	0.0130160337136605	0.97348317642276	0.948962342943131	0.998637619106177	0.0389475319753616
CES1_P23141_OID20244_v1_Cardiometabolic	19361_78_MATN3_MATN3	57	Simple mode	-0.0208018	0.0338427270922914	0.979413090404663	0.916554709843147	1.04658237130239	0.541268732044544
CES1_P23141_OID20244_v1_Cardiometabolic	19361_78_MATN3_MATN3	57	Weighted mode	-0.00629492	0.013212705731318	0.993724847025601	0.96832081347211	1.0197953589939	0.635622060875421
CES1_P23141_OID20244_v1_Cardiometabolic	3580_25_SERPINA1_a1_Antitrypsin	57	MR Egger	-0.00886463	0.029719451406111	0.991174546423419	0.935087890749554	1.05062528474213	0.766615732535122
CES1_P23141_OID20244_v1_Cardiometabolic	3580_25_SERPINA1_a1_Antitrypsin	57	Weighted median	-0.0182105	0.0190772405583803	0.981954273885747	0.945915603965283	1.01936598990482	0.339795871524051
CES1_P23141_OID20244_v1_Cardiometabolic	3580_25_SERPINA1_a1_Antitrypsin	57	Inverse variance weighted	-0.0504321	0.0212807287697786	0.950818464434203	0.91197531862929	0.99131602998623	0.0177953287341005
CES1_P23141_OID20244_v1_Cardiometabolic	3580_25_SERPINA1_a1_Antitrypsin	57	Simple mode	-0.0276003	0.0373016952250692	0.97277705998516	0.9041936995586	1.04656248865185	0.462438051244457
CES1_P23141_OID20244_v1_Cardiometabolic	3580_25_SERPINA1_a1_Antitrypsin	57	Weighted mode	-0.011449	0.0151610421249132	0.98861633649858	0.959671158982091	1.0184345456714	0.45331976970144
CES1_P23141_OID20244_v1_Cardiometabolic	5337_64_CD86_B7_2	57	MR Egger	-0.0439809	0.0192032234503689	0.956972195307722	0.921622790631054	0.993677447977406	0.0258630913558989
CES1_P23141_OID20244_v1_Cardiometabolic	5337_64_CD86_B7_2	57	Weighted median	-0.0430561	0.0195655427488832	0.957857668340636	0.921820695738614	0.995303443544208	0.0277638091382066
CES1_P23141_OID20244_v1_Cardiometabolic	5337_64_CD86_B7_2	57	Inverse variance weighted	-0.0269997	0.0135035825055721	0.973361543670893	0.947937496089943	0.999467473968862	0.0455600745440546
CES1_P23141_OID20244_v1_Cardiometabolic	5337_64_CD86_B7_2	57	Simple mode	-0.0362891	0.0513390404044482	0.964361470207392	0.872045563469653	1.06645006199028	0.482589668268086
CES1_P23141_OID20244_v1_Cardiometabolic	5337_64_CD86_B7_2	57	Weighted mode	-0.0339989	0.0187883391362094	0.96657252669637	0.931625762515919	1.00283019958697	0.0757293475079601
CES1_P23141_OID20244_v1_Cardiometabolic	5660_51_SOD3_SOD3	57	MR Egger	0.00205253212087093	0.0183315248442002	1.00205464000685	0.966690152217147	1.03871286911972	0.911256942110576
CES1_P23141_OID20244_v1_Cardiometabolic	5660_51_SOD3_SOD3	57	Weighted median	-0.0062801	0.01787631116224	0.993739575093173	0.959524266172661	1.0291749546318	0.725356772703202
CES1_P23141_OID20244_v1_Cardiometabolic	5660_51_SOD3_SOD3	57	Inverse variance weighted	-0.0334639	0.013464313491573	0.967089804502015	0.941902066581812	0.992951096673817	0.0129413663892916
CES1_P23141_OID20244_v1_Cardiometabolic	5660_51_SOD3_SOD3	57	Simple mode	-0.044432	0.0381138564506276	0.956540680641258	0.887687849233417	1.03073402943589	0.248649046148075
CES1_P23141_OID20244_v1_Cardiometabolic	5660_51_SOD3_SOD3	57	Weighted mode	-0.00418039	0.0152296072581726	0.995828331832088	0.966542098038824	1.02600193875843	0.784717220291556
CES1_P23141_OID20244_v1_Cardiometabolic	7939_1_PQLC2L_CC055	57	MR Egger	-0.0511288	0.0200261592081152	0.950156277921319	0.91358388715326	0.988192726654169	0.0134808889785386
CES1_P23141_OID20244_v1_Cardiometabolic	7939_1_PQLC2L_CC055	57	Weighted median	-0.0468286	0.0179478580888451	0.954250922051091	0.921266041427907	0.988416788731288	0.0090767930552723
CES1_P23141_OID20244_v1_Cardiometabolic	7939_1_PQLC2L_CC055	57	Inverse variance weighted	-0.0288335	0.0141876842582043	0.971578222503063	0.944932901883123	0.998974890768454	0.0421242540255764
CES1_P23141_OID20244_v1_Cardiometabolic	7939_1_PQLC2L_CC055	57	Simple mode	-0.0135412	0.0349598362815006	0.986550086960882	0.921214416435564	1.05651958623099	0.699976145832412
CES1_P23141_OID20244_v1_Cardiometabolic	7939_1_PQLC2L_CC055	57	Weighted mode	-0.0399259	0.0150890219886827	0.96086066773876	0.932859806542585	0.989702007024171	0.0105531187378827
CES1_P23141_OID20244_v1_Cardiometabolic	9177_6_FAM3B_FAM3B	57	MR Egger	-0.0383058	0.0177791610083816	0.96241860238603	0.929458666888979	0.996547344400971	0.0355943798921614
CES1_P23141_OID20244_v1_Cardiometabolic	9177_6_FAM3B_FAM3B	57	Weighted median	-0.0260395	0.0183167080735331	0.974296644557512	0.939939087515692	1.00991007205047	0.155135644434239
CES1_P23141_OID20244_v1_Cardiometabolic	9177_6_FAM3B_FAM3B	57	Inverse variance weighted	-0.0261332	0.0123749535321113	0.974205279447793	0.950860279030608	0.998123433520144	0.0347049144582108
CES1_P23141_OID20244_v1_Cardiometabolic	9177_6_FAM3B_FAM3B	57	Simple mode	-0.0388292	0.0333447642879777	0.961914986688924	0.90105863873824	1.02688149454117	0.249167779511339
CES1_P23141_OID20244_v1_Cardiometabolic	9177_6_FAM3B_FAM3B	57	Weighted mode	-0.0252323	0.0161078773916309	0.975083347211731	0.944779448077232	1.00635924706515	0.12287514152771
CES1_P23141_OID20244_v1_Cardiometabolic	9294_45_MFAP2_MFAP2	57	MR Egger	-0.0283667	0.0195006019996382	0.97203181553139	0.935580653230415	1.00990315174095	0.151447077344901
CES1_P23141_OID20244_v1_Cardiometabolic	9294_45_MFAP2_MFAP2	57	Weighted median	-0.0185938	0.0176299856430335	0.981577989449567	0.948239111857564	1.01608901945038	0.291576484110736
CES1_P23141_OID20244_v1_Cardiometabolic	9294_45_MFAP2_MFAP2	57	Inverse variance weighted	-0.02821	0.0135241840209505	0.9721841500064	0.946752626091487	0.998298811618332	0.0369880689994499
CES1_P23141_OID20244_v1_Cardiometabolic	9294_45_MFAP2_MFAP2	57	Simple mode	-0.0316814	0.0332891079864027	0.968815173154358	0.907621282888489	1.03413489461929	0.345336134492319
CES1_P23141_OID20244_v1_Cardiometabolic	9294_45_MFAP2_MFAP2	57	Weighted mode	-0.0226699	0.0152972301276602	0.977585133132047	0.948709660980369	1.00733947573933	0.143956308260449
CES1_P23141_OID20244_v1_Cardiometabolic	9321_400_NMB_NMB	57	MR Egger	-0.025008	0.0169128535070794	0.975302151434703	0.943501664537383	1.00817446576478	0.144942238026429
CES1_P23141_OID20244_v1_Cardiometabolic	9321_400_NMB_NMB	57	Weighted median	-0.0171299	0.0171582269978495	0.983016001351034	0.950506759265996	1.01663712487262	0.318110659777236
CES1_P23141_OID20244_v1_Cardiometabolic	9321_400_NMB_NMB	57	Inverse variance weighted	-0.026173	0.0118216835868937	0.974166497903167	0.951854066556657	0.99700195542573	0.0268297095157983
CES1_P23141_OID20244_v1_Cardiometabolic	9321_400_NMB_NMB	57	Simple mode	-0.00306149	0.0326214430480681	0.996943195775422	0.935195655684936	1.0627676995302	0.925564185054907
CES1_P23141_OID20244_v1_Cardiometabolic	9321_400_NMB_NMB	57	Weighted mode	-0.0223906	0.0149390313444319	0.977858194869577	0.949641137345181	1.00691367683035	0.139542094629721
CES1_P23141_OID20244_v1_Cardiometabolic	9369_174_LRRC4C_NGL1	57	MR Egger	-0.0486148	0.0175961126276854	0.952547956976212	0.920256166851012	0.98597286606008	0.00777792725362681
CES1_P23141_OID20244_v1_Cardiometabolic	9369_174_LRRC4C_NGL1	57	Weighted median	-0.0447882	0.0184058562403155	0.956199946561136	0.922319379416812	0.991325085657039	0.0149590503031628
CES1_P23141_OID20244_v1_Cardiometabolic	9369_174_LRRC4C_NGL1	57	Inverse variance weighted	-0.0332466	0.012355651873426	0.967299981383384	0.944156171402866	0.991011108463168	0.00712804817561676
CES1_P23141_OID20244_v1_Cardiometabolic	9369_174_LRRC4C_NGL1	57	Simple mode	-0.0382931	0.0419040102514243	0.962430776679391	0.886543579314896	1.04481383827234	0.364724124379693
CES1_P23141_OID20244_v1_Cardiometabolic	9369_174_LRRC4C_NGL1	57	Weighted mode	-0.0404815	0.0164076090659823	0.960326939236989	0.929935170353123	0.991711959742405	0.0166995389602314
CPA1_P15085_OID20280_v1_Cardiometabolic	13565_2_RBL2_p130	78	MR Egger	0.0254647381867054	0.0294102185655521	1.02579173435609	0.968332953904055	1.08665999440677	0.389299409781607
CPA1_P15085_OID20280_v1_Cardiometabolic	13565_2_RBL2_p130	78	Weighted median	0.0394777258089072	0.0219382130412588	1.04026732751366	0.996485020303398	1.08597328674637	0.0719402618976012
CPA1_P15085_OID20280_v1_Cardiometabolic	13565_2_RBL2_p130	78	Inverse variance weighted	0.0347676484366937	0.014295585891047	1.03537910889426	1.00677112117292	1.06480000924713	0.0150134351937283
CPA1_P15085_OID20280_v1_Cardiometabolic	13565_2_RBL2_p130	78	Simple mode	0.0817132029845719	0.0512185831782232	1.08514454897939	0.981498081386165	1.19973611208352	0.114723365810882
CPA1_P15085_OID20280_v1_Cardiometabolic	13565_2_RBL2_p130	78	Weighted mode	0.0477042046136079	0.0275346232286792	1.04886036137911	0.993756	1.10702038273141	0.0871853020642561
CPA1_P15085_OID20280_v1_Cardiometabolic	3580_25_SERPINA1_a1_Antitrypsin	78	MR Egger	-0.0772552	0.0347423721107676	0.925653632379122	0.864719406042436	0.990881713940178	0.0291419199386473
CPA1_P15085_OID20280_v1_Cardiometabolic	3580_25_SERPINA1_a1_Antitrypsin	78	Weighted median	-0.0503449	0.0236839462862531	0.950901403531998	0.907768913651747	0.996083326539216	0.0335284797819026
CPA1_P15085_OID20280_v1_Cardiometabolic	3580_25_SERPINA1_a1_Antitrypsin	78	Inverse variance weighted	-0.0486753	0.016975800295942	0.952490343908099	0.921319978261848	0.984715274436742	0.00413944333518718
CPA1_P15085_OID20280_v1_Cardiometabolic	3580_25_SERPINA1_a1_Antitrypsin	78	Simple mode	-0.0503245	0.0428101531853402	0.950920796250915	0.874386829249899	1.0341536840373	0.243405835796037
CPA1_P15085_OID20280_v1_Cardiometabolic	3580_25_SERPINA1_a1_Antitrypsin	78	Weighted mode	-0.0564018	0.0261256256023988	0.94515928238138	0.897979500323556	0.994817886989409	0.0339749398159762
CPA1_P15085_OID20280_v1_Cardiometabolic	5660_51_SOD3_SOD3	78	MR Egger	0.0945329048985522	0.0373934804053619	1.09914532980353	1.02146889378474	1.18272858173153	0.0135444934633288
CPA1_P15085_OID20280_v1_Cardiometabolic	5660_51_SOD3_SOD3	78	Weighted median	0.0758493866748517	0.0245023701060352	1.07880008025346	1.02821546488976	1.13187328229852	0.00196419190452961
CPA1_P15085_OID20280_v1_Cardiometabolic	5660_51_SOD3_SOD3	78	Inverse variance weighted	0.0842661225944783	0.0183063006884564	1.0879183749489	1.04957547537219	1.12766201033018	4.16205655570082e-06
CPA1_P15085_OID20280_v1_Cardiometabolic	5660_51_SOD3_SOD3	78	Simple mode	0.0360636123319511	0.050588020528277	1.03672179268422	0.938859997904293	1.14478418275943	0.478069711609542
CPA1_P15085_OID20280_v1_Cardiometabolic	5660_51_SOD3_SOD3	78	Weighted mode	0.0741253560162178	0.0267707446572275	1.07694179816849	1.02189086103795	1.13495841959517	0.00704388452794398
CPA1_P15085_OID20280_v1_Cardiometabolic	7905_30_HP_HPT	78	MR Egger	-0.120044	0.0555657305761284	0.886881256160376	0.795365907778148	0.988926423469487	0.0338935231531161
CPA1_P15085_OID20280_v1_Cardiometabolic	7905_30_HP_HPT	78	Weighted median	-0.0289327	0.0229399870724186	0.971481818679768	0.928769116899096	1.01615881369566	0.207224028223026
CPA1_P15085_OID20280_v1_Cardiometabolic	7905_30_HP_HPT	78	Inverse variance weighted	-0.0572562	0.0272593061702758	0.944352121616948	0.895221225166541	0.9961793850861	0.0356913297644944
CPA1_P15085_OID20280_v1_Cardiometabolic	7905_30_HP_HPT	78	Simple mode	-0.0274875	0.0444224806999698	0.972886829810629	0.891762376180801	1.06139125051748	0.537891001264985
CPA1_P15085_OID20280_v1_Cardiometabolic	7905_30_HP_HPT	78	Weighted mode	-0.0359731	0.0258768161011364	0.964666195963675	0.916959743451021	1.01485466104841	0.168483178888191
CPA1_P15085_OID20280_v1_Cardiometabolic	9177_6_FAM3B_FAM3B	78	MR Egger	0.033076634208166	0.0374549023343264	1.03362974760348	0.960467653216043	1.1123648480544	0.379964131687889
CPA1_P15085_OID20280_v1_Cardiometabolic	9177_6_FAM3B_FAM3B	78	Weighted median	0.0589206549890579	0.0237503111911019	1.06069107685611	1.01244687051314	1.11123417266524	0.0131074230987854
CPA1_P15085_OID20280_v1_Cardiometabolic	9177_6_FAM3B_FAM3B	78	Inverse variance weighted	0.0387651039329403	0.0181769452560427	1.03952627433593	1.0031432208225	1.07722890670458	0.032953260378378
CPA1_P15085_OID20280_v1_Cardiometabolic	9177_6_FAM3B_FAM3B	78	Simple mode	0.0955533698440817	0.0488929840246892	1.10026754157414	0.999723159483101	1.21092389583885	0.0542920562042902
CPA1_P15085_OID20280_v1_Cardiometabolic	9177_6_FAM3B_FAM3B	78	Weighted mode	0.0568367563355306	0.0289844874683624	1.05848300564662	1.0000271612664	1.1203558429592	0.0535024772616215
CPA1_P15085_OID20280_v1_Cardiometabolic	9321_400_NMB_NMB	78	MR Egger	-0.0486811	0.0345520704807166	0.952484869224786	0.890116331205524	1.01922343664166	0.162937590258788
CPA1_P15085_OID20280_v1_Cardiometabolic	9321_400_NMB_NMB	78	Weighted median	-0.0715788	0.0240106634430624	0.930922953926595	0.888127769531375	0.975780260316253	0.00287192621628425
CPA1_P15085_OID20280_v1_Cardiometabolic	9321_400_NMB_NMB	78	Inverse variance weighted	-0.0667689	0.0168436302750686	0.935411382950081	0.905034350153876	0.966808005910289	7.36911531207983e-05
CPA1_P15085_OID20280_v1_Cardiometabolic	9321_400_NMB_NMB	78	Simple mode	-0.0440689	0.0531575737272107	0.956888062264566	0.862208889726788	1.06196395631525	0.409653839407053
CPA1_P15085_OID20280_v1_Cardiometabolic	9321_400_NMB_NMB	78	Weighted mode	-0.0503749	0.0324905599765442	0.950872862892946	0.892207624372694	1.01339551096297	0.12513475488747
CRELD2_Q6UXH1_OID20751_v1_Inflammation	11308_8_CREB3L4_CR3L4	71	MR Egger	-0.0266358	0.0394948921438456	0.973715849574421	0.901184074467344	1.05208534257869	0.502303993609676
CRELD2_Q6UXH1_OID20751_v1_Inflammation	11308_8_CREB3L4_CR3L4	71	Weighted median	0.000963276496300086	0.017998455171693	1.00096374059611	0.966268342923283	1.03690493156072	0.957317632287233
CRELD2_Q6UXH1_OID20751_v1_Inflammation	11308_8_CREB3L4_CR3L4	71	Inverse variance weighted	0.0756233031674303	0.0298380820087789	1.07855620891619	1.01728840652122	1.1435139615615	0.0112622099948526
CRELD2_Q6UXH1_OID20751_v1_Inflammation	11308_8_CREB3L4_CR3L4	71	Simple mode	0.00976785524626655	0.0299859526424419	1.00981571645117	0.952176738313134	1.0709438071322	0.745587019707583
CRELD2_Q6UXH1_OID20751_v1_Inflammation	11308_8_CREB3L4_CR3L4	71	Weighted mode	-0.0115554	0.0143449061838211	0.988511139072902	0.961105221920539	1.01669853600275	0.423237190393528
CRELD2_Q6UXH1_OID20751_v1_Inflammation	11441_11_PYGL_PYGL	71	MR Egger	0.0237313831680054	0.0205913799338373	1.02401521322091	0.983509756024859	1.06618887152287	0.253096545613111
CRELD2_Q6UXH1_OID20751_v1_Inflammation	11441_11_PYGL_PYGL	71	Weighted median	0.0222631789718709	0.0174524114070246	1.02251285294367	0.988127493667514	1.05809477130772	0.202079060844101
CRELD2_Q6UXH1_OID20751_v1_Inflammation	11441_11_PYGL_PYGL	71	Inverse variance weighted	0.0374988348770973	0.0143433874445273	1.03821078743795	1.00942998019229	1.06781219133912	0.00893937582004681
CRELD2_Q6UXH1_OID20751_v1_Inflammation	11441_11_PYGL_PYGL	71	Simple mode	0.017413096702007	0.0288826129090047	1.01756558850266	0.961561431575935	1.07683159172447	0.548528886568713
CRELD2_Q6UXH1_OID20751_v1_Inflammation	11441_11_PYGL_PYGL	71	Weighted mode	0.0271884910116234	0.0157569416272778	1.02756147061169	0.996311703957023	1.05979140031382	0.0888509949389818
CRELD2_Q6UXH1_OID20751_v1_Inflammation	11465_4_GPR135_GP135	71	MR Egger	0.0276922993883097	0.0173677699530726	1.02807929511936	0.993671579617676	1.06367844138179	0.115402661706733
CRELD2_Q6UXH1_OID20751_v1_Inflammation	11465_4_GPR135_GP135	71	Weighted median	0.0266040162402015	0.017622532490086	1.02696106233487	0.992095260636435	1.06305217391665	0.131130436948517
CRELD2_Q6UXH1_OID20751_v1_Inflammation	11465_4_GPR135_GP135	71	Inverse variance weighted	0.0239587289095282	0.0120101148984262	1.02424804518457	1.00041899146102	1.04864468489579	0.046056051977497
CRELD2_Q6UXH1_OID20751_v1_Inflammation	11465_4_GPR135_GP135	71	Simple mode	0.0192497770229183	0.0295016934226021	1.0194362485707	0.962160942815652	1.08012102617536	0.516217478231747
CRELD2_Q6UXH1_OID20751_v1_Inflammation	11465_4_GPR135_GP135	71	Weighted mode	0.0283702771022039	0.0157444537994583	1.02877654630324	0.997514242280375	1.06101861744259	0.0758634150866983
CRELD2_Q6UXH1_OID20751_v1_Inflammation	12781_2_TARBP2_TRBP2	71	MR Egger	0.0273885489170109	0.0165951892523794	1.02776706297166	0.994875155039811	1.06174642152676	0.103408111836887
CRELD2_Q6UXH1_OID20751_v1_Inflammation	12781_2_TARBP2_TRBP2	71	Weighted median	0.0217116557562957	0.0171246878596833	1.02194906885134	0.988217234478652	1.05683230659006	0.204849014398148
CRELD2_Q6UXH1_OID20751_v1_Inflammation	12781_2_TARBP2_TRBP2	71	Inverse variance weighted	0.0302532771646531	0.0114739721290078	1.03071555761045	1.00779451206769	1.05415791411738	0.00837199549695175
CRELD2_Q6UXH1_OID20751_v1_Inflammation	12781_2_TARBP2_TRBP2	71	Simple mode	0.0238309647340452	0.0349536134140808	1.02411719133698	0.95630525016748	1.09673770107219	0.497622492663318
CRELD2_Q6UXH1_OID20751_v1_Inflammation	12781_2_TARBP2_TRBP2	71	Weighted mode	0.0309813532851749	0.0169957837545788	1.03146627024981	0.997672330360336	1.06640490498397	0.0725912215711581
CRELD2_Q6UXH1_OID20751_v1_Inflammation	15447_45_SORD_Sorbitol_dehydrogenase	71	MR Egger	0.0329199564494253	0.0191927508304915	1.03346781349732	0.995313182389685	1.07308507556446	0.0907912108712092
CRELD2_Q6UXH1_OID20751_v1_Inflammation	15447_45_SORD_Sorbitol_dehydrogenase	71	Weighted median	0.0403421705470585	0.0172625961265269	1.04116696992075	1.00652870180485	1.07699726526439	0.0194407401884574
CRELD2_Q6UXH1_OID20751_v1_Inflammation	15447_45_SORD_Sorbitol_dehydrogenase	71	Inverse variance weighted	0.0324252767046346	0.0132476327418391	1.03295670433119	1.00648082679336	1.06012904033374	0.0143800041580269
CRELD2_Q6UXH1_OID20751_v1_Inflammation	15447_45_SORD_Sorbitol_dehydrogenase	71	Simple mode	0.0271492807695907	0.0304410348903749	1.02752118046762	0.968007786710454	1.09069347458192	0.375521084445662
CRELD2_Q6UXH1_OID20751_v1_Inflammation	15447_45_SORD_Sorbitol_dehydrogenase	71	Weighted mode	0.0356966174743713	0.0154679760875253	1.03634139092458	1.00539387921027	1.06824151285575	0.0239722288463916
CRELD2_Q6UXH1_OID20751_v1_Inflammation	15585_304_FBLN5_fibulin_5	71	MR Egger	0.0392392320106133	0.0202156594902587	1.04001925978996	0.999616612921322	1.08205490660367	0.0563401585248869
CRELD2_Q6UXH1_OID20751_v1_Inflammation	15585_304_FBLN5_fibulin_5	71	Weighted median	0.0442493559164775	0.018552132200319	1.0452429599116	1.00791836251798	1.0839497382659	0.0170728146753479
CRELD2_Q6UXH1_OID20751_v1_Inflammation	15585_304_FBLN5_fibulin_5	71	Inverse variance weighted	0.0287875293653802	0.014031239816892	1.02920589521266	1.00128712696207	1.05790311911262	0.0402013590273928
CRELD2_Q6UXH1_OID20751_v1_Inflammation	15585_304_FBLN5_fibulin_5	71	Simple mode	0.0089900516263659	0.0351323379041249	1.00903058351068	0.941887601369319	1.08095989052168	0.798785421946175
CRELD2_Q6UXH1_OID20751_v1_Inflammation	15585_304_FBLN5_fibulin_5	71	Weighted mode	0.026683552830672	0.0163367603581659	1.02704274656472	0.994677716336075	1.0604608768724	0.106886935188669
CRELD2_Q6UXH1_OID20751_v1_Inflammation	4430_44_COLEC11_Collectin_Kidney_1	71	MR Egger	0.0467181990204746	0.0173411146184764	1.04782668888355	1.01281098079711	1.08405298792531	0.00885569124326642
CRELD2_Q6UXH1_OID20751_v1_Inflammation	4430_44_COLEC11_Collectin_Kidney_1	71	Weighted median	0.0172468706415205	0.0180847020892656	1.01739645664105	0.981965458928587	1.05410586551094	0.340249791989692
CRELD2_Q6UXH1_OID20751_v1_Inflammation	4430_44_COLEC11_Collectin_Kidney_1	71	Inverse variance weighted	0.0290238023137432	0.0121061748207449	1.02944909745392	1.00530974666784	1.0541680788049	0.016510179408156
CRELD2_Q6UXH1_OID20751_v1_Inflammation	4430_44_COLEC11_Collectin_Kidney_1	71	Simple mode	0.0145046602914848	0.0335500909165984	1.01461036332042	0.950037788409917	1.08357183463213	0.66683162722343
CRELD2_Q6UXH1_OID20751_v1_Inflammation	4430_44_COLEC11_Collectin_Kidney_1	71	Weighted mode	0.0215505778514173	0.0166720300398439	1.02178446869352	0.988935070654536	1.05572502325384	0.200393448286167
CRELD2_Q6UXH1_OID20751_v1_Inflammation	5005_4_MAPK12_MK12	71	MR Egger	0.0555918523686246	0.035170385449396	1.05716611582475	0.986746508220585	1.13261125034369	0.118533055975699
CRELD2_Q6UXH1_OID20751_v1_Inflammation	5005_4_MAPK12_MK12	71	Weighted median	0.0755745996940165	0.018555070035171	1.07850368076171	1.03998538734533	1.11844858934572	4.64135791410152e-05
CRELD2_Q6UXH1_OID20751_v1_Inflammation	5005_4_MAPK12_MK12	71	Inverse variance weighted	0.0682092314487713	0.0243619593339536	1.07058928599373	1.02067052743427	1.12294946163064	0.00511302611977536
CRELD2_Q6UXH1_OID20751_v1_Inflammation	5005_4_MAPK12_MK12	71	Simple mode	0.108999022495897	0.0380298049755522	1.11516126026621	1.03506125106975	1.20145994752799	0.00548340992341246
CRELD2_Q6UXH1_OID20751_v1_Inflammation	5005_4_MAPK12_MK12	71	Weighted mode	0.0763643063101227	0.0188130442940742	1.0793557186396	1.04028086531288	1.11989829497594	0.000126521814286324
CRELD2_Q6UXH1_OID20751_v1_Inflammation	5337_64_CD86_B7_2	71	MR Egger	0.0476906942297963	0.0181098951957542	1.04884619096879	1.0122699655284	1.0867440206383	0.0104253867102029
CRELD2_Q6UXH1_OID20751_v1_Inflammation	5337_64_CD86_B7_2	71	Weighted median	0.0407363874743488	0.0177462905040179	1.04157749647737	1.00597141633346	1.07844384398337	0.021705203728712
CRELD2_Q6UXH1_OID20751_v1_Inflammation	5337_64_CD86_B7_2	71	Inverse variance weighted	0.0424209912642312	0.0125472757056043	1.0433336206468	1.01798820425081	1.06931007591888	0.000722507839341168
CRELD2_Q6UXH1_OID20751_v1_Inflammation	5337_64_CD86_B7_2	71	Simple mode	0.0147616594149929	0.0338184312422189	1.01487115080414	0.949782312084283	1.08442054524502	0.663819252390434
CRELD2_Q6UXH1_OID20751_v1_Inflammation	5337_64_CD86_B7_2	71	Weighted mode	0.0325636681882072	0.0151151068958131	1.03309966663412	1.00294237899688	1.06416374813777	0.0346539696773063
CRELD2_Q6UXH1_OID20751_v1_Inflammation	5708_1_LEAP2_LEAP2	71	MR Egger	0.0272063927590623	0.019309144618079	1.02757986592227	0.9894168689153	1.06721485556077	0.163328864032433
CRELD2_Q6UXH1_OID20751_v1_Inflammation	5708_1_LEAP2_LEAP2	71	Weighted median	0.0426506193887334	0.017779103224464	1.04357322689845	1.00783410433194	1.08057970574546	0.0164435747588366
CRELD2_Q6UXH1_OID20751_v1_Inflammation	5708_1_LEAP2_LEAP2	71	Inverse variance weighted	0.0315214797851871	0.0133668074602151	1.03202354300158	1.00533672702828	1.05941876455447	0.0183642609357448
CRELD2_Q6UXH1_OID20751_v1_Inflammation	5708_1_LEAP2_LEAP2	71	Simple mode	0.0411068833796164	0.0347412011557634	1.04196346817088	0.973374994353751	1.11538500095075	0.240720379182978
CRELD2_Q6UXH1_OID20751_v1_Inflammation	5708_1_LEAP2_LEAP2	71	Weighted mode	0.0294537608768898	0.0173256140543648	1.02989181307656	0.995505687116829	1.06546568278684	0.0935681753786896
CRELD2_Q6UXH1_OID20751_v1_Inflammation	6600_70_RELL2_RELL2	71	MR Egger	0.0456137200721133	0.0158218563715547	1.04667002523705	1.01471002455591	1.0796366599504	0.00524890856049569
CRELD2_Q6UXH1_OID20751_v1_Inflammation	6600_70_RELL2_RELL2	71	Weighted median	0.048716805681001	0.0180600689451135	1.04992297641235	1.01340816447875	1.08775347884193	0.00698649605042389
CRELD2_Q6UXH1_OID20751_v1_Inflammation	6600_70_RELL2_RELL2	71	Inverse variance weighted	0.0302464567016111	0.011032507812473	1.03070852767706	1.00866002430697	1.05323899373938	0.00611452463050575
CRELD2_Q6UXH1_OID20751_v1_Inflammation	6600_70_RELL2_RELL2	71	Simple mode	0.00116651337302343	0.0349375961609439	1.00116719401438	0.934904237146965	1.07212665270343	0.973459816182433
CRELD2_Q6UXH1_OID20751_v1_Inflammation	6600_70_RELL2_RELL2	71	Weighted mode	0.0482431223724251	0.0178759661477415	1.04942576319323	1.01329381610302	1.08684610026449	0.00871687783499241
CRELD2_Q6UXH1_OID20751_v1_Inflammation	7898_29_MDM1_MDM1	71	MR Egger	0.0298196042788677	0.0192090447007449	1.03026866113061	0.992200452225611	1.06979745043141	0.125147971085903
CRELD2_Q6UXH1_OID20751_v1_Inflammation	7898_29_MDM1_MDM1	71	Weighted median	0.0314321466081741	0.0196689204526062	1.0319313531776	0.992906342132918	1.07249019618851	0.110029267197374
CRELD2_Q6UXH1_OID20751_v1_Inflammation	7898_29_MDM1_MDM1	71	Inverse variance weighted	0.0395006731137572	0.0133308395887434	1.04029119911904	1.0134620356192	1.06783060532043	0.00304552982858005
CRELD2_Q6UXH1_OID20751_v1_Inflammation	7898_29_MDM1_MDM1	71	Simple mode	0.0509832750576638	0.0336197205607604	1.05230529339067	0.985199246809299	1.12398221383575	0.133903925493561
CRELD2_Q6UXH1_OID20751_v1_Inflammation	7898_29_MDM1_MDM1	71	Weighted mode	0.0386489738831897	0.0176544999969126	1.03940556110733	1.00405435062124	1.07600143338095	0.0319200257780095
CSF2_P04141_OID30072_v1_Cardiometabolic_II	16845_15_MPZL1_MPZL1	23	MR Egger	-0.0828761	0.0473415028452116	0.920465196933725	0.838898603784601	1.00996255679046	0.0946116585439646
CSF2_P04141_OID30072_v1_Cardiometabolic_II	16845_15_MPZL1_MPZL1	23	Weighted median	-0.0716741	0.0379179424917183	0.93083419236961	0.864163509373373	1.0026485546846	0.0587255088424072
CSF2_P04141_OID30072_v1_Cardiometabolic_II	16845_15_MPZL1_MPZL1	23	Inverse variance weighted	-0.0625614	0.026226758045087	0.939355397224023	0.892288442758169	0.988905067027804	0.0170604221205817
CSF2_P04141_OID30072_v1_Cardiometabolic_II	16845_15_MPZL1_MPZL1	23	Simple mode	-0.0402372	0.0707347279620179	0.960561535545236	0.836208496325963	1.10340718567556	0.575221850307734
CSF2_P04141_OID30072_v1_Cardiometabolic_II	16845_15_MPZL1_MPZL1	23	Weighted mode	-0.0826323	0.0400026828240002	0.920689601484468	0.851260079106832	0.995781856904448	0.0508364291908164
CSF2_P04141_OID30072_v1_Cardiometabolic_II	3054_3_HP_Haptoglobin__Mixed_Type	23	MR Egger	-0.0940109	0.0518783736020267	0.910272874211344	0.822265062938111	1.00770024517915	0.0842894074528895
CSF2_P04141_OID30072_v1_Cardiometabolic_II	3054_3_HP_Haptoglobin__Mixed_Type	23	Weighted median	-0.0690536	0.034188680747182	0.933276651442486	0.872787280141436	0.99795829745199	0.0434062419349322
CSF2_P04141_OID30072_v1_Cardiometabolic_II	3054_3_HP_Haptoglobin__Mixed_Type	23	Inverse variance weighted	-0.0593122	0.0289313601935471	0.942412	0.89045947008076	0.997396635650793	0.0403545269115072
CSF2_P04141_OID30072_v1_Cardiometabolic_II	3054_3_HP_Haptoglobin__Mixed_Type	23	Simple mode	-0.138892	0.064945588560504	0.870321733820584	0.766296828076584	0.98846803563275	0.0438221389431645
CSF2_P04141_OID30072_v1_Cardiometabolic_II	3054_3_HP_Haptoglobin__Mixed_Type	23	Weighted mode	-0.0707499	0.0370736589652185	0.931694838105223	0.866395032843711	1.00191626041848	0.069478328057882
CSF2_P04141_OID30072_v1_Cardiometabolic_II	5708_1_LEAP2_LEAP2	23	MR Egger	-0.161451	0.0821326039001135	0.850907844905314	0.724385658976415	0.999528568172524	0.0626900048757612
CSF2_P04141_OID30072_v1_Cardiometabolic_II	5708_1_LEAP2_LEAP2	23	Weighted median	-0.13806	0.0404495471675051	0.871046575912867	0.804655581697445	0.942915397180223	0.000642197460454755
CSF2_P04141_OID30072_v1_Cardiometabolic_II	5708_1_LEAP2_LEAP2	23	Inverse variance weighted	-0.141231	0.0453915314507986	0.868288718577086	0.794375985704337	0.949078663474156	0.00186205534554851
CSF2_P04141_OID30072_v1_Cardiometabolic_II	5708_1_LEAP2_LEAP2	23	Simple mode	-0.0776319	0.0767069968251725	0.9253050045503	0.796142113163082	1.07542276346139	0.322512841487131
CSF2_P04141_OID30072_v1_Cardiometabolic_II	5708_1_LEAP2_LEAP2	23	Weighted mode	-0.14984	0.0433655144624097	0.860845379211219	0.790699895690823	0.937213689982668	0.00225301636470621
CSF2_P04141_OID30072_v1_Cardiometabolic_II	7121_2_SYT7_SYT7	23	MR Egger	-0.0991484	0.0499217813356768	0.905608285391655	0.821194645717564	0.998699115790488	0.0602328774193519
CSF2_P04141_OID30072_v1_Cardiometabolic_II	7121_2_SYT7_SYT7	23	Weighted median	-0.107127	0.0361585361223421	0.898412002159115	0.836944727624235	0.964393584167407	0.00304964003461116
CSF2_P04141_OID30072_v1_Cardiometabolic_II	7121_2_SYT7_SYT7	23	Inverse variance weighted	-0.0588314	0.0281186472067642	0.942865725128618	0.892307971750612	0.99628805722558	0.0364156553786993
CSF2_P04141_OID30072_v1_Cardiometabolic_II	7121_2_SYT7_SYT7	23	Simple mode	-0.142224	0.0849869025924637	0.867426684894555	0.734328639448743	1.02464892862139	0.108392951841167
CSF2_P04141_OID30072_v1_Cardiometabolic_II	7121_2_SYT7_SYT7	23	Weighted mode	-0.132151	0.0435072267249452	0.87620895620425	0.804588070344362	0.95420521783768	0.00604562733486674
CTBS_Q01459_OID30710_v1_Inflammation_II	10011_65_OCRL_OCRL	97	MR Egger	0.0122143941749182	0.0144848757168779	1.01228929453095	0.983954166052013	1.04144039547448	0.40120595974699
CTBS_Q01459_OID30710_v1_Inflammation_II	10011_65_OCRL_OCRL	97	Weighted median	0.0188236910172598	0.0132256143941292	1.01900197357734	0.992926621740835	1.04576209300745	0.154656348496347
CTBS_Q01459_OID30710_v1_Inflammation_II	10011_65_OCRL_OCRL	97	Inverse variance weighted	0.0395764559447381	0.0100866322578047	1.04037003831844	1.02000411002001	1.06114260324842	8.72159364282777e-05
CTBS_Q01459_OID30710_v1_Inflammation_II	10011_65_OCRL_OCRL	97	Simple mode	0.0272800575434979	0.0222835752407124	1.02765556515973	0.983737928794801	1.07353384442297	0.22386413063085
CTBS_Q01459_OID30710_v1_Inflammation_II	10011_65_OCRL_OCRL	97	Weighted mode	0.0185398676309985	0.0112941165492998	1.01871279802593	0.996409859216021	1.04151495016151	0.103955295395757
CTBS_Q01459_OID30710_v1_Inflammation_II	10024_44_HOGA1_HOGA1	97	MR Egger	0.0044431699609123	0.0133926956785015	1.00445305547615	0.978429529575369	1.03116873536435	0.740800770364645
CTBS_Q01459_OID30710_v1_Inflammation_II	10024_44_HOGA1_HOGA1	97	Weighted median	0.0170302167939101	0.013450547051594	1.01717605766018	0.990710560498167	1.04434854490382	0.205464530204772
CTBS_Q01459_OID30710_v1_Inflammation_II	10024_44_HOGA1_HOGA1	97	Inverse variance weighted	0.0297800238172089	0.00929236603483936	1.03022788342837	1.01163414265809	1.04916337541212	0.0013516398207969
CTBS_Q01459_OID30710_v1_Inflammation_II	10024_44_HOGA1_HOGA1	97	Simple mode	0.0275190800602521	0.0240233371572874	1.0279012273375	0.980623523892588	1.07745827773725	0.254843727677529
CTBS_Q01459_OID30710_v1_Inflammation_II	10024_44_HOGA1_HOGA1	97	Weighted mode	0.0217983367161839	0.0124846505393204	1.02203765621695	0.997331987148663	1.04735532820099	0.0840080812799561
CTBS_Q01459_OID30710_v1_Inflammation_II	10816_150_PILRA_PILRA_isoform_FDF03_M14	97	MR Egger	0.00338594323064952	0.00917226351740201	1.00339168201166	0.985514249571596	1.02159341477594	0.71283724408665
CTBS_Q01459_OID30710_v1_Inflammation_II	10816_150_PILRA_PILRA_isoform_FDF03_M14	97	Weighted median	0.00113716958561866	0.00980048488919163	1.00113781640811	0.982090534586646	1.02055451319898	0.907627203145646
CTBS_Q01459_OID30710_v1_Inflammation_II	10816_150_PILRA_PILRA_isoform_FDF03_M14	97	Inverse variance weighted	0.0189125037485042	0.00617582246523709	1.01909247794467	1.00683111808908	1.03150315871695	0.00219609619762416
CTBS_Q01459_OID30710_v1_Inflammation_II	10816_150_PILRA_PILRA_isoform_FDF03_M14	97	Simple mode	0.00891922395030531	0.018219925553212	1.00895911875025	0.973563887095183	1.04564119191672	0.625582326104969
CTBS_Q01459_OID30710_v1_Inflammation_II	10816_150_PILRA_PILRA_isoform_FDF03_M14	97	Weighted mode	0.00394628997092622	0.00925958111153885	1.00395408682604	0.98589789056416	1.02234097273292	0.670927486868443
CTBS_Q01459_OID30710_v1_Inflammation_II	11275_94_LRP1B_LRP1B	97	MR Egger	0.013294096730977	0.0125049419732885	1.01338285612411	0.98884707071167	1.03852743614559	0.290428151009582
CTBS_Q01459_OID30710_v1_Inflammation_II	11275_94_LRP1B_LRP1B	97	Weighted median	0.0179712347099816	0.0131339142955326	1.01813368905772	0.992258880686866	1.04468322629346	0.171215813785252
CTBS_Q01459_OID30710_v1_Inflammation_II	11275_94_LRP1B_LRP1B	97	Inverse variance weighted	0.025864387045534	0.00846974499029651	1.02620177278236	1.0093067276144	1.04337962846115	0.00226008931563243
CTBS_Q01459_OID30710_v1_Inflammation_II	11275_94_LRP1B_LRP1B	97	Simple mode	0.0361724987366419	0.0237719217392534	1.03683468373893	0.989633637106896	1.08628700672175	0.131384437610039
CTBS_Q01459_OID30710_v1_Inflammation_II	11275_94_LRP1B_LRP1B	97	Weighted mode	0.0153172037650902	0.0122859496982154	1.01543511337665	0.991275027782212	1.04018404638433	0.21553161368463
CTBS_Q01459_OID30710_v1_Inflammation_II	11308_8_CREB3L4_CR3L4	97	MR Egger	0.00439295223022892	0.0188103490231911	1.00440261538963	0.968046329443775	1.04212431070441	0.815845298307324
CTBS_Q01459_OID30710_v1_Inflammation_II	11308_8_CREB3L4_CR3L4	97	Weighted median	0.0206072205190924	0.013764345488063	1.02082101533477	0.99364935449569	1.04873569396922	0.13435554239111
CTBS_Q01459_OID30710_v1_Inflammation_II	11308_8_CREB3L4_CR3L4	97	Inverse variance weighted	0.0315296217362927	0.0129092888062154	1.03203194572102	1.00624684634245	1.05847778888465	0.0145900500819935
CTBS_Q01459_OID30710_v1_Inflammation_II	11308_8_CREB3L4_CR3L4	97	Simple mode	0.0295120907726071	0.024621898824299	1.02995188831069	0.981427797963092	1.08087512340326	0.233629544218587
CTBS_Q01459_OID30710_v1_Inflammation_II	11308_8_CREB3L4_CR3L4	97	Weighted mode	0.0162754525155626	0.0115393976078033	1.01640861916108	0.993678299765755	1.03965889297218	0.161646334470606
CTBS_Q01459_OID30710_v1_Inflammation_II	11327_56_CLK2_CLK2	97	MR Egger	0.0158654816564372	0.0171538253183729	1.01599200665159	0.982400693202988	1.05073191084022	0.357364143620555
CTBS_Q01459_OID30710_v1_Inflammation_II	11327_56_CLK2_CLK2	97	Weighted median	0.0199119885151385	0.0135150784593068	1.0201115545431	0.993444019566164	1.0474949400438	0.140665705192534
CTBS_Q01459_OID30710_v1_Inflammation_II	11327_56_CLK2_CLK2	97	Inverse variance weighted	0.0280487329559889	0.0116062914995573	1.02844580240424	1.0053144735969	1.05210936106248	0.0156626301398483
CTBS_Q01459_OID30710_v1_Inflammation_II	11327_56_CLK2_CLK2	97	Simple mode	0.0334408734377625	0.0235082238021669	1.0340063046807	0.987444244354051	1.08276395779576	0.158117164248911
CTBS_Q01459_OID30710_v1_Inflammation_II	11327_56_CLK2_CLK2	97	Weighted mode	0.0153320653490223	0.0120748651887729	1.01545020446295	0.991699966648222	1.03976923708985	0.207242832612037
CTBS_Q01459_OID30710_v1_Inflammation_II	11358_15_GRB10_GRB10	97	MR Egger	0.0311032976408676	0.0137728796029741	1.03159205940904	1.00411690488452	1.05981900300559	0.0262150758970056
CTBS_Q01459_OID30710_v1_Inflammation_II	11358_15_GRB10_GRB10	97	Weighted median	0.0186607448066436	0.0149754286672839	1.0188359445944	0.989365851257667	1.0491838592145	0.212731039491661
CTBS_Q01459_OID30710_v1_Inflammation_II	11358_15_GRB10_GRB10	97	Inverse variance weighted	0.0238195397359157	0.00928958002842087	1.02410549086682	1.00562773944258	1.04292275887788	0.010343964290447
CTBS_Q01459_OID30710_v1_Inflammation_II	11358_15_GRB10_GRB10	97	Simple mode	0.0241843763298971	0.0333460869575553	1.02447919019144	0.959662178250099	1.09367403959707	0.47006054055305
CTBS_Q01459_OID30710_v1_Inflammation_II	11358_15_GRB10_GRB10	97	Weighted mode	0.0318739499371633	0.0144698795704023	1.03238736461099	1.00351916374644	1.0620860160053	0.0300032957273494
CTBS_Q01459_OID30710_v1_Inflammation_II	11441_11_PYGL_PYGL	97	MR Egger	0.0170607171790535	0.0148842087958366	1.01720708239483	0.987960726963974	1.04731921040413	0.254579244766471
CTBS_Q01459_OID30710_v1_Inflammation_II	11441_11_PYGL_PYGL	97	Weighted median	0.0147093369942629	0.0140680460670217	1.01481805167795	0.98721835472011	1.04318935429781	0.295752708956358
CTBS_Q01459_OID30710_v1_Inflammation_II	11441_11_PYGL_PYGL	97	Inverse variance weighted	0.0211581101389516	0.0100445916023318	1.02138352996336	1.0014717926236	1.04169116191224	0.0351680453972214
CTBS_Q01459_OID30710_v1_Inflammation_II	11441_11_PYGL_PYGL	97	Simple mode	0.0242743606466506	0.0282114142905583	1.02457138139922	0.969456172742679	1.08281998206527	0.391687807197824
CTBS_Q01459_OID30710_v1_Inflammation_II	11441_11_PYGL_PYGL	97	Weighted mode	0.0166480800435354	0.012697548341594	1.01678743156583	0.991794733775283	1.04240993199757	0.192942856215477
CTBS_Q01459_OID30710_v1_Inflammation_II	12475_48_CLIC5_CLIC5	97	MR Egger	0.00231552535148487	0.0155602640385404	1.00231820825069	0.97221083251373	1.03335794767199	0.882018866078115
CTBS_Q01459_OID30710_v1_Inflammation_II	12475_48_CLIC5_CLIC5	97	Weighted median	0.0243762794740199	0.0144013878263965	1.02467580983449	0.996156962775724	1.05401111922595	0.0905251446763288
CTBS_Q01459_OID30710_v1_Inflammation_II	12475_48_CLIC5_CLIC5	97	Inverse variance weighted	0.0242638347667992	0.010674086141796	1.02456059694071	1.00334821873274	1.04622143858425	0.0230169398552324
CTBS_Q01459_OID30710_v1_Inflammation_II	12475_48_CLIC5_CLIC5	97	Simple mode	0.0539637584327372	0.0260347023353496	1.05544635043203	1.00294005536566	1.11070147480964	0.040874060461633
CTBS_Q01459_OID30710_v1_Inflammation_II	12475_48_CLIC5_CLIC5	97	Weighted mode	0.0257561013776064	0.0127107997808634	1.02609065585426	1.00084328917566	1.05197491497256	0.0455066183461623
CTBS_Q01459_OID30710_v1_Inflammation_II	12716_3_ZNF175_ZN175	97	MR Egger	0.0146889612716637	0.0174335392594391	1.0147973742375	0.98070774845013	1.05007196321921	0.401585765298837
CTBS_Q01459_OID30710_v1_Inflammation_II	12716_3_ZNF175_ZN175	97	Weighted median	0.021461486175413	0.0137519193287266	1.02169344025769	0.994522779262712	1.04960641187067	0.11861402355468
CTBS_Q01459_OID30710_v1_Inflammation_II	12716_3_ZNF175_ZN175	97	Inverse variance weighted	0.0405664553787064	0.0119706631877783	1.04140051406854	1.01725106570319	1.06612326815556	0.000701933760025676
CTBS_Q01459_OID30710_v1_Inflammation_II	12716_3_ZNF175_ZN175	97	Simple mode	0.0362330281176609	0.0257404667713725	1.03689744459998	0.985882315722196	1.09055238487605	0.162470754681062
CTBS_Q01459_OID30710_v1_Inflammation_II	12716_3_ZNF175_ZN175	97	Weighted mode	0.0184305456727361	0.0131215025916239	1.01860143643518	0.99273889075675	1.04513774565325	0.163365709049738
CTBS_Q01459_OID30710_v1_Inflammation_II	12781_2_TARBP2_TRBP2	97	MR Egger	0.0175641400609869	0.0139036375620284	1.01771929663514	0.990359778188061	1.04583464469701	0.209581344050554
CTBS_Q01459_OID30710_v1_Inflammation_II	12781_2_TARBP2_TRBP2	97	Weighted median	0.0355252038870328	0.0138930682143362	1.0361637631534	1.00832928727513	1.06476659720315	0.0105565488685963
CTBS_Q01459_OID30710_v1_Inflammation_II	12781_2_TARBP2_TRBP2	97	Inverse variance weighted	0.024552519540929	0.00938010694323496	1.02485641468221	1.00618656818207	1.04387268119963	0.0088574008733019
CTBS_Q01459_OID30710_v1_Inflammation_II	12781_2_TARBP2_TRBP2	97	Simple mode	0.053304436862571	0.0263762260834215	1.0547507012405	1.00160832570977	1.11071265404964	0.0460721574867802
CTBS_Q01459_OID30710_v1_Inflammation_II	12781_2_TARBP2_TRBP2	97	Weighted mode	0.0282357192253663	0.0122428897690693	1.02863812562843	1.00424865533097	1.05361992558272	0.0232450297921119
CTBS_Q01459_OID30710_v1_Inflammation_II	13111_79_BCL6_BCL6	97	MR Egger	0.0206440971417458	0.0140893217016829	1.02085866046025	0.99305326748127	1.04944260168436	0.146160015462097
CTBS_Q01459_OID30710_v1_Inflammation_II	13111_79_BCL6_BCL6	97	Weighted median	0.0113915020615894	0.0143138976870695	1.01145663229665	0.983474334671001	1.04023509607815	0.426127892926885
CTBS_Q01459_OID30710_v1_Inflammation_II	13111_79_BCL6_BCL6	97	Inverse variance weighted	0.0348086332300693	0.00957968778729204	1.0354215445627	1.0161616544058	1.05504647837899	0.000279507662628669
CTBS_Q01459_OID30710_v1_Inflammation_II	13111_79_BCL6_BCL6	97	Simple mode	0.0470471354383903	0.0289297209543481	1.04817141393439	0.990391343367077	1.10932	0.107173499112085
CTBS_Q01459_OID30710_v1_Inflammation_II	13111_79_BCL6_BCL6	97	Weighted mode	0.0154947117147383	0.0126711905640814	1.01561537718028	0.99070266816901	1.04115455373849	0.22438740888837
CTBS_Q01459_OID30710_v1_Inflammation_II	13378_80_C5orf63_YD286	97	MR Egger	0.00346878975600896	0.0157970312620658	1.0034748129696	0.972881111799876	1.03503057881497	0.82666557113246
CTBS_Q01459_OID30710_v1_Inflammation_II	13378_80_C5orf63_YD286	97	Weighted median	0.0136803736542291	0.0131707762323267	1.01377437814895	0.987938976556083	1.04028539634497	0.298948223805844
CTBS_Q01459_OID30710_v1_Inflammation_II	13378_80_C5orf63_YD286	97	Inverse variance weighted	0.0312041927447298	0.0108941768075962	1.0316961472479	1.00990029302401	1.0539624036141	0.00417931727913668
CTBS_Q01459_OID30710_v1_Inflammation_II	13378_80_C5orf63_YD286	97	Simple mode	0.00355794916736818	0.0265278630817699	1.00356428618187	0.95271768017678	1.05712457893386	0.893587503712489
CTBS_Q01459_OID30710_v1_Inflammation_II	13378_80_C5orf63_YD286	97	Weighted mode	0.0126136609739755	0.0129004168002226	1.01269354873457	0.987408785137239	1.03862578405769	0.330644874390644
CTBS_Q01459_OID30710_v1_Inflammation_II	13430_50_SLC14A1_UT1	97	MR Egger	0.0138412423356341	0.0141216580066655	1.0139374758147	0.986258086755138	1.0423936884958	0.329505105483717
CTBS_Q01459_OID30710_v1_Inflammation_II	13430_50_SLC14A1_UT1	97	Weighted median	0.0145297252113516	0.0134119197199562	1.01463579476659	0.988311213473776	1.04166155557734	0.278655680887848
CTBS_Q01459_OID30710_v1_Inflammation_II	13430_50_SLC14A1_UT1	97	Inverse variance weighted	0.0305181615364101	0.00965267589124848	1.03098861421601	1.01166644505727	1.05067982420121	0.00156890341995712
CTBS_Q01459_OID30710_v1_Inflammation_II	13430_50_SLC14A1_UT1	97	Simple mode	0.0155683751136679	0.0252770528005113	1.01569019361655	0.966596009106118	1.06727791103012	0.539411886041722
CTBS_Q01459_OID30710_v1_Inflammation_II	13430_50_SLC14A1_UT1	97	Weighted mode	0.0155683751136679	0.0123417563282543	1.01569019361655	0.991415590984034	1.04055915479893	0.210207263143008
CTBS_Q01459_OID30710_v1_Inflammation_II	13645_14_DHX38_PRP16	97	MR Egger	0.00119887511314814	0.0143472819787715	1.00119959405119	0.973437363719753	1.02975359739413	0.933581198099689
CTBS_Q01459_OID30710_v1_Inflammation_II	13645_14_DHX38_PRP16	97	Weighted median	-0.000170466	0.0142807399745681	0.999829548881242	0.972232100992605	1.02821036848656	0.990476076282199
CTBS_Q01459_OID30710_v1_Inflammation_II	13645_14_DHX38_PRP16	97	Inverse variance weighted	0.0257468576814217	0.00991362953439735	1.02608117102781	1.00633613269231	1.04621362120933	0.00940098440019388
CTBS_Q01459_OID30710_v1_Inflammation_II	13645_14_DHX38_PRP16	97	Simple mode	0.00583650268172331	0.0247549740623457	1.00585356824842	0.958214859931265	1.0558606874774	0.814112702003785
CTBS_Q01459_OID30710_v1_Inflammation_II	13645_14_DHX38_PRP16	97	Weighted mode	0.00306524728814128	0.0115305782237372	1.00306994996234	0.980654879573788	1.02599736714178	0.790935287537524
CTBS_Q01459_OID30710_v1_Inflammation_II	13672_3_HSPA6_HSP76	97	MR Egger	0.0220051913825338	0.0148249496261579	1.02224909134274	0.992973095081359	1.05238823682875	0.141030581504485
CTBS_Q01459_OID30710_v1_Inflammation_II	13672_3_HSPA6_HSP76	97	Weighted median	0.0194778923597482	0.013659181120396	1.01966882413994	0.99273243476902	1.04733609430706	0.153870453587389
CTBS_Q01459_OID30710_v1_Inflammation_II	13672_3_HSPA6_HSP76	97	Inverse variance weighted	0.0378759522695404	0.0100580825013916	1.03860238861809	1.01832804474631	1.05928038337776	0.000166067848592535
CTBS_Q01459_OID30710_v1_Inflammation_II	13672_3_HSPA6_HSP76	97	Simple mode	0.0183835637870001	0.0267931987278296	1.01855358174305	0.966444789891594	1.07347197660195	0.494286193725528
CTBS_Q01459_OID30710_v1_Inflammation_II	13672_3_HSPA6_HSP76	97	Weighted mode	0.0239264488004872	0.0116653644053723	1.02421498287962	1.00106289904319	1.04790251657287	0.0429848659552589
CTBS_Q01459_OID30710_v1_Inflammation_II	13942_140_SPSB1_SPSB1	97	MR Egger	0.0116643903583027	0.014492573918153	1.01173268463825	0.983398298211075	1.04088346199845	0.422914291836126
CTBS_Q01459_OID30710_v1_Inflammation_II	13942_140_SPSB1_SPSB1	97	Weighted median	0.0180030298826663	0.0134741337534025	1.01816606130882	0.991628961635036	1.04541332343887	0.181510774415581
CTBS_Q01459_OID30710_v1_Inflammation_II	13942_140_SPSB1_SPSB1	97	Inverse variance weighted	0.0238801786649162	0.00980579538875688	1.02416759340987	1.00467169821747	1.04404181112298	0.014878922749228
CTBS_Q01459_OID30710_v1_Inflammation_II	13942_140_SPSB1_SPSB1	97	Simple mode	0.0039917046254071	0.0249422402671836	1.00399968208934	0.956097784329222	1.05430153500743	0.873187447522824
CTBS_Q01459_OID30710_v1_Inflammation_II	13942_140_SPSB1_SPSB1	97	Weighted mode	0.0101319408423207	0.011635209838942	1.01018344274606	0.987406894757227	1.03348537813196	0.386035729056996
CTBS_Q01459_OID30710_v1_Inflammation_II	14135_3_RXFP1_RXFP1	97	MR Egger	0.0092456194033037	0.0150933379021881	1.00928849216894	0.979868085622947	1.03959224243643	0.541628917714861
CTBS_Q01459_OID30710_v1_Inflammation_II	14135_3_RXFP1_RXFP1	97	Weighted median	0.00749817049459	0.0137773208338396	1.00752635216794	0.980683620724797	1.03510380805849	0.586276259315962
CTBS_Q01459_OID30710_v1_Inflammation_II	14135_3_RXFP1_RXFP1	97	Inverse variance weighted	0.0309620837238878	0.0103782787887551	1.0314463945388	1.01067725667538	1.05264233243629	0.00285107648030794
CTBS_Q01459_OID30710_v1_Inflammation_II	14135_3_RXFP1_RXFP1	97	Simple mode	0.0221668755094038	0.0262945861638303	1.02241438615693	0.971056608346896	1.07648840246317	0.401312512753146
CTBS_Q01459_OID30710_v1_Inflammation_II	14135_3_RXFP1_RXFP1	97	Weighted mode	0.00849384999425995	0.0120951841236292	1.00853002508752	0.984902417852127	1.0327244537801	0.484222147053535
CTBS_Q01459_OID30710_v1_Inflammation_II	15447_45_SORD_Sorbitol_dehydrogenase	97	MR Egger	0.00900544995548003	0.0145355038157138	1.00904612101532	0.980704451466778	1.03820684489934	0.537038150270738
CTBS_Q01459_OID30710_v1_Inflammation_II	15447_45_SORD_Sorbitol_dehydrogenase	97	Weighted median	0.0209641368505359	0.0141147151709093	1.02118542805518	0.993321694779424	1.04983076877607	0.137472806116557
CTBS_Q01459_OID30710_v1_Inflammation_II	15447_45_SORD_Sorbitol_dehydrogenase	97	Inverse variance weighted	0.021344850818887	0.00981004846915619	1.02157428162821	1.0021193985762	1.04140685667492	0.0295690950182023
CTBS_Q01459_OID30710_v1_Inflammation_II	15447_45_SORD_Sorbitol_dehydrogenase	97	Simple mode	0.0325723966666954	0.0244132926501747	1.03310868406169	0.984838454417809	1.08374479925708	0.185292199099216
CTBS_Q01459_OID30710_v1_Inflammation_II	15447_45_SORD_Sorbitol_dehydrogenase	97	Weighted mode	0.0204809078770365	0.0124665245324001	1.02069208087845	0.996054324507755	1.04594	0.103680964364633
CTBS_Q01459_OID30710_v1_Inflammation_II	16845_15_MPZL1_MPZL1	97	MR Egger	-0.00803651	0.0126298204333327	0.991995693209458	0.967740833753123	1.01685846150536	0.526102874255059
CTBS_Q01459_OID30710_v1_Inflammation_II	16845_15_MPZL1_MPZL1	97	Weighted median	0.0212714971524846	0.0133688082560076	1.02149934815751	0.995080772198572	1.04861931557651	0.111580570147305
CTBS_Q01459_OID30710_v1_Inflammation_II	16845_15_MPZL1_MPZL1	97	Inverse variance weighted	0.0199371926180282	0.0085642347149414	1.02013726586369	1.00315626311903	1.03740571580358	0.0199142477777654
CTBS_Q01459_OID30710_v1_Inflammation_II	16845_15_MPZL1_MPZL1	97	Simple mode	0.0176483955698841	0.0269041757576613	1.01780504870488	0.965524512616754	1.07291643415825	0.513411041412132
CTBS_Q01459_OID30710_v1_Inflammation_II	16845_15_MPZL1_MPZL1	97	Weighted mode	0.0105645777769486	0.0122365922642136	1.01062057996817	0.986670492248364	1.03515202357761	0.390091731966592
CTBS_Q01459_OID30710_v1_Inflammation_II	17712_7_IDI1_IDI1	97	MR Egger	0.0230005606928789	0.0137069487726915	1.02326711328564	0.996142400824705	1.05113042499251	0.0966298048574711
CTBS_Q01459_OID30710_v1_Inflammation_II	17712_7_IDI1_IDI1	97	Weighted median	0.0339926854458149	0.014935412700737	1.03457703923063	1.00473042987626	1.06531027455298	0.0228472674089726
CTBS_Q01459_OID30710_v1_Inflammation_II	17712_7_IDI1_IDI1	97	Inverse variance weighted	0.0243087183497645	0.00923719519749361	1.02460658392329	1.0062230992842	1.04332593096479	0.00849807267579539
CTBS_Q01459_OID30710_v1_Inflammation_II	17712_7_IDI1_IDI1	97	Simple mode	0.0459330506069688	0.0280904854469933	1.04700431230722	0.990917199248271	1.10626602386308	0.105285830964472
CTBS_Q01459_OID30710_v1_Inflammation_II	17712_7_IDI1_IDI1	97	Weighted mode	0.0265875901947049	0.0131657540823543	1.02694419356428	1.00078301859241	1.05378924012789	0.0462281772004719
CTBS_Q01459_OID30710_v1_Inflammation_II	19277_4_TSTD1_KAT	97	MR Egger	0.0200494456272561	0.0137953083048687	1.02025178576909	0.993035010109831	1.04821450982871	0.149421366019798
CTBS_Q01459_OID30710_v1_Inflammation_II	19277_4_TSTD1_KAT	97	Weighted median	0.0315982404240896	0.0144139991410427	1.03210276482862	1.00335240890302	1.06167694193462	0.0283657118778837
CTBS_Q01459_OID30710_v1_Inflammation_II	19277_4_TSTD1_KAT	97	Inverse variance weighted	0.0228827103417675	0.00906419999366394	1.02314652800271	1.00512999193355	1.04148600296985	0.0115858006086381
CTBS_Q01459_OID30710_v1_Inflammation_II	19277_4_TSTD1_KAT	97	Simple mode	0.028688733913283	0.0275963971645851	1.02910421937358	0.974919666678251	1.08630026711936	0.301145093553757
CTBS_Q01459_OID30710_v1_Inflammation_II	19277_4_TSTD1_KAT	97	Weighted mode	0.0243335092889355	0.0134491527563791	1.02463198519765	0.997975222519573	1.05200077256375	0.0735346056134575
CTBS_Q01459_OID30710_v1_Inflammation_II	19553_14_STX1A_STX1a	97	MR Egger	0.00819008057539463	0.0137021559589752	1.00822371103467	0.981506988463318	1.03566766558027	0.551447609395116
CTBS_Q01459_OID30710_v1_Inflammation_II	19553_14_STX1A_STX1a	97	Weighted median	0.0153051089636251	0.0135429080342294	1.01542283196482	0.988823930728078	1.0427372312038	0.25842573380849
CTBS_Q01459_OID30710_v1_Inflammation_II	19553_14_STX1A_STX1a	97	Inverse variance weighted	0.0195577112323751	0.00930205280488166	1.0197502162042	1.00132656684723	1.03851284673562	0.0355081336510776
CTBS_Q01459_OID30710_v1_Inflammation_II	19553_14_STX1A_STX1a	97	Simple mode	0.0314851235103384	0.0233255371880201	1.03198602315205	0.985867879923875	1.08026153774623	0.180250105190691
CTBS_Q01459_OID30710_v1_Inflammation_II	19553_14_STX1A_STX1a	97	Weighted mode	0.0169267315421724	0.0116683726214586	1.01707080038617	0.994074347548822	1.04059924244989	0.150136845758934
CTBS_Q01459_OID30710_v1_Inflammation_II	2833_20_KLK4_Kallikrein_4	97	MR Egger	0.00297068965245603	0.0126675168082881	1.0029751065236	0.978379504023613	1.02818902089525	0.815091908988347
CTBS_Q01459_OID30710_v1_Inflammation_II	2833_20_KLK4_Kallikrein_4	97	Weighted median	0.0100959159556748	0.013253856274596	1.01014705165754	0.984243805952899	1.03673201680402	0.446218643424862
CTBS_Q01459_OID30710_v1_Inflammation_II	2833_20_KLK4_Kallikrein_4	97	Inverse variance weighted	0.0171604761993407	0.00851962084479767	1.01730856303852	1.00046212609091	1.03443867133202	0.0439853876037654
CTBS_Q01459_OID30710_v1_Inflammation_II	2833_20_KLK4_Kallikrein_4	97	Simple mode	0.0539950165642458	0.0262750357757721	1.05547934222848	1.0024990639112	1.11125953327549	0.042596130466513
CTBS_Q01459_OID30710_v1_Inflammation_II	2833_20_KLK4_Kallikrein_4	97	Weighted mode	0.00807295315024648	0.0124774300205631	1.00810562730298	0.98375065868033	1.03306355816141	0.519173099509316
CTBS_Q01459_OID30710_v1_Inflammation_II	2997_8_JAM2_JAM_B	97	MR Egger	0.0243748309467737	0.0129261575593227	1.02467432556473	0.999040023203329	1.05096637680735	0.0623910462244395
CTBS_Q01459_OID30710_v1_Inflammation_II	2997_8_JAM2_JAM_B	97	Weighted median	0.0353333668586046	0.0139551064144239	1.03596500764105	1.00801329423392	1.06469180832815	0.0113436303674068
CTBS_Q01459_OID30710_v1_Inflammation_II	2997_8_JAM2_JAM_B	97	Inverse variance weighted	0.0385877604978046	0.00875940742814306	1.03934193752147	1.02165036224175	1.05733987185263	1.05640751872187e-05
CTBS_Q01459_OID30710_v1_Inflammation_II	2997_8_JAM2_JAM_B	97	Simple mode	0.0373259328933796	0.0252320660035021	1.0380312942511	0.987944342351414	1.09065756202422	0.142332729655494
CTBS_Q01459_OID30710_v1_Inflammation_II	2997_8_JAM2_JAM_B	97	Weighted mode	0.0287707198268817	0.0121370515875072	1.02918859488195	1.00499453000524	1.05396510350116	0.0197634734073231
CTBS_Q01459_OID30710_v1_Inflammation_II	3432_21_EPHA3_EPHA3	97	MR Egger	0.00732343979723108	0.0122797607506797	1.00735032176522	0.983394525162116	1.0318896890271	0.552337905835247
CTBS_Q01459_OID30710_v1_Inflammation_II	3432_21_EPHA3_EPHA3	97	Weighted median	0.0215948806363555	0.0123103229723798	1.02182973759385	0.997469853839582	1.04678453049173	0.0793946837589088
CTBS_Q01459_OID30710_v1_Inflammation_II	3432_21_EPHA3_EPHA3	97	Inverse variance weighted	0.0248859943910951	0.00827923898101182	1.02519823551269	1.00869628083883	1.0419701569875	0.002648560299428
CTBS_Q01459_OID30710_v1_Inflammation_II	3432_21_EPHA3_EPHA3	97	Simple mode	0.0391838335123731	0.0237853526478042	1.0399616458807	0.992592116952456	1.08959179347855	0.102746743494045
CTBS_Q01459_OID30710_v1_Inflammation_II	3432_21_EPHA3_EPHA3	97	Weighted mode	0.0181190744389135	0.0115940997358282	1.01828422079334	0.995405227371133	1.04168907878369	0.121394023105624
CTBS_Q01459_OID30710_v1_Inflammation_II	5005_4_MAPK12_MK12	97	MR Egger	0.0204137817693753	0.0131438818373205	1.02062356809146	0.994666049669975	1.04725849252558	0.123724108899648
CTBS_Q01459_OID30710_v1_Inflammation_II	5005_4_MAPK12_MK12	97	Weighted median	0.031718470569371	0.0141632849818492	1.03222686215396	1.00396627694472	1.06128295284451	0.0251243473172345
CTBS_Q01459_OID30710_v1_Inflammation_II	5005_4_MAPK12_MK12	97	Inverse variance weighted	0.0263120246454381	0.00887652315367161	1.02666124211114	1.00895388762753	1.0446793644174	0.00303444904646796
CTBS_Q01459_OID30710_v1_Inflammation_II	5005_4_MAPK12_MK12	97	Simple mode	0.0454505545372195	0.0252100203034006	1.04649925869451	0.996046749492644	1.09950732634388	0.0745451437073346
CTBS_Q01459_OID30710_v1_Inflammation_II	5005_4_MAPK12_MK12	97	Weighted mode	0.0274453899344488	0.012614545212756	1.02782548395755	1.00272458627451	1.05355472473013	0.0320329488523828
CTBS_Q01459_OID30710_v1_Inflammation_II	5315_22_TNNT2_Troponin_T	97	MR Egger	-0.00566351	0.0156111818324673	0.994352493826548	0.964388140509007	1.02524786488687	0.717570873407451
CTBS_Q01459_OID30710_v1_Inflammation_II	5315_22_TNNT2_Troponin_T	97	Weighted median	-0.0102687	0.0138371582313301	0.989783885174407	0.963300868509348	1.0169949715367	0.458022268026172
CTBS_Q01459_OID30710_v1_Inflammation_II	5315_22_TNNT2_Troponin_T	97	Inverse variance weighted	0.0215638088388017	0.0108387579417742	1.02179798800037	1.00031989442824	1.04373724255317	0.0466450253552334
CTBS_Q01459_OID30710_v1_Inflammation_II	5315_22_TNNT2_Troponin_T	97	Simple mode	-0.0208437	0.0247185810645226	0.979372025698462	0.93305407491941	1.02798925646786	0.401190236140874
CTBS_Q01459_OID30710_v1_Inflammation_II	5315_22_TNNT2_Troponin_T	97	Weighted mode	-0.0101701	0.0122723127778637	0.989881424184146	0.966355162185673	1.01398044144412	0.409327485281773
CTBS_Q01459_OID30710_v1_Inflammation_II	5337_64_CD86_B7_2	97	MR Egger	-0.0170915	0.0136071189984922	0.983053693281291	0.95718222614505	1.00962443459281	0.212169647286876
CTBS_Q01459_OID30710_v1_Inflammation_II	5337_64_CD86_B7_2	97	Weighted median	0.000505098352282599	0.0146165433027867	1.00050522593594	0.972249007746561	1.02958264719161	0.972433291975098
CTBS_Q01459_OID30710_v1_Inflammation_II	5337_64_CD86_B7_2	97	Inverse variance weighted	0.0250893458679763	0.0100959499290714	1.02540673228633	1.00531536067687	1.04589963283778	0.0129518625641333
CTBS_Q01459_OID30710_v1_Inflammation_II	5337_64_CD86_B7_2	97	Simple mode	0.0544102356387809	0.0342237561039694	1.0559176883827	0.987411579142181	1.12917671636795	0.115159259422349
CTBS_Q01459_OID30710_v1_Inflammation_II	5337_64_CD86_B7_2	97	Weighted mode	0.00600841603079716	0.0131301731222999	1.00602650276847	0.980466575380442	1.03225275566364	0.64827116354853
CTBS_Q01459_OID30710_v1_Inflammation_II	5618_50_FAM3B_FAM3B	97	MR Egger	0.0380425648532669	0.0165711460400607	1.03877544726199	1.00557862149389	1.07306818857316	0.0238915453061414
CTBS_Q01459_OID30710_v1_Inflammation_II	5618_50_FAM3B_FAM3B	97	Weighted median	0.0322300204683944	0.0165725005351616	1.03275503278236	0.999747951189118	1.0668518564791	0.0518003515070749
CTBS_Q01459_OID30710_v1_Inflammation_II	5618_50_FAM3B_FAM3B	97	Inverse variance weighted	0.0593760708248938	0.0113200847533661	1.06117424238171	1.03788885687397	1.08498204334333	1.56115708875638e-07
CTBS_Q01459_OID30710_v1_Inflammation_II	5618_50_FAM3B_FAM3B	97	Simple mode	0.0598741831994286	0.0364021451206353	1.06170295807236	0.988591554299994	1.14022132424321	0.103282169645302
CTBS_Q01459_OID30710_v1_Inflammation_II	5618_50_FAM3B_FAM3B	97	Weighted mode	0.025860200282512	0.0165840962258044	1.02619747632772	0.993377398409213	1.06010189290371	0.122207250568552
CTBS_Q01459_OID30710_v1_Inflammation_II	6119_14_MAMDC2_MAMC2	97	MR Egger	0.00555515953303268	0.0136749604300204	1.00557061804333	0.97897638048237	1.03288729741753	0.685488288261821
CTBS_Q01459_OID30710_v1_Inflammation_II	6119_14_MAMDC2_MAMC2	97	Weighted median	0.0164463536615649	0.0139474448925855	1.01658233940298	0.989168449976045	1.04475597944016	0.238332057354289
CTBS_Q01459_OID30710_v1_Inflammation_II	6119_14_MAMDC2_MAMC2	97	Inverse variance weighted	0.0246966931579826	0.00944994425217091	1.02500418259034	1.00619390581586	1.04416610779985	0.00896405161177735
CTBS_Q01459_OID30710_v1_Inflammation_II	6119_14_MAMDC2_MAMC2	97	Simple mode	0.0270551361569994	0.028643086703335	1.02742444943758	0.971333592789672	1.08675434180181	0.347254409475675
CTBS_Q01459_OID30710_v1_Inflammation_II	6119_14_MAMDC2_MAMC2	97	Weighted mode	0.00965622723380843	0.0124209925074762	1.00970299902112	0.985418437786367	1.0345860267466	0.43882737976519
CTBS_Q01459_OID30710_v1_Inflammation_II	6402_8_PILRA_PILRA_isoform_FDF03_deltaTM	97	MR Egger	0.00904521779532057	0.00891095646746165	1.00908624939776	0.991615094190781	1.0268652269302	0.312652154628185
CTBS_Q01459_OID30710_v1_Inflammation_II	6402_8_PILRA_PILRA_isoform_FDF03_deltaTM	97	Weighted median	-7.2699e-05	0.00966268550303705	0.999927303601938	0.981168017297874	1.01904525510547	0.993997021345326
CTBS_Q01459_OID30710_v1_Inflammation_II	6402_8_PILRA_PILRA_isoform_FDF03_deltaTM	97	Inverse variance weighted	0.0159760681295882	0.00605735309296811	1.01610436783706	1.00411208759335	1.02823987390906	0.00835277830574992
CTBS_Q01459_OID30710_v1_Inflammation_II	6402_8_PILRA_PILRA_isoform_FDF03_deltaTM	97	Simple mode	-0.00226194	0.0173509409918462	0.997740620461849	0.964380087798925	1.03225518477022	0.896551332802182
CTBS_Q01459_OID30710_v1_Inflammation_II	6402_8_PILRA_PILRA_isoform_FDF03_deltaTM	97	Weighted mode	0.00396316972767852	0.00932287817476625	1.00397103346984	0.985792225238988	1.02248507366969	0.671714016942272
CTBS_Q01459_OID30710_v1_Inflammation_II	6604_59_NDNF_CD031	97	MR Egger	0.0121093638394995	0.0146051595422517	1.01218297903008	0.983618904754119	1.04157654767149	0.409117465901353
CTBS_Q01459_OID30710_v1_Inflammation_II	6604_59_NDNF_CD031	97	Weighted median	0.0187635599122387	0.0137801691304187	1.01894070170484	0.991788329898962	1.04683642899541	0.17331311949241
CTBS_Q01459_OID30710_v1_Inflammation_II	6604_59_NDNF_CD031	97	Inverse variance weighted	0.0332091314847467	0.0100488485731921	1.03376670980339	1.01360510678965	1.05432934694112	0.00095054431340017
CTBS_Q01459_OID30710_v1_Inflammation_II	6604_59_NDNF_CD031	97	Simple mode	-0.00338531	0.0258939589209987	0.996620417508957	0.947301876068992	1.04850658664101	0.896256702950523
CTBS_Q01459_OID30710_v1_Inflammation_II	6604_59_NDNF_CD031	97	Weighted mode	0.0119031373918828	0.0119118745613049	1.01197426165224	0.98862109829462	1.03587907238998	0.320177713050987
CTBS_Q01459_OID30710_v1_Inflammation_II	6986_17_HS3ST3B1_HS3SB	97	MR Egger	0.0078741703998596	0.0134772575730662	1.00790525320982	0.981629577174666	1.0348842608959	0.560432859834776
CTBS_Q01459_OID30710_v1_Inflammation_II	6986_17_HS3ST3B1_HS3SB	97	Weighted median	0.0113171337305559	0.0132367261291752	1.01138141475193	0.985479603225665	1.0379640154474	0.392562319291268
CTBS_Q01459_OID30710_v1_Inflammation_II	6986_17_HS3ST3B1_HS3SB	97	Inverse variance weighted	0.0198091329835386	0.00918867647653967	1.02000663582269	1.00180094684986	1.03854317606096	0.0310977192279489
CTBS_Q01459_OID30710_v1_Inflammation_II	6986_17_HS3ST3B1_HS3SB	97	Simple mode	0.0209985560173432	0.0261011090721163	1.02122057701166	0.970290645564121	1.07482378777928	0.423091414358121
CTBS_Q01459_OID30710_v1_Inflammation_II	6986_17_HS3ST3B1_HS3SB	97	Weighted mode	0.00909424676394771	0.0120889548397285	1.00913572506868	0.985505959994286	1.03333206794183	0.453724884040392
CTBS_Q01459_OID30710_v1_Inflammation_II	7009_8_CD72_CD72	97	MR Egger	0.00728995163822791	0.0131508040384378	1.00731658802232	0.98168418691019	1.03361826749864	0.580652199477962
CTBS_Q01459_OID30710_v1_Inflammation_II	7009_8_CD72_CD72	97	Weighted median	0.0246339985071141	0.013438005766714	1.02493992232538	0.998296959027209	1.05229394407854	0.066778959075796
CTBS_Q01459_OID30710_v1_Inflammation_II	7009_8_CD72_CD72	97	Inverse variance weighted	0.0321773112723741	0.00917535651153795	1.0327005985295	1.01429482009465	1.05144037519946	0.000453312414946612
CTBS_Q01459_OID30710_v1_Inflammation_II	7009_8_CD72_CD72	97	Simple mode	0.0314753395247773	0.0290142047944552	1.03197592626509	0.974927176178918	1.09236293582942	0.280715905820985
CTBS_Q01459_OID30710_v1_Inflammation_II	7009_8_CD72_CD72	97	Weighted mode	0.0196791258611407	0.0129745623087473	1.01987403631477	0.994265489173858	1.04614216351132	0.132616751643449
CTBS_Q01459_OID30710_v1_Inflammation_II	7738_299_STX2_STX2	97	MR Egger	0.0126939491408967	0.0126950919834452	1.01277485930734	0.98788554691638	1.03829124623465	0.319894192831635
CTBS_Q01459_OID30710_v1_Inflammation_II	7738_299_STX2_STX2	97	Weighted median	0.010511767597168	0.0135949277748365	1.0105672103229	0.983995169642814	1.03785680873872	0.439396651152204
CTBS_Q01459_OID30710_v1_Inflammation_II	7738_299_STX2_STX2	97	Inverse variance weighted	0.0278967636654958	0.00864295371666726	1.02828952210054	1.01101681746013	1.04585732205534	0.00124794720446655
CTBS_Q01459_OID30710_v1_Inflammation_II	7738_299_STX2_STX2	97	Simple mode	0.00764190070854998	0.0241228903980024	1.00767117455353	0.961136380900612	1.05645901685111	0.75209049522431
CTBS_Q01459_OID30710_v1_Inflammation_II	7738_299_STX2_STX2	97	Weighted mode	0.0123619244943921	0.0129805122126075	1.01243864891085	0.987005290439133	1.03852737947573	0.343313785149561
CTBS_Q01459_OID30710_v1_Inflammation_II	7765_15_ITM2A_ITM2A	97	MR Egger	0.0163220332278091	0.0146657696849079	1.0164559653012	0.987653970018775	1.04609788525099	0.268544999085525
CTBS_Q01459_OID30710_v1_Inflammation_II	7765_15_ITM2A_ITM2A	97	Weighted median	0.0162064162339234	0.0135340791732533	1.01633845251144	0.98973269343254	1.04365942128369	0.231130251485617
CTBS_Q01459_OID30710_v1_Inflammation_II	7765_15_ITM2A_ITM2A	97	Inverse variance weighted	0.0312109310026476	0.00999146812004793	1.03170309910606	1.01169551742789	1.05210635647687	0.00178557093587287
CTBS_Q01459_OID30710_v1_Inflammation_II	7765_15_ITM2A_ITM2A	97	Simple mode	0.0163478573701442	0.0243314430744742	1.01648221474366	0.969144291000356	1.06613236283284	0.503272591285911
CTBS_Q01459_OID30710_v1_Inflammation_II	7765_15_ITM2A_ITM2A	97	Weighted mode	0.0163478573701442	0.0116652091535097	1.01648221474366	0.993505230214571	1.0399905923666	0.16431319869509
CTBS_Q01459_OID30710_v1_Inflammation_II	7898_29_MDM1_MDM1	97	MR Egger	0.0137311160419127	0.0131847679498763	1.01382582078662	0.987962014199533	1.04036671463167	0.300315529262512
CTBS_Q01459_OID30710_v1_Inflammation_II	7898_29_MDM1_MDM1	97	Weighted median	0.0204176785928053	0.013704242149887	1.02062754528905	0.993578073260488	1.04841342038116	0.13625574706877
CTBS_Q01459_OID30710_v1_Inflammation_II	7898_29_MDM1_MDM1	97	Inverse variance weighted	0.0271090439176974	0.00900257647002515	1.02747983708184	1.00950891924012	1.04577066679548	0.00260171165903121
CTBS_Q01459_OID30710_v1_Inflammation_II	7898_29_MDM1_MDM1	97	Simple mode	0.0397907998516709	0.028409940283439	1.04059305919784	0.984232939211929	1.10018052811537	0.164559418342846
CTBS_Q01459_OID30710_v1_Inflammation_II	7898_29_MDM1_MDM1	97	Weighted mode	0.0199897735641564	0.0121857600779629	1.02019090705655	0.996113256826876	1.04485055259309	0.10419040281819
CTBS_Q01459_OID30710_v1_Inflammation_II	7939_1_PQLC2L_CC055	97	MR Egger	0.0044362243914885	0.0126386468318789	1.00444607900195	0.979869848883427	1.02963870841832	0.726362032990979
CTBS_Q01459_OID30710_v1_Inflammation_II	7939_1_PQLC2L_CC055	97	Weighted median	0.0100128258279436	0.0130314752423625	1.0100631218969	0.984591085482737	1.03619413709795	0.442275091785024
CTBS_Q01459_OID30710_v1_Inflammation_II	7939_1_PQLC2L_CC055	97	Inverse variance weighted	0.0172399060623649	0.00860943550921822	1.01738937092757	1.00036547923556	1.03470296962603	0.0452370803393399
CTBS_Q01459_OID30710_v1_Inflammation_II	7939_1_PQLC2L_CC055	97	Simple mode	-0.0146929	0.0249581153239122	0.98541451904682	0.938370141331024	1.03481742606484	0.55744376721989
CTBS_Q01459_OID30710_v1_Inflammation_II	7939_1_PQLC2L_CC055	97	Weighted mode	0.00255064557247553	0.0123616066127187	1.00255390123632	0.978555177954959	1.02714118480749	0.836965363394815
CTBS_Q01459_OID30710_v1_Inflammation_II	8253_2_POMGNT1_PMGT1	97	MR Egger	-0.0072071	0.0126047080675866	0.992818813493605	0.96859150140758	1.0176521216575	0.568822795353354
CTBS_Q01459_OID30710_v1_Inflammation_II	8253_2_POMGNT1_PMGT1	97	Weighted median	-0.00213118	0.0138529444348319	0.997871090984403	0.9711416415887	1.02533623477771	0.877733537802675
CTBS_Q01459_OID30710_v1_Inflammation_II	8253_2_POMGNT1_PMGT1	97	Inverse variance weighted	0.0220637591313716	0.00890155187851349	1.02230896392406	1.00462739090862	1.04030173492905	0.0131883653881495
CTBS_Q01459_OID30710_v1_Inflammation_II	8253_2_POMGNT1_PMGT1	97	Simple mode	-0.00446754	0.0263012998079381	0.995542428400418	0.945522037086998	1.04820901879647	0.86547775651977
CTBS_Q01459_OID30710_v1_Inflammation_II	8253_2_POMGNT1_PMGT1	97	Weighted mode	-0.00164743	0.012759688557878	0.998353930830723	0.973695731303023	1.02363658293062	0.897539361544246
CTBS_Q01459_OID30710_v1_Inflammation_II	8363_18_KIAA1324L_K132L	97	MR Egger	-0.00990941	0.0135911259463639	0.9901395298735	0.964111802525232	1.01686991700577	0.467728987607995
CTBS_Q01459_OID30710_v1_Inflammation_II	8363_18_KIAA1324L_K132L	97	Weighted median	-0.00567537	0.0143794057241882	0.994340703341397	0.96670779466756	1.02276348631437	0.693073556841634
CTBS_Q01459_OID30710_v1_Inflammation_II	8363_18_KIAA1324L_K132L	97	Inverse variance weighted	0.0196195531346807	0.00957029212773193	1.01981328144746	1.00086215200389	1.0391232468271	0.0403597990175822
CTBS_Q01459_OID30710_v1_Inflammation_II	8363_18_KIAA1324L_K132L	97	Simple mode	0.0182130579237417	0.0274290748387871	1.0183799271903	0.965076478202336	1.07462745132483	0.508278394253129
CTBS_Q01459_OID30710_v1_Inflammation_II	8363_18_KIAA1324L_K132L	97	Weighted mode	-0.000800628	0.0126904489043346	0.999199692649197	0.974652864666046	1.02436473742099	0.949826805543141
CTBS_Q01459_OID30710_v1_Inflammation_II	8815_1_OLFML1_OLFL1	97	MR Egger	0.00209725341657863	0.0131050108805659	1.00209945419078	0.976687467670947	1.02817262361739	0.873193707349152
CTBS_Q01459_OID30710_v1_Inflammation_II	8815_1_OLFML1_OLFL1	97	Weighted median	0.0168953198727509	0.0130791356014574	1.01703885299618	0.991298295002322	1.04344780347005	0.196434559508303
CTBS_Q01459_OID30710_v1_Inflammation_II	8815_1_OLFML1_OLFL1	97	Inverse variance weighted	0.0270393267048836	0.00903004765023967	1.02740820654834	1.00938419129102	1.04575406667782	0.00275009933668306
CTBS_Q01459_OID30710_v1_Inflammation_II	8815_1_OLFML1_OLFL1	97	Simple mode	0.0175734787591287	0.0248680488218402	1.01772880085282	0.969312814765662	1.06856310605542	0.48148391357713
CTBS_Q01459_OID30710_v1_Inflammation_II	8815_1_OLFML1_OLFL1	97	Weighted mode	0.0093763593446935	0.0125501659317674	1.00942045511348	0.984893302628815	1.03455841610643	0.456822914984092
CTBS_Q01459_OID30710_v1_Inflammation_II	8932_1_ENTPD6_ENTP6	97	MR Egger	0.00757124324295609	0.0136407674270886	1.00759997757751	0.98101781365282	1.03490242550631	0.580168279159418
CTBS_Q01459_OID30710_v1_Inflammation_II	8932_1_ENTPD6_ENTP6	97	Weighted median	0.0226812435725387	0.0145664518894204	1.02294041874004	0.994148186818513	1.05256652294542	0.119449656723104
CTBS_Q01459_OID30710_v1_Inflammation_II	8932_1_ENTPD6_ENTP6	97	Inverse variance weighted	0.0280876222266733	0.00937506857550316	1.02848579868914	1.00975980710041	1.04755906371708	0.00273554397361419
CTBS_Q01459_OID30710_v1_Inflammation_II	8932_1_ENTPD6_ENTP6	97	Simple mode	0.0199749733406327	0.0255589581261409	1.02017580811482	0.970328519830191	1.07258382928378	0.436416761890012
CTBS_Q01459_OID30710_v1_Inflammation_II	8932_1_ENTPD6_ENTP6	97	Weighted mode	0.0199749733406327	0.0124914525043412	1.02017580811482	0.995501873443178	1.04546129668548	0.113086499233331
CTBS_Q01459_OID30710_v1_Inflammation_II	9060_27_IGSF9B_TUTLB	97	MR Egger	-0.00386597	0.0128980922383928	0.996141497001686	0.971274427524316	1.02164522603363	0.765036691225471
CTBS_Q01459_OID30710_v1_Inflammation_II	9060_27_IGSF9B_TUTLB	97	Weighted median	0.00668747518104757	0.0134675624058991	1.00670988627322	0.980484004460577	1.03363725518174	0.619498193632081
CTBS_Q01459_OID30710_v1_Inflammation_II	9060_27_IGSF9B_TUTLB	97	Inverse variance weighted	0.0181852492122097	0.00890052046603547	1.01835160775044	1.00074050313595	1.03627263387282	0.0410359146811755
CTBS_Q01459_OID30710_v1_Inflammation_II	9060_27_IGSF9B_TUTLB	97	Simple mode	0.0147772404355001	0.026007893103407	1.01488696365554	0.964449091743827	1.06796258902128	0.571237392785402
CTBS_Q01459_OID30710_v1_Inflammation_II	9060_27_IGSF9B_TUTLB	97	Weighted mode	0.00465095814269212	0.011932425654197	1.00466179063583	0.981437842715513	1.02843529119568	0.697566516967652
CTBS_Q01459_OID30710_v1_Inflammation_II	9095_5_MTFR1_MTFR1	97	MR Egger	0.0132571465641521	0.0185427218761737	1.01334541215031	0.977177867926729	1.0508515982917	0.476392337994454
CTBS_Q01459_OID30710_v1_Inflammation_II	9095_5_MTFR1_MTFR1	97	Weighted median	0.0273099979286322	0.0135394252914148	1.02768633402375	1.00077302298584	1.0553234118843	0.0436879825929909
CTBS_Q01459_OID30710_v1_Inflammation_II	9095_5_MTFR1_MTFR1	97	Inverse variance weighted	0.0258968257933279	0.0125432725106006	1.02623506202278	1.0013128727364	1.05177755245152	0.0389609737344831
CTBS_Q01459_OID30710_v1_Inflammation_II	9095_5_MTFR1_MTFR1	97	Simple mode	0.0529453408390239	0.0283278963704484	1.05437201245474	0.997425982431937	1.11456926150779	0.0646689932052165
CTBS_Q01459_OID30710_v1_Inflammation_II	9095_5_MTFR1_MTFR1	97	Weighted mode	0.0147809275032005	0.01220767923074	1.01489070561938	0.990895574777548	1.03946689295069	0.228948597051842
CTBS_Q01459_OID30710_v1_Inflammation_II	9177_6_FAM3B_FAM3B	97	MR Egger	0.0277227413340918	0.0173718269456994	1.02811059232989	0.993693927781522	1.06371928066498	0.113844843059178
CTBS_Q01459_OID30710_v1_Inflammation_II	9177_6_FAM3B_FAM3B	97	Weighted median	0.0176398203756975	0.0168870936283178	1.01779632086637	0.984659992050584	1.05204777195405	0.296219862118322
CTBS_Q01459_OID30710_v1_Inflammation_II	9177_6_FAM3B_FAM3B	97	Inverse variance weighted	0.057973207122568	0.0120066861520194	1.05968660327665	1.03504002996552	1.08492006555671	1.37627299892114e-06
CTBS_Q01459_OID30710_v1_Inflammation_II	9177_6_FAM3B_FAM3B	97	Simple mode	0.0380431969536476	0.0364347769334097	1.03877610387255	0.967181636765903	1.11567026601625	0.299040376704897
CTBS_Q01459_OID30710_v1_Inflammation_II	9177_6_FAM3B_FAM3B	97	Weighted mode	0.00673050145121368	0.0155101517795001	1.00675320217662	0.976608527042356	1.03782834372991	0.665304451884335
CTBS_Q01459_OID30710_v1_Inflammation_II	9321_400_NMB_NMB	97	MR Egger	-0.00600415	0.0128745868558814	0.994013839955875	0.969244536612842	1.01941612947002	0.642027876639784
CTBS_Q01459_OID30710_v1_Inflammation_II	9321_400_NMB_NMB	97	Weighted median	0.00677417668677388	0.0135446374384931	1.00679717332009	0.980420897091357	1.03388305085349	0.616978492583778
CTBS_Q01459_OID30710_v1_Inflammation_II	9321_400_NMB_NMB	97	Inverse variance weighted	0.0205821847710786	0.00896041101414706	1.02079545863698	1.00302434330957	1.03888143425874	0.0216180014954709
CTBS_Q01459_OID30710_v1_Inflammation_II	9321_400_NMB_NMB	97	Simple mode	0.0263186765907391	0.0263353155894892	1.02666807142828	0.975018784550091	1.08105335568139	0.320128732053815
CTBS_Q01459_OID30710_v1_Inflammation_II	9321_400_NMB_NMB	97	Weighted mode	0.00834663099694188	0.0134714436756261	1.00838156123708	0.982104659300796	1.03536152019365	0.53700238542592
CTBS_Q01459_OID30710_v1_Inflammation_II	9343_16_IL2RB_IL_2_sRb	97	MR Egger	0.0111190100683839	0.0131527169686827	1.01118105601075	0.98544662400525	1.03758752947898	0.400024308039333
CTBS_Q01459_OID30710_v1_Inflammation_II	9343_16_IL2RB_IL_2_sRb	97	Weighted median	0.0350353056186332	0.0134529148206193	1.03565627263956	1.00870526491488	1.06332736862257	0.00920645395269712
CTBS_Q01459_OID30710_v1_Inflammation_II	9343_16_IL2RB_IL_2_sRb	97	Inverse variance weighted	0.0320484044668158	0.00888344219343798	1.03256748497405	1.01474450111591	1.05070351192162	0.000308975642351686
CTBS_Q01459_OID30710_v1_Inflammation_II	9343_16_IL2RB_IL_2_sRb	97	Simple mode	0.0479883209021009	0.0232148712676689	1.04915840202923	1.00249026879866	1.09799903979875	0.0414126431138997
CTBS_Q01459_OID30710_v1_Inflammation_II	9343_16_IL2RB_IL_2_sRb	97	Weighted mode	0.0279622353496166	0.0124359489402045	1.02835684815127	1.00359421919703	1.05373046885994	0.0268312475237985
CTBS_Q01459_OID30710_v1_Inflammation_II	9783_75_DNAJC11_DJC11	97	MR Egger	-0.00389975	0.0139879964437541	0.996107848493349	0.969169055266077	1.02379542602879	0.781010201114879
CTBS_Q01459_OID30710_v1_Inflammation_II	9783_75_DNAJC11_DJC11	97	Weighted median	0.00866049934275177	0.0138208427047289	1.00869810996437	0.981740411457056	1.03639604234647	0.530904422974425
CTBS_Q01459_OID30710_v1_Inflammation_II	9783_75_DNAJC11_DJC11	97	Inverse variance weighted	0.020226719432246	0.00968386484280756	1.02043266571737	1.00124712135022	1.03998583672214	0.036734449125954
CTBS_Q01459_OID30710_v1_Inflammation_II	9783_75_DNAJC11_DJC11	97	Simple mode	-0.00192316	0.0262239665096854	0.998078687060241	0.948074554920992	1.05072017848523	0.941691323468874
CTBS_Q01459_OID30710_v1_Inflammation_II	9783_75_DNAJC11_DJC11	97	Weighted mode	0.00361150334737048	0.012214028776179	1.00361803268346	0.979877227669279	1.02793403814807	0.76810938220646
CTBS_Q01459_OID30710_v1_Inflammation_II	9931_20_KRT1_Keratin_1	97	MR Egger	0.00562988967542176	0.0126939797499986	1.00564576728672	0.980933793349546	1.03098029257242	0.658406313399045
CTBS_Q01459_OID30710_v1_Inflammation_II	9931_20_KRT1_Keratin_1	97	Weighted median	0.0136849796434228	0.0135012546781373	1.01377904759353	0.987303805889887	1.04096424141028	0.310769842650558
CTBS_Q01459_OID30710_v1_Inflammation_II	9931_20_KRT1_Keratin_1	97	Inverse variance weighted	0.0269963363143524	0.00876222795096812	1.02736403881771	1.00987076733263	1.04516033377585	0.00206313607784285
CTBS_Q01459_OID30710_v1_Inflammation_II	9931_20_KRT1_Keratin_1	97	Simple mode	0.00725212342280834	0.0226783949669721	1.00727848375414	0.963485798514764	1.05306164906435	0.749829128663099
CTBS_Q01459_OID30710_v1_Inflammation_II	9931_20_KRT1_Keratin_1	97	Weighted mode	0.0103661201613851	0.0122163077949488	1.01042003451818	0.986513920010523	1.03490546402511	0.398243898542906
CTBS_Q01459_OID30710_v1_Inflammation_II	9959_60_TMEM59L_TM59L	97	MR Egger	0.0202285818164337	0.0134574206819931	1.0204345661568	0.993870897332438	1.04770821502314	0.136116314162535
CTBS_Q01459_OID30710_v1_Inflammation_II	9959_60_TMEM59L_TM59L	97	Weighted median	0.0273397582043665	0.0138241727751098	1.02771691870753	1.00024440942827	1.05594398233268	0.0479650776428191
CTBS_Q01459_OID30710_v1_Inflammation_II	9959_60_TMEM59L_TM59L	97	Inverse variance weighted	0.0358330951122893	0.00917740012279086	1.03648283800165	1.01800557126791	1.05529547557774	9.44231005422424e-05
CTBS_Q01459_OID30710_v1_Inflammation_II	9959_60_TMEM59L_TM59L	97	Simple mode	0.0327954501560072	0.0247417422233408	1.03333914826048	0.984424212465787	1.08468461239194	0.188147516823029
CTBS_Q01459_OID30710_v1_Inflammation_II	9959_60_TMEM59L_TM59L	97	Weighted mode	0.0212454546604258	0.0116868774930577	1.02147274611524	0.998340553181045	1.04514092684261	0.0721999263208161
CTSS_P25774_OID21056_v1_Neurology	10574_10_AXL_AXL	73	MR Egger	0.00636976280947182	0.0194262160048372	1.00639009289161	0.968791732473605	1.04544762834046	0.743955882222452
CTSS_P25774_OID21056_v1_Neurology	10574_10_AXL_AXL	73	Weighted median	0.0122127683985828	0.0151361089314753	1.01228764877631	0.982697433688833	1.04276886123379	0.419745336424263
CTSS_P25774_OID21056_v1_Neurology	10574_10_AXL_AXL	73	Inverse variance weighted	0.0312806661390557	0.0118607188132192	1.03177504757104	1.00806601367841	1.05604170197711	0.00835607373354855
CTSS_P25774_OID21056_v1_Neurology	10574_10_AXL_AXL	73	Simple mode	0.0329805196472162	0.0291920450490702	1.03353040550829	0.976055442200653	1.09438977841438	0.262319759847061
CTSS_P25774_OID21056_v1_Neurology	10574_10_AXL_AXL	73	Weighted mode	0.0236611332407535	0.0162093875989332	1.02394327875341	0.991923524950106	1.05699664513654	0.148717180746652
CTSS_P25774_OID21056_v1_Neurology	11275_94_LRP1B_LRP1B	73	MR Egger	-0.00367873	0.0206609936410292	0.996328031235589	0.956787199305827	1.03750295420548	0.859189340050751
CTSS_P25774_OID21056_v1_Neurology	11275_94_LRP1B_LRP1B	73	Weighted median	0.0312050673923008	0.0159111550442313	1.03169704961883	1.00002	1.06437836220008	0.0498548898563778
CTSS_P25774_OID21056_v1_Neurology	11275_94_LRP1B_LRP1B	73	Inverse variance weighted	0.0274888329423383	0.0127120096286296	1.02787013675808	1.00257660783323	1.05380178410747	0.0305850353784297
CTSS_P25774_OID21056_v1_Neurology	11275_94_LRP1B_LRP1B	73	Simple mode	0.0525553579016742	0.0350152060371854	1.05396090552781	0.984054058507561	1.12883390986235	0.137746619004977
CTSS_P25774_OID21056_v1_Neurology	11275_94_LRP1B_LRP1B	73	Weighted mode	0.0172330671574804	0.0167813631504852	1.01738241312223	0.984463550827807	1.05140202870898	0.307897241273397
CTSS_P25774_OID21056_v1_Neurology	11327_56_CLK2_CLK2	73	MR Egger	0.00882515903715127	0.0156336870567434	1.00886421556197	0.978419398943893	1.04025636300761	0.574195498150268
CTSS_P25774_OID21056_v1_Neurology	11327_56_CLK2_CLK2	73	Weighted median	0.0231619508113721	0.0147187495145831	1.02343227181342	0.994329340991879	1.05338701354659	0.115571677392532
CTSS_P25774_OID21056_v1_Neurology	11327_56_CLK2_CLK2	73	Inverse variance weighted	0.0191692718413951	0.00946281053558244	1.01935418197389	1.00062235677532	1.03843667021022	0.0427905899330394
CTSS_P25774_OID21056_v1_Neurology	11327_56_CLK2_CLK2	73	Simple mode	0.0198169993854551	0.0258319516719358	1.02001465963641	0.969656275060195	1.07298836983093	0.445500288285078
CTSS_P25774_OID21056_v1_Neurology	11327_56_CLK2_CLK2	73	Weighted mode	0.0213147896251534	0.015052258194632	1.0215435723474	0.991845790966196	1.05213056274375	0.161071766109227
CTSS_P25774_OID21056_v1_Neurology	12781_2_TARBP2_TRBP2	73	MR Egger	0.0074066110307179	0.0162412878451069	1.00743410781828	0.97586959502978	1.04001957512022	0.649755985904353
CTSS_P25774_OID21056_v1_Neurology	12781_2_TARBP2_TRBP2	73	Weighted median	0.0265246560589312	0.0150170063505404	1.02687956575264	0.997095549712591	1.05755325341116	0.0773442169077831
CTSS_P25774_OID21056_v1_Neurology	12781_2_TARBP2_TRBP2	73	Inverse variance weighted	0.0200250079397153	0.00982008284190285	1.02022685347938	1.00077794801429	1.04005372483045	0.0414311375450284
CTSS_P25774_OID21056_v1_Neurology	12781_2_TARBP2_TRBP2	73	Simple mode	0.0219235250819149	0.0266965919341178	1.02216561144993	0.970055691603158	1.07707479712231	0.414237194944658
CTSS_P25774_OID21056_v1_Neurology	12781_2_TARBP2_TRBP2	73	Weighted mode	0.025461761288899	0.0154583639360239	1.02578868068347	0.995175045644518	1.05734405421798	0.10389165190459
CTSS_P25774_OID21056_v1_Neurology	13672_3_HSPA6_HSP76	73	MR Egger	0.00554858822941676	0.0172485938166346	1.0055640101552	0.972136885579947	1.04014053320915	0.748637624190661
CTSS_P25774_OID21056_v1_Neurology	13672_3_HSPA6_HSP76	73	Weighted median	0.0187662110483348	0.0154841245828518	1.0189434030589	0.98848414778729	1.05034123304996	0.225525927019088
CTSS_P25774_OID21056_v1_Neurology	13672_3_HSPA6_HSP76	73	Inverse variance weighted	0.0218032315972619	0.0104482322207279	1.02204265898198	1.00132557424253	1.04318837314141	0.0369074237121054
CTSS_P25774_OID21056_v1_Neurology	13672_3_HSPA6_HSP76	73	Simple mode	0.0231560337673739	0.0273812346683428	1.02342621613756	0.96994958197341	1.07985119983932	0.400527536248458
CTSS_P25774_OID21056_v1_Neurology	13672_3_HSPA6_HSP76	73	Weighted mode	0.0180139808255504	0.0158786260416114	1.01817721124826	0.986977411117816	1.05036328271299	0.260356274440824
CTSS_P25774_OID21056_v1_Neurology	13942_140_SPSB1_SPSB1	73	MR Egger	0.000826624305146017	0.0158618201261645	1.00082696605318	0.970190783171804	1.03243056247611	0.958584134230288
CTSS_P25774_OID21056_v1_Neurology	13942_140_SPSB1_SPSB1	73	Weighted median	0.0210664880137387	0.0146242043588322	1.02128995292061	0.99243183137818	1.05098721640976	0.149719772251203
CTSS_P25774_OID21056_v1_Neurology	13942_140_SPSB1_SPSB1	73	Inverse variance weighted	0.0193043295867828	0.00964972074498208	1.01949186294869	1.00039095332896	1.0389574747352	0.0454455930045329
CTSS_P25774_OID21056_v1_Neurology	13942_140_SPSB1_SPSB1	73	Simple mode	0.0175021817322616	0.0271759505979767	1.0176562424018	0.964869247695177	1.07333115877947	0.521601072793644
CTSS_P25774_OID21056_v1_Neurology	13942_140_SPSB1_SPSB1	73	Weighted mode	0.0214524765046012	0.015100909003372	1.02168423517759	0.991887777970966	1.05237578241534	0.159746919985866
CTSS_P25774_OID21056_v1_Neurology	15666_21_BMP2_BMP_2	73	MR Egger	0.0131306572852954	0.0178170369609634	1.01321724292608	0.978444967760179	1.04922526579375	0.4635677823204
CTSS_P25774_OID21056_v1_Neurology	15666_21_BMP2_BMP_2	73	Weighted median	0.0223751822088697	0.0145224164976876	1.02262738410688	0.993929744772684	1.05215360766213	0.123381515684727
CTSS_P25774_OID21056_v1_Neurology	15666_21_BMP2_BMP_2	73	Inverse variance weighted	0.0248318164577722	0.0107410667235347	1.02514269389563	1.00378647633632	1.04695327903129	0.0207855333935182
CTSS_P25774_OID21056_v1_Neurology	15666_21_BMP2_BMP_2	73	Simple mode	0.0149461192077369	0.0285235386997931	1.01505837099304	0.959867507904972	1.07342262139063	0.601893126760547
CTSS_P25774_OID21056_v1_Neurology	15666_21_BMP2_BMP_2	73	Weighted mode	0.0208212850192124	0.0155504879536567	1.02103956026565	0.990388814170473	1.05263889162627	0.184799892304252
CTSS_P25774_OID21056_v1_Neurology	2833_20_KLK4_Kallikrein_4	73	MR Egger	0.0101285574034282	0.0180040007280183	1.01018002485789	0.97515457311323	1.04646351538301	0.575498011457882
CTSS_P25774_OID21056_v1_Neurology	2833_20_KLK4_Kallikrein_4	73	Weighted median	0.0204411997738848	0.0147698621147568	1.02065155193669	0.991528358347849	1.05063015263281	0.166364454327242
CTSS_P25774_OID21056_v1_Neurology	2833_20_KLK4_Kallikrein_4	73	Inverse variance weighted	0.0325577825613837	0.0110083490866015	1.03309358621291	1.01104193544446	1.05562620150376	0.00310090823800229
CTSS_P25774_OID21056_v1_Neurology	2833_20_KLK4_Kallikrein_4	73	Simple mode	0.00794957761420739	0.0248845013403164	1.00798125940296	0.959998031529163	1.05836281527492	0.750303558309499
CTSS_P25774_OID21056_v1_Neurology	2833_20_KLK4_Kallikrein_4	73	Weighted mode	0.0184672595170474	0.0147446470855785	1.01863883389623	0.989621978402247	1.04850649699265	0.214450833609748
CTSS_P25774_OID21056_v1_Neurology	3181_50_CTSS_Cathepsin_S	73	MR Egger	0.468505140579162	0.10369848946158	1.59760421361116	1.30376482880857	1.9576684130071	2.43050459634502e-05
CTSS_P25774_OID21056_v1_Neurology	3181_50_CTSS_Cathepsin_S	73	Weighted median	0.119785642657935	0.0200295115189543	1.12725519025295	1.08385897759056	1.17238892718037	2.22511759230446e-09
CTSS_P25774_OID21056_v1_Neurology	3181_50_CTSS_Cathepsin_S	73	Inverse variance weighted	0.430952230442389	0.0650810202603799	1.53872204412987	1.35444724079958	1.74806774141567	3.54897807459778e-11
CTSS_P25774_OID21056_v1_Neurology	3181_50_CTSS_Cathepsin_S	73	Simple mode	0.133741504515616	0.0286368407485294	1.14309729596131	1.08070466573943	1.20909205767147	1.36053696571259e-05
CTSS_P25774_OID21056_v1_Neurology	3181_50_CTSS_Cathepsin_S	73	Weighted mode	0.0923817550668793	0.0184785220807991	1.09678344480738	1.05777098720627	1.13723475057742	3.90668951719541e-06
CTSS_P25774_OID21056_v1_Neurology	3580_25_SERPINA1_a1_Antitrypsin	73	MR Egger	-0.0296301	0.0186049316536681	0.970804538653308	0.936041190981864	1.00685895166778	0.115693650166556
CTSS_P25774_OID21056_v1_Neurology	3580_25_SERPINA1_a1_Antitrypsin	73	Weighted median	-0.0518798	0.0154056277197104	0.949442978234272	0.921203017536392	0.978548649709294	0.000758288574278069
CTSS_P25774_OID21056_v1_Neurology	3580_25_SERPINA1_a1_Antitrypsin	73	Inverse variance weighted	-0.0365637	0.01118778773567	0.964096695445588	0.943186024590236	0.985470961121283	0.00108242226609548
CTSS_P25774_OID21056_v1_Neurology	3580_25_SERPINA1_a1_Antitrypsin	73	Simple mode	-0.0430777	0.0299383578522454	0.957836966075377	0.903249124318045	1.01572382289677	0.154517762032788
CTSS_P25774_OID21056_v1_Neurology	3580_25_SERPINA1_a1_Antitrypsin	73	Weighted mode	-0.0499596	0.0156255047753144	0.951267831711605	0.922575914987422	0.980852061005338	0.002061696842819
CTSS_P25774_OID21056_v1_Neurology	5315_22_TNNT2_Troponin_T	73	MR Egger	0.00145547636805078	0.0184471753949907	1.00145653608785	0.965894187608719	1.0383282211854	0.937334363787547
CTSS_P25774_OID21056_v1_Neurology	5315_22_TNNT2_Troponin_T	73	Weighted median	0.024179861377813	0.0156249977995604	1.02447456472743	0.993575591019061	1.05633445835458	0.121739990659052
CTSS_P25774_OID21056_v1_Neurology	5315_22_TNNT2_Troponin_T	73	Inverse variance weighted	0.0288689501420896	0.0113256333835726	1.02928969736761	1.00669300744284	1.05239360289016	0.010803474423997
CTSS_P25774_OID21056_v1_Neurology	5315_22_TNNT2_Troponin_T	73	Simple mode	0.0412978569478497	0.0290361742629975	1.04216247465425	0.984508207116962	1.10319306200404	0.159260022415578
CTSS_P25774_OID21056_v1_Neurology	5315_22_TNNT2_Troponin_T	73	Weighted mode	0.0228548913913356	0.0145552605994054	1.02311806553606	0.994342644067663	1.05272622296889	0.12074964419576
CTSS_P25774_OID21056_v1_Neurology	5708_1_LEAP2_LEAP2	73	MR Egger	0.0434704228714334	0.0157457128993485	1.04442910264134	1.01268865198294	1.07716438641653	0.00733303877406317
CTSS_P25774_OID21056_v1_Neurology	5708_1_LEAP2_LEAP2	73	Weighted median	0.032309491047941	0.0143345529760293	1.03283710968465	1.00422265761497	1.06226690570324	0.0241987633975565
CTSS_P25774_OID21056_v1_Neurology	5708_1_LEAP2_LEAP2	73	Inverse variance weighted	0.023789831021922	0.00952909669689602	1.02407506646163	1.00512589416948	1.04338147871014	0.0125409298889297
CTSS_P25774_OID21056_v1_Neurology	5708_1_LEAP2_LEAP2	73	Simple mode	0.0499309681822939	0.0254826487112219	1.05119852772614	0.999984976821148	1.10503494583124	0.0539367843864448
CTSS_P25774_OID21056_v1_Neurology	5708_1_LEAP2_LEAP2	73	Weighted mode	0.0416951163833698	0.0154515633084313	1.04257656577601	1.01147539523118	1.07463404510879	0.00867354315467625
CTSS_P25774_OID21056_v1_Neurology	6119_14_MAMDC2_MAMC2	73	MR Egger	0.00654136984092476	0.017927275873296	1.00656281132736	0.971808907695287	1.04255958668874	0.716282898626016
CTSS_P25774_OID21056_v1_Neurology	6119_14_MAMDC2_MAMC2	73	Weighted median	0.0321046815606497	0.0152374867637325	1.03262559650645	1.00224171640115	1.06393059190275	0.0351215792060461
CTSS_P25774_OID21056_v1_Neurology	6119_14_MAMDC2_MAMC2	73	Inverse variance weighted	0.0224565993345551	0.0108018547474583	1.0227106468786	1.00128578994954	1.04459393885093	0.0376212365757081
CTSS_P25774_OID21056_v1_Neurology	6119_14_MAMDC2_MAMC2	73	Simple mode	0.0244644872201449	0.0292542875386298	1.0247661981646	0.967660558067597	1.08524187758344	0.405769833388639
CTSS_P25774_OID21056_v1_Neurology	6119_14_MAMDC2_MAMC2	73	Weighted mode	0.0306948732472336	0.0151887404329863	1.03117081807617	1.00092536988935	1.06233020766516	0.0470099102571287
CTSS_P25774_OID21056_v1_Neurology	7121_2_SYT7_SYT7	73	MR Egger	0.00224267333958586	0.0165727859559027	1.00224519001245	0.970212667049824	1.03533529814397	0.89273969678346
CTSS_P25774_OID21056_v1_Neurology	7121_2_SYT7_SYT7	73	Weighted median	0.0169939560945673	0.0144860565857375	1.01713917481368	0.988666004397539	1.04643236071527	0.240745655825006
CTSS_P25774_OID21056_v1_Neurology	7121_2_SYT7_SYT7	73	Inverse variance weighted	0.0213249244147607	0.0101131418338174	1.02155392552904	1.0015042967414	1.04200493813084	0.0349761029209413
CTSS_P25774_OID21056_v1_Neurology	7121_2_SYT7_SYT7	73	Simple mode	-0.00550563	0.0242492168384808	0.994509494490482	0.948347674471952	1.04291828962667	0.821033126457778
CTSS_P25774_OID21056_v1_Neurology	7121_2_SYT7_SYT7	73	Weighted mode	0.00811420195313639	0.0151135260378921	1.00814721131093	0.978721345160299	1.0384577844346	0.593003351116927
CTSS_P25774_OID21056_v1_Neurology	7765_15_ITM2A_ITM2A	73	MR Egger	0.00465448829867138	0.018626844935239	1.00466533725492	0.968647870594621	1.04202205003757	0.803401222317916
CTSS_P25774_OID21056_v1_Neurology	7765_15_ITM2A_ITM2A	73	Weighted median	0.0231939840227989	0.0154530670170012	1.02346505616086	0.992931075885317	1.05493799783474	0.133373464497461
CTSS_P25774_OID21056_v1_Neurology	7765_15_ITM2A_ITM2A	73	Inverse variance weighted	0.0235504347155407	0.0113170812849705	1.0238299360161	1.00136989284416	1.04679374262539	0.0374372338604011
CTSS_P25774_OID21056_v1_Neurology	7765_15_ITM2A_ITM2A	73	Simple mode	0.00849898927773574	0.0275300086298718	1.00853520822254	0.955557988823489	1.0644495447909	0.758428106357531
CTSS_P25774_OID21056_v1_Neurology	7765_15_ITM2A_ITM2A	73	Weighted mode	0.0217025884287809	0.014605900526205	1.02193980254644	0.993098945795358	1.05161823446731	0.141677101438102
CTSS_P25774_OID21056_v1_Neurology	8815_1_OLFML1_OLFL1	73	MR Egger	-0.00831714	0.0178499186996356	0.991717347728064	0.957621201559341	1.02702748872237	0.642678627183333
CTSS_P25774_OID21056_v1_Neurology	8815_1_OLFML1_OLFL1	73	Weighted median	0.0281001307393099	0.0144869159331384	1.02849866359721	0.999705818790139	1.05812078027257	0.05241733555171
CTSS_P25774_OID21056_v1_Neurology	8815_1_OLFML1_OLFL1	73	Inverse variance weighted	0.0229807084973168	0.0110600470610166	1.02324679938843	1.00130386555225	1.04567059858618	0.0377265948883879
CTSS_P25774_OID21056_v1_Neurology	8815_1_OLFML1_OLFL1	73	Simple mode	0.0150272242888635	0.0296409002396787	1.0151407007232	0.95784535375881	1.0758632781595	0.613720906438721
CTSS_P25774_OID21056_v1_Neurology	8815_1_OLFML1_OLFL1	73	Weighted mode	0.0191039655839469	0.0154545474304505	1.01928761394093	0.988875393830267	1.05063514211754	0.220424562125049
CTSS_P25774_OID21056_v1_Neurology	9177_6_FAM3B_FAM3B	73	MR Egger	-0.0182214	0.0169142169552456	0.981943630392605	0.949924054355895	1.0150425066585	0.285001187514111
CTSS_P25774_OID21056_v1_Neurology	9177_6_FAM3B_FAM3B	73	Weighted median	-0.0141179	0.0152617959674493	0.985981337239975	0.956924318768093	1.01592067242794	0.354942355317427
CTSS_P25774_OID21056_v1_Neurology	9177_6_FAM3B_FAM3B	73	Inverse variance weighted	-0.0209625	0.0100740471360117	0.979255638270208	0.960109747159979	0.998783324427814	0.0374479312552297
CTSS_P25774_OID21056_v1_Neurology	9177_6_FAM3B_FAM3B	73	Simple mode	-0.0180966	0.0254091145630543	0.982066202420072	0.934355379140054	1.03221327502115	0.478637977361065
CTSS_P25774_OID21056_v1_Neurology	9177_6_FAM3B_FAM3B	73	Weighted mode	-0.0142808	0.0157646970188625	0.985820729742254	0.955825835712925	1.01675689741602	0.368026514869596
CTSS_P25774_OID21056_v1_Neurology	9783_75_DNAJC11_DJC11	73	MR Egger	0.000111317242327207	0.0174383409119144	1.00011132343832	0.966505943402478	1.03488516143871	0.994924659425274
CTSS_P25774_OID21056_v1_Neurology	9783_75_DNAJC11_DJC11	73	Weighted median	0.0203271427171065	0.0149583456452913	1.02053514606326	0.991049085350931	1.05089848701244	0.174173049545263
CTSS_P25774_OID21056_v1_Neurology	9783_75_DNAJC11_DJC11	73	Inverse variance weighted	0.0212149578554185	0.0106065380279966	1.02144159493509	1.00042623413251	1.04289841296319	0.0454811092682787
CTSS_P25774_OID21056_v1_Neurology	9783_75_DNAJC11_DJC11	73	Simple mode	0.00270532630581483	0.0252264121555332	1.00270898900321	0.954336979879557	1.05353280636231	0.914895408872316
CTSS_P25774_OID21056_v1_Neurology	9783_75_DNAJC11_DJC11	73	Weighted mode	0.0112219491704244	0.0149398831154257	1.01128515143831	0.982101886697032	1.04133560007618	0.45501630117215
DDR1_Q08345_OID21009_v1_Neurology	10011_65_OCRL_OCRL	140	MR Egger	0.0283165742118339	0.0333455503362301	1.02872129951263	0.96363691024303	1.09820151223146	0.397248522365887
DDR1_Q08345_OID21009_v1_Neurology	10011_65_OCRL_OCRL	140	Weighted median	0.0389961134705387	0.0159790785052986	1.03976644255939	1.00770666424035	1.07284618970701	0.0146690492931434
DDR1_Q08345_OID21009_v1_Neurology	10011_65_OCRL_OCRL	140	Inverse variance weighted	0.056585320227183	0.0183513153045464	1.05821689825484	1.02083073534392	1.09697226482392	0.00204617100202015
DDR1_Q08345_OID21009_v1_Neurology	10011_65_OCRL_OCRL	140	Simple mode	0.0462150255400036	0.0421534919403853	1.04729958290557	0.964248903870776	1.13750341011658	0.274820994522479
DDR1_Q08345_OID21009_v1_Neurology	10011_65_OCRL_OCRL	140	Weighted mode	0.0136053425181146	0.0193374058034722	1.01369831635913	0.975996798444508	1.05285619607261	0.482873493248679
DDR1_Q08345_OID21009_v1_Neurology	10024_44_HOGA1_HOGA1	140	MR Egger	0.0295944586741624	0.0265236719573465	1.03003672678037	0.977856900302314	1.08500094255959	0.266457467028611
DDR1_Q08345_OID21009_v1_Neurology	10024_44_HOGA1_HOGA1	140	Weighted median	0.0299026098354755	0.0146475951891711	1.03035418270361	1.00119403555821	1.06036362993605	0.0412042434464801
DDR1_Q08345_OID21009_v1_Neurology	10024_44_HOGA1_HOGA1	140	Inverse variance weighted	0.0349918554887566	0.0145459104106298	1.03561127421761	1.00650292387287	1.06556144631934	0.0161452840717598
DDR1_Q08345_OID21009_v1_Neurology	10024_44_HOGA1_HOGA1	140	Simple mode	0.0686802451230131	0.0329246594850303	1.07109366696278	1.00415652702815	1.14249284103454	0.0388079010013525
DDR1_Q08345_OID21009_v1_Neurology	10024_44_HOGA1_HOGA1	140	Weighted mode	0.0122739370307051	0.0176135678965781	1.01234957092093	0.977997019941456	1.04790876950232	0.487063195298696
DDR1_Q08345_OID21009_v1_Neurology	11275_94_LRP1B_LRP1B	140	MR Egger	0.0217683008894758	0.0173811226860114	1.02200695893203	0.987776620335324	1.05742351317337	0.212538612902978
DDR1_Q08345_OID21009_v1_Neurology	11275_94_LRP1B_LRP1B	140	Weighted median	0.022318133066691	0.0157803551537462	1.02256904575594	0.991425608550645	1.05469078498672	0.157274268958647
DDR1_Q08345_OID21009_v1_Neurology	11275_94_LRP1B_LRP1B	140	Inverse variance weighted	0.0462965242866055	0.00960616302381772	1.04738493998709	1.02784918056786	1.06729200475277	1.43946870534746e-06
DDR1_Q08345_OID21009_v1_Neurology	11275_94_LRP1B_LRP1B	140	Simple mode	0.0466024528343018	0.030282728069103	1.04770541395923	0.987329264186957	1.11177362431712	0.126099146661597
DDR1_Q08345_OID21009_v1_Neurology	11275_94_LRP1B_LRP1B	140	Weighted mode	0.0204722802677617	0.0175070153828393	1.02068327478397	0.986253882814175	1.05631457130601	0.244253598537368
DDR1_Q08345_OID21009_v1_Neurology	11327_56_CLK2_CLK2	140	MR Egger	0.0465008095758575	0.0397539987609681	1.04759892717899	0.969071358911134	1.1324898854298	0.244132355013086
DDR1_Q08345_OID21009_v1_Neurology	11327_56_CLK2_CLK2	140	Weighted median	0.0315587835878884	0.0183868591825103	1.03206204212229	0.995530557409226	1.06993406768104	0.0860930496284781
DDR1_Q08345_OID21009_v1_Neurology	11327_56_CLK2_CLK2	140	Inverse variance weighted	0.0593930372880651	0.0218095062761494	1.06119224690814	1.01678572839064	1.10753815032434	0.00646404344927034
DDR1_Q08345_OID21009_v1_Neurology	11327_56_CLK2_CLK2	140	Simple mode	0.0790142954974502	0.0480029981631239	1.08221979283002	0.985041426925297	1.18898520202225	0.102017189212407
DDR1_Q08345_OID21009_v1_Neurology	11327_56_CLK2_CLK2	140	Weighted mode	0.0129988431743837	0.0249096171038115	1.01308369539796	0.964810078990339	1.0637726493853	0.602612053158543
DDR1_Q08345_OID21009_v1_Neurology	11358_15_GRB10_GRB10	140	MR Egger	0.0109600389677829	0.0206234489556722	1.01102032022188	0.970967850436262	1.0527249562818	0.59597120372763
DDR1_Q08345_OID21009_v1_Neurology	11358_15_GRB10_GRB10	140	Weighted median	0.0333738600842383	0.0164695862063982	1.03393701477236	1.00109406917721	1.06785744060495	0.042724491140689
DDR1_Q08345_OID21009_v1_Neurology	11358_15_GRB10_GRB10	140	Inverse variance weighted	0.0447135431347006	0.0114420149171351	1.04572826096009	1.02253740880824	1.06944507491919	9.31256289622636e-05
DDR1_Q08345_OID21009_v1_Neurology	11358_15_GRB10_GRB10	140	Simple mode	0.0603775253896526	0.0339370524956783	1.06223749248021	0.993879708254056	1.13529683829929	0.0774083724506988
DDR1_Q08345_OID21009_v1_Neurology	11358_15_GRB10_GRB10	140	Weighted mode	0.022362996129213	0.019278847404513	1.02261492236405	0.984694788926982	1.06199534231431	0.248047220375449
DDR1_Q08345_OID21009_v1_Neurology	11441_11_PYGL_PYGL	140	MR Egger	-0.00961588	0.0181423853570564	0.990430208259129	0.955830243032941	1.02628265278526	0.596947929947284
DDR1_Q08345_OID21009_v1_Neurology	11441_11_PYGL_PYGL	140	Weighted median	0.0143716296564197	0.0162251038221093	1.0144753980369	0.982721442530602	1.04725539576295	0.375744154854826
DDR1_Q08345_OID21009_v1_Neurology	11441_11_PYGL_PYGL	140	Inverse variance weighted	0.0293886525823308	0.0101873545066898	1.02982476075988	1.00946595920271	1.05059415645058	0.00391641353056814
DDR1_Q08345_OID21009_v1_Neurology	11441_11_PYGL_PYGL	140	Simple mode	0.0323780116488914	0.0286402822926551	1.03290788272877	0.976523032997343	1.09254841734606	0.260209958843275
DDR1_Q08345_OID21009_v1_Neurology	11441_11_PYGL_PYGL	140	Weighted mode	0.0138942766468921	0.01597413960951	1.01399125071634	0.982735728305855	1.04624084269508	0.385910270614991
DDR1_Q08345_OID21009_v1_Neurology	12560_9_NT5C_NT5C	140	MR Egger	-0.00174243	0.0177443188089736	0.998259085728573	0.964137561125221	1.03358819573073	0.921918683761891
DDR1_Q08345_OID21009_v1_Neurology	12560_9_NT5C_NT5C	140	Weighted median	0.0179788377480815	0.0164212852074972	1.01814142999638	0.985893560262751	1.05144410437046	0.273582526898442
DDR1_Q08345_OID21009_v1_Neurology	12560_9_NT5C_NT5C	140	Inverse variance weighted	0.0323064507473137	0.00991577930153091	1.03283396955411	1.01295471793652	1.05310335178453	0.00112166845721839
DDR1_Q08345_OID21009_v1_Neurology	12560_9_NT5C_NT5C	140	Simple mode	0.0206003968010764	0.0312814134814306	1.02081404956378	0.960106393957047	1.08536025834802	0.511273674309843
DDR1_Q08345_OID21009_v1_Neurology	12560_9_NT5C_NT5C	140	Weighted mode	0.0151479840810158	0.018488777725614	1.01526329630539	0.979130818990013	1.05272915613884	0.414013868601117
DDR1_Q08345_OID21009_v1_Neurology	12716_3_ZNF175_ZN175	140	MR Egger	0.0400771994970371	0.0281142738918877	1.04089112736224	0.985085561287694	1.09985810532554	0.156267585105161
DDR1_Q08345_OID21009_v1_Neurology	12716_3_ZNF175_ZN175	140	Weighted median	0.0437260974286329	0.0164444386707747	1.04469617072948	1.01156131899691	1.07891639255157	0.0078368224224079
DDR1_Q08345_OID21009_v1_Neurology	12716_3_ZNF175_ZN175	140	Inverse variance weighted	0.0556325566462694	0.0154402251067828	1.05720914788363	1.0256942654358	1.08969233818808	0.000314453768430906
DDR1_Q08345_OID21009_v1_Neurology	12716_3_ZNF175_ZN175	140	Simple mode	0.0631799140693681	0.033596387342132	1.06521846978194	0.997334553506256	1.13772292795374	0.0621244594529852
DDR1_Q08345_OID21009_v1_Neurology	12716_3_ZNF175_ZN175	140	Weighted mode	0.0361167583829114	0.0201771497234747	1.03677689181759	0.9965754222134	1.07860007325844	0.0756336060025274
DDR1_Q08345_OID21009_v1_Neurology	13111_79_BCL6_BCL6	140	MR Egger	0.0405390278521572	0.0332652942117708	1.04137195141999	0.975640648086596	1.1115317338726	0.225053082601204
DDR1_Q08345_OID21009_v1_Neurology	13111_79_BCL6_BCL6	140	Weighted median	0.0282175771220781	0.0165851646103868	1.02861946413859	0.995719840589373	1.06260612561309	0.0888726754698188
DDR1_Q08345_OID21009_v1_Neurology	13111_79_BCL6_BCL6	140	Inverse variance weighted	0.0551079500521648	0.0182181008335019	1.05665467444623	1.01958988449527	1.09506686757861	0.00248714586288326
DDR1_Q08345_OID21009_v1_Neurology	13111_79_BCL6_BCL6	140	Simple mode	0.103098267466301	0.0387459094478844	1.10860034307044	1.02752837743496	1.19606888495271	0.00871085640054952
DDR1_Q08345_OID21009_v1_Neurology	13111_79_BCL6_BCL6	140	Weighted mode	0.0190905972191957	0.0192623686871793	1.0192739878234	0.981509441935988	1.05849156193973	0.323367396217003
DDR1_Q08345_OID21009_v1_Neurology	13378_80_C5orf63_YD286	140	MR Egger	0.0438938649972492	0.0295412643239489	1.0448714515688	0.986090628708423	1.10715619692428	0.139599957339373
DDR1_Q08345_OID21009_v1_Neurology	13378_80_C5orf63_YD286	140	Weighted median	0.0362348644030392	0.0156645311049487	1.03689934864134	1.00554771533152	1.06922848395948	0.02071279963893
DDR1_Q08345_OID21009_v1_Neurology	13378_80_C5orf63_YD286	140	Inverse variance weighted	0.0466757009056349	0.0161482327544612	1.04778215917081	1.01513860995987	1.08147541853428	0.00384687572606003
DDR1_Q08345_OID21009_v1_Neurology	13378_80_C5orf63_YD286	140	Simple mode	0.0864221095366395	0.0376873131971058	1.09026644305198	1.01263412024995	1.17385035036327	0.0233407125923669
DDR1_Q08345_OID21009_v1_Neurology	13378_80_C5orf63_YD286	140	Weighted mode	0.0223116339407365	0.018460202023956	1.02256239997251	0.98622538823699	1.06023823185768	0.22885540090826
DDR1_Q08345_OID21009_v1_Neurology	13430_50_SLC14A1_UT1	140	MR Egger	0.0108068085953837	0.0242461615588794	1.01086541307025	0.963950178211853	1.06006400168652	0.656503658708651
DDR1_Q08345_OID21009_v1_Neurology	13430_50_SLC14A1_UT1	140	Weighted median	0.0273972317206512	0.0148951393250024	1.02778	0.99820437271479	1.05822365453677	0.0658651324271977
DDR1_Q08345_OID21009_v1_Neurology	13430_50_SLC14A1_UT1	140	Inverse variance weighted	0.0392334846413571	0.0133675526105888	1.04001328243242	1.01311838230613	1.06762215208629	0.00333570387251457
DDR1_Q08345_OID21009_v1_Neurology	13430_50_SLC14A1_UT1	140	Simple mode	0.0331207986566668	0.0320457448437167	1.03367539829929	0.970747523749351	1.10068251827454	0.303142632258993
DDR1_Q08345_OID21009_v1_Neurology	13430_50_SLC14A1_UT1	140	Weighted mode	0.0179556183100106	0.0180786996981422	1.01811778959896	0.982673232123064	1.05484081545436	0.322342245362185
DDR1_Q08345_OID21009_v1_Neurology	13645_14_DHX38_PRP16	140	MR Egger	0.0314040252217663	0.0304557010180101	1.0319023342453	0.972107242542914	1.0953754697223	0.304279974932999
DDR1_Q08345_OID21009_v1_Neurology	13645_14_DHX38_PRP16	140	Weighted median	0.0383701371821105	0.015969472115251	1.03911577709267	1.00709502308952	1.0721546363028	0.0162737340887006
DDR1_Q08345_OID21009_v1_Neurology	13645_14_DHX38_PRP16	140	Inverse variance weighted	0.0471524725107334	0.0167335545852609	1.04828183105785	1.01445822906583	1.08323316410764	0.00483479583109008
DDR1_Q08345_OID21009_v1_Neurology	13645_14_DHX38_PRP16	140	Simple mode	0.0708626234647332	0.0390473847050502	1.07343375112924	0.99434579497181	1.15881217971666	0.0717130063258769
DDR1_Q08345_OID21009_v1_Neurology	13645_14_DHX38_PRP16	140	Weighted mode	0.0190043053681599	0.0196887170813906	1.01918603657907	0.980604971314959	1.05928504091188	0.336101757650064
DDR1_Q08345_OID21009_v1_Neurology	13672_3_HSPA6_HSP76	140	MR Egger	0.0242202627714034	0.029657760921956	1.02451595576366	0.966659516298495	1.08583521489919	0.41553115148865
DDR1_Q08345_OID21009_v1_Neurology	13672_3_HSPA6_HSP76	140	Weighted median	0.0452105093362317	0.016590944626972	1.04624808171775	1.01277314642948	1.08082945559643	0.00642993127933793
DDR1_Q08345_OID21009_v1_Neurology	13672_3_HSPA6_HSP76	140	Inverse variance weighted	0.0501376567109305	0.0163680876700076	1.05141582085837	1.01822020372359	1.08569366852926	0.00219031470419923
DDR1_Q08345_OID21009_v1_Neurology	13672_3_HSPA6_HSP76	140	Simple mode	0.117942002904442	0.0380503227604728	1.12517885236952	1.04431729979836	1.21230151991549	0.00234590273170686
DDR1_Q08345_OID21009_v1_Neurology	13672_3_HSPA6_HSP76	140	Weighted mode	0.032894795832386	0.0193379955674451	1.03344181113656	0.995004842023801	1.07336359774184	0.0911705979569234
DDR1_Q08345_OID21009_v1_Neurology	13942_140_SPSB1_SPSB1	140	MR Egger	0.00872988671200049	0.0213814463395713	1.00876810330088	0.96736659671876	1.05194151802319	0.683691676479374
DDR1_Q08345_OID21009_v1_Neurology	13942_140_SPSB1_SPSB1	140	Weighted median	0.0120567586397098	0.0148552234461146	1.01212973434273	0.983085209661364	1.04203235800237	0.417011172597951
DDR1_Q08345_OID21009_v1_Neurology	13942_140_SPSB1_SPSB1	140	Inverse variance weighted	0.0307274996200209	0.0117641510316884	1.03120446198852	1.00769925157513	1.05525794602196	0.00900246143474139
DDR1_Q08345_OID21009_v1_Neurology	13942_140_SPSB1_SPSB1	140	Simple mode	0.0140140222952385	0.0291717488552595	1.01411267902618	0.957755641106943	1.07378592369661	0.631700274358114
DDR1_Q08345_OID21009_v1_Neurology	13942_140_SPSB1_SPSB1	140	Weighted mode	0.000125288008374969	0.0173761813641869	1.00012529585725	0.966637207185478	1.03477354272958	0.994257376582542
DDR1_Q08345_OID21009_v1_Neurology	14135_3_RXFP1_RXFP1	140	MR Egger	0.0109516043053315	0.0220760223850489	1.01101179264271	0.968199227286839	1.05571747637824	0.620622971123741
DDR1_Q08345_OID21009_v1_Neurology	14135_3_RXFP1_RXFP1	140	Weighted median	0.0041595739584793	0.0151994784171269	1.00416823699358	0.97469429207593	1.03453344949747	0.784341637414938
DDR1_Q08345_OID21009_v1_Neurology	14135_3_RXFP1_RXFP1	140	Inverse variance weighted	0.0291128565564648	0.0121666410505302	1.02954077834594	1.00528013111358	1.05438691313138	0.0167184131756462
DDR1_Q08345_OID21009_v1_Neurology	14135_3_RXFP1_RXFP1	140	Simple mode	0.0164758673023705	0.0301533867874268	1.01661234289174	0.958270893834589	1.07850573608076	0.585665707012518
DDR1_Q08345_OID21009_v1_Neurology	14135_3_RXFP1_RXFP1	140	Weighted mode	0.00586620628949519	0.0165780692127561	1.00588344617203	0.973724558610756	1.03910443496104	0.723984911007746
DDR1_Q08345_OID21009_v1_Neurology	14254_27_PTPN4_PTN4	140	MR Egger	0.0130428879902908	0.0202404515233195	1.0131283174655	0.973723012699698	1.05412830369968	0.520387648861825
DDR1_Q08345_OID21009_v1_Neurology	14254_27_PTPN4_PTN4	140	Weighted median	0.0235780435023248	0.0158003144711402	1.02385820310871	0.992636670267076	1.05606175096368	0.135633217160293
DDR1_Q08345_OID21009_v1_Neurology	14254_27_PTPN4_PTN4	140	Inverse variance weighted	0.0309872098209686	0.0111440865551606	1.03147231108663	1.00918674160915	1.05425000614053	0.00542591045692126
DDR1_Q08345_OID21009_v1_Neurology	14254_27_PTPN4_PTN4	140	Simple mode	0.00645840958075583	0.0339624645867511	1.00647931007834	0.94166280872314	1.07575725857685	0.849458714322045
DDR1_Q08345_OID21009_v1_Neurology	14254_27_PTPN4_PTN4	140	Weighted mode	0.0139048868488044	0.0200007818887562	1.01400200942532	0.975020633491179	1.05454186280858	0.488079804912008
DDR1_Q08345_OID21009_v1_Neurology	15305_7_SCGN_Secretagogin	140	MR Egger	0.0193356115853657	0.0301849055119464	1.01952375519053	0.960955859202609	1.08166122038145	0.522862907094949
DDR1_Q08345_OID21009_v1_Neurology	15305_7_SCGN_Secretagogin	140	Weighted median	0.00414640794979367	0.0181128401775133	1.00415501619289	0.969131704085784	1.0404440307693	0.818930384220216
DDR1_Q08345_OID21009_v1_Neurology	15305_7_SCGN_Secretagogin	140	Inverse variance weighted	-0.0404124	0.0169280251643257	0.960393276355478	0.929051277855646	0.992792612478515	0.0169722501067455
DDR1_Q08345_OID21009_v1_Neurology	15305_7_SCGN_Secretagogin	140	Simple mode	-0.0174197	0.0371182142626364	0.982731192767382	0.913774594595865	1.05689149484959	0.639589086980992
DDR1_Q08345_OID21009_v1_Neurology	15305_7_SCGN_Secretagogin	140	Weighted mode	0.00873026154484635	0.0200720997217751	1.00876848142037	0.969852720149872	1.04924575449962	0.664276811147728
DDR1_Q08345_OID21009_v1_Neurology	15447_45_SORD_Sorbitol_dehydrogenase	140	MR Egger	-0.00513513	0.0188814945408855	0.994878029746378	0.958732804487436	1.03238596764319	0.78605430548466
DDR1_Q08345_OID21009_v1_Neurology	15447_45_SORD_Sorbitol_dehydrogenase	140	Weighted median	0.023679779657352	0.0158475933189948	1.02396237180436	0.992645673138582	1.05626707217293	0.135118311997386
DDR1_Q08345_OID21009_v1_Neurology	15447_45_SORD_Sorbitol_dehydrogenase	140	Inverse variance weighted	0.0338238276974298	0.0105844222558944	1.03440235762984	1.01316425587729	1.05608565567059	0.0013952909069354
DDR1_Q08345_OID21009_v1_Neurology	15447_45_SORD_Sorbitol_dehydrogenase	140	Simple mode	0.0447720348255365	0.0296434372347271	1.04578942916312	0.986759336953555	1.10835083002697	0.13322348285708
DDR1_Q08345_OID21009_v1_Neurology	15447_45_SORD_Sorbitol_dehydrogenase	140	Weighted mode	0.0267987236457793	0.0179577744753787	1.02716103872676	0.991636654670836	1.06395804804982	0.137881808082701
DDR1_Q08345_OID21009_v1_Neurology	15585_304_FBLN5_fibulin_5	140	MR Egger	0.0359059278291519	0.0227420797871868	1.03655833061186	0.991368914983629	1.08380760837008	0.116664039739372
DDR1_Q08345_OID21009_v1_Neurology	15585_304_FBLN5_fibulin_5	140	Weighted median	0.0144396187810598	0.0151991103793602	1.01454437367595	0.984766582904838	1.04522259794938	0.342096743612119
DDR1_Q08345_OID21009_v1_Neurology	15585_304_FBLN5_fibulin_5	140	Inverse variance weighted	0.0296356136019548	0.0123943875667559	1.03007911873979	1.00535691118329	1.05540925721085	0.0168002159811028
DDR1_Q08345_OID21009_v1_Neurology	15585_304_FBLN5_fibulin_5	140	Simple mode	0.0284327822027086	0.0295616719735995	1.02884085209436	0.970923018118096	1.09021362063279	0.33781403862141
DDR1_Q08345_OID21009_v1_Neurology	15585_304_FBLN5_fibulin_5	140	Weighted mode	0.0142555495380632	0.0174120958452852	1.01435764444718	0.980323991563441	1.04957283480076	0.414350271329053
DDR1_Q08345_OID21009_v1_Neurology	15666_21_BMP2_BMP_2	140	MR Egger	0.0157744283003873	0.0212434076325948	1.01589950138119	0.974468923081494	1.05909154459535	0.459012388658071
DDR1_Q08345_OID21009_v1_Neurology	15666_21_BMP2_BMP_2	140	Weighted median	0.0220726036790594	0.015543137418001	1.02231800582443	0.99164316842195	1.05394171846714	0.155582423892327
DDR1_Q08345_OID21009_v1_Neurology	15666_21_BMP2_BMP_2	140	Inverse variance weighted	0.0428999207255631	0.0118017121714824	1.04383342353133	1.01996525691646	1.06826012816864	0.000277916962781968
DDR1_Q08345_OID21009_v1_Neurology	15666_21_BMP2_BMP_2	140	Simple mode	0.0443767380614346	0.0341802523295656	1.04537611368236	0.977637280568167	1.11780845593627	0.196329077677548
DDR1_Q08345_OID21009_v1_Neurology	15666_21_BMP2_BMP_2	140	Weighted mode	0.0180925152877648	0.017444843388578	1.01825717638795	0.984029524552147	1.05367537395532	0.301477592589212
DDR1_Q08345_OID21009_v1_Neurology	16773_29_SCUBE3_SCUB3	140	MR Egger	-0.000223547	0.0229010868358696	0.999776477493348	0.955892635987534	1.04567497155825	0.992225722053554
DDR1_Q08345_OID21009_v1_Neurology	16773_29_SCUBE3_SCUB3	140	Weighted median	0.000463085010832735	0.0156630318791765	1.00046319225125	0.970216091578292	1.03165326543009	0.976413598528245
DDR1_Q08345_OID21009_v1_Neurology	16773_29_SCUBE3_SCUB3	140	Inverse variance weighted	0.0298307768537233	0.0126678149343437	1.03028017194865	1.00501438976474	1.05618112886822	0.0185302908646473
DDR1_Q08345_OID21009_v1_Neurology	16773_29_SCUBE3_SCUB3	140	Simple mode	0.0344385622744894	0.0334902817873378	1.03503843601532	0.96927938074133	1.10525879876831	0.305587716612901
DDR1_Q08345_OID21009_v1_Neurology	16773_29_SCUBE3_SCUB3	140	Weighted mode	-0.017969	0.0182534603114083	0.982191496201048	0.947673007018227	1.01796730313655	0.326621826448996
DDR1_Q08345_OID21009_v1_Neurology	16900_29_MDGA1_MDGA1	140	MR Egger	0.0419999262403375	0.0481586329790631	1.04289440182722	0.948957757129137	1.14612976730697	0.384659785207444
DDR1_Q08345_OID21009_v1_Neurology	16900_29_MDGA1_MDGA1	140	Weighted median	0.108957631473432	0.0214892177283644	1.11511510355667	1.06912308392341	1.16308562866022	3.97106488675968e-07
DDR1_Q08345_OID21009_v1_Neurology	16900_29_MDGA1_MDGA1	140	Inverse variance weighted	0.0866271049525238	0.0261809147521502	1.09048996558466	1.03594340300227	1.14790862280169	0.000937006514766724
DDR1_Q08345_OID21009_v1_Neurology	16900_29_MDGA1_MDGA1	140	Simple mode	0.130643831930553	0.0480431050942432	1.13956183348521	1.03715288238472	1.25208269136783	0.00737668807318087
DDR1_Q08345_OID21009_v1_Neurology	16900_29_MDGA1_MDGA1	140	Weighted mode	0.113011653577173	0.0278648447552142	1.11964498074175	1.06013531735338	1.18249516111755	8.29090373829838e-05
DDR1_Q08345_OID21009_v1_Neurology	17231_1_LCP1_L_plastin	140	MR Egger	0.0271413465565438	0.0221951427676655	1.02751302792801	0.983771983105845	1.07319891264701	0.223470315724321
DDR1_Q08345_OID21009_v1_Neurology	17231_1_LCP1_L_plastin	140	Weighted median	0.0198805994405393	0.0163055224006318	1.02007953468795	0.987994424504067	1.05320660854084	0.222747196235651
DDR1_Q08345_OID21009_v1_Neurology	17231_1_LCP1_L_plastin	140	Inverse variance weighted	0.0339268051105441	0.0121522412875398	1.03450888319352	1.0101596747676	1.05944501264368	0.00524133721449432
DDR1_Q08345_OID21009_v1_Neurology	17231_1_LCP1_L_plastin	140	Simple mode	0.0386983621901124	0.0334107824491382	1.03945689685588	0.973568812098438	1.10980408060977	0.248744273126555
DDR1_Q08345_OID21009_v1_Neurology	17231_1_LCP1_L_plastin	140	Weighted mode	0.0214218212277834	0.0185370217731814	1.02165291564459	0.985199873193046	1.05945474461158	0.249817669387997
DDR1_Q08345_OID21009_v1_Neurology	17427_26_NLGN3_NLGN3	140	MR Egger	0.00388185033493981	0.0223211224414838	1.00388939447453	0.960916704477444	1.04878384530373	0.86219161301935
DDR1_Q08345_OID21009_v1_Neurology	17427_26_NLGN3_NLGN3	140	Weighted median	0.0121725113665829	0.0156657548122956	1.0122468979003	0.98163830034474	1.04380990630555	0.437150489594676
DDR1_Q08345_OID21009_v1_Neurology	17427_26_NLGN3_NLGN3	140	Inverse variance weighted	0.0299488381065808	0.0123344637375737	1.03040181529708	1.00578998673272	1.05561589891794	0.0151797636022368
DDR1_Q08345_OID21009_v1_Neurology	17427_26_NLGN3_NLGN3	140	Simple mode	0.0206888615624961	0.0336983976691207	1.0209043596297	0.95565338671736	1.0906105979397	0.540257142400312
DDR1_Q08345_OID21009_v1_Neurology	17427_26_NLGN3_NLGN3	140	Weighted mode	-0.00126522	0.0171390161036288	0.998735577689668	0.965742837547417	1.03285545112224	0.941258802412811
DDR1_Q08345_OID21009_v1_Neurology	17712_7_IDI1_IDI1	140	MR Egger	0.0104715555951495	0.0198171568215002	1.01052657420923	0.972028579889961	1.05054931337374	0.598064539028964
DDR1_Q08345_OID21009_v1_Neurology	17712_7_IDI1_IDI1	140	Weighted median	0.0347906114778707	0.0160564878250541	1.03540288462035	1.00332541229685	1.06850591078516	0.0302528932328317
DDR1_Q08345_OID21009_v1_Neurology	17712_7_IDI1_IDI1	140	Inverse variance weighted	0.0493466544814798	0.011046210282595	1.05058447744058	1.02808318428826	1.07357824844028	7.92157138828422e-06
DDR1_Q08345_OID21009_v1_Neurology	17712_7_IDI1_IDI1	140	Simple mode	0.0531948045167123	0.0370532968396587	1.05463507278525	0.980757881930512	1.13407718381972	0.153354333347257
DDR1_Q08345_OID21009_v1_Neurology	17712_7_IDI1_IDI1	140	Weighted mode	0.0202338226350409	0.019649158153644	1.02043991408327	0.981887511745767	1.06050602110509	0.304913445759557
DDR1_Q08345_OID21009_v1_Neurology	19277_4_TSTD1_KAT	140	MR Egger	0.000153860072217306	0.0189803513516853	1.00015387190929	0.963630237918978	1.03806182925036	0.993543900773939
DDR1_Q08345_OID21009_v1_Neurology	19277_4_TSTD1_KAT	140	Weighted median	0.024036384643455	0.0150236753849574	1.02432758700664	0.994604588687634	1.05493883442395	0.109620674895401
DDR1_Q08345_OID21009_v1_Neurology	19277_4_TSTD1_KAT	140	Inverse variance weighted	0.0407586170408278	0.0107344258643466	1.04160065055092	1.01991484890601	1.06374754362272	0.00014645767748847
DDR1_Q08345_OID21009_v1_Neurology	19277_4_TSTD1_KAT	140	Simple mode	0.0272727465245215	0.0370760943692943	1.02764805197786	0.955618601022173	1.10510670010429	0.463220606771489
DDR1_Q08345_OID21009_v1_Neurology	19277_4_TSTD1_KAT	140	Weighted mode	0.0117984277414291	0.0176228297132597	1.01186830372854	0.977514338687134	1.04742961158565	0.504289197026347
DDR1_Q08345_OID21009_v1_Neurology	2516_57_CCL21_6Ckine	140	MR Egger	-0.0215765	0.0276832879450604	0.978654567927356	0.926968416331398	1.03322264971612	0.437074758225224
DDR1_Q08345_OID21009_v1_Neurology	2516_57_CCL21_6Ckine	140	Weighted median	-0.0358846	0.0184579551220485	0.964751582552065	0.93047299046159	1.00029299676392	0.0518799468677395
DDR1_Q08345_OID21009_v1_Neurology	2516_57_CCL21_6Ckine	140	Inverse variance weighted	-0.0379111	0.0152315266227543	0.962798529315209	0.934480150798563	0.991975064702418	0.0128106967982364
DDR1_Q08345_OID21009_v1_Neurology	2516_57_CCL21_6Ckine	140	Simple mode	-0.035252	0.0362691482348144	0.965362114757645	0.89911931815635	1.03648536272168	0.332760998220036
DDR1_Q08345_OID21009_v1_Neurology	2516_57_CCL21_6Ckine	140	Weighted mode	-0.035252	0.0199449550715369	0.965362114757645	0.928352182192025	1.00384749504104	0.079344798703798
DDR1_Q08345_OID21009_v1_Neurology	2833_20_KLK4_Kallikrein_4	140	MR Egger	-0.00867334	0.0191444701607259	0.991364162248075	0.954854310877238	1.02927000589955	0.651226487703548
DDR1_Q08345_OID21009_v1_Neurology	2833_20_KLK4_Kallikrein_4	140	Weighted median	-0.00170185	0.014591161835528	0.998299599368922	0.970153934076894	1.02726181391866	0.907148877788667
DDR1_Q08345_OID21009_v1_Neurology	2833_20_KLK4_Kallikrein_4	140	Inverse variance weighted	0.0252428570052482	0.0106499891753345	1.02556415572278	1.00437843568344	1.04719675386866	0.0177773244883665
DDR1_Q08345_OID21009_v1_Neurology	2833_20_KLK4_Kallikrein_4	140	Simple mode	0.00430823022362548	0.0315869968326178	1.00431752398922	0.944025327169058	1.06846041092625	0.891708326525367
DDR1_Q08345_OID21009_v1_Neurology	2833_20_KLK4_Kallikrein_4	140	Weighted mode	-0.00911504	0.0169916939346239	0.990926372426594	0.958468324717745	1.02448359559477	0.592511205228404
DDR1_Q08345_OID21009_v1_Neurology	2997_8_JAM2_JAM_B	140	MR Egger	0.0240644871829747	0.0227954544859885	1.02435637361762	0.979596424755077	1.07116150452815	0.292963455532083
DDR1_Q08345_OID21009_v1_Neurology	2997_8_JAM2_JAM_B	140	Weighted median	0.0514437768117783	0.0154496863810523	1.05278999341819	1.0213879028894	1.08515752644613	0.000869202824151714
DDR1_Q08345_OID21009_v1_Neurology	2997_8_JAM2_JAM_B	140	Inverse variance weighted	0.0508840135942131	0.0125942720843199	1.05220084521118	1.02654545733363	1.07849741163806	5.33941495541443e-05
DDR1_Q08345_OID21009_v1_Neurology	2997_8_JAM2_JAM_B	140	Simple mode	0.072646537265931	0.0344108334212427	1.07535037344877	1.00521485402352	1.15037936521514	0.0365492450737728
DDR1_Q08345_OID21009_v1_Neurology	2997_8_JAM2_JAM_B	140	Weighted mode	0.0340233163980577	0.0197020451034094	1.03460872979586	0.99541783827835	1.0753426175496	0.0864084603431064
DDR1_Q08345_OID21009_v1_Neurology	3054_3_HP_Haptoglobin__Mixed_Type	140	MR Egger	0.0696191373798668	0.0212463674414686	1.07209978075537	1.02837126771267	1.11768772230698	0.00132833217635888
DDR1_Q08345_OID21009_v1_Neurology	3054_3_HP_Haptoglobin__Mixed_Type	140	Weighted median	0.0404612655802182	0.01581724255912	1.04129097511961	1.00950435236121	1.07407847457955	0.0105261563914678
DDR1_Q08345_OID21009_v1_Neurology	3054_3_HP_Haptoglobin__Mixed_Type	140	Inverse variance weighted	0.0384200356988091	0.0117714855252669	1.03916762872228	1.01546630833138	1.06342214579106	0.0010992012507113
DDR1_Q08345_OID21009_v1_Neurology	3054_3_HP_Haptoglobin__Mixed_Type	140	Simple mode	0.0570961772763967	0.0338618940622367	1.05875763392446	0.990769727838023	1.13141095846702	0.0940105719313659
DDR1_Q08345_OID21009_v1_Neurology	3054_3_HP_Haptoglobin__Mixed_Type	140	Weighted mode	0.0497808137758025	0.0164112357571586	1.05104069748486	1.01777084708274	1.08539810403868	0.0028869302578526
DDR1_Q08345_OID21009_v1_Neurology	3181_50_CTSS_Cathepsin_S	140	MR Egger	-0.0132208	0.0235102199908563	0.986866199688982	0.942423205509318	1.03340504605067	0.5747945562036
DDR1_Q08345_OID21009_v1_Neurology	3181_50_CTSS_Cathepsin_S	140	Weighted median	-0.0339859	0.0154786343833911	0.966585128054057	0.937701108027144	0.996358862944026	0.0281158849129001
DDR1_Q08345_OID21009_v1_Neurology	3181_50_CTSS_Cathepsin_S	140	Inverse variance weighted	-0.0296166	0.0128390371684963	0.970817654498176	0.946692325339845	0.995557789007114	0.0210680190950771
DDR1_Q08345_OID21009_v1_Neurology	3181_50_CTSS_Cathepsin_S	140	Simple mode	-0.0283434	0.0346434105679559	0.972054521911888	0.90824195255442	1.04035052654401	0.414673877910406
DDR1_Q08345_OID21009_v1_Neurology	3181_50_CTSS_Cathepsin_S	140	Weighted mode	-0.039206	0.0175107841709412	0.961552575234249	0.929110899654193	0.995127013668376	0.0267471984483253
DDR1_Q08345_OID21009_v1_Neurology	3327_27_NTN4_NET4	140	MR Egger	0.017173589392462	0.0245424018140585	1.01732190328964	0.969543905903336	1.06745434488454	0.48526022118388
DDR1_Q08345_OID21009_v1_Neurology	3327_27_NTN4_NET4	140	Weighted median	0.0101594729637356	0.0169785264274619	1.01021125562213	0.977146744798229	1.04439459724789	0.549591817159457
DDR1_Q08345_OID21009_v1_Neurology	3327_27_NTN4_NET4	140	Inverse variance weighted	0.0398945798899209	0.0134843137236054	1.04070105758927	1.01355639076456	1.06857270215665	0.00309048185829746
DDR1_Q08345_OID21009_v1_Neurology	3327_27_NTN4_NET4	140	Simple mode	0.0411822448645928	0.0353425542192867	1.04204199504405	0.972301671153064	1.11678458615386	0.245921179022224
DDR1_Q08345_OID21009_v1_Neurology	3327_27_NTN4_NET4	140	Weighted mode	0.0161364715826118	0.0184797214454878	1.0162673675588	0.980116553300041	1.05375157565442	0.38406069785959
DDR1_Q08345_OID21009_v1_Neurology	3432_21_EPHA3_EPHA3	140	MR Egger	0.00373311743863888	0.0212268055432881	1.00374009420053	0.962836733106455	1.0463811174457	0.860655393662169
DDR1_Q08345_OID21009_v1_Neurology	3432_21_EPHA3_EPHA3	140	Weighted median	0.0192370669752337	0.015716190821057	1.01942329156971	0.988499969690048	1.05131399014679	0.220941440464299
DDR1_Q08345_OID21009_v1_Neurology	3432_21_EPHA3_EPHA3	140	Inverse variance weighted	0.035392165919501	0.011763711795672	1.03602592320149	1.01241168428836	1.06019095808835	0.00262464500922292
DDR1_Q08345_OID21009_v1_Neurology	3432_21_EPHA3_EPHA3	140	Simple mode	0.0244270864642671	0.0369903774808391	1.02472787185091	0.953063206895037	1.10178129189257	0.510113595354735
DDR1_Q08345_OID21009_v1_Neurology	3432_21_EPHA3_EPHA3	140	Weighted mode	0.0092612492920312	0.0179031228306395	1.00930426735905	0.974501840421486	1.04534959489516	0.605770377873897
DDR1_Q08345_OID21009_v1_Neurology	4430_44_COLEC11_Collectin_Kidney_1	140	MR Egger	0.0239393692331436	0.0228280758581876	1.02422821626582	0.979411243836098	1.07109597280733	0.296158093120003
DDR1_Q08345_OID21009_v1_Neurology	4430_44_COLEC11_Collectin_Kidney_1	140	Weighted median	0.0314979340475413	0.0171046988384799	1.03199924353207	0.997974777859525	1.06718372275404	0.0655514779624523
DDR1_Q08345_OID21009_v1_Neurology	4430_44_COLEC11_Collectin_Kidney_1	140	Inverse variance weighted	0.0480999737747226	0.01261846537035	1.04927555011849	1.02364294741604	1.07555000779875	0.000137918342433054
DDR1_Q08345_OID21009_v1_Neurology	4430_44_COLEC11_Collectin_Kidney_1	140	Simple mode	0.0769642556598316	0.0363763181893978	1.08000347169118	1.0056827579647	1.15981654217238	0.0361466930976499
DDR1_Q08345_OID21009_v1_Neurology	4430_44_COLEC11_Collectin_Kidney_1	140	Weighted mode	0.0277519145114649	0.0191093761330068	1.02814058602006	0.990344454322561	1.06737919317654	0.148680954148255
DDR1_Q08345_OID21009_v1_Neurology	4931_59_F3_TF	140	MR Egger	0.0201138523239657	0.0260651952319766	1.02031749893259	0.969500847313046	1.07379771922149	0.441626498275987
DDR1_Q08345_OID21009_v1_Neurology	4931_59_F3_TF	140	Weighted median	0.0128028355765957	0.016486029400044	1.01288514275602	0.98067930209024	1.0461486341449	0.437402493019846
DDR1_Q08345_OID21009_v1_Neurology	4931_59_F3_TF	140	Inverse variance weighted	0.0453001909656631	0.0143123398889861	1.04634191515801	1.01739761051348	1.07610966656779	0.00155022065668451
DDR1_Q08345_OID21009_v1_Neurology	4931_59_F3_TF	140	Simple mode	0.0664899478346098	0.0329392523438724	1.0687502207672	1.00193087498358	1.14002578711695	0.0454562368044642
DDR1_Q08345_OID21009_v1_Neurology	4931_59_F3_TF	140	Weighted mode	0.0160622756536909	0.0182337866049121	1.01619196745466	0.980516361988868	1.0531656122747	0.379888614206002
DDR1_Q08345_OID21009_v1_Neurology	5005_4_MAPK12_MK12	140	MR Egger	-0.00667751	0.0198722774223526	0.993344731380956	0.955398089781285	1.03279854326294	0.737364967922163
DDR1_Q08345_OID21009_v1_Neurology	5005_4_MAPK12_MK12	140	Weighted median	0.00929438582040737	0.015710779422978	1.00933771275267	0.978730708859756	1.04090186316079	0.554123218314991
DDR1_Q08345_OID21009_v1_Neurology	5005_4_MAPK12_MK12	140	Inverse variance weighted	0.0364369468076945	0.011114315800777	1.03710890892861	1.01476076767217	1.05994922472857	0.00104404871491361
DDR1_Q08345_OID21009_v1_Neurology	5005_4_MAPK12_MK12	140	Simple mode	0.00695667202465944	0.0332826640583883	1.0069809258769	0.943388262858323	1.07486029347832	0.834740280629748
DDR1_Q08345_OID21009_v1_Neurology	5005_4_MAPK12_MK12	140	Weighted mode	0.00695667202465944	0.0191520323534147	1.0069809258769	0.969881566444522	1.04549938895854	0.71698179286784
DDR1_Q08345_OID21009_v1_Neurology	5337_64_CD86_B7_2	140	MR Egger	0.000247674196117055	0.0216365369545002	1.0002477048699	0.958716432895875	1.04357809751465	0.990883318952296
DDR1_Q08345_OID21009_v1_Neurology	5337_64_CD86_B7_2	140	Weighted median	0.00435978189641904	0.0156487919941567	1.00436929957215	0.974031290181954	1.03565224248043	0.78055041749879
DDR1_Q08345_OID21009_v1_Neurology	5337_64_CD86_B7_2	140	Inverse variance weighted	0.0315405332840341	0.0121305412358904	1.0320432068483	1.00779489570479	1.05687495078733	0.00931985455430048
DDR1_Q08345_OID21009_v1_Neurology	5337_64_CD86_B7_2	140	Simple mode	0.0416929352930504	0.0351323493597477	1.04257429182483	0.973199220097992	1.11689480583904	0.237354837314924
DDR1_Q08345_OID21009_v1_Neurology	5337_64_CD86_B7_2	140	Weighted mode	-0.00352307	0.0182245369214067	0.996483129203304	0.961516876456553	1.03272095487934	0.846994764816996
DDR1_Q08345_OID21009_v1_Neurology	5491_12_SPOCK2_Testican_2	140	MR Egger	0.0355785786448465	0.0315746025987589	1.03621906961928	0.974035388878604	1.10237263707518	0.261778365258979
DDR1_Q08345_OID21009_v1_Neurology	5491_12_SPOCK2_Testican_2	140	Weighted median	0.0746315240556046	0.0196468243934223	1.0774870496698	1.03678413876988	1.11978790839104	0.000145482947109583
DDR1_Q08345_OID21009_v1_Neurology	5491_12_SPOCK2_Testican_2	140	Inverse variance weighted	0.105851020626401	0.0176372402450055	1.11165625031756	1.07388405040976	1.15075702856242	1.95426257648812e-09
DDR1_Q08345_OID21009_v1_Neurology	5491_12_SPOCK2_Testican_2	140	Simple mode	0.0439921804734866	0.045432103945238	1.04497418365316	0.955945148847629	1.14229466598365	0.334573370379539
DDR1_Q08345_OID21009_v1_Neurology	5491_12_SPOCK2_Testican_2	140	Weighted mode	0.050947146380097	0.0202308482290106	1.0522672756788	1.01135870961609	1.09483055708769	0.0129261683950449
DDR1_Q08345_OID21009_v1_Neurology	5660_51_SOD3_SOD3	140	MR Egger	-0.0229548	0.0232545232957196	0.977306661118925	0.933762027761061	1.02288193508746	0.325315780566313
DDR1_Q08345_OID21009_v1_Neurology	5660_51_SOD3_SOD3	140	Weighted median	0.0292724222827727	0.0164277286438586	1.02970507087538	0.997078350490099	1.06339941336134	0.074767003902252
DDR1_Q08345_OID21009_v1_Neurology	5660_51_SOD3_SOD3	140	Inverse variance weighted	0.0330762485542562	0.0131396784864238	1.0336293489802	1.0073493536251	1.06059494377841	0.0118264835116844
DDR1_Q08345_OID21009_v1_Neurology	5660_51_SOD3_SOD3	140	Simple mode	0.0710047558958568	0.0336832566630269	1.07359	1.00499802148386	1.1468556027169	0.0368246509587516
DDR1_Q08345_OID21009_v1_Neurology	5660_51_SOD3_SOD3	140	Weighted mode	0.0314316393688924	0.0193319311191352	1.03193082974161	0.993561868528075	1.07178150762649	0.106237661416611
DDR1_Q08345_OID21009_v1_Neurology	6119_14_MAMDC2_MAMC2	140	MR Egger	0.0092909553091555	0.0228239427825785	1.00933425021423	0.965176809115678	1.05551192178865	0.684586861139935
DDR1_Q08345_OID21009_v1_Neurology	6119_14_MAMDC2_MAMC2	140	Weighted median	0.0142678974891454	0.0153694707578496	1.01437016976309	0.98426878356888	1.04539213117612	0.35323787783887
DDR1_Q08345_OID21009_v1_Neurology	6119_14_MAMDC2_MAMC2	140	Inverse variance weighted	0.0328088083376782	0.0125823634302785	1.03335295188474	1.00818065620296	1.05915375047024	0.00911998100010818
DDR1_Q08345_OID21009_v1_Neurology	6119_14_MAMDC2_MAMC2	140	Simple mode	0.030939903954446	0.029690447646477	1.03142351754928	0.973114648886695	1.09322624396912	0.29918238416063
DDR1_Q08345_OID21009_v1_Neurology	6119_14_MAMDC2_MAMC2	140	Weighted mode	0.0124313226860182	0.0176030901107449	1.01250891276028	0.978171042721033	1.04805218478685	0.481245054498476
DDR1_Q08345_OID21009_v1_Neurology	6604_59_NDNF_CD031	140	MR Egger	0.0217872344003265	0.0244846229342463	1.02202630929506	0.974137683450762	1.07226914083761	0.375103966298241
DDR1_Q08345_OID21009_v1_Neurology	6604_59_NDNF_CD031	140	Weighted median	0.0290777816016465	0.015179038563694	1.02950466788294	0.999327092520661	1.06059354252007	0.0554091876300365
DDR1_Q08345_OID21009_v1_Neurology	6604_59_NDNF_CD031	140	Inverse variance weighted	0.0479319540945973	0.0135040987904925	1.04909926598621	1.02169592735865	1.07723760115024	0.000386055156510629
DDR1_Q08345_OID21009_v1_Neurology	6604_59_NDNF_CD031	140	Simple mode	0.0436198487986368	0.0288558033558536	1.04458517908904	0.987145804259195	1.10536679755363	0.132893318757319
DDR1_Q08345_OID21009_v1_Neurology	6604_59_NDNF_CD031	140	Weighted mode	0.021050268600183	0.0177431181786383	1.02127338833084	0.986367532292621	1.05741450277515	0.23749194972056
DDR1_Q08345_OID21009_v1_Neurology	6626_81_CHST12_CHSTC	140	MR Egger	-0.0183135	0.0244999343103732	0.981853207363811	0.935818869814945	1.03015204320601	0.456039418128716
DDR1_Q08345_OID21009_v1_Neurology	6626_81_CHST12_CHSTC	140	Weighted median	0.00471674888294147	0.0152919129312787	1.00472789025308	0.975060849232582	1.03529757578403	0.7577420135548
DDR1_Q08345_OID21009_v1_Neurology	6626_81_CHST12_CHSTC	140	Inverse variance weighted	0.0417070246980136	0.0138417922114807	1.04258898117972	1.01468387620073	1.07126151225284	0.00258573955557216
DDR1_Q08345_OID21009_v1_Neurology	6626_81_CHST12_CHSTC	140	Simple mode	-0.00853038	0.0295507334007005	0.991505899197332	0.935709869783176	1.05062902496787	0.773264714573848
DDR1_Q08345_OID21009_v1_Neurology	6626_81_CHST12_CHSTC	140	Weighted mode	-0.00853038	0.0170101962588987	0.991505899197332	0.95899409081523	1.02511992259243	0.616822211097169
DDR1_Q08345_OID21009_v1_Neurology	7738_299_STX2_STX2	140	MR Egger	0.0153148289263392	0.0257315503110779	1.01543270188485	0.965490506700525	1.06795827084916	0.552699837844345
DDR1_Q08345_OID21009_v1_Neurology	7738_299_STX2_STX2	140	Weighted median	0.0265524976833424	0.0158601023679892	1.02690815614583	0.995476956950325	1.05933176433279	0.0940973162624137
DDR1_Q08345_OID21009_v1_Neurology	7738_299_STX2_STX2	140	Inverse variance weighted	0.0410490960108879	0.0142042679291359	1.04190325758347	1.0132963515162	1.07131778036969	0.00385348674790232
DDR1_Q08345_OID21009_v1_Neurology	7738_299_STX2_STX2	140	Simple mode	0.0604520637819452	0.0345642860624021	1.06231667290609	0.992732599300402	1.13677813575333	0.0825027554775831
DDR1_Q08345_OID21009_v1_Neurology	7738_299_STX2_STX2	140	Weighted mode	0.0297000503992759	0.0196004513959959	1.03014549587773	0.991321047114865	1.07049047910936	0.131973828688301
DDR1_Q08345_OID21009_v1_Neurology	7765_15_ITM2A_ITM2A	140	MR Egger	0.0273949069759841	0.0280680008368556	1.02777359759603	0.972759525655511	1.08589897097505	0.330762785489726
DDR1_Q08345_OID21009_v1_Neurology	7765_15_ITM2A_ITM2A	140	Weighted median	0.0418032571961745	0.015882347244942	1.04268931694964	1.01073102542632	1.07565809728887	0.00848694033628579
DDR1_Q08345_OID21009_v1_Neurology	7765_15_ITM2A_ITM2A	140	Inverse variance weighted	0.0591004364141898	0.0154742512159085	1.06088178655205	1.02918878446275	1.09355074795668	0.000133843934893458
DDR1_Q08345_OID21009_v1_Neurology	7765_15_ITM2A_ITM2A	140	Simple mode	0.0342896069880856	0.0364874772140128	1.03488427305063	0.963458515258116	1.11160516166138	0.348968997145758
DDR1_Q08345_OID21009_v1_Neurology	7765_15_ITM2A_ITM2A	140	Weighted mode	0.0254252322102126	0.0206379267720972	1.02575121025242	0.985087209404168	1.0680938045787	0.22004162935317
DDR1_Q08345_OID21009_v1_Neurology	7898_29_MDM1_MDM1	140	MR Egger	0.0128011946958831	0.0192744235659273	1.01288348073369	0.975332660916179	1.05188002684077	0.507699609673426
DDR1_Q08345_OID21009_v1_Neurology	7898_29_MDM1_MDM1	140	Weighted median	0.0179171752664651	0.0157063806314742	1.01807865080475	0.987215099398497	1.04990709710168	0.253970751341815
DDR1_Q08345_OID21009_v1_Neurology	7898_29_MDM1_MDM1	140	Inverse variance weighted	0.0430159858802782	0.0107056938011677	1.04395458325021	1.02227734122633	1.06609148803175	5.86823773649987e-05
DDR1_Q08345_OID21009_v1_Neurology	7898_29_MDM1_MDM1	140	Simple mode	0.0450905166437511	0.0359939241533557	1.04612254712519	0.974863736978016	1.12259010371658	0.212408954528216
DDR1_Q08345_OID21009_v1_Neurology	7898_29_MDM1_MDM1	140	Weighted mode	0.0134980181442824	0.0182444621729359	1.01358952766001	0.977984822763296	1.05049046433996	0.460643634803354
DDR1_Q08345_OID21009_v1_Neurology	7905_30_HP_HPT	140	MR Egger	0.0704379812879118	0.021828547986399	1.0729780226521	1.02803994906345	1.11988044641964	0.00156328185735152
DDR1_Q08345_OID21009_v1_Neurology	7905_30_HP_HPT	140	Weighted median	0.0511281854776003	0.0160950303504238	1.05245779444187	1.01977490950828	1.08618813696402	0.00148989678706777
DDR1_Q08345_OID21009_v1_Neurology	7905_30_HP_HPT	140	Inverse variance weighted	0.0431941900408994	0.0120581056066565	1.04414063687771	1.0197528592161	1.06911165752208	0.000340751285645271
DDR1_Q08345_OID21009_v1_Neurology	7905_30_HP_HPT	140	Simple mode	0.0503137902243584	0.0355550248101314	1.05160102673097	0.980812412491617	1.1274986993816	0.159276653175552
DDR1_Q08345_OID21009_v1_Neurology	7905_30_HP_HPT	140	Weighted mode	0.0566161914407869	0.0168072341858936	1.05825	1.02395646640418	1.0936911706897	0.000977931817540087
DDR1_Q08345_OID21009_v1_Neurology	8064_125_PVR_Poliovirus_receptor	140	MR Egger	0.0461960549316129	0.0234076822363906	1.04727971518377	1.00031704799738	1.09644717545418	0.050431318150455
DDR1_Q08345_OID21009_v1_Neurology	8064_125_PVR_Poliovirus_receptor	140	Weighted median	0.0319514712907797	0.017102314255151	1.03246739977913	0.998432165689043	1.06766285005552	0.0617266402906828
DDR1_Q08345_OID21009_v1_Neurology	8064_125_PVR_Poliovirus_receptor	140	Inverse variance weighted	0.0469878603232231	0.0128519567438403	1.04810928529447	1.02203733773894	1.07484632249423	0.000256095377224977
DDR1_Q08345_OID21009_v1_Neurology	8064_125_PVR_Poliovirus_receptor	140	Simple mode	0.0148411635766945	0.0323727423273177	1.01495184049176	0.952553113448907	1.08143810982657	0.647347810199787
DDR1_Q08345_OID21009_v1_Neurology	8064_125_PVR_Poliovirus_receptor	140	Weighted mode	0.0331894929057843	0.0189401166607351	1.03374640829357	0.996074588898473	1.07284298642899	0.0819207242496405
DDR1_Q08345_OID21009_v1_Neurology	8253_2_POMGNT1_PMGT1	140	MR Egger	0.0226249988045386	0.0229751896221892	1.02288288531151	0.97784278553588	1.06999756253231	0.326466405795608
DDR1_Q08345_OID21009_v1_Neurology	8253_2_POMGNT1_PMGT1	140	Weighted median	0.0156294541765223	0.0158908248630084	1.01575223291636	0.984603199072072	1.04788670161435	0.325335786263049
DDR1_Q08345_OID21009_v1_Neurology	8253_2_POMGNT1_PMGT1	140	Inverse variance weighted	0.0353985223952778	0.0125749376244219	1.03603250869611	1.01080965128528	1.06188475516665	0.00487763529938783
DDR1_Q08345_OID21009_v1_Neurology	8253_2_POMGNT1_PMGT1	140	Simple mode	0.0508264226987846	0.0311976632822458	1.05214024976722	0.989732081393152	1.11848360378701	0.105540439291978
DDR1_Q08345_OID21009_v1_Neurology	8253_2_POMGNT1_PMGT1	140	Weighted mode	0.0188959745353275	0.0174102842774157	1.01907563328707	0.984887179795826	1.05445087281442	0.279652469902732
DDR1_Q08345_OID21009_v1_Neurology	8363_18_KIAA1324L_K132L	140	MR Egger	0.0345758333179422	0.0264400229938707	1.03518052657369	0.982901259743939	1.09024046105765	0.193146665435113
DDR1_Q08345_OID21009_v1_Neurology	8363_18_KIAA1324L_K132L	140	Weighted median	0.0154430150295276	0.0162713773035056	1.01556287458895	0.983685659704365	1.04847309917411	0.342574416629716
DDR1_Q08345_OID21009_v1_Neurology	8363_18_KIAA1324L_K132L	140	Inverse variance weighted	0.0390894478158803	0.0144331096794238	1.03986349300862	1.01085908936754	1.0697001149474	0.00676252327913794
DDR1_Q08345_OID21009_v1_Neurology	8363_18_KIAA1324L_K132L	140	Simple mode	0.0183196808368254	0.0344832496328938	1.01848851561366	0.951926466311327	1.0897048177014	0.596084339379617
DDR1_Q08345_OID21009_v1_Neurology	8363_18_KIAA1324L_K132L	140	Weighted mode	0.00109048311956961	0.0176058934563441	1.00109107791247	0.967135114301896	1.03623923013007	0.95070075923653
DDR1_Q08345_OID21009_v1_Neurology	8815_1_OLFML1_OLFL1	140	MR Egger	0.0125459686110091	0.0222717813787907	1.01262499943545	0.969372113360564	1.05780780708331	0.574136384757004
DDR1_Q08345_OID21009_v1_Neurology	8815_1_OLFML1_OLFL1	140	Weighted median	0.0208837390562783	0.0154399545362503	1.02110333029952	0.990665269805683	1.05247659621022	0.176190562737318
DDR1_Q08345_OID21009_v1_Neurology	8815_1_OLFML1_OLFL1	140	Inverse variance weighted	0.0398566961929745	0.0123299125094319	1.04066163273258	1.01581380307823	1.0661172653491	0.00122703288239421
DDR1_Q08345_OID21009_v1_Neurology	8815_1_OLFML1_OLFL1	140	Simple mode	0.0320825650903775	0.029302610133403	1.03260275872569	0.974968076305506	1.09364448256436	0.27546689300681
DDR1_Q08345_OID21009_v1_Neurology	8815_1_OLFML1_OLFL1	140	Weighted mode	0.00994151750566541	0.0167867907782601	1.00999109855825	0.97730099608189	1.04377466436289	0.554663627575378
DDR1_Q08345_OID21009_v1_Neurology	8932_1_ENTPD6_ENTP6	140	MR Egger	0.0233695016939727	0.0286398863903022	1.02364470812963	0.967766271782095	1.08274954297821	0.415919241720731
DDR1_Q08345_OID21009_v1_Neurology	8932_1_ENTPD6_ENTP6	140	Weighted median	0.0288290293070638	0.015665272580605	1.02924860808357	0.998126851585414	1.06134074597764	0.0657220681386643
DDR1_Q08345_OID21009_v1_Neurology	8932_1_ENTPD6_ENTP6	140	Inverse variance weighted	0.0568609169061917	0.0157912407362034	1.05850857950901	1.02624866924066	1.09178257324633	0.000317253667259162
DDR1_Q08345_OID21009_v1_Neurology	8932_1_ENTPD6_ENTP6	140	Simple mode	0.037780266381211	0.0328558231244798	1.03850301378037	0.973733967196473	1.10758024877785	0.252167688805663
DDR1_Q08345_OID21009_v1_Neurology	8932_1_ENTPD6_ENTP6	140	Weighted mode	0.022239556286253	0.0174118027814947	1.0224886987293	0.988182800928904	1.05798556506586	0.203636645320994
DDR1_Q08345_OID21009_v1_Neurology	9060_27_IGSF9B_TUTLB	140	MR Egger	0.0196711776929733	0.0200135292103815	1.01986593021663	0.980634625798959	1.06066672362217	0.327379690571957
DDR1_Q08345_OID21009_v1_Neurology	9060_27_IGSF9B_TUTLB	140	Weighted median	0.0195603897183563	0.0154470588257632	1.01975294759452	0.989341364559084	1.05109935900755	0.205410814268001
DDR1_Q08345_OID21009_v1_Neurology	9060_27_IGSF9B_TUTLB	140	Inverse variance weighted	0.0370829534211549	0.0109971164987806	1.03777910459477	1.01564980039018	1.06039056919006	0.00074607780049445
DDR1_Q08345_OID21009_v1_Neurology	9060_27_IGSF9B_TUTLB	140	Simple mode	0.0187464232838702	0.0290787965211462	1.01892324064632	0.962474200458804	1.07868301283743	0.520199232532467
DDR1_Q08345_OID21009_v1_Neurology	9060_27_IGSF9B_TUTLB	140	Weighted mode	0.00899024276343341	0.0181214612715839	1.00903077637385	0.973820950465726	1.04551366160554	0.620600189719278
DDR1_Q08345_OID21009_v1_Neurology	9092_33_ANGPTL1_ANGL1	140	MR Egger	0.0344914000053068	0.0262814502737337	1.03509312654244	0.983123783519613	1.08980964409151	0.191568632868854
DDR1_Q08345_OID21009_v1_Neurology	9092_33_ANGPTL1_ANGL1	140	Weighted median	0.0576114703331422	0.0159529540500583	1.05930334497048	1.02669374235674	1.09294868603158	0.000304624203406717
DDR1_Q08345_OID21009_v1_Neurology	9092_33_ANGPTL1_ANGL1	140	Inverse variance weighted	0.0738120309439465	0.0145475872970206	1.07660441815931	1.04634041771418	1.10774376443591	3.89880910733975e-07
DDR1_Q08345_OID21009_v1_Neurology	9092_33_ANGPTL1_ANGL1	140	Simple mode	0.0755441585741266	0.0302808629717584	1.07847085040156	1.01632549520928	1.14441621375085	0.0137743351989816
DDR1_Q08345_OID21009_v1_Neurology	9092_33_ANGPTL1_ANGL1	140	Weighted mode	0.0577281015160644	0.0168560221752184	1.05942689997772	1.02499762760157	1.09501263824651	0.000809092274264488
DDR1_Q08345_OID21009_v1_Neurology	9294_45_MFAP2_MFAP2	140	MR Egger	0.0451227608037301	0.0208693725349424	1.04615627901178	1.00422770226014	1.08983546027717	0.032330574600935
DDR1_Q08345_OID21009_v1_Neurology	9294_45_MFAP2_MFAP2	140	Weighted median	0.00959098267635373	0.0154803081206337	1.00963712354482	0.979463387324414	1.04074040380871	0.53554738168011
DDR1_Q08345_OID21009_v1_Neurology	9294_45_MFAP2_MFAP2	140	Inverse variance weighted	0.0332411552659271	0.011454770055628	1.03379981545237	1.01084822583719	1.05727252728195	0.00370849244410357
DDR1_Q08345_OID21009_v1_Neurology	9294_45_MFAP2_MFAP2	140	Simple mode	0.0773807212530739	0.0322632295184348	1.08045334965056	1.01424530230157	1.15098333521689	0.0177932025188615
DDR1_Q08345_OID21009_v1_Neurology	9294_45_MFAP2_MFAP2	140	Weighted mode	0.0174248753633768	0.0171744346177759	1.01757757413374	0.983894093295054	1.05241420437046	0.312067818530856
DDR1_Q08345_OID21009_v1_Neurology	9783_75_DNAJC11_DJC11	140	MR Egger	8.92928294819226e-06	0.0236017170442738	1.00000892932281	0.954802815130391	1.04735537314979	0.999698681166042
DDR1_Q08345_OID21009_v1_Neurology	9783_75_DNAJC11_DJC11	140	Weighted median	0.0114385119967298	0.0155976726201342	1.01150418192498	0.981048946330589	1.0429048559489	0.463346597949263
DDR1_Q08345_OID21009_v1_Neurology	9783_75_DNAJC11_DJC11	140	Inverse variance weighted	0.0278703184216964	0.0130069816229283	1.02826	1.00237946087508	1.05481352990684	0.0321355961052252
DDR1_Q08345_OID21009_v1_Neurology	9783_75_DNAJC11_DJC11	140	Simple mode	0.0198797506641398	0.0342992812892404	1.02007866886888	0.95375653866603	1.09101269401172	0.563124829305602
DDR1_Q08345_OID21009_v1_Neurology	9783_75_DNAJC11_DJC11	140	Weighted mode	0.00173196689924382	0.0180658915615372	1.00173346762019	0.966883583077814	1.03783946455693	0.923762345041544
DDR1_Q08345_OID21009_v1_Neurology	9959_60_TMEM59L_TM59L	140	MR Egger	0.0207183527633538	0.0243145026979762	1.02093446776918	0.973421521195064	1.07076653308375	0.39563573002899
DDR1_Q08345_OID21009_v1_Neurology	9959_60_TMEM59L_TM59L	140	Weighted median	0.0320101849406178	0.0160076338274394	1.03252802148815	1.00063542443546	1.06543711038385	0.0455345610080731
DDR1_Q08345_OID21009_v1_Neurology	9959_60_TMEM59L_TM59L	140	Inverse variance weighted	0.0552403594365579	0.0134996434109638	1.05679459470436	1.02919923522813	1.0851298535495	4.27693440621578e-05
DDR1_Q08345_OID21009_v1_Neurology	9959_60_TMEM59L_TM59L	140	Simple mode	0.0607134001658374	0.0348739868009005	1.06259433118346	0.992389493715853	1.13776568556309	0.0839073944017471
DDR1_Q08345_OID21009_v1_Neurology	9959_60_TMEM59L_TM59L	140	Weighted mode	0.0397714192423628	0.0179945420611964	1.04057289206574	1.00451226655635	1.0779280450343	0.0287271881352203
DPP6_P42658_OID21354_v1_Oncology	10916_44_PLA2R1_PLA2R	46	MR Egger	0.0231814095471951	0.0362975826659504	1.02345218670539	0.953170147463077	1.09891647494407	0.526361972259588
DPP6_P42658_OID21354_v1_Oncology	10916_44_PLA2R1_PLA2R	46	Weighted median	0.0511635515793507	0.0229535185261464	1.05249501642951	1.00619375774878	1.10092688518301	0.0258134445150804
DPP6_P42658_OID21354_v1_Oncology	10916_44_PLA2R1_PLA2R	46	Inverse variance weighted	0.0973803940030628	0.0193140310117531	1.10227959442883	1.06133218062619	1.14480680645839	4.60809794902239e-07
DPP6_P42658_OID21354_v1_Oncology	10916_44_PLA2R1_PLA2R	46	Simple mode	0.056533643642239	0.0464800026233563	1.05816221463235	0.966023457923713	1.15908911247584	0.230212123683252
DPP6_P42658_OID21354_v1_Oncology	10916_44_PLA2R1_PLA2R	46	Weighted mode	0.0438654920310373	0.0220237572898922	1.04484180588698	1.00069917204976	1.09093	0.0524898882860958
DPP6_P42658_OID21354_v1_Oncology	15666_21_BMP2_BMP_2	46	MR Egger	0.0444572614504818	0.037329315186232	1.04546029429907	0.971699968732843	1.12481965846025	0.240059389277568
DPP6_P42658_OID21354_v1_Oncology	15666_21_BMP2_BMP_2	46	Weighted median	0.0358266559003846	0.0260174395665415	1.03647616389051	0.984946921907756	1.09070124939565	0.168504623451842
DPP6_P42658_OID21354_v1_Oncology	15666_21_BMP2_BMP_2	46	Inverse variance weighted	0.0427077380720457	0.018785385515958	1.0436328361295	1.00590575306295	1.08277489549216	0.0229987447035472
DPP6_P42658_OID21354_v1_Oncology	15666_21_BMP2_BMP_2	46	Simple mode	0.0560355485797076	0.0524581401165711	1.05763528050042	0.954295023825317	1.17216621551195	0.29112933178482
DPP6_P42658_OID21354_v1_Oncology	15666_21_BMP2_BMP_2	46	Weighted mode	0.0359218131463783	0.0264520867502448	1.03657479680055	0.98420184406396	1.09173470446401	0.18123549229711
DPP6_P42658_OID21354_v1_Oncology	16773_29_SCUBE3_SCUB3	46	MR Egger	0.0545164323825629	0.0446445019858959	1.0560298293573	0.967551339397022	1.15259930412314	0.228542510042451
DPP6_P42658_OID21354_v1_Oncology	16773_29_SCUBE3_SCUB3	46	Weighted median	0.0345757604236891	0.0274689571507794	1.03518045111498	0.980920957956757	1.09244129986042	0.208131028687436
DPP6_P42658_OID21354_v1_Oncology	16773_29_SCUBE3_SCUB3	46	Inverse variance weighted	0.0742835146225884	0.0225690703150591	1.07711213925253	1.03050413793643	1.12582814354184	0.000996951315919368
DPP6_P42658_OID21354_v1_Oncology	16773_29_SCUBE3_SCUB3	46	Simple mode	0.0368892356180448	0.0616096214427493	1.03757808777741	0.919554815353337	1.17074944338381	0.552336815400389
DPP6_P42658_OID21354_v1_Oncology	16773_29_SCUBE3_SCUB3	46	Weighted mode	0.0313732253873839	0.0275624321987529	1.03187055231375	0.977605424563609	1.08914784020104	0.261035683970886
DPP6_P42658_OID21354_v1_Oncology	16900_29_MDGA1_MDGA1	46	MR Egger	-0.0468104	0.0637258875139614	0.954268278686665	0.842220710976722	1.08122245848307	0.466504965247206
DPP6_P42658_OID21354_v1_Oncology	16900_29_MDGA1_MDGA1	46	Weighted median	0.0300606832291239	0.0264878733105997	1.03051706715944	0.978381553566587	1.08543075228229	0.256423614315416
DPP6_P42658_OID21354_v1_Oncology	16900_29_MDGA1_MDGA1	46	Inverse variance weighted	0.0742858541527864	0.0338348793089582	1.07711465919185	1.0080013316274	1.15096672260631	0.0281248356489211
DPP6_P42658_OID21354_v1_Oncology	16900_29_MDGA1_MDGA1	46	Simple mode	-0.00744033	0.0407114120713859	0.992587282335955	0.916461980386619	1.07503588161884	0.855808955061748
DPP6_P42658_OID21354_v1_Oncology	16900_29_MDGA1_MDGA1	46	Weighted mode	0.0225869684858984	0.0244279714916879	1.02284398548914	0.975025303866164	1.07300786400402	0.360087559898657
DPP6_P42658_OID21354_v1_Oncology	3327_27_NTN4_NET4	46	MR Egger	-0.0246583	0.0484919085087017	0.975643224592291	0.88718438035801	1.07292206982806	0.613640528576692
DPP6_P42658_OID21354_v1_Oncology	3327_27_NTN4_NET4	46	Weighted median	0.0709764584277375	0.0274559292690636	1.07355595237584	1.0173109647655	1.13291060727657	0.00973493626189146
DPP6_P42658_OID21354_v1_Oncology	3327_27_NTN4_NET4	46	Inverse variance weighted	0.0929568490199981	0.0265459733609338	1.09741437974042	1.04177578354004	1.15602449191962	0.000462246642288876
DPP6_P42658_OID21354_v1_Oncology	3327_27_NTN4_NET4	46	Simple mode	0.0694753511538915	0.0407931639137243	1.07194563865605	0.989575465929996	1.16117213067104	0.0954453356357288
DPP6_P42658_OID21354_v1_Oncology	3327_27_NTN4_NET4	46	Weighted mode	0.065900629702865	0.0266071442108418	1.06812057243361	1.01384560174299	1.12530108657029	0.0170808788210404
DPP6_P42658_OID21354_v1_Oncology	4430_44_COLEC11_Collectin_Kidney_1	46	MR Egger	0.040662371658555	0.0552761726819256	1.04150040612224	0.934560487739626	1.1606772490204	0.46586419635257
DPP6_P42658_OID21354_v1_Oncology	4430_44_COLEC11_Collectin_Kidney_1	46	Weighted median	0.0603969366511483	0.0328007495396967	1.06225811205008	0.996115033637507	1.13279315993822	0.065573515363477
DPP6_P42658_OID21354_v1_Oncology	4430_44_COLEC11_Collectin_Kidney_1	46	Inverse variance weighted	0.0886029488896938	0.0283198604909055	1.09264673358853	1.03364978793466	1.15501100890968	0.00175610984695727
DPP6_P42658_OID21354_v1_Oncology	4430_44_COLEC11_Collectin_Kidney_1	46	Simple mode	0.0776798005415092	0.0549106985781319	1.08077653919681	0.970498745825061	1.20358520060239	0.164051670833678
DPP6_P42658_OID21354_v1_Oncology	4430_44_COLEC11_Collectin_Kidney_1	46	Weighted mode	0.0608602795515373	0.0341308817386297	1.0627504158486	0.993981932891567	1.13627663543215	0.0813087109047369
DPP6_P42658_OID21354_v1_Oncology	5491_12_SPOCK2_Testican_2	46	MR Egger	-0.0188048	0.0463388791445336	0.981370901131495	0.896166543126528	1.07467618934717	0.686848570605561
DPP6_P42658_OID21354_v1_Oncology	5491_12_SPOCK2_Testican_2	46	Weighted median	0.0855900440090934	0.0292576098807223	1.08935964723796	1.02864780455956	1.15365476479923	0.00344020066909678
DPP6_P42658_OID21354_v1_Oncology	5491_12_SPOCK2_Testican_2	46	Inverse variance weighted	0.0955036504802678	0.0258126604721206	1.10021283833186	1.04593459599141	1.1573078223719	0.000215704589564948
DPP6_P42658_OID21354_v1_Oncology	5491_12_SPOCK2_Testican_2	46	Simple mode	0.0903984270041753	0.0553664001370974	1.09461031914549	0.982043457764168	1.22008017191794	0.109504476094178
DPP6_P42658_OID21354_v1_Oncology	5491_12_SPOCK2_Testican_2	46	Weighted mode	0.0442191915251486	0.0295861305883753	1.04521143126945	0.986324743218143	1.10761383972977	0.142000916658458
DPP6_P42658_OID21354_v1_Oncology	5660_51_SOD3_SOD3	46	MR Egger	0.0467004570223914	0.04901570915588	1.04780809850936	0.951828570963474	1.15346591265953	0.345914053229996
DPP6_P42658_OID21354_v1_Oncology	5660_51_SOD3_SOD3	46	Weighted median	0.0833422263679294	0.0328133348034228	1.08691371543952	1.01921027798818	1.15911451279954	0.0110887672380591
DPP6_P42658_OID21354_v1_Oncology	5660_51_SOD3_SOD3	46	Inverse variance weighted	0.135691275826293	0.0258899379038631	1.14532824849114	1.08865936353909	1.20494696571328	1.59638141858114e-07
DPP6_P42658_OID21354_v1_Oncology	5660_51_SOD3_SOD3	46	Simple mode	0.0855901940819046	0.0706983139919207	1.08935981072123	0.948400401598763	1.25126981727772	0.232353841110981
DPP6_P42658_OID21354_v1_Oncology	5660_51_SOD3_SOD3	46	Weighted mode	0.0612073308788965	0.0305983738762098	1.06311930879977	1.00123528041264	1.12882824532221	0.0515189905255544
DPP6_P42658_OID21354_v1_Oncology	6626_81_CHST12_CHSTC	46	MR Egger	0.103921169397704	0.0640223831620841	1.10951	0.978668111488854	1.25785141647872	0.111690538374783
DPP6_P42658_OID21354_v1_Oncology	6626_81_CHST12_CHSTC	46	Weighted median	0.0666923508563593	0.0298650907077297	1.06896656093459	1.00819013017643	1.13340675949323	0.0255409890071186
DPP6_P42658_OID21354_v1_Oncology	6626_81_CHST12_CHSTC	46	Inverse variance weighted	0.0759416246426919	0.0322254277335782	1.07889959116984	1.01286179673994	1.14924299798161	0.0184443622641995
DPP6_P42658_OID21354_v1_Oncology	6626_81_CHST12_CHSTC	46	Simple mode	0.123253603745566	0.0541402244367491	1.13117125384185	1.01728647511893	1.25780538404245	0.0276191682419248
DPP6_P42658_OID21354_v1_Oncology	6626_81_CHST12_CHSTC	46	Weighted mode	0.0828986596433374	0.0310626650100824	1.08643170359296	1.02225997307974	1.15463177435769	0.0105494527884878
DPP6_P42658_OID21354_v1_Oncology	9177_6_FAM3B_FAM3B	46	MR Egger	-0.0350443	0.0707458786447595	0.965562676076654	0.840543825179325	1.10917628980667	0.62281512127978
DPP6_P42658_OID21354_v1_Oncology	9177_6_FAM3B_FAM3B	46	Weighted median	0.0418769646719229	0.0289173269963624	1.0427661737796	0.985308000089871	1.10357501723296	0.147571840432696
DPP6_P42658_OID21354_v1_Oncology	9177_6_FAM3B_FAM3B	46	Inverse variance weighted	0.0736359713786094	0.0368024494167103	1.07641488833817	1.00150430084895	1.15692864309609	0.0454091709972885
DPP6_P42658_OID21354_v1_Oncology	9177_6_FAM3B_FAM3B	46	Simple mode	0.0768308332690635	0.0554303029041893	1.07985938465838	0.968688135557743	1.20378917407032	0.172552871702239
DPP6_P42658_OID21354_v1_Oncology	9177_6_FAM3B_FAM3B	46	Weighted mode	0.0453066176781312	0.0282996004578622	1.04634863971825	0.989890845285874	1.1060264685285	0.116382934985974
DPP6_P42658_OID21354_v1_Oncology	9294_45_MFAP2_MFAP2	46	MR Egger	0.0203752416097309	0.0407068481187619	1.02058423385419	0.942320168325285	1.10534849343498	0.619192315387407
DPP6_P42658_OID21354_v1_Oncology	9294_45_MFAP2_MFAP2	46	Weighted median	0.0153138293237578	0.0279178868317726	1.01543168685621	0.961361058950714	1.07254345396209	0.583327277064023
DPP6_P42658_OID21354_v1_Oncology	9294_45_MFAP2_MFAP2	46	Inverse variance weighted	0.0801445251549052	0.0212502312409725	1.08344364122036	1.03924456761749	1.12952250151466	0.000162291257115231
DPP6_P42658_OID21354_v1_Oncology	9294_45_MFAP2_MFAP2	46	Simple mode	0.129373293180462	0.0699341655889896	1.13811489540773	0.992331879824579	1.30531482610226	0.0708968150576043
DPP6_P42658_OID21354_v1_Oncology	9294_45_MFAP2_MFAP2	46	Weighted mode	0.030354285059261	0.0276586987439864	1.03081967327703	0.976425558565657	1.08824394188931	0.278278758761276
DPP6_P42658_OID21354_v1_Oncology	9369_174_LRRC4C_NGL1	46	MR Egger	0.0323865008590839	0.0395029282614374	1.03291665133811	0.95595997062999	1.11606849804435	0.416720441544104
DPP6_P42658_OID21354_v1_Oncology	9369_174_LRRC4C_NGL1	46	Weighted median	0.0583360138593754	0.0257528934730578	1.06007113446626	1.00789131624666	1.11495236838967	0.0234990764201297
DPP6_P42658_OID21354_v1_Oncology	9369_174_LRRC4C_NGL1	46	Inverse variance weighted	0.0780684010135587	0.020317468321668	1.0811966110849	1.03898696165626	1.12512106018922	0.000121823356788398
DPP6_P42658_OID21354_v1_Oncology	9369_174_LRRC4C_NGL1	46	Simple mode	0.059277017595957	0.0493809667544491	1.06106913485224	0.963185096699714	1.16890067422533	0.236264421982587
DPP6_P42658_OID21354_v1_Oncology	9369_174_LRRC4C_NGL1	46	Weighted mode	0.0540091112955534	0.0262120561123609	1.05549421903105	1.00263695197321	1.11113802879044	0.045163105044134
DPP6_P42658_OID21354_v1_Oncology	9931_20_KRT1_Keratin_1	46	MR Egger	0.0174621655617274	0.0358621556221779	1.01761552051083	0.948543470892768	1.09171733226931	0.628728718456016
DPP6_P42658_OID21354_v1_Oncology	9931_20_KRT1_Keratin_1	46	Weighted median	0.0300414949554942	0.027197470956387	1.03049729350569	0.977003008012093	1.08692057569326	0.269346204008012
DPP6_P42658_OID21354_v1_Oncology	9931_20_KRT1_Keratin_1	46	Inverse variance weighted	0.0500144489207251	0.0183196119920404	1.05128628621849	1.01420799703661	1.08972011542045	0.00633143174738644
DPP6_P42658_OID21354_v1_Oncology	9931_20_KRT1_Keratin_1	46	Simple mode	0.0418153612453179	0.0503453950460871	1.04270193778875	0.944724797908836	1.15084025895691	0.410601832733697
DPP6_P42658_OID21354_v1_Oncology	9931_20_KRT1_Keratin_1	46	Weighted mode	0.0245825602490277	0.0290374774839094	1.02488720255705	0.968186160509764	1.08490889542582	0.40170878418628
ENTPD6_O75354_OID20100_v1_Cardiometabolic	10816_150_PILRA_PILRA_isoform_FDF03_M14	111	MR Egger	0.0222841493889762	0.00840050543325646	1.02253429568952	1.00583612293383	1.03950967958032	0.00917709721581665
ENTPD6_O75354_OID20100_v1_Cardiometabolic	10816_150_PILRA_PILRA_isoform_FDF03_M14	111	Weighted median	0.0125748513037729	0.00873694791886631	1.01265424719457	0.995460766983922	1.03014469115463	0.150073252370549
ENTPD6_O75354_OID20100_v1_Cardiometabolic	10816_150_PILRA_PILRA_isoform_FDF03_M14	111	Inverse variance weighted	0.0135448112603591	0.00541111029632452	1.01363695778213	1.00294335827747	1.02444457476287	0.0123093971341802
ENTPD6_O75354_OID20100_v1_Cardiometabolic	10816_150_PILRA_PILRA_isoform_FDF03_M14	111	Simple mode	0.0216957611788049	0.0157127695170691	1.02193282553177	0.990940024094263	1.05389496287012	0.170147943676755
ENTPD6_O75354_OID20100_v1_Cardiometabolic	10816_150_PILRA_PILRA_isoform_FDF03_M14	111	Weighted mode	0.0164521613838889	0.00846966985373358	1.01658824344807	0.99985161948005	1.03360502356765	0.054635430595762
ENTPD6_O75354_OID20100_v1_Cardiometabolic	12560_9_NT5C_NT5C	111	MR Egger	0.0143368959053059	0.011824584449802	1.01444016211285	0.991199662051308	1.03822557846502	0.227955813936957
ENTPD6_O75354_OID20100_v1_Cardiometabolic	12560_9_NT5C_NT5C	111	Weighted median	0.0188788481362729	0.0113430366175256	1.01905818034056	0.996652113078925	1.04196796584404	0.0960413588497988
ENTPD6_O75354_OID20100_v1_Cardiometabolic	12560_9_NT5C_NT5C	111	Inverse variance weighted	0.0160637231117704	0.00753648871834677	1.01619	1.00129304048072	1.03131557136545	0.0330512767690287
ENTPD6_O75354_OID20100_v1_Cardiometabolic	12560_9_NT5C_NT5C	111	Simple mode	0.0157753809290936	0.0195837794821082	1.01590046915668	0.977644837390084	1.05565305902696	0.422250037672394
ENTPD6_O75354_OID20100_v1_Cardiometabolic	12560_9_NT5C_NT5C	111	Weighted mode	0.0182038518215799	0.011181068112104	1.0183705519238	0.996295835726949	1.04093437294043	0.106365469574433
ENTPD6_O75354_OID20100_v1_Cardiometabolic	14254_27_PTPN4_PTN4	111	MR Egger	0.0247565618512205	0.0142280314263661	1.02506555008829	0.996874514785637	1.05405381158104	0.0846841323741224
ENTPD6_O75354_OID20100_v1_Cardiometabolic	14254_27_PTPN4_PTN4	111	Weighted median	0.0236848248553606	0.0125759358525909	1.02396753791031	0.999036455092084	1.04952077909656	0.0596536400754484
ENTPD6_O75354_OID20100_v1_Cardiometabolic	14254_27_PTPN4_PTN4	111	Inverse variance weighted	0.0211590153882141	0.00905311638060801	1.02138445457046	1.00342074472097	1.03966975919787	0.0194283750877113
ENTPD6_O75354_OID20100_v1_Cardiometabolic	14254_27_PTPN4_PTN4	111	Simple mode	0.0400186956476978	0.0256567077755988	1.04083023300584	0.989784088966069	1.09450898030765	0.121685531796197
ENTPD6_O75354_OID20100_v1_Cardiometabolic	14254_27_PTPN4_PTN4	111	Weighted mode	0.023576788265037	0.014162747661209	1.02385691792453	0.995826536056665	1.05267629494286	0.0988177146185365
ENTPD6_O75354_OID20100_v1_Cardiometabolic	15447_45_SORD_Sorbitol_dehydrogenase	111	MR Egger	0.0115023652713454	0.0124937865710426	1.0115687718414	0.98709849087371	1.03664567378579	0.359267935392347
ENTPD6_O75354_OID20100_v1_Cardiometabolic	15447_45_SORD_Sorbitol_dehydrogenase	111	Weighted median	0.019757554665014	0.0119850936872464	1.01995402695228	0.996273730873672	1.04419717679788	0.0992479257041619
ENTPD6_O75354_OID20100_v1_Cardiometabolic	15447_45_SORD_Sorbitol_dehydrogenase	111	Inverse variance weighted	0.0192930062603765	0.00797435497414961	1.01948031897492	1.00366998848721	1.03553970199284	0.0155469287524894
ENTPD6_O75354_OID20100_v1_Cardiometabolic	15447_45_SORD_Sorbitol_dehydrogenase	111	Simple mode	0.0245186446350165	0.020057924594493	1.0248216983556	0.985314019030422	1.06591349877873	0.224172236051229
ENTPD6_O75354_OID20100_v1_Cardiometabolic	15447_45_SORD_Sorbitol_dehydrogenase	111	Weighted mode	0.0137574087811282	0.0112477871672134	1.01385247739497	0.99174599881361	1.03645171964349	0.223897734152977
ENTPD6_O75354_OID20100_v1_Cardiometabolic	17857_6_ACADL_ACADL	111	MR Egger	0.0178527411413006	0.0119959182512751	1.0180130539109	0.994356724807244	1.04223218094481	0.13957647121292
ENTPD6_O75354_OID20100_v1_Cardiometabolic	17857_6_ACADL_ACADL	111	Weighted median	0.0215325616198633	0.0110019800360751	1.02176606015376	0.999968681239599	1.04403857967626	0.0503294465629554
ENTPD6_O75354_OID20100_v1_Cardiometabolic	17857_6_ACADL_ACADL	111	Inverse variance weighted	0.0168592581619072	0.00762293719657556	1.01700217749644	1.00192014237356	1.03231124446929	0.0269909565540824
ENTPD6_O75354_OID20100_v1_Cardiometabolic	17857_6_ACADL_ACADL	111	Simple mode	0.041501687595672	0.0196447760821215	1.04237492095739	1.00300242475033	1.0832929702153	0.0368968369007696
ENTPD6_O75354_OID20100_v1_Cardiometabolic	17857_6_ACADL_ACADL	111	Weighted mode	0.0219103077345395	0.0101798251073178	1.02215210122126	1.00195976836495	1.0427513668897	0.0335574535763391
ENTPD6_O75354_OID20100_v1_Cardiometabolic	3327_27_NTN4_NET4	111	MR Egger	-0.0126229	0.0125511767753441	0.98745646858483	0.963461093714954	1.01204945763851	0.316781672614189
ENTPD6_O75354_OID20100_v1_Cardiometabolic	3327_27_NTN4_NET4	111	Weighted median	-0.0238622	0.0119467833336133	0.976420244109127	0.953822291065935	0.999553587745018	0.0457844533375692
ENTPD6_O75354_OID20100_v1_Cardiometabolic	3327_27_NTN4_NET4	111	Inverse variance weighted	-0.0224016	0.00801114136536142	0.977847437430908	0.962613350848619	0.993322614990994	0.00516901761204662
ENTPD6_O75354_OID20100_v1_Cardiometabolic	3327_27_NTN4_NET4	111	Simple mode	-0.00156901	0.0205618789910355	0.998432218047018	0.95899415881318	1.03949214379781	0.939313590342822
ENTPD6_O75354_OID20100_v1_Cardiometabolic	3327_27_NTN4_NET4	111	Weighted mode	-0.0244357	0.0116828	0.975860461806124	0.953768895370027	0.998463721703782	0.0387761758534643
ENTPD6_O75354_OID20100_v1_Cardiometabolic	4931_59_F3_TF	111	MR Egger	0.0253070671958324	0.0120299999501021	1.0256300095069	1.00172976160829	1.05010049288369	0.0377082091261605
ENTPD6_O75354_OID20100_v1_Cardiometabolic	4931_59_F3_TF	111	Weighted median	0.0239531211893983	0.0117293463958423	1.02424230150429	1.00096406666736	1.0480618906567	0.0411363463073604
ENTPD6_O75354_OID20100_v1_Cardiometabolic	4931_59_F3_TF	111	Inverse variance weighted	0.0182281047606453	0.0076715573280768	1.01839525070225	1.00319695178253	1.03382380180689	0.0174984672105143
ENTPD6_O75354_OID20100_v1_Cardiometabolic	4931_59_F3_TF	111	Simple mode	-0.00300313	0.0191240422558034	0.997001371561869	0.960322362943684	1.03508131566289	0.875505574814931
ENTPD6_O75354_OID20100_v1_Cardiometabolic	4931_59_F3_TF	111	Weighted mode	0.0225060761877122	0.0104004810669077	1.0227612486349	1.00212338449122	1.04382413173633	0.0326315149441177
ENTPD6_O75354_OID20100_v1_Cardiometabolic	5337_64_CD86_B7_2	111	MR Egger	-0.0182764	0.0113637446377525	0.981889601323945	0.960261785260476	1.00400453708212	0.110660543961969
ENTPD6_O75354_OID20100_v1_Cardiometabolic	5337_64_CD86_B7_2	111	Weighted median	-0.0218336	0.0108892080294786	0.978403063180956	0.957742418342996	0.999509404311515	0.0449561583696496
ENTPD6_O75354_OID20100_v1_Cardiometabolic	5337_64_CD86_B7_2	111	Inverse variance weighted	-0.0208451	0.00727891832325327	0.979370694608633	0.965497523745132	0.993443208158236	0.00418647474533258
ENTPD6_O75354_OID20100_v1_Cardiometabolic	5337_64_CD86_B7_2	111	Simple mode	-0.0207414	0.0207743794822224	0.979472197760928	0.940391303613432	1.02017722037654	0.320270017048423
ENTPD6_O75354_OID20100_v1_Cardiometabolic	5337_64_CD86_B7_2	111	Weighted mode	-0.0185506	0.0113081491997519	0.981620389981385	0.96010311767591	1.00361989487099	0.103765239222844
ENTPD6_O75354_OID20100_v1_Cardiometabolic	5618_50_FAM3B_FAM3B	111	MR Egger	0.0017611182700242	0.0173680984327842	1.00176266994957	0.968235094805522	1.0364512217005	0.919419543484485
ENTPD6_O75354_OID20100_v1_Cardiometabolic	5618_50_FAM3B_FAM3B	111	Weighted median	0.0127712153015417	0.0120842123574625	1.01285311555556	0.989145498971152	1.03712895095581	0.290579466384153
ENTPD6_O75354_OID20100_v1_Cardiometabolic	5618_50_FAM3B_FAM3B	111	Inverse variance weighted	0.0237070319804128	0.0112464461650593	1.02399027753797	1.00166538270895	1.04681274464783	0.0350346547370137
ENTPD6_O75354_OID20100_v1_Cardiometabolic	5618_50_FAM3B_FAM3B	111	Simple mode	0.0283139269400094	0.019856404990217	1.02871857621132	0.98945140397752	1.06954409765665	0.15671909949161
ENTPD6_O75354_OID20100_v1_Cardiometabolic	5618_50_FAM3B_FAM3B	111	Weighted mode	0.0103666002709629	0.0121371551791818	1.01042051963063	0.986667452499528	1.03474541893954	0.394894162091666
ENTPD6_O75354_OID20100_v1_Cardiometabolic	6402_8_PILRA_PILRA_isoform_FDF03_deltaTM	111	MR Egger	0.0188500692048523	0.00835086983895637	1.01902885335707	1.00248544793783	1.03584526449767	0.0259851158549474
ENTPD6_O75354_OID20100_v1_Cardiometabolic	6402_8_PILRA_PILRA_isoform_FDF03_deltaTM	111	Weighted median	0.0146455926989443	0.00806548726760168	1.01475336487809	0.998837913400645	1.03092241265213	0.0693957127276695
ENTPD6_O75354_OID20100_v1_Cardiometabolic	6402_8_PILRA_PILRA_isoform_FDF03_deltaTM	111	Inverse variance weighted	0.0157940711536903	0.00535231517511126	1.01591945674206	1.00531762203928	1.02663309581053	0.00316863989940908
ENTPD6_O75354_OID20100_v1_Cardiometabolic	6402_8_PILRA_PILRA_isoform_FDF03_deltaTM	111	Simple mode	0.0298555223828236	0.0139701658955385	1.03030566709207	1.00247706008402	1.05890679189513	0.0348060052380983
ENTPD6_O75354_OID20100_v1_Cardiometabolic	6402_8_PILRA_PILRA_isoform_FDF03_deltaTM	111	Weighted mode	0.0177049795866894	0.00744163604696459	1.01786264183227	1.00312424324118	1.03281758428072	0.0190738491494329
ENTPD6_O75354_OID20100_v1_Cardiometabolic	8363_18_KIAA1324L_K132L	111	MR Egger	-0.0146361	0.011700810710966	0.985470463144201	0.963127272625221	1.00833198408197	0.213662381999607
ENTPD6_O75354_OID20100_v1_Cardiometabolic	8363_18_KIAA1324L_K132L	111	Weighted median	-0.0214291	0.0106166944941787	0.978798856871388	0.958641753447294	0.999379798311078	0.0435459033201248
ENTPD6_O75354_OID20100_v1_Cardiometabolic	8363_18_KIAA1324L_K132L	111	Inverse variance weighted	-0.0160808	0.00743938373870136	0.984047772711267	0.96980328624849	0.998501482423196	0.0306504555095982
ENTPD6_O75354_OID20100_v1_Cardiometabolic	8363_18_KIAA1324L_K132L	111	Simple mode	-0.00719978	0.0188937976961506	0.992826072105246	0.95673232606414	1.03028149316014	0.703889250716908
ENTPD6_O75354_OID20100_v1_Cardiometabolic	8363_18_KIAA1324L_K132L	111	Weighted mode	-0.0215021	0.0103842125293511	0.978727420978507	0.959008675493726	0.998851615270404	0.0407318075512717
ENTPD6_O75354_OID20100_v1_Cardiometabolic	8932_1_ENTPD6_ENTP6	111	MR Egger	0.168701924590962	0.0170908721994562	1.1837672344279	1.14477008198159	1.22409284393546	8.41649210593123e-17
ENTPD6_O75354_OID20100_v1_Cardiometabolic	8932_1_ENTPD6_ENTP6	111	Weighted median	0.157266901445108	0.01348279525462	1.17030792909787	1.13978611085487	1.2016470773469	1.94071025984549e-31
ENTPD6_O75354_OID20100_v1_Cardiometabolic	8932_1_ENTPD6_ENTP6	111	Inverse variance weighted	0.158145325470056	0.0109133090735568	1.17133640735325	1.14654748485159	1.19666127859397	1.38013455195455e-47
ENTPD6_O75354_OID20100_v1_Cardiometabolic	8932_1_ENTPD6_ENTP6	111	Simple mode	0.154930007309519	0.0297072915594831	1.16757623644296	1.10153395821827	1.2375780680528	8.70066050378645e-07
ENTPD6_O75354_OID20100_v1_Cardiometabolic	8932_1_ENTPD6_ENTP6	111	Weighted mode	0.157713529905331	0.0141168473657619	1.17083073866835	1.13887907264313	1.2036788202888	7.96042304760883e-20
ENTPD6_O75354_OID20100_v1_Cardiometabolic	9369_174_LRRC4C_NGL1	111	MR Egger	-0.0165795	0.0124512369585717	0.983557171781682	0.959844548441272	1.0078556071753	0.185784301431315
ENTPD6_O75354_OID20100_v1_Cardiometabolic	9369_174_LRRC4C_NGL1	111	Weighted median	-0.029985	0.0122844660726165	0.970460057389115	0.947372810991248	0.994109934400877	0.0146511049377235
ENTPD6_O75354_OID20100_v1_Cardiometabolic	9369_174_LRRC4C_NGL1	111	Inverse variance weighted	-0.0186888	0.00790797130608162	0.981484732271561	0.966389376567929	0.996815882955295	0.0181135424353804
ENTPD6_O75354_OID20100_v1_Cardiometabolic	9369_174_LRRC4C_NGL1	111	Simple mode	-0.00070887	0.0226246299926922	0.999291381127721	0.955946676843238	1.0446014287049	0.975061720166269
ENTPD6_O75354_OID20100_v1_Cardiometabolic	9369_174_LRRC4C_NGL1	111	Weighted mode	-0.0253839	0.0133373603413678	0.974935586705676	0.949779808904715	1.00075763804798	0.0596262300223769
ERBB4_Q15303_OID21510_v1_Oncology	10916_44_PLA2R1_PLA2R	82	MR Egger	-0.00413845	0.0443279488028589	0.995870103140445	0.91299832948278	1.08626404923522	0.925851142970647
ERBB4_Q15303_OID21510_v1_Oncology	10916_44_PLA2R1_PLA2R	82	Weighted median	0.0314637063470746	0.0218898745821416	1.03196392117558	0.988624745239905	1.07720299308274	0.150614739503225
ERBB4_Q15303_OID21510_v1_Oncology	10916_44_PLA2R1_PLA2R	82	Inverse variance weighted	0.0584890118417857	0.0190467149030162	1.06023333561896	1.02138285635391	1.10056157587219	0.00213472596767341
ERBB4_Q15303_OID21510_v1_Oncology	10916_44_PLA2R1_PLA2R	82	Simple mode	0.0840033951972237	0.0521399876661492	1.0876325865297	0.981973476537457	1.2046604837561	0.111045354139415
ERBB4_Q15303_OID21510_v1_Oncology	10916_44_PLA2R1_PLA2R	82	Weighted mode	0.0193225456258335	0.0303472861552372	1.01951043422143	0.96063751649776	1.08199139387743	0.52610642778376
ERBB4_Q15303_OID21510_v1_Oncology	15305_7_SCGN_Secretagogin	82	MR Egger	-0.0462933	0.0594825537112813	0.954761869689656	0.849693888124493	1.07282191922714	0.438707300023209
ERBB4_Q15303_OID21510_v1_Oncology	15305_7_SCGN_Secretagogin	82	Weighted median	-0.010965	0.0229195676630384	0.989094934282521	0.945645690528034	1.03454052487361	0.632358062783845
ERBB4_Q15303_OID21510_v1_Oncology	15305_7_SCGN_Secretagogin	82	Inverse variance weighted	-0.0555825	0.0254133225163227	0.945933976485044	0.899971109438496	0.994244235714498	0.028732275328176
ERBB4_Q15303_OID21510_v1_Oncology	15305_7_SCGN_Secretagogin	82	Simple mode	-0.00456653	0.0426215720984108	0.995443877924213	0.915664897058568	1.08217374858415	0.914941771719228
ERBB4_Q15303_OID21510_v1_Oncology	15305_7_SCGN_Secretagogin	82	Weighted mode	-0.00854532	0.0296900316836304	0.991491088472131	0.935440459359381	1.05090021356664	0.774221356986321
ERBB4_Q15303_OID21510_v1_Oncology	16900_29_MDGA1_MDGA1	82	MR Egger	-0.0266726	0.0437706309934897	0.97368000369201	0.893630406915738	1.06090028075675	0.544005119091322
ERBB4_Q15303_OID21510_v1_Oncology	16900_29_MDGA1_MDGA1	82	Weighted median	0.0303147906218599	0.0206090924246262	1.0307789624379	0.989971592677435	1.07326844251253	0.141306658694171
ERBB4_Q15303_OID21510_v1_Oncology	16900_29_MDGA1_MDGA1	82	Inverse variance weighted	0.0610767774051199	0.0193167441670762	1.06298052394058	1.02348754686309	1.10399740352498	0.00156766676839096
ERBB4_Q15303_OID21510_v1_Oncology	16900_29_MDGA1_MDGA1	82	Simple mode	0.0127341396660849	0.0362271799889303	1.01281556407881	0.943394127371918	1.08734550817896	0.726120090372739
ERBB4_Q15303_OID21510_v1_Oncology	16900_29_MDGA1_MDGA1	82	Weighted mode	0.0167114814346466	0.0278129380493407	1.01685189934711	0.962903695226197	1.0738226370218	0.549615722044504
ERBB4_Q15303_OID21510_v1_Oncology	19361_78_MATN3_MATN3	82	MR Egger	-0.0128148	0.0434140460822757	0.987267001352451	0.906733871285547	1.07495282003479	0.768624607397899
ERBB4_Q15303_OID21510_v1_Oncology	19361_78_MATN3_MATN3	82	Weighted median	0.0168515450018575	0.0233462209194754	1.01699433322612	0.97150676376619	1.06461170666946	0.470411056026671
ERBB4_Q15303_OID21510_v1_Oncology	19361_78_MATN3_MATN3	82	Inverse variance weighted	0.0365686850596843	0.0185598263013398	1.03724554484329	1.00019144383209	1.07567238945294	0.0488023982384907
ERBB4_Q15303_OID21510_v1_Oncology	19361_78_MATN3_MATN3	82	Simple mode	-0.0013082	0.0526462386651593	0.998692658204085	0.900779459021793	1.10724885604503	0.980236663046986
ERBB4_Q15303_OID21510_v1_Oncology	19361_78_MATN3_MATN3	82	Weighted mode	0.01010954379841	0.0382381166726842	1.0101608178765	0.937220063294178	1.08877831145258	0.79215563755138
ERBB4_Q15303_OID21510_v1_Oncology	5491_12_SPOCK2_Testican_2	82	MR Egger	0.0124231882041134	0.0423207087793109	1.01250067655835	0.931904067926822	1.10006775945485	0.769862984406464
ERBB4_Q15303_OID21510_v1_Oncology	5491_12_SPOCK2_Testican_2	82	Weighted median	0.038967535260828	0.0227882100244386	1.03973672832054	0.994318842769106	1.08722918415993	0.0872683389627378
ERBB4_Q15303_OID21510_v1_Oncology	5491_12_SPOCK2_Testican_2	82	Inverse variance weighted	0.0506120021480161	0.018257198686901	1.05191467346034	1.01493837130242	1.09023809871454	0.00556844753025127
ERBB4_Q15303_OID21510_v1_Oncology	5491_12_SPOCK2_Testican_2	82	Simple mode	0.0675243615833971	0.0393997226301269	1.06985632267446	0.990347789746479	1.15574807458249	0.0903848918604892
ERBB4_Q15303_OID21510_v1_Oncology	5491_12_SPOCK2_Testican_2	82	Weighted mode	0.0378197008557937	0.0258087268950607	1.03854396740856	0.987315728314059	1.09243025438527	0.14668720030929
ERBB4_Q15303_OID21510_v1_Oncology	5660_51_SOD3_SOD3	82	MR Egger	0.00127710250101734	0.0483404197252443	1.00127791834368	0.910765230538581	1.10078584046275	0.978988980973943
ERBB4_Q15303_OID21510_v1_Oncology	5660_51_SOD3_SOD3	82	Weighted median	0.0251535259417535	0.0257966549591212	1.02547254507797	0.974912146909283	1.07865508091422	0.329525892486676
ERBB4_Q15303_OID21510_v1_Oncology	5660_51_SOD3_SOD3	82	Inverse variance weighted	0.0541684451488712	0.0208913692640265	1.0556624083909	1.01330915005848	1.09978590484982	0.00951808526060238
ERBB4_Q15303_OID21510_v1_Oncology	5660_51_SOD3_SOD3	82	Simple mode	0.0304016786752555	0.0488618779649925	1.03086852870649	0.936723058681997	1.13447610115708	0.535560368275448
ERBB4_Q15303_OID21510_v1_Oncology	5660_51_SOD3_SOD3	82	Weighted mode	0.0139268657851841	0.0311286895123976	1.0140242963559	0.954005954767082	1.07781850675252	0.655782980779144
ERBB4_Q15303_OID21510_v1_Oncology	6986_17_HS3ST3B1_HS3SB	82	MR Egger	-0.0430405	0.0351406083569519	0.957872616052582	0.894119297013281	1.02617173306549	0.224242021786308
ERBB4_Q15303_OID21510_v1_Oncology	6986_17_HS3ST3B1_HS3SB	82	Weighted median	-0.0349686	0.0224793599977878	0.965635759531399	0.924013938962506	1.00913241756153	0.119806583689978
ERBB4_Q15303_OID21510_v1_Oncology	6986_17_HS3ST3B1_HS3SB	82	Inverse variance weighted	-0.0309414	0.0150970150934142	0.969532393294382	0.941264079133652	0.998649669614834	0.0404128592824375
ERBB4_Q15303_OID21510_v1_Oncology	6986_17_HS3ST3B1_HS3SB	82	Simple mode	-0.0175705	0.0497571221797014	0.982582944445579	0.891281934778802	1.0832366337089	0.724911575087048
ERBB4_Q15303_OID21510_v1_Oncology	6986_17_HS3ST3B1_HS3SB	82	Weighted mode	-0.0380523	0.0302230680387562	0.962662609062379	0.907293310357752	1.02141092445769	0.211629497792748
FAS_P25445_OID20316_v1_Cardiometabolic	10024_44_HOGA1_HOGA1	43	MR Egger	-0.0428848	0.0467535327474115	0.95802172922413	0.87413387186047	1.04996003840027	0.364374406615244
FAS_P25445_OID20316_v1_Cardiometabolic	10024_44_HOGA1_HOGA1	43	Weighted median	0.00385133742163341	0.026800894162913	1.00385876335179	0.952487385977059	1.05800080042474	0.885735929463294
FAS_P25445_OID20316_v1_Cardiometabolic	10024_44_HOGA1_HOGA1	43	Inverse variance weighted	0.0587927418419516	0.0284919406134715	1.06055540919939	1.00295288945395	1.12146621023691	0.0390664057197237
FAS_P25445_OID20316_v1_Cardiometabolic	10024_44_HOGA1_HOGA1	43	Simple mode	-0.0402708	0.0423020248016568	0.960529266424829	0.88410203759718	1.04356333593135	0.346552086878959
FAS_P25445_OID20316_v1_Cardiometabolic	10024_44_HOGA1_HOGA1	43	Weighted mode	-0.00608331	0.0247017194148587	0.993935157738175	0.946959760576532	1.04324084181417	0.806672390754056
FAS_P25445_OID20316_v1_Cardiometabolic	11465_4_GPR135_GP135	43	MR Egger	-0.0530102	0.0454435547703362	0.948370326376914	0.867552213310071	1.03671717062498	0.250150118624309
FAS_P25445_OID20316_v1_Cardiometabolic	11465_4_GPR135_GP135	43	Weighted median	-0.00427475	0.0252585341765044	0.995734371713139	0.947639162916389	1.04627054031793	0.865607939413999
FAS_P25445_OID20316_v1_Cardiometabolic	11465_4_GPR135_GP135	43	Inverse variance weighted	0.0626959010704184	0.0285273300242003	1.06470301494932	1.00680538633799	1.12593012058204	0.0279670225131462
FAS_P25445_OID20316_v1_Cardiometabolic	11465_4_GPR135_GP135	43	Simple mode	0.0131115470593389	0.0430296611581677	1.01319788030064	0.931250857195251	1.10235597284446	0.762092237844922
FAS_P25445_OID20316_v1_Cardiometabolic	11465_4_GPR135_GP135	43	Weighted mode	0.0017528615439234	0.0234317508543805	1.00175439870373	0.95678806462125	1.04883402336286	0.940723362135613
FAS_P25445_OID20316_v1_Cardiometabolic	13056_18_SLC6A16_S6A16	43	MR Egger	-0.00567889	0.0483407144325929	0.994337200038931	0.904451411074565	1.09315597861315	0.907056143328385
FAS_P25445_OID20316_v1_Cardiometabolic	13056_18_SLC6A16_S6A16	43	Weighted median	0.0423155410140553	0.0256703097874445	1.04322360665609	0.992033634853905	1.09705503447452	0.0992658041000373
FAS_P25445_OID20316_v1_Cardiometabolic	13056_18_SLC6A16_S6A16	43	Inverse variance weighted	0.0652441294860176	0.0282942062382982	1.06741958117182	1.00983553934105	1.12828724864694	0.0211151948487988
FAS_P25445_OID20316_v1_Cardiometabolic	13056_18_SLC6A16_S6A16	43	Simple mode	-0.0252193	0.0466778544023351	0.975096066013382	0.889845098331799	1.06851444115079	0.591855065340316
FAS_P25445_OID20316_v1_Cardiometabolic	13056_18_SLC6A16_S6A16	43	Weighted mode	0.0363786130302718	0.0257158236341251	1.03704841221287	0.986073482501709	1.09065848373159	0.164545614688803
FAS_P25445_OID20316_v1_Cardiometabolic	13378_80_C5orf63_YD286	43	MR Egger	-0.0645031	0.0527851969366461	0.937533200694122	0.845385879539287	1.03972460822598	0.22868979368069
FAS_P25445_OID20316_v1_Cardiometabolic	13378_80_C5orf63_YD286	43	Weighted median	0.0120916069724912	0.0262338700818304	1.01216500599111	0.96143648114433	1.06557013327975	0.644858967532384
FAS_P25445_OID20316_v1_Cardiometabolic	13378_80_C5orf63_YD286	43	Inverse variance weighted	0.0693924225805712	0.0330630802500864	1.07185674741942	1.00459932988842	1.14361701507022	0.0358355224229486
FAS_P25445_OID20316_v1_Cardiometabolic	13378_80_C5orf63_YD286	43	Simple mode	0.0111398256205421	0.0394413661527441	1.01120210452183	0.935976179539014	1.09247405921483	0.778993280343844
FAS_P25445_OID20316_v1_Cardiometabolic	13378_80_C5orf63_YD286	43	Weighted mode	-0.00307848	0.0233794777829048	0.996926250328338	0.952274200623491	1.04367203053805	0.895870438854923
FAS_P25445_OID20316_v1_Cardiometabolic	13942_140_SPSB1_SPSB1	43	MR Egger	-0.0237038	0.0406393836763936	0.976574966744623	0.901805014235771	1.05754420369959	0.562905972420563
FAS_P25445_OID20316_v1_Cardiometabolic	13942_140_SPSB1_SPSB1	43	Weighted median	0.00222762405078075	0.0252035985509917	1.00223010704862	0.953923853256269	1.05298256673832	0.929570556990344
FAS_P25445_OID20316_v1_Cardiometabolic	13942_140_SPSB1_SPSB1	43	Inverse variance weighted	0.0503138358198301	0.0243384862750661	1.05160107467922	1.00261381278845	1.10298183224792	0.0387102157775224
FAS_P25445_OID20316_v1_Cardiometabolic	13942_140_SPSB1_SPSB1	43	Simple mode	-0.00695165	0.0385023906492696	0.993072452522771	0.920888476159013	1.07091458031157	0.857588236727848
FAS_P25445_OID20316_v1_Cardiometabolic	13942_140_SPSB1_SPSB1	43	Weighted mode	-0.0037609	0.021446330497949	0.996246161239953	0.955237087767095	1.0390157862331	0.861636798450929
FAS_P25445_OID20316_v1_Cardiometabolic	14135_3_RXFP1_RXFP1	43	MR Egger	-0.0402443	0.0447315336275357	0.960554777535249	0.879925464894692	1.04857231374275	0.373542175237717
FAS_P25445_OID20316_v1_Cardiometabolic	14135_3_RXFP1_RXFP1	43	Weighted median	-0.00560111	0.0247809428699173	0.994414542088268	0.947269386757452	1.04390608979937	0.821181904110404
FAS_P25445_OID20316_v1_Cardiometabolic	14135_3_RXFP1_RXFP1	43	Inverse variance weighted	0.0539769892817443	0.0272415726451498	1.05546031497571	1.00058367717052	1.11334664147113	0.047544223927542
FAS_P25445_OID20316_v1_Cardiometabolic	14135_3_RXFP1_RXFP1	43	Simple mode	0.0469615888612017	0.047110223716695	1.04808175029289	0.955639575948985	1.14946616166055	0.324548527005117
FAS_P25445_OID20316_v1_Cardiometabolic	14135_3_RXFP1_RXFP1	43	Weighted mode	-0.0122626	0.0238114041477077	0.987812242370461	0.942769942516356	1.03500650813338	0.609259839722532
FAS_P25445_OID20316_v1_Cardiometabolic	17231_1_LCP1_L_plastin	43	MR Egger	0.000911155210398596	0.042601137163405	1.00091157043841	0.92073126295309	1.08807424288419	0.983039859717123
FAS_P25445_OID20316_v1_Cardiometabolic	17231_1_LCP1_L_plastin	43	Weighted median	0.0199721537432545	0.0281120882451947	1.02017293163384	0.965482271551587	1.07796159609005	0.477426876332034
FAS_P25445_OID20316_v1_Cardiometabolic	17231_1_LCP1_L_plastin	43	Inverse variance weighted	0.0569448250125213	0.0249612498677217	1.05859740068581	1.00805302786236	1.11167609814646	0.0225289816182525
FAS_P25445_OID20316_v1_Cardiometabolic	17231_1_LCP1_L_plastin	43	Simple mode	-0.0307376	0.0449959540254352	0.969730014092741	0.887870258369573	1.05913706576809	0.498282955831792
FAS_P25445_OID20316_v1_Cardiometabolic	17231_1_LCP1_L_plastin	43	Weighted mode	0.00629111736856308	0.0265696173124194	1.00631094801126	0.95524700060697	1.06010458388654	0.813979612319632
FAS_P25445_OID20316_v1_Cardiometabolic	4931_59_F3_TF	43	MR Egger	0.000680043986152682	0.0517818349821072	1.00068027526849	0.904102669503882	1.10757444600944	0.989585486998647
FAS_P25445_OID20316_v1_Cardiometabolic	4931_59_F3_TF	43	Weighted median	0.0159036159668162	0.0253871345652116	1.01603075154487	0.966711505471418	1.0678661443896	0.531023812842244
FAS_P25445_OID20316_v1_Cardiometabolic	4931_59_F3_TF	43	Inverse variance weighted	0.0607977951425249	0.029974213079286	1.06268401259155	1.00205043678349	1.12698649605167	0.0425259001758915
FAS_P25445_OID20316_v1_Cardiometabolic	4931_59_F3_TF	43	Simple mode	0.0142745891072472	0.041315720003758	1.01437695756359	0.935471852321014	1.09993754433443	0.731442910211747
FAS_P25445_OID20316_v1_Cardiometabolic	4931_59_F3_TF	43	Weighted mode	0.0142745891072472	0.0249880838550628	1.01437695756359	0.965893156186363	1.06529444322663	0.570870658727049
FAS_P25445_OID20316_v1_Cardiometabolic	6119_14_MAMDC2_MAMC2	43	MR Egger	-0.00918136	0.0420145326333135	0.990860655206188	0.91253407771074	1.07591032709559	0.828101634368267
FAS_P25445_OID20316_v1_Cardiometabolic	6119_14_MAMDC2_MAMC2	43	Weighted median	0.00555450547025846	0.0242823654935694	1.00556996033723	0.958832451638318	1.05458565091834	0.819065971794464
FAS_P25445_OID20316_v1_Cardiometabolic	6119_14_MAMDC2_MAMC2	43	Inverse variance weighted	0.0602357618743725	0.0250076776271462	1.06208691663255	1.01128390205163	1.11544207931478	0.0160098573559667
FAS_P25445_OID20316_v1_Cardiometabolic	6119_14_MAMDC2_MAMC2	43	Simple mode	0.00976228247725414	0.0432950073818984	1.00981008899711	0.927654490317375	1.09924161040981	0.822697257875731
FAS_P25445_OID20316_v1_Cardiometabolic	6119_14_MAMDC2_MAMC2	43	Weighted mode	0.00176272180129217	0.0223783498002452	1.00176427630862	0.958775006916747	1.04668108581107	0.937590405933685
FAS_P25445_OID20316_v1_Cardiometabolic	6600_70_RELL2_RELL2	43	MR Egger	-0.0482356	0.0419526535806108	0.95290922946731	0.877689117775129	1.03457588936021	0.256904003845828
FAS_P25445_OID20316_v1_Cardiometabolic	6600_70_RELL2_RELL2	43	Weighted median	0.0123323083429692	0.0268356584246332	1.01240866481853	0.960534304489929	1.06708453806231	0.64583974973897
FAS_P25445_OID20316_v1_Cardiometabolic	6600_70_RELL2_RELL2	43	Inverse variance weighted	0.0557202386129109	0.0262329254540414	1.05730185012497	1.00431297895991	1.11308648369295	0.0336653467285579
FAS_P25445_OID20316_v1_Cardiometabolic	6600_70_RELL2_RELL2	43	Simple mode	-0.00804671	0.0411450607041997	0.991985579511952	0.915128279310437	1.07529776120693	0.845890435068264
FAS_P25445_OID20316_v1_Cardiometabolic	6600_70_RELL2_RELL2	43	Weighted mode	0.00180917249251611	0.0246401685954007	1.00181081003245	0.954578346534365	1.05138033220801	0.9418175272014
FAS_P25445_OID20316_v1_Cardiometabolic	6986_17_HS3ST3B1_HS3SB	43	MR Egger	-0.0617732	0.0589964773020704	0.940096050841843	0.837439444724415	1.05533670568773	0.301202670198795
FAS_P25445_OID20316_v1_Cardiometabolic	6986_17_HS3ST3B1_HS3SB	43	Weighted median	-0.00823878	0.0259000612617688	0.991795067369346	0.942704036796027	1.04344249866727	0.750409995471827
FAS_P25445_OID20316_v1_Cardiometabolic	6986_17_HS3ST3B1_HS3SB	43	Inverse variance weighted	0.0780918814618277	0.0367372275038997	1.08122199836404	1.00610547846919	1.16194676876729	0.0335292517521907
FAS_P25445_OID20316_v1_Cardiometabolic	6986_17_HS3ST3B1_HS3SB	43	Simple mode	0.024061453516776	0.0408781209381321	1.02435326606703	0.945482723378297	1.10980305378077	0.559272373768804
FAS_P25445_OID20316_v1_Cardiometabolic	6986_17_HS3ST3B1_HS3SB	43	Weighted mode	-0.00449881	0.0252312768244329	0.995511296068277	0.947477479175933	1.04598026061949	0.859342412840568
FAS_P25445_OID20316_v1_Cardiometabolic	7003_4_GALNT10_GLT10	43	MR Egger	-0.0182088	0.0324374070178978	0.981955989122877	0.921469033412707	1.04641342205845	0.577613499784528
FAS_P25445_OID20316_v1_Cardiometabolic	7003_4_GALNT10_GLT10	43	Weighted median	0.000163174951191381	0.0252508763711396	1.00016318826495	0.951868348888501	1.05090835757738	0.994843986156551
FAS_P25445_OID20316_v1_Cardiometabolic	7003_4_GALNT10_GLT10	43	Inverse variance weighted	0.0528353512224376	0.0198329184916593	1.05425604885886	1.01406076659186	1.09604458940954	0.00772122809580334
FAS_P25445_OID20316_v1_Cardiometabolic	7003_4_GALNT10_GLT10	43	Simple mode	0.0362127691112087	0.0503621928109418	1.03687643830074	0.93941576006179	1.14444827733411	0.476093968251989
FAS_P25445_OID20316_v1_Cardiometabolic	7003_4_GALNT10_GLT10	43	Weighted mode	-0.00338386	0.0251759337327905	0.996621863674467	0.948637356899028	1.04703354968098	0.893721736920431
FAS_P25445_OID20316_v1_Cardiometabolic	9092_33_ANGPTL1_ANGL1	43	MR Egger	-0.0402236	0.0526352038806157	0.960574607245315	0.866417292930743	1.06496440411912	0.449126201978594
FAS_P25445_OID20316_v1_Cardiometabolic	9092_33_ANGPTL1_ANGL1	43	Weighted median	-0.00236373	0.0276512353980326	0.997639058554546	0.945009636446693	1.05319951539959	0.931876768715549
FAS_P25445_OID20316_v1_Cardiometabolic	9092_33_ANGPTL1_ANGL1	43	Inverse variance weighted	0.0626564542856363	0.0315305076804943	1.06466101666699	1.00085702626919	1.13253247033261	0.0469036477988438
FAS_P25445_OID20316_v1_Cardiometabolic	9092_33_ANGPTL1_ANGL1	43	Simple mode	-0.0232048	0.040921778199663	0.977062341349977	0.901755819830368	1.05865778505747	0.573696521868374
FAS_P25445_OID20316_v1_Cardiometabolic	9092_33_ANGPTL1_ANGL1	43	Weighted mode	-0.016501	0.0254978623785683	0.983634386415366	0.9356846050007	1.03404138634728	0.521054705987222
FAS_P25445_OID20316_v1_Cardiometabolic	9783_75_DNAJC11_DJC11	43	MR Egger	-0.0220092	0.0438929412338613	0.978231236984484	0.89759226374034	1.06611475128424	0.618751037075814
FAS_P25445_OID20316_v1_Cardiometabolic	9783_75_DNAJC11_DJC11	43	Weighted median	0.0139552628274293	0.0263590105998945	1.01405309205553	0.962993710894465	1.06781971873135	0.596506879998405
FAS_P25445_OID20316_v1_Cardiometabolic	9783_75_DNAJC11_DJC11	43	Inverse variance weighted	0.0531460873830958	0.0261927241318668	1.05458369523899	1.00180998413207	1.1101374391147	0.0424542069336836
FAS_P25445_OID20316_v1_Cardiometabolic	9783_75_DNAJC11_DJC11	43	Simple mode	0.0296754609326202	0.0409305577018165	1.03012016546084	0.950707882718199	1.11616572722119	0.472460182224705
FAS_P25445_OID20316_v1_Cardiometabolic	9783_75_DNAJC11_DJC11	43	Weighted mode	0.0138769634995082	0.0250045902904518	1.01397369548834	0.965477932440273	1.06490539099492	0.581854476243759
FLT3LG_P49771_OID20661_v1_Inflammation	11358_15_GRB10_GRB10	88	MR Egger	-0.0557117	0.0274352069421973	0.945811755322706	0.896295854743587	0.99806316382277	0.0453780568441864
FLT3LG_P49771_OID20661_v1_Inflammation	11358_15_GRB10_GRB10	88	Weighted median	-0.0586548	0.0236566930146551	0.943032251475173	0.900304792808007	0.987787507549105	0.0131597522624273
FLT3LG_P49771_OID20661_v1_Inflammation	11358_15_GRB10_GRB10	88	Inverse variance weighted	-0.0541809	0.0169936751276276	0.947260723892716	0.916229397858611	0.979343034754078	0.00143112740462397
[truncated: 5,982 more rows]
