# Supplementary material for: Integrated multi-omics reveals the ITGB2-IL2RB-NK axis in promoting papillary thyroid carcinoma progression and immune microenvironment crosstalk
Source: Research Square preprint supplement (doi:10.21203/rs.3.rs-7218110/v1), 2025-08-21
Supplement: Supplementary file 5 [file e7f1e087c946070f1b23a53d.xlsx]

## Sheet: Sheet1
Table S7 Mendelian Randomization analysis of PTC-associated immune cell phenotypes and their relationship with IL2RB protein.
Exposure	Outcome	nsnp	method	beta	se	or	or_lci95	or_uci95	pvalue
Resting Treg AC	papillary thyroid carcinoma	11	Inverse variance weighted	0.100884	0.0419911	1.10615	1.01876	1.20104	0.016283
CD39+ resting Treg %resting Treg	papillary thyroid carcinoma	88	Inverse variance weighted	0.0524326	0.0199566	1.05383	1.01341	1.09587	0.0086058
CD39+ activated Treg AC	papillary thyroid carcinoma	84	Inverse variance weighted	0.0471641	0.0232249	1.04829	1.00164	1.09712	0.0422799
CD39+ activated Treg %CD4 Treg	papillary thyroid carcinoma	85	Inverse variance weighted	0.0461214	0.0227833	1.0472	1.00147	1.09502	0.0429338
CD39+ secreting Treg %secreting Treg	papillary thyroid carcinoma	107	Inverse variance weighted	0.0408714	0.0184382	1.04172	1.00474	1.08005	0.026646
CD39+ secreting Treg %CD4 Treg	papillary thyroid carcinoma	104	Inverse variance weighted	0.0379219	0.0190824	1.03865	1.00052	1.07823	0.0468916
CD25hi %CD4+	papillary thyroid carcinoma	3	Inverse variance weighted	0.302263	0.129535	1.35292	1.04956	1.74395	0.0196248
CD33dim HLA DR+ CD11b+ %CD33dim HLA DR+	papillary thyroid carcinoma	5	Inverse variance weighted	-0.0943863	0.0441071	0.909931	0.834572	0.992095	0.03236
CD33dim HLA DR+ CD11b- %CD33dim HLA DR+	papillary thyroid carcinoma	5	Inverse variance weighted	0.0948936	0.0442641	1.09954	1.00817	1.1992	0.0320487
CD8dim %leukocyte	papillary thyroid carcinoma	5	Inverse variance weighted	-0.228861	0.11295	0.795439	0.637473	0.992549	0.0427424
HLA DR+ CD8br %T cell	papillary thyroid carcinoma	8	Inverse variance weighted	-0.148217	0.0741342	0.862244	0.745635	0.99709	0.0455755
CD8dim NKT AC	papillary thyroid carcinoma	11	Inverse variance weighted	-0.193501	0.0745026	0.824069	0.712108	0.953633	0.00939761
B cell % CD3- lymphocyte	papillary thyroid carcinoma	4	Inverse variance weighted	-0.195283	0.075671	0.822602	0.709214	0.954118	0.00986042
NK AC	papillary thyroid carcinoma	3	Inverse variance weighted	0.329017	0.142991	1.3896	1.04996	1.83911	0.0213935
NK %CD3- lymphocyte	papillary thyroid carcinoma	5	Inverse variance weighted	0.194155	0.0759493	1.21428	1.04634	1.40919	0.010577
NK %lymphocyte	papillary thyroid carcinoma	3	Inverse variance weighted	0.257275	0.12629	1.2934	1.0098	1.65666	0.0416312
CD39+ CD4+ %CD4+	papillary thyroid carcinoma	116	Inverse variance weighted	0.0375741	0.0185882	1.03829	1.00114	1.07681	0.0432392
CD28- CD8dim %T cell	papillary thyroid carcinoma	5	Inverse variance weighted	-0.269584	0.114615	0.763697	0.610041	0.956057	0.0186688
CD45RA- CD28- CD8br %CD8br	papillary thyroid carcinoma	19	Inverse variance weighted	-0.00297678	0.00150235	0.997028	0.994096	0.999968	0.0475445
CD25 on IgD+ CD38- naive	papillary thyroid carcinoma	6	Inverse variance weighted	-0.155	0.0746106	0.856415	0.739903	0.991275	0.0377596
CD25 on IgD+ CD38br	papillary thyroid carcinoma	7	Inverse variance weighted	-0.186754	0.0896463	0.829648	0.695961	0.989013	0.0372298
CD16-CD56 on NKT	papillary thyroid carcinoma	22	Inverse variance weighted	-0.134255	0.0468057	0.874367	0.797722	0.958375	0.00412608
CD33 on CD33dim HLA DR+ CD11b+	papillary thyroid carcinoma	44	Inverse variance weighted	0.0424951	0.0195291	1.04341	1.00423	1.08412	0.0295562
CD33 on CD33dim HLA DR+ CD11b-	papillary thyroid carcinoma	46	Inverse variance weighted	0.0449827	0.0202342	1.04601	1.00534	1.08833	0.0262088
CD33 on Gr MDSC	papillary thyroid carcinoma	9	Inverse variance weighted	0.0811376	0.0378504	1.08452	1.00698	1.16804	0.0320617
CD33 on Mo MDSC	papillary thyroid carcinoma	31	Inverse variance weighted	0.0458352	0.021898	1.0469	1.00292	1.09281	0.036338
FSC-A on NK	papillary thyroid carcinoma	3	Inverse variance weighted	-0.26909	0.126277	0.764075	0.59655	0.978644	0.0330933
CD14 on CD14+ CD16+ monocyte	papillary thyroid carcinoma	3	Inverse variance weighted	-0.337455	0.124269	0.713584	0.559326	0.910385	0.00661727
CX3CR1 on CD14+ CD16+ monocyte	papillary thyroid carcinoma	11	Inverse variance weighted	0.107668	0.0492659	1.11368	1.01117	1.22658	0.0288557
CD80 on granulocyte	papillary thyroid carcinoma	4	Inverse variance weighted	0.243876	0.118739	1.27619	1.01121	1.6106	0.0399874
CD11c on granulocyte	papillary thyroid carcinoma	5	Inverse variance weighted	-0.201192	0.0776839	0.817755	0.702259	0.952246	0.00960093
CD45RA on naive CD8br	papillary thyroid carcinoma	8	Inverse variance weighted	0.252077	0.08946	1.2867	1.07976	1.53329	0.00483595
IL2RB	CD33dim HLA DR+ CD11b+ %CD33dim HLA DR+	36	Inverse variance weighted	0.304885	0.0917099	1.35647	1.1333	1.62358	0.000885944
IL2RB	CD33dim HLA DR+ CD11b- %CD33dim HLA DR+	36	Inverse variance weighted	-0.320503	0.0917694	0.725784	0.606305	0.868806	0.000478547
IL2RB	NK AC	35	Inverse variance weighted	0.186952	0.091861	1.20557	1.00693	1.4434	0.0418341
IL2RB	CD14 on CD14+ CD16+ monocyte	36	Inverse variance weighted	0.255569	0.0664483	1.2912	1.13352	1.4708	0.000119998
IL2RB	CD80 on granulocyte	36	Inverse variance weighted	0.154572	0.0754562	1.16716	1.0067	1.35319	0.040511
