# Supplementary material for: Integrated multi-omics reveals the ITGB2-IL2RB-NK axis in promoting papillary thyroid carcinoma progression and immune microenvironment crosstalk
Source: Research Square preprint supplement (doi:10.21203/rs.3.rs-7218110/v1), 2025-08-21
Supplement: Supplementary file 6 [file efdf5f832fde35f492324810.xlsx]

## Sheet: Sheet1
TableS1 Detailed information about 731 immunological traits.
Trait	N samples	Statistical trait name	Trait type	Panel	GWAS Catalog Accession Number
IgD+ %B cell	3756	BC_Trait1	Relative count	B cell	GCST90001391
IgD+ CD38br AC	3754	BC_Trait10	Absolute count	B cell	GCST90001392
IgD+ CD38dim %B cell	3755	BC_Trait11	Relative count	B cell	GCST90001393
IgD+ CD38dim AC	3754	BC_Trait12	Absolute count	B cell	GCST90001394
IgD+ CD38- %B cell	3755	BC_Trait13	Relative count	B cell	GCST90001395
IgD+ CD38- AC	3754	BC_Trait14	Absolute count	B cell	GCST90001396
Unsw mem %B cell	3755	BC_Trait17	Relative count	B cell	GCST90001397
Unsw mem AC	3754	BC_Trait18	Absolute count	B cell	GCST90001398
IgD- CD27- %B cell	3755	BC_Trait19	Relative count	B cell	GCST90001399
IgD+ AC	3755	BC_Trait2	Absolute count	B cell	GCST90001400
IgD- CD27- AC	3754	BC_Trait20	Absolute count	B cell	GCST90001401
Sw mem %B cell	3755	BC_Trait21	Relative count	B cell	GCST90001402
Sw mem AC	3754	BC_Trait22	Absolute count	B cell	GCST90001403
PB/PC %B cell	3756	BC_Trait23	Relative count	B cell	GCST90001404
PB/PC AC	3755	BC_Trait24	Absolute count	B cell	GCST90001405
Memory B cell %B cell	3755	BC_Trait25	Relative count	B cell	GCST90001406
Memory B cell AC	3754	BC_Trait26	Absolute count	B cell	GCST90001407
Naive-mature B cell %B cell	3755	BC_Trait27	Relative count	B cell	GCST90001408
Naive-mature B cell AC	3754	BC_Trait28	Absolute count	B cell	GCST90001409
IgD- CD38br %B cell	3755	BC_Trait3	Relative count	B cell	GCST90001410
IgD+ CD24+ %B cell	3755	BC_Trait31	Relative count	B cell	GCST90001411
IgD+ CD24+ AC	3754	BC_Trait32	Absolute count	B cell	GCST90001412
IgD- CD24- %B cell	3755	BC_Trait33	Relative count	B cell	GCST90001413
IgD- CD24- AC	3754	BC_Trait34	Absolute count	B cell	GCST90001414
IgD+ CD24- %B cell	3755	BC_Trait35	Relative count	B cell	GCST90001415
IgD+ CD24- AC	3754	BC_Trait36	Absolute count	B cell	GCST90001416
CD24+ CD27+ %B cell	3755	BC_Trait37	Relative count	B cell	GCST90001417
CD24+ CD27+ AC	3754	BC_Trait38	Absolute count	B cell	GCST90001418
CD20- %B cell	3756	BC_Trait39	Relative count	B cell	GCST90001419
IgD- CD38br AC	3754	BC_Trait4	Absolute count	B cell	GCST90001420
CD20- AC	3755	BC_Trait40	Absolute count	B cell	GCST90001421
CD20- CD38- %B cell	3757	BC_Trait43	Relative count	B cell	GCST90001422
CD20- CD38- AC	3756	BC_Trait44	Absolute count	B cell	GCST90001423
IgD+ %Lymphocyte	3755	BC_Trait46	Relative count	B cell	GCST90001424
IgD- CD38br %lymphocyte	3754	BC_Trait47	Relative count	B cell	GCST90001425
IgD- CD38dim %lymphocyte	3754	BC_Trait48	Relative count	B cell	GCST90001426
IgD- CD38- %lymphocyte	3754	BC_Trait49	Relative count	B cell	GCST90001427
IgD- CD38dim %B cell	3755	BC_Trait5	Relative count	B cell	GCST90001428
IgD+ CD38br %lymphocyte	3754	BC_Trait50	Relative count	B cell	GCST90001429
IgD+ CD38dim %lymphocyte	3754	BC_Trait51	Relative count	B cell	GCST90001430
IgD+ CD38- %lymphocyte	3754	BC_Trait52	Relative count	B cell	GCST90001431
Unsw Mem %lymphocyte	3754	BC_Trait54	Relative count	B cell	GCST90001432
IgD- CD27- %lymphocyte	3754	BC_Trait55	Relative count	B cell	GCST90001433
Sw mem %lymphocyte	3754	BC_Trait56	Relative count	B cell	GCST90001434
PB/PC %lymphocyte	3755	BC_Trait57	Relative count	B cell	GCST90001435
Memory B cell %lymphocyte	3754	BC_Trait58	Relative count	B cell	GCST90001436
Naive-mature B cell %lymphocyte	3754	BC_Trait59	Relative count	B cell	GCST90001437
IgD- CD38dim AC	3754	BC_Trait6	Absolute count	B cell	GCST90001438
IgD+ CD24+ %lymphocyte	3754	BC_Trait61	Relative count	B cell	GCST90001439
IgD- CD24- %lymphocyte	3754	BC_Trait62	Relative count	B cell	GCST90001440
IgD+ CD24- %lymphocyte	3754	BC_Trait63	Relative count	B cell	GCST90001441
CD24+ CD27+ %lymphocyte	3754	BC_Trait64	Relative count	B cell	GCST90001442
CD20- %lymphocyte	3755	BC_Trait65	Relative count	B cell	GCST90001443
CD20- CD38- %lymphocyte	3756	BC_Trait67	Relative count	B cell	GCST90001444
IgD- CD38- %B cell	3755	BC_Trait7	Relative count	B cell	GCST90001445
IgD- CD38- AC	3754	BC_Trait8	Absolute count	B cell	GCST90001446
IgD+ CD38br %B cell	3755	BC_Trait9	Relative count	B cell	GCST90001447
CD11c+ monocyte AC	3020	DC_Trait524	Absolute count	cDC	GCST90001448
CD11c+ monocyte %monocyte	3043	DC_Trait525	Relative count	cDC	GCST90001449
CD62L- monocyte AC	3019	DC_Trait526	Absolute count	cDC	GCST90001450
CD62L- monocyte %monocyte	3042	DC_Trait527	Relative count	cDC	GCST90001451
CD11c+ CD62L- monocyte AC	3017	DC_Trait530	Absolute count	cDC	GCST90001452
CD11c+ CD62L- monocyte %monocyte	3040	DC_Trait531	Relative count	cDC	GCST90001453
CD62L- HLA DR++ monocyte AC	3018	DC_Trait532	Absolute count	cDC	GCST90001454
CD62L- HLA DR++ monocyte %monocyte	3041	DC_Trait533	Relative count	cDC	GCST90001455
CD11c+ HLA DR++ monocyte AC	3019	DC_Trait534	Absolute count	cDC	GCST90001456
CD11c+ HLA DR++ monocyte %monocyte	3042	DC_Trait535	Relative count	cDC	GCST90001457
Myeloid DC AC	3387	f_DC_Trait502	Absolute count	cDC	GCST90001458
Myeloid DC %DC	3410	f_DC_Trait503	Relative count	cDC	GCST90001459
Plasmacytoid DC AC	3374	f_DC_Trait504	Absolute count	cDC	GCST90001460
DC AC	3374	f_DC_Trait505	Absolute count	cDC	GCST90001461
CD62L- DC AC	3387	f_DC_Trait508	Absolute count	cDC	GCST90001462
CD62L- DC %DC	3410	f_DC_Trait509	Relative count	cDC	GCST90001463
CD86+ myeloid DC AC	3387	f_DC_Trait512	Absolute count	cDC	GCST90001464
CD86+ myeloid DC %DC	3410	f_DC_Trait513	Relative count	cDC	GCST90001465
CD86+ plasmacytoid DC AC	3374	f_DC_Trait514	Absolute count	cDC	GCST90001466
CD86+ plasmacytoid DC %DC	3410	f_DC_Trait515	Relative count	cDC	GCST90001467
CD62L- myeloid DC AC	3387	f_DC_Trait516	Absolute count	cDC	GCST90001468
CD62L- myeloid DC %DC	3410	f_DC_Trait517	Relative count	cDC	GCST90001469
CD62L- plasmacytoid DC AC	3374	f_DC_Trait518	Absolute count	cDC	GCST90001470
CD62L- plasmacytoid DC %DC	3410	f_DC_Trait519	Relative count	cDC	GCST90001471
CD62L- CD86+ myeloid DC AC	3387	f_DC_Trait520	Absolute count	cDC	GCST90001472
CD62L- CD86+ myeloid DC %DC	3410	f_DC_Trait521	Relative count	cDC	GCST90001473
Plasmacytoid DC %DC	3410	f_DC_Trait522	Relative count	cDC	GCST90001474
HLA DR++ monocyte %monocyte	3595	f_MONO_Trait503	Relative count	TBNK	GCST90001475
HLA DR++ monocyte %leukocyte	3595	f_MONO_Trait504	Relative count	TBNK	GCST90001476
HLA DR++ monocyte AC	3579	f_MONO_Trait505	Absolute count	TBNK	GCST90001477
CD4 Treg %CD4	3437	f_Treg_Trait501	Relative count	Treg	GCST90001478
CD4 Treg %T cell	3437	f_Treg_Trait502	Relative count	Treg	GCST90001479
Resting Treg AC	3405	f_Treg_Trait503	Absolute count	Treg	GCST90001480
Resting Treg % CD4 Treg	3437	f_Treg_Trait504	Relative count	Treg	GCST90001481
Resting Treg %CD4	3437	f_Treg_Trait505	Relative count	Treg	GCST90001482
CD39+ resting Treg AC	3405	f_Treg_Trait506	Absolute count	Treg	GCST90001483
CD39+ resting Treg %resting Treg	3437	f_Treg_Trait507	Relative count	Treg	GCST90001484
CD39+ resting Treg % CD4 Treg	3437	f_Treg_Trait508	Relative count	Treg	GCST90001485
Activated Treg AC	3405	f_Treg_Trait509	Absolute count	Treg	GCST90001486
Activated Treg %CD4 Treg	3437	f_Treg_Trait510	Relative count	Treg	GCST90001487
Activated Treg %CD4	3437	f_Treg_Trait511	Relative count	Treg	GCST90001488
CD39+ activated Treg AC	3405	f_Treg_Trait512	Absolute count	Treg	GCST90001489
CD39+ activated Treg %activated Treg	3437	f_Treg_Trait513	Relative count	Treg	GCST90001490
CD39+ activated Treg %CD4 Treg	3437	f_Treg_Trait514	Relative count	Treg	GCST90001491
Secreting Treg AC	3405	f_Treg_Trait515	Absolute count	Treg	GCST90001492
Secreting Treg % CD4 Treg	3437	f_Treg_Trait516	Relative count	Treg	GCST90001493
Secreting Treg %CD4	3437	f_Treg_Trait517	Relative count	Treg	GCST90001494
CD39+ secreting Treg AC	3405	f_Treg_Trait518	Absolute count	Treg	GCST90001495
CD39+ secreting Treg %secreting Treg	3437	f_Treg_Trait519	Relative count	Treg	GCST90001496
CD39+ secreting Treg %CD4 Treg	3437	f_Treg_Trait520	Relative count	Treg	GCST90001497
Activated & resting Treg AC	3405	f_Treg_Trait521	Absolute count	Treg	GCST90001498
Activated & resting Treg % CD4 Treg	3437	f_Treg_Trait522	Relative count	Treg	GCST90001499
Activated & resting Treg %CD4+	3437	f_Treg_Trait523	Relative count	Treg	GCST90001500
Activated & secreting Treg AC	3405	f_Treg_Trait527	Absolute count	Treg	GCST90001501
Activated & secreting Treg %CD4 Treg	3437	f_Treg_Trait528	Relative count	Treg	GCST90001502
Activated & secreting Treg %CD4+	3437	f_Treg_Trait529	Relative count	Treg	GCST90001503
CD25hi AC	3405	f_Treg_Trait533	Absolute count	Treg	GCST90001504
CD25hi %CD4+	3437	f_Treg_Trait534	Relative count	Treg	GCST90001505
CD25hi %T cell	3437	f_Treg_Trait535	Relative count	Treg	GCST90001506
CD25hi CD45RA+ CD4 not Treg AC	3405	f_Treg_Trait536	Absolute count	Treg	GCST90001507
CD25hi CD45RA+ CD4 not Treg %CD4+	3437	f_Treg_Trait537	Relative count	Treg	GCST90001508
CD25hi CD45RA+ CD4 not Treg %T cell	3437	f_Treg_Trait538	Relative count	Treg	GCST90001509
CD25hi CD45RA- CD4 not Treg AC	3405	f_Treg_Trait539	Absolute count	Treg	GCST90001510
CD25hi CD45RA- CD4 not Treg %CD4+	3437	f_Treg_Trait540	Relative count	Treg	GCST90001511
CD25hi CD45RA- CD4 not Treg %T cell	3437	f_Treg_Trait541	Relative count	Treg	GCST90001512
CD4 Treg AC	3405	f_Treg_Trait542	Absolute count	Treg	GCST90001513
HSC AC	1930	MDSC_Trait1	Absolute count	Myeloid cell	GCST90001514
Im MDSC AC	1929	MDSC_Trait10	Absolute count	Myeloid cell	GCST90001515
Im MDSC %CD33dim HLA DR- CD66b-	1929	MDSC_Trait11	Relative count	Myeloid cell	GCST90001516
CD33br HLA DR+ AC	1930	MDSC_Trait12	Absolute count	Myeloid cell	GCST90001517
CD33br HLA DR+ CD14- AC	1930	MDSC_Trait13	Absolute count	Myeloid cell	GCST90001518
CD33br HLA DR+ CD14- %CD33br HLA DR+	1930	MDSC_Trait14	Relative count	Myeloid cell	GCST90001519
CD33br HLA DR+ CD14dim AC	1930	MDSC_Trait15	Absolute count	Myeloid cell	GCST90001520
CD33br HLA DR+ CD14dim %CD33br HLA DR+	1930	MDSC_Trait16	Relative count	Myeloid cell	GCST90001521
CD33- HLA DR- AC	1930	MDSC_Trait22	Absolute count	Myeloid cell	GCST90001522
CD33- HLA DR+ AC	1930	MDSC_Trait23	Absolute count	Myeloid cell	GCST90001523
Gr MDSC AC	1928	MDSC_Trait24	Absolute count	Myeloid cell	GCST90001524
CD33dim HLA DR+ CD11b+ AC	1930	MDSC_Trait25	Absolute count	Myeloid cell	GCST90001525
CD33dim HLA DR+ CD11b+ %CD33dim HLA DR+	1930	MDSC_Trait26	Relative count	Myeloid cell	GCST90001526
CD33dim HLA DR+ CD11b- AC	1930	MDSC_Trait27	Absolute count	Myeloid cell	GCST90001527
CD33dim HLA DR+ CD11b- %CD33dim HLA DR+	1930	MDSC_Trait28	Relative count	Myeloid cell	GCST90001528
CD66b++ myeloid cell AC	1930	MDSC_Trait3	Absolute count	Myeloid cell	GCST90001529
Mo MDSC AC	1927	MDSC_Trait4	Absolute count	Myeloid cell	GCST90001530
CD33dim HLA DR- AC	1874	MDSC_Trait5	Absolute count	Myeloid cell	GCST90001531
Basophil AC	1929	MDSC_Trait8	Absolute count	Myeloid cell	GCST90001532
Basophil %CD33dim HLA DR- CD66b-	1929	MDSC_Trait9	Relative count	Myeloid cell	GCST90001533
CD45RA- CD4+ AC	3395	MT_ry_Trait514	Absolute count	Maturation stages of T cell	GCST90001534
CD45RA- CD4+ %CD4+	3427	MT_ry_Trait515	Relative count	Maturation stages of T cell	GCST90001535
CD45RA- CD4+ %T cell	3427	MT_ry_Trait516	Relative count	Maturation stages of T cell	GCST90001536
CM CD4+ AC	3395	MT_Trait503	Absolute count	Maturation stages of T cell	GCST90001537
CM CD4+ %CD4+	3427	MT_Trait504	Relative count	Maturation stages of T cell	GCST90001538
CM CD4+ %T cell	3427	MT_Trait505	Relative count	Maturation stages of T cell	GCST90001539
Naive CD4+ AC	3395	MT_Trait506	Absolute count	Maturation stages of T cell	GCST90001540
Naive CD4+ %CD4+	3427	MT_Trait507	Relative count	Maturation stages of T cell	GCST90001541
EM CD4+ AC	3395	MT_Trait508	Absolute count	Maturation stages of T cell	GCST90001542
EM CD4+ %CD4+	3427	MT_Trait509	Relative count	Maturation stages of T cell	GCST90001543
EM CD4+ %T cell	3427	MT_Trait510	Relative count	Maturation stages of T cell	GCST90001544
TD CD4+ AC	3395	MT_Trait511	Absolute count	Maturation stages of T cell	GCST90001545
TD CD4+ %CD4+	3427	MT_Trait512	Relative count	Maturation stages of T cell	GCST90001546
TD CD4+ %T cell	3427	MT_Trait513	Relative count	Maturation stages of T cell	GCST90001547
CM CD8br AC	3395	MT_Trait522	Absolute count	Maturation stages of T cell	GCST90001548
CM CD8br %CD8br	3427	MT_Trait523	Relative count	Maturation stages of T cell	GCST90001549
CM CD8br %T cell	3427	MT_Trait524	Relative count	Maturation stages of T cell	GCST90001550
Naive CD8br AC	3395	MT_Trait525	Absolute count	Maturation stages of T cell	GCST90001551
Naive CD8br %CD8br	3427	MT_Trait526	Relative count	Maturation stages of T cell	GCST90001552
Naive CD8br %T cell	3427	MT_Trait527	Relative count	Maturation stages of T cell	GCST90001553
EM CD8br AC	3395	MT_Trait528	Absolute count	Maturation stages of T cell	GCST90001554
EM CD8br %CD8br	3427	MT_Trait529	Relative count	Maturation stages of T cell	GCST90001555
EM CD8br %T cell	3427	MT_Trait530	Relative count	Maturation stages of T cell	GCST90001556
TD CD8br AC	3395	MT_Trait531	Absolute count	Maturation stages of T cell	GCST90001557
TD CD8br %CD8br	3427	MT_Trait532	Relative count	Maturation stages of T cell	GCST90001558
TD CD8br %T cell	3427	MT_Trait533	Relative count	Maturation stages of T cell	GCST90001559
CD45RA+ CD8br AC	3395	MT_Trait537	Absolute count	Maturation stages of T cell	GCST90001560
CD45RA+ CD8br %CD8br	3427	MT_Trait538	Relative count	Maturation stages of T cell	GCST90001561
CD45RA+ CD8br %T cell	3427	MT_Trait539	Relative count	Maturation stages of T cell	GCST90001562
CM DN (CD4-CD8-) AC	3395	MT_Trait542	Absolute count	Maturation stages of T cell	GCST90001563
CM DN (CD4-CD8-) %DN	3427	MT_Trait543	Relative count	Maturation stages of T cell	GCST90001564
CM DN (CD4-CD8-) %T cell	3427	MT_Trait544	Relative count	Maturation stages of T cell	GCST90001565
Naive DN (CD4-CD8-) AC	3395	MT_Trait545	Absolute count	Maturation stages of T cell	GCST90001566
Naive DN (CD4-CD8-) %DN	3427	MT_Trait546	Relative count	Maturation stages of T cell	GCST90001567
Naive DN (CD4-CD8-) %T cell	3427	MT_Trait547	Relative count	Maturation stages of T cell	GCST90001568
EM DN (CD4-CD8-) AC	3395	MT_Trait548	Absolute count	Maturation stages of T cell	GCST90001569
EM DN (CD4-CD8-) %DN	3427	MT_Trait549	Relative count	Maturation stages of T cell	GCST90001570
EM DN (CD4-CD8-) %T cell	3427	MT_Trait550	Relative count	Maturation stages of T cell	GCST90001571
TD DN (CD4-CD8-) AC	3395	MT_Trait551	Absolute count	Maturation stages of T cell	GCST90001572
TD DN (CD4-CD8-) %DN	3427	MT_Trait552	Relative count	Maturation stages of T cell	GCST90001573
TD DN (CD4-CD8-) %T cell	3427	MT_Trait553	Relative count	Maturation stages of T cell	GCST90001574
Naive CD4+ %T cell	3427	MT_Trait560	Relative count	Maturation stages of T cell	GCST90001575
Transitional %B cell	3755	N_BC_Trait3	Relative count	B cell	GCST90001576
Transitional AC	3754	N_BC_Trait4	Absolute count	B cell	GCST90001577
Transitional %lymphocyte	3754	N_BC_Trait6	Relative count	B cell	GCST90001578
CD14- CD16+ monocyte AC	3727	N_MONO_Trait501	Absolute count	Monocyte	GCST90001579
CD14+ CD16+ monocyte AC	3727	N_MONO_Trait503	Absolute count	Monocyte	GCST90001580
CD14- CD16- AC	3727	N_MONO_Trait505	Absolute count	Monocyte	GCST90001581
CD14+ CD16- monocyte AC	3727	N_MONO_Trait507	Absolute count	Monocyte	GCST90001582
Monocyte AC	3727	N_MONO_Trait513	Absolute count	Monocyte	GCST90001583
CD14- CD16+ monocyte %monocyte	3727	N_MONO_Trait514	Relative count	Monocyte	GCST90001584
CD14+ CD16+ monocyte %monocyte	3727	N_MONO_Trait515	Relative count	Monocyte	GCST90001585
CD14+ CD16- monocyte %monocyte	3727	N_MONO_Trait516	Relative count	Monocyte	GCST90001586
CD16+ monocyte %monocyte	3727	N_MONO_Trait517	Relative count	Monocyte	GCST90001587
T/B	3728	RATIO_CD3_B	Relative count	TBNK	GCST90001588
CD4/CD8br	3728	RATIO_CD4_CD8B	Relative count	TBNK	GCST90001589
CD4+ AC	3652	TB_ry_Trait512	Absolute count	TBNK	GCST90001590
CD4+ %T cell	3668	TB_ry_Trait513	Relative count	TBNK	GCST90001591
CD8br AC	3652	TB_ry_Trait515	Absolute count	TBNK	GCST90001592
CD8br %T cell	3668	TB_ry_Trait516	Relative count	TBNK	GCST90001593
DP (CD4+CD8+) AC	3652	TB_ry_Trait518	Absolute count	TBNK	GCST90001594
DP (CD4+CD8+) %T cell	3668	TB_ry_Trait519	Relative count	TBNK	GCST90001595
CD8dim AC	3652	TB_ry_Trait524	Absolute count	TBNK	GCST90001596
CD8dim %T cell	3668	TB_ry_Trait525	Relative count	TBNK	GCST90001597
DN (CD4-CD8-) AC	3652	TB_ry_Trait527	Absolute count	TBNK	GCST90001598
DN (CD4-CD8-) %T cell	3668	TB_ry_Trait528	Relative count	TBNK	GCST90001599
Leukocyte AC	3653	TB_Trait501	Absolute count	TBNK	GCST90001600
Lymphocyte AC	3653	TB_Trait507	Absolute count	TBNK	GCST90001601
Lymphocyte %leukocyte	3669	TB_Trait508	Relative count	TBNK	GCST90001602
T cell AC	3653	TB_Trait509	Absolute count	TBNK	GCST90001603
T cell %lymphocyte	3669	TB_Trait510	Relative count	TBNK	GCST90001604
T cell %leukocyte	3669	TB_Trait511	Relative count	TBNK	GCST90001605
CD4+ %leukocyte	3668	TB_Trait514	Relative count	TBNK	GCST90001606
CD8br %leukocyte	3668	TB_Trait517	Relative count	TBNK	GCST90001607
DP (CD4+CD8+) %leukocyte	3668	TB_Trait520	Relative count	TBNK	GCST90001608
CD4+ CD8dim AC	3652	TB_Trait521	Absolute count	TBNK	GCST90001609
CD4+ CD8dim %lymphocyte	3668	TB_Trait522	Relative count	TBNK	GCST90001610
CD4+ CD8dim %leukocyte	3668	TB_Trait523	Relative count	TBNK	GCST90001611
CD8dim %leukocyte	3668	TB_Trait526	Relative count	TBNK	GCST90001612
DN (CD4-CD8-) %leukocyte	3668	TB_Trait529	Relative count	TBNK	GCST90001613
CD8br and CD8dim %leukocyte	3668	TB_Trait532	Relative count	TBNK	GCST90001614
TCRgd AC	3650	TB_Trait533	Absolute count	TBNK	GCST90001615
TCRgd %T cell	3666	TB_Trait534	Relative count	TBNK	GCST90001616
TCRgd %lymphocyte	3666	TB_Trait535	Relative count	TBNK	GCST90001617
HLA DR+ T cell AC	3580	TB_Trait536	Absolute count	TBNK	GCST90001618
HLA DR+ T cell%T cell	3596	TB_Trait537	Relative count	TBNK	GCST90001619
HLA DR+ T cell%lymphocyte	3596	TB_Trait538	Relative count	TBNK	GCST90001620
NKT AC	3653	TB_Trait539	Absolute count	TBNK	GCST90001621
NKT %T cell	3669	TB_Trait540	Relative count	TBNK	GCST90001622
NKT %lymphocyte	3669	TB_Trait541	Relative count	TBNK	GCST90001623
HLA DR+ CD4+ AC	3579	TB_Trait542	Absolute count	TBNK	GCST90001624
HLA DR+ CD4+ %T cell	3595	TB_Trait543	Relative count	TBNK	GCST90001625
HLA DR+ CD4+ %lymphocyte	3595	TB_Trait544	Relative count	TBNK	GCST90001626
HLA DR+ CD8br AC	3579	TB_Trait545	Absolute count	TBNK	GCST90001627
HLA DR+ CD8br %T cell	3595	TB_Trait546	Relative count	TBNK	GCST90001628
HLA DR+ CD8br %lymphocyte	3595	TB_Trait547	Relative count	TBNK	GCST90001629
CD8br NKT AC	3652	TB_Trait548	Absolute count	TBNK	GCST90001630
CD8br NKT %T cell	3668	TB_Trait549	Relative count	TBNK	GCST90001631
CD8br NKT %lymphocyte	3668	TB_Trait550	Relative count	TBNK	GCST90001632
CD8dim NKT AC	3652	TB_Trait551	Absolute count	TBNK	GCST90001633
CD8dim NKT %T cell	3668	TB_Trait552	Relative count	TBNK	GCST90001634
CD8dim NKT %lymphocyte	3668	TB_Trait553	Relative count	TBNK	GCST90001635
DN (CD4-CD8-) NKT AC	3652	TB_Trait554	Absolute count	TBNK	GCST90001636
DN (CD4-CD8-) NKT %T cell	3668	TB_Trait555	Relative count	TBNK	GCST90001637
DN (CD4-CD8-) NKT %lymphocyte	3668	TB_Trait556	Relative count	TBNK	GCST90001638
CD3- lymphocyte AC	3653	TB_Trait560	Absolute count	TBNK	GCST90001639
CD3- lymphocyte %lymphocyte	3669	TB_Trait561	Relative count	TBNK	GCST90001640
CD3- lymphocyte %leukocyte	3669	TB_Trait562	Relative count	TBNK	GCST90001641
B cell AC	3653	TB_Trait563	Absolute count	TBNK	GCST90001642
B cell % CD3- lymphocyte	3669	TB_Trait564	Relative count	TBNK	GCST90001643
B cell %lymphocyte	3669	TB_Trait565	Relative count	TBNK	GCST90001644
NK AC	3653	TB_Trait566	Absolute count	TBNK	GCST90001645
NK %CD3- lymphocyte	3669	TB_Trait567	Relative count	TBNK	GCST90001646
NK %lymphocyte	3669	TB_Trait568	Relative count	TBNK	GCST90001647
HLA DR+ NK AC	3580	TB_Trait569	Absolute count	TBNK	GCST90001648
HLA DR+ NK %NK	3596	TB_Trait570	Relative count	TBNK	GCST90001649
HLA DR+ NK %CD3- lymphocyte	3596	TB_Trait571	Relative count	TBNK	GCST90001650
Granulocyte AC	3653	TB_Trait575	Absolute count	TBNK	GCST90001651
Granulocyte %leukocyte	3669	TB_Trait576	Relative count	TBNK	GCST90001652
CD28- DN (CD4-CD8-) %DN	3440	Treg_Trait505	Relative count	Treg	GCST90001653
CD28- DN (CD4-CD8-) AC	3408	Treg_Trait506	Absolute count	Treg	GCST90001654
CD28+ DN (CD4-CD8-) %T cell	3440	Treg_Trait507	Relative count	Treg	GCST90001655
CD28+ DN (CD4-CD8-) %DN	3440	Treg_Trait508	Relative count	Treg	GCST90001656
CD28+ DN (CD4-CD8-) AC	3408	Treg_Trait509	Absolute count	Treg	GCST90001657
CD39+ CD4+ %T cell	3440	Treg_Trait512	Relative count	Treg	GCST90001658
CD39+ CD4+ %CD4+	3440	Treg_Trait513	Relative count	Treg	GCST90001659
CD39+ CD4+ AC	3408	Treg_Trait514	Absolute count	Treg	GCST90001660
CD28- CD8dim %T cell	3440	Treg_Trait574	Relative count	Treg	GCST90001661
CD28- CD8dim %CD8dim	3440	Treg_Trait575	Relative count	Treg	GCST90001662
CD28- CD8dim AC	3408	Treg_Trait576	Absolute count	Treg	GCST90001663
CD28+ CD45RA+ CD8dim %T cell	3440	Treg_Trait577	Relative count	Treg	GCST90001664
CD28+ CD45RA+ CD8dim %CD8dim	3440	Treg_Trait578	Relative count	Treg	GCST90001665
CD28+ CD45RA+ CD8dim AC	3408	Treg_Trait579	Absolute count	Treg	GCST90001666
CD28+ CD45RA- CD8dim %T cell	3440	Treg_Trait580	Relative count	Treg	GCST90001667
CD28+ CD45RA- CD8dim %CD8dim	3440	Treg_Trait581	Relative count	Treg	GCST90001668
CD28+ CD45RA- CD8dim AC	3408	Treg_Trait582	Absolute count	Treg	GCST90001669
CD39+ CD8br %T cell	3440	Treg_Trait585	Relative count	Treg	GCST90001670
CD39+ CD8br %CD8br	3440	Treg_Trait586	Relative count	Treg	GCST90001671
CD39+ CD8br AC	3408	Treg_Trait587	Absolute count	Treg	GCST90001672
CD28- CD127- CD25++ CD8br %T cell	3162	Treg_Trait588	Relative count	Treg	GCST90001673
CD28- CD127- CD25++ CD8br %CD8br	3162	Treg_Trait589	Relative count	Treg	GCST90001674
CD28- CD127- CD25++ CD8br AC	3130	Treg_Trait590	Absolute count	Treg	GCST90001675
CD28- CD25++ CD8br %T cell	3162	Treg_Trait591	Relative count	Treg	GCST90001676
CD28- CD25++ CD8br %CD8br	3162	Treg_Trait592	Relative count	Treg	GCST90001677
CD28- CD25++ CD8br AC	3130	Treg_Trait593	Absolute count	Treg	GCST90001678
CD25++ CD8br %T cell	3162	Treg_Trait594	Relative count	Treg	GCST90001679
CD25++ CD8br %CD8br	3162	Treg_Trait595	Relative count	Treg	GCST90001680
CD25++ CD8br AC	3130	Treg_Trait596	Absolute count	Treg	GCST90001681
CD127- CD8br %T cell	3403	Treg_Trait597	Relative count	Treg	GCST90001682
CD127- CD8br %CD8br	3403	Treg_Trait598	Relative count	Treg	GCST90001683
CD127- CD8br AC	3371	Treg_Trait599	Absolute count	Treg	GCST90001684
CD28- CD8br %T cell	3440	Treg_Trait600	Relative count	Treg	GCST90001685
CD28- CD8br %CD8br	3440	Treg_Trait601	Relative count	Treg	GCST90001686
CD28- CD8br AC	3408	Treg_Trait602	Absolute count	Treg	GCST90001687
CD28+ CD45RA+ CD8br %T cell	3440	Treg_Trait603	Relative count	Treg	GCST90001688
CD28+ CD45RA+ CD8br %CD8br	3440	Treg_Trait604	Relative count	Treg	GCST90001689
CD28+ CD45RA+ CD8br AC	3408	Treg_Trait605	Absolute count	Treg	GCST90001690
CD28+ CD45RA- CD8br %T cell	3440	Treg_Trait606	Relative count	Treg	GCST90001691
CD28+ CD45RA- CD8br %CD8br	3440	Treg_Trait607	Relative count	Treg	GCST90001692
CD28+ CD45RA- CD8br AC	3408	Treg_Trait608	Absolute count	Treg	GCST90001693
CD28- DN (CD4-CD8-) %T cell	3440	Treg_Trait611	Relative count	Treg	GCST90001694
CD45RA- CD28- CD8br AC	3408	Treg_Trait700	Absolute count	Treg	GCST90001695
CD45RA- CD28- CD8br %CD8br	3425	Treg_Trait701	Relative count	Treg	GCST90001696
CD45RA- CD28- CD8br %T cell	3425	Treg_Trait702	Relative count	Treg	GCST90001697
CD45RA+ CD28- CD8br AC	3408	Treg_Trait706	Absolute count	Treg	GCST90001698
CD45RA+ CD28- CD8br %CD8br	3425	Treg_Trait707	Relative count	Treg	GCST90001699
CD45RA+ CD28- CD8br %T cell	3425	Treg_Trait708	Relative count	Treg	GCST90001700
BAFF-R on CD20- CD38-	3689	Bcells.trait111	MFI	B cell	GCST90001701
BAFF-R on CD24+ CD27+	3755	Bcells.trait112	MFI	B cell	GCST90001702
BAFF-R on IgD+ CD24+	3755	Bcells.trait137	MFI	B cell	GCST90001703
BAFF-R on IgD+ CD24-	3755	Bcells.trait138	MFI	B cell	GCST90001704
BAFF-R on IgD+ CD38-	3743	Bcells.trait139	MFI	B cell	GCST90001705
BAFF-R on IgD+ CD38- naive	1868	Bcells.trait140	MFI	B cell	GCST90001706
BAFF-R on IgD+ CD38- unsw mem	1868	Bcells.trait141	MFI	B cell	GCST90001707
BAFF-R on IgD+ CD38br	3754	Bcells.trait142	MFI	B cell	GCST90001708
BAFF-R on IgD+ CD38dim	3755	Bcells.trait143	MFI	B cell	GCST90001709
BAFF-R on IgD- CD24-	3755	Bcells.trait147	MFI	B cell	GCST90001710
BAFF-R on IgD- CD27-	3755	Bcells.trait148	MFI	B cell	GCST90001711
BAFF-R on IgD- CD38-	3755	Bcells.trait149	MFI	B cell	GCST90001712
BAFF-R on IgD- CD38br	3757	Bcells.trait150	MFI	B cell	GCST90001713
BAFF-R on IgD- CD38dim	3755	Bcells.trait151	MFI	B cell	GCST90001714
BAFF-R on memory B cell	3755	Bcells.trait154	MFI	B cell	GCST90001715
BAFF-R on naive-mature B cell	3755	Bcells.trait156	MFI	B cell	GCST90001716
BAFF-R on unsw mem	3755	Bcells.trait157	MFI	B cell	GCST90001717
BAFF-R on sw mem	3755	Bcells.trait159	MFI	B cell	GCST90001718
BAFF-R on IgD+	3756	Bcells.trait160	MFI	B cell	GCST90001719
BAFF-R on transitional	3753	Bcells.trait161	MFI	B cell	GCST90001720
CD19 on CD20-	3754	Bcells.trait255	MFI	B cell	GCST90001721
CD19 on CD20- CD38-	3692	Bcells.trait282	MFI	B cell	GCST90001722
CD19 on CD24+ CD27+	3754	Bcells.trait283	MFI	B cell	GCST90001723
CD19 on IgD+ CD24+	3754	Bcells.trait308	MFI	B cell	GCST90001724
CD19 on IgD+ CD24-	3754	Bcells.trait309	MFI	B cell	GCST90001725
CD19 on IgD+ CD38-	3743	Bcells.trait310	MFI	B cell	GCST90001726
CD19 on IgD+ CD38- naive	1861	Bcells.trait311	MFI	B cell	GCST90001727
CD19 on IgD+ CD38- unsw mem	1864	Bcells.trait312	MFI	B cell	GCST90001728
CD19 on IgD+ CD38br	3755	Bcells.trait313	MFI	B cell	GCST90001729
CD19 on IgD+ CD38dim	3755	Bcells.trait314	MFI	B cell	GCST90001730
CD19 on IgD- CD24-	3753	Bcells.trait318	MFI	B cell	GCST90001731
CD19 on IgD- CD27-	3754	Bcells.trait319	MFI	B cell	GCST90001732
CD19 on IgD- CD38-	3755	Bcells.trait320	MFI	B cell	GCST90001733
CD19 on IgD- CD38br	3756	Bcells.trait321	MFI	B cell	GCST90001734
CD19 on IgD- CD38dim	3755	Bcells.trait322	MFI	B cell	GCST90001735
CD19 on memory B cell	3755	Bcells.trait325	MFI	B cell	GCST90001736
CD19 on naive-mature B cell	3751	Bcells.trait327	MFI	B cell	GCST90001737
CD19 on unsw mem	3754	Bcells.trait328	MFI	B cell	GCST90001738
CD19 on PB/PC	3755	Bcells.trait329	MFI	B cell	GCST90001739
CD19 on sw mem	3755	Bcells.trait331	MFI	B cell	GCST90001740
CD19 on IgD+	3756	Bcells.trait332	MFI	B cell	GCST90001741
CD19 on transitional	3755	Bcells.trait333	MFI	B cell	GCST90001742
CD20 on B cell	3758	Bcells.trait335	MFI	B cell	GCST90001743
CD20 on CD20- CD38-	3703	Bcells.trait354	MFI	B cell	GCST90001744
CD20 on CD24+ CD27+	3755	Bcells.trait355	MFI	B cell	GCST90001745
CD20 on IgD+ CD24+	3755	Bcells.trait378	MFI	B cell	GCST90001746
CD20 on IgD+ CD24-	3755	Bcells.trait379	MFI	B cell	GCST90001747
CD20 on IgD+ CD38-	3743	Bcells.trait380	MFI	B cell	GCST90001748
CD20 on IgD+ CD38- naive	1865	Bcells.trait381	MFI	B cell	GCST90001749
CD20 on IgD+ CD38- unsw mem	1867	Bcells.trait382	MFI	B cell	GCST90001750
CD20 on IgD+ CD38br	3755	Bcells.trait383	MFI	B cell	GCST90001751
CD20 on IgD+ CD38dim	3755	Bcells.trait384	MFI	B cell	GCST90001752
CD20 on IgD- CD24-	3755	Bcells.trait388	MFI	B cell	GCST90001753
CD20 on IgD- CD27-	3755	Bcells.trait389	MFI	B cell	GCST90001754
CD20 on IgD- CD38-	3755	Bcells.trait390	MFI	B cell	GCST90001755
CD20 on IgD- CD38br	3757	Bcells.trait391	MFI	B cell	GCST90001756
CD20 on IgD- CD38dim	3755	Bcells.trait392	MFI	B cell	GCST90001757
CD20 on memory B cell	3755	Bcells.trait395	MFI	B cell	GCST90001758
CD20 on naive-mature B cell	3755	Bcells.trait397	MFI	B cell	GCST90001759
CD20 on unsw mem	3755	Bcells.trait398	MFI	B cell	GCST90001760
CD20 on sw mem	3755	Bcells.trait399	MFI	B cell	GCST90001761
CD20 on IgD+	3756	Bcells.trait400	MFI	B cell	GCST90001762
CD20 on transitional	3755	Bcells.trait401	MFI	B cell	GCST90001763
CD24 on CD24+ CD27+	3752	Bcells.trait418	MFI	B cell	GCST90001764
CD24 on IgD+ CD24+	3753	Bcells.trait438	MFI	B cell	GCST90001765
CD24 on IgD+ CD38-	3736	Bcells.trait439	MFI	B cell	GCST90001766
CD24 on IgD+ CD38- unsw mem	1863	Bcells.trait441	MFI	B cell	GCST90001767
CD24 on IgD+ CD38br	3753	Bcells.trait442	MFI	B cell	GCST90001768
CD24 on IgD- CD38-	3746	Bcells.trait445	MFI	B cell	GCST90001769
CD24 on IgD- CD38dim	3747	Bcells.trait446	MFI	B cell	GCST90001770
CD24 on memory B cell	3751	Bcells.trait448	MFI	B cell	GCST90001771
CD24 on unsw mem	3753	Bcells.trait449	MFI	B cell	GCST90001772
CD24 on sw mem	3750	Bcells.trait450	MFI	B cell	GCST90001773
CD24 on transitional	3754	Bcells.trait451	MFI	B cell	GCST90001774
CD25 on B cell	3758	Bcells.trait453	MFI	B cell	GCST90001775
CD25 on CD20- CD38-	3600	Bcells.trait470	MFI	B cell	GCST90001776
CD25 on CD24+ CD27+	3755	Bcells.trait471	MFI	B cell	GCST90001777
CD25 on IgD+ CD24+	3755	Bcells.trait490	MFI	B cell	GCST90001778
CD25 on IgD+ CD24-	3755	Bcells.trait491	MFI	B cell	GCST90001779
CD25 on IgD+ CD38-	3740	Bcells.trait492	MFI	B cell	GCST90001780
CD25 on IgD+ CD38- naive	1866	Bcells.trait493	MFI	B cell	GCST90001781
CD25 on IgD+ CD38- unsw mem	1868	Bcells.trait494	MFI	B cell	GCST90001782
CD25 on IgD+ CD38br	3754	Bcells.trait495	MFI	B cell	GCST90001783
CD25 on IgD+ CD38dim	3755	Bcells.trait496	MFI	B cell	GCST90001784
CD25 on IgD- CD24-	3746	Bcells.trait500	MFI	B cell	GCST90001785
CD25 on IgD- CD27-	3749	Bcells.trait501	MFI	B cell	GCST90001786
CD25 on IgD- CD38-	3755	Bcells.trait502	MFI	B cell	GCST90001787
CD25 on IgD- CD38br	3754	Bcells.trait503	MFI	B cell	GCST90001788
CD25 on IgD- CD38dim	3755	Bcells.trait504	MFI	B cell	GCST90001789
CD25 on memory B cell	3755	Bcells.trait506	MFI	B cell	GCST90001790
CD25 on naive-mature B cell	3755	Bcells.trait508	MFI	B cell	GCST90001791
CD25 on unsw mem	3755	Bcells.trait509	MFI	B cell	GCST90001792
CD25 on sw mem	3755	Bcells.trait510	MFI	B cell	GCST90001793
CD25 on IgD+	3756	Bcells.trait511	MFI	B cell	GCST90001794
CD25 on transitional	3755	Bcells.trait512	MFI	B cell	GCST90001795
CD27 on CD20-	3732	Bcells.trait514	MFI	B cell	GCST90001796
CD27 on CD20- CD38-	3689	Bcells.trait536	MFI	B cell	GCST90001797
CD27 on CD24+ CD27+	3755	Bcells.trait537	MFI	B cell	GCST90001798
CD27 on T cell	1869	Bcells.trait539	MFI	B cell	GCST90001799
CD27 on IgD+ CD24+	3754	Bcells.trait561	MFI	B cell	GCST90001800
CD27 on IgD+ CD38- unsw mem	1867	Bcells.trait563	MFI	B cell	GCST90001801
CD27 on IgD- CD38-	3755	Bcells.trait565	MFI	B cell	GCST90001802
CD27 on IgD- CD38br	3740	Bcells.trait566	MFI	B cell	GCST90001803
CD27 on IgD- CD38dim	3755	Bcells.trait567	MFI	B cell	GCST90001804
CD27 on memory B cell	3755	Bcells.trait570	MFI	B cell	GCST90001805
CD27 on unsw mem	3754	Bcells.trait571	MFI	B cell	GCST90001806
CD27 on PB/PC	3749	Bcells.trait572	MFI	B cell	GCST90001807
CD27 on sw mem	3755	Bcells.trait574	MFI	B cell	GCST90001808
CD38 on CD20-	3728	Bcells.trait597	MFI	B cell	GCST90001809
CD38 on CD3- CD19-	1865	Bcells.trait619	MFI	B cell	GCST90001810
CD38 on IgD+ CD24-	3754	Bcells.trait637	MFI	B cell	GCST90001811
CD38 on IgD+ CD38br	3750	Bcells.trait640	MFI	B cell	GCST90001812
CD38 on IgD+ CD38dim	3752	Bcells.trait641	MFI	B cell	GCST90001813
CD38 on IgD- CD38br	3742	Bcells.trait643	MFI	B cell	GCST90001814
CD38 on IgD- CD38dim	3755	Bcells.trait644	MFI	B cell	GCST90001815
CD38 on naive-mature B cell	3754	Bcells.trait646	MFI	B cell	GCST90001816
CD38 on PB/PC	3753	Bcells.trait647	MFI	B cell	GCST90001817
CD38 on IgD+	3756	Bcells.trait649	MFI	B cell	GCST90001818
CD38 on transitional	3755	Bcells.trait650	MFI	B cell	GCST90001819
IgD on IgD+ CD24+	3754	Bcells.trait775	MFI	B cell	GCST90001820
IgD on IgD+ CD24-	3754	Bcells.trait776	MFI	B cell	GCST90001821
IgD on IgD+ CD38-	3740	Bcells.trait777	MFI	B cell	GCST90001822
IgD on IgD+ CD38- unsw mem	1865	Bcells.trait779	MFI	B cell	GCST90001823
IgD on IgD+ CD38br	3754	Bcells.trait780	MFI	B cell	GCST90001824
IgD on IgD+ CD38dim	3754	Bcells.trait781	MFI	B cell	GCST90001825
IgD on unsw mem	3731	Bcells.trait785	MFI	B cell	GCST90001826
IgD on IgD+	3755	Bcells.trait786	MFI	B cell	GCST90001827
IgD on transitional	3755	Bcells.trait787	MFI	B cell	GCST90001828
BAFF-R on B cell	3758	Bcells.trait84	MFI	B cell	GCST90001829
BAFF-R on CD20-	3746	Bcells.trait85	MFI	B cell	GCST90001830
CD62L on CD62L+ myeloid DC	2872	Blue.530.30.cDC.trait1	MFI	cDC	GCST90001831
CD62L on CD62L+ plasmacytoid DC	2872	Blue.530.30.cDC.trait2	MFI	cDC	GCST90001832
CD62L on CD62L+ DC	2871	Blue.530.30.cDC.trait3	MFI	cDC	GCST90001833
CD62L on monocyte	2848	Blue.530.30.cDC.trait4	MFI	cDC	GCST90001834
CD62L on granulocyte	2849	Blue.530.30.cDC.trait5	MFI	cDC	GCST90001835
CD66b on CD66b++ myeloid cell	1465	Blue.530.30.MDSC.trait1	MFI	Myeloid cell	GCST90001836
CD66b on Gr MDSC	1244	Blue.530.30.MDSC.trait2	MFI	Myeloid cell	GCST90001837
CD3 on naive CD8br	2910	Blue.530.30.MT.trait10	MFI	Maturation stages of T cell	GCST90001838
CD3 on EM CD8br	2912	Blue.530.30.MT.trait11	MFI	Maturation stages of T cell	GCST90001839
CD3 on TD CD8br	2911	Blue.530.30.MT.trait12	MFI	Maturation stages of T cell	GCST90001840
CD3 on CM CD4+	2912	Blue.530.30.MT.trait3	MFI	Maturation stages of T cell	GCST90001841
CD3 on Naive CD4+	2910	Blue.530.30.MT.trait4	MFI	Maturation stages of T cell	GCST90001842
CD3 on EM CD4+	2912	Blue.530.30.MT.trait5	MFI	Maturation stages of T cell	GCST90001843
CD3 on TD CD4+	2903	Blue.530.30.MT.trait6	MFI	Maturation stages of T cell	GCST90001844
CD3 on CD45RA- CD4+	2911	Blue.530.30.MT.trait7	MFI	Maturation stages of T cell	GCST90001845
CD3 on CM CD8br	2910	Blue.530.30.MT.trait9	MFI	Maturation stages of T cell	GCST90001846
CD3 on HLA DR+ T cell	3060	Blue.530.30.TBNK.trait4	MFI	TBNK	GCST90001847
CD3 on NKT	3113	Blue.530.30.TBNK.trait5	MFI	TBNK	GCST90001848
CD3 on HLA DR+ CD4+	3060	Blue.530.30.TBNK.trait6	MFI	TBNK	GCST90001849
CD3 on HLA DR+ CD8br	3060	Blue.530.30.TBNK.trait7	MFI	TBNK	GCST90001850
CD3 on T cell	2919	Blue.530.30.Treg.trait1	MFI	Treg	GCST90001851
CD3 on CD39+ resting Treg	2649	Blue.530.30.Treg.trait10	MFI	Treg	GCST90001852
CD3 on activated Treg	2919	Blue.530.30.Treg.trait11	MFI	Treg	GCST90001853
CD3 on CD39+ activated Treg	2919	Blue.530.30.Treg.trait12	MFI	Treg	GCST90001854
CD3 on secreting Treg	2919	Blue.530.30.Treg.trait13	MFI	Treg	GCST90001855
CD3 on CD39+ secreting Treg	2919	Blue.530.30.Treg.trait14	MFI	Treg	GCST90001856
CD3 on activated & secreting Treg	2919	Blue.530.30.Treg.trait15	MFI	Treg	GCST90001857
CD3 on CD45RA+ CD4+	2919	Blue.530.30.Treg.trait17	MFI	Treg	GCST90001858
CD3 on CD8br	2918	Blue.530.30.Treg.trait2	MFI	Treg	GCST90001859
CD3 on CD39+ CD4+	2919	Blue.530.30.Treg.trait21	MFI	Treg	GCST90001860
CD3 on CD28+ CD4+	2919	Blue.530.30.Treg.trait22	MFI	Treg	GCST90001861
CD3 on CD28+ DN (CD4-CD8-)	2918	Blue.530.30.Treg.trait23	MFI	Treg	GCST90001862
CD3 on CD28+ CD45RA- CD8br	2919	Blue.530.30.Treg.trait3	MFI	Treg	GCST90001863
CD3 on CD28+ CD45RA+ CD8br	2919	Blue.530.30.Treg.trait4	MFI	Treg	GCST90001864
CD3 on CD28- CD8br	2919	Blue.530.30.Treg.trait5	MFI	Treg	GCST90001865
CD3 on CD39+ CD8br	2914	Blue.530.30.Treg.trait6	MFI	Treg	GCST90001866
CD3 on CD4+	2919	Blue.530.30.Treg.trait7	MFI	Treg	GCST90001867
CD3 on CD4 Treg	2919	Blue.530.30.Treg.trait8	MFI	Treg	GCST90001868
CD3 on resting Treg	2918	Blue.530.30.Treg.trait9	MFI	Treg	GCST90001869
CD34 on HSC	1634	Blue.585.42.MDSC.trait1	MFI	Myeloid cell	GCST90001870
HVEM on T cell	1247	HVEM1000_150630.trait1	MFI	Maturation stages of T cell	GCST90001871
HVEM on naive CD8br	1247	HVEM1000_150630.trait10	MFI	Maturation stages of T cell	GCST90001872
HVEM on EM CD8br	1247	HVEM1000_150630.trait11	MFI	Maturation stages of T cell	GCST90001873
HVEM on TD CD8br	1247	HVEM1000_150630.trait12	MFI	Maturation stages of T cell	GCST90001874
HVEM on CD4+	1247	HVEM1000_150630.trait2	MFI	Maturation stages of T cell	GCST90001875
HVEM on CM CD4+	1247	HVEM1000_150630.trait3	MFI	Maturation stages of T cell	GCST90001876
HVEM on naive CD4+	1247	HVEM1000_150630.trait4	MFI	Maturation stages of T cell	GCST90001877
HVEM on EM CD4+	1247	HVEM1000_150630.trait5	MFI	Maturation stages of T cell	GCST90001878
HVEM on TD CD4+	1245	HVEM1000_150630.trait6	MFI	Maturation stages of T cell	GCST90001879
HVEM on CD45RA- CD4+	1247	HVEM1000_150630.trait7	MFI	Maturation stages of T cell	GCST90001880
HVEM on CD8br	1247	HVEM1000_150630.trait8	MFI	Maturation stages of T cell	GCST90001881
HVEM on CM CD8br	1247	HVEM1000_150630.trait9	MFI	Maturation stages of T cell	GCST90001882
CD16-CD56 on NKT	3113	Blue.585.42.TBNK.trait1	MFI	TBNK	GCST90001883
CD16-CD56 on NK	3113	Blue.585.42.TBNK.trait2	MFI	TBNK	GCST90001884
CD16-CD56 on HLA DR+ NK	2971	Blue.585.42.TBNK.trait3	MFI	TBNK	GCST90001885
CD28 on CD39+ activated Treg	2920	Blue.585.42.Treg.trait10	MFI	Treg	GCST90001886
CD28 on secreting Treg	2920	Blue.585.42.Treg.trait11	MFI	Treg	GCST90001887
CD28 on CD39+ secreting Treg	2920	Blue.585.42.Treg.trait12	MFI	Treg	GCST90001888
CD28 on activated & secreting Treg	2920	Blue.585.42.Treg.trait13	MFI	Treg	GCST90001889
CD28 on CD45RA+ CD4+	2920	Blue.585.42.Treg.trait15	MFI	Treg	GCST90001890
CD28 on CD45RA- CD4 not Treg	2920	Blue.585.42.Treg.trait18	MFI	Treg	GCST90001891
CD28 on CD39+ CD4+	2920	Blue.585.42.Treg.trait19	MFI	Treg	GCST90001892
CD28 on CD28+ CD45RA- CD8br	2920	Blue.585.42.Treg.trait2	MFI	Treg	GCST90001893
CD28 on CD28+ CD4+	2920	Blue.585.42.Treg.trait20	MFI	Treg	GCST90001894
CD28 on CD28+ DN (CD4-CD8-)	2919	Blue.585.42.Treg.trait21	MFI	Treg	GCST90001895
CD28 on CD28+ CD45RA+ CD8br	2920	Blue.585.42.Treg.trait3	MFI	Treg	GCST90001896
CD28 on CD39+ CD8br	2914	Blue.585.42.Treg.trait4	MFI	Treg	GCST90001897
CD28 on CD4+	2920	Blue.585.42.Treg.trait5	MFI	Treg	GCST90001898
CD28 on CD4 Treg	2920	Blue.585.42.Treg.trait6	MFI	Treg	GCST90001899
CD28 on resting Treg	2919	Blue.585.42.Treg.trait7	MFI	Treg	GCST90001900
CD28 on CD39+ resting Treg	2650	Blue.585.42.Treg.trait8	MFI	Treg	GCST90001901
CD28 on activated Treg	2920	Blue.585.42.Treg.trait9	MFI	Treg	GCST90001902
CD86 on myeloid DC	2871	Blue.670.LP.cDC.trait1	MFI	cDC	GCST90001903
CD86 on CD62L+ myeloid DC	2871	Blue.670.LP.cDC.trait2	MFI	cDC	GCST90001904
CD86 on monocyte	2850	Blue.670.LP.cDC.trait3	MFI	cDC	GCST90001905
CD86 on granulocyte	2848	Blue.670.LP.cDC.trait4	MFI	cDC	GCST90001906
CCR7 on naive CD4+	2910	Blue.670.LP.MT.trait1	MFI	Maturation stages of T cell	GCST90001907
CCR7 on naive CD8br	2910	Blue.670.LP.MT.trait3	MFI	Maturation stages of T cell	GCST90001908
CD45 on CD14+ monocyte	3112	Blue.670.LP.TBNK.trait1	MFI	TBNK	GCST90001909
CD45 on B cell	3112	Blue.670.LP.TBNK.trait10	MFI	TBNK	GCST90001910
CD45 on NK	3113	Blue.670.LP.TBNK.trait11	MFI	TBNK	GCST90001911
CD45 on HLA DR+ NK	2971	Blue.670.LP.TBNK.trait12	MFI	TBNK	GCST90001912
CD45 on granulocyte	3112	Blue.670.LP.TBNK.trait13	MFI	TBNK	GCST90001913
CD45 on lymphocyte	3113	Blue.670.LP.TBNK.trait2	MFI	TBNK	GCST90001914
CD45 on T cell	3113	Blue.670.LP.TBNK.trait3	MFI	TBNK	GCST90001915
CD45 on CD4+	3113	Blue.670.LP.TBNK.trait4	MFI	TBNK	GCST90001916
CD45 on CD8br	3113	Blue.670.LP.TBNK.trait5	MFI	TBNK	GCST90001917
CD45 on HLA DR+ T cell	3060	Blue.670.LP.TBNK.trait6	MFI	TBNK	GCST90001918
CD45 on NKT	3113	Blue.670.LP.TBNK.trait7	MFI	TBNK	GCST90001919
CD45 on HLA DR+ CD4+	3060	Blue.670.LP.TBNK.trait8	MFI	TBNK	GCST90001920
CD45 on HLA DR+ CD8br	3060	Blue.670.LP.TBNK.trait9	MFI	TBNK	GCST90001921
CD127 on T cell	2920	Blue.670.LP.Treg.trait1	MFI	Treg	GCST90001922
CD127 on CD45RA- CD4 not Treg	2920	Blue.670.LP.Treg.trait10	MFI	Treg	GCST90001923
CD127 on CD28+ CD4+	2920	Blue.670.LP.Treg.trait11	MFI	Treg	GCST90001924
CD127 on CD28+ DN (CD4-CD8-)	2918	Blue.670.LP.Treg.trait12	MFI	Treg	GCST90001925
CD127 on granulocyte	2920	Blue.670.LP.Treg.trait13	MFI	Treg	GCST90001926
CD127 on CD8br	2920	Blue.670.LP.Treg.trait2	MFI	Treg	GCST90001927
CD127 on CD28+ CD45RA- CD8br	2920	Blue.670.LP.Treg.trait3	MFI	Treg	GCST90001928
CD127 on CD28+ CD45RA+ CD8br	2920	Blue.670.LP.Treg.trait4	MFI	Treg	GCST90001929
CD127 on CD28- CD8br	2920	Blue.670.LP.Treg.trait5	MFI	Treg	GCST90001930
CD127 on CD4+	2920	Blue.670.LP.Treg.trait6	MFI	Treg	GCST90001931
CD127 on CD45RA+ CD4+	2920	Blue.670.LP.Treg.trait7	MFI	Treg	GCST90001932
CD25 on CD45RA- CD4 not Treg	3575	Blue.780.60.CD25.trait1	MFI	Treg	GCST90001933
CD25 on CD45RA+ CD4 not Treg	3575	Blue.780.60.CD25.trait13	MFI	Treg	GCST90001934
CD25 on CD39+ CD4 Treg	3575	Blue.780.60.CD25.trait10	MFI	Treg	GCST90001935
CD25 on CD4 Treg	3575	Blue.780.60.CD25.trait2	MFI	Treg	GCST90001936
CD25 on resting Treg	3246	Blue.780.60.CD25.trait3	MFI	Treg	GCST90001937
CD25 on CD39+ resting Treg	3574	Blue.780.60.CD25.trait4	MFI	Treg	GCST90001938
CD25 on activated Treg	3574	Blue.780.60.CD25.trait5	MFI	Treg	GCST90001939
CD25 on CD39+ activated Treg	3574	Blue.780.60.CD25.trait6	MFI	Treg	GCST90001940
CD25 on secreting Treg	3574	Blue.780.60.CD25.trait7	MFI	Treg	GCST90001941
CD25 on CD39+ secreting Treg	3574	Blue.780.60.CD25.trait8	MFI	Treg	GCST90001942
CD25 on activated & secreting Treg	3574	Blue.780.60.CD25.trait9	MFI	Treg	GCST90001943
CD123 on plasmacytoid DC	2872	Blue.780.60.cDC.trait1	MFI	cDC	GCST90001944
CD123 on CD62L+ plasmacytoid DC	2872	Blue.780.60.cDC.trait2	MFI	cDC	GCST90001945
CD33 on CD14+ monocyte	1634	Blue.780.60.MDSC.trait1	MFI	Myeloid cell	GCST90001946
CD33 on CD33br HLA DR+ CD14dim	1577	Blue.780.60.MDSC.trait10	MFI	Myeloid cell	GCST90001947
CD33 on CD33dim HLA DR+ CD11b+	1633	Blue.780.60.MDSC.trait12	MFI	Myeloid cell	GCST90001948
CD33 on CD33dim HLA DR+ CD11b-	1634	Blue.780.60.MDSC.trait13	MFI	Myeloid cell	GCST90001949
CD33 on Gr MDSC	1244	Blue.780.60.MDSC.trait14	MFI	Myeloid cell	GCST90001950
CD33 on CD66b++ myeloid cell	1464	Blue.780.60.MDSC.trait2	MFI	Myeloid cell	GCST90001951
CD33 on Mo MDSC	1569	Blue.780.60.MDSC.trait3	MFI	Myeloid cell	GCST90001952
CD33 on CD33dim HLA DR-	1558	Blue.780.60.MDSC.trait4	MFI	Myeloid cell	GCST90001953
CD33 on basophil	1555	Blue.780.60.MDSC.trait6	MFI	Myeloid cell	GCST90001954
CD33 on Im MDSC	1554	Blue.780.60.MDSC.trait7	MFI	Myeloid cell	GCST90001955
CD33 on CD33br HLA DR+	1579	Blue.780.60.MDSC.trait8	MFI	Myeloid cell	GCST90001956
CD33 on CD33br HLA DR+ CD14-	1578	Blue.780.60.MDSC.trait9	MFI	Myeloid cell	GCST90001957
CD4 on monocyte	3112	Blue.780.60.TBNK.trait1	MFI	TBNK	GCST90001958
CD4 on HLA DR+ CD4+	3060	Blue.780.60.TBNK.trait3	MFI	TBNK	GCST90001959
CD25 on CD4+	2920	Blue.780.60.Treg.trait4	MFI	Treg	GCST90001960
CD25 on CD39+ CD4+	2920	Blue.780.60.Treg.trait5	MFI	Treg	GCST90001961
CD25 on CD28+ CD4+	2920	Blue.780.60.Treg.trait6	MFI	Treg	GCST90001962
FSC-A on myeloid DC	2872	FSC.cDC.trait2	Morphological parameter	cDC	GCST90001963
FSC-A on plasmacytoid DC	2872	FSC.cDC.trait3	Morphological parameter	cDC	GCST90001964
FSC-A on monocyte	2850	FSC.cDC.trait4	Morphological parameter	cDC	GCST90001965
FSC-A on granulocyte	2850	FSC.cDC.trait5	Morphological parameter	cDC	GCST90001966
FSC-A on CD14+ monocyte	3112	FSC.TBNK.trait1	Morphological parameter	TBNK	GCST90001967
FSC-A on B cell	3112	FSC.TBNK.trait10	Morphological parameter	TBNK	GCST90001968
FSC-A on NK	3113	FSC.TBNK.trait11	Morphological parameter	TBNK	GCST90001969
FSC-A on HLA DR+ NK	2971	FSC.TBNK.trait12	Morphological parameter	TBNK	GCST90001970
FSC-A on lymphocyte	3113	FSC.TBNK.trait2	Morphological parameter	TBNK	GCST90001971
FSC-A on T cell	3113	FSC.TBNK.trait3	Morphological parameter	TBNK	GCST90001972
FSC-A on CD4+	3113	FSC.TBNK.trait4	Morphological parameter	TBNK	GCST90001973
FSC-A on CD8br	3113	FSC.TBNK.trait5	Morphological parameter	TBNK	GCST90001974
FSC-A on HLA DR+ T cell	3060	FSC.TBNK.trait6	Morphological parameter	TBNK	GCST90001975
FSC-A on NKT	3113	FSC.TBNK.trait7	Morphological parameter	TBNK	GCST90001976
FSC-A on HLA DR+ CD4+	3060	FSC.TBNK.trait8	Morphological parameter	TBNK	GCST90001977
FSC-A on HLA DR+ CD8br	3060	FSC.TBNK.trait9	Morphological parameter	TBNK	GCST90001978
CD16 on CD14- CD16+ monocyte	3717	mono.trait1	MFI	Monocyte	GCST90001979
CD40 on CD14+ CD16- monocyte	3727	mono.trait10	MFI	Monocyte	GCST90001980
CD40 on CD14+ CD16+ monocyte	3716	mono.trait11	MFI	Monocyte	GCST90001981
CCR2 on CD14- CD16+ monocyte	3719	mono.trait12	MFI	Monocyte	GCST90001982
CD14 on CD14+ CD16+ monocyte	3727	mono.trait14	MFI	Monocyte	GCST90001983
HLA DR on CD14- CD16+ monocyte	3719	mono.trait16	MFI	Monocyte	GCST90001984
CD40 on monocytes	3727	mono.trait17	MFI	Monocyte	GCST90001985
CD14 on CD14+ CD16- monocyte	3727	mono.trait19	MFI	Monocyte	GCST90001986
CD64 on CD14+ CD16- monocyte	3720	mono.trait2	MFI	Monocyte	GCST90001987
HLA DR on CD14+ CD16- monocyte	3727	mono.trait21	MFI	Monocyte	GCST90001988
CD40 on CD14- CD16+ monocyte	3719	mono.trait22	MFI	Monocyte	GCST90001989
CD64 on CD14- CD16+ monocyte	3712	mono.trait24	MFI	Monocyte	GCST90001990
HLA DR on CD14+ monocyte	3727	mono.trait25	MFI	Monocyte	GCST90001991
CCR2 on CD14+ CD16+ monocyte	3716	mono.trait28	MFI	Monocyte	GCST90001992
PDL-1 on CD14+ CD16- monocyte	3727	mono.trait29	MFI	Monocyte	GCST90001993
CX3CR1 on CD14- CD16-	3687	mono.trait3	MFI	Monocyte	GCST90001994
CX3CR1 on monocyte	3687	mono.trait33	MFI	Monocyte	GCST90001995
CX3CR1 on CD14+ CD16+ monocyte	3676	mono.trait35	MFI	Monocyte	GCST90001996
CX3CR1 on CD14+ CD16- monocyte	3687	mono.trait36	MFI	Monocyte	GCST90001997
PDL-1 on CD14+ CD16+ monocyte	3716	mono.trait39	MFI	Monocyte	GCST90001998
PDL-1 on CD14- CD16+ monocyte	3719	mono.trait4	MFI	Monocyte	GCST90001999
PDL-1 on CD14- CD16-	3727	mono.trait41	MFI	Monocyte	GCST90002000
CD64 on CD14- CD16-	3720	mono.trait42	MFI	Monocyte	GCST90002001
PDL-1 on monocyte	3727	mono.trait43	MFI	Monocyte	GCST90002002
CCR2 on CD14- CD16-	3727	mono.trait44	MFI	Monocyte	GCST90002003
CCR2 on CD14+ CD16- monocyte	3727	mono.trait46	MFI	Monocyte	GCST90002004
CD16 on CD14+ CD16+ monocyte	3714	mono.trait47	MFI	Monocyte	GCST90002005
CD64 on monocyte	3720	mono.trait48	MFI	Monocyte	GCST90002006
HLA DR on CD14+ CD16+ monocyte	3716	mono.trait50	MFI	Monocyte	GCST90002007
CCR2 on monocyte	3727	mono.trait52	MFI	Monocyte	GCST90002008
HLA DR on CD14- CD16-	3727	mono.trait53	MFI	Monocyte	GCST90002009
HLA DR on monocyte	3727	mono.trait54	MFI	Monocyte	GCST90002010
CD64 on CD14+ CD16+ monocyte	3709	mono.trait6	MFI	Monocyte	GCST90002011
CX3CR1 on CD14- CD16+ monocyte	3679	mono.trait7	MFI	Monocyte	GCST90002012
CCR2 on myeloid DC	2870	Red.660.20.cDC.trait1	MFI	cDC	GCST90002013
CCR2 on CD62L+ myeloid DC	2870	Red.660.20.cDC.trait2	MFI	cDC	GCST90002014
CCR2 on plasmacytoid DC	2871	Red.660.20.cDC.trait3	MFI	cDC	GCST90002015
CCR2 on CD62L+ plasmacytoid DC	2871	Red.660.20.cDC.trait4	MFI	cDC	GCST90002016
CCR2 on monocyte	2850	Red.660.20.cDC.trait5	MFI	cDC	GCST90002017
CCR2 on granulocyte	2850	Red.660.20.cDC.trait6	MFI	cDC	GCST90002018
CD14 on Mo MDSC	1570	Red.660.20.MDSC.trait2	MFI	Myeloid cell	GCST90002019
CD14 on CD33br HLA DR+ CD14dim	1578	Red.660.20.MDSC.trait3	MFI	Myeloid cell	GCST90002020
CD14 on CD33dim HLA DR+ CD11b+	1634	Red.660.20.MDSC.trait4	MFI	Myeloid cell	GCST90002021
CD4 on CD4+	2912	Red.660.20.MT.trait1	MFI	Maturation stages of T cell	GCST90002022
CD4 on CM CD4 +	2912	Red.660.20.MT.trait2	MFI	Maturation stages of T cell	GCST90002023
CD4 on naive CD4+	2910	Red.660.20.MT.trait3	MFI	Maturation stages of T cell	GCST90002024
CD4 on EM CD4+	2912	Red.660.20.MT.trait4	MFI	Maturation stages of T cell	GCST90002025
CD4 on TD CD4+	2903	Red.660.20.MT.trait5	MFI	Maturation stages of T cell	GCST90002026
CD4 on CD45RA+ CD4+	2911	Red.660.20.MT.trait6	MFI	Maturation stages of T cell	GCST90002027
CD19 on B cell	3112	Red.660.20.TBNK.trait2	MFI	TBNK	GCST90002028
CD39 on CD39+ CD8br	2915	Red.660.20.Treg.trait1	MFI	Treg	GCST90002029
CD39 on CD39+ activated Treg	2920	Red.660.20.Treg.trait2	MFI	Treg	GCST90002030
CD39 on CD39+ secreting Treg	2920	Red.660.20.Treg.trait3	MFI	Treg	GCST90002031
CD39 on CD39+ CD4+	2920	Red.660.20.Treg.trait5	MFI	Treg	GCST90002032
CD39 on granulocyte	2920	Red.660.20.Treg.trait6	MFI	Treg	GCST90002033
CD39 on monocyte	2909	Red.660.20.Treg.trait7	MFI	Treg	GCST90002034
CD80 on myeloid DC	2871	Red.780.60.cDC.trait1	MFI	cDC	GCST90002035
CD80 on CD62L+ myeloid DC	2871	Red.780.60.cDC.trait2	MFI	cDC	GCST90002036
CD80 on plasmacytoid DC	2871	Red.780.60.cDC.trait3	MFI	cDC	GCST90002037
CD80 on CD62L+ plasmacytoid DC	2871	Red.780.60.cDC.trait4	MFI	cDC	GCST90002038
CD80 on monocyte	2850	Red.780.60.cDC.trait5	MFI	cDC	GCST90002039
CD80 on granulocyte	2850	Red.780.60.cDC.trait6	MFI	cDC	GCST90002040
CD45 on lymphocyte	1635	Red.780.60.MDSC.trait1	MFI	Myeloid cell	GCST90002041
CD45 on CD33br HLA DR+ CD14-	1579	Red.780.60.MDSC.trait10	MFI	Myeloid cell	GCST90002042
CD45 on CD33br HLA DR+ CD14dim	1578	Red.780.60.MDSC.trait11	MFI	Myeloid cell	GCST90002043
CD45 on CD33dim HLA DR+ CD11b-	1635	Red.780.60.MDSC.trait13	MFI	Myeloid cell	GCST90002044
CD45 on CD33- HLA DR-	1635	Red.780.60.MDSC.trait14	MFI	Myeloid cell	GCST90002045
CD45 on CD33- HLA DR+	1635	Red.780.60.MDSC.trait15	MFI	Myeloid cell	GCST90002046
CD45 on Gr MDSC	1244	Red.780.60.MDSC.trait16	MFI	Myeloid cell	GCST90002047
CD45 on CD66b++ myelod cell	1465	Red.780.60.MDSC.trait3	MFI	Myeloid cell	GCST90002048
CD45 on Mo MDSC	1570	Red.780.60.MDSC.trait4	MFI	Myeloid cell	GCST90002049
CD45 on CD33dim HLA DR-	1559	Red.780.60.MDSC.trait5	MFI	Myeloid cell	GCST90002050
CD45 on basophil	1556	Red.780.60.MDSC.trait7	MFI	Myeloid cell	GCST90002051
CD45 on Im MDSC	1555	Red.780.60.MDSC.trait8	MFI	Myeloid cell	GCST90002052
CD45 on CD33br HLA DR+	1580	Red.780.60.MDSC.trait9	MFI	Myeloid cell	GCST90002053
CD8 on CM CD8br	2910	Red.780.60.MT.trait2	MFI	Maturation stages of T cell	GCST90002054
CD8 on naive CD8br	2910	Red.780.60.MT.trait3	MFI	Maturation stages of T cell	GCST90002055
CD8 on EM CD8br	2912	Red.780.60.MT.trait4	MFI	Maturation stages of T cell	GCST90002056
CD8 on TD CD8br	2911	Red.780.60.MT.trait5	MFI	Maturation stages of T cell	GCST90002057
CD8 on CD8br	3113	Red.780.60.TBNK.trait1	MFI	TBNK	GCST90002058
CD8 on NKT	3103	Red.780.60.TBNK.trait2	MFI	TBNK	GCST90002059
CD8 on HLA DR+ CD8br	3060	Red.780.60.TBNK.trait3	MFI	TBNK	GCST90002060
CD4 on CD39+ CD4+	2920	Red.780.60.Treg.trait15	MFI	Treg	GCST90002061
CD4 on CD28+ CD4+	2920	Red.780.60.Treg.trait16	MFI	Treg	GCST90002062
CD4 on CD4 Treg	2920	Red.780.60.Treg.trait2	MFI	Treg	GCST90002063
CD4 on resting Treg	2919	Red.780.60.Treg.trait3	MFI	Treg	GCST90002064
CD4 on CD39+ resting Treg	2650	Red.780.60.Treg.trait4	MFI	Treg	GCST90002065
CD4 on activated Treg	2920	Red.780.60.Treg.trait5	MFI	Treg	GCST90002066
CD4 on CD39+ activated Treg	2920	Red.780.60.Treg.trait6	MFI	Treg	GCST90002067
CD4 on secreting Treg	2920	Red.780.60.Treg.trait7	MFI	Treg	GCST90002068
CD4 on CD39+ secreting Treg	2920	Red.780.60.Treg.trait8	MFI	Treg	GCST90002069
CD4 on activated & secreting Treg	2920	Red.780.60.Treg.trait9	MFI	Treg	GCST90002070
SSC-A on myeloid DC	2872	SSC.cDC.trait2	Morphological parameter	cDC	GCST90002071
SSC-A on plasmacytoid DC	2872	SSC.cDC.trait3	Morphological parameter	cDC	GCST90002072
SSC-A on monocyte	2850	SSC.cDC.trait4	Morphological parameter	cDC	GCST90002073
SSC-A on CD14+ monocyte	3112	SSC.TBNK.trait1	Morphological parameter	TBNK	GCST90002074
SSC-A on B cell	3112	SSC.TBNK.trait10	Morphological parameter	TBNK	GCST90002075
SSC-A on NK	3113	SSC.TBNK.trait11	Morphological parameter	TBNK	GCST90002076
SSC-A on HLA DR+ NK	2971	SSC.TBNK.trait12	Morphological parameter	TBNK	GCST90002077
SSC-A on granulocyte	3112	SSC.TBNK.trait13	Morphological parameter	TBNK	GCST90002078
SSC-A on lymphocyte	3113	SSC.TBNK.trait2	Morphological parameter	TBNK	GCST90002079
SSC-A on T cell	3113	SSC.TBNK.trait3	Morphological parameter	TBNK	GCST90002080
SSC-A on CD4+	3113	SSC.TBNK.trait4	Morphological parameter	TBNK	GCST90002081
SSC-A on CD8br	3113	SSC.TBNK.trait5	Morphological parameter	TBNK	GCST90002082
SSC-A on HLA DR+ T cell	3060	SSC.TBNK.trait6	Morphological parameter	TBNK	GCST90002083
SSC-A on NKT	3113	SSC.TBNK.trait7	Morphological parameter	TBNK	GCST90002084
SSC-A on HLA DR+ CD4+	3060	SSC.TBNK.trait8	Morphological parameter	TBNK	GCST90002085
SSC-A on HLA DR+ CD8br	3060	SSC.TBNK.trait9	Morphological parameter	TBNK	GCST90002086
CD11c on myeloid DC	2872	Violet.450.50.cDC.trait1	MFI	cDC	GCST90002087
CD11c on CD62L+ myeloid DC	2872	Violet.450.50.cDC.trait2	MFI	cDC	GCST90002088
CD11c on monocyte	2850	Violet.450.50.cDC.trait3	MFI	cDC	GCST90002089
CD11c on granulocyte	2850	Violet.450.50.cDC.trait4	MFI	cDC	GCST90002090
CD11b on CD14+ monocyte	1635	Violet.450.50.MDSC.trait1	MFI	Myeloid cell	GCST90002091
CD11b on Gr MDSC	1244	Violet.450.50.MDSC.trait13	MFI	Myeloid cell	GCST90002092
CD11b on CD66b++ myeloid cell	1465	Violet.450.50.MDSC.trait2	MFI	Myeloid cell	GCST90002093
CD11b on Mo MDSC	1570	Violet.450.50.MDSC.trait3	MFI	Myeloid cell	GCST90002094
CD11b on CD33dim HLA DR-	1559	Violet.450.50.MDSC.trait4	MFI	Myeloid cell	GCST90002095
CD11b on basophil	1556	Violet.450.50.MDSC.trait6	MFI	Myeloid cell	GCST90002096
CD11b on CD33br HLA DR+ CD14dim	1578	Violet.450.50.MDSC.trait9	MFI	Myeloid cell	GCST90002097
CD45RA on naive CD4+	2910	Violet.450.50.MT.trait1	MFI	Maturation stages of T cell	GCST90002098
CD4RA on TD CD4+	2903	Violet.450.50.MT.trait2	MFI	Maturation stages of T cell	GCST90002099
CD45RA on naive CD8br	2910	Violet.450.50.MT.trait3	MFI	Maturation stages of T cell	GCST90002100
CD45RA on TD CD8br	2911	Violet.450.50.MT.trait4	MFI	Maturation stages of T cell	GCST90002101
CD45RA on resting Treg	2919	Violet.450.50.Treg.trait2	MFI	Treg	GCST90002102
CD45RA on CD39+ resting Treg	2650	Violet.450.50.Treg.trait3	MFI	Treg	GCST90002103
HLA DR on myeloid DC	2872	Violet.510.50.cDC.trait2	MFI	cDC	GCST90002104
HLA DR on plasmacytoid DC	2872	Violet.510.50.cDC.trait3	MFI	cDC	GCST90002105
HLA DR on DC	2871	Violet.510.50.cDC.trait4	MFI	cDC	GCST90002106
HLA DR on HSC	1634	Violet.510.50.MDSC.trait1	MFI	Myeloid cell	GCST90002107
HLA DR on CD33br HLA DR+ CD14-	1579	Violet.510.50.MDSC.trait3	MFI	Myeloid cell	GCST90002108
HLA DR on CD33br HLA DR+ CD14dim	1578	Violet.510.50.MDSC.trait4	MFI	Myeloid cell	GCST90002109
HLA DR on CD33dim HLA DR+ CD11b+	1634	Violet.510.50.MDSC.trait5	MFI	Myeloid cell	GCST90002110
HLA DR on CD33dim HLA DR+ CD11b-	1635	Violet.510.50.MDSC.trait6	MFI	Myeloid cell	GCST90002111
HLA DR on CD33- HLA DR+	1635	Violet.510.50.MDSC.trait7	MFI	Myeloid cell	GCST90002112
HLA DR on HLA DR+ T cell	3060	Violet.510.50.TBNK.trait2	MFI	TBNK	GCST90002113
HLA DR on HLA DR+ CD4+	3060	Violet.510.50.TBNK.trait3	MFI	TBNK	GCST90002114
HLA DR on HLA DR+ CD8br	3060	Violet.510.50.TBNK.trait4	MFI	TBNK	GCST90002115
HLA DR on B cell	3060	Violet.510.50.TBNK.trait5	MFI	TBNK	GCST90002116
HLA DR on HLA DR+ NK	2971	Violet.510.50.TBNK.trait6	MFI	TBNK	GCST90002117
CD8 on CD28+ CD45RA- CD8br	2920	Violet.510.50.Treg.trait2	MFI	Treg	GCST90002118
CD8 on CD28+ CD45RA+ CD8br	2920	Violet.510.50.Treg.trait3	MFI	Treg	GCST90002119
CD8 on CD28- CD8br	2920	Violet.510.50.Treg.trait4	MFI	Treg	GCST90002120
CD8 on CD39+ CD8br	2915	Violet.510.50.Treg.trait5	MFI	Treg	GCST90002121
